# Supplementary material for: TrackMatcher – a tool for finding intercepts in tracks of geographical positions
Source: Copernicus journal article supplement (doi:10.5194/gmd-15-7557-2022), 2022-10-18
Supplement: Supplementary file 1 [file gmd-15-7557-2022-supplement.zip]

Archive with 44 entries (33 files):
- ESM/
- ESM/ESM.pdf
- ESM/example/
- ESM/example/example.jl
- ESM/example/data/
- ESM/example/data/.DS_Store
- ESM/example/data/CALIOP/
- ESM/example/data/CALIOP/.DS_Store
- ESM/example/data/CALIOP/05kmCPro.v4.20/
- ESM/example/data/CALIOP/05kmCPro.v4.20/.DS_Store
- ESM/example/data/CALIOP/05kmCPro.v4.20/2019/
- ESM/example/data/CALIOP/05kmCPro.v4.20/2019/2019_01_27/
- ESM/example/data/CALIOP/05kmCPro.v4.20/2019/2019_01_27/.DS_Store
- ESM/example/data/CALIOP/05kmCPro.v4.20/2019/2019_01_28/
- ESM/example/data/CALIOP/05kmCPro.v4.20/2019/2019_01_28/.DS_Store
- ESM/example/data/CALIOP/05kmCPro.v4.20/2019/2019_01_26/
- ESM/example/data/CALIOP/05kmCPro.v4.20/2019/2019_01_26/.DS_Store
- ESM/example/data/flights/
- ESM/example/data/flights/JAL793_27-JAN-2019_PHNL-RJGG.dat
- ESM/example/data/flights/VOZ120_27-JAN-2019_NZDN-YBBN.dat
- ESM/example/data/flights/UAL200_27-JAN-2019_PGUM-PHNL.dat
- ESM/example/data/flights/ANZ31_27-JAN-2019_SAEZ-NZAA.dat
- ESM/example/data/flights/ANZ30_27-JAN-2019_NZAA-SAEZ.dat
- ESM/example/data/flights/JAL779_26-JAN-2019_PHKO-RJAA.dat
- ESM/example/data/flights/VOZ123_27-JAN-2019_YBBN-NZDN.dat
- ESM/example/data/flights/JAL794_27-JAN-2019_RJGG-PHNL.dat
- ESM/example/data/flights/HAL852_27-JAN-2019_RJTT-PHKO.dat
- ESM/example/data/flights/MAU843_27-JAN-2019_FIMP-FACT.dat
- ESM/example/data/flights/JST219_27-JAN-2019_YMML-NZQN.dat
- ESM/example/data/flights/ANZ192_28-JAN-2019_YPAD-NZAA.dat
- ESM/example/data/flights/UAL201_27-JAN-2019_PHNL-PGUM.dat
- ESM/example/data/flights/ANZ192_27-JAN-2019_YPAD-NZAA.dat
- ESM/example/data/flights/JST220_27-JAN-2019_NZQN-YMML.dat
- ESM/example/data/flights/CCA838_27-JAN-2019_PHNL-ZBAA.dat
- ESM/example/data/flights/ANZ175_27-JAN-2019_NZAA-YPPH.dat
- ESM/example/data/flights/ANZ176_27-JAN-2019_YPPH-NZAA.dat
- ESM/example/data/flights/JAL770_27-JAN-2019_RJAA-PHKO.dat
- ESM/example/data/results/
- ESM/example/data/results/.DS_Store
- ESM/example/data/results/Xex_default.jld2
- ESM/example/data/results/Xextended_default.jld2
- ESM/example/install.jl
- ESM/example/extended_example.jl
- gmd-15-7557-2022-supplement-title-page.pdf
