# Supplementary material for: TrackMatcher – a tool for finding intercepts in tracks of geographical positions
Source: Copernicus journal article supplement (doi:10.5194/gmd-15-7557-2022), 2022-10-18
Supplement: Supplementary file 1 [file gmd-15-7557-2022-supplement.zip › ESM/example/data/flights/ANZ30_27-JAN-2019_NZAA-SAEZ.dat]

Time (CET)	Latitude	Longitude	Course	kts	mph	feet	Rate	Reporting Facility
Sun 08:41:17 AM	-37.0214	174.7517	← 252°	183.0	211.0	850.0	Level	FlightAware ADS-B
Sun 08:41:33 AM	-37.0256	174.7362	← 251°	189.0	217.0	1425.0	1,594 Climbing	FlightAware ADS-B (NZWP)
Sun 08:41:49 AM	-37.0331	174.7212	↙ 225°	197.0	227.0	1700.0	1,359 Climbing	FlightAware ADS-B (AKL / NZAA)
Sun 08:42:05 AM	-37.0463	174.715	↓ 187°	194.0	223.0	2150.0	1,565 Climbing	FlightAware ADS-B (AKL / NZAA)
Sun 08:42:35 AM	-37.0716	174.726	↘ 154°	203.0	234.0	2900.0	1,207 Climbing	FlightAware ADS-B (NZMB)
Sun 08:42:51 AM	-37.0866	174.7355	↘ 151°	218.0	251.0	3075.0	773 Climbing	FlightAware ADS-B (AKL / NZAA)
Sun 08:43:08 AM	-37.1013	174.7519	↘ 131°	242.0	278.0	3325.0	971 Climbing	FlightAware ADS-B (NZPI)
Sun 08:43:25 AM	-37.1115	174.7712	↘ 123°	259.0	298.0	3625.0	1,468 Climbing	FlightAware ADS-B (AKL / NZAA)
Sun 08:43:55 AM	-37.1319	174.8095	↘ 123°	265.0	305.0	4475.0	1,500 Climbing	FlightAware ADS-B (NZPK)
Sun 08:44:25 AM	-37.1522	174.8481	↘ 124°	270.0	311.0	5125.0	1,400 Climbing	FlightAware ADS-B (NZPK)
Sun 08:44:55 AM	-37.1733	174.8876	↘ 124°	271.0	312.0	5875.0	1,500 Climbing	FlightAware ADS-B (AKL / NZAA)
Sun 08:45:25 AM	-37.194	174.9271	↘ 123°	272.0	313.0	6625.0	1,250 Climbing	FlightAware ADS-B (NZPK)
Sun 08:45:55 AM	-37.2152	174.967	↘ 124°	279.0	321.0	7125.0	1,100 Climbing	FlightAware ADS-B (AKL / NZAA)
Sun 08:46:25 AM	-37.2378	175.0094	↘ 124°	284.0	327.0	7725.0	1,200 Climbing	FlightAware ADS-B (NZPI)
Sun 08:46:55 AM	-37.2589	175.0491	↘ 124°	287.0	330.0	8325.0	1,275 Climbing	FlightAware ADS-B (NZPK)
Sun 08:47:25 AM	-37.2812	175.0915	↘ 124°	287.0	330.0	9000.0	1,325 Climbing	FlightAware ADS-B (AMZ / NZAR)
Sun 08:47:55 AM	-37.3034	175.1336	↘ 124°	290.0	334.0	9650.0	1,040 Climbing	FlightAware ADS-B (NZJA)
Sun 08:48:40 AM	-37.3372	175.1976	↘ 123°	308.0	354.0	10300.0	760 Climbing	FlightAware ADS-B (HLZ / NZHN)
Sun 08:49:10 AM	-37.3616	175.2439	↘ 123°	324.0	373.0	10600.0	625 Climbing	FlightAware ADS-B (WHK / NZWK)
Sun 08:49:40 AM	-37.3875	175.2935	↘ 123°	341.0	392.0	10925.0	675 Climbing	FlightAware ADS-B (AKL / NZAA)
Sun 08:50:10 AM	-37.4148	175.3455	↘ 123°	357.0	411.0	11275.0	670 Climbing	FlightAware ADS-B (AKL / NZAA)
Sun 08:50:36 AM	-37.4391	175.3913	↘ 125°	370.0	426.0	11550.0	938 Climbing	FlightAware ADS-B (AKL / NZAA)
Sun 08:51:14 AM	-37.4794	175.4555	↘ 130°	374.0	430.0	12275.0	1,257 Climbing	FlightAware ADS-B (NZRW)
Sun 08:51:44 AM	-37.5123	175.5052	↘ 130°	374.0	430.0	12975.0	1,225 Climbing	FlightAware ADS-B (NZPK)
Sun 08:52:14 AM	-37.546	175.5561	↘ 130°	382.0	440.0	13500.0	1,025 Climbing	FlightAware ADS-B (AKL / NZAA)
Sun 08:52:44 AM	-37.5804	175.6081	↘ 130°	389.0	448.0	14000.0	1,150 Climbing	FlightAware ADS-B (AKL / NZAA)
Sun 08:53:14 AM	-37.6153	175.6609	↘ 130°	392.0	451.0	14650.0	1,325 Climbing	FlightAware ADS-B (AMZ / NZAR)
Sun 08:53:44 AM	-37.6507	175.7148	↘ 130°	396.0	456.0	15325.0	1,250 Climbing	FlightAware ADS-B (NZJA)
Sun 08:54:14 AM	-37.6858	175.7679	↘ 130°	401.0	461.0	15900.0	1,175 Climbing	FlightAware ADS-B (AMZ / NZAR)
Sun 08:54:44 AM	-37.7211	175.8216	↘ 130°	405.0	466.0	16500.0	1,250 Climbing	FlightAware ADS-B (ROT / NZRO)
Sun 08:55:14 AM	-37.757	175.8764	↘ 130°	408.0	470.0	17150.0	1,325 Climbing	FlightAware ADS-B (ROT / NZRO)
Sun 08:55:44 AM	-37.7935	175.9321	↘ 130°	410.0	472.0	17825.0	1,275 Climbing	FlightAware ADS-B (ROT / NZRO)
Sun 08:56:14 AM	-37.8306	175.9887	↘ 130°	415.0	478.0	18425.0	1,200 Climbing	FlightAware ADS-B (NZJA)
Sun 08:56:44 AM	-37.8672	176.0449	↘ 129°	419.0	482.0	19025.0	1,225 Climbing	FlightAware ADS-B (ROT / NZRO)
Sun 08:57:14 AM	-37.9046	176.1023	↘ 129°	423.0	487.0	19650.0	1,250 Climbing	FlightAware ADS-B (ROT / NZRO)
Sun 08:57:44 AM	-37.9415	176.1591	↘ 129°	426.0	490.0	20275.0	1,250 Climbing	FlightAware ADS-B (TRG / NZTG)
Sun 08:58:14 AM	-37.98	176.2184	↘ 129°	429.0	494.0	20900.0	1,180 Climbing	FlightAware ADS-B (NZJA)
Sun 08:58:45 AM	-38.0184	176.2777	↘ 129°	433.0	498.0	21475.0	1,205 Climbing	FlightAware ADS-B (NZJA)
Sun 08:59:15 AM	-38.057	176.3373	↘ 129°	436.0	502.0	22125.0	1,325 Climbing	FlightAware ADS-B (NZJA)
Sun 08:59:45 AM	-38.095	176.3961	↘ 129°	437.0	503.0	22800.0	1,300 Climbing	FlightAware ADS-B (NZJA)
Sun 09:00:15 AM	-38.1339	176.4566	↘ 129°	439.0	505.0	23425.0	1,200 Climbing	FlightAware ADS-B (NZJA)
Sun 09:00:45 AM	-38.1725	176.5165	↘ 129°	441.0	507.0	24000.0	1,082 Climbing	FlightAware ADS-B (NZJA)
Sun 09:01:16 AM	-38.2135	176.5803	↘ 129°	444.0	511.0	24525.0	1,033 Climbing	FlightAware ADS-B (ROT / NZRO)
Sun 09:01:46 AM	-38.2516	176.6397	↘ 129°	447.0	514.0	25050.0	1,100 Climbing	FlightAware ADS-B (NZME)
Sun 09:02:16 AM	-38.2907	176.7009	↘ 129°	450.0	518.0	25625.0	1,137 Climbing	FlightAware ADS-B (NZME)
Sun 09:02:48 AM	-38.3314	176.7646	↘ 129°	454.0	522.0	26225.0	944 Climbing	FlightAware ADS-B (WHK / NZWK)
Sun 09:03:18 AM	-38.3742	176.8317	↘ 129°	461.0	531.0	26600.0	800 Climbing	FlightAware ADS-B (PMR / NZPM)
Sun 09:03:48 AM	-38.4162	176.8979	↘ 129°	467.0	537.0	27025.0	825 Climbing	FlightAware ADS-B (PPQ / NZPP)
Sun 09:04:18 AM	-38.4558	176.9603	↘ 129°	470.0	541.0	27425.0	900 Climbing	FlightAware ADS-B (PMR / NZPM)
Sun 09:04:48 AM	-38.496	177.024	↘ 129°	473.0	544.0	27925.0	1,125 Climbing	FlightAware ADS-B (PMR / NZPM)
Sun 09:05:18 AM	-38.5391	177.092	↘ 129°	475.0	547.0	28550.0	1,125 Climbing	FlightAware ADS-B (NPE / NZNR)
Sun 09:05:48 AM	-38.5806	177.158	↘ 129°	477.0	549.0	29050.0	975 Climbing	FlightAware ADS-B (NZTN)
Sun 09:06:18 AM	-38.6224	177.2244	↘ 129°	478.0	550.0	29525.0	1,200 Climbing	FlightAware ADS-B (NZTN)
Sun 09:06:48 AM	-38.6611	177.2859	↘ 129°	473.0	544.0	30250.0	1,549 Climbing	FlightAware ADS-B (TUO / NZAP)
Sun 09:07:19 AM	-38.7046	177.3552	↘ 129°	466.0	536.0	31100.0	1,672 Climbing	FlightAware ADS-B (NPE / NZNR)
Sun 09:07:49 AM	-38.7447	177.4194	↘ 129°	458.0	527.0	31950.0	1,600 Climbing	FlightAware ADS-B (WHK / NZWK)
Sun 09:08:19 AM	-38.7835	177.4816	↘ 129°	450.0	518.0	32700.000000000004	1,075 Climbing	FlightAware ADS-B (NPE / NZNR)
Sun 09:08:49 AM	-38.8223	177.5438	↘ 129°	448.0	516.0	33025.0	295 Climbing	FlightAware ADS-B (NZHS)
Sun 09:09:20 AM	-38.8623	177.6079	↘ 128°	448.0	516.0	33000.0	-25 Descending	FlightAware ADS-B (NZHS)
Sun 09:09:50 AM	-38.901	177.6706	↘ 128°	448.0	516.0	33000.0	Level	FlightAware ADS-B (NPE / NZNR)
Sun 09:10:20 AM	-38.9395	177.7325	↘ 129°	448.0	516.0	33000.0	Level	FlightAware ADS-B (NZHS)
Sun 09:10:50 AM	-38.9784	177.7956	↘ 128°	449.0	517.0	33000.0	Level	FlightAware ADS-B (NPE / NZNR)
Sun 09:11:20 AM	-39.0174	177.8588	↘ 128°	449.0	517.0	33000.0	Level	FlightAware ADS-B (NPE / NZNR)
Sun 09:11:50 AM	-39.056	177.9214	↘ 128°	449.0	517.0	33000.0	Level	FlightAware ADS-B (NZHS)
Sun 09:12:20 AM	-39.0946	177.9843	↘ 128°	448.0	516.0	33000.0	Level	FlightAware ADS-B (NZHS)
Sun 09:12:51 AM	-39.1332	178.0472	↘ 128°	447.0	514.0	33000.0	Level	FlightAware ADS-B (NPE / NZNR)
Sun 09:13:21 AM	-39.1716	178.1099	↘ 128°	447.0	514.0	33000.0	Level	FlightAware ADS-B (NPE / NZNR)
Sun 09:13:51 AM	-39.2109	178.1742	↘ 128°	447.0	514.0	33000.0	Level	FlightAware ADS-B (TUO / NZAP)
Sun 09:14:21 AM	-39.2486	178.2362	↘ 128°	446.0	513.0	33000.0	Level	FlightAware ADS-B (NPE / NZNR)
Sun 09:14:51 AM	-39.2869	178.2991	↘ 128°	446.0	513.0	33000.0	Level	FlightAware ADS-B (NPE / NZNR)
Sun 09:15:21 AM	-39.3251	178.362	↘ 128°	445.0	512.0	33000.0	Level	FlightAware ADS-B (NPE / NZNR)
Sun 09:15:51 AM	-39.3631	178.4247	↘ 128°	445.0	512.0	33000.0	Level	FlightAware ADS-B (NPE / NZNR)
Sun 09:16:21 AM	-39.4015	178.4882	↘ 128°	445.0	512.0	33000.0	Level	FlightAware ADS-B (NPE / NZNR)
Sun 09:16:51 AM	-39.4396	178.5512	↘ 128°	445.0	512.0	33000.0	Level	FlightAware ADS-B (NPE / NZNR)
Sun 09:17:22 AM	-39.4792	178.617	↘ 128°	446.0	513.0	33000.0	Level	FlightAware ADS-B (NZJM)
Sun 09:17:53 AM	-39.5171	178.6801	↘ 128°	446.0	513.0	33000.0	Level	FlightAware ADS-B (NZJM)
Sun 09:18:31 AM	-39.5657	178.761	↘ 128°	446.0	513.0	33000.0	Level	FlightAware ADS-B (NPE / NZNR)
Sun 09:19:04 AM	-39.6077	178.8312	↘ 128°	446.0	513.0	33000.0	Level	FlightAware ADS-B (NZJM)
Sun 09:19:34 AM	-39.645	178.8947	↘ 126°	448.0	516.0	33000.0	Level	FlightAware ADS-B (NZJM)
Sun 09:19:53 AM	-39.6662	178.9381	↘ 121°	451.0	519.0	33000.0	Level	FlightAware ADS-B (NZJM)
Sun 09:20:29 AM	-39.7002	179.0288	↘ 115°	457.0	526.0	33000.0	Level	FlightAware ADS-B (NZTN)
Sun 09:21:11 AM	-39.7361	179.1317	↘ 114°	457.0	526.0	33000.0	Level	FlightAware ADS-B (NPE / NZNR)
Sun 09:21:42 AM	-39.7633	179.2098	↘ 114°	457.0	526.0	33000.0	Level	FlightAware ADS-B
Sun 09:22:12 AM	-39.7888	179.2831	↘ 114°	456.0	525.0	33000.0	Level	FlightAware ADS-B (NPE / NZNR)
Sun 09:22:42 AM	-39.8146	179.3573	↘ 114°	457.0	526.0	33000.0	Level	FlightAware ADS-B (NPE / NZNR)
Sun 09:23:12 AM	-39.8409	179.4329	↘ 114°	458.0	527.0	33000.0	Level	FlightAware ADS-B (NPE / NZNR)
Sun 09:23:42 AM	-39.8669	179.5079	↘ 114°	457.0	526.0	33000.0	Level	FlightAware ADS-B (NPE / NZNR)
Sun 09:24:13 AM	-39.8943	179.5875	↘ 114°	458.0	527.0	33000.0	Level	FlightAware ADS-B
Sun 09:24:45 AM	-39.9217	179.6674	↘ 114°	460.0	529.0	33000.0	Level	FlightAware ADS-B (NPE / NZNR)
Sun 09:25:15 AM	-39.9479	179.7436	↘ 114°	461.0	531.0	33000.0	Level	FlightAware ADS-B (NPE / NZNR)
Sun 09:25:45 AM	-39.9739	179.8196	↘ 114°	461.0	531.0	33000.0	Level	FlightAware ADS-B (NPE / NZNR)
Sun 09:26:15 AM	-39.9998	179.8956	↘ 114°	460.0	529.0	33000.0	Level	FlightAware ADS-B (NPE / NZNR)
Sun 09:26:45 AM	-40.0257	179.9718	↘ 114°	460.0	529.0	33000.0	Level	FlightAware ADS-B (NPE / NZNR)
Sun 09:27:15 AM	-40.0511	-179.9535	↘ 114°	461.0	531.0	33000.0	Level	FlightAware ADS-B (NPE / NZNR)
Sun 09:27:45 AM	-40.0774	-179.8755	↘ 114°	462.0	532.0	33000.0	Level	FlightAware ADS-B (NPE / NZNR)
Sun 09:28:15 AM	-40.1028	-179.8003	↘ 114°	461.0	531.0	33000.0	Level	FlightAware ADS-B (NPE / NZNR)
Sun 09:28:45 AM	-40.1289	-179.7228	↘ 114°	461.0	531.0	33000.0	Level	FlightAware ADS-B (NPE / NZNR)
Sun 09:29:15 AM	-40.1542	-179.6475	↘ 114°	461.0	531.0	33000.0	Level	FlightAware ADS-B (NPE / NZNR)
Sun 09:29:45 AM	-40.1799	-179.5703	↘ 114°	461.0	531.0	33000.0	Level	FlightAware ADS-B (NZJH)
Sun 09:30:24 AM	-40.2134	-179.4701	↘ 113°	461.0	531.0	33000.0	Level	FlightAware ADS-B (NPE / NZNR)
Sun 09:30:54 AM	-40.2383	-179.3953	↘ 113°	461.0	531.0	33000.0	Level	FlightAware ADS-B (NPE / NZNR)
Sun 09:31:24 AM	-40.2646	-179.3158	↘ 113°	461.0	531.0	33000.0	Level	FlightAware ADS-B (NPE / NZNR)
Sun 09:31:54 AM	-40.2897	-179.24	↘ 113°	461.0	531.0	33000.0	Level	FlightAware ADS-B (NPE / NZNR)
Sun 09:32:24 AM	-40.3153	-179.1622	↘ 113°	461.0	531.0	33000.0	Level	FlightAware ADS-B (NPE / NZNR)
Sun 09:32:54 AM	-40.34	-179.0871	↘ 113°	460.0	529.0	33000.0	Level	FlightAware ADS-B (NPE / NZNR)
Sun 09:33:24 AM	-40.3655	-179.0096	↘ 113°	461.0	531.0	33000.0	Level	FlightAware ADS-B (NPE / NZNR)
Sun 09:34:12 AM	-40.4061	-178.8853	↘ 113°	460.0	529.0	33000.0	Level	FlightAware ADS-B
Sun 09:34:55 AM	-40.4417	-178.7758	↘ 113°	461.0	531.0	33000.0	Level	FlightAware ADS-B (NPE / NZNR)
Sun 09:35:55 AM	-40.4906	-178.625	↘ 113°	461.0	531.0	33000.0	Level	FlightAware ADS-B
Sun 09:38:03 AM	-40.5971	-178.2933	↘ 113°	462.0	532.0	33000.0	13 Climbing	FlightAware ADS-B (NPE / NZNR)
Sun 05:26:17 PM	-42.8254	-76.6321	↗ 63°	530.0	610.0	39000.0	Level	FlightAware ADS-B (MHC / SCPQ)
Sun 05:27:17 PM	-42.7597	-76.4555	↗ 63°	528.0	608.0	39000.0	Level	FlightAware ADS-B (MHC / SCPQ)
Sun 05:27:47 PM	-42.7257	-76.3645	↗ 63°	527.0	606.0	39000.0	Level	FlightAware ADS-B (MHC / SCPQ)
Sun 05:28:17 PM	-42.6931	-76.2771	↗ 63°	525.0	604.0	39000.0	Level	FlightAware ADS-B (MHC / SCPQ)
Sun 05:28:47 PM	-42.6594	-76.1877	↗ 63°	524.0	603.0	39000.0	Level	FlightAware ADS-B (MHC / SCPQ)
Sun 05:29:17 PM	-42.6264	-76.1001	↗ 63°	526.0	605.0	39000.0	Level	FlightAware ADS-B (MHC / SCPQ)
Sun 05:29:47 PM	-42.5934	-76.0128	↗ 63°	526.0	605.0	39000.0	Level	FlightAware ADS-B (MHC / SCPQ)
Sun 05:30:17 PM	-42.5596	-75.9238	↗ 63°	526.0	605.0	39000.0	Level	FlightAware ADS-B (MHC / SCPQ)
Sun 05:30:47 PM	-42.5262	-75.8361	↗ 63°	526.0	605.0	39000.0	Level	FlightAware ADS-B (MHC / SCPQ)
Sun 05:31:18 PM	-42.4925	-75.7479	↗ 63°	526.0	605.0	39000.0	Level	FlightAware ADS-B (MHC / SCPQ)
Sun 05:31:48 PM	-42.459	-75.6603	↗ 63°	527.0	606.0	39000.0	Level	FlightAware ADS-B (MHC / SCPQ)
Sun 05:32:18 PM	-42.4251	-75.572	↗ 63°	526.0	605.0	39000.0	Level	FlightAware ADS-B (MHC / SCPQ)
Sun 05:33:10 PM	-42.3665	-75.4198	↗ 63°	526.0	605.0	39000.0	Level	FlightAware ADS-B (MHC / SCPQ)
Sun 05:34:00 PM	-42.3105	-75.2755	↗ 62°	526.0	605.0	39000.0	Level	FlightAware ADS-B (MHC / SCPQ)
Sun 05:34:54 PM	-42.249	-75.1178	↗ 62°	527.0	606.0	39000.0	Level	FlightAware ADS-B (MHC / SCPQ)
Sun 05:35:24 PM	-42.2147	-75.0303	↗ 62°	527.0	606.0	39000.0	Level	FlightAware ADS-B (MHC / SCPQ)
Sun 05:35:54 PM	-42.1801	-74.9423	↗ 62°	528.0	608.0	39000.0	Level	FlightAware ADS-B (MHC / SCPQ)
Sun 05:36:24 PM	-42.1457	-74.8547	↗ 62°	528.0	608.0	39000.0	Level	FlightAware ADS-B (MHC / SCPQ)
Sun 05:36:54 PM	-42.1118	-74.7686	↗ 62°	528.0	608.0	39000.0	Level	FlightAware ADS-B (MHC / SCPQ)
Sun 05:37:24 PM	-42.0773	-74.6816	↗ 62°	528.0	608.0	39000.0	Level	FlightAware ADS-B (MHC / SCPQ)
Sun 05:38:18 PM	-42.0161	-74.5277	↗ 62°	528.0	608.0	39000.0	Level	FlightAware ADS-B (MHC / SCPQ)
Sun 05:38:48 PM	-41.9811	-74.4402	↗ 62°	526.0	605.0	39000.0	Level	FlightAware ADS-B (MHC / SCPQ)
Sun 05:39:18 PM	-41.9472	-74.3553	↗ 62°	525.0	604.0	39000.0	Level	FlightAware ADS-B (MHC / SCPQ)
Sun 05:39:48 PM	-41.9123	-74.2685	↗ 62°	525.0	604.0	39000.0	Level	FlightAware ADS-B (MHC / SCPQ)
Sun 05:40:18 PM	-41.8775	-74.1822	↗ 62°	523.0	602.0	39000.0	Level	FlightAware ADS-B (MHC / SCPQ)
Sun 05:40:48 PM	-41.843	-74.097	↗ 62°	521.0	600.0	39000.0	Level	FlightAware ADS-B (MHC / SCPQ)
Sun 05:41:18 PM	-41.8085	-74.0119	↗ 62°	520.0	598.0	39000.0	Level	FlightAware ADS-B (MHC / SCPQ)
Sun 05:41:48 PM	-41.7737	-73.9264	↗ 62°	520.0	598.0	39000.0	Level	FlightAware ADS-B (MHC / SCPQ)
Sun 05:42:25 PM	-41.7321	-73.8242	↗ 61°	520.0	598.0	39000.0	Level	FlightAware ADS-B (ZCO / SCTC)
Sun 05:43:06 PM	-41.6843	-73.7076	↗ 61°	520.0	598.0	39000.0	Level	FlightAware ADS-B (MHC / SCPQ)
Sun 05:43:45 PM	-41.6402	-73.6002	↗ 61°	519.0	597.0	39000.0	Level	FlightAware ADS-B (MHC / SCPQ)
Sun 05:44:18 PM	-41.6004	-73.5036	↗ 61°	517.0	595.0	39000.0	Level	FlightAware ADS-B (MHC / SCPQ)
Sun 05:44:49 PM	-41.5659	-73.4203	↗ 61°	516.0	594.0	39000.0	Level	FlightAware ADS-B (MHC / SCPQ)
Sun 05:45:19 PM	-41.5309	-73.3358	↗ 61°	515.0	593.0	39000.0	Level	FlightAware ADS-B (MHC / SCPQ)
Sun 05:45:49 PM	-41.4962	-73.2522	↗ 61°	514.0	592.0	39000.0	Level	FlightAware ADS-B (MHC / SCPQ)
Sun 05:46:19 PM	-41.4614	-73.1689	↗ 61°	514.0	592.0	39000.0	Level	FlightAware ADS-B (MHC / SCPQ)
Sun 05:46:49 PM	-41.432	-73.0819	→ 71°	520.0	598.0	39000.0	Level	FlightAware ADS-B (MHC / SCPQ)
Sun 05:47:19 PM	-41.4153	-72.9935	→ 80°	524.0	603.0	39000.0	Level	FlightAware ADS-B (ZCO / SCTC)
Sun 05:47:49 PM	-41.401	-72.8933	→ 79°	523.0	602.0	39000.0	Level	FlightAware ADS-B (MHC / SCPQ)
Sun 05:48:19 PM	-41.3875	-72.7983	→ 79°	522.0	601.0	39000.0	Level	FlightAware ADS-B (MHC / SCPQ)
Sun 05:48:49 PM	-41.3746	-72.7079	→ 79°	521.0	600.0	39000.0	Level	FlightAware ADS-B (ZCO / SCTC)
Sun 05:49:19 PM	-41.3612	-72.6139	→ 79°	520.0	598.0	39000.0	Level	FlightAware ADS-B (ZCO / SCTC)
Sun 05:49:49 PM	-41.3475	-72.519	→ 79°	520.0	598.0	39000.0	Level	FlightAware ADS-B (ZCO / SCTC)
Sun 05:50:19 PM	-41.333	-72.4246	→ 78°	520.0	598.0	39000.0	Level	FlightAware ADS-B (ZCO / SCTC)
Sun 05:50:49 PM	-41.3181	-72.3308	→ 78°	521.0	600.0	39000.0	Level	FlightAware ADS-B (ZCO / SCTC)
Sun 05:51:19 PM	-41.3034	-72.2373	→ 78°	521.0	600.0	39000.0	Level	FlightAware ADS-B (ZCO / SCTC)
Sun 05:51:49 PM	-41.2884	-72.1432	→ 78°	520.0	598.0	39000.0	Level	FlightAware ADS-B (ZCO / SCTC)
Sun 05:52:19 PM	-41.2734	-72.0489	→ 78°	520.0	598.0	39000.0	Level	FlightAware ADS-B (ZCO / SCTC)
Sun 05:52:49 PM	-41.2591	-71.9587	→ 78°	520.0	598.0	39000.0	Level	FlightAware ADS-B (ZCO / SCTC)
Sun 05:53:20 PM	-41.2434	-71.8617	→ 78°	522.0	601.0	39000.0	Level	FlightAware ADS-B (ZCO / SCTC)
Sun 05:53:50 PM	-41.2286	-71.7662	→ 79°	522.0	601.0	39000.0	Level	FlightAware ADS-B (ZCO / SCTC)
Sun 05:54:23 PM	-41.2132	-71.6623	→ 79°	523.0	602.0	39000.0	Level	FlightAware ADS-B (BRC / SAZS)
Sun 05:54:53 PM	-41.199	-71.569	→ 79°	525.0	604.0	39000.0	Level	FlightAware ADS-B (BRC / SAZS)
Sun 05:55:25 PM	-41.1834	-71.4657	→ 79°	526.0	605.0	39000.0	Level	FlightAware ADS-B
Sun 05:56:09 PM	-41.1624	-71.3303	→ 78°	527.0	606.0	39000.0	-20 Descending	FlightAware ADS-B (BRC / SAZS)
Sun 05:56:39 PM	-41.147	-71.233	→ 77°	528.0	608.0	38975.0	Level	FlightAware ADS-B (BRC / SAZS)
Sun 05:57:10 PM	-41.1278	-71.1326	→ 75°	527.0	606.0	39000.0	25 Climbing	FlightAware ADS-B (EHL / SAVB)
Sun 05:57:40 PM	-41.107	-71.0383	→ 74°	528.0	608.0	39000.0	Level	FlightAware ADS-B (EHL / SAVB)
Sun 05:58:10 PM	-41.0875	-70.9507	→ 74°	530.0	610.0	39000.0	Level	FlightAware ADS-B (BRC / SAZS)
Sun 05:58:42 PM	-41.065	-70.8507	→ 74°	533.0	613.0	39000.0	-20 Descending	FlightAware ADS-B (BRC / SAZS)
Sun 05:59:26 PM	-41.0337	-70.7113	→ 74°	534.0	615.0	38975.0	19 Climbing	FlightAware ADS-B
Sun 06:00:01 PM	-41.01	-70.6063	→ 73°	531.0	611.0	39025.0	21 Climbing	FlightAware ADS-B (BRC / SAZS)
Sun 06:00:39 PM	-40.9824	-70.4846	→ 73°	533.0	613.0	39000.0	-22 Descending	FlightAware ADS-B (BRC / SAZS)
Sun 06:01:09 PM	-40.9612	-70.3919	→ 73°	533.0	613.0	39000.0	Level	FlightAware ADS-B (ZCO / SCTC)
Sun 06:01:39 PM	-40.9397	-70.2978	→ 73°	536.0	617.0	39000.0	-25 Descending	FlightAware ADS-B (ZCO / SCTC)
Sun 06:02:09 PM	-40.9177	-70.2024	→ 73°	537.0	618.0	38975.0	Level	FlightAware ADS-B
Sun 06:02:41 PM	-40.895	-70.1044	→ 73°	540.0	621.0	39000.0	22 Climbing	FlightAware ADS-B (NQN / SAZN)
Sun 06:03:18 PM	-40.8674	-69.9855	→ 73°	542.0	624.0	39000.0	Level	FlightAware ADS-B (NQN / SAZN)
Sun 06:03:48 PM	-40.8453	-69.89	→ 73°	543.0	625.0	39000.0	Level	FlightAware ADS-B (NQN / SAZN)
Sun 06:04:20 PM	-40.8217	-69.7899	→ 73°	546.0	628.0	39000.0	Level	FlightAware ADS-B (NQN / SAZN)
Sun 06:04:53 PM	-40.7969	-69.6844	→ 73°	548.0	631.0	39000.0	Level	FlightAware ADS-B (NQN / SAZN)
Sun 06:05:26 PM	-40.7724	-69.5807	→ 73°	550.0	633.0	39000.0	24 Climbing	FlightAware ADS-B (ZCO / SCTC)
Sun 06:05:56 PM	-40.7495	-69.4843	→ 73°	551.0	634.0	39025.0	-25 Descending	FlightAware ADS-B (ZCO / SCTC)
Sun 06:06:26 PM	-40.7267	-69.3886	→ 73°	551.0	634.0	38975.0	-22 Descending	FlightAware ADS-B (NQN / SAZN)
Sun 06:07:03 PM	-40.6978	-69.2677	→ 73°	552.0	635.0	39000.0	22 Climbing	FlightAware ADS-B (NQN / SAZN)
Sun 06:07:33 PM	-40.6745	-69.1714	→ 72°	553.0	636.0	39000.0	-25 Descending	FlightAware ADS-B (NQN / SAZN)
Sun 06:08:04 PM	-40.6516	-69.0767	→ 72°	554.0	638.0	38975.0	Level	FlightAware ADS-B (NQN / SAZN)
Sun 06:08:45 PM	-40.6186	-68.9405	→ 72°	553.0	636.0	39000.0	20 Climbing	FlightAware ADS-B
Sun 06:09:20 PM	-40.5911	-68.8279	→ 72°	553.0	636.0	39000.0	Level	FlightAware ADS-B (NQN / SAZN)
Sun 06:09:52 PM	-40.5662	-68.7264	→ 72°	556.0	640.0	39000.0	Level	FlightAware ADS-B (NQN / SAZN)
Sun 06:10:23 PM	-40.5415	-68.6265	→ 72°	556.0	640.0	39000.0	Level	FlightAware ADS-B (NQN / SAZN)
Sun 06:10:53 PM	-40.519	-68.5354	→ 72°	556.0	640.0	39000.0	Level	FlightAware ADS-B (NQN / SAZN)
Sun 06:11:23 PM	-40.4945	-68.4369	→ 72°	556.0	640.0	39000.0	Level	FlightAware ADS-B (NQN / SAZN)
Sun 06:11:57 PM	-40.4668	-68.3257	→ 72°	558.0	642.0	39000.0	Level	FlightAware ADS-B (NQN / SAZN)
Sun 06:12:27 PM	-40.4425	-68.2283	→ 72°	558.0	642.0	39000.0	Level	FlightAware ADS-B (NQN / SAZN)
Sun 06:12:57 PM	-40.4183	-68.1325	→ 72°	559.0	643.0	39000.0	Level	FlightAware ADS-B (NQN / SAZN)
Sun 06:13:27 PM	-40.3937	-68.0352	→ 72°	559.0	643.0	39000.0	Level	FlightAware ADS-B (NQN / SAZN)
Sun 06:13:57 PM	-40.3692	-67.9386	→ 72°	561.0	646.0	39000.0	Level	FlightAware ADS-B (NQN / SAZN)
Sun 06:14:27 PM	-40.3447	-67.8423	→ 72°	561.0	646.0	39000.0	Level	FlightAware ADS-B (NQN / SAZN)
Sun 06:14:57 PM	-40.3199	-67.7451	→ 72°	562.0	647.0	39000.0	Level	FlightAware ADS-B (NQN / SAZN)
Sun 06:15:29 PM	-40.2938	-67.6432	→ 71°	561.0	646.0	39000.0	Level	FlightAware ADS-B (NQN / SAZN)
Sun 06:15:59 PM	-40.2688	-67.5462	→ 71°	562.0	647.0	39000.0	Level	FlightAware ADS-B (REL / SAVT)
Sun 06:16:37 PM	-40.2366	-67.4221	→ 71°	562.0	647.0	39000.0	Level	FlightAware ADS-B (REL / SAVT)
Sun 06:17:07 PM	-40.2116	-67.326	→ 71°	562.0	647.0	39000.0	Level	FlightAware ADS-B (REL / SAVT)
Sun 06:17:37 PM	-40.1872	-67.2322	→ 71°	562.0	647.0	39000.0	Level	FlightAware ADS-B (REL / SAVT)
Sun 06:17:57 PM	-40.1696	-67.1687	→ 67°	557.0	641.0	39000.0	Level	FlightAware ADS-B (REL / SAVT)
Sun 06:18:42 PM	-40.1146	-67.0398	↗ 59°	547.0	629.0	39000.0	Level	FlightAware ADS-B (NQN / SAZN)
Sun 06:19:14 PM	-40.0718	-66.9459	↗ 59°	545.0	627.0	39000.0	Level	FlightAware ADS-B (REL / SAVT)
Sun 06:19:44 PM	-40.0331	-66.8611	↗ 59°	544.0	626.0	39000.0	Level	FlightAware ADS-B (REL / SAVT)
Sun 06:20:24 PM	-39.9798	-66.7559	↗ 56°	539.0	620.0	39000.0	Level	FlightAware ADS-B (NQN / SAZN)
Sun 06:20:54 PM	-39.9386	-66.6766	↗ 56°	538.0	619.0	39000.0	Level	FlightAware ADS-B (NQN / SAZN)
Sun 06:21:24 PM	-39.8967	-66.5962	↗ 56°	536.0	617.0	39000.0	Level	FlightAware ADS-B (NQN / SAZN)
Sun 06:21:54 PM	-39.8539	-66.5144	↗ 56°	536.0	617.0	39000.0	Level	FlightAware ADS-B (NQN / SAZN)
Sun 06:22:24 PM	-39.812	-66.4361	↗ 53°	534.0	615.0	39000.0	Level	FlightAware ADS-B (NQN / SAZN)
Sun 06:22:58 PM	-39.7596	-66.3517	↗ 51°	530.0	610.0	39000.0	Level	FlightAware ADS-B (NQN / SAZN)
Sun 06:23:32 PM	-39.705	-66.2658	↗ 51°	531.0	611.0	39000.0	Level	FlightAware ADS-B (NQN / SAZN)
Sun 06:24:02 PM	-39.6584	-66.1928	↗ 50°	533.0	613.0	39000.0	Level	FlightAware ADS-B (NQN / SAZN)
Sun 06:24:33 PM	-39.61	-66.1174	↗ 50°	533.0	613.0	39000.0	Level	FlightAware ADS-B (VDM / SAVV)
Sun 06:25:03 PM	-39.5635	-66.0452	↗ 50°	534.0	615.0	39000.0	Level	FlightAware ADS-B (VDM / SAVV)
Sun 06:25:35 PM	-39.5123	-65.9659	↗ 50°	535.0	616.0	39000.0	Level	FlightAware ADS-B (NQN / SAZN)
Sun 06:26:08 PM	-39.4591	-65.8839	↗ 50°	534.0	615.0	39000.0	Level	FlightAware ADS-B (NQN / SAZN)
Sun 06:26:38 PM	-39.4097	-65.8082	↗ 50°	534.0	615.0	39000.0	Level	FlightAware ADS-B (NQN / SAZN)
Sun 06:27:09 PM	-39.3624	-65.7361	↗ 50°	534.0	615.0	39000.0	Level	FlightAware ADS-B (VDM / SAVV)
Sun 06:27:39 PM	-39.3148	-65.6637	↗ 50°	534.0	615.0	39000.0	Level	FlightAware ADS-B (VDM / SAVV)
Sun 06:28:09 PM	-39.2665	-65.5905	↗ 50°	533.0	613.0	39000.0	Level	FlightAware ADS-B (NQN / SAZN)
Sun 06:28:30 PM	-39.234	-65.5423	↗ 48°	529.0	609.0	39000.0	Level	FlightAware ADS-B (NQN / SAZN)
Sun 06:29:02 PM	-39.1793	-65.4658	↗ 47°	527.0	606.0	39000.0	Level	FlightAware ADS-B (NQN / SAZN)
Sun 06:29:32 PM	-39.1293	-65.3961	↗ 47°	527.0	606.0	39000.0	Level	FlightAware ADS-B (NQN / SAZN)
Sun 06:30:02 PM	-39.0798	-65.3274	↗ 47°	525.0	604.0	39000.0	Level	FlightAware ADS-B (NQN / SAZN)
Sun 06:30:32 PM	-39.0302	-65.2588	↗ 47°	524.0	603.0	39000.0	Level	FlightAware ADS-B (NQN / SAZN)
Sun 06:31:05 PM	-38.9762	-65.1844	↗ 47°	523.0	602.0	39000.0	Level	FlightAware ADS-B (BHI / SAZB)
Sun 06:31:35 PM	-38.9268	-65.1165	↗ 47°	522.0	601.0	39000.0	Level	FlightAware ADS-B (BHI / SAZB)
Sun 06:32:01 PM	-38.8863	-65.0532	↗ 59°	541.0	623.0	39000.0	Level	FlightAware ADS-B (BHI / SAZB)
Sun 06:32:50 PM	-38.8368	-64.9051	→ 69°	560.0	644.0	39000.0	Level	FlightAware ADS-B (NQN / SAZN)
Sun 06:33:20 PM	-38.8098	-64.8113	→ 70°	560.0	644.0	39000.0	Level	FlightAware ADS-B (NQN / SAZN)
Sun 06:33:50 PM	-38.7854	-64.7175	→ 74°	562.0	647.0	39000.0	Level	FlightAware ADS-B (BHI / SAZB)
Sun 06:34:21 PM	-38.7654	-64.6213	→ 75°	562.0	647.0	39000.0	Level	FlightAware ADS-B (BHI / SAZB)
Sun 06:34:51 PM	-38.7455	-64.5243	→ 75°	560.0	644.0	39000.0	Level	FlightAware ADS-B (BHI / SAZB)
Sun 06:35:23 PM	-38.724	-64.4202	→ 75°	562.0	647.0	39000.0	Level	FlightAware ADS-B (RSA / SAZR)
Sun 06:35:53 PM	-38.7038	-64.3235	→ 75°	562.0	647.0	39000.0	Level	FlightAware ADS-B (RSA / SAZR)
Sun 06:36:23 PM	-38.6843	-64.2307	→ 75°	562.0	647.0	39000.0	Level	FlightAware ADS-B (RSA / SAZR)
Sun 06:36:53 PM	-38.6643	-64.1361	→ 75°	563.0	648.0	39000.0	Level	FlightAware ADS-B (RSA / SAZR)
Sun 06:37:23 PM	-38.6432	-64.0373	→ 75°	563.0	648.0	39000.0	Level	FlightAware ADS-B (RSA / SAZR)
Sun 06:37:53 PM	-38.6225	-63.9408	→ 75°	564.0	649.0	39000.0	Level	FlightAware ADS-B (RSA / SAZR)
Sun 06:38:23 PM	-38.6014	-63.8432	→ 75°	565.0	650.0	39000.0	Level	FlightAware ADS-B (RSA / SAZR)
Sun 06:38:53 PM	-38.5804	-63.7466	→ 74°	566.0	651.0	39000.0	Level	FlightAware ADS-B (RSA / SAZR)
Sun 06:39:23 PM	-38.5593	-63.6505	→ 74°	566.0	651.0	39000.0	Level	FlightAware ADS-B (RSA / SAZR)
Sun 06:39:53 PM	-38.5378	-63.5535	→ 74°	567.0	652.0	39000.0	Level	FlightAware ADS-B (BHI / SAZB)
Sun 06:40:23 PM	-38.5163	-63.4567	→ 74°	569.0	655.0	39000.0	Level	FlightAware ADS-B (RSA / SAZR)
Sun 06:40:53 PM	-38.4951	-63.3622	→ 74°	569.0	655.0	39000.0	Level	FlightAware ADS-B (BHI / SAZB)
Sun 06:41:23 PM	-38.4728	-63.2634	→ 74°	569.0	655.0	39000.0	Level	FlightAware ADS-B (RSA / SAZR)
Sun 06:41:53 PM	-38.4514	-63.1692	→ 74°	569.0	655.0	39000.0	Level	FlightAware ADS-B (BHI / SAZB)
Sun 06:42:24 PM	-38.4284	-63.0685	→ 74°	569.0	655.0	39000.0	Level	FlightAware ADS-B (RSA / SAZR)
Sun 06:42:54 PM	-38.4062	-62.9728	→ 74°	569.0	655.0	39000.0	Level	FlightAware ADS-B (RSA / SAZR)
Sun 06:43:24 PM	-38.3837	-62.8758	→ 74°	569.0	655.0	39000.0	Level	FlightAware ADS-B (RSA / SAZR)
Sun 06:43:54 PM	-38.3611	-62.7791	→ 74°	570.0	656.0	39000.0	Level	FlightAware ADS-B (RSA / SAZR)
Sun 06:44:33 PM	-38.3315	-62.6535	→ 73°	569.0	655.0	39000.0	Level	FlightAware ADS-B (SAZA)
Sun 06:45:07 PM	-38.3056	-62.5443	→ 73°	567.0	652.0	39000.0	Level	FlightAware ADS-B (PEH / SAZP)
Sun 06:45:40 PM	-38.2793	-62.4348	→ 73°	568.0	654.0	39000.0	Level	FlightAware ADS-B (BHI / SAZB)
Sun 06:46:15 PM	-38.2538	-62.3294	→ 73°	567.0	652.0	39000.0	Level	FlightAware ADS-B (RSA / SAZR)
Sun 06:46:45 PM	-38.2306	-62.2339	→ 73°	567.0	652.0	39000.0	Level	FlightAware ADS-B (RSA / SAZR)
Sun 06:47:15 PM	-38.2069	-62.1369	→ 73°	567.0	652.0	39000.0	Level	FlightAware ADS-B (RSA / SAZR)
Sun 06:47:45 PM	-38.184	-62.0441	→ 73°	567.0	652.0	39000.0	Level	FlightAware ADS-B (RSA / SAZR)
Sun 06:48:16 PM	-38.1596	-61.9456	→ 73°	567.0	652.0	39000.0	Level	FlightAware ADS-B (NEC / SAZO)
Sun 06:48:50 PM	-38.1324	-61.8368	→ 72°	566.0	651.0	39000.0	Level	FlightAware ADS-B (BHI / SAZB)
Sun 06:49:20 PM	-38.1083	-61.7409	→ 72°	566.0	651.0	39000.0	-25 Descending	FlightAware ADS-B (BHI / SAZB)
Sun 06:49:49 PM	-38.0844	-61.6488	→ 70°	563.0	648.0	38975.0	Level	FlightAware ADS-B (SAZA)
Sun 06:50:16 PM	-38.0454	-61.5769	↗ 49°	531.0	611.0	39000.0	30 Climbing	FlightAware ADS-B (SADM)
Sun 06:50:39 PM	-38.0074	-61.5305	↗ 42°	521.0	600.0	39000.0	Level	FlightAware ADS-B (BHI / SAZB)
Sun 06:51:10 PM	-37.9501	-61.4714	↗ 38°	515.0	593.0	39000.0	Level	FlightAware ADS-B (BHI / SAZB)
Sun 06:51:40 PM	-37.8913	-61.4164	↗ 36°	511.0	588.0	39000.0	Level	FlightAware ADS-B (BHI / SAZB)
Sun 06:52:10 PM	-37.8343	-61.3651	↗ 35°	509.0	586.0	39000.0	Level	FlightAware ADS-B (BHI / SAZB)
Sun 06:52:42 PM	-37.7722	-61.31	↗ 35°	510.0	587.0	39000.0	Level	FlightAware ADS-B (MDQ / SAZM)
Sun 06:53:13 PM	-37.7109	-61.2558	↗ 35°	510.0	587.0	39000.0	Level	FlightAware ADS-B (TDL / SAZT)
Sun 06:53:43 PM	-37.6564	-61.2077	↗ 35°	509.0	586.0	39000.0	Level	FlightAware ADS-B (NEC / SAZO)
Sun 06:54:13 PM	-37.5981	-61.1564	↗ 35°	509.0	586.0	39000.0	Level	FlightAware ADS-B (NEC / SAZO)
Sun 06:54:46 PM	-37.5318	-61.0985	↗ 35°	509.0	586.0	39000.0	Level	FlightAware ADS-B (BHI / SAZB)
Sun 06:55:16 PM	-37.4726	-61.0468	↗ 35°	509.0	586.0	39000.0	Level	FlightAware ADS-B (BHI / SAZB)
Sun 06:55:46 PM	-37.4145	-60.9962	↗ 35°	510.0	587.0	39000.0	Level	FlightAware ADS-B (BHI / SAZB)
Sun 06:56:18 PM	-37.3559	-60.9452	↗ 35°	510.0	587.0	39000.0	Level	FlightAware ADS-B (GHU / SAAG)
Sun 06:56:48 PM	-37.2963	-60.8935	↗ 35°	510.0	587.0	39000.0	Level	FlightAware ADS-B (GHU / SAAG)
Sun 06:57:20 PM	-37.2335	-60.8391	↗ 35°	510.0	587.0	39000.0	Level	FlightAware ADS-B (TDL / SAZT)
Sun 06:57:52 PM	-37.1725	-60.7864	↗ 35°	510.0	587.0	39000.0	Level	FlightAware ADS-B (TDL / SAZT)
Sun 06:58:23 PM	-37.1129	-60.735	↗ 35°	510.0	587.0	39000.0	Level	FlightAware ADS-B (MDQ / SAZM)
Sun 06:58:53 PM	-37.0534	-60.6837	↗ 35°	511.0	588.0	39000.0	Level	FlightAware ADS-B (MDQ / SAZM)
Sun 06:59:23 PM	-36.9943	-60.633	↗ 35°	511.0	588.0	39000.0	Level	FlightAware ADS-B (TDL / SAZT)
Sun 06:59:53 PM	-36.9372	-60.5839	↗ 35°	512.0	589.0	39000.0	Level	FlightAware ADS-B (PEH / SAZP)
Sun 07:00:23 PM	-36.8793	-60.5344	↗ 35°	512.0	589.0	39000.0	Level	FlightAware ADS-B (PEH / SAZP)
Sun 07:00:53 PM	-36.8195	-60.4833	↗ 34°	513.0	590.0	39000.0	Level	FlightAware ADS-B (PEH / SAZP)
Sun 07:01:23 PM	-36.7606	-60.4331	↗ 34°	513.0	590.0	39000.0	Level	FlightAware ADS-B (PEH / SAZP)
Sun 07:01:53 PM	-36.7022	-60.3833	↗ 34°	512.0	589.0	39000.0	-467 Descending	FlightAware ADS-B (MDQ / SAZM)
Sun 07:02:24 PM	-36.641	-60.3314	↗ 34°	510.0	587.0	38525.0	-1,648 Descending	FlightAware ADS-B (SAZA)
Sun 07:02:54 PM	-36.5821	-60.2813	↗ 34°	509.0	586.0	37325.0	-2,475 Descending	FlightAware ADS-B (GHU / SAAG)
Sun 07:03:24 PM	-36.5234	-60.2317	↗ 34°	509.0	586.0	36050.0	-2,385 Descending	FlightAware ADS-B (SAZA)
Sun 07:03:55 PM	-36.4648	-60.1824	↗ 34°	506.0	582.0	34900.0	-2,066 Descending	FlightAware ADS-B (SADM)
Sun 07:04:25 PM	-36.4076	-60.1343	↗ 34°	497.0	572.0	33950.0	-1,875 Descending	FlightAware ADS-B (PEH / SAZP)
Sun 07:04:55 PM	-36.3516	-60.0876	↗ 34°	488.0	562.0	33025.0	-1,875 Descending	FlightAware ADS-B (SAZA)
Sun 07:05:25 PM	-36.2954	-60.0406	↗ 34°	479.0	551.0	32075.000000000004	-1,850 Descending	FlightAware ADS-B (PEH / SAZP)
Sun 07:05:55 PM	-36.241	-59.9952	↗ 34°	471.0	542.0	31175.0	-1,850 Descending	FlightAware ADS-B (SAZA)
Sun 07:06:25 PM	-36.1846	-59.9484	↗ 34°	465.0	535.0	30225.0	-1,900 Descending	FlightAware ADS-B (SAZI)
Sun 07:06:55 PM	-36.1309	-59.9038	↗ 34°	463.0	533.0	29275.0	-1,875 Descending	FlightAware ADS-B (SAZI)
Sun 07:07:25 PM	-36.0791	-59.8608	↗ 34°	457.0	526.0	28350.0	-1,850 Descending	FlightAware ADS-B (PEH / SAZP)
Sun 07:07:55 PM	-36.0278	-59.8183	↗ 34°	452.0	520.0	27425.0	-1,925 Descending	FlightAware ADS-B (MDQ / SAZM)
Sun 07:08:25 PM	-35.9724	-59.7724	↗ 34°	445.0	512.0	26425.0	-1,875 Descending	FlightAware ADS-B (SADM)
Sun 07:08:55 PM	-35.9239	-59.7323	↗ 34°	440.0	506.0	25550.0	-1,825 Descending	FlightAware ADS-B (JNI / SAAJ)
Sun 07:09:25 PM	-35.8718	-59.6893	↗ 34°	433.0	498.0	24600.0	-1,850 Descending	FlightAware ADS-B (SADM)
Sun 07:09:55 PM	-35.8218	-59.6483	↗ 34°	427.0	491.0	23700.0	-1,775 Descending	FlightAware ADS-B (SADM)
Sun 07:10:25 PM	-35.774	-59.6091	↗ 34°	420.0	483.0	22825.0	-1,550 Descending	FlightAware ADS-B (EPA / SADP)
Sun 07:10:55 PM	-35.725	-59.5688	↗ 34°	405.0	466.0	22150.0	-1,700 Descending	FlightAware ADS-B (SADM)
Sun 07:11:25 PM	-35.6799	-59.5318	↗ 34°	400.0	460.0	21125.0	-2,075 Descending	FlightAware ADS-B (MDQ / SAZM)
Sun 07:11:55 PM	-35.6356	-59.4955	↗ 34°	394.0	453.0	20075.0	-1,925 Descending	FlightAware ADS-B (JNI / SAAJ)
Sun 07:12:25 PM	-35.5901	-59.4584	↗ 34°	390.0	449.0	19200.0	-1,725 Descending	FlightAware ADS-B (JNI / SAAJ)
Sun 07:12:55 PM	-35.545	-59.4218	↗ 34°	386.0	444.0	18350.0	-1,700 Descending	FlightAware ADS-B (JNI / SAAJ)
Sun 07:13:25 PM	-35.5003	-59.3852	↗ 34°	381.0	438.0	17500.0	-1,650 Descending	FlightAware ADS-B (JNI / SAAJ)
Sun 07:13:55 PM	-35.4572	-59.3499	↗ 34°	374.0	430.0	16700.0	-1,642 Descending	FlightAware ADS-B (JNI / SAAJ)
Sun 07:14:18 PM	-35.4223	-59.3229	↗ 31°	370.0	426.0	16050.0	-1,694 Descending	FlightAware ADS-B (EPA / SADP)
Sun 07:14:49 PM	-35.3765	-59.2897	↗ 31°	364.0	419.0	15175.0	-1,648 Descending	FlightAware ADS-B (EPA / SADP)
Sun 07:15:19 PM	-35.3338	-59.2584	↗ 31°	358.0	412.0	14375.0	-1,575 Descending	FlightAware ADS-B (EPA / SADP)
Sun 07:15:49 PM	-35.2919	-59.2274	↗ 31°	352.0	405.0	13600.0	-1,650 Descending	FlightAware ADS-B (EPA / SADP)
Sun 07:16:19 PM	-35.25	-59.1961	↗ 32°	340.0	391.0	12725.0	-1,426 Descending	FlightAware ADS-B (EPA / SADP)
Sun 07:16:50 PM	-35.2129	-59.1683	↗ 31°	293.0	337.0	12150.0	-1,131 Descending	FlightAware ADS-B (EPA / SADP)
Sun 07:17:20 PM	-35.1791	-59.1456	↗ 27°	258.0	297.0	11575.0	-1,075 Descending	FlightAware ADS-B (EPA / SADP)
Sun 07:17:50 PM	-35.1479	-59.1259	↗ 27°	247.0	284.0	11075.0	-1,053 Descending	FlightAware ADS-B (EPA / SADP)
Sun 07:18:07 PM	-35.1288	-59.1163	↑ 13°	239.0	275.0	10750.0	-951 Descending	FlightAware ADS-B (EPA / SADP)
Sun 07:18:31 PM	-35.103	-59.1162	↑ 356°	242.0	278.0	10425.0	-853 Descending	FlightAware ADS-B (ROS / SAAR)
Sun 07:18:58 PM	-35.0723	-59.1202	↑ 348°	241.0	277.0	10025.0	-796 Descending	FlightAware ADS-B (EPA / SADP)
Sun 07:19:20 PM	-35.0501	-59.1285	↑ 342°	240.0	276.0	9775.0	-698 Descending	FlightAware ADS-B (FDO / SADF)
Sun 07:19:41 PM	-35.0283	-59.1377	↑ 342°	240.0	276.0	9525.0	-622 Descending	FlightAware ADS-B (EPA / SADP)
Sun 07:20:01 PM	-35.0067	-59.147	↑ 342°	239.0	275.0	9350.0	-630 Descending	FlightAware ADS-B (EPA / SADP)
Sun 07:20:31 PM	-34.9754	-59.1601	↑ 342°	238.0	274.0	9000.0	-690 Descending	FlightAware ADS-B (EPA / SADP)
Sun 07:20:51 PM	-34.9537	-59.169	↑ 342°	239.0	275.0	8775.0	-667 Descending	FlightAware ADS-B (EPA / SADP)
Sun 07:21:16 PM	-34.9273	-59.1797	↑ 342°	239.0	275.0	8500.0	-663 Descending	FlightAware ADS-B (SADM)
Sun 07:21:34 PM	-34.9085	-59.1873	↑ 342°	236.0	272.0	8300.0	-643 Descending	FlightAware ADS-B (GHU / SAAG)
Sun 07:21:51 PM	-34.8918	-59.1939	↑ 342°	235.0	270.0	8125.0	-514 Descending	FlightAware ADS-B (EPA / SADP)
Sun 07:22:09 PM	-34.8709	-59.1975	↑ 3°	238.0	274.0	8000.0	-221 Descending	FlightAware ADS-B (SADM)
Sun 07:22:25 PM	-34.8544	-59.1895	↗ 34°	244.0	281.0	8000.0	45 Climbing	FlightAware ADS-B (BUE / SABA)
Sun 07:22:42 PM	-34.8435	-59.1725	↗ 63°	244.0	281.0	8025.0	-41 Descending	FlightAware ADS-B (AEP / SABE)
Sun 07:23:02 PM	-34.8355	-59.1479	→ 70°	245.0	282.0	7975.0	-660 Descending	FlightAware ADS-B (LPG / SADL)
Sun 07:23:32 PM	-34.8234	-59.1065	→ 71°	236.0	272.0	7475.0	-625 Descending	FlightAware ADS-B (EPA / SADP)
Sun 07:24:02 PM	-34.8137	-59.0727	→ 71°	211.0	243.0	7350.0	-525 Descending	FlightAware ADS-B (BUE / SABA)
Sun 07:24:32 PM	-34.8039	-59.0398	→ 70°	199.0	229.0	6950.0	-850 Descending	FlightAware ADS-B (EPA / SADP)
Sun 07:25:02 PM	-34.7944	-59.0089	→ 70°	198.0	228.0	6500.0	-850 Descending	FlightAware ADS-B (LPG / SADL)
Sun 07:25:32 PM	-34.7848	-58.9779	→ 69°	196.0	226.0	6100.0	-825 Descending	FlightAware ADS-B (GHU / SAAG)
Sun 07:26:02 PM	-34.7753	-58.9471	→ 70°	194.0	223.0	5675.0	-850 Descending	FlightAware ADS-B (GHU / SAAG)
Sun 07:26:32 PM	-34.7657	-58.9153	→ 70°	194.0	223.0	5250.0	-862 Descending	FlightAware ADS-B (SADM)
Sun 07:26:49 PM	-34.7616	-58.8972	→ 81°	195.0	224.0	5000.0	-800 Descending	FlightAware ADS-B (BUE / SABA)
Sun 07:27:17 PM	-34.7655	-58.8679	→ 99°	195.0	224.0	4650.0	-720 Descending	FlightAware ADS-B (LPG / SADL)
Sun 07:27:39 PM	-34.769	-58.8431	→ 99°	193.0	222.0	4400.0	-690 Descending	FlightAware ADS-B (AEP / SABE)
Sun 07:28:07 PM	-34.7727	-58.8122	→ 99°	192.0	221.0	4075.0	-656 Descending	FlightAware ADS-B (SADM)
Sun 07:28:27 PM	-34.776	-58.7925	→ 102°	192.0	221.0	3875.0	-810 Descending	FlightAware ADS-B (GHU / SAAG)
Sun 07:28:57 PM	-34.7817	-58.7609	→ 102°	192.0	221.0	3400.0	-975 Descending	FlightAware ADS-B (GHU / SAAG)
Sun 07:29:27 PM	-34.7877	-58.7279	→ 102°	191.0	220.0	2900.0	-1,025 Descending	FlightAware ADS-B (SADM)
Sun 07:29:57 PM	-34.7933	-58.6964	→ 102°	188.0	216.0	2375.0	-950 Descending	FlightAware ADS-B (SADM)
Sun 07:30:27 PM	-34.7987	-58.6668	→ 102°	169.0	194.0	1950.0	-836 Descending	FlightAware ADS-B (SADM)
Sun 07:30:58 PM	-34.8034	-58.6404	→ 102°	146.0	168.0	1525.0	-766 Descending	FlightAware ADS-B (SADM)
Sun 07:31:14 PM	-34.8057	-58.6282	→ 102°	141.0	162.0	1350.0	-686 Descending	FlightAware ADS-B (EPA / SADP)
Sun 07:31:33 PM	-34.8082	-58.6138	→ 102°	141.0	162.0	1125.0	-643 Descending	FlightAware ADS-B (EPA / SADP)
Sun 07:31:49 PM	-34.8107	-58.6002	→ 102°	145.0	167.0	975.0	-727 Descending	FlightAware ADS-B (EPA / SADP)
Sun 07:32:06 PM	-34.813	-58.5872	→ 102°	144.0	166.0	725.0	-750 Descending	FlightAware ADS-B (FDO / SADF)
Sun 07:32:23 PM	-34.8154	-58.5739	→ 102°	143.0	165.0	550.0	-618 Descending	FlightAware ADS-B (EPA / SADP)
