# Supplementary material for: TrackMatcher – a tool for finding intercepts in tracks of geographical positions
Source: Copernicus journal article supplement (doi:10.5194/gmd-15-7557-2022), 2022-10-18
Supplement: Supplementary file 1 [file gmd-15-7557-2022-supplement.zip › ESM/example/data/flights/ANZ31_27-JAN-2019_SAEZ-NZAA.dat]

Time (CET)	Latitude	Longitude	Course	kts	mph	feet	Rate	Reporting Facility
Sun 04:27:59 AM	-34.8271	-58.5076	→ 103°	179.0	206.0	900.0	Level	FlightAware ADS-B (EPA / SADP)
Sun 04:28:16 AM	-34.835	-58.4922	↘ 140°	182.0	209.0	1700.0	1,909 Climbing	FlightAware ADS-B (LPG / SADL)
Sun 04:28:32 AM	-34.8459	-58.4825	↘ 142°	193.0	222.0	1950.0	864 Climbing	FlightAware ADS-B (EPA / SADP)
Sun 04:28:49 AM	-34.8558	-58.4669	↘ 122°	205.0	236.0	2175.0	733 Climbing	FlightAware ADS-B (LPG / SADL)
Sun 04:29:17 AM	-34.8699	-58.4371	↘ 119°	234.0	269.0	2500.0	873 Climbing	FlightAware ADS-B (LPG / SADL)
Sun 04:29:44 AM	-34.8852	-58.4025	↘ 119°	256.0	295.0	2975.0	1,133 Climbing	FlightAware ADS-B (LPG / SADL)
Sun 04:30:02 AM	-34.8996	-58.3851	↘ 152°	263.0	303.0	3350.0	1,542 Climbing	FlightAware ADS-B (LPG / SADL)
Sun 04:30:20 AM	-34.9233	-58.3808	↓ 185°	277.0	319.0	3900.0	1,676 Climbing	FlightAware ADS-B (SADM)
Sun 04:30:36 AM	-34.9418	-58.3903	↙ 217°	287.0	330.0	4300.0	1,346 Climbing	FlightAware ADS-B (LPG / SADL)
Sun 04:30:59 AM	-34.9613	-58.4183	↙ 234°	291.0	335.0	4775.0	1,171 Climbing	FlightAware ADS-B (LPG / SADL)
Sun 04:31:17 AM	-34.9745	-58.4457	↙ 245°	294.0	338.0	5100.0	1,105 Climbing	FlightAware ADS-B (EPA / SADP)
Sun 04:31:37 AM	-34.9843	-58.4774	← 254°	297.0	342.0	5475.0	1,125 Climbing	FlightAware ADS-B (EPA / SADP)
Sun 04:31:53 AM	-34.9889	-58.5037	← 262°	298.0	343.0	5775.0	1,078 Climbing	FlightAware ADS-B (EPA / SADP)
Sun 04:32:09 AM	-34.9927	-58.5271	← 254°	301.0	346.0	6050.0	1,000 Climbing	FlightAware ADS-B (EPA / SADP)
Sun 04:32:26 AM	-35.0045	-58.5506	↙ 225°	300.0	345.0	6325.0	1,125 Climbing	FlightAware ADS-B (EPA / SADP)
Sun 04:32:45 AM	-35.0276	-58.5713	↙ 213°	298.0	343.0	6725.0	1,192 Climbing	FlightAware ADS-B (AEP / SABE)
Sun 04:33:05 AM	-35.0497	-58.5886	↙ 213°	298.0	343.0	7100.0	1,269 Climbing	FlightAware ADS-B (LPG / SADL)
Sun 04:33:24 AM	-35.0731	-58.6075	↙ 214°	298.0	343.0	7550.0	1,286 Climbing	FlightAware ADS-B (FDO / SADF)
Sun 04:33:54 AM	-35.1071	-58.6349	↙ 214°	298.0	343.0	8150.0	1,125 Climbing	FlightAware ADS-B (EPA / SADP)
Sun 04:34:12 AM	-35.1279	-58.6518	↙ 214°	300.0	345.0	8450.0	1,050 Climbing	FlightAware ADS-B (AEP / SABE)
Sun 04:34:34 AM	-35.154	-58.673	↙ 215°	301.0	346.0	8850.0	1,098 Climbing	FlightAware ADS-B (EPA / SADP)
Sun 04:34:53 AM	-35.1763	-58.6912	↙ 215°	302.0	348.0	9200.0	1,200 Climbing	FlightAware ADS-B (EPA / SADP)
Sun 04:35:14 AM	-35.2009	-58.711	↙ 213°	301.0	346.0	9650.0	977 Climbing	FlightAware ADS-B (LPG / SADL)
Sun 04:35:59 AM	-35.2533	-58.7525	↙ 213°	309.0	356.0	10275.0	705 Climbing	FlightAware ADS-B (LPG / SADL)
Sun 04:36:20 AM	-35.2782	-58.7719	↙ 214°	317.0	365.0	10425.0	500 Climbing	FlightAware ADS-B (LPG / SADL)
Sun 04:36:50 AM	-35.3162	-58.8014	↙ 212°	330.0	380.0	10700.0	575 Climbing	FlightAware ADS-B (LPG / SADL)
Sun 04:37:20 AM	-35.3564	-58.8325	↙ 212°	343.0	395.0	11000.0	600 Climbing	FlightAware ADS-B (EPA / SADP)
Sun 04:37:50 AM	-35.3974	-58.8639	↙ 212°	354.0	407.0	11300.0	625 Climbing	FlightAware ADS-B (SADM)
Sun 04:38:20 AM	-35.4395	-58.8961	↙ 212°	365.0	420.0	11625.0	575 Climbing	FlightAware ADS-B (SADM)
Sun 04:38:50 AM	-35.4846	-58.9309	↙ 213°	376.0	433.0	11875.0	575 Climbing	FlightAware ADS-B (EPA / SADP)
Sun 04:39:20 AM	-35.5293	-58.9654	↙ 213°	386.0	444.0	12200.0	827 Climbing	FlightAware ADS-B (LPG / SADL)
Sun 04:39:39 AM	-35.5605	-58.9898	↙ 213°	388.0	447.0	12550.0	1,115 Climbing	FlightAware ADS-B (EPA / SADP)
Sun 04:39:59 AM	-35.5856	-59.0187	↙ 230°	390.0	449.0	12925.0	1,163 Climbing	FlightAware ADS-B (EPA / SADP)
Sun 04:40:19 AM	-35.6039	-59.0537	↙ 243°	394.0	453.0	13325.0	1,170 Climbing	FlightAware ADS-B (EPA / SADP)
Sun 04:40:49 AM	-35.6306	-59.1162	↙ 243°	396.0	456.0	13900.0	1,225 Climbing	FlightAware ADS-B (SADM)
Sun 04:41:19 AM	-35.6555	-59.1756	↙ 243°	396.0	456.0	14550.0	1,271 Climbing	FlightAware ADS-B (EZE / SAEZ)
Sun 04:41:48 AM	-35.6799	-59.2341	↙ 243°	399.0	459.0	15150.0	1,394 Climbing	FlightAware ADS-B (EZE / SAEZ)
Sun 04:42:30 AM	-35.7141	-59.3203	← 247°	396.0	456.0	16200.0	1,476 Climbing	FlightAware ADS-B (EPA / SADP)
Sun 04:42:50 AM	-35.7288	-59.3615	← 248°	396.0	456.0	16675.0	1,297 Climbing	FlightAware ADS-B (EPA / SADP)
Sun 04:43:07 AM	-35.7411	-59.3978	← 249°	396.0	456.0	17000.0	1,313 Climbing	FlightAware ADS-B (EPA / SADP)
Sun 04:43:38 AM	-35.7624	-59.4629	← 248°	397.0	457.0	17725.0	1,230 Climbing	FlightAware ADS-B (GHU / SAAG)
Sun 04:44:08 AM	-35.7828	-59.5264	← 248°	399.0	459.0	18250.0	1,008 Climbing	FlightAware ADS-B (GHU / SAAG)
Sun 04:44:39 AM	-35.8035	-59.5902	← 248°	402.0	463.0	18750.0	885 Climbing	FlightAware ADS-B (GHU / SAAG)
Sun 04:45:09 AM	-35.8245	-59.6555	← 248°	408.0	470.0	19150.0	875 Climbing	FlightAware ADS-B (GHU / SAAG)
Sun 04:45:39 AM	-35.8456	-59.7204	← 248°	412.0	474.0	19625.0	900 Climbing	FlightAware ADS-B (SADM)
Sun 04:46:09 AM	-35.8662	-59.7839	← 249°	416.0	479.0	20050.0	850 Climbing	FlightAware ADS-B (EPA / SADP)
Sun 04:46:39 AM	-35.8885	-59.8525	← 248°	423.0	487.0	20475.0	900 Climbing	FlightAware ADS-B (SADM)
Sun 04:47:09 AM	-35.9106	-59.9207	← 248°	426.0	490.0	20950.0	950 Climbing	FlightAware ADS-B (SADM)
Sun 04:47:39 AM	-35.9329	-59.9896	← 248°	429.0	494.0	21425.0	925 Climbing	FlightAware ADS-B (SADM)
Sun 04:48:09 AM	-35.954	-60.0554	← 249°	433.0	498.0	21875.0	983 Climbing	FlightAware ADS-B (LPG / SADL)
Sun 04:48:37 AM	-35.9746	-60.1195	← 249°	434.0	499.0	22375.0	1,000 Climbing	FlightAware ADS-B (MDQ / SAZM)
Sun 04:49:03 AM	-35.9931	-60.1771	← 250°	437.0	503.0	22775.0	864 Climbing	FlightAware ADS-B (EPA / SADP)
Sun 04:49:43 AM	-36.024	-60.2741	← 250°	442.0	509.0	23325.0	825 Climbing	FlightAware ADS-B (EPA / SADP)
Sun 04:50:23 AM	-36.0545	-60.3696	← 249°	448.0	516.0	23875.0	847 Climbing	FlightAware ADS-B (GHU / SAAG)
Sun 04:50:45 AM	-36.071	-60.4216	← 249°	451.0	519.0	24200.0	919 Climbing	FlightAware ADS-B (SAZI)
Sun 04:51:25 AM	-36.1007	-60.5154	← 249°	453.0	521.0	24825.0	885 Climbing	FlightAware ADS-B (EZE / SAEZ)
Sun 04:51:46 AM	-36.117	-60.5666	← 249°	455.0	524.0	25100.0	912 Climbing	FlightAware ADS-B (SAZI)
Sun 04:52:16 AM	-36.1398	-60.6389	← 249°	455.0	524.0	25600.0	1,025 Climbing	FlightAware ADS-B (SAZI)
Sun 04:52:46 AM	-36.1627	-60.7119	← 249°	454.0	522.0	26125.0	1,075 Climbing	FlightAware ADS-B (SAZI)
Sun 04:53:16 AM	-36.1857	-60.7849	← 249°	452.0	520.0	26675.0	1,075 Climbing	FlightAware ADS-B (SAZI)
Sun 04:53:46 AM	-36.2085	-60.8577	← 249°	450.0	518.0	27200.0	950 Climbing	FlightAware ADS-B (PEH / SAZP)
Sun 04:54:16 AM	-36.2309	-60.9297	← 249°	450.0	518.0	27625.0	800 Climbing	FlightAware ADS-B (SAZI)
Sun 04:54:46 AM	-36.2534	-61.0019	← 249°	451.0	519.0	28000.0	375 Climbing	FlightAware ADS-B (SAZI)
Sun 04:55:16 AM	-36.2759	-61.0743	← 249°	448.0	516.0	28000.0	Level	FlightAware ADS-B (SADM)
Sun 04:55:46 AM	-36.2981	-61.1457	← 249°	446.0	513.0	28000.0	Level	FlightAware ADS-B (SAZI)
Sun 04:56:17 AM	-36.3207	-61.219	← 249°	446.0	513.0	28000.0	Level	FlightAware ADS-B (PEH / SAZP)
Sun 04:56:47 AM	-36.343	-61.2912	← 249°	447.0	514.0	28000.0	Level	FlightAware ADS-B (PEH / SAZP)
Sun 04:57:17 AM	-36.3651	-61.3631	← 249°	447.0	514.0	28000.0	Level	FlightAware ADS-B (PEH / SAZP)
Sun 04:57:47 AM	-36.3869	-61.4341	← 249°	448.0	516.0	28000.0	Level	FlightAware ADS-B (SAZI)
Sun 04:58:17 AM	-36.4093	-61.507	← 249°	449.0	517.0	28000.0	Level	FlightAware ADS-B (PEH / SAZP)
Sun 04:58:47 AM	-36.4308	-61.5777	← 249°	449.0	517.0	28000.0	Level	FlightAware ADS-B (SAZI)
Sun 04:59:17 AM	-36.4537	-61.6526	← 249°	449.0	517.0	28000.0	Level	FlightAware ADS-B (SADM)
Sun 04:59:47 AM	-36.4758	-61.7255	← 250°	448.0	516.0	28000.0	Level	FlightAware ADS-B (PEH / SAZP)
Sun 05:00:17 AM	-36.4978	-61.7981	← 250°	449.0	517.0	28000.0	Level	FlightAware ADS-B (PEH / SAZP)
Sun 05:00:47 AM	-36.5189	-61.8679	← 249°	450.0	518.0	28000.0	Level	FlightAware ADS-B (SAZI)
Sun 05:01:17 AM	-36.5407	-61.94	← 250°	450.0	518.0	28000.0	Level	FlightAware ADS-B (SAZI)
Sun 05:01:47 AM	-36.564	-62.0177	← 250°	450.0	518.0	28000.0	Level	FlightAware ADS-B (SADM)
Sun 05:02:18 AM	-36.5854	-62.0888	← 250°	449.0	517.0	28000.0	Level	FlightAware ADS-B (PEH / SAZP)
Sun 05:02:48 AM	-36.607	-62.1612	← 250°	449.0	517.0	28000.0	Level	FlightAware ADS-B (PEH / SAZP)
Sun 05:03:18 AM	-36.629	-62.2351	← 250°	449.0	517.0	28000.0	Level	FlightAware ADS-B (SADM)
Sun 05:03:48 AM	-36.6503	-62.3069	← 250°	448.0	516.0	28000.0	Level	FlightAware ADS-B (PEH / SAZP)
Sun 05:04:18 AM	-36.6722	-62.3804	← 250°	448.0	516.0	28000.0	Level	FlightAware ADS-B (PEH / SAZP)
Sun 05:04:48 AM	-36.6931	-62.4511	← 250°	448.0	516.0	28000.0	Level	FlightAware ADS-B (SADM)
Sun 05:05:18 AM	-36.7152	-62.5257	← 250°	447.0	514.0	28000.0	Level	FlightAware ADS-B (SADM)
Sun 05:05:50 AM	-36.7381	-62.6037	← 250°	447.0	514.0	28000.0	Level	FlightAware ADS-B (BHI / SAZB)
Sun 05:06:21 AM	-36.7603	-62.6793	← 250°	448.0	516.0	28000.0	Level	FlightAware ADS-B (BHI / SAZB)
Sun 05:07:05 AM	-36.7912	-62.7848	← 250°	447.0	514.0	28000.0	Level	FlightAware ADS-B (GPO / SAZG)
Sun 05:07:35 AM	-36.8121	-62.8564	← 250°	447.0	514.0	28000.0	Level	FlightAware ADS-B (GPO / SAZG)
Sun 05:08:05 AM	-36.8334	-62.9296	← 250°	445.0	512.0	28000.0	Level	FlightAware ADS-B (GPO / SAZG)
Sun 05:08:36 AM	-36.8546	-63.0027	← 250°	445.0	512.0	28000.0	Level	FlightAware ADS-B (GPO / SAZG)
Sun 05:09:06 AM	-36.8761	-63.077	← 250°	445.0	512.0	28000.0	Level	FlightAware ADS-B (GPO / SAZG)
Sun 05:09:36 AM	-36.8967	-63.1482	← 250°	445.0	512.0	28000.0	Level	FlightAware ADS-B (GPO / SAZG)
Sun 05:10:07 AM	-36.9179	-63.2221	← 250°	445.0	512.0	28000.0	Level	FlightAware ADS-B (BHI / SAZB)
Sun 05:10:37 AM	-36.9393	-63.2966	← 250°	446.0	513.0	28000.0	Level	FlightAware ADS-B (BHI / SAZB)
Sun 05:11:19 AM	-36.9678	-63.3964	← 251°	447.0	514.0	28000.0	Level	FlightAware ADS-B (PEH / SAZP)
Sun 05:11:50 AM	-36.9898	-63.4731	← 251°	447.0	514.0	28000.0	Level	FlightAware ADS-B (RSA / SAZR)
Sun 05:12:20 AM	-37.0107	-63.5468	← 251°	447.0	514.0	28000.0	Level	FlightAware ADS-B (RSA / SAZR)
Sun 05:12:50 AM	-37.0313	-63.6196	← 251°	446.0	513.0	28000.0	Level	FlightAware ADS-B (RSA / SAZR)
Sun 05:13:20 AM	-37.0523	-63.6936	← 251°	445.0	512.0	28000.0	Level	FlightAware ADS-B (RSA / SAZR)
Sun 05:13:55 AM	-37.0761	-63.7781	← 251°	444.0	511.0	28000.0	Level	FlightAware ADS-B (BHI / SAZB)
Sun 05:14:26 AM	-37.0977	-63.8549	← 251°	443.0	510.0	28000.0	Level	FlightAware ADS-B (BHI / SAZB)
Sun 05:14:56 AM	-37.1177	-63.9265	← 251°	443.0	510.0	28000.0	Level	FlightAware ADS-B (BHI / SAZB)
Sun 05:15:28 AM	-37.1386	-64.0011	← 251°	442.0	509.0	28000.0	Level	FlightAware ADS-B (BHI / SAZB)
Sun 05:16:05 AM	-37.1637	-64.0913	← 251°	443.0	510.0	28000.0	Level	FlightAware ADS-B (JNI / SAAJ)
Sun 05:16:36 AM	-37.1848	-64.167	← 251°	442.0	509.0	28000.0	Level	FlightAware ADS-B (GPO / SAZG)
Sun 05:17:06 AM	-37.2049	-64.2397	← 251°	443.0	510.0	28000.0	Level	FlightAware ADS-B (GPO / SAZG)
Sun 05:17:36 AM	-37.2253	-64.3135	← 251°	444.0	511.0	28000.0	Level	FlightAware ADS-B (GPO / SAZG)
Sun 05:18:16 AM	-37.252	-64.4106	← 251°	445.0	512.0	28000.0	Level	FlightAware ADS-B (RSA / SAZR)
Sun 05:18:46 AM	-37.2724	-64.4848	← 251°	446.0	513.0	28000.0	Level	FlightAware ADS-B (RSA / SAZR)
Sun 05:19:16 AM	-37.2928	-64.559	← 251°	447.0	514.0	28000.0	Level	FlightAware ADS-B (GPO / SAZG)
Sun 05:19:55 AM	-37.318	-64.6517	← 251°	447.0	514.0	28000.0	Level	FlightAware ADS-B (GPO / SAZG)
Sun 05:20:25 AM	-37.3389	-64.728	← 251°	447.0	514.0	28000.0	Level	FlightAware ADS-B (GPO / SAZG)
Sun 05:20:56 AM	-37.3599	-64.8055	← 251°	446.0	513.0	28000.0	Level	FlightAware ADS-B (BHI / SAZB)
Sun 05:21:43 AM	-37.3899	-64.9171	← 251°	443.0	510.0	28000.0	Level	FlightAware ADS-B (RSA / SAZR)
Sun 05:22:14 AM	-37.4103	-64.9925	← 251°	443.0	510.0	28000.0	Level	FlightAware ADS-B (RSA / SAZR)
Sun 05:22:52 AM	-37.4362	-65.089	← 251°	443.0	510.0	28000.0	Level	FlightAware ADS-B (BHI / SAZB)
Sun 05:23:35 AM	-37.4628	-65.1887	← 252°	445.0	512.0	28000.0	Level	FlightAware ADS-B (RSA / SAZR)
Sun 05:24:14 AM	-37.4888	-65.2862	← 252°	446.0	513.0	28000.0	Level	FlightAware ADS-B (RSA / SAZR)
Sun 05:24:46 AM	-37.5092	-65.3629	← 252°	446.0	513.0	28000.0	Level	FlightAware ADS-B (RSA / SAZR)
Sun 05:25:17 AM	-37.5297	-65.4405	← 252°	446.0	513.0	28000.0	Level	FlightAware ADS-B (RSA / SAZR)
Sun 05:26:17 AM	-37.569	-65.5896	← 252°	448.0	516.0	28000.0	15 Climbing	FlightAware ADS-B (RSA / SAZR)
Sun 05:26:57 AM	-37.5951	-65.6891	← 252°	448.0	516.0	28025.0	471 Climbing	FlightAware ADS-B (NQN / SAZN)
Sun 05:27:27 AM	-37.6149	-65.7648	← 252°	448.0	516.0	28550.0	984 Climbing	FlightAware ADS-B (NQN / SAZN)
Sun 05:27:58 AM	-37.6345	-65.8404	← 252°	449.0	517.0	29025.0	1,180 Climbing	FlightAware ADS-B (NQN / SAZN)
Sun 05:28:28 AM	-37.6542	-65.9161	← 252°	445.0	512.0	29750.0	731 Climbing	FlightAware ADS-B (NQN / SAZN)
Sun 05:29:18 AM	-37.686	-66.0391	← 252°	438.0	504.0	30000.0	188 Climbing	FlightAware ADS-B (NQN / SAZN)
Sun 05:29:48 AM	-37.7047	-66.1123	← 252°	437.0	503.0	30000.0	Level	FlightAware ADS-B (NQN / SAZN)
Sun 05:30:18 AM	-37.7233	-66.1845	← 252°	435.0	501.0	30000.0	Level	FlightAware ADS-B (NQN / SAZN)
Sun 05:30:53 AM	-37.7449	-66.2685	← 252°	434.0	499.0	30000.0	Level	FlightAware ADS-B (NQN / SAZN)
Sun 05:31:23 AM	-37.7634	-66.3411	← 252°	434.0	499.0	30000.0	Level	FlightAware ADS-B (NQN / SAZN)
Sun 05:31:53 AM	-37.7817	-66.4127	← 252°	434.0	499.0	30000.0	Level	FlightAware ADS-B (NQN / SAZN)
Sun 05:32:23 AM	-37.7998	-66.4841	← 252°	434.0	499.0	30000.0	Level	FlightAware ADS-B (NQN / SAZN)
Sun 05:32:53 AM	-37.8186	-66.5586	← 252°	435.0	501.0	30000.0	Level	FlightAware ADS-B (NQN / SAZN)
Sun 05:33:23 AM	-37.837	-66.6314	← 252°	436.0	502.0	30000.0	Level	FlightAware ADS-B (NQN / SAZN)
Sun 05:33:53 AM	-37.8556	-66.7049	← 253°	436.0	502.0	30000.0	Level	FlightAware ADS-B (NQN / SAZN)
Sun 05:34:23 AM	-37.8737	-66.7775	← 253°	436.0	502.0	30000.0	Level	FlightAware ADS-B (NQN / SAZN)
Sun 05:34:54 AM	-37.8919	-66.8502	← 253°	436.0	502.0	30000.0	Level	FlightAware ADS-B (NQN / SAZN)
Sun 05:35:24 AM	-37.9101	-66.9233	← 253°	436.0	502.0	30000.0	Level	FlightAware ADS-B (NQN / SAZN)
Sun 05:35:54 AM	-37.9285	-66.997	← 253°	436.0	502.0	30000.0	Level	FlightAware ADS-B (NQN / SAZN)
Sun 05:36:24 AM	-37.9467	-67.0707	← 253°	437.0	503.0	30000.0	Level	FlightAware ADS-B (NQN / SAZN)
Sun 05:36:54 AM	-37.9648	-67.1436	← 253°	438.0	504.0	30000.0	Level	FlightAware ADS-B (NQN / SAZN)
Sun 05:37:24 AM	-37.9831	-67.2181	← 253°	440.0	506.0	30000.0	Level	FlightAware ADS-B (NQN / SAZN)
Sun 05:37:54 AM	-38.0013	-67.2924	← 253°	442.0	509.0	30000.0	Level	FlightAware ADS-B (NQN / SAZN)
Sun 05:38:30 AM	-38.0229	-67.3803	← 253°	442.0	509.0	30000.0	Level	FlightAware ADS-B (NQN / SAZN)
Sun 05:39:00 AM	-38.041	-67.4548	← 253°	443.0	510.0	30000.0	Level	FlightAware ADS-B (NQN / SAZN)
Sun 05:39:30 AM	-38.0592	-67.5294	← 253°	444.0	511.0	30000.0	Level	FlightAware ADS-B (NQN / SAZN)
Sun 05:40:00 AM	-38.0774	-67.6042	← 253°	444.0	511.0	30000.0	Level	FlightAware ADS-B (NQN / SAZN)
Sun 05:40:34 AM	-38.0979	-67.6896	← 253°	444.0	511.0	30000.0	Level	FlightAware ADS-B (NQN / SAZN)
Sun 05:41:05 AM	-38.1162	-67.7654	← 253°	445.0	512.0	30000.0	Level	FlightAware ADS-B (NQN / SAZN)
Sun 05:41:35 AM	-38.1345	-67.8419	← 253°	444.0	511.0	30000.0	Level	FlightAware ADS-B (NQN / SAZN)
Sun 05:42:05 AM	-38.1526	-67.9172	← 253°	443.0	510.0	30000.0	Level	FlightAware ADS-B (NQN / SAZN)
Sun 05:42:35 AM	-38.1704	-67.9921	← 253°	442.0	509.0	30000.0	Level	FlightAware ADS-B (NQN / SAZN)
Sun 05:43:06 AM	-38.1879	-68.0656	← 253°	441.0	507.0	30000.0	Level	FlightAware ADS-B (NQN / SAZN)
Sun 05:43:36 AM	-38.2061	-68.142	← 253°	440.0	506.0	30000.0	Level	FlightAware ADS-B (NQN / SAZN)
Sun 05:44:17 AM	-38.2301	-68.2439	← 253°	441.0	507.0	30000.0	Level	FlightAware ADS-B (NQN / SAZN)
Sun 05:44:47 AM	-38.2475	-68.318	← 253°	442.0	509.0	30000.0	Level	FlightAware ADS-B (NQN / SAZN)
Sun 05:45:17 AM	-38.2653	-68.3937	← 253°	442.0	509.0	30000.0	Level	FlightAware ADS-B (NQN / SAZN)
Sun 05:45:47 AM	-38.2827	-68.4681	← 254°	442.0	509.0	30000.0	Level	FlightAware ADS-B (NQN / SAZN)
Sun 05:46:17 AM	-38.2999	-68.5417	← 254°	442.0	509.0	30000.0	Level	FlightAware ADS-B (NQN / SAZN)
Sun 05:46:47 AM	-38.3171	-68.6154	← 254°	441.0	507.0	30000.0	Level	FlightAware ADS-B (NQN / SAZN)
Sun 05:47:17 AM	-38.3348	-68.6921	← 254°	441.0	507.0	30000.0	Level	FlightAware ADS-B (NQN / SAZN)
Sun 05:47:47 AM	-38.3518	-68.7662	← 254°	439.0	505.0	30000.0	Level	FlightAware ADS-B (NQN / SAZN)
Sun 05:48:18 AM	-38.3685	-68.8387	← 254°	437.0	503.0	30000.0	Level	FlightAware ADS-B (NQN / SAZN)
Sun 05:48:48 AM	-38.3861	-68.9154	← 254°	437.0	503.0	30000.0	Level	FlightAware ADS-B (NQN / SAZN)
Sun 05:49:18 AM	-38.403	-68.9894	← 254°	437.0	503.0	30000.0	Level	FlightAware ADS-B (NQN / SAZN)
Sun 05:49:48 AM	-38.4194	-69.0613	← 254°	437.0	503.0	30000.0	Level	FlightAware ADS-B (NQN / SAZN)
Sun 05:50:18 AM	-38.4368	-69.138	← 254°	437.0	503.0	30000.0	Level	FlightAware ADS-B (NQN / SAZN)
Sun 05:50:58 AM	-38.4597	-69.2393	← 254°	438.0	504.0	30000.0	Level	FlightAware ADS-B (NQN / SAZN)
Sun 05:51:32 AM	-38.4789	-69.3245	← 254°	439.0	505.0	30000.0	Level	FlightAware ADS-B (NQN / SAZN)
Sun 05:52:18 AM	-38.5039	-69.4358	← 254°	439.0	505.0	30000.0	Level	FlightAware ADS-B (NQN / SAZN)
Sun 05:52:48 AM	-38.5206	-69.511	← 254°	438.0	504.0	30000.0	Level	FlightAware ADS-B (NQN / SAZN)
Sun 05:53:18 AM	-38.5373	-69.5856	← 254°	436.0	502.0	30000.0	Level	FlightAware ADS-B (NQN / SAZN)
Sun 05:53:54 AM	-38.5567	-69.6731	← 254°	435.0	501.0	30000.0	Level	FlightAware ADS-B (NQN / SAZN)
Sun 05:54:26 AM	-38.5745	-69.7539	← 254°	435.0	501.0	30000.0	Level	FlightAware ADS-B (NQN / SAZN)
Sun 05:54:58 AM	-38.5919	-69.8325	← 254°	435.0	501.0	30000.0	Level	FlightAware ADS-B (NQN / SAZN)
Sun 05:55:28 AM	-38.608	-69.906	← 254°	435.0	501.0	30000.0	Level	FlightAware ADS-B (SCGO)
Sun 05:55:59 AM	-38.6245	-69.9817	← 255°	435.0	501.0	30000.0	Level	FlightAware ADS-B (NQN / SAZN)
Sun 05:56:29 AM	-38.6406	-70.0555	← 255°	434.0	499.0	30000.0	Level	FlightAware ADS-B (SCGO)
Sun 05:57:03 AM	-38.6589	-70.1396	← 255°	434.0	499.0	30000.0	Level	FlightAware ADS-B (NQN / SAZN)
Sun 05:57:39 AM	-38.6785	-70.2304	← 255°	434.0	499.0	30000.0	Level	FlightAware ADS-B (NQN / SAZN)
Sun 05:58:13 AM	-38.6964	-70.3138	← 255°	434.0	499.0	30000.0	Level	FlightAware ADS-B (ZCO / SCTC)
Sun 05:58:51 AM	-38.7165	-70.4071	← 255°	431.0	496.0	30000.0	Level	FlightAware ADS-B (NQN / SAZN)
Sun 05:59:21 AM	-38.7321	-70.48	← 255°	431.0	496.0	30000.0	Level	FlightAware ADS-B (NQN / SAZN)
Sun 05:59:51 AM	-38.7479	-70.5539	← 255°	431.0	496.0	30000.0	Level	FlightAware ADS-B (NQN / SAZN)
Sun 06:00:22 AM	-38.7645	-70.6324	← 255°	430.0	495.0	30000.0	Level	FlightAware ADS-B (ZCO / SCTC)
Sun 06:00:52 AM	-38.7799	-70.705	← 255°	430.0	495.0	30000.0	Level	FlightAware ADS-B (ZCO / SCTC)
Sun 06:01:28 AM	-38.7983	-70.7924	← 255°	429.0	494.0	30000.0	Level	FlightAware ADS-B (ZCO / SCTC)
Sun 06:01:58 AM	-38.8138	-70.8663	← 255°	427.0	491.0	30000.0	Level	FlightAware ADS-B (ZCO / SCTC)
Sun 06:02:28 AM	-38.8291	-70.9395	← 255°	428.0	493.0	30000.0	Level	FlightAware ADS-B (ZCO / SCTC)
Sun 06:02:59 AM	-38.8446	-71.0139	← 255°	428.0	493.0	30000.0	Level	FlightAware ADS-B (ZCO / SCTC)
Sun 06:03:29 AM	-38.86	-71.0878	← 255°	428.0	493.0	30000.0	Level	FlightAware ADS-B (ZCO / SCTC)
Sun 06:03:59 AM	-38.8753	-71.1617	← 255°	428.0	493.0	30000.0	Level	FlightAware ADS-B (ZCO / SCTC)
Sun 06:04:29 AM	-38.8905	-71.2355	← 255°	428.0	493.0	30000.0	Level	FlightAware ADS-B (ZCO / SCTC)
Sun 06:04:59 AM	-38.9056	-71.309	← 255°	428.0	493.0	30000.0	Level	FlightAware ADS-B (ZCO / SCTC)
Sun 06:05:29 AM	-38.9208	-71.3831	← 256°	426.0	490.0	30000.0	Level	FlightAware ADS-B (ZCO / SCTC)
Sun 06:05:54 AM	-38.9291	-71.4478	← 265°	418.0	481.0	30000.0	Level	FlightAware ADS-B (CCP / SCIE)
Sun 06:06:24 AM	-38.9297	-71.5212	← 271°	414.0	476.0	30000.0	Level	FlightAware ADS-B (ZCO / SCTC)
Sun 06:06:59 AM	-38.9284	-71.6056	← 271°	414.0	476.0	30000.0	Level	FlightAware ADS-B (CCP / SCIE)
Sun 06:07:34 AM	-38.9281	-71.6933	← 268°	416.0	479.0	30000.0	Level	FlightAware ADS-B (ZCO / SCTC)
Sun 06:08:04 AM	-38.933	-71.7639	← 263°	419.0	482.0	30000.0	Level	FlightAware ADS-B (ZCO / SCTC)
Sun 06:08:35 AM	-38.9447	-71.8438	← 257°	424.0	488.0	30000.0	Level	FlightAware ADS-B (ZCO / SCTC)
Sun 06:09:05 AM	-38.9578	-71.9169	← 257°	422.0	486.0	30000.0	Level	FlightAware ADS-B (ZCO / SCTC)
Sun 06:09:35 AM	-38.9709	-71.9907	← 257°	421.0	484.0	30000.0	Level	FlightAware ADS-B (ZCO / SCTC)
Sun 06:10:05 AM	-38.9841	-72.0642	← 257°	422.0	486.0	30000.0	Level	FlightAware ADS-B (ZCO / SCTC)
Sun 06:10:35 AM	-38.9973	-72.1373	← 257°	421.0	484.0	30000.0	Level	FlightAware ADS-B (ZCO / SCTC)
Sun 06:11:05 AM	-39.0104	-72.21	← 257°	421.0	484.0	30000.0	Level	FlightAware ADS-B (ZCO / SCTC)
Sun 06:11:35 AM	-39.0231	-72.2834	← 258°	420.0	483.0	30000.0	Level	FlightAware ADS-B (ZCO / SCTC)
Sun 06:12:06 AM	-39.0347	-72.357	← 259°	419.0	482.0	30000.0	Level	FlightAware ADS-B (ZCO / SCTC)
Sun 06:12:36 AM	-39.0464	-72.4306	← 258°	419.0	482.0	30000.0	Level	FlightAware ADS-B (ZCO / SCTC)
Sun 06:13:06 AM	-39.058	-72.503	← 258°	419.0	482.0	30000.0	Level	FlightAware ADS-B (ZCO / SCTC)
Sun 06:13:36 AM	-39.0695	-72.5748	← 258°	419.0	482.0	30000.0	Level	FlightAware ADS-B (SCQP)
Sun 06:14:06 AM	-39.0813	-72.6493	← 259°	418.0	481.0	30000.0	Level	FlightAware ADS-B (ZCO / SCTC)
Sun 06:14:36 AM	-39.093	-72.7229	← 259°	419.0	482.0	30000.0	Level	FlightAware ADS-B (ZCO / SCTC)
Sun 06:15:06 AM	-39.1047	-72.797	← 259°	419.0	482.0	30000.0	Level	FlightAware ADS-B (ZCO / SCTC)
Sun 06:15:39 AM	-39.1176	-72.8793	← 259°	418.0	481.0	30000.0	281 Climbing	FlightAware ADS-B (ZCO / SCTC)
Sun 06:16:10 AM	-39.129	-72.9521	← 259°	419.0	482.0	30300.0	871 Climbing	FlightAware ADS-B (SCGO)
Sun 06:16:41 AM	-39.1408	-73.0278	← 259°	418.0	481.0	30900.0	1,065 Climbing	FlightAware ADS-B (SCGO)
Sun 06:17:12 AM	-39.1522	-73.1018	← 259°	417.0	480.0	31400.0	959 Climbing	FlightAware ADS-B (YAI / SCCH)
Sun 06:17:42 AM	-39.1636	-73.1759	← 259°	417.0	480.0	31875.0	529 Climbing	FlightAware ADS-B (ZCO / SCTC)
Sun 06:18:20 AM	-39.1776	-73.2668	← 259°	416.0	479.0	32000.0	110 Climbing	FlightAware ADS-B (SCQP)
Sun 06:18:50 AM	-39.1885	-73.3387	← 259°	416.0	479.0	32000.0	Level	FlightAware ADS-B (SCQP)
Sun 06:19:20 AM	-39.1997	-73.4125	← 259°	416.0	479.0	32000.0	Level	FlightAware ADS-B (SCQP)
Sun 06:19:51 AM	-39.2109	-73.4866	← 259°	417.0	480.0	32000.0	Level	FlightAware ADS-B (SCQP)
Sun 06:20:21 AM	-39.2221	-73.561	← 259°	416.0	479.0	32000.0	Level	FlightAware ADS-B (SCQP)
Sun 06:20:52 AM	-39.2332	-73.6358	← 259°	417.0	480.0	32000.0	Level	FlightAware ADS-B (YAI / SCCH)
Sun 06:21:32 AM	-39.2481	-73.7349	← 259°	417.0	480.0	32000.0	Level	FlightAware ADS-B (CCP / SCIE)
Sun 06:22:02 AM	-39.2591	-73.8092	← 259°	418.0	481.0	32000.0	Level	FlightAware ADS-B (CCP / SCIE)
Sun 06:22:32 AM	-39.2702	-73.8847	← 259°	419.0	482.0	32000.0	Level	FlightAware ADS-B (ZCO / SCTC)
Sun 06:23:02 AM	-39.2811	-73.9587	← 259°	420.0	483.0	32000.0	Level	FlightAware ADS-B (ZCO / SCTC)
Sun 06:23:32 AM	-39.2919	-74.0326	← 260°	422.0	486.0	32000.0	Level	FlightAware ADS-B (ZCO / SCTC)
Sun 06:24:02 AM	-39.3027	-74.107	← 259°	423.0	487.0	32000.0	Level	FlightAware ADS-B (ZCO / SCTC)
Sun 06:24:40 AM	-39.316	-74.1987	← 260°	425.0	489.0	32000.0	Level	FlightAware ADS-B (CCP / SCIE)
Sun 06:25:24 AM	-39.3315	-74.3075	← 260°	427.0	491.0	32000.0	Level	FlightAware ADS-B (CCP / SCIE)
Sun 06:25:54 AM	-39.3423	-74.3829	← 260°	427.0	491.0	32000.0	Level	FlightAware ADS-B (CCP / SCIE)
Sun 06:26:24 AM	-39.353	-74.4578	← 260°	427.0	491.0	32000.0	Level	FlightAware ADS-B (CCP / SCIE)
Sun 06:26:54 AM	-39.3637	-74.5335	← 260°	428.0	493.0	32000.0	Level	FlightAware ADS-B (CCP / SCIE)
Sun 06:27:24 AM	-39.3744	-74.6067	← 260°	428.0	493.0	32000.0	Level	FlightAware ADS-B (CCP / SCIE)
Sun 06:28:04 AM	-39.3884	-74.7095	← 260°	430.0	495.0	32000.0	Level	FlightAware ADS-B (ZCO / SCTC)
Sun 06:28:34 AM	-39.3989	-74.7849	← 260°	431.0	496.0	32000.0	Level	FlightAware ADS-B (ZCO / SCTC)
Sun 06:29:04 AM	-39.4094	-74.8611	← 260°	431.0	496.0	32000.0	Level	FlightAware ADS-B (ZCO / SCTC)
Sun 06:29:34 AM	-39.42	-74.9379	← 260°	432.0	497.0	32000.0	Level	FlightAware ADS-B (ZCO / SCTC)
Sun 06:30:04 AM	-39.4304	-75.0135	← 260°	434.0	499.0	32000.0	Level	FlightAware ADS-B (ZCO / SCTC)
Sun 06:30:34 AM	-39.4409	-75.0899	← 260°	435.0	501.0	32000.0	Level	FlightAware ADS-B (CCP / SCIE)
Sun 06:31:04 AM	-39.4513	-75.1668	← 260°	435.0	501.0	32000.0	Level	FlightAware ADS-B (ZCO / SCTC)
Sun 06:31:34 AM	-39.4618	-75.2445	← 260°	436.0	502.0	32000.0	Level	FlightAware ADS-B (ZCO / SCTC)
Sun 06:32:04 AM	-39.472	-75.3209	← 260°	436.0	502.0	32000.0	Level	FlightAware ADS-B (ZCO / SCTC)
Sun 06:32:34 AM	-39.4825	-75.3988	← 260°	436.0	502.0	32000.0	Level	FlightAware ADS-B (ZCO / SCTC)
Sun 06:33:04 AM	-39.4927	-75.476	← 260°	437.0	503.0	32000.0	Level	FlightAware ADS-B (ZCO / SCTC)
Sun 06:33:34 AM	-39.5028	-75.5532	← 260°	438.0	504.0	32000.0	Level	FlightAware ADS-B (ZCO / SCTC)
Sun 06:34:04 AM	-39.5129	-75.6299	← 260°	439.0	505.0	32000.0	Level	FlightAware ADS-B (ZCO / SCTC)
Sun 06:34:34 AM	-39.5232	-75.7076	← 260°	439.0	505.0	32000.0	Level	FlightAware ADS-B (ZCO / SCTC)
Sun 06:35:04 AM	-39.5332	-75.7847	← 261°	440.0	506.0	32000.0	Level	FlightAware ADS-B (ZCO / SCTC)
Sun 06:35:34 AM	-39.5434	-75.8633	← 261°	442.0	509.0	32000.0	Level	FlightAware ADS-B (ZCO / SCTC)
Sun 06:36:08 AM	-39.5547	-75.9513	← 261°	444.0	511.0	32000.0	Level	FlightAware ADS-B (CCP / SCIE)
Sun 06:36:40 AM	-39.5657	-76.0373	← 261°	446.0	513.0	32000.0	Level	FlightAware ADS-B (ZCO / SCTC)
Sun 06:37:10 AM	-39.5758	-76.1163	← 261°	449.0	517.0	32000.0	Level	FlightAware ADS-B (ZCO / SCTC)
Sun 06:38:08 AM	-39.5954	-76.2723	← 261°	452.0	520.0	32000.0	Level	FlightAware ADS-B (ZCO / SCTC)
Sun 06:42:33 AM	-39.6836	-76.9944	← 261°	463.0	533.0	32000.0	Level	FlightAware ADS-B (ZCO / SCTC)
Sun 04:35:39 PM	-38.0188	-177.7612	← 291°	521.0	600.0	36000.0	Level	FlightAware ADS-B
Sun 04:41:12 PM	-37.7342	-178.7051	← 291°	518.0	596.0	36000.0	Level	FlightAware ADS-B
Sun 04:42:17 PM	-37.6785	-178.8863	← 291°	517.0	595.0	36000.0	Level	FlightAware ADS-B
Sun 04:43:19 PM	-37.6242	-179.0617	← 291°	517.0	595.0	36000.0	Level	FlightAware ADS-B
Sun 04:44:20 PM	-37.5712	-179.2319	← 291°	518.0	596.0	36000.0	Level	FlightAware ADS-B
Sun 04:45:20 PM	-37.5183	-179.4007	← 292°	518.0	596.0	36000.0	Level	FlightAware ADS-B
Sun 04:46:13 PM	-37.4719	-179.5479	← 292°	518.0	596.0	36000.0	Level	FlightAware ADS-B (NPE / NZNR)
Sun 04:46:49 PM	-37.4394	-179.6504	← 292°	518.0	596.0	36000.0	Level	FlightAware ADS-B (NPE / NZNR)
Sun 04:47:20 PM	-37.4122	-179.736	← 292°	518.0	596.0	36000.0	Level	FlightAware ADS-B
Sun 04:48:10 PM	-37.3677	-179.8758	← 292°	517.0	595.0	36000.0	Level	FlightAware ADS-B (NPE / NZNR)
Sun 04:48:40 PM	-37.3407	-179.9598	← 292°	517.0	595.0	36000.0	Level	FlightAware ADS-B (NPE / NZNR)
Sun 04:49:10 PM	-37.3145	179.9584	← 292°	517.0	595.0	36000.0	Level	FlightAware ADS-B (NPE / NZNR)
Sun 04:49:56 PM	-37.2725	179.8283	← 292°	516.0	594.0	36000.0	Level	FlightAware ADS-B (NZTN)
Sun 04:50:27 PM	-37.2438	179.7394	← 292°	516.0	594.0	36000.0	Level	FlightAware ADS-B (NZTN)
Sun 04:51:01 PM	-37.2142	179.6484	← 292°	517.0	595.0	36000.0	Level	FlightAware ADS-B (TRG / NZTG)
Sun 04:51:36 PM	-37.1837	179.5548	← 292°	517.0	595.0	36000.0	Level	FlightAware ADS-B (TRG / NZTG)
Sun 04:52:06 PM	-37.1559	179.4695	← 292°	517.0	595.0	36000.0	Level	FlightAware ADS-B (NPE / NZNR)
Sun 04:52:39 PM	-37.1251	179.3753	← 292°	518.0	596.0	36000.0	Level	FlightAware ADS-B (NZTN)
Sun 04:53:11 PM	-37.0972	179.2904	← 292°	518.0	596.0	36000.0	Level	FlightAware ADS-B (NPE / NZNR)
Sun 04:53:41 PM	-37.0745	179.2218	← 293°	517.0	595.0	36000.0	Level	FlightAware ADS-B (AKL / NZAA)
Sun 04:54:15 PM	-37.0478	179.1408	← 293°	517.0	595.0	36000.0	Level	FlightAware ADS-B (AKL / NZAA)
Sun 04:54:45 PM	-37.0116	179.0309	← 292°	517.0	595.0	36000.0	Level	FlightAware ADS-B (AKL / NZAA)
Sun 04:55:09 PM	-36.9965	178.9633	← 282°	512.0	589.0	36000.0	Level	FlightAware ADS-B (TRG / NZTG)
Sun 04:55:58 PM	-36.991	178.8172	← 270°	506.0	582.0	36000.0	Level	FlightAware ADS-B (TRG / NZTG)
Sun 04:56:31 PM	-36.9911	178.7231	← 270°	507.0	583.0	36000.0	Level	FlightAware ADS-B (NZRW)
Sun 04:57:01 PM	-36.9912	178.6338	← 270°	506.0	582.0	36000.0	Level	FlightAware ADS-B (NZRW)
Sun 04:57:34 PM	-36.9913	178.5385	← 270°	506.0	582.0	36000.0	Level	FlightAware ADS-B (TUO / NZAP)
Sun 04:58:06 PM	-36.9913	178.4402	← 270°	506.0	582.0	36000.0	Level	FlightAware ADS-B (NPE / NZNR)
Sun 04:58:36 PM	-36.9913	178.3522	← 270°	506.0	582.0	36000.0	Level	FlightAware ADS-B (NPE / NZNR)
Sun 04:59:06 PM	-36.9913	178.2649	← 270°	506.0	582.0	36000.0	Level	FlightAware ADS-B (NPE / NZNR)
Sun 04:59:39 PM	-36.991	178.1726	← 270°	506.0	582.0	36000.0	Level	FlightAware ADS-B (TRG / NZTG)
Sun 05:00:09 PM	-36.9908	178.0852	← 270°	506.0	582.0	36000.0	Level	FlightAware ADS-B (TUO / NZAP)
Sun 05:00:39 PM	-36.9905	177.9968	← 270°	506.0	582.0	36000.0	Level	FlightAware ADS-B (TRG / NZTG)
Sun 05:01:09 PM	-36.9901	177.9087	← 270°	507.0	583.0	36000.0	Level	FlightAware ADS-B (TRG / NZTG)
Sun 05:01:39 PM	-36.9896	177.8214	← 270°	507.0	583.0	36000.0	Level	FlightAware ADS-B (TRG / NZTG)
Sun 05:02:09 PM	-36.9892	177.7334	← 270°	507.0	583.0	36000.0	Level	FlightAware ADS-B (TRG / NZTG)
Sun 05:02:39 PM	-36.9885	177.6443	← 271°	507.0	583.0	36000.0	Level	FlightAware ADS-B (TRG / NZTG)
Sun 05:03:09 PM	-36.9879	177.5564	← 271°	506.0	582.0	36000.0	Level	FlightAware ADS-B (TRG / NZTG)
Sun 05:03:39 PM	-36.9873	177.4685	← 271°	505.0	581.0	36000.0	-231 Descending	FlightAware ADS-B (TRG / NZTG)
Sun 05:04:01 PM	-36.9867	177.4071	← 272°	505.0	581.0	35800.0	-1,171 Descending	FlightAware ADS-B (NPE / NZNR)
Sun 05:04:20 PM	-36.9862	177.3498	← 272°	501.0	577.0	35200.0	-2,269 Descending	FlightAware ADS-B (NPE / NZNR)
Sun 05:04:40 PM	-36.9856	177.2928	← 272°	502.0	578.0	34325.0	-2,756 Descending	FlightAware ADS-B (NZME)
Sun 05:05:03 PM	-36.985	177.2266	← 272°	503.0	579.0	33225.0	-2,756 Descending	FlightAware ADS-B (AKL / NZAA)
Sun 05:05:23 PM	-36.9844	177.1703	← 272°	503.0	579.0	32350.0	-2,738 Descending	FlightAware ADS-B (AKL / NZAA)
Sun 05:05:43 PM	-36.9838	177.111	← 272°	504.0	580.0	31400.0	-3,000 Descending	FlightAware ADS-B (AKL / NZAA)
Sun 05:05:59 PM	-36.9832	177.0618	← 271°	504.0	580.0	30550.0	-2,914 Descending	FlightAware ADS-B (TRG / NZTG)
Sun 05:06:18 PM	-36.9825	177.0087	← 271°	504.0	580.0	29700.0	-2,333 Descending	FlightAware ADS-B (ROT / NZRO)
Sun 05:06:44 PM	-36.9816	176.9353	← 271°	501.0	577.0	28800.0	-2,019 Descending	FlightAware ADS-B (HLZ / NZHN)
Sun 05:07:10 PM	-36.9806	176.8583	← 272°	499.0	574.0	27950.0	-1,867 Descending	FlightAware ADS-B (NZME)
Sun 05:07:29 PM	-36.9798	176.8032	← 272°	490.0	564.0	27400.0	-1,860 Descending	FlightAware ADS-B (ROT / NZRO)
Sun 05:08:00 PM	-36.9784	176.7156	← 271°	478.0	550.0	26400.0	-1,992 Descending	FlightAware ADS-B (NZJA)
Sun 05:08:30 PM	-36.9772	176.6334	← 271°	468.0	539.0	25375.0	-2,150 Descending	FlightAware ADS-B (NZJA)
Sun 05:09:00 PM	-36.976	176.554	← 271°	463.0	533.0	24250.0	-1,925 Descending	FlightAware ADS-B (NZPI)
Sun 05:09:30 PM	-36.9748	176.4751	← 271°	460.0	529.0	23450.0	-1,350 Descending	FlightAware ADS-B (TRG / NZTG)
Sun 05:10:00 PM	-36.9735	176.3943	← 271°	456.0	525.0	22900.0	-1,125 Descending	FlightAware ADS-B (NZPI)
Sun 05:10:30 PM	-36.9721	176.3165	← 271°	454.0	522.0	22325.0	-1,525 Descending	FlightAware ADS-B (AMZ / NZAR)
Sun 05:11:00 PM	-36.9706	176.239	← 271°	448.0	516.0	21375.0	-2,075 Descending	FlightAware ADS-B (AKL / NZAA)
Sun 05:11:30 PM	-36.969	176.1616	← 271°	444.0	511.0	20250.0	-2,225 Descending	FlightAware ADS-B (AMZ / NZAR)
Sun 05:12:00 PM	-36.9675	176.0852	← 271°	437.0	503.0	19150.0	-2,475 Descending	FlightAware ADS-B (TRG / NZTG)
Sun 05:12:30 PM	-36.9661	176.009	← 272°	430.0	495.0	17775.0	-2,675 Descending	FlightAware ADS-B (TRG / NZTG)
Sun 05:13:00 PM	-36.9645	175.936	← 272°	421.0	484.0	16475.0	-2,735 Descending	FlightAware ADS-B (TRG / NZTG)
Sun 05:13:21 PM	-36.9634	175.8839	← 272°	416.0	479.0	15450.0	-2,927 Descending	FlightAware ADS-B (AKL / NZAA)
Sun 05:13:41 PM	-36.9623	175.8364	← 272°	410.0	472.0	14475.0	-2,890 Descending	FlightAware ADS-B (NZPI)
Sun 05:14:02 PM	-36.9612	175.7869	← 273°	406.0	467.0	13475.0	-2,738 Descending	FlightAware ADS-B (AKL / NZAA)
Sun 05:14:21 PM	-36.9602	175.7436	← 272°	396.0	456.0	12650.0	-2,605 Descending	FlightAware ADS-B (NZKE)
Sun 05:14:40 PM	-36.9592	175.7018	← 273°	390.0	449.0	11825.0	-2,724 Descending	FlightAware ADS-B (ROT / NZRO)
Sun 05:15:10 PM	-36.9578	175.6347	← 272°	382.0	440.0	10425.0	-2,827 Descending	FlightAware ADS-B (ROT / NZRO)
Sun 05:15:32 PM	-36.9567	175.5878	← 272°	374.0	430.0	9375.0	-2,588 Descending	FlightAware ADS-B (HLZ / NZHN)
Sun 05:16:01 PM	-36.9548	175.5224	← 272°	366.0	421.0	8225.0	-2,161 Descending	FlightAware ADS-B (NZKE)
Sun 05:16:31 PM	-36.9534	175.4609	← 271°	360.0	414.0	7250.0	-1,830 Descending	FlightAware ADS-B (AKL / NZAA)
Sun 05:16:51 PM	-36.9526	175.4209	← 273°	353.0	406.0	6700.0	-2,042 Descending	FlightAware ADS-B (AKL / NZAA)
Sun 05:17:07 PM	-36.9517	175.3872	← 272°	343.0	395.0	6025.0	-1,843 Descending	FlightAware ADS-B (NZKE)
Sun 05:17:26 PM	-36.9507	175.3539	← 273°	328.0	377.0	5625.0	-915 Descending	FlightAware ADS-B (AKL / NZAA)
Sun 05:17:48 PM	-36.9495	175.3116	← 272°	298.0	343.0	5400.0	-519 Descending	FlightAware ADS-B (NZPK)
Sun 05:18:18 PM	-36.9482	175.2637	← 272°	271.0	312.0	5175.0	-433 Descending	FlightAware ADS-B (WRE / NZWR)
Sun 05:18:40 PM	-36.9474	175.232	← 272°	258.0	297.0	5025.0	-439 Descending	FlightAware ADS-B (WHK / NZWK)
Sun 05:18:59 PM	-36.9466	175.2037	← 273°	247.0	284.0	4875.0	-868 Descending	FlightAware ADS-B (NZPK)
Sun 05:19:18 PM	-36.9459	175.1748	← 272°	249.0	287.0	4475.0	-1,207 Descending	FlightAware ADS-B (AKL / NZAA)
Sun 05:19:40 PM	-36.9451	175.1438	← 272°	255.0	293.0	4050.0	-1,141 Descending	FlightAware ADS-B (AKL / NZAA)
Sun 05:20:04 PM	-36.944	175.109	← 272°	251.0	289.0	3600.0	-872 Descending	FlightAware ADS-B (AKL / NZAA)
Sun 05:20:23 PM	-36.9432	175.0819	← 272°	243.0	280.0	3425.0	-514 Descending	FlightAware ADS-B (AKL / NZAA)
Sun 05:20:39 PM	-36.9425	175.0597	← 272°	232.0	267.0	3300.0	-469 Descending	FlightAware ADS-B (AKL / NZAA)
Sun 05:20:55 PM	-36.9433	175.0374	← 261°	219.0	252.0	3175.0	-318 Descending	FlightAware ADS-B (AKL / NZAA)
Sun 05:21:12 PM	-36.9474	175.0198	← 251°	202.0	232.0	3125.0	-250 Descending	FlightAware ADS-B (AKL / NZAA)
Sun 05:21:31 PM	-36.9531	174.9996	← 252°	190.0	219.0	3025.0	-608 Descending	FlightAware ADS-B (AKL / NZAA)
Sun 05:21:49 PM	-36.9583	174.9804	← 252°	183.0	211.0	2750.0	-971 Descending	FlightAware ADS-B (NZMB)
Sun 05:22:05 PM	-36.9624	174.9652	← 251°	181.0	208.0	2475.0	-938 Descending	FlightAware ADS-B (NZWP)
Sun 05:22:21 PM	-36.9669	174.9492	← 252°	177.0	204.0	2250.0	-891 Descending	FlightAware ADS-B (AKL / NZAA)
Sun 05:22:37 PM	-36.9711	174.9341	← 251°	169.0	194.0	2000.0	-891 Descending	FlightAware ADS-B (AKL / NZAA)
Sun 05:22:53 PM	-36.9748	174.9206	← 251°	160.0	184.0	1775.0	-825 Descending	FlightAware ADS-B (AKL / NZAA)
Sun 05:23:17 PM	-36.9806	174.8997	← 251°	152.0	175.0	1450.0	-794 Descending	FlightAware ADS-B (AKL / NZAA)
Sun 05:23:44 PM	-36.9869	174.8772	← 251°	134.0	154.0	1100.0	-733 Descending	FlightAware ADS-B (NZPK)
Sun 05:24:00 PM	-36.99	174.8659	← 251°	132.0	152.0	925.0	-656 Descending	FlightAware ADS-B (NZPK)
Sun 05:24:16 PM	-36.9931	174.8548	← 252°	133.0	153.0	750.0	-656 Descending	FlightAware ADS-B (AKL / NZAA)
Sun 05:24:32 PM	-36.9961	174.8436	← 252°	133.0	153.0	575.0	-656 Descending	FlightAware ADS-B (AKL / NZAA)
