# Supplementary material for: TrackMatcher – a tool for finding intercepts in tracks of geographical positions
Source: Copernicus journal article supplement (doi:10.5194/gmd-15-7557-2022), 2022-10-18
Supplement: Supplementary file 1 [file gmd-15-7557-2022-supplement.zip › ESM/example/data/flights/ANZ175_27-JAN-2019_NZAA-YPPH.dat]

Time (CET)	Latitude	Longitude	Course	kts	mph	feet	Rate	Reporting Facility
Sun 01:10:22 AM	-37.0236	174.7446	← 252°	186.0	214.0	875.0	Level	FlightAware ADS-B (AKL / NZAA)
Sun 01:10:38 AM	-37.0283	174.7272	← 252°	190.0	219.0	1550.0	1,781 Climbing	FlightAware ADS-B (RAG / NZRA)
Sun 01:10:54 AM	-37.0332	174.7091	← 251°	212.0	244.0	1825.0	1,154 Climbing	FlightAware ADS-B (AKL / NZAA)
Sun 01:11:17 AM	-37.0411	174.6798	← 251°	240.0	276.0	2300.0	1,739 Climbing	FlightAware ADS-B (AKL / NZAA)
Sun 01:11:38 AM	-37.0486	174.652	← 254°	246.0	283.0	3100.0	2,598 Climbing	FlightAware ADS-B (NZPK)
Sun 01:11:58 AM	-37.0508	174.6217	← 276°	259.0	298.0	4075.0	2,716 Climbing	FlightAware ADS-B (NZPI)
Sun 01:12:15 AM	-37.0457	174.5981	← 289°	266.0	306.0	4775.0	2,382 Climbing	FlightAware ADS-B (NZPI)
Sun 01:12:32 AM	-37.0393	174.572	← 287°	275.0	316.0	5425.0	1,743 Climbing	FlightAware ADS-B (NZPI)
Sun 01:12:52 AM	-37.0312	174.5399	← 288°	297.0	342.0	5850.0	1,184 Climbing	FlightAware ADS-B (NZWP)
Sun 01:13:10 AM	-37.0241	174.5121	← 289°	310.0	357.0	6175.0	1,368 Climbing	FlightAware ADS-B (NZME)
Sun 01:13:26 AM	-37.0162	174.4812	← 288°	327.0	376.0	6625.0	1,457 Climbing	FlightAware ADS-B (NZWP)
Sun 01:13:45 AM	-37.0075	174.4474	← 289°	340.0	391.0	7025.0	1,462 Climbing	FlightAware ADS-B (AKL / NZAA)
Sun 01:14:05 AM	-36.9979	174.41	← 288°	351.0	404.0	7575.0	1,708 Climbing	FlightAware ADS-B (NZPI)
Sun 01:14:21 AM	-36.99	174.3791	← 289°	357.0	411.0	8050.000000000001	1,875 Climbing	FlightAware ADS-B (AKL / NZAA)
Sun 01:14:41 AM	-36.98	174.3396	← 289°	362.0	417.0	8700.0	1,977 Climbing	FlightAware ADS-B (AKL / NZAA)
Sun 01:15:05 AM	-36.9673	174.2902	← 288°	368.0	423.0	9500.0	1,725 Climbing	FlightAware ADS-B (AMZ / NZAR)
Sun 01:15:21 AM	-36.9589	174.2571	← 289°	376.0	433.0	9850.0	1,622 Climbing	FlightAware ADS-B (AKL / NZAA)
Sun 01:15:42 AM	-36.9473	174.2122	← 288°	382.0	440.0	10500.0	1,913 Climbing	FlightAware ADS-B (NZWP)
Sun 01:16:01 AM	-36.9374	174.1733	← 288°	386.0	444.0	11125.0	1,950 Climbing	FlightAware ADS-B (AKL / NZAA)
Sun 01:16:32 AM	-36.9203	174.1072	← 288°	390.0	449.0	12125.0	1,990 Climbing	FlightAware ADS-B (NZRW)
Sun 01:16:53 AM	-36.9087	174.0626	← 289°	389.0	448.0	12850.0	1,964 Climbing	FlightAware ADS-B (NZPK)
Sun 01:17:14 AM	-36.8967	174.015	← 286°	394.0	453.0	13500.0	1,598 Climbing	FlightAware ADS-B (NZWP)
Sun 01:17:39 AM	-36.8867	173.9631	← 282°	398.0	458.0	14075.0	1,588 Climbing	FlightAware ADS-B (AKL / NZAA)
Sun 01:18:05 AM	-36.8779	173.9011	← 280°	406.0	467.0	14850.0	1,607 Climbing	FlightAware ADS-B (NZPI)
Sun 01:18:35 AM	-36.8683	173.8338	← 280°	414.0	476.0	15575.0	1,525 Climbing	FlightAware ADS-B (NZRW)
Sun 01:19:05 AM	-36.8578	173.7623	← 280°	419.0	482.0	16375.0	1,575 Climbing	FlightAware ADS-B (AKL / NZAA)
Sun 01:19:35 AM	-36.8472	173.6887	← 280°	424.0	488.0	17150.0	1,350 Climbing	FlightAware ADS-B (NZPI)
Sun 01:20:05 AM	-36.837	173.6181	← 280°	434.0	499.0	17725.0	975 Climbing	FlightAware ADS-B (AKL / NZAA)
Sun 01:20:35 AM	-36.8258	173.5417	← 280°	446.0	513.0	18125.0	825 Climbing	FlightAware ADS-B (AKL / NZAA)
Sun 01:21:05 AM	-36.8142	173.4631	← 281°	457.0	526.0	18550.0	1,050 Climbing	FlightAware ADS-B (NZPI)
Sun 01:21:35 AM	-36.8026	173.3843	← 280°	461.0	531.0	19175.0	1,279 Climbing	FlightAware ADS-B (NZPI)
Sun 01:22:06 AM	-36.7909	173.305	← 281°	463.0	533.0	19850.0	1,338 Climbing	FlightAware ADS-B (NZPI)
Sun 01:22:40 AM	-36.778	173.2168	← 280°	465.0	535.0	20625.0	1,289 Climbing	FlightAware ADS-B (NZPI)
Sun 01:23:03 AM	-36.7692	173.1567	← 282°	465.0	535.0	21075.0	1,261 Climbing	FlightAware ADS-B (NZPA)
Sun 01:23:24 AM	-36.761	173.102	← 282°	467.0	537.0	21550.0	1,180 Climbing	FlightAware ADS-B (AKL / NZAA)
Sun 01:24:04 AM	-36.7456	172.9985	← 282°	472.0	543.0	22275.0	1,050 Climbing	FlightAware ADS-B (AKL / NZAA)
Sun 01:24:34 AM	-36.7329	172.914	← 281°	476.0	548.0	22775.0	1,010 Climbing	FlightAware ADS-B (AKL / NZAA)
Sun 01:24:56 AM	-36.7243	172.8568	← 281°	478.0	550.0	23150.0	938 Climbing	FlightAware ADS-B (AKL / NZAA)
Sun 01:25:14 AM	-36.7166	172.8063	← 282°	481.0	554.0	23400.0	930 Climbing	FlightAware ADS-B (AKL / NZAA)
Sun 01:25:46 AM	-36.7033	172.7184	← 281°	484.0	557.0	23925.0	941 Climbing	FlightAware ADS-B (AMZ / NZAR)
Sun 01:26:05 AM	-36.6956	172.6679	← 281°	487.0	560.0	24200.0	938 Climbing	FlightAware ADS-B (AKL / NZAA)
Sun 01:26:26 AM	-36.6865	172.6078	← 281°	489.0	563.0	24550.0	971 Climbing	FlightAware ADS-B (AMZ / NZAR)
Sun 01:26:56 AM	-36.6739	172.5257	← 281°	491.0	565.0	25025.0	960 Climbing	FlightAware ADS-B (AKL / NZAA)
Sun 01:27:16 AM	-36.6653	172.47	← 281°	492.0	566.0	25350.0	930 Climbing	FlightAware ADS-B (AMZ / NZAR)
Sun 01:27:46 AM	-36.6523	172.3863	← 281°	494.0	568.0	25800.0	925 Climbing	FlightAware ADS-B (AMZ / NZAR)
Sun 01:28:16 AM	-36.6392	172.3029	← 281°	496.0	571.0	26275.0	1,225 Climbing	FlightAware ADS-B (AMZ / NZAR)
Sun 01:28:46 AM	-36.6262	172.2201	← 281°	489.0	563.0	27025.0	1,844 Climbing	FlightAware ADS-B (AMZ / NZAR)
Sun 01:29:17 AM	-36.6128	172.1346	← 281°	480.0	552.0	28150.0	1,648 Climbing	FlightAware ADS-B (AKL / NZAA)
Sun 01:29:47 AM	-36.6002	172.0542	← 281°	481.0	554.0	28700.0	1,075 Climbing	FlightAware ADS-B (NZRW)
Sun 01:30:17 AM	-36.5874	171.9733	← 281°	483.0	556.0	29225.0	1,075 Climbing	FlightAware ADS-B (NZRW)
Sun 01:30:47 AM	-36.5747	171.8931	← 281°	485.0	558.0	29775.0	1,150 Climbing	FlightAware ADS-B (AMZ / NZAR)
Sun 01:31:17 AM	-36.5616	171.8115	← 281°	486.0	559.0	30375.0	1,600 Climbing	FlightAware ADS-B (AKL / NZAA)
Sun 01:31:47 AM	-36.5479	171.7269	← 281°	480.0	552.0	31375.0	1,750 Climbing	FlightAware ADS-B (AMZ / NZAR)
Sun 01:32:17 AM	-36.535	171.6468	← 281°	477.0	549.0	32125.0	1,425 Climbing	FlightAware ADS-B (AMZ / NZAR)
Sun 01:32:47 AM	-36.5221	171.5672	← 281°	476.0	548.0	32800.0	1,350 Climbing	FlightAware ADS-B (AKL / NZAA)
Sun 01:33:27 AM	-36.504	171.4558	← 281°	475.0	547.0	33700.0	1,205 Climbing	FlightAware ADS-B (AKL / NZAA)
Sun 01:33:43 AM	-36.498	171.4195	← 283°	475.0	547.0	33925.0	824 Climbing	FlightAware ADS-B (AKL / NZAA)
Sun 01:34:18 AM	-36.4824	171.3245	← 282°	481.0	554.0	34400.0	923 Climbing	FlightAware ADS-B (AMZ / NZAR)
Sun 01:34:48 AM	-36.4685	171.2408	← 282°	481.0	554.0	34925.0	1,082 Climbing	FlightAware ADS-B (AKL / NZAA)
Sun 01:35:19 AM	-36.4549	171.1585	← 282°	480.0	552.0	35500.0	1,040 Climbing	FlightAware ADS-B (AKL / NZAA)
Sun 01:35:50 AM	-36.4411	171.0757	← 282°	480.0	552.0	36000.0	401 Climbing	FlightAware ADS-B (AKL / NZAA)
Sun 01:36:30 AM	-36.4227	170.9658	← 282°	478.0	550.0	35975.0	-20 Descending	FlightAware ADS-B (AKL / NZAA)
Sun 01:37:05 AM	-36.4071	170.8732	← 282°	478.0	550.0	35975.0	23 Climbing	FlightAware ADS-B (AKL / NZAA)
Sun 01:37:35 AM	-36.3937	170.7945	← 282°	478.0	550.0	36000.0	24 Climbing	FlightAware ADS-B (AKL / NZAA)
Sun 01:38:08 AM	-36.383	170.7076	← 276°	473.0	544.0	36000.0	Level	FlightAware ADS-B (AKL / NZAA)
Sun 01:38:48 AM	-36.3756	170.5962	← 275°	473.0	544.0	36000.0	-21 Descending	FlightAware ADS-B (AKL / NZAA)
Sun 01:39:19 AM	-36.3705	170.5148	← 275°	472.0	543.0	35975.0	Level	FlightAware ADS-B (AKL / NZAA)
Sun 01:40:14 AM	-36.3608	170.3648	← 275°	472.0	543.0	36000.0	18 Climbing	FlightAware ADS-B (AKL / NZAA)
Sun 01:40:44 AM	-36.3555	170.2839	← 275°	472.0	543.0	36000.0	Level	FlightAware ADS-B (AKL / NZAA)
Sun 01:41:15 AM	-36.3501	170.2029	← 275°	473.0	544.0	36000.0	-19 Descending	FlightAware ADS-B (AKL / NZAA)
Sun 01:42:04 AM	-36.3413	170.0695	← 275°	474.0	545.0	35975.0	-31 Descending	FlightAware ADS-B (AKL / NZAA)
Sun 02:54:06 AM	-34.988	158.5176	← 263°	475.0	547.0	38000.0	Level	Aus ATC (ADS-B)
Sun 02:54:11 AM	-34.9858	158.5046	← 281°	475.0	547.0	38000.0	Level	Aus ATC (ADS-B)
Sun 02:54:21 AM	-34.9814	158.4783	← 281°	475.0	547.0	38000.0	Level	Aus ATC (ADS-B)
Sun 02:54:26 AM	-34.9792	158.4653	← 282°	475.0	547.0	38000.0	Level	Aus ATC (ADS-B)
Sun 02:54:31 AM	-34.977	158.4523	← 282°	475.0	547.0	38000.0	Level	Aus ATC (ADS-B)
Sun 02:54:41 AM	-34.9726	158.4262	← 282°	475.0	547.0	38000.0	Level	Aus ATC (ADS-B)
Sun 02:54:46 AM	-34.9704	158.413	← 282°	475.0	547.0	38000.0	Level	Aus ATC (ADS-B)
Sun 02:54:56 AM	-34.966	158.3868	← 282°	476.0	548.0	38000.0	Level	Aus ATC (ADS-B)
Sun 02:55:11 AM	-34.9593	158.3475	← 282°	476.0	548.0	38000.0	Level	Aus ATC (ADS-B)
Sun 02:55:21 AM	-34.955	158.3215	← 281°	476.0	548.0	38000.0	Level	Aus ATC (ADS-B)
Sun 02:55:26 AM	-34.9527	158.3084	← 281°	475.0	547.0	38000.0	Level	Aus ATC (ADS-B)
Sun 02:55:36 AM	-34.9483	158.2822	← 282°	475.0	547.0	38000.0	Level	Aus ATC (ADS-B)
Sun 02:55:41 AM	-34.9461	158.2691	← 282°	475.0	547.0	38000.0	Level	Aus ATC (ADS-B)
Sun 02:55:46 AM	-34.9439	158.2562	← 282°	475.0	547.0	38000.0	Level	Aus ATC (ADS-B)
Sun 02:55:51 AM	-34.9416	158.2429	← 282°	475.0	547.0	38000.0	Level	Aus ATC (ADS-B)
Sun 02:56:06 AM	-34.935	158.204	← 282°	476.0	548.0	38000.0	Level	Aus ATC (ADS-B)
Sun 02:56:16 AM	-34.9305	158.1776	← 282°	476.0	548.0	38000.0	Level	Aus ATC (ADS-B)
Sun 02:56:21 AM	-34.9282	158.1646	← 282°	476.0	548.0	38000.0	Level	Aus ATC (ADS-B)
Sun 02:56:31 AM	-34.9238	158.1385	← 281°	476.0	548.0	38000.0	Level	Aus ATC (ADS-B)
Sun 02:56:36 AM	-34.9215	158.1255	← 282°	475.0	547.0	38000.0	Level	Aus ATC (ADS-B)
Sun 02:56:41 AM	-34.9193	158.1124	← 281°	475.0	547.0	38000.0	Level	Aus ATC (ADS-B)
Sun 02:56:51 AM	-34.9149	158.0863	← 282°	475.0	547.0	38000.0	Level	Aus ATC (ADS-B)
Sun 02:56:56 AM	-34.9126	158.0733	← 282°	475.0	547.0	38000.0	Level	Aus ATC (ADS-B)
Sun 02:57:06 AM	-34.9081	158.0472	← 282°	475.0	547.0	38000.0	Level	Aus ATC (ADS-B)
Sun 02:57:21 AM	-34.9014	158.0079	← 282°	475.0	547.0	38000.0	Level	Aus ATC (ADS-B)
Sun 02:57:31 AM	-34.8969	157.982	← 282°	474.0	545.0	38000.0	Level	Aus ATC (ADS-B)
Sun 02:57:36 AM	-34.8946	157.969	← 282°	474.0	545.0	38000.0	Level	Aus ATC (ADS-B)
Sun 02:57:46 AM	-34.8901	157.9429	← 282°	474.0	545.0	38000.0	Level	Aus ATC (ADS-B)
Sun 02:57:51 AM	-34.8879	157.9298	← 282°	474.0	545.0	38000.0	Level	Aus ATC (ADS-B)
Sun 02:57:56 AM	-34.8856	157.9168	← 282°	474.0	545.0	38000.0	Level	Aus ATC (ADS-B)
Sun 02:58:06 AM	-34.8812	157.8908	← 282°	473.0	544.0	38000.0	Level	Aus ATC (ADS-B)
Sun 02:58:11 AM	-34.8789	157.878	← 282°	473.0	544.0	38000.0	Level	Aus ATC (ADS-B)
Sun 02:58:21 AM	-34.8744	157.8521	← 282°	472.0	543.0	38000.0	Level	Aus ATC (ADS-B)
Sun 02:59:01 AM	-34.8564	157.7484	← 282°	472.0	543.0	38000.0	Level	Aus ATC (ADS-B)
Sun 02:59:10 AM	-34.8519	157.7226	← 282°	471.0	542.0	38000.0	Level	Aus ATC (ADS-B)
Sun 02:59:20 AM	-34.8474	157.697	← 282°	471.0	542.0	38000.0	Level	Aus ATC (ADS-B)
Sun 02:59:25 AM	-34.8451	157.6839	← 282°	471.0	542.0	38000.0	Level	Aus ATC (ADS-B)
Sun 02:59:35 AM	-34.8407	157.6583	← 282°	471.0	542.0	38000.0	Level	Aus ATC (ADS-B)
Sun 02:59:50 AM	-34.8338	157.6193	← 282°	472.0	543.0	38000.0	Level	Aus ATC (ADS-B)
Sun 03:00:05 AM	-34.827	157.5806	← 282°	472.0	543.0	38000.0	Level	Aus ATC (ADS-B)
Sun 03:00:15 AM	-34.8224	157.5547	← 282°	473.0	544.0	38000.0	-71 Descending	Aus ATC (ADS-B)
Sun 03:00:26 AM	-34.8175	157.527	← 282°	473.0	544.0	37975.0	Level	FlightAware ADS-B (YXWL)
Sun 03:00:30 AM	-34.8155	157.5159	← 282°	472.0	543.0	38000.0	107 Climbing	Aus ATC (ADS-B)
Sun 03:00:40 AM	-34.811	157.49	← 282°	472.0	543.0	38000.0	Level	Aus ATC (ADS-B)
Sun 03:00:45 AM	-34.8086	157.477	← 282°	472.0	543.0	38000.0	Level	Aus ATC (ADS-B)
Sun 03:00:55 AM	-34.8041	157.4512	← 282°	472.0	543.0	38000.0	Level	Aus ATC (ADS-B)
Sun 03:00:56 AM	-34.8039	157.4501	← 282°	472.0	543.0	38000.0	Level	FlightAware ADS-B (YXWL)
Sun 03:01:00 AM	-34.8018	157.4383	← 282°	472.0	543.0	38000.0	Level	Aus ATC (ADS-B)
Sun 03:01:05 AM	-34.7995	157.4253	← 282°	472.0	543.0	38000.0	Level	Aus ATC (ADS-B)
Sun 03:01:15 AM	-34.7949	157.3995	← 282°	470.0	541.0	38000.0	Level	Aus ATC (ADS-B)
Sun 03:01:20 AM	-34.7927	157.3868	← 282°	470.0	541.0	38000.0	Level	Aus ATC (ADS-B)
Sun 03:01:30 AM	-34.788	157.3609	← 282°	470.0	541.0	38000.0	Level	Aus ATC (ADS-B)
Sun 03:01:45 AM	-34.7812	157.3225	← 282°	470.0	541.0	38000.0	Level	Aus ATC (ADS-B)
Sun 03:01:55 AM	-34.7766	157.2968	← 282°	470.0	541.0	38000.0	Level	Aus ATC (ADS-B)
Sun 03:02:00 AM	-34.7743	157.2839	← 282°	470.0	541.0	38000.0	Level	Aus ATC (ADS-B)
Sun 03:02:10 AM	-34.7697	157.2581	← 282°	470.0	541.0	38000.0	Level	Aus ATC (ADS-B)
Sun 03:02:15 AM	-34.7675	157.2454	← 282°	469.0	540.0	38000.0	Level	Aus ATC (ADS-B)
Sun 03:02:45 AM	-34.7537	157.1685	← 282°	469.0	540.0	38000.0	Level	Aus ATC (ADS-B)
Sun 03:03:00 AM	-34.7468	157.1301	← 283°	468.0	539.0	38000.0	Level	Aus ATC (ADS-B)
Sun 03:03:10 AM	-34.7421	157.1045	← 282°	469.0	540.0	38000.0	Level	Aus ATC (ADS-B)
Sun 03:03:15 AM	-34.7398	157.0915	← 282°	469.0	540.0	38000.0	Level	Aus ATC (ADS-B)
Sun 03:03:25 AM	-34.7352	157.066	← 282°	469.0	540.0	38000.0	Level	Aus ATC (ADS-B)
Sun 03:04:00 AM	-34.719	156.9764	← 282°	469.0	540.0	38000.0	Level	Aus ATC (ADS-B)
Sun 03:04:10 AM	-34.7143	156.9507	← 283°	469.0	540.0	38000.0	Level	Aus ATC (ADS-B)
Sun 03:04:15 AM	-34.712	156.9379	← 282°	469.0	540.0	38000.0	Level	Aus ATC (ADS-B)
Sun 03:04:25 AM	-34.7073	156.9121	← 282°	470.0	541.0	38000.0	Level	Aus ATC (ADS-B)
Sun 03:04:40 AM	-34.7003	156.8738	← 283°	469.0	540.0	38000.0	Level	Aus ATC (ADS-B)
Sun 03:04:50 AM	-34.6956	156.8482	← 282°	469.0	540.0	38000.0	Level	Aus ATC (ADS-B)
Sun 03:04:55 AM	-34.6933	156.8352	← 283°	469.0	540.0	38000.0	Level	Aus ATC (ADS-B)
Sun 03:05:05 AM	-34.6885	156.8095	← 283°	468.0	539.0	38000.0	Level	Aus ATC (ADS-B)
Sun 03:05:10 AM	-34.6862	156.7969	← 283°	468.0	539.0	38000.0	Level	Aus ATC (ADS-B)
Sun 03:05:15 AM	-34.6839	156.7842	← 283°	468.0	539.0	38000.0	Level	Aus ATC (ADS-B)
Sun 03:05:25 AM	-34.6792	156.7584	← 283°	468.0	539.0	38000.0	Level	Aus ATC (ADS-B)
Sun 03:05:30 AM	-34.6768	156.7459	← 283°	468.0	539.0	38000.0	Level	Aus ATC (ADS-B)
Sun 03:05:40 AM	-34.6721	156.7201	← 282°	467.0	537.0	38000.0	Level	Aus ATC (ADS-B)
Sun 03:05:55 AM	-34.6651	156.6818	← 283°	467.0	537.0	38000.0	Level	Aus ATC (ADS-B)
Sun 03:06:05 AM	-34.6604	156.6563	← 283°	468.0	539.0	38000.0	Level	Aus ATC (ADS-B)
Sun 03:06:10 AM	-34.6581	156.6436	← 283°	468.0	539.0	38000.0	Level	Aus ATC (ADS-B)
Sun 03:06:20 AM	-34.6533	156.6179	← 282°	468.0	539.0	38000.0	Level	Aus ATC (ADS-B)
Sun 03:06:25 AM	-34.651	156.6051	← 282°	468.0	539.0	38000.0	Level	Aus ATC (ADS-B)
Sun 03:06:30 AM	-34.6486	156.5924	← 283°	468.0	539.0	38000.0	Level	Aus ATC (ADS-B)
Sun 03:06:41 AM	-34.6433	156.5638	← 283°	468.0	539.0	38000.0	Level	Aus ATC (ADS-B)
Sun 03:06:46 AM	-34.641	156.5513	← 282°	468.0	539.0	38000.0	Level	Aus ATC (ADS-B)
Sun 03:06:55 AM	-34.6368	156.5285	← 283°	468.0	539.0	38000.0	Level	Aus ATC (ADS-B)
Sun 03:06:56 AM	-34.6362	156.5254	← 281°	467.0	537.0	38000.0	Level	Aus ATC (ADS-B)
Sun 03:07:11 AM	-34.6293	156.4878	← 283°	467.0	537.0	38000.0	Level	Aus ATC (ADS-B)
Sun 03:07:21 AM	-34.627	156.4754	← 283°	468.0	539.0	38000.0	Level	Aus ATC (ADS-B)
Sun 03:07:25 AM	-34.6225	156.4521	← 283°	468.0	539.0	38000.0	Level	Aus ATC (ADS-B)
Sun 03:07:35 AM	-34.6178	156.4266	← 283°	468.0	539.0	38000.0	Level	Aus ATC (ADS-B)
Sun 03:07:51 AM	-34.6107	156.3885	← 283°	468.0	539.0	38000.0	Level	Aus ATC (ADS-B)
Sun 03:08:05 AM	-34.6035	156.3502	← 283°	468.0	539.0	38000.0	Level	Aus ATC (ADS-B)
Sun 03:08:06 AM	-34.6029	156.3469	← 283°	468.0	539.0	38000.0	Level	Aus ATC (ADS-B)
Sun 03:08:16 AM	-34.5982	156.3215	← 283°	468.0	539.0	38000.0	Level	Aus ATC (ADS-B)
Sun 03:08:21 AM	-34.5957	156.3088	← 284°	468.0	539.0	38000.0	Level	Aus ATC (ADS-B)
Sun 03:09:06 AM	-34.5742	156.1941	← 283°	468.0	539.0	38000.0	Level	Aus ATC (ADS-B)
Sun 03:09:20 AM	-34.5676	156.1592	← 283°	467.0	537.0	38000.0	Level	Aus ATC (ADS-B)
Sun 03:09:21 AM	-34.567	156.1558	← 283°	467.0	537.0	38000.0	Level	Aus ATC (ADS-B)
Sun 03:09:31 AM	-34.5622	156.1305	← 283°	467.0	537.0	38000.0	Level	Aus ATC (ADS-B)
Sun 03:09:36 AM	-34.5597	156.1178	← 283°	467.0	537.0	38000.0	Level	Aus ATC (ADS-B)
Sun 03:09:44 AM	-34.5556	156.0957	← 283°	467.0	537.0	38000.0	Level	Aus ATC (ADS-B)
Sun 03:09:51 AM	-34.5525	156.0797	← 283°	467.0	537.0	38000.0	Level	Aus ATC (ADS-B)
Sun 03:09:56 AM	-34.5501	156.0668	← 283°	467.0	537.0	38000.0	Level	Aus ATC (ADS-B)
Sun 03:10:04 AM	-34.5459	156.0446	← 283°	467.0	537.0	38000.0	Level	Aus ATC (ADS-B)
Sun 03:10:09 AM	-34.5435	156.0318	← 283°	468.0	539.0	38000.0	Level	Aus ATC (ADS-B)
Sun 03:10:19 AM	-34.5386	156.0064	← 283°	468.0	539.0	38000.0	Level	Aus ATC (ADS-B)
Sun 03:10:21 AM	-34.5381	156.0034	← 284°	468.0	539.0	38000.0	Level	Aus ATC (ADS-B)
Sun 03:10:23 AM	-34.5372	155.9988	← 283°	468.0	539.0	38000.0	Level	FlightAware ADS-B (YCFS)
Sun 03:10:34 AM	-34.5314	155.9682	← 283°	468.0	539.0	38000.0	44 Climbing	Aus ATC (ADS-B)
Sun 03:10:57 AM	-34.5206	155.9118	← 283°	469.0	540.0	38025.0	Level	FlightAware ADS-B (YXWL)
Sun 03:11:28 AM	-34.5055	155.8327	← 283°	468.0	539.0	38000.0	-23 Descending	FlightAware ADS-B (YXWL)
Sun 03:12:01 AM	-34.4893	155.7485	← 283°	468.0	539.0	38000.0	Level	Aus ATC (ADS-B)
Sun 03:12:16 AM	-34.4819	155.7103	← 283°	469.0	540.0	38000.0	Level	Aus ATC (ADS-B)
Sun 03:12:26 AM	-34.477	155.6847	← 283°	469.0	540.0	38000.0	Level	Aus ATC (ADS-B)
Sun 03:12:31 AM	-34.4745	155.672	← 283°	469.0	540.0	38000.0	-188 Descending	Aus ATC (ADS-B)
Sun 03:12:34 AM	-34.4728	155.6629	← 283°	469.0	540.0	37975.0	Level	FlightAware ADS-B (YXWL)
Sun 03:12:41 AM	-34.4696	155.6466	← 283°	469.0	540.0	38000.0	125 Climbing	Aus ATC (ADS-B)
Sun 03:12:46 AM	-34.4671	155.6339	← 283°	469.0	540.0	38000.0	Level	Aus ATC (ADS-B)
Sun 03:12:51 AM	-34.4646	155.621	← 283°	469.0	540.0	38000.0	Level	Aus ATC (ADS-B)
Sun 03:13:01 AM	-34.4597	155.5954	← 283°	469.0	540.0	38000.0	Level	Aus ATC (ADS-B)
Sun 03:13:06 AM	-34.4572	155.5829	← 284°	469.0	540.0	38000.0	Level	Aus ATC (ADS-B)
Sun 03:13:16 AM	-34.4522	155.5571	← 283°	470.0	541.0	38000.0	Level	Aus ATC (ADS-B)
Sun 03:13:31 AM	-34.4448	155.5189	← 283°	470.0	541.0	38000.0	-79 Descending	Aus ATC (ADS-B)
Sun 03:13:35 AM	-34.4426	155.5076	← 283°	471.0	542.0	37975.0	Level	FlightAware ADS-B (SYD / YSSY)
Sun 03:14:06 AM	-34.4273	155.4294	← 283°	471.0	542.0	38000.0	38 Climbing	Aus ATC (ADS-B)
Sun 03:14:14 AM	-34.423	155.4072	← 283°	472.0	543.0	38000.0	Level	Aus ATC (ADS-B)
Sun 03:14:45 AM	-34.4073	155.3271	← 283°	472.0	543.0	38000.0	Level	Aus ATC (ADS-B)
Sun 03:14:59 AM	-34.4004	155.292	← 283°	472.0	543.0	38000.0	Level	Aus ATC (ADS-B)
Sun 03:15:10 AM	-34.3947	155.2633	← 283°	472.0	543.0	38000.0	Level	Aus ATC (ADS-B)
Sun 03:15:14 AM	-34.3928	155.2534	← 283°	472.0	543.0	38000.0	Level	FlightAware ADS-B (YXWL)
Sun 03:15:24 AM	-34.3878	155.2282	← 284°	472.0	543.0	38000.0	Level	Aus ATC (ADS-B)
Sun 03:15:25 AM	-34.3871	155.2247	← 284°	472.0	543.0	38000.0	Level	Aus ATC (ADS-B)
Sun 03:15:35 AM	-34.3823	155.1991	← 283°	472.0	543.0	38000.0	Level	Aus ATC (ADS-B)
Sun 03:15:40 AM	-34.3801	155.1863	← 282°	472.0	543.0	38000.0	Level	Aus ATC (ADS-B)
Sun 03:15:45 AM	-34.3779	155.1726	← 281°	472.0	543.0	38000.0	Level	FlightAware ADS-B (YMIG)
Sun 03:15:49 AM	-34.3766	155.1638	← 280°	473.0	544.0	38000.0	-47 Descending	Aus ATC (ADS-B)
Sun 03:16:17 AM	-34.3675	155.09	← 277°	472.0	543.0	37975.0	Level	FlightAware ADS-B (SYD / YSSY)
Sun 03:16:25 AM	-34.3655	155.069	← 277°	472.0	543.0	38000.0	65 Climbing	Aus ATC (ADS-B)
Sun 03:16:40 AM	-34.3614	155.0294	← 277°	472.0	543.0	38000.0	Level	Aus ATC (ADS-B)
Sun 03:16:55 AM	-34.3574	154.99	← 277°	472.0	543.0	38000.0	Level	Aus ATC (ADS-B)
Sun 03:16:59 AM	-34.3566	154.9828	← 277°	472.0	543.0	38000.0	Level	FlightAware ADS-B (NTL / YWLM)
Sun 03:17:05 AM	-34.3546	154.9639	← 277°	472.0	543.0	38000.0	Level	Aus ATC (ADS-B)
Sun 03:17:10 AM	-34.3533	154.9511	← 277°	472.0	543.0	38000.0	Level	Aus ATC (ADS-B)
Sun 03:17:19 AM	-34.351	154.929	← 277°	472.0	543.0	38000.0	Level	Aus ATC (ADS-B)
Sun 03:17:25 AM	-34.3492	154.9118	← 277°	471.0	542.0	38000.0	Level	Aus ATC (ADS-B)
Sun 03:17:30 AM	-34.3479	154.8988	← 277°	471.0	542.0	38000.0	-250 Descending	Aus ATC (ADS-B)
Sun 03:17:31 AM	-34.3473	154.8936	← 277°	471.0	542.0	37975.0	Level	FlightAware ADS-B (YMIG)
Sun 03:17:40 AM	-34.3451	154.873	← 277°	470.0	541.0	38000.0	115 Climbing	Aus ATC (ADS-B)
Sun 03:17:44 AM	-34.3442	154.864	← 277°	470.0	541.0	38000.0	Level	Aus ATC (ADS-B)
Sun 03:17:55 AM	-34.3411	154.8341	← 277°	470.0	541.0	38000.0	Level	Aus ATC (ADS-B)
Sun 03:18:01 AM	-34.3392	154.8155	← 277°	470.0	541.0	38000.0	Level	FlightAware ADS-B (YMIG)
Sun 03:18:09 AM	-34.3375	154.7991	← 277°	470.0	541.0	38000.0	-48 Descending	Aus ATC (ADS-B)
Sun 03:18:32 AM	-34.3309	154.7373	← 277°	470.0	541.0	37975.0	Level	FlightAware ADS-B (YMIG)
Sun 03:18:45 AM	-34.3274	154.7041	← 277°	470.0	541.0	38000.0	68 Climbing	Aus ATC (ADS-B)
Sun 03:18:54 AM	-34.325	154.6821	← 277°	470.0	541.0	38000.0	Level	Aus ATC (ADS-B)
Sun 03:18:59 AM	-34.3237	154.6693	← 277°	470.0	541.0	38000.0	-150 Descending	Aus ATC (ADS-B)
Sun 03:19:04 AM	-34.3219	154.6525	← 277°	470.0	541.0	37975.0	Level	FlightAware ADS-B (YMIG)
Sun 03:19:05 AM	-34.3219	154.6521	→ 96°	470.0	541.0	38000.0	250 Climbing	Aus ATC (ADS-B)
Sun 03:19:10 AM	-34.3205	154.6391	← 277°	470.0	541.0	38000.0	Level	Aus ATC (ADS-B)
Sun 03:19:20 AM	-34.3178	154.6131	← 277°	470.0	541.0	38000.0	Level	Aus ATC (ADS-B)
Sun 03:19:24 AM	-34.3168	154.6043	← 278°	470.0	541.0	38000.0	Level	Aus ATC (ADS-B)
Sun 03:19:35 AM	-34.3137	154.5745	← 277°	470.0	541.0	38000.0	Level	Aus ATC (ADS-B)
Sun 03:19:38 AM	-34.3129	154.5672	← 277°	469.0	540.0	38000.0	Level	FlightAware ADS-B (YXWL)
Sun 03:19:49 AM	-34.3099	154.5394	← 277°	469.0	540.0	38000.0	Level	Aus ATC (ADS-B)
Sun 03:19:50 AM	-34.3095	154.5356	← 278°	469.0	540.0	38000.0	Level	Aus ATC (ADS-B)
Sun 03:20:00 AM	-34.3067	154.5096	← 277°	469.0	540.0	38000.0	Level	Aus ATC (ADS-B)
Sun 03:20:05 AM	-34.3053	154.4966	← 277°	469.0	540.0	38000.0	-150 Descending	Aus ATC (ADS-B)
Sun 03:20:10 AM	-34.3041	154.4849	← 277°	469.0	540.0	37975.0	Level	FlightAware ADS-B (SYD / YSSY)
Sun 03:20:15 AM	-34.3026	154.4705	← 277°	469.0	540.0	38000.0	150 Climbing	Aus ATC (ADS-B)
Sun 03:20:20 AM	-34.3012	154.4578	← 277°	469.0	540.0	38000.0	Level	Aus ATC (ADS-B)
Sun 03:20:25 AM	-34.2998	154.4449	← 277°	469.0	540.0	38000.0	Level	Aus ATC (ADS-B)
Sun 03:20:35 AM	-34.297	154.4188	← 277°	469.0	540.0	38000.0	Level	Aus ATC (ADS-B)
Sun 03:20:40 AM	-34.2956	154.4059	← 277°	469.0	540.0	38000.0	Level	Aus ATC (ADS-B)
Sun 03:21:11 AM	-34.2869	154.3265	← 278°	470.0	541.0	38000.0	Level	FlightAware ADS-B (SYD / YSSY)
Sun 03:21:30 AM	-34.2815	154.2764	← 277°	470.0	541.0	38000.0	Level	Aus ATC (ADS-B)
Sun 03:21:35 AM	-34.28	154.2633	← 278°	470.0	541.0	38000.0	Level	Aus ATC (ADS-B)
Sun 03:21:40 AM	-34.2787	154.2506	← 277°	470.0	541.0	38000.0	Level	Aus ATC (ADS-B)
Sun 03:21:41 AM	-34.2784	154.2482	← 278°	470.0	541.0	38000.0	Level	FlightAware ADS-B (SYD / YSSY)
Sun 03:21:50 AM	-34.2758	154.2244	← 278°	470.0	541.0	38000.0	Level	Aus ATC (ADS-B)
Sun 03:21:55 AM	-34.2743	154.2114	← 278°	470.0	541.0	38000.0	Level	Aus ATC (ADS-B)
Sun 03:22:05 AM	-34.2715	154.1855	← 278°	470.0	541.0	38000.0	Level	Aus ATC (ADS-B)
Sun 03:22:08 AM	-34.2705	154.1765	← 278°	470.0	541.0	38000.0	Level	Aus ATC (ADS-B)
Sun 03:22:20 AM	-34.2672	154.1464	← 278°	470.0	541.0	38000.0	Level	Aus ATC (ADS-B)
Sun 03:22:33 AM	-34.2634	154.1119	← 278°	469.0	540.0	38000.0	Level	Aus ATC (ADS-B)
Sun 03:22:35 AM	-34.2629	154.1078	← 278°	469.0	540.0	38000.0	Level	Aus ATC (ADS-B)
Sun 03:22:45 AM	-34.26	154.082	← 278°	469.0	540.0	38000.0	Level	Aus ATC (ADS-B)
Sun 03:22:50 AM	-34.2586	154.069	← 277°	469.0	540.0	38000.0	Level	Aus ATC (ADS-B)
Sun 03:22:58 AM	-34.2561	154.0471	← 278°	469.0	540.0	38000.0	Level	Aus ATC (ADS-B)
Sun 03:23:05 AM	-34.2543	154.0301	← 278°	469.0	540.0	38000.0	Level	Aus ATC (ADS-B)
Sun 03:23:10 AM	-34.2528	154.0173	← 278°	469.0	540.0	38000.0	-214 Descending	Aus ATC (ADS-B)
Sun 03:23:12 AM	-34.2523	154.0128	← 278°	469.0	540.0	37975.0	Level	FlightAware ADS-B (SYD / YSSY)
Sun 03:23:20 AM	-34.2499	153.9912	← 277°	468.0	539.0	38000.0	136 Climbing	Aus ATC (ADS-B)
Sun 03:23:23 AM	-34.2489	153.9823	← 278°	469.0	540.0	38000.0	Level	Aus ATC (ADS-B)
Sun 03:23:35 AM	-34.2456	153.9525	← 278°	469.0	540.0	38000.0	-79 Descending	Aus ATC (ADS-B)
Sun 03:23:42 AM	-34.2436	153.9348	← 278°	469.0	540.0	37975.0	Level	FlightAware ADS-B (YRAY)
Sun 03:23:48 AM	-34.2417	153.9177	← 278°	469.0	540.0	38000.0	88 Climbing	Aus ATC (ADS-B)
Sun 03:23:59 AM	-34.2384	153.8882	← 278°	469.0	540.0	38000.0	Level	FlightAware ADS-B (SYD / YSSY)
Sun 03:24:25 AM	-34.2311	153.8232	← 278°	469.0	540.0	38000.0	Level	Aus ATC (ADS-B)
Sun 03:24:29 AM	-34.2299	153.8126	← 279°	469.0	540.0	38000.0	Level	FlightAware ADS-B (SYD / YSSY)
Sun 03:24:45 AM	-34.2252	153.7716	← 278°	469.0	540.0	38000.0	Level	Aus ATC (ADS-B)
Sun 03:24:50 AM	-34.2237	153.7585	← 278°	469.0	540.0	38000.0	Level	Aus ATC (ADS-B)
Sun 03:24:59 AM	-34.221	153.7349	← 278°	469.0	540.0	38000.0	Level	FlightAware ADS-B (SYD / YSSY)
Sun 03:25:00 AM	-34.2208	153.7326	← 277°	469.0	540.0	38000.0	Level	Aus ATC (ADS-B)
Sun 03:25:06 AM	-34.2193	153.7199	← 278°	469.0	540.0	38000.0	Level	Aus ATC (ADS-B)
Sun 03:25:15 AM	-34.2164	153.6938	← 278°	469.0	540.0	38000.0	Level	Aus ATC (ADS-B)
Sun 03:25:30 AM	-34.212	153.6553	← 278°	468.0	539.0	38000.0	Level	Aus ATC (ADS-B)
Sun 03:25:45 AM	-34.2075	153.6164	← 278°	469.0	540.0	38000.0	Level	Aus ATC (ADS-B)
Sun 03:25:55 AM	-34.2045	153.5906	← 278°	469.0	540.0	38000.0	Level	Aus ATC (ADS-B)
Sun 03:25:59 AM	-34.2031	153.5776	← 277°	469.0	540.0	38000.0	Level	Aus ATC (ADS-B)
Sun 03:26:00 AM	-34.2026	153.5741	← 279°	469.0	540.0	38000.0	Level	FlightAware ADS-B (SYD / YSSY)
Sun 03:26:14 AM	-34.1986	153.5388	← 278°	470.0	541.0	38000.0	Level	Aus ATC (ADS-B)
Sun 03:26:20 AM	-34.1971	153.5259	← 278°	470.0	541.0	38000.0	Level	Aus ATC (ADS-B)
Sun 03:26:29 AM	-34.1941	153.4999	← 278°	470.0	541.0	38000.0	Level	Aus ATC (ADS-B)
Sun 03:26:31 AM	-34.1936	153.4955	← 279°	469.0	540.0	38000.0	Level	FlightAware ADS-B (SYD / YSSY)
Sun 03:26:44 AM	-34.1896	153.4611	← 278°	470.0	541.0	38000.0	Level	Aus ATC (ADS-B)
Sun 03:26:59 AM	-34.1851	153.4224	← 278°	470.0	541.0	38000.0	Level	Aus ATC (ADS-B)
Sun 03:27:01 AM	-34.1845	153.4177	← 279°	470.0	541.0	38000.0	Level	FlightAware ADS-B (SYD / YSSY)
Sun 03:27:09 AM	-34.182	153.3964	← 278°	470.0	541.0	38000.0	Level	Aus ATC (ADS-B)
Sun 03:27:14 AM	-34.1805	153.3835	← 278°	471.0	542.0	38000.0	Level	Aus ATC (ADS-B)
Sun 03:27:24 AM	-34.1775	153.3575	← 278°	471.0	542.0	38000.0	Level	Aus ATC (ADS-B)
Sun 03:27:28 AM	-34.1764	153.3486	← 279°	471.0	542.0	38000.0	Level	Aus ATC (ADS-B)
Sun 03:27:34 AM	-34.1745	153.3315	← 278°	470.0	541.0	38000.0	Level	Aus ATC (ADS-B)
Sun 03:27:35 AM	-34.1743	153.3305	← 278°	471.0	542.0	38000.0	Level	FlightAware ADS-B (SYD / YSSY)
Sun 03:27:43 AM	-34.1719	153.3097	← 278°	471.0	542.0	38000.0	Level	Aus ATC (ADS-B)
Sun 03:27:49 AM	-34.1699	153.2927	← 278°	471.0	542.0	38000.0	Level	Aus ATC (ADS-B)
Sun 03:27:58 AM	-34.1673	153.2708	← 278°	472.0	543.0	38000.0	Level	Aus ATC (ADS-B)
Sun 03:27:59 AM	-34.1668	153.2666	← 278°	472.0	543.0	38000.0	Level	Aus ATC (ADS-B)
Sun 03:28:05 AM	-34.1653	153.2536	← 278°	472.0	543.0	38000.0	Level	FlightAware ADS-B (BWU / YSBK)
Sun 03:28:14 AM	-34.1622	153.2277	← 278°	472.0	543.0	38000.0	Level	Aus ATC (ADS-B)
Sun 03:28:24 AM	-34.1592	153.2019	← 278°	472.0	543.0	38000.0	Level	Aus ATC (ADS-B)
Sun 03:28:39 AM	-34.1545	153.163	← 278°	472.0	543.0	38000.0	-37 Descending	Aus ATC (ADS-B)
Sun 03:29:05 AM	-34.1467	153.0972	← 278°	470.0	541.0	37975.0	Level	FlightAware ADS-B (YSMB)
Sun 03:29:24 AM	-34.1406	153.0467	← 278°	468.0	539.0	38000.0	63 Climbing	Aus ATC (ADS-B)
Sun 03:29:29 AM	-34.1391	153.0337	← 278°	468.0	539.0	38000.0	-136 Descending	Aus ATC (ADS-B)
Sun 03:29:35 AM	-34.1372	153.0175	← 278°	467.0	537.0	37975.0	Level	FlightAware ADS-B (SYD / YSSY)
Sun 03:29:39 AM	-34.136	153.0079	← 278°	467.0	537.0	38000.0	83 Climbing	Aus ATC (ADS-B)
Sun 03:29:53 AM	-34.1319	152.9737	← 278°	465.0	535.0	38000.0	Level	Aus ATC (ADS-B)
Sun 03:30:04 AM	-34.1284	152.9441	← 278°	465.0	535.0	38000.0	-125 Descending	Aus ATC (ADS-B)
Sun 03:30:05 AM	-34.1283	152.9434	← 278°	465.0	535.0	37975.0	Level	FlightAware ADS-B (SYD / YSSY)
Sun 03:30:08 AM	-34.1273	152.9354	← 279°	465.0	535.0	38000.0	107 Climbing	Aus ATC (ADS-B)
Sun 03:30:19 AM	-34.1237	152.9058	← 278°	464.0	534.0	38000.0	Level	Aus ATC (ADS-B)
Sun 03:30:29 AM	-34.1206	152.88	← 278°	464.0	534.0	38000.0	Level	Aus ATC (ADS-B)
Sun 03:30:34 AM	-34.1191	152.8672	← 278°	463.0	533.0	38000.0	Level	Aus ATC (ADS-B)
Sun 03:30:36 AM	-34.1187	152.8642	← 279°	462.0	532.0	38000.0	Level	FlightAware ADS-B (YWST)
Sun 03:30:43 AM	-34.1165	152.8457	← 278°	463.0	533.0	38000.0	Level	Aus ATC (ADS-B)
Sun 03:30:49 AM	-34.1144	152.829	← 278°	463.0	533.0	38000.0	Level	Aus ATC (ADS-B)
Sun 03:30:54 AM	-34.1129	152.8163	← 278°	462.0	532.0	38000.0	Level	Aus ATC (ADS-B)
Sun 03:31:04 AM	-34.1098	152.791	← 279°	462.0	532.0	38000.0	Level	Aus ATC (ADS-B)
Sun 03:31:07 AM	-34.1087	152.7824	← 279°	462.0	532.0	38000.0	Level	Aus ATC (ADS-B)
Sun 03:31:19 AM	-34.1052	152.753	← 278°	462.0	532.0	38000.0	Level	Aus ATC (ADS-B)
Sun 03:31:34 AM	-34.1005	152.7149	← 278°	461.0	531.0	38000.0	Level	Aus ATC (ADS-B)
Sun 03:31:36 AM	-34.1	152.7106	← 279°	461.0	531.0	38000.0	Level	FlightAware ADS-B (SYD / YSSY)
Sun 03:31:44 AM	-34.0974	152.6894	← 278°	461.0	531.0	38000.0	Level	Aus ATC (ADS-B)
Sun 03:31:49 AM	-34.0959	152.6772	← 278°	461.0	531.0	38000.0	Level	Aus ATC (ADS-B)
Sun 03:32:04 AM	-34.0912	152.639	← 279°	460.0	529.0	38000.0	Level	Aus ATC (ADS-B)
Sun 03:32:06 AM	-34.0906	152.6345	← 279°	460.0	529.0	38000.0	Level	FlightAware ADS-B (SYD / YSSY)
Sun 03:32:09 AM	-34.0896	152.6263	← 278°	460.0	529.0	38000.0	Level	Aus ATC (ADS-B)
Sun 03:32:19 AM	-34.0865	152.6011	← 279°	460.0	529.0	38000.0	Level	Aus ATC (ADS-B)
Sun 03:32:24 AM	-34.085	152.5883	← 278°	461.0	531.0	38000.0	Level	Aus ATC (ADS-B)
Sun 03:32:34 AM	-34.082	152.563	← 278°	460.0	529.0	38000.0	Level	Aus ATC (ADS-B)
Sun 03:32:37 AM	-34.0811	152.5549	← 278°	460.0	529.0	38000.0	Level	FlightAware ADS-B (YSRI)
Sun 03:32:53 AM	-34.0769	152.5145	← 277°	460.0	529.0	38000.0	Level	FlightAware ADS-B (YWST)
Sun 03:33:17 AM	-34.0712	152.4528	← 276°	460.0	529.0	38000.0	Level	Aus ATC (ADS-B)
Sun 03:33:24 AM	-34.0697	152.4361	← 276°	461.0	531.0	38000.0	Level	Aus ATC (ADS-B)
Sun 03:33:29 AM	-34.0686	152.4234	← 276°	461.0	531.0	38000.0	Level	Aus ATC (ADS-B)
Sun 03:33:37 AM	-34.0666	152.4018	← 277°	461.0	531.0	38000.0	Level	Aus ATC (ADS-B)
Sun 03:33:44 AM	-34.0651	152.3851	← 276°	462.0	532.0	38000.0	Level	Aus ATC (ADS-B)
Sun 03:33:53 AM	-34.0628	152.3608	← 277°	462.0	532.0	38000.0	Level	FlightAware ADS-B (SYD / YSSY)
Sun 03:34:24 AM	-34.0554	152.2816	← 276°	464.0	534.0	38000.0	Level	FlightAware ADS-B (YSGT)
Sun 03:34:27 AM	-34.0547	152.2741	← 276°	464.0	534.0	38000.0	Level	Aus ATC (ADS-B)
Sun 03:34:29 AM	-34.0543	152.2699	← 276°	464.0	534.0	38000.0	Level	Aus ATC (ADS-B)
Sun 03:34:39 AM	-34.0519	152.2445	← 277°	464.0	534.0	38000.0	Level	Aus ATC (ADS-B)
Sun 03:34:44 AM	-34.0506	152.2315	← 277°	464.0	534.0	38000.0	Level	Aus ATC (ADS-B)
Sun 03:34:45 AM	-34.0504	152.2285	← 278°	464.0	534.0	38000.0	Level	FlightAware ADS-B (YSMB)
Sun 03:34:52 AM	-34.0486	152.21	← 277°	464.0	534.0	38000.0	Level	Aus ATC (ADS-B)
Sun 03:35:04 AM	-34.0457	152.1804	← 277°	464.0	534.0	38000.0	Level	Aus ATC (ADS-B)
Sun 03:35:12 AM	-34.0436	152.1587	← 277°	464.0	534.0	38000.0	Level	Aus ATC (ADS-B)
Sun 03:35:17 AM	-34.0424	152.1459	← 276°	464.0	534.0	38000.0	-150 Descending	Aus ATC (ADS-B)
Sun 03:35:22 AM	-34.0411	152.1328	← 278°	463.0	533.0	37975.0	Level	FlightAware ADS-B (YWST)
Sun 03:35:27 AM	-34.0399	152.1203	← 276°	463.0	533.0	38000.0	214 Climbing	Aus ATC (ADS-B)
Sun 03:35:29 AM	-34.0395	152.1163	← 277°	463.0	533.0	38000.0	-88 Descending	Aus ATC (ADS-B)
Sun 03:35:44 AM	-34.0357	152.0775	← 277°	462.0	532.0	37975.0	-42 Descending	FlightAware ADS-B (SYD / YSSY)
Sun 03:36:05 AM	-34.0307	152.0257	← 278°	462.0	532.0	37975.0	43 Climbing	FlightAware ADS-B (YSMB)
Sun 03:36:19 AM	-34.027	151.9888	← 277°	461.0	531.0	38000.0	79 Climbing	Aus ATC (ADS-B)
Sun 03:36:24 AM	-34.0257	151.9762	← 277°	461.0	531.0	38000.0	-250 Descending	Aus ATC (ADS-B)
Sun 03:36:25 AM	-34.0253	151.9724	← 277°	461.0	531.0	37975.0	Level	FlightAware ADS-B (BWU / YSBK)
Sun 03:36:32 AM	-34.0236	151.9546	← 277°	461.0	531.0	38000.0	107 Climbing	Aus ATC (ADS-B)
Sun 03:36:39 AM	-34.0219	151.938	← 277°	461.0	531.0	38000.0	Level	Aus ATC (ADS-B)
Sun 03:36:44 AM	-34.0206	151.9254	← 277°	461.0	531.0	38000.0	-115 Descending	Aus ATC (ADS-B)
Sun 03:36:52 AM	-34.0185	151.904	← 277°	460.0	529.0	37975.0	Level	FlightAware ADS-B (TMW / YSTW)
Sun 03:37:22 AM	-34.0107	151.8278	← 277°	461.0	531.0	38000.0	48 Climbing	Aus ATC (ADS-B)
Sun 03:37:23 AM	-34.0103	151.8238	← 277°	461.0	531.0	38000.0	-50 Descending	Aus ATC (ADS-B)
Sun 03:37:52 AM	-34.0026	151.7483	← 277°	460.0	529.0	37975.0	Level	FlightAware ADS-B (YKAT)
Sun 03:38:11 AM	-33.9992	151.703	← 274°	460.0	529.0	38000.0	48 Climbing	FlightAware ADS-B (YSGT)
Sun 03:38:23 AM	-33.9983	151.6713	← 272°	460.0	529.0	38000.0	Level	Aus ATC (ADS-B)
Sun 03:38:27 AM	-33.9983	151.6624	← 270°	461.0	531.0	38000.0	Level	Aus ATC (ADS-B)
Sun 03:38:37 AM	-33.9989	151.6369	← 268°	461.0	531.0	38000.0	Level	Aus ATC (ADS-B)
Sun 03:38:38 AM	-33.999	151.6329	← 268°	461.0	531.0	38000.0	Level	Aus ATC (ADS-B)
Sun 03:38:48 AM	-34.0006	151.6074	← 266°	461.0	531.0	38000.0	Level	Aus ATC (ADS-B)
Sun 03:38:51 AM	-34.0011	151.6004	← 266°	460.0	529.0	38000.0	Level	FlightAware ADS-B (SYD / YSSY)
Sun 03:38:53 AM	-34.0015	151.5947	← 264°	461.0	531.0	38000.0	Level	Aus ATC (ADS-B)
Sun 03:39:16 AM	-34.0056	151.5348	← 266°	460.0	529.0	38000.0	-38 Descending	FlightAware ADS-B (YGNB)
Sun 03:39:33 AM	-34.0082	151.495	← 266°	460.0	529.0	37975.0	Level	FlightAware ADS-B (YTCN)
Sun 03:40:03 AM	-34.0133	151.4166	← 266°	459.0	528.0	38000.0	33 Climbing	FlightAware ADS-B (BWU / YSBK)
Sun 03:40:18 AM	-34.0158	151.3782	← 265°	458.0	527.0	38000.0	Level	Aus ATC (ADS-B)
Sun 03:40:23 AM	-34.0167	151.3655	← 265°	458.0	527.0	38000.0	Level	Aus ATC (ADS-B)
Sun 03:40:28 AM	-34.0175	151.353	← 266°	458.0	527.0	38000.0	Level	Aus ATC (ADS-B)
Sun 03:40:33 AM	-34.0183	151.34	← 266°	457.0	526.0	38000.0	Level	FlightAware ADS-B (SYD / YSSY)
Sun 03:40:38 AM	-34.0191	151.3276	← 265°	457.0	526.0	38000.0	Level	Aus ATC (ADS-B)
Sun 03:40:43 AM	-34.02	151.3148	← 265°	457.0	526.0	38000.0	Level	Aus ATC (ADS-B)
Sun 03:40:53 AM	-34.0216	151.2896	← 266°	456.0	525.0	38000.0	Level	Aus ATC (ADS-B)
Sun 03:41:08 AM	-34.0241	151.2517	← 266°	456.0	525.0	38000.0	Level	Aus ATC (ADS-B)
Sun 03:41:15 AM	-34.0252	151.2349	← 266°	457.0	526.0	38000.0	-56 Descending	FlightAware ADS-B (YWST)
Sun 03:41:35 AM	-34.0286	151.1827	← 267°	457.0	526.0	37975.0	Level	FlightAware ADS-B (YWST)
Sun 03:41:43 AM	-34.0298	151.1632	← 266°	457.0	526.0	38000.0	88 Climbing	Aus ATC (ADS-B)
Sun 03:41:52 AM	-34.0311	151.1418	← 266°	456.0	525.0	38000.0	Level	Aus ATC (ADS-B)
Sun 03:41:58 AM	-34.0322	151.1253	← 265°	456.0	525.0	38000.0	Level	Aus ATC (ADS-B)
Sun 03:42:03 AM	-34.033	151.1127	← 265°	456.0	525.0	38000.0	-214 Descending	Aus ATC (ADS-B)
Sun 03:42:05 AM	-34.0334	151.1068	← 267°	456.0	525.0	37975.0	Level	FlightAware ADS-B (YWST)
Sun 03:42:08 AM	-34.0338	151.1001	← 266°	456.0	525.0	38000.0	115 Climbing	Aus ATC (ADS-B)
Sun 03:42:18 AM	-34.0355	151.0747	← 265°	455.0	524.0	38000.0	Level	Aus ATC (ADS-B)
Sun 03:42:21 AM	-34.036	151.0662	← 265°	455.0	524.0	38000.0	Level	Aus ATC (ADS-B)
Sun 03:42:25 AM	-34.0367	151.0555	← 266°	455.0	524.0	38000.0	Level	FlightAware ADS-B (SYD / YSSY)
Sun 03:42:36 AM	-34.0384	151.0282	← 266°	455.0	524.0	38000.0	Level	Aus ATC (ADS-B)
Sun 03:42:43 AM	-34.0395	151.0113	← 266°	455.0	524.0	38000.0	Level	FlightAware ADS-B (YGNB)
Sun 03:42:48 AM	-34.0402	150.9991	← 266°	455.0	524.0	38000.0	Level	Aus ATC (ADS-B)
Sun 03:43:01 AM	-34.0424	150.9653	← 266°	454.0	522.0	38000.0	Level	Aus ATC (ADS-B)
Sun 03:43:03 AM	-34.0426	150.9614	← 266°	453.0	521.0	38000.0	-188 Descending	Aus ATC (ADS-B)
Sun 03:43:09 AM	-34.0435	150.9476	← 267°	453.0	521.0	37975.0	Level	FlightAware ADS-B (YRSH)
Sun 03:43:13 AM	-34.0442	150.9362	← 266°	452.0	520.0	38000.0	167 Climbing	Aus ATC (ADS-B)
Sun 03:43:18 AM	-34.0449	150.9238	← 266°	452.0	520.0	38000.0	-125 Descending	Aus ATC (ADS-B)
Sun 03:43:25 AM	-34.046	150.9067	← 267°	451.0	519.0	37975.0	-60 Descending	FlightAware ADS-B (YOBE)
Sun 03:43:43 AM	-34.0488	150.8604	← 267°	451.0	519.0	37975.0	42 Climbing	FlightAware ADS-B (SYD / YSSY)
Sun 03:44:01 AM	-34.0515	150.8152	← 266°	452.0	520.0	38000.0	75 Climbing	Aus ATC (ADS-B)
Sun 03:44:03 AM	-34.0518	150.8112	← 264°	452.0	520.0	38000.0	Level	Aus ATC (ADS-B)
Sun 03:44:13 AM	-34.0535	150.7842	← 266°	453.0	521.0	38000.0	Level	FlightAware ADS-B (YRAY)
Sun 03:44:16 AM	-34.0539	150.7776	← 266°	453.0	521.0	38000.0	Level	Aus ATC (ADS-B)
Sun 03:44:28 AM	-34.0557	150.7486	← 266°	453.0	521.0	38000.0	Level	Aus ATC (ADS-B)
Sun 03:44:31 AM	-34.0562	150.74	← 266°	453.0	521.0	38000.0	-250 Descending	Aus ATC (ADS-B)
Sun 03:44:34 AM	-34.0564	150.736	← 266°	453.0	521.0	37975.0	Level	FlightAware ADS-B (CDU / YSCN)
Sun 03:44:41 AM	-34.0577	150.7149	← 266°	452.0	520.0	38000.0	167 Climbing	Aus ATC (ADS-B)
Sun 03:44:43 AM	-34.0579	150.711	← 266°	452.0	520.0	38000.0	Level	Aus ATC (ADS-B)
Sun 03:44:50 AM	-34.059	150.6943	← 266°	452.0	520.0	38000.0	Level	FlightAware ADS-B (YWST)
Sun 03:44:53 AM	-34.0595	150.6861	← 266°	452.0	520.0	38000.0	Level	Aus ATC (ADS-B)
Sun 03:44:58 AM	-34.0602	150.6735	← 266°	452.0	520.0	38000.0	Level	Aus ATC (ADS-B)
Sun 03:45:06 AM	-34.0615	150.6525	← 266°	452.0	520.0	38000.0	Level	Aus ATC (ADS-B)
Sun 03:45:13 AM	-34.0625	150.6358	← 266°	452.0	520.0	38000.0	Level	Aus ATC (ADS-B)
Sun 03:45:18 AM	-34.0632	150.6233	← 266°	451.0	519.0	38000.0	-214 Descending	Aus ATC (ADS-B)
Sun 03:45:20 AM	-34.0637	150.6158	← 266°	451.0	519.0	37975.0	Level	FlightAware ADS-B (YWST)
Sun 03:45:53 AM	-34.0685	150.5346	← 267°	449.0	517.0	38000.0	31 Climbing	FlightAware ADS-B (SYD / YSSY)
Sun 03:46:08 AM	-34.0706	150.4986	← 266°	448.0	516.0	38000.0	Level	Aus ATC (ADS-B)
Sun 03:46:13 AM	-34.0713	150.4863	← 266°	449.0	517.0	38000.0	Level	Aus ATC (ADS-B)
Sun 03:46:23 AM	-34.0727	150.4615	← 266°	449.0	517.0	38000.0	-136 Descending	Aus ATC (ADS-B)
Sun 03:46:24 AM	-34.0729	150.4574	← 267°	449.0	517.0	37975.0	Level	FlightAware ADS-B (YRAY)
Sun 03:46:28 AM	-34.0734	150.4489	← 265°	449.0	517.0	38000.0	167 Climbing	Aus ATC (ADS-B)
Sun 03:46:33 AM	-34.0741	150.4364	← 266°	450.0	518.0	38000.0	Level	Aus ATC (ADS-B)
Sun 03:46:43 AM	-34.0756	150.4115	← 266°	450.0	518.0	38000.0	Level	Aus ATC (ADS-B)
Sun 03:46:48 AM	-34.0763	150.399	← 266°	451.0	519.0	38000.0	Level	Aus ATC (ADS-B)
Sun 03:46:54 AM	-34.0774	150.3796	← 267°	451.0	519.0	38000.0	Level	FlightAware ADS-B (CBR / YSCB)
Sun 03:46:58 AM	-34.0777	150.3741	← 266°	451.0	519.0	38000.0	Level	Aus ATC (ADS-B)
Sun 03:47:01 AM	-34.0782	150.3656	← 266°	450.0	518.0	38000.0	Level	Aus ATC (ADS-B)
Sun 03:47:13 AM	-34.0799	150.3367	← 266°	450.0	518.0	38000.0	Level	Aus ATC (ADS-B)
Sun 03:47:28 AM	-34.082	150.2995	← 266°	449.0	517.0	38000.0	Level	Aus ATC (ADS-B)
Sun 03:47:37 AM	-34.0834	150.2746	← 266°	448.0	516.0	38000.0	Level	Aus ATC (ADS-B)
Sun 03:47:41 AM	-34.0839	150.2661	← 266°	448.0	516.0	38000.0	Level	Aus ATC (ADS-B)
Sun 03:47:53 AM	-34.0855	150.2374	← 266°	448.0	516.0	38000.0	Level	Aus ATC (ADS-B)
Sun 03:47:55 AM	-34.0859	150.2314	← 266°	448.0	516.0	38000.0	Level	FlightAware ADS-B (YRPA)
Sun 03:47:56 AM	-34.086	150.2288	← 265°	448.0	516.0	38000.0	Level	Aus ATC (ADS-B)
Sun 03:48:02 AM	-34.0869	150.2125	← 266°	448.0	516.0	38000.0	Level	Aus ATC (ADS-B)
Sun 03:48:25 AM	-34.0902	150.1551	← 266°	447.0	514.0	38000.0	-28 Descending	FlightAware ADS-B (SYD / YSSY)
Sun 03:48:55 AM	-34.0942	150.0817	← 266°	445.0	512.0	37975.0	Level	FlightAware ADS-B (YRAY)
Sun 03:49:25 AM	-34.0983	150.008	← 266°	445.0	512.0	38000.0	32 Climbing	FlightAware ADS-B (YSRI)
Sun 03:49:42 AM	-34.1006	149.9654	← 266°	445.0	512.0	38000.0	Level	Aus ATC (ADS-B)
Sun 03:49:52 AM	-34.1019	149.9408	← 266°	444.0	511.0	38000.0	Level	Aus ATC (ADS-B)
Sun 03:49:57 AM	-34.1026	149.9286	← 266°	444.0	511.0	38000.0	Level	Aus ATC (ADS-B)
Sun 03:50:07 AM	-34.1039	149.9039	← 266°	443.0	510.0	38000.0	-48 Descending	Aus ATC (ADS-B)
Sun 03:50:28 AM	-34.1068	149.8496	← 266°	443.0	510.0	37975.0	-29 Descending	FlightAware ADS-B (YMIG)
Sun 03:50:59 AM	-34.1106	149.7767	← 266°	443.0	510.0	37975.0	38 Climbing	FlightAware ADS-B (CBR / YSCB)
Sun 03:51:07 AM	-34.1117	149.7564	← 266°	443.0	510.0	38000.0	115 Climbing	Aus ATC (ADS-B)
Sun 03:51:12 AM	-34.1123	149.7441	← 266°	443.0	510.0	38000.0	Level	Aus ATC (ADS-B)
Sun 03:51:22 AM	-34.1136	149.7196	← 266°	443.0	510.0	38000.0	Level	Aus ATC (ADS-B)
Sun 03:51:26 AM	-34.1141	149.7111	← 266°	443.0	510.0	38000.0	Level	Aus ATC (ADS-B)
Sun 03:51:29 AM	-34.1146	149.7009	← 266°	443.0	510.0	38000.0	Level	FlightAware ADS-B (YMIG)
Sun 03:51:37 AM	-34.1156	149.6826	← 266°	443.0	510.0	38000.0	Level	Aus ATC (ADS-B)
Sun 03:51:59 AM	-34.1185	149.6263	← 267°	444.0	511.0	38000.0	Level	FlightAware ADS-B (BWU / YSBK)
Sun 03:52:29 AM	-34.1221	149.5545	← 267°	444.0	511.0	38000.0	Level	FlightAware ADS-B (SYD / YSSY)
Sun 03:52:50 AM	-34.1248	149.5021	← 266°	443.0	510.0	38000.0	Level	Aus ATC (ADS-B)
Sun 03:52:55 AM	-34.1254	149.4898	← 266°	443.0	510.0	38000.0	-250 Descending	Aus ATC (ADS-B)
Sun 03:52:56 AM	-34.1255	149.4892	← 267°	443.0	510.0	37975.0	Level	FlightAware ADS-B (YOBE)
Sun 03:53:07 AM	-34.1268	149.4614	← 267°	443.0	510.0	38000.0	63 Climbing	Aus ATC (ADS-B)
Sun 03:53:20 AM	-34.1285	149.4282	← 266°	443.0	510.0	38000.0	Level	Aus ATC (ADS-B)
Sun 03:53:26 AM	-34.1291	149.4154	← 267°	443.0	510.0	38000.0	Level	FlightAware ADS-B (SYD / YSSY)
Sun 03:53:32 AM	-34.1299	149.3999	← 266°	442.0	509.0	38000.0	Level	Aus ATC (ADS-B)
Sun 03:53:35 AM	-34.1303	149.3915	← 267°	442.0	509.0	38000.0	Level	Aus ATC (ADS-B)
Sun 03:53:45 AM	-34.1315	149.367	← 266°	442.0	509.0	38000.0	Level	Aus ATC (ADS-B)
Sun 03:53:50 AM	-34.1321	149.3548	← 267°	442.0	509.0	38000.0	Level	Aus ATC (ADS-B)
Sun 03:53:57 AM	-34.1329	149.3387	← 267°	441.0	507.0	38000.0	Level	Aus ATC (ADS-B)
Sun 03:54:02 AM	-34.1335	149.3265	← 267°	441.0	507.0	38000.0	Level	Aus ATC (ADS-B)
Sun 03:54:10 AM	-34.1345	149.306	← 267°	441.0	507.0	38000.0	Level	Aus ATC (ADS-B)
Sun 03:54:17 AM	-34.1353	149.2899	← 267°	441.0	507.0	38000.0	Level	Aus ATC (ADS-B)
Sun 03:54:22 AM	-34.1359	149.2774	← 267°	441.0	507.0	38000.0	Level	Aus ATC (ADS-B)
Sun 03:54:35 AM	-34.1375	149.2446	← 267°	442.0	509.0	38000.0	Level	Aus ATC (ADS-B)
Sun 03:54:38 AM	-34.1377	149.2402	← 267°	442.0	509.0	38000.0	Level	FlightAware ADS-B (SYD / YSSY)
Sun 03:54:47 AM	-34.1388	149.2163	← 267°	442.0	509.0	38000.0	Level	Aus ATC (ADS-B)
Sun 03:54:57 AM	-34.14	149.1917	← 268°	440.0	506.0	38000.0	Level	FlightAware ADS-B (YWST)
Sun 03:55:00 AM	-34.1404	149.1834	← 266°	441.0	507.0	38000.0	Level	Aus ATC (ADS-B)
Sun 03:55:02 AM	-34.1406	149.1796	← 266°	441.0	507.0	38000.0	Level	Aus ATC (ADS-B)
Sun 03:55:12 AM	-34.1418	149.1551	← 267°	441.0	507.0	38000.0	Level	Aus ATC (ADS-B)
Sun 03:55:17 AM	-34.1424	149.1429	← 267°	442.0	509.0	38000.0	Level	Aus ATC (ADS-B)
Sun 03:55:23 AM	-34.1431	149.1272	← 268°	441.0	507.0	38000.0	Level	FlightAware ADS-B (SYD / YSSY)
Sun 03:55:27 AM	-34.1435	149.1183	← 267°	442.0	509.0	38000.0	Level	Aus ATC (ADS-B)
Sun 03:55:32 AM	-34.1441	149.1061	← 267°	442.0	509.0	38000.0	Level	Aus ATC (ADS-B)
Sun 03:55:40 AM	-34.145	149.0855	← 267°	442.0	509.0	38000.0	Level	Aus ATC (ADS-B)
Sun 03:55:47 AM	-34.1458	149.0693	← 266°	442.0	509.0	38000.0	Level	Aus ATC (ADS-B)
Sun 03:55:55 AM	-34.1468	149.0487	← 267°	443.0	510.0	38000.0	Level	Aus ATC (ADS-B)
Sun 03:55:58 AM	-34.147	149.0434	← 267°	443.0	510.0	38000.0	Level	FlightAware ADS-B (CBR / YSCB)
Sun 03:56:02 AM	-34.1475	149.0325	← 267°	443.0	510.0	38000.0	Level	Aus ATC (ADS-B)
Sun 03:56:07 AM	-34.1481	149.0202	← 267°	443.0	510.0	38000.0	Level	Aus ATC (ADS-B)
Sun 03:56:17 AM	-34.1492	148.9957	← 267°	443.0	510.0	38000.0	Level	Aus ATC (ADS-B)
Sun 03:56:20 AM	-34.1496	148.9872	← 267°	443.0	510.0	38000.0	Level	Aus ATC (ADS-B)
Sun 03:56:32 AM	-34.1509	148.9587	← 267°	443.0	510.0	38000.0	-107 Descending	Aus ATC (ADS-B)
Sun 03:56:34 AM	-34.1512	148.9534	← 268°	442.0	509.0	37975.0	Level	FlightAware ADS-B (CBR / YSCB)
Sun 03:56:45 AM	-34.1524	148.9259	← 267°	443.0	510.0	38000.0	Level	Aus ATC (ADS-B)
Sun 03:57:04 AM	-34.1546	148.8786	← 267°	443.0	510.0	37975.0	Level	FlightAware ADS-B (YXLG)
Sun 03:57:22 AM	-34.1565	148.8359	← 267°	443.0	510.0	38000.0	58 Climbing	Aus ATC (ADS-B)
Sun 03:57:30 AM	-34.1574	148.8152	← 267°	443.0	510.0	38000.0	Level	Aus ATC (ADS-B)
Sun 03:57:37 AM	-34.1581	148.7991	← 267°	443.0	510.0	38000.0	Level	Aus ATC (ADS-B)
Sun 03:57:45 AM	-34.159	148.7785	← 267°	443.0	510.0	38000.0	Level	Aus ATC (ADS-B)
Sun 03:57:47 AM	-34.1592	148.7746	← 266°	443.0	510.0	38000.0	Level	Aus ATC (ADS-B)
Sun 03:58:00 AM	-34.1607	148.7415	← 267°	444.0	511.0	38000.0	Level	Aus ATC (ADS-B)
Sun 03:58:01 AM	-34.1609	148.7375	← 267°	444.0	511.0	38000.0	Level	Aus ATC (ADS-B)
Sun 03:58:04 AM	-34.1612	148.7313	← 268°	443.0	510.0	38000.0	-45 Descending	FlightAware ADS-B (CBR / YSCB)
Sun 03:58:34 AM	-34.1643	148.6583	← 267°	444.0	511.0	37975.0	Level	FlightAware ADS-B (CBR / YSCB)
Sun 03:58:40 AM	-34.165	148.6429	← 267°	445.0	512.0	38000.0	83 Climbing	Aus ATC (ADS-B)
Sun 03:58:52 AM	-34.1662	148.6142	← 267°	446.0	513.0	38000.0	Level	Aus ATC (ADS-B)
Sun 03:58:54 AM	-34.1665	148.6082	← 268°	447.0	514.0	38000.0	Level	FlightAware ADS-B (YOBE)
Sun 03:59:24 AM	-34.1698	148.5323	← 268°	446.0	513.0	38000.0	Level	FlightAware ADS-B (YOBE)
Sun 03:59:30 AM	-34.1703	148.5188	← 267°	446.0	513.0	38000.0	Level	Aus ATC (ADS-B)
Sun 03:59:41 AM	-34.1716	148.4902	← 267°	445.0	512.0	38000.0	Level	Aus ATC (ADS-B)
Sun 03:59:45 AM	-34.1719	148.4818	← 268°	445.0	512.0	38000.0	Level	Aus ATC (ADS-B)
Sun 03:59:55 AM	-34.1729	148.457	← 267°	444.0	511.0	38000.0	Level	Aus ATC (ADS-B)
Sun 04:00:00 AM	-34.1734	148.4448	← 267°	444.0	511.0	38000.0	Level	Aus ATC (ADS-B)
Sun 04:00:06 AM	-34.1741	148.4286	← 267°	443.0	510.0	38000.0	Level	Aus ATC (ADS-B)
Sun 04:00:20 AM	-34.1755	148.3956	← 267°	442.0	509.0	38000.0	Level	Aus ATC (ADS-B)
Sun 04:00:24 AM	-34.1759	148.3859	← 267°	442.0	509.0	38000.0	Level	FlightAware ADS-B (CBR / YSCB)
Sun 04:00:30 AM	-34.1764	148.3712	← 267°	441.0	507.0	38000.0	Level	Aus ATC (ADS-B)
Sun 04:00:55 AM	-34.1788	148.3124	← 268°	440.0	506.0	38000.0	Level	FlightAware ADS-B (CBR / YSCB)
Sun 04:01:25 AM	-34.182	148.2356	← 268°	443.0	510.0	38000.0	Level	FlightAware ADS-B (YOBE)
Sun 04:01:41 AM	-34.1835	148.1952	← 267°	445.0	512.0	38000.0	-50 Descending	Aus ATC (ADS-B)
Sun 04:01:55 AM	-34.1849	148.1615	← 268°	444.0	511.0	37975.0	Level	FlightAware ADS-B (YOBE)
Sun 04:02:30 AM	-34.1882	148.0759	← 268°	444.0	511.0	38000.0	Level	FlightAware ADS-B (ABX / YMAY)
Sun 04:03:01 AM	-34.1912	147.9985	← 267°	444.0	511.0	37975.0	Level	FlightAware ADS-B (YSRI)
Sun 04:03:06 AM	-34.1917	147.9855	← 267°	443.0	510.0	38000.0	188 Climbing	Aus ATC (ADS-B)
Sun 04:03:09 AM	-34.192	147.9771	← 267°	443.0	510.0	38000.0	Level	Aus ATC (ADS-B)
Sun 04:03:19 AM	-34.193	147.9525	← 267°	443.0	510.0	38000.0	Level	Aus ATC (ADS-B)
Sun 04:03:24 AM	-34.1934	147.9402	← 268°	443.0	510.0	38000.0	Level	Aus ATC (ADS-B)
Sun 04:03:31 AM	-34.194	147.924	← 267°	443.0	510.0	38000.0	Level	Aus ATC (ADS-B)
Sun 04:03:32 AM	-34.1941	147.9214	← 268°	442.0	509.0	38000.0	Level	FlightAware ADS-B (CBR / YSCB)
Sun 04:03:39 AM	-34.1948	147.9034	← 267°	441.0	507.0	38000.0	Level	Aus ATC (ADS-B)
Sun 04:03:44 AM	-34.1953	147.8909	← 267°	441.0	507.0	38000.0	Level	Aus ATC (ADS-B)
Sun 04:03:48 AM	-34.1956	147.8825	← 268°	440.0	506.0	38000.0	Level	FlightAware ADS-B (YMIG)
Sun 04:03:54 AM	-34.1961	147.8666	← 268°	440.0	506.0	38000.0	Level	Aus ATC (ADS-B)
Sun 04:03:56 AM	-34.1963	147.8628	← 266°	440.0	506.0	38000.0	Level	Aus ATC (ADS-B)
Sun 04:04:06 AM	-34.1972	147.8384	← 268°	438.0	504.0	38000.0	Level	Aus ATC (ADS-B)
Sun 04:04:09 AM	-34.1975	147.8299	← 267°	438.0	504.0	38000.0	-136 Descending	Aus ATC (ADS-B)
Sun 04:04:17 AM	-34.1982	147.8116	← 268°	438.0	504.0	37975.0	Level	FlightAware ADS-B (CBR / YSCB)
Sun 04:04:21 AM	-34.1985	147.8019	← 268°	437.0	503.0	38000.0	79 Climbing	Aus ATC (ADS-B)
Sun 04:04:36 AM	-34.1999	147.7653	← 267°	436.0	502.0	38000.0	-94 Descending	Aus ATC (ADS-B)
Sun 04:04:37 AM	-34.1999	147.7637	← 269°	436.0	502.0	37975.0	Level	FlightAware ADS-B (SYD / YSSY)
Sun 04:04:46 AM	-34.2007	147.7412	← 268°	436.0	502.0	38000.0	107 Climbing	Aus ATC (ADS-B)
Sun 04:04:51 AM	-34.2012	147.7291	← 267°	436.0	502.0	38000.0	Level	Aus ATC (ADS-B)
Sun 04:05:01 AM	-34.202	147.7048	← 268°	436.0	502.0	38000.0	Level	Aus ATC (ADS-B)
Sun 04:05:06 AM	-34.2025	147.6927	← 267°	435.0	501.0	38000.0	Level	Aus ATC (ADS-B)
Sun 04:05:14 AM	-34.2032	147.6722	← 268°	435.0	501.0	38000.0	Level	Aus ATC (ADS-B)
Sun 04:05:21 AM	-34.2037	147.6563	← 268°	435.0	501.0	38000.0	Level	Aus ATC (ADS-B)
Sun 04:05:26 AM	-34.2041	147.6443	← 267°	435.0	501.0	38000.0	-167 Descending	Aus ATC (ADS-B)
Sun 04:05:30 AM	-34.2045	147.6349	← 269°	435.0	501.0	37975.0	Level	FlightAware ADS-B (YXLG)
Sun 04:05:39 AM	-34.2052	147.6119	← 268°	434.0	499.0	38000.0	71 Climbing	Aus ATC (ADS-B)
Sun 04:05:51 AM	-34.2063	147.582	← 268°	432.0	497.0	38000.0	100 Climbing	FlightAware ADS-B (YMIG)
Sun 04:06:09 AM	-34.2079	147.5389	← 268°	431.0	496.0	38050.0	316 Climbing	FlightAware ADS-B (CWT / YCWR)
Sun 04:06:29 AM	-34.2095	147.4917	← 268°	431.0	496.0	38200.0	652 Climbing	Aus ATC (ADS-B)
Sun 04:06:32 AM	-34.2097	147.4849	← 268°	431.0	496.0	38300.0	857 Climbing	FlightAware ADS-B (WGA / YSWG)
Sun 04:06:36 AM	-34.21	147.4761	← 268°	431.0	496.0	38300.0	667 Climbing	Aus ATC (ADS-B)
Sun 04:06:41 AM	-34.2104	147.464	← 268°	430.0	495.0	38400.0	706 Climbing	Aus ATC (ADS-B)
Sun 04:06:53 AM	-34.2111	147.4401	← 268°	430.0	495.0	38500.0	923 Climbing	Aus ATC (ADS-B)
Sun 04:06:54 AM	-34.2114	147.4318	← 267°	430.0	495.0	38600.0	1,385 Climbing	Aus ATC (ADS-B)
Sun 04:07:06 AM	-34.2124	147.4042	← 267°	429.0	494.0	38800.0	750 Climbing	Aus ATC (ADS-B)
Sun 04:07:12 AM	-34.2129	147.3898	← 268°	429.0	494.0	38825.0	400 Climbing	FlightAware ADS-B (WGA / YSWG)
Sun 04:07:21 AM	-34.2137	147.3683	← 268°	429.0	494.0	38900.0	553 Climbing	Aus ATC (ADS-B)
Sun 04:07:31 AM	-34.2144	147.3446	← 268°	430.0	495.0	39000.0	800 Climbing	Aus ATC (ADS-B)
Sun 04:07:36 AM	-34.2148	147.3325	← 268°	430.0	495.0	39100.0	800 Climbing	Aus ATC (ADS-B)
Sun 04:07:46 AM	-34.2155	147.3087	← 268°	430.0	495.0	39200.0	800 Climbing	Aus ATC (ADS-B)
Sun 04:07:51 AM	-34.2158	147.2968	← 268°	429.0	494.0	39300.0	923 Climbing	Aus ATC (ADS-B)
Sun 04:07:59 AM	-34.2164	147.2765	← 268°	429.0	494.0	39400.0	800 Climbing	Aus ATC (ADS-B)
Sun 04:08:06 AM	-34.217	147.261	← 268°	428.0	493.0	39500.0	1,000 Climbing	Aus ATC (ADS-B)
Sun 04:08:11 AM	-34.2173	147.249	← 268°	427.0	491.0	39600.0	1,000 Climbing	Aus ATC (ADS-B)
Sun 04:08:12 AM	-34.2175	147.2449	← 268°	426.0	490.0	39600.0	1,200 Climbing	FlightAware ADS-B (WGA / YSWG)
Sun 04:08:21 AM	-34.2181	147.2253	← 268°	424.0	488.0	39800.0	1,000 Climbing	Aus ATC (ADS-B)
Sun 04:08:24 AM	-34.2183	147.2174	← 268°	424.0	488.0	39800.0	682 Climbing	Aus ATC (ADS-B)
Sun 04:08:32 AM	-34.219	147.1984	← 268°	422.0	486.0	39925.0	1,091 Climbing	FlightAware ADS-B (WGA / YSWG)
Sun 04:08:35 AM	-34.2192	147.1901	← 268°	422.0	486.0	40000.0	97 Climbing	Aus ATC (ADS-B)
Sun 04:09:03 AM	-34.2212	147.1272	← 269°	421.0	484.0	39975.0	Level	FlightAware ADS-B (NRA / YNAR)
Sun 04:09:20 AM	-34.2225	147.0847	← 268°	418.0	481.0	40000.0	68 Climbing	Aus ATC (ADS-B)
Sun 04:09:25 AM	-34.2229	147.0731	← 268°	417.0	480.0	40000.0	Level	Aus ATC (ADS-B)
Sun 04:09:33 AM	-34.2235	147.0529	← 268°	417.0	480.0	40000.0	Level	FlightAware ADS-B (MHU / YHOT)
Sun 04:09:34 AM	-34.2234	147.0538	→ 85°	417.0	480.0	40000.0	Level	Aus ATC (ADS-B)
Sun 04:09:39 AM	-34.2238	147.042	← 268°	416.0	479.0	40000.0	Level	Aus ATC (ADS-B)
Sun 04:09:49 AM	-34.2245	147.019	← 268°	416.0	479.0	40000.0	Level	Aus ATC (ADS-B)
Sun 04:09:50 AM	-34.2246	147.0152	← 268°	416.0	479.0	40000.0	-107 Descending	Aus ATC (ADS-B)
Sun 04:10:03 AM	-34.2254	146.9891	← 268°	415.0	478.0	39975.0	Level	FlightAware ADS-B (NRA / YNAR)
Sun 04:10:04 AM	-34.2255	146.9842	← 269°	415.0	478.0	40000.0	125 Climbing	Aus ATC (ADS-B)
Sun 04:10:15 AM	-34.2263	146.9575	← 268°	414.0	476.0	40000.0	Level	Aus ATC (ADS-B)
Sun 04:10:19 AM	-34.2265	146.9498	← 268°	414.0	476.0	40000.0	Level	Aus ATC (ADS-B)
Sun 04:10:30 AM	-34.2273	146.9231	← 268°	414.0	476.0	40000.0	Level	Aus ATC (ADS-B)
Sun 04:10:34 AM	-34.2276	146.9151	← 268°	414.0	476.0	40000.0	-250 Descending	Aus ATC (ADS-B)
Sun 04:10:36 AM	-34.2277	146.9111	← 268°	414.0	476.0	39975.0	Level	FlightAware ADS-B (CBR / YSCB)
Sun 04:10:49 AM	-34.2286	146.8805	← 268°	414.0	476.0	40000.0	79 Climbing	Aus ATC (ADS-B)
Sun 04:10:55 AM	-34.229	146.8653	← 268°	414.0	476.0	40000.0	Level	Aus ATC (ADS-B)
Sun 04:11:00 AM	-34.2293	146.854	← 268°	414.0	476.0	40000.0	Level	Aus ATC (ADS-B)
Sun 04:11:06 AM	-34.2297	146.8414	← 268°	414.0	476.0	40000.0	Level	FlightAware ADS-B (CBR / YSCB)
Sun 04:11:09 AM	-34.2299	146.8345	← 268°	414.0	476.0	40000.0	Level	Aus ATC (ADS-B)
Sun 04:11:15 AM	-34.2303	146.8194	← 268°	414.0	476.0	40000.0	Level	Aus ATC (ADS-B)
Sun 04:11:20 AM	-34.2307	146.8077	← 268°	414.0	476.0	40000.0	Level	Aus ATC (ADS-B)
Sun 04:11:34 AM	-34.2315	146.777	← 268°	414.0	476.0	40000.0	-88 Descending	Aus ATC (ADS-B)
Sun 04:11:37 AM	-34.2317	146.7731	← 269°	414.0	476.0	39975.0	Level	FlightAware ADS-B (CBR / YSCB)
Sun 04:11:45 AM	-34.2323	146.7502	← 268°	414.0	476.0	40000.0	68 Climbing	Aus ATC (ADS-B)
Sun 04:11:59 AM	-34.2331	146.7195	← 268°	413.0	475.0	40000.0	Level	Aus ATC (ADS-B)
Sun 04:12:00 AM	-34.2332	146.7158	← 268°	413.0	475.0	40000.0	Level	Aus ATC (ADS-B)
Sun 04:12:10 AM	-34.2339	146.6927	← 268°	413.0	475.0	40000.0	Level	Aus ATC (ADS-B)
Sun 04:12:15 AM	-34.2342	146.6812	← 268°	413.0	475.0	40000.0	Level	Aus ATC (ADS-B)
Sun 04:12:23 AM	-34.2347	146.662	← 268°	413.0	475.0	40000.0	Level	Aus ATC (ADS-B)
Sun 04:12:30 AM	-34.2351	146.6469	← 268°	413.0	475.0	40000.0	Level	Aus ATC (ADS-B)
Sun 04:12:35 AM	-34.2354	146.6353	← 268°	413.0	475.0	40000.0	Level	Aus ATC (ADS-B)
Sun 04:12:43 AM	-34.2359	146.6202	← 268°	413.0	475.0	40000.0	Level	FlightAware ADS-B (NRA / YNAR)
Sun 04:12:45 AM	-34.2361	146.6123	← 269°	414.0	476.0	40000.0	Level	Aus ATC (ADS-B)
Sun 04:12:48 AM	-34.2363	146.6044	← 268°	414.0	476.0	40000.0	Level	Aus ATC (ADS-B)
Sun 04:13:00 AM	-34.237	146.5777	← 268°	414.0	476.0	40000.0	Level	Aus ATC (ADS-B)
Sun 04:13:15 AM	-34.2379	146.5433	← 268°	414.0	476.0	40000.0	Level	Aus ATC (ADS-B)
Sun 04:13:25 AM	-34.2385	146.5202	← 268°	414.0	476.0	40000.0	Level	Aus ATC (ADS-B)
Sun 04:13:30 AM	-34.2388	146.5087	← 268°	414.0	476.0	40000.0	Level	Aus ATC (ADS-B)
Sun 04:13:40 AM	-34.2394	146.4858	← 268°	414.0	476.0	40000.0	-100 Descending	Aus ATC (ADS-B)
Sun 04:13:45 AM	-34.2397	146.474	← 268°	414.0	476.0	39975.0	Level	FlightAware ADS-B (YMIG)
Sun 04:14:18 AM	-34.2416	146.3972	← 268°	414.0	476.0	40000.0	Level	Aus ATC (ADS-B)
Sun 04:14:23 AM	-34.2417	146.3926	← 268°	414.0	476.0	39975.0	Level	FlightAware ADS-B (NRA / YNAR)
Sun 04:14:30 AM	-34.2423	146.3706	← 268°	414.0	476.0	40000.0	75 Climbing	Aus ATC (ADS-B)
Sun 04:14:43 AM	-34.243	146.3396	← 268°	414.0	476.0	40000.0	Level	Aus ATC (ADS-B)
Sun 04:14:55 AM	-34.2437	146.3128	← 268°	414.0	476.0	40000.0	Level	Aus ATC (ADS-B)
Sun 04:14:58 AM	-34.2439	146.3049	← 268°	414.0	476.0	40000.0	Level	Aus ATC (ADS-B)
Sun 04:15:10 AM	-34.2445	146.2783	← 268°	414.0	476.0	40000.0	Level	Aus ATC (ADS-B)
Sun 04:15:13 AM	-34.2447	146.2705	← 268°	414.0	476.0	40000.0	Level	Aus ATC (ADS-B)
Sun 04:15:23 AM	-34.2452	146.2475	← 268°	414.0	476.0	40000.0	-107 Descending	Aus ATC (ADS-B)
Sun 04:15:27 AM	-34.2455	146.2371	← 269°	414.0	476.0	39975.0	Level	FlightAware ADS-B (ABX / YMAY)
Sun 04:15:28 AM	-34.2455	146.236	← 267°	414.0	476.0	40000.0	188 Climbing	Aus ATC (ADS-B)
Sun 04:15:35 AM	-34.2458	146.2209	← 268°	413.0	475.0	40000.0	Level	Aus ATC (ADS-B)
Sun 04:15:43 AM	-34.2464	146.2014	← 268°	413.0	475.0	40000.0	Level	Aus ATC (ADS-B)
Sun 04:15:48 AM	-34.2466	146.1899	← 269°	413.0	475.0	40000.0	-125 Descending	Aus ATC (ADS-B)
Sun 04:15:55 AM	-34.2469	146.1757	← 270°	413.0	475.0	39975.0	Level	FlightAware ADS-B (CBR / YSCB)
Sun 04:15:58 AM	-34.2471	146.1668	← 268°	413.0	475.0	40000.0	300 Climbing	Aus ATC (ADS-B)
Sun 04:16:00 AM	-34.2472	146.1632	← 269°	413.0	475.0	40000.0	Level	Aus ATC (ADS-B)
Sun 04:16:15 AM	-34.2479	146.1286	← 269°	414.0	476.0	40000.0	-60 Descending	Aus ATC (ADS-B)
Sun 04:16:25 AM	-34.2485	146.1053	← 269°	416.0	479.0	39975.0	-38 Descending	FlightAware ADS-B (CBR / YSCB)
Sun 04:16:55 AM	-34.2504	146.035	← 268°	422.0	486.0	39975.0	30 Climbing	FlightAware ADS-B (YXWG)
Sun 04:17:15 AM	-34.2519	145.9886	← 268°	424.0	488.0	40000.0	50 Climbing	Aus ATC (ADS-B)
Sun 04:17:25 AM	-34.2527	145.9648	← 268°	424.0	488.0	40000.0	Level	Aus ATC (ADS-B)
Sun 04:17:30 AM	-34.2531	145.9531	← 268°	424.0	488.0	40000.0	Level	Aus ATC (ADS-B)
Sun 04:17:40 AM	-34.2539	145.9297	← 268°	423.0	487.0	40000.0	Level	Aus ATC (ADS-B)
Sun 04:17:55 AM	-34.2551	145.8943	← 268°	422.0	486.0	40000.0	-143 Descending	Aus ATC (ADS-B)
Sun 04:18:01 AM	-34.2556	145.8774	← 268°	422.0	486.0	39950.0	Level	FlightAware ADS-B (MQL / YMIA)
Sun 04:18:08 AM	-34.256	145.8628	← 268°	422.0	486.0	40000.0	333 Climbing	Aus ATC (ADS-B)
Sun 04:18:10 AM	-34.2561	145.8591	← 268°	422.0	486.0	40000.0	Level	Aus ATC (ADS-B)
Sun 04:18:20 AM	-34.2569	145.8357	← 268°	422.0	486.0	40000.0	Level	Aus ATC (ADS-B)
Sun 04:18:25 AM	-34.2572	145.8238	← 268°	422.0	486.0	40000.0	Level	Aus ATC (ADS-B)
Sun 04:18:33 AM	-34.2579	145.8041	← 268°	421.0	484.0	40000.0	Level	Aus ATC (ADS-B)
Sun 04:18:40 AM	-34.2583	145.7887	← 268°	420.0	483.0	40000.0	Level	Aus ATC (ADS-B)
Sun 04:18:44 AM	-34.2586	145.777	← 268°	420.0	483.0	40000.0	Level	Aus ATC (ADS-B)
Sun 04:18:55 AM	-34.2594	145.7538	← 268°	419.0	482.0	40000.0	Level	Aus ATC (ADS-B)
Sun 04:19:01 AM	-34.2598	145.7397	← 269°	418.0	481.0	40000.0	Level	FlightAware ADS-B (CBR / YSCB)
Sun 04:19:09 AM	-34.2604	145.7188	← 268°	418.0	481.0	40000.0	Level	Aus ATC (ADS-B)
Sun 04:19:39 AM	-34.2625	145.6469	← 268°	418.0	481.0	40000.0	Level	FlightAware ADS-B (MQL / YMIA)
Sun 04:20:00 AM	-34.2639	145.6024	← 268°	417.0	480.0	40000.0	Level	Aus ATC (ADS-B)
Sun 04:20:08 AM	-34.2645	145.5829	← 268°	417.0	480.0	40000.0	-136 Descending	Aus ATC (ADS-B)
Sun 04:20:11 AM	-34.2648	145.5734	← 268°	417.0	480.0	39975.0	Level	FlightAware ADS-B (GFF / YGTH)
Sun 04:20:14 AM	-34.265	145.5676	← 268°	417.0	480.0	40000.0	125 Climbing	Aus ATC (ADS-B)
Sun 04:20:23 AM	-34.2655	145.5482	← 268°	416.0	479.0	40000.0	Level	Aus ATC (ADS-B)
Sun 04:20:24 AM	-34.2656	145.5445	← 267°	417.0	480.0	40000.0	Level	Aus ATC (ADS-B)
Sun 04:20:39 AM	-34.2667	145.5095	← 268°	417.0	480.0	40000.0	Level	Aus ATC (ADS-B)
Sun 04:20:41 AM	-34.2668	145.5074	← 268°	417.0	480.0	40000.0	-41 Descending	FlightAware ADS-B (YXWG)
Sun 04:21:16 AM	-34.2692	145.4208	← 268°	415.0	478.0	39975.0	-23 Descending	FlightAware ADS-B (MQL / YMIA)
Sun 04:21:46 AM	-34.2709	145.3563	← 268°	411.0	473.0	39975.0	45 Climbing	FlightAware ADS-B (YXWG)
Sun 04:21:49 AM	-34.2711	145.348	← 268°	411.0	473.0	40000.0	188 Climbing	Aus ATC (ADS-B)
Sun 04:21:54 AM	-34.2714	145.3366	← 268°	410.0	472.0	40000.0	Level	Aus ATC (ADS-B)
Sun 04:22:08 AM	-34.2723	145.3058	← 268°	409.0	471.0	40000.0	Level	Aus ATC (ADS-B)
Sun 04:22:19 AM	-34.273	145.2795	← 268°	408.0	470.0	40000.0	Level	Aus ATC (ADS-B)
Sun 04:22:23 AM	-34.2732	145.2723	← 268°	409.0	471.0	40000.0	Level	FlightAware ADS-B (NRA / YNAR)
Sun 04:22:33 AM	-34.2738	145.2491	← 268°	408.0	470.0	40000.0	Level	Aus ATC (ADS-B)
Sun 04:22:34 AM	-34.2739	145.2454	← 267°	407.0	468.0	40000.0	Level	Aus ATC (ADS-B)
Sun 04:22:44 AM	-34.2745	145.2228	← 268°	407.0	468.0	40000.0	Level	Aus ATC (ADS-B)
Sun 04:22:49 AM	-34.2747	145.2116	← 268°	406.0	467.0	40000.0	Level	Aus ATC (ADS-B)
Sun 04:22:57 AM	-34.2753	145.1924	← 268°	406.0	467.0	40000.0	Level	Aus ATC (ADS-B)
Sun 04:23:04 AM	-34.2756	145.1775	← 268°	405.0	466.0	40000.0	Level	Aus ATC (ADS-B)
Sun 04:23:09 AM	-34.2759	145.1665	← 268°	405.0	466.0	40000.0	Level	Aus ATC (ADS-B)
Sun 04:23:19 AM	-34.2765	145.1438	← 268°	404.0	465.0	40000.0	65 Climbing	Aus ATC (ADS-B)
Sun 04:23:32 AM	-34.2773	145.1123	← 268°	403.0	464.0	40025.0	Level	FlightAware ADS-B (GFF / YGTH)
Sun 04:23:34 AM	-34.2774	145.1102	← 268°	403.0	464.0	40000.0	-56 Descending	Aus ATC (ADS-B)
Sun 04:23:59 AM	-34.2788	145.0541	← 268°	402.0	463.0	40000.0	Level	Aus ATC (ADS-B)
Sun 04:24:02 AM	-34.279	145.0465	← 269°	402.0	463.0	40000.0	-375 Descending	Aus ATC (ADS-B)
Sun 04:24:03 AM	-34.2788	145.0518	← 268°	402.0	463.0	39975.0	Level	FlightAware ADS-B (NRA / YNAR)
Sun 04:24:12 AM	-34.2795	145.024	← 268°	402.0	463.0	40000.0	107 Climbing	Aus ATC (ADS-B)
Sun 04:24:17 AM	-34.2797	145.0129	← 268°	402.0	463.0	40000.0	Level	Aus ATC (ADS-B)
Sun 04:24:24 AM	-34.2801	144.9982	← 268°	402.0	463.0	40000.0	Level	Aus ATC (ADS-B)
Sun 04:24:32 AM	-34.2806	144.9794	← 268°	401.0	461.0	40000.0	-150 Descending	Aus ATC (ADS-B)
Sun 04:24:34 AM	-34.2807	144.9754	← 268°	401.0	461.0	39975.0	Level	FlightAware ADS-B (MQL / YMIA)
Sun 04:24:44 AM	-34.2812	144.9535	← 268°	401.0	461.0	40000.0	100 Climbing	Aus ATC (ADS-B)
Sun 04:24:49 AM	-34.2815	144.9423	← 268°	401.0	461.0	40000.0	Level	Aus ATC (ADS-B)
Sun 04:24:59 AM	-34.282	144.92	← 268°	401.0	461.0	40000.0	-83 Descending	Aus ATC (ADS-B)
Sun 04:25:07 AM	-34.2824	144.9048	← 268°	401.0	461.0	39975.0	Level	FlightAware ADS-B (MEL / YMML)
Sun 04:25:14 AM	-34.2828	144.8865	← 269°	402.0	463.0	40000.0	68 Climbing	Aus ATC (ADS-B)
Sun 04:25:29 AM	-34.2836	144.8529	← 268°	402.0	463.0	40000.0	Level	Aus ATC (ADS-B)
Sun 04:25:39 AM	-34.2841	144.8304	← 268°	403.0	464.0	40000.0	-107 Descending	Aus ATC (ADS-B)
Sun 04:25:43 AM	-34.2843	144.8233	← 268°	403.0	464.0	39975.0	Level	FlightAware ADS-B (NRA / YNAR)
Sun 04:25:44 AM	-34.2844	144.8193	← 268°	403.0	464.0	40000.0	136 Climbing	Aus ATC (ADS-B)
Sun 04:25:54 AM	-34.2849	144.7969	← 268°	404.0	465.0	40000.0	Level	Aus ATC (ADS-B)
Sun 04:25:59 AM	-34.2852	144.7856	← 268°	404.0	465.0	40000.0	-79 Descending	Aus ATC (ADS-B)
Sun 04:26:13 AM	-34.2859	144.7544	← 268°	404.0	465.0	39975.0	Level	FlightAware ADS-B (MBW / YMMB)
Sun 04:26:44 AM	-34.2874	144.6841	← 268°	405.0	466.0	40000.0	44 Climbing	Aus ATC (ADS-B)
Sun 04:26:47 AM	-34.2876	144.6771	← 268°	405.0	466.0	40000.0	Level	FlightAware ADS-B (YXWG)
Sun 04:26:57 AM	-34.2881	144.6538	← 269°	406.0	467.0	40000.0	Level	Aus ATC (ADS-B)
Sun 04:26:59 AM	-34.2882	144.6502	← 269°	406.0	467.0	40000.0	Level	Aus ATC (ADS-B)
Sun 04:27:09 AM	-34.2887	144.6276	← 269°	406.0	467.0	40000.0	Level	Aus ATC (ADS-B)
Sun 04:27:14 AM	-34.2889	144.6164	← 269°	406.0	467.0	40000.0	Level	Aus ATC (ADS-B)
Sun 04:27:22 AM	-34.2893	144.5974	← 269°	405.0	466.0	40000.0	Level	Aus ATC (ADS-B)
Sun 04:27:29 AM	-34.2896	144.5825	← 269°	405.0	466.0	40000.0	Level	Aus ATC (ADS-B)
Sun 04:27:34 AM	-34.2898	144.5713	← 269°	404.0	465.0	40000.0	Level	Aus ATC (ADS-B)
Sun 04:27:42 AM	-34.2902	144.5524	← 268°	403.0	464.0	40000.0	Level	Aus ATC (ADS-B)
Sun 04:27:47 AM	-34.2905	144.5412	← 268°	402.0	463.0	40000.0	Level	Aus ATC (ADS-B)
Sun 04:27:59 AM	-34.291	144.5153	← 269°	400.0	460.0	40000.0	Level	Aus ATC (ADS-B)
Sun 04:28:12 AM	-34.2915	144.4856	← 269°	398.0	458.0	40000.0	Level	Aus ATC (ADS-B)
Sun 04:28:24 AM	-34.2921	144.46	← 268°	395.0	455.0	40000.0	Level	Aus ATC (ADS-B)
Sun 04:28:27 AM	-34.2922	144.4525	← 269°	395.0	455.0	40000.0	-167 Descending	Aus ATC (ADS-B)
Sun 04:28:33 AM	-34.2926	144.4358	← 269°	395.0	455.0	39975.0	Level	FlightAware ADS-B (YXWG)
Sun 04:28:39 AM	-34.2928	144.427	← 269°	395.0	455.0	40000.0	167 Climbing	Aus ATC (ADS-B)
Sun 04:28:42 AM	-34.2929	144.4194	← 269°	394.0	453.0	40000.0	Level	Aus ATC (ADS-B)
Sun 04:28:49 AM	-34.2932	144.4051	← 268°	394.0	453.0	40000.0	Level	Aus ATC (ADS-B)
Sun 04:28:57 AM	-34.2935	144.3865	← 269°	394.0	453.0	40000.0	Level	Aus ATC (ADS-B)
Sun 04:29:04 AM	-34.2938	144.372	← 268°	394.0	453.0	40000.0	Level	Aus ATC (ADS-B)
Sun 04:29:12 AM	-34.2942	144.3535	← 269°	394.0	453.0	40000.0	Level	Aus ATC (ADS-B)
Sun 04:29:14 AM	-34.2943	144.3502	← 269°	394.0	453.0	40000.0	Level	Aus ATC (ADS-B)
Sun 04:29:23 AM	-34.2947	144.3281	← 269°	394.0	453.0	40000.0	-136 Descending	Aus ATC (ADS-B)
Sun 04:29:25 AM	-34.2947	144.3261	← 269°	394.0	453.0	39975.0	Level	FlightAware ADS-B (YKTH)
Sun 04:29:28 AM	-34.2949	144.3173	← 268°	394.0	453.0	40000.0	115 Climbing	Aus ATC (ADS-B)
Sun 04:29:38 AM	-34.2953	144.2954	← 269°	394.0	453.0	40000.0	Level	Aus ATC (ADS-B)
Sun 04:29:58 AM	-34.2961	144.2509	← 269°	394.0	453.0	40000.0	Level	FlightAware ADS-B (GFF / YGTH)
Sun 04:30:18 AM	-34.2969	144.2075	← 269°	394.0	453.0	40000.0	Level	Aus ATC (ADS-B)
Sun 04:30:23 AM	-34.2971	144.1966	← 269°	394.0	453.0	40000.0	-125 Descending	Aus ATC (ADS-B)
Sun 04:30:30 AM	-34.2974	144.1804	← 269°	394.0	453.0	39975.0	Level	FlightAware ADS-B (GFF / YGTH)
Sun 04:30:38 AM	-34.2977	144.1636	← 269°	393.0	452.0	40000.0	115 Climbing	Aus ATC (ADS-B)
Sun 04:30:43 AM	-34.2979	144.1526	← 269°	393.0	452.0	40000.0	Level	Aus ATC (ADS-B)
Sun 04:30:53 AM	-34.2983	144.131	← 269°	392.0	451.0	40000.0	-136 Descending	Aus ATC (ADS-B)
Sun 04:30:54 AM	-34.2983	144.131	← 270°	392.0	451.0	39975.0	Level	FlightAware ADS-B (MEL / YMML)
Sun 04:31:08 AM	-34.2988	144.0982	← 269°	391.0	450.0	40000.0	63 Climbing	Aus ATC (ADS-B)
Sun 04:31:18 AM	-34.2992	144.0765	← 269°	390.0	449.0	40000.0	Level	Aus ATC (ADS-B)
Sun 04:31:22 AM	-34.2993	144.0691	← 269°	390.0	449.0	40000.0	-250 Descending	Aus ATC (ADS-B)
Sun 04:31:24 AM	-34.2994	144.065	← 269°	390.0	449.0	39975.0	Level	FlightAware ADS-B (MEL / YMML)
Sun 04:31:33 AM	-34.2997	144.0439	← 269°	390.0	449.0	40000.0	115 Climbing	Aus ATC (ADS-B)
Sun 04:31:37 AM	-34.2998	144.0364	← 269°	390.0	449.0	40000.0	Level	Aus ATC (ADS-B)
Sun 04:31:43 AM	-34.3	144.0222	← 269°	389.0	448.0	40000.0	Level	Aus ATC (ADS-B)
Sun 04:31:52 AM	-34.3004	144.004	← 269°	389.0	448.0	40000.0	-136 Descending	Aus ATC (ADS-B)
Sun 04:31:54 AM	-34.3004	143.9999	← 269°	389.0	448.0	39975.0	Level	FlightAware ADS-B (MEL / YMML)
Sun 04:31:58 AM	-34.3006	143.9897	← 269°	389.0	448.0	40000.0	107 Climbing	Aus ATC (ADS-B)
Sun 04:32:08 AM	-34.3009	143.9681	← 269°	389.0	448.0	40000.0	Level	Aus ATC (ADS-B)
Sun 04:32:33 AM	-34.3018	143.9151	← 269°	390.0	449.0	40000.0	Level	FlightAware ADS-B (BXG / YBDG)
Sun 04:32:48 AM	-34.3023	143.8812	← 269°	390.0	449.0	40000.0	Level	Aus ATC (ADS-B)
Sun 04:33:02 AM	-34.3028	143.8522	← 269°	389.0	448.0	40000.0	-100 Descending	Aus ATC (ADS-B)
Sun 04:33:03 AM	-34.3028	143.8506	← 269°	389.0	448.0	39975.0	Level	FlightAware ADS-B (NRA / YNAR)
Sun 04:33:13 AM	-34.3031	143.827	← 269°	389.0	448.0	40000.0	100 Climbing	Aus ATC (ADS-B)
Sun 04:33:18 AM	-34.3033	143.8161	← 269°	389.0	448.0	40000.0	Level	Aus ATC (ADS-B)
Sun 04:33:26 AM	-34.3036	143.7979	← 269°	390.0	449.0	40000.0	Level	Aus ATC (ADS-B)
Sun 04:33:33 AM	-34.3038	143.7835	← 269°	390.0	449.0	40000.0	Level	Aus ATC (ADS-B)
Sun 04:33:38 AM	-34.304	143.7727	← 269°	390.0	449.0	40000.0	Level	Aus ATC (ADS-B)
Sun 04:33:48 AM	-34.3042	143.7509	← 269°	391.0	450.0	40000.0	Level	Aus ATC (ADS-B)
Sun 04:33:53 AM	-34.3044	143.7401	← 269°	391.0	450.0	40000.0	Level	Aus ATC (ADS-B)
Sun 04:34:03 AM	-34.3047	143.7182	← 269°	392.0	451.0	40000.0	-100 Descending	Aus ATC (ADS-B)
Sun 04:34:08 AM	-34.3048	143.7088	← 269°	392.0	451.0	39975.0	Level	FlightAware ADS-B (YKTH)
Sun 04:34:18 AM	-34.3051	143.6855	← 269°	392.0	451.0	40000.0	75 Climbing	Aus ATC (ADS-B)
Sun 04:34:28 AM	-34.3055	143.6637	← 269°	392.0	451.0	40000.0	Level	Aus ATC (ADS-B)
Sun 04:34:31 AM	-34.3056	143.6563	← 269°	392.0	451.0	40000.0	-150 Descending	Aus ATC (ADS-B)
Sun 04:34:38 AM	-34.3057	143.6428	← 269°	392.0	451.0	39975.0	Level	FlightAware ADS-B (YKTH)
Sun 04:34:46 AM	-34.306	143.6236	← 269°	392.0	451.0	40000.0	100 Climbing	Aus ATC (ADS-B)
Sun 04:34:53 AM	-34.3062	143.6091	← 269°	392.0	451.0	40000.0	Level	Aus ATC (ADS-B)
Sun 04:35:01 AM	-34.3064	143.5908	← 269°	392.0	451.0	40000.0	Level	Aus ATC (ADS-B)
Sun 04:35:06 AM	-34.3066	143.5799	← 269°	392.0	451.0	40000.0	Level	Aus ATC (ADS-B)
Sun 04:35:13 AM	-34.3067	143.5654	← 269°	392.0	451.0	40000.0	Level	Aus ATC (ADS-B)
Sun 04:35:16 AM	-34.3068	143.559	← 269°	393.0	452.0	40000.0	Level	FlightAware ADS-B (YKTH)
Sun 04:35:18 AM	-34.3069	143.5545	← 269°	393.0	452.0	40000.0	Level	Aus ATC (ADS-B)
Sun 04:35:28 AM	-34.3071	143.5327	← 269°	394.0	453.0	40000.0	Level	Aus ATC (ADS-B)
Sun 04:35:31 AM	-34.3073	143.5252	← 269°	394.0	453.0	40000.0	Level	Aus ATC (ADS-B)
Sun 04:35:43 AM	-34.3076	143.4997	← 269°	395.0	455.0	40000.0	Level	Aus ATC (ADS-B)
Sun 04:35:50 AM	-34.3077	143.4823	← 269°	395.0	455.0	40000.0	Level	FlightAware ADS-B (MQL / YMIA)
Sun 04:35:58 AM	-34.3079	143.4668	← 269°	395.0	455.0	40000.0	Level	Aus ATC (ADS-B)
Sun 04:36:08 AM	-34.3082	143.4447	← 269°	395.0	455.0	40000.0	-68 Descending	Aus ATC (ADS-B)
Sun 04:36:20 AM	-34.3085	143.4158	← 269°	394.0	453.0	39975.0	Level	FlightAware ADS-B (MQL / YMIA)
Sun 04:36:48 AM	-34.3093	143.3568	← 269°	395.0	455.0	40000.0	39 Climbing	Aus ATC (ADS-B)
Sun 04:36:58 AM	-34.3094	143.335	← 269°	395.0	455.0	40000.0	Level	Aus ATC (ADS-B)
Sun 04:36:59 AM	-34.3095	143.3313	← 269°	395.0	455.0	40000.0	-48 Descending	FlightAware ADS-B (YKTH)
Sun 04:37:29 AM	-34.3102	143.2646	← 269°	396.0	456.0	39975.0	Level	FlightAware ADS-B (YKTH)
Sun 04:37:38 AM	-34.3104	143.2467	← 269°	396.0	456.0	40000.0	125 Climbing	Aus ATC (ADS-B)
Sun 04:37:41 AM	-34.3105	143.2391	← 270°	396.0	456.0	40000.0	Level	Aus ATC (ADS-B)
Sun 04:37:48 AM	-34.3106	143.2247	← 269°	396.0	456.0	40000.0	Level	Aus ATC (ADS-B)
Sun 04:37:53 AM	-34.3108	143.2136	← 269°	396.0	456.0	40000.0	Level	Aus ATC (ADS-B)
Sun 04:38:03 AM	-34.3109	143.1917	← 270°	396.0	456.0	40000.0	Level	Aus ATC (ADS-B)
Sun 04:38:08 AM	-34.3111	143.1805	← 269°	396.0	456.0	40000.0	Level	Aus ATC (ADS-B)
Sun 04:38:13 AM	-34.3112	143.1695	← 270°	396.0	456.0	40000.0	Level	Aus ATC (ADS-B)
Sun 04:38:23 AM	-34.3113	143.1474	← 270°	396.0	456.0	40000.0	Level	Aus ATC (ADS-B)
Sun 04:38:28 AM	-34.3114	143.1364	← 269°	396.0	456.0	40000.0	Level	Aus ATC (ADS-B)
Sun 04:38:36 AM	-34.3116	143.1146	← 269°	396.0	456.0	40000.0	Level	FlightAware ADS-B (MQL / YMIA)
Sun 04:38:38 AM	-34.3116	143.1145	← 271°	396.0	456.0	40000.0	Level	Aus ATC (ADS-B)
Sun 04:38:53 AM	-34.3119	143.0813	← 269°	396.0	456.0	40000.0	Level	Aus ATC (ADS-B)
Sun 04:39:03 AM	-34.3121	143.0592	← 269°	396.0	456.0	40000.0	-115 Descending	Aus ATC (ADS-B)
Sun 04:39:06 AM	-34.3122	143.0526	← 269°	396.0	456.0	39975.0	Level	FlightAware ADS-B (YXWG)
Sun 04:39:08 AM	-34.3122	143.0483	← 270°	396.0	456.0	40000.0	125 Climbing	Aus ATC (ADS-B)
Sun 04:39:18 AM	-34.3124	143.0262	← 269°	396.0	456.0	40000.0	Level	Aus ATC (ADS-B)
Sun 04:39:23 AM	-34.3125	143.0152	← 269°	397.0	457.0	40000.0	Level	Aus ATC (ADS-B)
Sun 04:39:31 AM	-34.3126	142.9966	← 270°	397.0	457.0	40000.0	Level	Aus ATC (ADS-B)
Sun 04:39:38 AM	-34.3128	142.9819	← 269°	397.0	457.0	40000.0	Level	Aus ATC (ADS-B)
Sun 04:39:39 AM	-34.3128	142.9771	← 269°	397.0	457.0	40000.0	Level	FlightAware ADS-B (MQL / YMIA)
Sun 04:39:43 AM	-34.3128	142.9709	← 270°	397.0	457.0	40000.0	Level	Aus ATC (ADS-B)
Sun 04:39:53 AM	-34.313	142.9487	← 269°	397.0	457.0	40000.0	Level	Aus ATC (ADS-B)
Sun 04:40:08 AM	-34.3133	142.9155	← 269°	398.0	458.0	40000.0	Level	Aus ATC (ADS-B)
Sun 04:40:11 AM	-34.3133	142.9085	← 269°	398.0	458.0	40000.0	Level	FlightAware ADS-B (YKTH)
Sun 04:40:18 AM	-34.3134	142.8934	← 269°	398.0	458.0	40000.0	Level	Aus ATC (ADS-B)
Sun 04:40:22 AM	-34.3135	142.8823	← 269°	398.0	458.0	40000.0	Level	Aus ATC (ADS-B)
Sun 04:40:32 AM	-34.3137	142.8601	← 269°	398.0	458.0	40000.0	Level	Aus ATC (ADS-B)
Sun 04:40:37 AM	-34.3137	142.849	← 270°	398.0	458.0	40000.0	-167 Descending	Aus ATC (ADS-B)
Sun 04:40:41 AM	-34.3138	142.8409	← 270°	398.0	458.0	39975.0	Level	FlightAware ADS-B (YKTH)
Sun 04:40:42 AM	-34.3138	142.8379	← 270°	398.0	458.0	40000.0	150 Climbing	Aus ATC (ADS-B)
Sun 04:40:51 AM	-34.3139	142.8193	← 270°	399.0	459.0	40000.0	Level	Aus ATC (ADS-B)
Sun 04:40:57 AM	-34.314	142.8046	← 269°	399.0	459.0	40000.0	Level	Aus ATC (ADS-B)
Sun 04:41:06 AM	-34.3141	142.786	← 269°	399.0	459.0	40000.0	Level	Aus ATC (ADS-B)
Sun 04:41:11 AM	-34.3142	142.7749	← 269°	400.0	460.0	40000.0	-167 Descending	Aus ATC (ADS-B)
Sun 04:41:15 AM	-34.3143	142.7641	← 270°	400.0	460.0	39975.0	Level	FlightAware ADS-B (MQL / YMIA)
Sun 04:41:22 AM	-34.3144	142.749	← 270°	401.0	461.0	40000.0	71 Climbing	Aus ATC (ADS-B)
Sun 04:41:36 AM	-34.3145	142.7191	← 270°	402.0	463.0	40000.0	Level	Aus ATC (ADS-B)
Sun 04:41:47 AM	-34.3147	142.6931	← 269°	402.0	463.0	40000.0	Level	Aus ATC (ADS-B)
Sun 04:41:48 AM	-34.3147	142.6911	← 270°	402.0	463.0	40000.0	Level	FlightAware ADS-B (YXWG)
Sun 04:41:51 AM	-34.3147	142.6855	← 269°	402.0	463.0	40000.0	Level	Aus ATC (ADS-B)
Sun 04:42:01 AM	-34.3149	142.663	← 269°	402.0	463.0	40000.0	Level	Aus ATC (ADS-B)
Sun 04:42:06 AM	-34.3149	142.6518	← 270°	402.0	463.0	40000.0	Level	Aus ATC (ADS-B)
Sun 04:42:19 AM	-34.3151	142.6219	← 270°	402.0	463.0	40000.0	Level	FlightAware ADS-B (YKTH)
Sun 04:42:37 AM	-34.3153	142.5814	← 270°	401.0	461.0	40000.0	Level	Aus ATC (ADS-B)
Sun 04:42:52 AM	-34.3155	142.5479	← 270°	400.0	460.0	40000.0	-75 Descending	Aus ATC (ADS-B)
Sun 04:42:57 AM	-34.3155	142.5343	← 270°	399.0	459.0	39975.0	Level	FlightAware ADS-B (MQL / YMIA)
Sun 04:43:02 AM	-34.3155	142.5255	← 270°	399.0	459.0	40000.0	167 Climbing	Aus ATC (ADS-B)
Sun 04:43:06 AM	-34.3156	142.518	← 269°	399.0	459.0	40000.0	Level	Aus ATC (ADS-B)
Sun 04:43:17 AM	-34.3157	142.4922	← 270°	399.0	459.0	40000.0	Level	Aus ATC (ADS-B)
Sun 04:43:20 AM	-34.3158	142.4846	← 270°	399.0	459.0	40000.0	Level	Aus ATC (ADS-B)
Sun 04:43:30 AM	-34.3158	142.4624	← 270°	400.0	460.0	40000.0	Level	Aus ATC (ADS-B)
Sun 04:43:35 AM	-34.3158	142.4512	← 270°	400.0	460.0	40000.0	Level	Aus ATC (ADS-B)
Sun 04:43:42 AM	-34.3158	142.4365	← 270°	400.0	460.0	40000.0	Level	Aus ATC (ADS-B)
Sun 04:43:47 AM	-34.3159	142.4253	← 269°	401.0	461.0	40000.0	Level	Aus ATC (ADS-B)
Sun 04:43:55 AM	-34.316	142.4066	← 270°	401.0	461.0	40000.0	Level	Aus ATC (ADS-B)
Sun 04:44:02 AM	-34.316	142.3919	← 270°	401.0	461.0	40000.0	Level	Aus ATC (ADS-B)
Sun 04:44:07 AM	-34.316	142.3807	← 270°	402.0	463.0	40000.0	-188 Descending	Aus ATC (ADS-B)
Sun 04:44:10 AM	-34.3161	142.3713	← 270°	402.0	463.0	39975.0	Level	FlightAware ADS-B (MQL / YMIA)
Sun 04:44:20 AM	-34.3161	142.3507	← 270°	402.0	463.0	40000.0	68 Climbing	Aus ATC (ADS-B)
Sun 04:44:32 AM	-34.3162	142.3249	← 270°	401.0	461.0	40000.0	Level	Aus ATC (ADS-B)
Sun 04:44:43 AM	-34.3163	142.2994	← 270°	401.0	461.0	40000.0	Level	FlightAware ADS-B (MQL / YMIA)
Sun 04:44:45 AM	-34.3163	142.2949	← 270°	401.0	461.0	40000.0	Level	Aus ATC (ADS-B)
Sun 04:44:47 AM	-34.3163	142.2912	← 270°	401.0	461.0	40000.0	Level	Aus ATC (ADS-B)
Sun 04:44:57 AM	-34.3164	142.269	← 270°	401.0	461.0	40000.0	Level	Aus ATC (ADS-B)
Sun 04:45:02 AM	-34.3164	142.2576	← 270°	402.0	463.0	40000.0	Level	Aus ATC (ADS-B)
Sun 04:45:10 AM	-34.3164	142.2388	← 270°	402.0	463.0	40000.0	-107 Descending	Aus ATC (ADS-B)
Sun 04:45:16 AM	-34.3165	142.2264	← 270°	402.0	463.0	39975.0	Level	FlightAware ADS-B (YSFG)
Sun 04:45:17 AM	-34.3164	142.2242	← 268°	402.0	463.0	40000.0	250 Climbing	Aus ATC (ADS-B)
Sun 04:45:22 AM	-34.3164	142.2129	← 270°	402.0	463.0	40000.0	Level	Aus ATC (ADS-B)
Sun 04:45:32 AM	-34.3165	142.1905	← 270°	402.0	463.0	40000.0	Level	Aus ATC (ADS-B)
Sun 04:45:35 AM	-34.3165	142.183	← 270°	402.0	463.0	40000.0	Level	Aus ATC (ADS-B)
Sun 04:45:47 AM	-34.3165	142.1571	← 270°	401.0	461.0	40000.0	-94 Descending	Aus ATC (ADS-B)
Sun 04:45:51 AM	-34.3165	142.1466	← 270°	401.0	461.0	39975.0	Level	FlightAware ADS-B (MQL / YMIA)
Sun 04:46:00 AM	-34.3165	142.1271	← 270°	401.0	461.0	40000.0	136 Climbing	Aus ATC (ADS-B)
Sun 04:46:02 AM	-34.3166	142.1235	← 269°	401.0	461.0	40000.0	Level	Aus ATC (ADS-B)
Sun 04:46:12 AM	-34.3166	142.1011	← 270°	401.0	461.0	40000.0	Level	Aus ATC (ADS-B)
Sun 04:46:17 AM	-34.3166	142.0901	← 270°	401.0	461.0	40000.0	Level	Aus ATC (ADS-B)
Sun 04:46:25 AM	-34.3166	142.0713	← 270°	401.0	461.0	40000.0	Level	Aus ATC (ADS-B)
Sun 04:46:32 AM	-34.3166	142.0565	← 270°	400.0	460.0	40000.0	Level	Aus ATC (ADS-B)
Sun 04:46:34 AM	-34.3166	142.0512	← 270°	400.0	460.0	40000.0	Level	FlightAware ADS-B (MQL / YMIA)
Sun 04:46:37 AM	-34.3166	142.0453	← 270°	400.0	460.0	40000.0	Level	Aus ATC (ADS-B)
Sun 04:46:47 AM	-34.3166	142.0232	← 270°	400.0	460.0	40000.0	Level	Aus ATC (ADS-B)
Sun 04:46:50 AM	-34.3166	142.0157	← 270°	400.0	460.0	40000.0	Level	Aus ATC (ADS-B)
Sun 04:47:00 AM	-34.3166	141.9933	← 270°	400.0	460.0	40000.0	Level	Aus ATC (ADS-B)
Sun 04:47:02 AM	-34.3166	141.9898	← 269°	400.0	460.0	40000.0	Level	Aus ATC (ADS-B)
Sun 04:47:04 AM	-34.3166	141.986	← 270°	400.0	460.0	40000.0	-47 Descending	FlightAware ADS-B (YKTH)
Sun 04:47:34 AM	-34.3166	141.9174	← 270°	400.0	460.0	39975.0	Level	FlightAware ADS-B (YKTH)
Sun 04:47:45 AM	-34.3166	141.893	← 270°	400.0	460.0	40000.0	83 Climbing	Aus ATC (ADS-B)
Sun 04:47:52 AM	-34.3165	141.8783	← 270°	400.0	460.0	40000.0	Level	Aus ATC (ADS-B)
Sun 04:47:57 AM	-34.3165	141.8672	← 270°	400.0	460.0	40000.0	Level	Aus ATC (ADS-B)
Sun 04:48:07 AM	-34.3165	141.8448	← 270°	400.0	460.0	40000.0	Level	Aus ATC (ADS-B)
Sun 04:48:12 AM	-34.3165	141.8336	← 270°	400.0	460.0	40000.0	Level	Aus ATC (ADS-B)
Sun 04:48:20 AM	-34.3165	141.815	← 270°	399.0	459.0	40000.0	Level	Aus ATC (ADS-B)
Sun 04:48:27 AM	-34.3165	141.8005	← 270°	398.0	458.0	40000.0	Level	Aus ATC (ADS-B)
Sun 04:48:32 AM	-34.3165	141.7893	← 270°	397.0	457.0	40000.0	-94 Descending	Aus ATC (ADS-B)
Sun 04:48:43 AM	-34.3164	141.7653	← 270°	397.0	457.0	39975.0	Level	FlightAware ADS-B (PAL / YPPF)
Sun 04:49:17 AM	-34.3163	141.6886	← 270°	396.0	456.0	40000.0	38 Climbing	FlightAware ADS-B (YKTH)
Sun 04:49:22 AM	-34.3162	141.6789	← 271°	396.0	456.0	40000.0	Level	Aus ATC (ADS-B)
Sun 04:49:27 AM	-34.3162	141.6678	← 270°	396.0	456.0	40000.0	Level	Aus ATC (ADS-B)
Sun 04:49:35 AM	-34.3161	141.6493	← 270°	396.0	456.0	40000.0	Level	Aus ATC (ADS-B)
Sun 04:49:42 AM	-34.3161	141.6347	← 270°	396.0	456.0	40000.0	Level	Aus ATC (ADS-B)
Sun 04:49:47 AM	-34.316	141.6236	← 271°	397.0	457.0	40000.0	Level	Aus ATC (ADS-B)
Sun 04:49:57 AM	-34.316	141.6015	← 270°	397.0	457.0	40000.0	Level	Aus ATC (ADS-B)
Sun 04:50:00 AM	-34.3159	141.5942	← 271°	397.0	457.0	40000.0	Level	Aus ATC (ADS-B)
Sun 04:50:12 AM	-34.3158	141.5683	← 270°	397.0	457.0	40000.0	Level	Aus ATC (ADS-B)
Sun 04:50:18 AM	-34.3158	141.5532	← 270°	397.0	457.0	40000.0	Level	FlightAware ADS-B (MQL / YMIA)
Sun 04:50:50 AM	-34.3155	141.4834	← 270°	398.0	458.0	40000.0	Level	Aus ATC (ADS-B)
Sun 04:50:55 AM	-34.3155	141.4722	← 270°	399.0	459.0	40000.0	Level	Aus ATC (ADS-B)
Sun 04:51:01 AM	-34.3154	141.4576	← 270°	399.0	459.0	40000.0	Level	Aus ATC (ADS-B)
Sun 04:51:10 AM	-34.3153	141.4388	← 270°	400.0	460.0	40000.0	Level	Aus ATC (ADS-B)
Sun 04:51:16 AM	-34.3152	141.4241	← 270°	400.0	460.0	40000.0	-115 Descending	Aus ATC (ADS-B)
Sun 04:51:23 AM	-34.3152	141.4086	← 270°	400.0	460.0	39975.0	Level	FlightAware ADS-B (MQL / YMIA)
Sun 04:51:25 AM	-34.3152	141.4054	← 270°	400.0	460.0	40000.0	500 Climbing	Aus ATC (ADS-B)
Sun 04:51:26 AM	-34.3152	141.402	← 271°	400.0	460.0	40000.0	Level	Aus ATC (ADS-B)
Sun 04:51:40 AM	-34.315	141.372	← 270°	400.0	460.0	40000.0	Level	Aus ATC (ADS-B)
Sun 04:51:41 AM	-34.315	141.3684	← 271°	400.0	460.0	40000.0	Level	Aus ATC (ADS-B)
Sun 04:52:09 AM	-34.3146	141.305	← 270°	400.0	460.0	40000.0	Level	FlightAware ADS-B (MQL / YMIA)
Sun 04:52:36 AM	-34.3142	141.2459	← 270°	399.0	459.0	40000.0	Level	Aus ATC (ADS-B)
Sun 04:52:39 AM	-34.3142	141.2409	← 271°	399.0	459.0	40000.0	Level	FlightAware ADS-B (YXAD)
Sun 04:53:11 AM	-34.3137	141.1683	← 271°	399.0	459.0	40000.0	Level	FlightAware ADS-B (BHQ / YBHI)
Sun 04:53:21 AM	-34.3136	141.146	← 271°	399.0	459.0	40000.0	Level	Aus ATC (ADS-B)
Sun 04:53:35 AM	-34.3134	141.1163	← 270°	398.0	458.0	40000.0	Level	Aus ATC (ADS-B)
Sun 04:53:36 AM	-34.3134	141.1128	← 270°	398.0	458.0	40000.0	-188 Descending	Aus ATC (ADS-B)
Sun 04:53:43 AM	-34.3133	141.1041	← 270°	399.0	459.0	39975.0	Level	FlightAware ADS-B (PRM / LPPM)
Sun 04:53:46 AM	-34.3132	141.0906	← 270°	399.0	459.0	40000.0	188 Climbing	Aus ATC (ADS-B)
Sun 04:53:51 AM	-34.3131	141.0794	← 271°	399.0	459.0	40000.0	Level	Aus ATC (ADS-B)
Sun 04:53:59 AM	-34.313	141.0607	← 270°	399.0	459.0	40000.0	Level	Aus ATC (ADS-B)
Sun 04:54:06 AM	-34.3128	141.0462	← 271°	399.0	459.0	40000.0	Level	Aus ATC (ADS-B)
Sun 04:54:11 AM	-34.3127	141.035	← 270°	399.0	459.0	40000.0	Level	Aus ATC (ADS-B)
Sun 04:54:13 AM	-34.3127	141.0324	← 271°	399.0	459.0	40000.0	Level	FlightAware ADS-B (YADG)
Sun 04:54:21 AM	-34.3126	141.0128	← 271°	399.0	459.0	40000.0	Level	Aus ATC (ADS-B)
Sun 04:54:24 AM	-34.3125	141.0051	← 271°	399.0	459.0	40000.0	Level	Aus ATC (ADS-B)
Sun 04:54:36 AM	-34.3123	140.9793	← 271°	399.0	459.0	40000.0	Level	Aus ATC (ADS-B)
Sun 04:54:43 AM	-34.3121	140.9616	← 270°	399.0	459.0	40000.0	Level	FlightAware ADS-B (MQL / YMIA)
Sun 04:55:19 AM	-34.3115	140.8829	← 271°	399.0	459.0	40000.0	-41 Descending	Aus ATC (ADS-B)
Sun 04:55:20 AM	-34.3115	140.8822	← 270°	399.0	459.0	39975.0	Level	FlightAware ADS-B (BHQ / YBHI)
Sun 04:55:26 AM	-34.3114	140.8683	← 271°	400.0	460.0	40000.0	107 Climbing	Aus ATC (ADS-B)
Sun 04:55:34 AM	-34.3112	140.8496	← 271°	400.0	460.0	40000.0	-100 Descending	Aus ATC (ADS-B)
Sun 04:55:41 AM	-34.3111	140.8345	← 272°	400.0	460.0	39975.0	Level	FlightAware ADS-B (YPED)
Sun 04:55:49 AM	-34.3109	140.8161	← 271°	400.0	460.0	40000.0	150 Climbing	Aus ATC (ADS-B)
Sun 04:55:51 AM	-34.3108	140.8127	← 271°	400.0	460.0	40000.0	Level	Aus ATC (ADS-B)
Sun 04:56:01 AM	-34.3106	140.7904	← 271°	400.0	460.0	40000.0	Level	Aus ATC (ADS-B)
Sun 04:56:06 AM	-34.3105	140.7793	← 271°	400.0	460.0	40000.0	-150 Descending	Aus ATC (ADS-B)
Sun 04:56:11 AM	-34.3103	140.7686	← 271°	400.0	460.0	39975.0	Level	FlightAware ADS-B (YKTH)
Sun 04:56:16 AM	-34.3101	140.7569	← 271°	399.0	459.0	40000.0	75 Climbing	Aus ATC (ADS-B)
Sun 04:56:31 AM	-34.3099	140.7237	← 270°	399.0	459.0	40000.0	Level	Aus ATC (ADS-B)
Sun 04:56:41 AM	-34.3097	140.7013	← 271°	399.0	459.0	40000.0	Level	Aus ATC (ADS-B)
Sun 04:56:46 AM	-34.3096	140.6903	← 270°	400.0	460.0	40000.0	Level	Aus ATC (ADS-B)
Sun 04:56:56 AM	-34.3094	140.668	← 271°	400.0	460.0	40000.0	Level	Aus ATC (ADS-B)
Sun 04:57:01 AM	-34.3092	140.6569	← 271°	400.0	460.0	40000.0	Level	Aus ATC (ADS-B)
Sun 04:57:06 AM	-34.309	140.6455	← 271°	401.0	461.0	40000.0	Level	Aus ATC (ADS-B)
Sun 04:57:16 AM	-34.3087	140.6233	← 271°	402.0	463.0	40000.0	Level	Aus ATC (ADS-B)
Sun 04:57:21 AM	-34.3087	140.612	← 270°	403.0	464.0	40000.0	Level	Aus ATC (ADS-B)
Sun 04:57:23 AM	-34.3086	140.6087	← 271°	403.0	464.0	40000.0	Level	FlightAware ADS-B (PAL / YPPF)
Sun 04:57:31 AM	-34.3084	140.5895	← 271°	403.0	464.0	40000.0	Level	Aus ATC (ADS-B)
Sun 04:57:54 AM	-34.3077	140.5344	← 271°	402.0	463.0	40000.0	Level	FlightAware ADS-B (YGAW)
Sun 04:58:14 AM	-34.3073	140.4925	← 271°	401.0	461.0	40000.0	Level	Aus ATC (ADS-B)
Sun 04:58:21 AM	-34.3071	140.4777	← 271°	400.0	460.0	40000.0	-150 Descending	Aus ATC (ADS-B)
Sun 04:58:24 AM	-34.3069	140.4688	← 271°	400.0	460.0	39975.0	Level	FlightAware ADS-B (PAL / YPPF)
Sun 04:58:29 AM	-34.3068	140.459	← 271°	400.0	460.0	40000.0	125 Climbing	Aus ATC (ADS-B)
Sun 04:58:36 AM	-34.3066	140.4444	← 271°	399.0	459.0	40000.0	Level	Aus ATC (ADS-B)
Sun 04:58:44 AM	-34.3065	140.4256	← 271°	399.0	459.0	40000.0	Level	Aus ATC (ADS-B)
Sun 04:58:46 AM	-34.3064	140.422	← 272°	399.0	459.0	40000.0	Level	Aus ATC (ADS-B)
Sun 04:58:56 AM	-34.3061	140.3998	← 271°	399.0	459.0	40000.0	Level	Aus ATC (ADS-B)
Sun 04:59:01 AM	-34.3058	140.3887	← 272°	399.0	459.0	40000.0	Level	Aus ATC (ADS-B)
Sun 04:59:02 AM	-34.3059	140.3873	← 271°	399.0	459.0	40000.0	Level	FlightAware ADS-B (ADL / YPAD)
Sun 04:59:11 AM	-34.3056	140.3665	← 271°	398.0	458.0	40000.0	Level	Aus ATC (ADS-B)
Sun 04:59:26 AM	-34.3052	140.3334	← 271°	396.0	456.0	40000.0	-79 Descending	Aus ATC (ADS-B)
Sun 04:59:30 AM	-34.305	140.3231	← 272°	395.0	455.0	39975.0	Level	FlightAware ADS-B (YPED)
Sun 04:59:36 AM	-34.3049	140.3114	← 271°	394.0	453.0	40000.0	136 Climbing	Aus ATC (ADS-B)
Sun 04:59:41 AM	-34.3047	140.3005	← 271°	394.0	453.0	40000.0	Level	Aus ATC (ADS-B)
Sun 04:59:58 AM	-34.3042	140.2601	← 272°	393.0	452.0	40000.0	Level	FlightAware ADS-B (YPED)
Sun 05:00:26 AM	-34.3033	140.2019	← 271°	395.0	455.0	40000.0	Level	Aus ATC (ADS-B)
Sun 05:00:29 AM	-34.3032	140.1944	← 271°	395.0	455.0	40000.0	Level	FlightAware ADS-B (ADL / YPAD)
Sun 05:00:41 AM	-34.3027	140.1689	← 271°	394.0	453.0	40000.0	Level	Aus ATC (ADS-B)
Sun 05:00:51 AM	-34.3024	140.1469	← 271°	395.0	455.0	40000.0	Level	Aus ATC (ADS-B)
Sun 05:00:56 AM	-34.3023	140.1359	← 271°	395.0	455.0	40000.0	-150 Descending	Aus ATC (ADS-B)
Sun 05:01:01 AM	-34.302	140.1228	← 272°	395.0	455.0	39975.0	Level	FlightAware ADS-B (ADL / YPAD)
Sun 05:01:05 AM	-34.3018	140.114	← 271°	396.0	456.0	40000.0	167 Climbing	Aus ATC (ADS-B)
Sun 05:01:10 AM	-34.3017	140.1028	← 271°	396.0	456.0	40000.0	Level	Aus ATC (ADS-B)
Sun 05:01:15 AM	-34.3015	140.0917	← 271°	396.0	456.0	40000.0	Level	Aus ATC (ADS-B)
Sun 05:01:24 AM	-34.3012	140.0732	← 271°	397.0	457.0	40000.0	Level	Aus ATC (ADS-B)
Sun 05:01:30 AM	-34.301	140.0586	← 271°	398.0	458.0	40000.0	Level	Aus ATC (ADS-B)
Sun 05:01:31 AM	-34.301	140.0567	← 272°	398.0	458.0	40000.0	Level	FlightAware ADS-B (ADL / YPAD)
Sun 05:01:39 AM	-34.3008	140.04	← 271°	398.0	458.0	40000.0	Level	Aus ATC (ADS-B)
Sun 05:01:44 AM	-34.3007	140.0289	← 271°	398.0	458.0	40000.0	Level	Aus ATC (ADS-B)
Sun 05:01:56 AM	-34.3003	140.0031	← 271°	397.0	457.0	40000.0	-75 Descending	Aus ATC (ADS-B)
Sun 05:02:04 AM	-34.2999	139.9819	← 271°	397.0	457.0	39975.0	Level	FlightAware ADS-B (MQL / YMIA)
Sun 05:02:09 AM	-34.2998	139.9735	← 271°	397.0	457.0	40000.0	94 Climbing	Aus ATC (ADS-B)
Sun 05:02:20 AM	-34.2994	139.948	← 271°	397.0	457.0	40000.0	Level	Aus ATC (ADS-B)
Sun 05:02:24 AM	-34.2992	139.9404	← 272°	397.0	457.0	40000.0	Level	Aus ATC (ADS-B)
Sun 05:02:34 AM	-34.2988	139.9184	← 271°	397.0	457.0	40000.0	Level	Aus ATC (ADS-B)
Sun 05:02:48 AM	-34.2982	139.8871	← 272°	398.0	458.0	40000.0	Level	FlightAware ADS-B (YKTH)
Sun 05:03:05 AM	-34.2975	139.8481	← 271°	400.0	460.0	40000.0	Level	Aus ATC (ADS-B)
Sun 05:03:10 AM	-34.2973	139.837	← 271°	400.0	460.0	40000.0	115 Climbing	Aus ATC (ADS-B)
Sun 05:03:18 AM	-34.297	139.8209	← 272°	399.0	459.0	40025.0	Level	FlightAware ADS-B (ADL / YPAD)
Sun 05:03:20 AM	-34.2969	139.8148	← 271°	399.0	459.0	40000.0	-88 Descending	Aus ATC (ADS-B)
Sun 05:03:35 AM	-34.2963	139.7815	← 271°	399.0	459.0	40000.0	Level	Aus ATC (ADS-B)
Sun 05:03:49 AM	-34.2958	139.7517	← 271°	398.0	458.0	40000.0	Level	Aus ATC (ADS-B)
Sun 05:03:50 AM	-34.2958	139.7482	← 271°	398.0	458.0	40000.0	Level	Aus ATC (ADS-B)
Sun 05:04:00 AM	-34.2953	139.7261	← 271°	397.0	457.0	40000.0	Level	Aus ATC (ADS-B)
Sun 05:04:05 AM	-34.2951	139.7152	← 271°	397.0	457.0	40000.0	Level	Aus ATC (ADS-B)
Sun 05:04:13 AM	-34.2948	139.6964	← 271°	397.0	457.0	40000.0	Level	Aus ATC (ADS-B)
Sun 05:04:20 AM	-34.2945	139.6818	← 272°	397.0	457.0	40000.0	Level	Aus ATC (ADS-B)
Sun 05:04:25 AM	-34.2943	139.6709	← 271°	397.0	457.0	40000.0	Level	Aus ATC (ADS-B)
Sun 05:04:38 AM	-34.2937	139.6412	← 271°	398.0	458.0	40000.0	71 Climbing	Aus ATC (ADS-B)
Sun 05:04:46 AM	-34.2934	139.6268	← 272°	398.0	458.0	40025.0	Level	FlightAware ADS-B (ADL / YPAD)
Sun 05:04:48 AM	-34.2932	139.6189	← 271°	398.0	458.0	40000.0	-375 Descending	Aus ATC (ADS-B)
Sun 05:04:50 AM	-34.2932	139.6154	← 270°	399.0	459.0	40000.0	Level	Aus ATC (ADS-B)
Sun 05:05:03 AM	-34.2926	139.5857	← 271°	399.0	459.0	40000.0	Level	Aus ATC (ADS-B)
Sun 05:05:15 AM	-34.2921	139.56	← 271°	399.0	459.0	40000.0	Level	Aus ATC (ADS-B)
Sun 05:05:16 AM	-34.2921	139.559	← 271°	399.0	459.0	40000.0	Level	FlightAware ADS-B (ADL / YPAD)
Sun 05:05:18 AM	-34.292	139.5523	← 271°	399.0	459.0	40000.0	Level	Aus ATC (ADS-B)
Sun 05:05:28 AM	-34.2915	139.5301	← 271°	399.0	459.0	40000.0	Level	Aus ATC (ADS-B)
Sun 05:05:32 AM	-34.2914	139.5242	← 272°	399.0	459.0	40000.0	Level	FlightAware ADS-B (PAL / YPPF)
Sun 05:05:33 AM	-34.2913	139.519	← 272°	399.0	459.0	40000.0	Level	Aus ATC (ADS-B)
Sun 05:05:40 AM	-34.2909	139.5044	← 272°	400.0	460.0	40000.0	Level	Aus ATC (ADS-B)
Sun 05:05:45 AM	-34.2907	139.4932	← 271°	400.0	460.0	40000.0	Level	Aus ATC (ADS-B)
Sun 05:05:53 AM	-34.2903	139.4744	← 271°	401.0	461.0	40000.0	Level	Aus ATC (ADS-B)
Sun 05:05:56 AM	-34.2903	139.4709	← 271°	401.0	461.0	40000.0	-75 Descending	FlightAware ADS-B (ADL / YPAD)
Sun 05:06:13 AM	-34.2894	139.4306	← 273°	402.0	463.0	39975.0	Level	FlightAware ADS-B (ADL / YPAD)
Sun 05:06:30 AM	-34.2887	139.3926	← 271°	402.0	463.0	40000.0	50 Climbing	Aus ATC (ADS-B)
Sun 05:06:43 AM	-34.288	139.3626	← 272°	400.0	460.0	40000.0	Level	Aus ATC (ADS-B)
Sun 05:06:45 AM	-34.288	139.3591	← 270°	400.0	460.0	40000.0	Level	Aus ATC (ADS-B)
Sun 05:06:55 AM	-34.2875	139.3368	← 272°	399.0	459.0	40000.0	-125 Descending	Aus ATC (ADS-B)
Sun 05:06:57 AM	-34.2874	139.3324	← 272°	399.0	459.0	39975.0	Level	FlightAware ADS-B (PAL / YPPF)
Sun 05:07:00 AM	-34.2872	139.3257	← 272°	399.0	459.0	40000.0	136 Climbing	Aus ATC (ADS-B)
Sun 05:07:08 AM	-34.2868	139.3071	← 271°	398.0	458.0	40000.0	Level	Aus ATC (ADS-B)
Sun 05:07:15 AM	-34.2865	139.2925	← 272°	398.0	458.0	40000.0	Level	Aus ATC (ADS-B)
Sun 05:07:20 AM	-34.2862	139.2815	← 272°	398.0	458.0	40000.0	-125 Descending	Aus ATC (ADS-B)
Sun 05:07:27 AM	-34.2859	139.2656	← 271°	398.0	458.0	39975.0	Level	FlightAware ADS-B (YKTH)
Sun 05:07:28 AM	-34.2858	139.2628	← 271°	398.0	458.0	40000.0	250 Climbing	Aus ATC (ADS-B)
Sun 05:07:33 AM	-34.2856	139.2517	← 271°	397.0	457.0	40000.0	-100 Descending	Aus ATC (ADS-B)
Sun 05:07:43 AM	-34.2849	139.2287	← 272°	397.0	457.0	39975.0	-56 Descending	FlightAware ADS-B (ADL / YPAD)
Sun 05:08:00 AM	-34.2842	139.194	← 271°	395.0	455.0	39975.0	56 Climbing	FlightAware ADS-B (ADL / YPAD)
Sun 05:08:10 AM	-34.2837	139.1712	← 271°	394.0	453.0	40000.0	Level	Aus ATC (ADS-B)
Sun 05:08:17 AM	-34.2834	139.1551	← 272°	393.0	452.0	39975.0	Level	FlightAware ADS-B (PAL / YPPF)
