# Supplementary material for: TrackMatcher – a tool for finding intercepts in tracks of geographical positions
Source: Copernicus journal article supplement (doi:10.5194/gmd-15-7557-2022), 2022-10-18
Supplement: Supplementary file 1 [file gmd-15-7557-2022-supplement.zip › ESM/example/data/flights/ANZ176_27-JAN-2019_YPPH-NZAA.dat]

Time (CET)	Latitude	Longitude	Course	kts	mph	feet	Rate	Reporting Facility
Sun 12:11:37 PM	-31.9762	115.9546	↓ 195°	179.0	206.0	1075.0	Level	FlightAware ADS-B (JAD / YPJT)
Sun 12:11:53 PM	-31.9875	115.9511	↓ 194°	185.0	213.0	1525.0	1,406 Climbing	FlightAware ADS-B (PER / YPPH)
Sun 12:12:09 PM	-32.0025	115.948	↓ 182°	205.0	236.0	1825.0	797 Climbing	FlightAware ADS-B (YPEA)
Sun 12:12:25 PM	-32.0176	115.9519	↓ 156°	228.0	262.0	1950.0	662 Climbing	FlightAware ADS-B (JAD / YPJT)
Sun 12:12:43 PM	-32.0324	115.9664	↘ 126°	251.0	289.0	2200.0	1,500 Climbing	FlightAware ADS-B (BUY / YBUN)
Sun 12:12:59 PM	-32.0395	115.9881	↘ 111°	256.0	295.0	2800.0	2,286 Climbing	Aus ATC (ADS-B)
Sun 12:13:04 PM	-32.0411	115.9949	→ 105°	257.0	296.0	3000.0	2,750 Climbing	Aus ATC (ADS-B)
Sun 12:13:11 PM	-32.0433	116.0043	→ 105°	257.0	296.0	3350.0	3,000 Climbing	FlightAware ADS-B (PER / YPPH)
Sun 12:13:14 PM	-32.0442	116.0084	→ 104°	257.0	296.0	3500.0	2,833 Climbing	Aus ATC (ADS-B)
Sun 12:13:29 PM	-32.049	116.0287	→ 105°	259.0	298.0	4200.0	2,640 Climbing	Aus ATC (ADS-B)
Sun 12:13:39 PM	-32.0521	116.0423	→ 106°	260.0	299.0	4600.0	2,250 Climbing	Aus ATC (ADS-B)
Sun 12:13:41 PM	-32.0528	116.0452	→ 105°	260.0	299.0	4650.0	2,400 Climbing	FlightAware ADS-B
Sun 12:13:54 PM	-32.0569	116.0628	→ 105°	262.0	302.0	5200.0	3,000 Climbing	Aus ATC (ADS-B)
Sun 12:14:02 PM	-32.0607	116.0757	→ 110°	263.0	303.0	5700.0	2,625 Climbing	FlightAware ADS-B (YSEN)
Sun 12:14:30 PM	-32.0743	116.1104	↘ 116°	268.0	308.0	6775.0	2,298 Climbing	FlightAware ADS-B (BUY / YBUN)
Sun 12:14:49 PM	-32.0845	116.1358	↘ 115°	272.0	313.0	7500.0	2,328 Climbing	Aus ATC (ADS-B)
Sun 12:14:59 PM	-32.0899	116.1493	↘ 116°	275.0	316.0	7900.0	2,455 Climbing	Aus ATC (ADS-B)
Sun 12:15:00 PM	-32.0903	116.1501	↘ 115°	276.0	318.0	7950.0	2,400 Climbing	FlightAware ADS-B (PER / YPPH)
Sun 12:15:04 PM	-32.0927	116.156	↘ 115°	276.0	318.0	8100.0	2,357 Climbing	Aus ATC (ADS-B)
Sun 12:15:14 PM	-32.0982	116.1696	↘ 115°	278.0	320.0	8500.0	2,400 Climbing	Aus ATC (ADS-B)
Sun 12:15:24 PM	-32.1037	116.1834	↘ 116°	280.0	322.0	8900.0	2,400 Climbing	Aus ATC (ADS-B)
Sun 12:15:29 PM	-32.1066	116.1902	↘ 115°	281.0	323.0	9100.0	2,750 Climbing	Aus ATC (ADS-B)
Sun 12:15:30 PM	-32.1073	116.1921	↘ 116°	281.0	323.0	9175.0	2,400 Climbing	FlightAware ADS-B (YGIN)
Sun 12:15:39 PM	-32.1122	116.2041	↘ 115°	285.0	328.0	9500.0	1,974 Climbing	Aus ATC (ADS-B)
Sun 12:15:49 PM	-32.1179	116.2183	↘ 115°	289.0	333.0	9800.0	1,792 Climbing	Aus ATC (ADS-B)
Sun 12:16:15 PM	-32.1322	116.2532	↘ 116°	305.0	351.0	10575.0	1,320 Climbing	FlightAware ADS-B (JAD / YPJT)
Sun 12:16:39 PM	-32.1485	116.2935	↘ 115°	331.0	381.0	10900.0	677 Climbing	Aus ATC (ADS-B)
Sun 12:16:46 PM	-32.1532	116.305	↘ 115°	339.0	390.0	10925.0	600 Climbing	FlightAware ADS-B (JAD / YPJT)
Sun 12:16:49 PM	-32.1552	116.3102	↘ 115°	342.0	394.0	11000.0	900 Climbing	Aus ATC (ADS-B)
Sun 12:17:16 PM	-32.1745	116.358	↘ 115°	365.0	420.0	11375.0	1,111 Climbing	FlightAware ADS-B (JAD / YPJT)
Sun 12:17:43 PM	-32.1952	116.4095	↘ 115°	386.0	444.0	12000.0	1,400 Climbing	Aus ATC (ADS-B)
Sun 12:17:46 PM	-32.1975	116.4153	↘ 115°	387.0	445.0	12075.0	1,200 Climbing	FlightAware ADS-B (PER / YPPH)
Sun 12:17:48 PM	-32.199	116.4191	↘ 113°	388.0	447.0	12100.0	1,625 Climbing	Aus ATC (ADS-B)
Sun 12:17:58 PM	-32.2069	116.4381	↘ 116°	391.0	450.0	12400.0	1,714 Climbing	Aus ATC (ADS-B)
Sun 12:18:16 PM	-32.2221	116.4708	↘ 120°	393.0	452.0	12900.0	1,906 Climbing	FlightAware ADS-B (JAD / YPJT)
Sun 12:18:46 PM	-32.2512	116.5263	↘ 122°	400.0	460.0	13925.0	1,900 Climbing	FlightAware ADS-B (JAD / YPJT)
Sun 12:19:16 PM	-32.2798	116.5805	↘ 122°	410.0	472.0	14800.0	1,868 Climbing	FlightAware ADS-B
Sun 12:19:43 PM	-32.3087	116.6352	↘ 122°	414.0	476.0	15700.0	1,875 Climbing	Aus ATC (ADS-B)
Sun 12:19:48 PM	-32.3137	116.6446	↘ 122°	415.0	478.0	15800.0	1,600 Climbing	Aus ATC (ADS-B)
Sun 12:19:58 PM	-32.324	116.6641	↘ 123°	417.0	480.0	16100.000000000002	1,800 Climbing	Aus ATC (ADS-B)
Sun 12:20:08 PM	-32.3341	116.6833	↘ 122°	418.0	481.0	16400.0	1,917 Climbing	Aus ATC (ADS-B)
Sun 12:20:16 PM	-32.3421	116.6985	↘ 122°	420.0	483.0	16675.0	2,000 Climbing	FlightAware ADS-B (PER / YPPH)
Sun 12:20:23 PM	-32.3495	116.7125	↘ 121°	421.0	484.0	16900.0	1,500 Climbing	Aus ATC (ADS-B)
Sun 12:20:33 PM	-32.3599	116.7322	↘ 123°	424.0	488.0	17100.0	1,600 Climbing	Aus ATC (ADS-B)
Sun 12:20:38 PM	-32.365	116.7418	↘ 122°	425.0	489.0	17300.0	1,846 Climbing	Aus ATC (ADS-B)
Sun 12:20:46 PM	-32.3729	116.7568	↘ 122°	426.0	490.0	17500.0	1,800 Climbing	FlightAware ADS-B (PER / YPPH)
Sun 12:20:48 PM	-32.3755	116.7618	↘ 123°	426.0	490.0	17600.0	2,000 Climbing	Aus ATC (ADS-B)
Sun 12:20:58 PM	-32.3858	116.7815	↘ 122°	428.0	493.0	17900.0	1,600 Climbing	Aus ATC (ADS-B)
Sun 12:21:03 PM	-32.3911	116.7914	↘ 121°	428.0	493.0	18000.0	1,200 Climbing	Aus ATC (ADS-B)
Sun 12:21:08 PM	-32.3964	116.8014	↘ 121°	430.0	495.0	18100.0	2,000 Climbing	Aus ATC (ADS-B)
Sun 12:21:18 PM	-32.4068	116.8214	↘ 121°	430.0	495.0	18500.0	2,000 Climbing	Aus ATC (ADS-B)
Sun 12:21:23 PM	-32.412	116.8313	↘ 121°	430.0	495.0	18600.0	1,800 Climbing	Aus ATC (ADS-B)
Sun 12:21:28 PM	-32.4172	116.8413	↘ 121°	430.0	495.0	18800.0	1,800 Climbing	Aus ATC (ADS-B)
Sun 12:21:33 PM	-32.4225	116.8512	↘ 121°	432.0	497.0	18900.0	1,417 Climbing	Aus ATC (ADS-B)
Sun 12:21:46 PM	-32.4359	116.8769	↘ 122°	435.0	501.0	19225.0	1,500 Climbing	FlightAware ADS-B (JAD / YPJT)
Sun 12:22:16 PM	-32.4681	116.9384	↘ 122°	440.0	506.0	19975.0	1,500 Climbing	FlightAware ADS-B (JAD / YPJT)
Sun 12:22:33 PM	-32.4864	116.9733	↘ 122°	442.0	509.0	20400.0	1,705 Climbing	Aus ATC (ADS-B)
Sun 12:22:38 PM	-32.4917	116.9836	↘ 121°	442.0	509.0	20600.0	1,800 Climbing	Aus ATC (ADS-B)
Sun 12:22:43 PM	-32.4972	116.9939	↘ 123°	443.0	510.0	20700.0	1,125 Climbing	Aus ATC (ADS-B)
Sun 12:22:46 PM	-32.5	116.9994	↘ 122°	444.0	511.0	20750.0	1,200 Climbing	FlightAware ADS-B (BUY / YBUN)
Sun 12:22:48 PM	-32.5025	117.0042	↘ 120°	444.0	511.0	20800.0	1,750 Climbing	Aus ATC (ADS-B)
Sun 12:22:58 PM	-32.5133	117.0248	↘ 122°	446.0	513.0	21100.0	1,600 Climbing	Aus ATC (ADS-B)
Sun 12:23:03 PM	-32.5187	117.0354	↘ 121°	448.0	516.0	21200.0	1,000 Climbing	Aus ATC (ADS-B)
Sun 12:23:04 PM	-32.5204	117.0391	↘ 119°	448.0	516.0	21200.0	1,200 Climbing	FlightAware ADS-B (BUY / YBUN)
Sun 12:23:08 PM	-32.5236	117.046	↘ 118°	449.0	517.0	21300.0	1,313 Climbing	Aus ATC (ADS-B)
Sun 12:23:36 PM	-32.5449	117.1085	→ 106°	461.0	531.0	21900.0	1,333 Climbing	FlightAware ADS-B (JAD / YPJT)
Sun 12:23:53 PM	-32.5535	117.1525	→ 103°	464.0	534.0	22300.0	1,364 Climbing	Aus ATC (ADS-B)
Sun 12:23:58 PM	-32.5557	117.165	→ 102°	465.0	535.0	22400.0	1,200 Climbing	Aus ATC (ADS-B)
Sun 12:24:08 PM	-32.5601	117.1899	→ 102°	465.0	535.0	22600.0	1,500 Climbing	Aus ATC (ADS-B)
Sun 12:24:10 PM	-32.5611	117.1952	→ 102°	466.0	536.0	22700.0	1,406 Climbing	FlightAware ADS-B (YNTM)
Sun 12:24:40 PM	-32.5747	117.2706	→ 102°	470.0	541.0	23350.0	1,256 Climbing	FlightAware ADS-B (YNRG)
Sun 12:24:53 PM	-32.5805	117.3026	→ 102°	471.0	542.0	23600.0	1,435 Climbing	Aus ATC (ADS-B)
Sun 12:25:03 PM	-32.585	117.3279	→ 102°	473.0	544.0	23900.0	1,600 Climbing	Aus ATC (ADS-B)
Sun 12:25:08 PM	-32.5873	117.3403	→ 102°	473.0	544.0	24000.0	857 Climbing	Aus ATC (ADS-B)
Sun 12:25:10 PM	-32.5884	117.3469	→ 102°	474.0	545.0	24000.0	1,200 Climbing	FlightAware ADS-B (YMUL)
Sun 12:25:18 PM	-32.5918	117.3658	→ 102°	474.0	545.0	24200.0	1,304 Climbing	Aus ATC (ADS-B)
Sun 12:25:33 PM	-32.5987	117.4039	→ 102°	476.0	548.0	24500.0	1,091 Climbing	Aus ATC (ADS-B)
Sun 12:25:40 PM	-32.6024	117.4248	→ 102°	478.0	550.0	24600.0	600 Climbing	FlightAware ADS-B (YSEN)
Sun 12:25:43 PM	-32.6033	117.4295	→ 103°	478.0	550.0	24600.0	1,000 Climbing	Aus ATC (ADS-B)
Sun 12:25:58 PM	-32.6101	117.468	→ 102°	480.0	552.0	24900.0	1,200 Climbing	Aus ATC (ADS-B)
Sun 12:26:08 PM	-32.6147	117.4936	→ 102°	481.0	554.0	25100.0	1,125 Climbing	Aus ATC (ADS-B)
Sun 12:26:10 PM	-32.6158	117.4999	→ 102°	481.0	554.0	25125.0	1,200 Climbing	FlightAware ADS-B (YNTM)
Sun 12:26:13 PM	-32.617	117.5065	→ 102°	482.0	555.0	25200.0	1,150 Climbing	Aus ATC (ADS-B)
Sun 12:26:40 PM	-32.6297	117.5779	→ 102°	485.0	558.0	25700.0	1,067 Climbing	FlightAware ADS-B (YNTM)
Sun 12:26:58 PM	-32.6376	117.6231	→ 102°	486.0	559.0	26000.0	1,286 Climbing	Aus ATC (ADS-B)
Sun 12:27:08 PM	-32.6422	117.6493	→ 102°	486.0	559.0	26300.0	1,625 Climbing	Aus ATC (ADS-B)
Sun 12:27:10 PM	-32.6433	117.6552	→ 102°	486.0	559.0	26325.0	1,200 Climbing	FlightAware ADS-B
Sun 12:27:18 PM	-32.6468	117.6751	→ 102°	486.0	559.0	26500.0	1,500 Climbing	Aus ATC (ADS-B)
Sun 12:27:33 PM	-32.6537	117.7143	→ 102°	486.0	559.0	26900.0	1,432 Climbing	Aus ATC (ADS-B)
Sun 12:27:40 PM	-32.6571	117.7338	→ 102°	487.0	560.0	27025.0	1,200 Climbing	FlightAware ADS-B (YSEN)
Sun 12:27:43 PM	-32.6582	117.7402	→ 102°	487.0	560.0	27100.0	1,200 Climbing	Aus ATC (ADS-B)
Sun 12:28:10 PM	-32.671	117.813	→ 102°	489.0	563.0	27625.0	1,111 Climbing	FlightAware ADS-B (YNTM)
Sun 12:28:37 PM	-32.6836	117.8846	→ 102°	494.0	568.0	28100.0	891 Climbing	Aus ATC (ADS-B)
Sun 12:28:42 PM	-32.6859	117.8979	→ 102°	495.0	570.0	28100.0	800 Climbing	Aus ATC (ADS-B)
Sun 12:28:52 PM	-32.6906	117.9243	→ 102°	496.0	571.0	28300.0	960 Climbing	Aus ATC (ADS-B)
Sun 12:29:07 PM	-32.6976	117.9644	→ 102°	500.0	575.0	28500.0	750 Climbing	Aus ATC (ADS-B)
Sun 12:29:10 PM	-32.6986	117.9705	→ 102°	501.0	577.0	28525.0	600 Climbing	FlightAware ADS-B (YGIN)
Sun 12:29:17 PM	-32.7023	117.9914	→ 102°	502.0	578.0	28600.0	968 Climbing	Aus ATC (ADS-B)
Sun 12:29:41 PM	-32.7136	118.0564	→ 102°	506.0	582.0	29025.0	1,029 Climbing	FlightAware ADS-B (YSEN)
Sun 12:29:52 PM	-32.7187	118.0861	→ 101°	507.0	583.0	29200.0	1,031 Climbing	Aus ATC (ADS-B)
Sun 12:29:57 PM	-32.721	118.0996	→ 102°	508.0	585.0	29300.0	800 Climbing	Aus ATC (ADS-B)
Sun 12:30:07 PM	-32.7258	118.127	→ 102°	510.0	587.0	29400.0	800 Climbing	Aus ATC (ADS-B)
Sun 12:30:12 PM	-32.7282	118.1407	→ 102°	512.0	589.0	29500.0	1,200 Climbing	Aus ATC (ADS-B)
Sun 12:30:17 PM	-32.7305	118.1543	→ 102°	511.0	588.0	29600.0	1,200 Climbing	Aus ATC (ADS-B)
Sun 12:30:22 PM	-32.7329	118.1682	→ 101°	512.0	589.0	29700.0	1,200 Climbing	Aus ATC (ADS-B)
Sun 12:30:27 PM	-32.7352	118.1818	→ 101°	513.0	590.0	29800.0	800 Climbing	Aus ATC (ADS-B)
Sun 12:30:37 PM	-32.74	118.2095	→ 102°	514.0	592.0	29900.0	800 Climbing	Aus ATC (ADS-B)
Sun 12:30:42 PM	-32.7423	118.2231	→ 101°	515.0	593.0	30000.0	1,200 Climbing	Aus ATC (ADS-B)
Sun 12:30:52 PM	-32.7471	118.2508	→ 102°	516.0	594.0	30200.0	960 Climbing	Aus ATC (ADS-B)
Sun 12:31:07 PM	-32.7542	118.2925	→ 101°	518.0	596.0	30400.0	868 Climbing	Aus ATC (ADS-B)
Sun 12:31:11 PM	-32.7561	118.304	→ 101°	519.0	597.0	30475.0	1,200 Climbing	FlightAware ADS-B (YSEN)
Sun 12:31:17 PM	-32.7589	118.3204	→ 102°	520.0	598.0	30600.0	844 Climbing	Aus ATC (ADS-B)
Sun 12:31:27 PM	-32.7637	118.3485	→ 101°	522.0	601.0	30700.0	1,200 Climbing	Aus ATC (ADS-B)
Sun 12:31:32 PM	-32.7661	118.3622	→ 101°	522.0	601.0	30900.0	1,600 Climbing	Aus ATC (ADS-B)
Sun 12:31:42 PM	-32.7709	118.3902	→ 101°	521.0	600.0	31100.0	1,600 Climbing	Aus ATC (ADS-B)
Sun 12:31:47 PM	-32.7732	118.4042	→ 101°	520.0	598.0	31300.0	1,800 Climbing	Aus ATC (ADS-B)
Sun 12:31:52 PM	-32.7756	118.4181	→ 101°	520.0	598.0	31400.0	1,200 Climbing	Aus ATC (ADS-B)
Sun 12:31:57 PM	-32.778	118.4323	→ 101°	519.0	597.0	31500.0	1,600 Climbing	Aus ATC (ADS-B)
Sun 12:32:07 PM	-32.7827	118.4599	→ 101°	518.0	596.0	31800.0	1,929 Climbing	Aus ATC (ADS-B)
Sun 12:32:11 PM	-32.7846	118.4712	→ 101°	517.0	595.0	31950.0	2,400 Climbing	FlightAware ADS-B (YGIN)
Sun 12:32:12 PM	-32.785	118.4738	→ 101°	517.0	595.0	32000.0	1,500 Climbing	Aus ATC (ADS-B)
Sun 12:32:17 PM	-32.7874	118.4878	→ 102°	517.0	595.0	32100.0	1,603 Climbing	Aus ATC (ADS-B)
Sun 12:32:41 PM	-32.799	118.556	→ 101°	515.0	593.0	32775.0	1,714 Climbing	FlightAware ADS-B (YSEN)
Sun 12:32:52 PM	-32.8037	118.5845	→ 101°	513.0	590.0	33100.0	1,673 Climbing	Aus ATC (ADS-B)
Sun 12:33:07 PM	-32.8107	118.6257	→ 101°	511.0	588.0	33500.0	1,737 Climbing	Aus ATC (ADS-B)
Sun 12:33:11 PM	-32.8126	118.6373	→ 101°	510.0	587.0	33650.0	1,800 Climbing	FlightAware ADS-B (YNRG)
Sun 12:33:17 PM	-32.8153	118.6532	→ 101°	509.0	586.0	33800.0	1,688 Climbing	Aus ATC (ADS-B)
Sun 12:33:27 PM	-32.8199	118.6803	→ 101°	507.0	583.0	34100.0	2,000 Climbing	Aus ATC (ADS-B)
Sun 12:33:32 PM	-32.8221	118.6939	→ 101°	505.0	581.0	34300.0	2,000 Climbing	Aus ATC (ADS-B)
Sun 12:33:42 PM	-32.8267	118.721	→ 101°	502.0	578.0	34600.0	2,100 Climbing	Aus ATC (ADS-B)
Sun 12:33:52 PM	-32.8312	118.7478	→ 101°	499.0	574.0	35000.0	2,000 Climbing	Aus ATC (ADS-B)
Sun 12:33:57 PM	-32.8334	118.7612	→ 101°	499.0	574.0	35100.0	1,800 Climbing	Aus ATC (ADS-B)
Sun 12:34:12 PM	-32.8402	118.8012	→ 101°	494.0	568.0	35600.0	1,800 Climbing	Aus ATC (ADS-B)
Sun 12:34:17 PM	-32.8423	118.8144	→ 101°	494.0	568.0	35700.0	1,200 Climbing	Aus ATC (ADS-B)
Sun 12:34:22 PM	-32.8446	118.8276	→ 101°	494.0	568.0	35800.0	1,200 Climbing	Aus ATC (ADS-B)
Sun 12:34:27 PM	-32.8468	118.8409	→ 101°	494.0	568.0	35900.0	1,200 Climbing	Aus ATC (ADS-B)
Sun 12:34:37 PM	-32.8512	118.8676	→ 101°	494.0	568.0	36100.0	1,200 Climbing	Aus ATC (ADS-B)
Sun 12:34:42 PM	-32.8534	118.8807	→ 102°	494.0	568.0	36200.0	1,200 Climbing	Aus ATC (ADS-B)
Sun 12:34:52 PM	-32.8579	118.9072	→ 101°	494.0	568.0	36400.0	900 Climbing	Aus ATC (ADS-B)
Sun 12:35:02 PM	-32.8623	118.9338	→ 101°	493.0	567.0	36500.0	825 Climbing	Aus ATC (ADS-B)
Sun 12:35:12 PM	-32.8668	118.9611	→ 101°	493.0	567.0	36675.0	1,200 Climbing	FlightAware ADS-B (YSEN)
Sun 12:35:17 PM	-32.8689	118.9734	→ 101°	493.0	567.0	36800.0	950 Climbing	Aus ATC (ADS-B)
Sun 12:35:42 PM	-32.8795	119.0384	→ 101°	493.0	567.0	37150.0	857 Climbing	FlightAware ADS-B (YNRG)
Sun 12:35:52 PM	-32.8841	119.0663	→ 101°	493.0	567.0	37300.0	1,000 Climbing	Aus ATC (ADS-B)
Sun 12:35:57 PM	-32.8862	119.0795	→ 101°	492.0	566.0	37400.0	1,200 Climbing	Aus ATC (ADS-B)
Sun 12:36:02 PM	-32.8885	119.0928	→ 101°	492.0	566.0	37500.0	800 Climbing	Aus ATC (ADS-B)
Sun 12:36:12 PM	-32.8928	119.1193	→ 101°	492.0	566.0	37600.0	800 Climbing	Aus ATC (ADS-B)
Sun 12:36:17 PM	-32.895	119.1324	→ 101°	493.0	567.0	37700.0	400 Climbing	Aus ATC (ADS-B)
Sun 12:36:27 PM	-32.8994	119.1591	→ 101°	494.0	568.0	37700.0	300 Climbing	Aus ATC (ADS-B)
Sun 12:36:37 PM	-32.9037	119.1856	→ 101°	496.0	571.0	37800.0	500 Climbing	Aus ATC (ADS-B)
Sun 12:36:42 PM	-32.9058	119.1986	→ 101°	496.0	571.0	37825.0	400 Climbing	FlightAware ADS-B (YNRG)
Sun 12:36:52 PM	-32.9103	119.2258	→ 101°	496.0	571.0	37900.0	825 Climbing	Aus ATC (ADS-B)
Sun 12:37:02 PM	-32.9146	119.2525	→ 101°	496.0	571.0	38100.0	960 Climbing	Aus ATC (ADS-B)
Sun 12:37:17 PM	-32.9211	119.2924	→ 101°	496.0	571.0	38300.0	720 Climbing	Aus ATC (ADS-B)
Sun 12:37:27 PM	-32.9254	119.3191	→ 101°	496.0	571.0	38400.0	429 Climbing	Aus ATC (ADS-B)
Sun 12:37:31 PM	-32.9276	119.3326	→ 101°	497.0	572.0	38400.0	600 Climbing	Aus ATC (ADS-B)
Sun 12:37:37 PM	-32.9298	119.346	→ 101°	497.0	572.0	38500.0	818 Climbing	Aus ATC (ADS-B)
Sun 12:37:42 PM	-32.9323	119.3613	→ 101°	496.0	571.0	38550.0	400 Climbing	FlightAware ADS-B (BUY / YBUN)
Sun 12:37:52 PM	-32.9362	119.386	→ 101°	497.0	572.0	38600.0	600 Climbing	Aus ATC (ADS-B)
Sun 12:37:57 PM	-32.9384	119.3993	→ 101°	497.0	572.0	38700.0	667 Climbing	Aus ATC (ADS-B)
Sun 12:38:01 PM	-32.9406	119.4126	→ 101°	497.0	572.0	38700.0	857 Climbing	Aus ATC (ADS-B)
Sun 12:38:11 PM	-32.9449	119.4395	→ 101°	497.0	572.0	38900.0	1,091 Climbing	Aus ATC (ADS-B)
Sun 12:38:12 PM	-32.9457	119.4444	→ 101°	497.0	572.0	38900.0	136 Climbing	FlightAware ADS-B (KGI / YPKG)
Sun 12:38:44 PM	-32.959	119.5272	→ 101°	496.0	571.0	38975.0	154 Climbing	FlightAware ADS-B (YBEV)
Sun 12:38:51 PM	-32.962	119.5462	→ 101°	496.0	571.0	39000.0	88 Climbing	Aus ATC (ADS-B)
Sun 12:39:01 PM	-32.9663	119.5729	→ 101°	496.0	571.0	39000.0	Level	Aus ATC (ADS-B)
Sun 12:39:11 PM	-32.9706	119.5998	→ 101°	496.0	571.0	39000.0	-107 Descending	Aus ATC (ADS-B)
Sun 12:39:15 PM	-32.972	119.6083	→ 101°	496.0	571.0	38975.0	Level	FlightAware ADS-B (YBEV)
Sun 12:39:16 PM	-32.9727	119.613	→ 100°	496.0	571.0	39000.0	136 Climbing	Aus ATC (ADS-B)
Sun 12:39:26 PM	-32.977	119.6397	→ 101°	496.0	571.0	39000.0	Level	Aus ATC (ADS-B)
Sun 12:39:36 PM	-32.9813	119.6663	→ 101°	496.0	571.0	39000.0	Level	Aus ATC (ADS-B)
Sun 12:39:41 PM	-32.9834	119.6798	→ 100°	497.0	572.0	39000.0	Level	Aus ATC (ADS-B)
Sun 12:39:45 PM	-32.9853	119.692	→ 101°	497.0	572.0	39000.0	Level	FlightAware ADS-B (KGI / YPKG)
Sun 12:39:46 PM	-32.9855	119.6933	→ 98°	497.0	572.0	39000.0	Level	Aus ATC (ADS-B)
Sun 12:39:56 PM	-32.9898	119.72	→ 101°	497.0	572.0	39000.0	Level	Aus ATC (ADS-B)
Sun 12:40:01 PM	-32.9919	119.7333	→ 101°	497.0	572.0	39000.0	Level	Aus ATC (ADS-B)
Sun 12:40:06 PM	-32.994	119.7467	→ 100°	497.0	572.0	39000.0	Level	Aus ATC (ADS-B)
Sun 12:40:11 PM	-32.9961	119.7601	→ 101°	497.0	572.0	39000.0	Level	Aus ATC (ADS-B)
Sun 12:40:21 PM	-33.0004	119.7869	→ 101°	497.0	572.0	39000.0	Level	Aus ATC (ADS-B)
Sun 12:40:25 PM	-33.0018	119.796	→ 101°	496.0	571.0	39000.0	Level	FlightAware ADS-B (YBEV)
Sun 12:40:36 PM	-33.0067	119.8268	→ 101°	496.0	571.0	39000.0	Level	Aus ATC (ADS-B)
Sun 12:40:46 PM	-33.0109	119.8537	→ 101°	495.0	570.0	39000.0	Level	Aus ATC (ADS-B)
Sun 12:40:56 PM	-33.0152	119.8804	→ 101°	495.0	570.0	39000.0	Level	Aus ATC (ADS-B)
Sun 12:40:59 PM	-33.0163	119.8876	→ 101°	495.0	570.0	39000.0	Level	FlightAware ADS-B (YKBL)
Sun 12:41:01 PM	-33.0173	119.8938	→ 101°	495.0	570.0	39000.0	Level	Aus ATC (ADS-B)
Sun 12:41:11 PM	-33.0215	119.9204	→ 101°	495.0	570.0	39000.0	Level	Aus ATC (ADS-B)
Sun 12:41:16 PM	-33.0236	119.934	→ 100°	495.0	570.0	39000.0	Level	Aus ATC (ADS-B)
Sun 12:41:21 PM	-33.0257	119.9474	→ 101°	495.0	570.0	39000.0	Level	Aus ATC (ADS-B)
Sun 12:41:26 PM	-33.0278	119.9605	→ 101°	495.0	570.0	39000.0	Level	Aus ATC (ADS-B)
Sun 12:41:31 PM	-33.0299	119.9741	→ 101°	495.0	570.0	39000.0	Level	Aus ATC (ADS-B)
Sun 12:41:34 PM	-33.0314	119.9837	→ 101°	495.0	570.0	39000.0	Level	FlightAware ADS-B (KGI / YPKG)
Sun 12:41:41 PM	-33.0341	120.0008	→ 101°	495.0	570.0	39000.0	Level	Aus ATC (ADS-B)
Sun 12:41:46 PM	-33.0361	120.0141	→ 101°	495.0	570.0	39000.0	Level	Aus ATC (ADS-B)
Sun 12:41:56 PM	-33.0403	120.0408	→ 101°	495.0	570.0	39000.0	Level	Aus ATC (ADS-B)
Sun 12:42:06 PM	-33.0445	120.0674	→ 101°	496.0	571.0	39000.0	Level	Aus ATC (ADS-B)
Sun 12:42:11 PM	-33.0469	120.0828	→ 100°	496.0	571.0	39000.0	Level	FlightAware ADS-B (ALH / YABA)
Sun 12:42:21 PM	-33.0507	120.1077	→ 101°	497.0	572.0	39000.0	Level	Aus ATC (ADS-B)
Sun 12:42:26 PM	-33.0528	120.1211	→ 101°	497.0	572.0	39000.0	Level	Aus ATC (ADS-B)
Sun 12:42:31 PM	-33.0549	120.1344	→ 101°	497.0	572.0	39000.0	Level	Aus ATC (ADS-B)
Sun 12:43:04 PM	-33.0689	120.2247	→ 100°	498.0	573.0	39000.0	-23 Descending	FlightAware ADS-B (KGI / YPKG)
Sun 12:43:36 PM	-33.0823	120.312	→ 100°	498.0	573.0	38975.0	Level	FlightAware ADS-B (ALH / YABA)
Sun 12:43:41 PM	-33.084	120.3228	→ 100°	498.0	573.0	39000.0	150 Climbing	Aus ATC (ADS-B)
Sun 12:43:46 PM	-33.0861	120.3361	→ 101°	498.0	573.0	39000.0	Level	Aus ATC (ADS-B)
Sun 12:43:56 PM	-33.0902	120.363	→ 100°	498.0	573.0	39000.0	-75 Descending	Aus ATC (ADS-B)
Sun 12:44:06 PM	-33.0948	120.3931	→ 100°	498.0	573.0	38975.0	Level	FlightAware ADS-B (ALH / YABA)
Sun 12:44:11 PM	-33.0964	120.4034	→ 100°	498.0	573.0	39000.0	100 Climbing	Aus ATC (ADS-B)
Sun 12:44:21 PM	-33.1005	120.4304	→ 100°	499.0	574.0	39000.0	Level	Aus ATC (ADS-B)
Sun 12:44:31 PM	-33.1046	120.4573	→ 100°	499.0	574.0	39000.0	Level	Aus ATC (ADS-B)
Sun 12:44:36 PM	-33.1067	120.4707	→ 100°	499.0	574.0	39000.0	Level	Aus ATC (ADS-B)
Sun 12:44:46 PM	-33.1108	120.4978	→ 100°	500.0	575.0	39000.0	-63 Descending	Aus ATC (ADS-B)
Sun 12:45:00 PM	-33.1167	120.5368	→ 100°	500.0	575.0	38975.0	Level	FlightAware ADS-B (KGI / YPKG)
Sun 12:45:34 PM	-33.1305	120.6277	→ 100°	500.0	575.0	39000.0	37 Climbing	FlightAware ADS-B (KGI / YPKG)
Sun 12:45:41 PM	-33.1333	120.6463	→ 100°	500.0	575.0	39000.0	Level	Aus ATC (ADS-B)
Sun 12:45:46 PM	-33.1353	120.6599	→ 100°	500.0	575.0	39000.0	Level	Aus ATC (ADS-B)
Sun 12:45:56 PM	-33.1394	120.6867	→ 100°	500.0	575.0	39000.0	Level	Aus ATC (ADS-B)
Sun 12:46:06 PM	-33.1435	120.7138	→ 100°	500.0	575.0	39000.0	Level	Aus ATC (ADS-B)
Sun 12:46:11 PM	-33.1455	120.7275	→ 100°	500.0	575.0	39000.0	Level	Aus ATC (ADS-B)
Sun 12:46:17 PM	-33.148	120.7443	→ 100°	500.0	575.0	39000.0	Level	FlightAware ADS-B (YKBL)
Sun 12:46:21 PM	-33.1496	120.7544	→ 100°	500.0	575.0	39000.0	Level	Aus ATC (ADS-B)
Sun 12:46:26 PM	-33.1516	120.768	→ 100°	500.0	575.0	39000.0	Level	Aus ATC (ADS-B)
Sun 12:46:36 PM	-33.1556	120.795	→ 100°	500.0	575.0	39000.0	Level	Aus ATC (ADS-B)
Sun 12:46:46 PM	-33.1597	120.8219	→ 100°	500.0	575.0	39000.0	Level	Aus ATC (ADS-B)
Sun 12:46:51 PM	-33.1617	120.8354	→ 100°	500.0	575.0	39000.0	Level	Aus ATC (ADS-B)
Sun 12:46:56 PM	-33.1637	120.849	→ 100°	500.0	575.0	39000.0	Level	Aus ATC (ADS-B)
Sun 12:47:06 PM	-33.1677	120.8762	→ 100°	500.0	575.0	39000.0	Level	Aus ATC (ADS-B)
Sun 12:47:11 PM	-33.1698	120.8897	→ 100°	500.0	575.0	39000.0	Level	Aus ATC (ADS-B)
Sun 12:47:16 PM	-33.1718	120.903	→ 100°	500.0	575.0	39000.0	Level	Aus ATC (ADS-B)
Sun 12:47:21 PM	-33.1738	120.9166	→ 100°	500.0	575.0	39000.0	Level	Aus ATC (ADS-B)
Sun 12:47:31 PM	-33.1778	120.9436	→ 100°	501.0	577.0	39000.0	Level	Aus ATC (ADS-B)
Sun 12:47:36 PM	-33.1798	120.9573	→ 100°	501.0	577.0	39000.0	Level	Aus ATC (ADS-B)
Sun 12:47:46 PM	-33.1838	120.9843	→ 100°	501.0	577.0	39000.0	Level	Aus ATC (ADS-B)
Sun 12:47:47 PM	-33.1843	120.9874	→ 100°	501.0	577.0	39000.0	Level	FlightAware ADS-B (YKBL)
Sun 12:47:56 PM	-33.1878	121.0113	→ 100°	501.0	577.0	39000.0	Level	Aus ATC (ADS-B)
Sun 12:48:06 PM	-33.1919	121.0387	→ 100°	501.0	577.0	39000.0	Level	Aus ATC (ADS-B)
Sun 12:48:11 PM	-33.1938	121.0519	→ 100°	501.0	577.0	39000.0	Level	Aus ATC (ADS-B)
Sun 12:48:21 PM	-33.1979	121.0793	→ 100°	501.0	577.0	39000.0	Level	Aus ATC (ADS-B)
Sun 12:48:30 PM	-33.2018	121.1062	→ 100°	501.0	577.0	39000.0	Level	Aus ATC (ADS-B)
Sun 12:48:35 PM	-33.2038	121.1197	→ 100°	501.0	577.0	39000.0	Level	Aus ATC (ADS-B)
Sun 12:48:45 PM	-33.2078	121.1469	→ 100°	501.0	577.0	39000.0	Level	Aus ATC (ADS-B)
Sun 12:48:50 PM	-33.2098	121.1606	→ 100°	501.0	577.0	39000.0	Level	Aus ATC (ADS-B)
Sun 12:49:03 PM	-33.2152	121.1969	→ 100°	500.0	575.0	39000.0	Level	FlightAware ADS-B (KGI / YPKG)
Sun 12:49:30 PM	-33.2256	121.2688	→ 100°	501.0	577.0	39000.0	-48 Descending	Aus ATC (ADS-B)
Sun 12:49:34 PM	-33.2274	121.2814	→ 100°	500.0	575.0	38975.0	Level	FlightAware ADS-B (KGI / YPKG)
Sun 12:49:40 PM	-33.2296	121.2961	→ 99°	500.0	575.0	39000.0	71 Climbing	Aus ATC (ADS-B)
Sun 12:49:55 PM	-33.2355	121.3366	→ 100°	500.0	575.0	39000.0	Level	Aus ATC (ADS-B)
Sun 12:50:17 PM	-33.2442	121.397	→ 100°	499.0	574.0	39000.0	Level	FlightAware ADS-B (YKBL)
Sun 12:50:30 PM	-33.2492	121.4315	→ 100°	499.0	574.0	39000.0	Level	Aus ATC (ADS-B)
Sun 12:50:35 PM	-33.2511	121.445	→ 100°	499.0	574.0	39000.0	Level	Aus ATC (ADS-B)
Sun 12:50:40 PM	-33.2531	121.4586	→ 100°	500.0	575.0	39000.0	Level	Aus ATC (ADS-B)
Sun 12:50:50 PM	-33.257	121.4857	→ 100°	500.0	575.0	39000.0	Level	Aus ATC (ADS-B)
Sun 12:51:00 PM	-33.2609	121.5128	→ 100°	500.0	575.0	39000.0	Level	Aus ATC (ADS-B)
Sun 12:51:05 PM	-33.2628	121.5263	→ 100°	500.0	575.0	39000.0	Level	Aus ATC (ADS-B)
Sun 12:51:15 PM	-33.2667	121.5534	→ 100°	500.0	575.0	39000.0	Level	Aus ATC (ADS-B)
Sun 12:51:25 PM	-33.2706	121.5804	→ 100°	500.0	575.0	39000.0	Level	Aus ATC (ADS-B)
Sun 12:51:40 PM	-33.2764	121.6212	→ 100°	500.0	575.0	39000.0	-71 Descending	Aus ATC (ADS-B)
Sun 12:51:46 PM	-33.2788	121.6376	→ 100°	500.0	575.0	38975.0	Level	FlightAware ADS-B (YKBL)
Sun 12:51:50 PM	-33.2803	121.6485	→ 100°	500.0	575.0	39000.0	167 Climbing	Aus ATC (ADS-B)
Sun 12:51:55 PM	-33.2822	121.662	→ 99°	500.0	575.0	39000.0	Level	Aus ATC (ADS-B)
Sun 12:52:00 PM	-33.2841	121.6756	→ 100°	500.0	575.0	39000.0	Level	Aus ATC (ADS-B)
Sun 12:52:05 PM	-33.2861	121.6892	→ 100°	500.0	575.0	39000.0	Level	Aus ATC (ADS-B)
Sun 12:52:15 PM	-33.2899	121.7163	→ 100°	500.0	575.0	39000.0	Level	Aus ATC (ADS-B)
Sun 12:52:20 PM	-33.2919	121.7299	→ 100°	500.0	575.0	39000.0	Level	Aus ATC (ADS-B)
Sun 12:52:25 PM	-33.2938	121.7435	→ 100°	500.0	575.0	39000.0	Level	Aus ATC (ADS-B)
Sun 12:52:35 PM	-33.2977	121.7706	→ 100°	500.0	575.0	39000.0	Level	Aus ATC (ADS-B)
Sun 12:52:46 PM	-33.3015	121.7978	→ 100°	501.0	577.0	39000.0	Level	Aus ATC (ADS-B)
Sun 12:52:50 PM	-33.3034	121.8113	→ 100°	501.0	577.0	39000.0	Level	Aus ATC (ADS-B)
Sun 12:53:00 PM	-33.3072	121.8384	→ 99°	501.0	577.0	39000.0	Level	Aus ATC (ADS-B)
Sun 12:53:15 PM	-33.313	121.8792	→ 99°	502.0	578.0	39000.0	Level	Aus ATC (ADS-B)
Sun 12:53:25 PM	-33.3168	121.9066	→ 99°	502.0	578.0	39000.0	Level	Aus ATC (ADS-B)
Sun 12:53:35 PM	-33.3206	121.9337	→ 100°	503.0	579.0	39000.0	Level	Aus ATC (ADS-B)
Sun 12:53:40 PM	-33.3225	121.9475	→ 100°	503.0	579.0	39000.0	Level	Aus ATC (ADS-B)
Sun 12:53:50 PM	-33.3263	121.9748	→ 100°	503.0	579.0	39000.0	Level	Aus ATC (ADS-B)
Sun 12:53:55 PM	-33.3282	121.9884	→ 100°	503.0	579.0	39000.0	Level	Aus ATC (ADS-B)
Sun 12:54:00 PM	-33.3301	122.0021	→ 99°	503.0	579.0	39000.0	Level	Aus ATC (ADS-B)
Sun 12:54:10 PM	-33.3339	122.0294	→ 99°	503.0	579.0	39000.0	Level	Aus ATC (ADS-B)
Sun 12:54:20 PM	-33.3377	122.0566	→ 99°	503.0	579.0	39000.0	Level	Aus ATC (ADS-B)
Sun 12:54:25 PM	-33.3396	122.0704	→ 99°	502.0	578.0	39000.0	Level	Aus ATC (ADS-B)
Sun 12:54:35 PM	-33.3433	122.0975	→ 99°	502.0	578.0	39000.0	Level	Aus ATC (ADS-B)
Sun 12:54:45 PM	-33.3471	122.1249	→ 99°	502.0	578.0	39000.0	Level	Aus ATC (ADS-B)
Sun 12:54:57 PM	-33.3517	122.1579	→ 99°	502.0	578.0	39000.0	Level	FlightAware ADS-B (YKBL)
Sun 12:55:35 PM	-33.366	122.2612	→ 99°	503.0	579.0	39000.0	Level	Aus ATC (ADS-B)
Sun 12:55:40 PM	-33.3679	122.275	→ 99°	503.0	579.0	39000.0	Level	Aus ATC (ADS-B)
Sun 12:55:45 PM	-33.3697	122.2886	→ 99°	503.0	579.0	39000.0	Level	Aus ATC (ADS-B)
Sun 12:55:55 PM	-33.3734	122.3159	→ 99°	502.0	578.0	39000.0	-42 Descending	Aus ATC (ADS-B)
Sun 12:56:21 PM	-33.3834	122.3888	→ 99°	500.0	575.0	38975.0	Level	FlightAware ADS-B (YKBL)
Sun 12:56:35 PM	-33.3883	122.4249	→ 99°	501.0	577.0	39000.0	63 Climbing	Aus ATC (ADS-B)
Sun 12:56:45 PM	-33.3919	122.4519	→ 99°	501.0	577.0	39000.0	Level	Aus ATC (ADS-B)
Sun 12:56:55 PM	-33.3957	122.4793	→ 99°	501.0	577.0	39000.0	Level	Aus ATC (ADS-B)
Sun 12:57:00 PM	-33.3975	122.4928	→ 99°	501.0	577.0	39000.0	Level	Aus ATC (ADS-B)
Sun 12:57:05 PM	-33.3994	122.5066	→ 99°	501.0	577.0	39000.0	Level	Aus ATC (ADS-B)
Sun 12:57:08 PM	-33.4007	122.5167	→ 99°	500.0	575.0	39000.0	Level	FlightAware ADS-B (KGI / YPKG)
Sun 12:57:10 PM	-33.4012	122.52	→ 100°	501.0	577.0	39000.0	Level	Aus ATC (ADS-B)
Sun 12:57:20 PM	-33.4049	122.5472	→ 99°	501.0	577.0	39000.0	Level	Aus ATC (ADS-B)
Sun 12:57:25 PM	-33.4068	122.5611	→ 99°	501.0	577.0	39000.0	Level	Aus ATC (ADS-B)
Sun 12:57:30 PM	-33.4086	122.5745	→ 99°	501.0	577.0	39000.0	Level	Aus ATC (ADS-B)
Sun 12:57:40 PM	-33.4122	122.6018	→ 99°	501.0	577.0	39000.0	Level	Aus ATC (ADS-B)
Sun 12:57:50 PM	-33.4159	122.629	→ 99°	501.0	577.0	39000.0	Level	Aus ATC (ADS-B)
Sun 12:57:55 PM	-33.4177	122.6427	→ 99°	501.0	577.0	39000.0	Level	Aus ATC (ADS-B)
Sun 12:58:05 PM	-33.4214	122.6702	→ 99°	501.0	577.0	39000.0	Level	Aus ATC (ADS-B)
Sun 12:58:15 PM	-33.425	122.6973	→ 99°	501.0	577.0	39000.0	Level	Aus ATC (ADS-B)
Sun 12:58:29 PM	-33.4304	122.7382	→ 99°	500.0	575.0	39000.0	-88 Descending	Aus ATC (ADS-B)
Sun 12:58:32 PM	-33.431	122.7422	→ 99°	500.0	575.0	38975.0	Level	FlightAware ADS-B (KGI / YPKG)
Sun 12:58:39 PM	-33.4341	122.7655	→ 99°	499.0	574.0	39000.0	83 Climbing	Aus ATC (ADS-B)
Sun 12:58:50 PM	-33.4377	122.7926	→ 99°	499.0	574.0	39000.0	Level	Aus ATC (ADS-B)
Sun 12:58:54 PM	-33.4395	122.8062	→ 99°	498.0	573.0	39000.0	Level	Aus ATC (ADS-B)
Sun 12:59:04 PM	-33.443	122.8333	→ 99°	497.0	572.0	39000.0	Level	Aus ATC (ADS-B)
Sun 12:59:09 PM	-33.4449	122.8469	→ 99°	497.0	572.0	39000.0	Level	Aus ATC (ADS-B)
Sun 12:59:14 PM	-33.4466	122.8602	→ 99°	497.0	572.0	39000.0	Level	Aus ATC (ADS-B)
Sun 12:59:19 PM	-33.4485	122.8739	→ 99°	497.0	572.0	39000.0	Level	Aus ATC (ADS-B)
Sun 12:59:24 PM	-33.4502	122.8873	→ 99°	497.0	572.0	39000.0	Level	Aus ATC (ADS-B)
Sun 12:59:33 PM	-33.4532	122.9103	→ 99°	497.0	572.0	39000.0	Level	FlightAware ADS-B (KGI / YPKG)
Sun 12:59:34 PM	-33.4538	122.9145	→ 99°	497.0	572.0	39000.0	Level	Aus ATC (ADS-B)
Sun 12:59:39 PM	-33.4556	122.928	→ 99°	497.0	572.0	39000.0	Level	Aus ATC (ADS-B)
Sun 12:59:44 PM	-33.4574	122.9415	→ 99°	497.0	572.0	39000.0	Level	Aus ATC (ADS-B)
Sun 12:59:49 PM	-33.4592	122.9552	→ 99°	497.0	572.0	39000.0	Level	Aus ATC (ADS-B)
Sun 01:00:33 PM	-33.4745	123.0725	→ 99°	498.0	573.0	39000.0	Level	FlightAware ADS-B (KGI / YPKG)
Sun 01:00:34 PM	-33.4751	123.077	→ 100°	498.0	573.0	39000.0	Level	Aus ATC (ADS-B)
Sun 01:00:39 PM	-33.4769	123.0905	→ 99°	497.0	572.0	39000.0	Level	Aus ATC (ADS-B)
Sun 01:00:49 PM	-33.4804	123.1176	→ 99°	498.0	573.0	39000.0	Level	Aus ATC (ADS-B)
Sun 01:00:54 PM	-33.4821	123.131	→ 99°	498.0	573.0	39000.0	Level	Aus ATC (ADS-B)
Sun 01:00:59 PM	-33.4839	123.1448	→ 99°	498.0	573.0	39000.0	Level	Aus ATC (ADS-B)
Sun 01:01:04 PM	-33.4857	123.1583	→ 99°	498.0	573.0	39000.0	Level	Aus ATC (ADS-B)
Sun 01:01:09 PM	-33.4874	123.172	→ 98°	498.0	573.0	39000.0	Level	Aus ATC (ADS-B)
Sun 01:01:19 PM	-33.4909	123.1989	→ 99°	498.0	573.0	39000.0	Level	Aus ATC (ADS-B)
Sun 01:01:24 PM	-33.4927	123.2126	→ 99°	498.0	573.0	39000.0	Level	Aus ATC (ADS-B)
Sun 01:01:29 PM	-33.4944	123.2263	→ 99°	498.0	573.0	39000.0	Level	Aus ATC (ADS-B)
Sun 01:01:34 PM	-33.4962	123.2397	→ 99°	498.0	573.0	39000.0	Level	Aus ATC (ADS-B)
Sun 01:01:44 PM	-33.4997	123.2669	→ 99°	497.0	572.0	39000.0	Level	Aus ATC (ADS-B)
Sun 01:01:54 PM	-33.5032	123.2939	→ 99°	498.0	573.0	39000.0	Level	Aus ATC (ADS-B)
Sun 01:01:59 PM	-33.5049	123.3074	→ 99°	498.0	573.0	39000.0	Level	Aus ATC (ADS-B)
Sun 01:02:09 PM	-33.5084	123.3347	→ 99°	498.0	573.0	39000.0	Level	Aus ATC (ADS-B)
Sun 01:02:19 PM	-33.5118	123.3617	→ 99°	498.0	573.0	39000.0	Level	Aus ATC (ADS-B)
Sun 01:02:24 PM	-33.5135	123.3753	→ 99°	498.0	573.0	39000.0	Level	Aus ATC (ADS-B)
Sun 01:02:34 PM	-33.517	123.4024	→ 99°	498.0	573.0	39000.0	Level	Aus ATC (ADS-B)
Sun 01:02:44 PM	-33.5205	123.4296	→ 99°	498.0	573.0	39000.0	Level	Aus ATC (ADS-B)
Sun 01:02:49 PM	-33.5222	123.443	→ 99°	497.0	572.0	39000.0	Level	Aus ATC (ADS-B)
Sun 01:02:54 PM	-33.5239	123.4568	→ 99°	498.0	573.0	39000.0	Level	Aus ATC (ADS-B)
Sun 01:02:59 PM	-33.5257	123.4701	→ 99°	498.0	573.0	39000.0	Level	Aus ATC (ADS-B)
Sun 01:03:09 PM	-33.5291	123.4974	→ 99°	497.0	572.0	39000.0	Level	Aus ATC (ADS-B)
Sun 01:03:14 PM	-33.5308	123.5109	→ 99°	497.0	572.0	39000.0	Level	Aus ATC (ADS-B)
Sun 01:03:19 PM	-33.5325	123.5245	→ 99°	497.0	572.0	39000.0	Level	Aus ATC (ADS-B)
Sun 01:03:29 PM	-33.536	123.5518	→ 99°	497.0	572.0	39000.0	Level	Aus ATC (ADS-B)
Sun 01:03:39 PM	-33.5394	123.5789	→ 99°	497.0	572.0	39000.0	Level	Aus ATC (ADS-B)
Sun 01:03:44 PM	-33.5411	123.5924	→ 99°	497.0	572.0	39000.0	Level	Aus ATC (ADS-B)
Sun 01:03:54 PM	-33.5445	123.6196	→ 99°	497.0	572.0	39000.0	Level	Aus ATC (ADS-B)
Sun 01:04:04 PM	-33.5479	123.6467	→ 99°	497.0	572.0	39000.0	Level	Aus ATC (ADS-B)
Sun 01:04:19 PM	-33.5531	123.6873	→ 99°	497.0	572.0	39000.0	Level	Aus ATC (ADS-B)
Sun 01:04:29 PM	-33.5565	123.7147	→ 98°	498.0	573.0	39000.0	Level	Aus ATC (ADS-B)
Sun 01:04:34 PM	-33.5581	123.7283	→ 99°	498.0	573.0	39000.0	Level	Aus ATC (ADS-B)
Sun 01:04:39 PM	-33.5598	123.7418	→ 99°	499.0	574.0	39000.0	Level	Aus ATC (ADS-B)
Sun 01:04:44 PM	-33.5615	123.7553	→ 99°	498.0	573.0	39000.0	Level	Aus ATC (ADS-B)
Sun 01:04:54 PM	-33.5649	123.7826	→ 98°	498.0	573.0	39000.0	Level	Aus ATC (ADS-B)
Sun 01:05:29 PM	-33.5768	123.878	→ 99°	499.0	574.0	39000.0	Level	Aus ATC (ADS-B)
Sun 01:05:39 PM	-33.5801	123.9053	→ 98°	499.0	574.0	39000.0	Level	Aus ATC (ADS-B)
Sun 01:05:49 PM	-33.5835	123.9327	→ 98°	499.0	574.0	39000.0	Level	Aus ATC (ADS-B)
Sun 01:06:04 PM	-33.5885	123.9735	→ 98°	499.0	574.0	39000.0	Level	Aus ATC (ADS-B)
Sun 01:06:14 PM	-33.5919	124.0007	→ 98°	499.0	574.0	39000.0	Level	Aus ATC (ADS-B)
Sun 01:06:19 PM	-33.5935	124.0144	→ 98°	499.0	574.0	39000.0	Level	Aus ATC (ADS-B)
Sun 01:06:24 PM	-33.5952	124.028	→ 98°	499.0	574.0	39000.0	Level	Aus ATC (ADS-B)
Sun 01:06:29 PM	-33.5969	124.0418	→ 98°	499.0	574.0	39000.0	Level	Aus ATC (ADS-B)
Sun 01:06:39 PM	-33.6002	124.0691	→ 98°	500.0	575.0	39000.0	Level	Aus ATC (ADS-B)
Sun 01:06:44 PM	-33.6018	124.0827	→ 98°	500.0	575.0	39000.0	Level	Aus ATC (ADS-B)
Sun 01:06:49 PM	-33.6035	124.0963	→ 99°	500.0	575.0	39000.0	Level	Aus ATC (ADS-B)
Sun 01:06:54 PM	-33.6052	124.11	→ 98°	500.0	575.0	39000.0	Level	Aus ATC (ADS-B)
Sun 01:06:59 PM	-33.6068	124.1236	→ 98°	500.0	575.0	39000.0	Level	Aus ATC (ADS-B)
Sun 01:07:09 PM	-33.6101	124.151	→ 98°	500.0	575.0	39000.0	Level	Aus ATC (ADS-B)
Sun 01:07:14 PM	-33.6118	124.1646	→ 99°	500.0	575.0	39000.0	Level	Aus ATC (ADS-B)
Sun 01:07:24 PM	-33.6151	124.1922	→ 98°	500.0	575.0	39000.0	Level	Aus ATC (ADS-B)
Sun 01:07:34 PM	-33.6184	124.2193	→ 98°	501.0	577.0	39000.0	Level	Aus ATC (ADS-B)
Sun 01:07:49 PM	-33.6233	124.2605	→ 98°	501.0	577.0	39000.0	Level	Aus ATC (ADS-B)
Sun 01:07:59 PM	-33.6267	124.288	→ 98°	501.0	577.0	39000.0	Level	Aus ATC (ADS-B)
Sun 01:08:04 PM	-33.6283	124.3015	→ 98°	501.0	577.0	39000.0	Level	Aus ATC (ADS-B)
Sun 01:08:09 PM	-33.6299	124.3152	→ 98°	501.0	577.0	39000.0	Level	Aus ATC (ADS-B)
Sun 01:08:14 PM	-33.6315	124.3289	→ 98°	501.0	577.0	39000.0	Level	Aus ATC (ADS-B)
Sun 01:08:24 PM	-33.6349	124.3565	→ 98°	500.0	575.0	39000.0	Level	Aus ATC (ADS-B)
Sun 01:08:29 PM	-33.6365	124.37	→ 98°	500.0	575.0	39000.0	Level	Aus ATC (ADS-B)
Sun 01:08:34 PM	-33.6381	124.3837	→ 98°	500.0	575.0	39000.0	Level	Aus ATC (ADS-B)
Sun 01:08:44 PM	-33.6414	124.4112	→ 98°	500.0	575.0	39000.0	Level	Aus ATC (ADS-B)
Sun 01:08:49 PM	-33.643	124.4247	→ 98°	500.0	575.0	39000.0	Level	Aus ATC (ADS-B)
Sun 01:08:53 PM	-33.6446	124.4384	→ 98°	500.0	575.0	39000.0	Level	Aus ATC (ADS-B)
Sun 01:08:58 PM	-33.6463	124.4521	→ 98°	500.0	575.0	39000.0	Level	Aus ATC (ADS-B)
Sun 01:09:08 PM	-33.6495	124.4795	→ 98°	500.0	575.0	39000.0	Level	Aus ATC (ADS-B)
Sun 01:09:23 PM	-33.6544	124.5206	→ 98°	500.0	575.0	39000.0	Level	Aus ATC (ADS-B)
Sun 01:09:33 PM	-33.6576	124.5479	→ 98°	500.0	575.0	39000.0	Level	Aus ATC (ADS-B)
Sun 01:09:43 PM	-33.6608	124.575	→ 98°	499.0	574.0	39000.0	Level	Aus ATC (ADS-B)
Sun 01:09:48 PM	-33.6624	124.5888	→ 98°	499.0	574.0	39000.0	Level	Aus ATC (ADS-B)
Sun 01:09:53 PM	-33.664	124.6025	→ 98°	499.0	574.0	39000.0	Level	Aus ATC (ADS-B)
Sun 01:10:53 PM	-33.6832	124.7665	→ 98°	500.0	575.0	39000.0	Level	Aus ATC (ADS-B)
Sun 01:11:08 PM	-33.6879	124.8074	→ 98°	499.0	574.0	39000.0	Level	Aus ATC (ADS-B)
Sun 01:11:18 PM	-33.6911	124.8348	→ 98°	499.0	574.0	39000.0	Level	Aus ATC (ADS-B)
Sun 01:11:23 PM	-33.6926	124.8485	→ 98°	499.0	574.0	39000.0	Level	Aus ATC (ADS-B)
Sun 01:11:28 PM	-33.6942	124.8622	→ 98°	499.0	574.0	39000.0	Level	Aus ATC (ADS-B)
Sun 01:11:33 PM	-33.6957	124.8756	→ 98°	499.0	574.0	39000.0	Level	Aus ATC (ADS-B)
Sun 01:11:43 PM	-33.6989	124.9031	→ 98°	499.0	574.0	39000.0	Level	Aus ATC (ADS-B)
Sun 01:11:48 PM	-33.7005	124.9167	→ 98°	499.0	574.0	39000.0	Level	Aus ATC (ADS-B)
Sun 01:11:53 PM	-33.7021	124.9303	→ 98°	499.0	574.0	39000.0	Level	Aus ATC (ADS-B)
Sun 01:11:58 PM	-33.7036	124.9441	→ 97°	499.0	574.0	39000.0	Level	Aus ATC (ADS-B)
Sun 01:12:03 PM	-33.7052	124.9576	→ 98°	499.0	574.0	39000.0	Level	Aus ATC (ADS-B)
Sun 01:12:13 PM	-33.7084	124.9849	→ 98°	498.0	573.0	39000.0	Level	Aus ATC (ADS-B)
Sun 01:12:18 PM	-33.7101	124.9985	→ 99°	498.0	573.0	39000.0	Level	Aus ATC (ADS-B)
Sun 01:12:53 PM	-33.7233	125.0933	→ 99°	497.0	572.0	39000.0	Level	Aus ATC (ADS-B)
Sun 01:13:03 PM	-33.7274	125.1206	→ 100°	497.0	572.0	39000.0	Level	Aus ATC (ADS-B)
Sun 01:13:13 PM	-33.7314	125.1473	→ 100°	496.0	571.0	39000.0	Level	Aus ATC (ADS-B)
Sun 01:13:18 PM	-33.7335	125.161	→ 100°	497.0	572.0	39000.0	Level	Aus ATC (ADS-B)
Sun 01:13:28 PM	-33.7375	125.188	→ 100°	497.0	572.0	39000.0	Level	Aus ATC (ADS-B)
Sun 01:13:33 PM	-33.7396	125.2015	→ 100°	497.0	572.0	39000.0	Level	Aus ATC (ADS-B)
Sun 01:13:38 PM	-33.7416	125.215	→ 100°	497.0	572.0	39000.0	Level	Aus ATC (ADS-B)
Sun 01:13:48 PM	-33.7457	125.2422	→ 100°	498.0	573.0	39000.0	Level	Aus ATC (ADS-B)
Sun 01:14:03 PM	-33.7517	125.2827	→ 100°	498.0	573.0	39000.0	Level	Aus ATC (ADS-B)
Sun 01:14:13 PM	-33.7558	125.31	→ 100°	497.0	572.0	39000.0	Level	Aus ATC (ADS-B)
Sun 01:14:53 PM	-33.7716	125.4185	→ 100°	498.0	573.0	39000.0	Level	Aus ATC (ADS-B)
Sun 01:14:58 PM	-33.7735	125.432	→ 99°	498.0	573.0	39000.0	Level	Aus ATC (ADS-B)
Sun 01:15:08 PM	-33.7774	125.4593	→ 100°	498.0	573.0	39000.0	Level	Aus ATC (ADS-B)
Sun 01:15:13 PM	-33.7794	125.4731	→ 100°	498.0	573.0	39000.0	Level	Aus ATC (ADS-B)
Sun 01:15:18 PM	-33.7814	125.4865	→ 100°	498.0	573.0	39000.0	Level	Aus ATC (ADS-B)
Sun 01:15:23 PM	-33.7834	125.5002	→ 99°	498.0	573.0	39000.0	Level	Aus ATC (ADS-B)
Sun 01:15:33 PM	-33.7872	125.5273	→ 100°	498.0	573.0	39000.0	Level	Aus ATC (ADS-B)
Sun 01:15:38 PM	-33.7892	125.5409	→ 100°	498.0	573.0	39000.0	Level	Aus ATC (ADS-B)
Sun 01:15:48 PM	-33.7931	125.5681	→ 100°	498.0	573.0	39000.0	Level	Aus ATC (ADS-B)
Sun 01:15:58 PM	-33.7969	125.5954	→ 100°	498.0	573.0	39000.0	Level	Aus ATC (ADS-B)
Sun 01:16:13 PM	-33.8028	125.6362	→ 100°	498.0	573.0	39000.0	Level	Aus ATC (ADS-B)
Sun 01:16:23 PM	-33.8066	125.6632	→ 100°	498.0	573.0	39000.0	Level	Aus ATC (ADS-B)
Sun 01:16:28 PM	-33.8086	125.6769	→ 100°	498.0	573.0	39000.0	Level	Aus ATC (ADS-B)
Sun 01:16:33 PM	-33.8105	125.6904	→ 100°	498.0	573.0	39000.0	Level	Aus ATC (ADS-B)
Sun 01:16:38 PM	-33.8124	125.704	→ 99°	498.0	573.0	39000.0	Level	Aus ATC (ADS-B)
Sun 01:16:48 PM	-33.8163	125.7312	→ 100°	498.0	573.0	39000.0	Level	Aus ATC (ADS-B)
Sun 01:16:53 PM	-33.8182	125.7449	→ 99°	498.0	573.0	39000.0	Level	Aus ATC (ADS-B)
Sun 01:16:58 PM	-33.8202	125.7585	→ 100°	498.0	573.0	39000.0	Level	Aus ATC (ADS-B)
Sun 01:17:08 PM	-33.824	125.7857	→ 100°	497.0	572.0	39000.0	Level	Aus ATC (ADS-B)
Sun 01:17:13 PM	-33.8259	125.7991	→ 100°	497.0	572.0	39000.0	Level	Aus ATC (ADS-B)
Sun 01:17:48 PM	-33.8393	125.8942	→ 100°	497.0	572.0	39000.0	Level	Aus ATC (ADS-B)
Sun 01:17:58 PM	-33.8431	125.9213	→ 99°	497.0	572.0	39000.0	Level	Aus ATC (ADS-B)
Sun 01:18:08 PM	-33.8469	125.9485	→ 99°	497.0	572.0	39000.0	Level	Aus ATC (ADS-B)
Sun 01:18:13 PM	-33.8488	125.9621	→ 100°	497.0	572.0	39000.0	Level	Aus ATC (ADS-B)
Sun 01:18:23 PM	-33.8526	125.9892	→ 100°	497.0	572.0	39000.0	Level	Aus ATC (ADS-B)
Sun 01:18:28 PM	-33.8545	126.0027	→ 99°	497.0	572.0	39000.0	Level	Aus ATC (ADS-B)
Sun 01:18:33 PM	-33.8564	126.0163	→ 100°	497.0	572.0	39000.0	Level	Aus ATC (ADS-B)
Sun 01:18:38 PM	-33.8583	126.0297	→ 99°	497.0	572.0	39000.0	Level	Aus ATC (ADS-B)
Sun 01:18:43 PM	-33.8602	126.0434	→ 100°	497.0	572.0	39000.0	Level	Aus ATC (ADS-B)
Sun 01:18:53 PM	-33.864	126.0705	→ 99°	498.0	573.0	39000.0	Level	Aus ATC (ADS-B)
Sun 01:18:58 PM	-33.8659	126.0841	→ 100°	498.0	573.0	39000.0	Level	Aus ATC (ADS-B)
Sun 01:19:08 PM	-33.8696	126.1113	→ 99°	498.0	573.0	39000.0	Level	Aus ATC (ADS-B)
Sun 01:19:17 PM	-33.8734	126.1385	→ 100°	499.0	574.0	39000.0	Level	Aus ATC (ADS-B)
Sun 01:19:32 PM	-33.8791	126.1795	→ 100°	499.0	574.0	39000.0	Level	Aus ATC (ADS-B)
Sun 01:19:42 PM	-33.8829	126.2068	→ 99°	500.0	575.0	39000.0	Level	Aus ATC (ADS-B)
Sun 01:19:53 PM	-33.8866	126.234	→ 99°	500.0	575.0	39000.0	Level	Aus ATC (ADS-B)
Sun 01:19:57 PM	-33.8885	126.2478	→ 99°	500.0	575.0	39000.0	Level	Aus ATC (ADS-B)
Sun 01:20:07 PM	-33.8923	126.275	→ 100°	500.0	575.0	39000.0	Level	Aus ATC (ADS-B)
Sun 01:20:12 PM	-33.8942	126.2888	→ 99°	500.0	575.0	39000.0	Level	Aus ATC (ADS-B)
Sun 01:20:17 PM	-33.896	126.3024	→ 99°	500.0	575.0	39000.0	Level	Aus ATC (ADS-B)
Sun 01:20:22 PM	-33.8979	126.3161	→ 99°	500.0	575.0	39000.0	Level	Aus ATC (ADS-B)
Sun 01:20:27 PM	-33.8998	126.3297	→ 99°	500.0	575.0	39000.0	Level	Aus ATC (ADS-B)
Sun 01:20:37 PM	-33.9035	126.3569	→ 99°	499.0	574.0	39000.0	Level	Aus ATC (ADS-B)
Sun 01:20:42 PM	-33.9054	126.3708	→ 99°	500.0	575.0	39000.0	Level	Aus ATC (ADS-B)
Sun 01:20:52 PM	-33.9091	126.398	→ 99°	499.0	574.0	39000.0	Level	Aus ATC (ADS-B)
Sun 01:21:02 PM	-33.9128	126.4252	→ 99°	499.0	574.0	39000.0	Level	Aus ATC (ADS-B)
Sun 01:21:17 PM	-33.9184	126.4663	→ 99°	499.0	574.0	39000.0	Level	Aus ATC (ADS-B)
Sun 01:21:27 PM	-33.922	126.4934	→ 99°	499.0	574.0	39000.0	Level	Aus ATC (ADS-B)
Sun 01:21:32 PM	-33.9239	126.5072	→ 99°	499.0	574.0	39000.0	Level	Aus ATC (ADS-B)
Sun 01:21:37 PM	-33.9258	126.5207	→ 99°	499.0	574.0	39000.0	Level	Aus ATC (ADS-B)
Sun 01:21:42 PM	-33.9276	126.5345	→ 99°	499.0	574.0	39000.0	Level	Aus ATC (ADS-B)
Sun 01:21:52 PM	-33.9313	126.5618	→ 99°	499.0	574.0	39000.0	Level	Aus ATC (ADS-B)
Sun 01:21:57 PM	-33.9331	126.5753	→ 99°	499.0	574.0	39000.0	Level	Aus ATC (ADS-B)
Sun 01:22:02 PM	-33.9349	126.5889	→ 99°	498.0	573.0	39000.0	Level	Aus ATC (ADS-B)
Sun 01:22:12 PM	-33.9387	126.6163	→ 99°	499.0	574.0	39000.0	Level	Aus ATC (ADS-B)
Sun 01:22:52 PM	-33.9533	126.7253	→ 99°	499.0	574.0	39000.0	Level	Aus ATC (ADS-B)
Sun 01:23:02 PM	-33.9569	126.7527	→ 99°	499.0	574.0	39000.0	Level	Aus ATC (ADS-B)
Sun 01:23:12 PM	-33.9606	126.78	→ 99°	499.0	574.0	39000.0	Level	Aus ATC (ADS-B)
Sun 01:23:17 PM	-33.9624	126.7936	→ 99°	499.0	574.0	39000.0	Level	Aus ATC (ADS-B)
Sun 01:23:27 PM	-33.966	126.821	→ 99°	499.0	574.0	39000.0	Level	Aus ATC (ADS-B)
Sun 01:23:32 PM	-33.9679	126.8345	→ 99°	499.0	574.0	39000.0	Level	Aus ATC (ADS-B)
Sun 01:23:37 PM	-33.9696	126.8483	→ 99°	499.0	574.0	39000.0	Level	Aus ATC (ADS-B)
Sun 01:23:42 PM	-33.9715	126.8619	→ 99°	499.0	574.0	39000.0	Level	Aus ATC (ADS-B)
Sun 01:23:47 PM	-33.9733	126.8755	→ 99°	499.0	574.0	39000.0	Level	Aus ATC (ADS-B)
Sun 01:23:57 PM	-33.9769	126.9029	→ 99°	499.0	574.0	39000.0	Level	Aus ATC (ADS-B)
Sun 01:24:02 PM	-33.9787	126.9166	→ 99°	499.0	574.0	39000.0	Level	Aus ATC (ADS-B)
Sun 01:24:12 PM	-33.9823	126.9441	→ 99°	499.0	574.0	39000.0	Level	Aus ATC (ADS-B)
Sun 01:24:22 PM	-33.9859	126.9712	→ 99°	499.0	574.0	39000.0	Level	Aus ATC (ADS-B)
Sun 01:24:37 PM	-33.9913	127.0124	→ 99°	499.0	574.0	39000.0	Level	Aus ATC (ADS-B)
Sun 01:24:47 PM	-33.9949	127.0397	→ 99°	498.0	573.0	39000.0	Level	Aus ATC (ADS-B)
Sun 01:24:52 PM	-33.9966	127.0533	→ 99°	498.0	573.0	39000.0	Level	Aus ATC (ADS-B)
Sun 01:24:57 PM	-33.9984	127.0669	→ 99°	498.0	573.0	39000.0	Level	Aus ATC (ADS-B)
Sun 01:25:02 PM	-34.0002	127.0806	→ 99°	498.0	573.0	39000.0	Level	Aus ATC (ADS-B)
Sun 01:25:12 PM	-34.0038	127.1081	→ 99°	498.0	573.0	39000.0	Level	Aus ATC (ADS-B)
Sun 01:25:17 PM	-34.0056	127.1217	→ 99°	498.0	573.0	39000.0	Level	Aus ATC (ADS-B)
Sun 01:25:22 PM	-34.0074	127.1352	→ 99°	498.0	573.0	39000.0	Level	Aus ATC (ADS-B)
Sun 01:25:32 PM	-34.0109	127.1626	→ 99°	498.0	573.0	39000.0	Level	Aus ATC (ADS-B)
Sun 01:25:42 PM	-34.0144	127.1899	→ 99°	498.0	573.0	39000.0	Level	Aus ATC (ADS-B)
Sun 01:25:47 PM	-34.0162	127.2035	→ 99°	498.0	573.0	39000.0	Level	Aus ATC (ADS-B)
Sun 01:25:57 PM	-34.0197	127.2308	→ 99°	498.0	573.0	39000.0	Level	Aus ATC (ADS-B)
Sun 01:26:07 PM	-34.0233	127.2581	→ 99°	498.0	573.0	39000.0	Level	Aus ATC (ADS-B)
Sun 01:26:12 PM	-34.025	127.2717	→ 99°	498.0	573.0	39000.0	Level	Aus ATC (ADS-B)
Sun 01:26:22 PM	-34.0285	127.2989	→ 99°	497.0	572.0	39000.0	Level	Aus ATC (ADS-B)
Sun 01:26:32 PM	-34.032	127.3262	→ 99°	498.0	573.0	39000.0	Level	Aus ATC (ADS-B)
Sun 01:26:37 PM	-34.0338	127.34	→ 99°	498.0	573.0	39000.0	Level	Aus ATC (ADS-B)
Sun 01:26:47 PM	-34.0373	127.3672	→ 99°	498.0	573.0	39000.0	Level	Aus ATC (ADS-B)
Sun 01:26:52 PM	-34.0391	127.381	→ 99°	498.0	573.0	39000.0	Level	Aus ATC (ADS-B)
Sun 01:26:57 PM	-34.0408	127.3945	→ 99°	498.0	573.0	39000.0	Level	Aus ATC (ADS-B)
Sun 01:27:02 PM	-34.0426	127.4083	→ 98°	498.0	573.0	39000.0	Level	Aus ATC (ADS-B)
Sun 01:27:07 PM	-34.0443	127.4218	→ 98°	498.0	573.0	39000.0	Level	Aus ATC (ADS-B)
Sun 01:27:47 PM	-34.0582	127.531	→ 99°	498.0	573.0	39000.0	Level	Aus ATC (ADS-B)
Sun 01:27:57 PM	-34.0616	127.5583	→ 99°	497.0	572.0	39000.0	Level	Aus ATC (ADS-B)
Sun 01:28:07 PM	-34.065	127.5856	→ 99°	497.0	572.0	39000.0	Level	Aus ATC (ADS-B)
Sun 01:28:12 PM	-34.0668	127.5993	→ 99°	497.0	572.0	39000.0	Level	Aus ATC (ADS-B)
Sun 01:28:22 PM	-34.0702	127.6266	→ 99°	497.0	572.0	39000.0	Level	Aus ATC (ADS-B)
Sun 01:28:27 PM	-34.072	127.6404	→ 99°	497.0	572.0	39000.0	Level	Aus ATC (ADS-B)
Sun 01:29:07 PM	-34.0856	127.7494	→ 99°	497.0	572.0	39000.0	Level	Aus ATC (ADS-B)
Sun 01:29:17 PM	-34.089	127.7767	→ 98°	495.0	570.0	39000.0	Level	Aus ATC (ADS-B)
Sun 01:29:32 PM	-34.0941	127.8176	→ 99°	495.0	570.0	39000.0	Level	Aus ATC (ADS-B)
Sun 01:29:41 PM	-34.0975	127.8449	→ 99°	494.0	568.0	39000.0	Level	Aus ATC (ADS-B)
Sun 01:29:46 PM	-34.0992	127.8582	→ 99°	494.0	568.0	39000.0	Level	Aus ATC (ADS-B)
Sun 01:29:52 PM	-34.1008	127.8718	→ 98°	494.0	568.0	39000.0	Level	Aus ATC (ADS-B)
Sun 01:29:56 PM	-34.1025	127.8855	→ 99°	494.0	568.0	39000.0	Level	Aus ATC (ADS-B)
Sun 01:30:06 PM	-34.1059	127.9127	→ 98°	494.0	568.0	39000.0	Level	Aus ATC (ADS-B)
Sun 01:30:12 PM	-34.1076	127.9263	→ 99°	494.0	568.0	39000.0	Level	Aus ATC (ADS-B)
Sun 01:30:16 PM	-34.1093	127.9398	→ 98°	494.0	568.0	39000.0	Level	Aus ATC (ADS-B)
Sun 01:30:26 PM	-34.1127	127.9672	→ 98°	494.0	568.0	39000.0	Level	Aus ATC (ADS-B)
Sun 01:30:36 PM	-34.116	127.9944	→ 98°	494.0	568.0	39000.0	Level	Aus ATC (ADS-B)
Sun 01:31:16 PM	-34.1293	128.1029	→ 98°	494.0	568.0	39000.0	Level	Aus ATC (ADS-B)
Sun 01:31:26 PM	-34.1326	128.1302	→ 98°	494.0	568.0	39000.0	Level	Aus ATC (ADS-B)
Sun 01:31:31 PM	-34.1343	128.1437	→ 99°	494.0	568.0	39000.0	Level	Aus ATC (ADS-B)
Sun 01:31:41 PM	-34.1376	128.1709	→ 98°	494.0	568.0	39000.0	Level	Aus ATC (ADS-B)
Sun 01:31:46 PM	-34.1392	128.1844	→ 98°	494.0	568.0	39000.0	Level	Aus ATC (ADS-B)
Sun 01:31:51 PM	-34.1409	128.1981	→ 98°	494.0	568.0	39000.0	Level	Aus ATC (ADS-B)
Sun 01:32:01 PM	-34.1442	128.2252	→ 98°	494.0	568.0	39000.0	Level	Aus ATC (ADS-B)
Sun 01:32:11 PM	-34.1475	128.2525	→ 98°	493.0	567.0	39000.0	Level	Aus ATC (ADS-B)
Sun 01:32:16 PM	-34.1491	128.2659	→ 98°	493.0	567.0	39000.0	Level	Aus ATC (ADS-B)
Sun 01:32:26 PM	-34.1524	128.2933	→ 98°	493.0	567.0	39000.0	Level	Aus ATC (ADS-B)
Sun 01:32:41 PM	-34.1572	128.3339	→ 98°	493.0	567.0	39000.0	Level	Aus ATC (ADS-B)
Sun 01:32:51 PM	-34.1605	128.3609	→ 98°	493.0	567.0	39000.0	Level	Aus ATC (ADS-B)
Sun 01:33:01 PM	-34.1638	128.3882	→ 98°	493.0	567.0	39000.0	Level	Aus ATC (ADS-B)
Sun 01:33:06 PM	-34.1654	128.4017	→ 98°	493.0	567.0	39000.0	Level	Aus ATC (ADS-B)
Sun 01:33:16 PM	-34.1686	128.4287	→ 98°	493.0	567.0	39000.0	Level	Aus ATC (ADS-B)
Sun 01:33:21 PM	-34.1702	128.4423	→ 99°	493.0	567.0	39000.0	Level	Aus ATC (ADS-B)
Sun 01:33:26 PM	-34.1719	128.4559	→ 98°	493.0	567.0	39000.0	Level	Aus ATC (ADS-B)
Sun 01:33:31 PM	-34.1735	128.4693	→ 98°	493.0	567.0	39000.0	Level	Aus ATC (ADS-B)
Sun 01:33:36 PM	-34.1751	128.4831	→ 98°	493.0	567.0	39000.0	Level	Aus ATC (ADS-B)
Sun 01:33:46 PM	-34.1783	128.5103	→ 98°	494.0	568.0	39000.0	Level	Aus ATC (ADS-B)
Sun 01:33:51 PM	-34.1799	128.5237	→ 98°	494.0	568.0	39000.0	Level	Aus ATC (ADS-B)
Sun 01:34:01 PM	-34.1832	128.5511	→ 98°	494.0	568.0	39000.0	Level	Aus ATC (ADS-B)
Sun 01:34:11 PM	-34.1863	128.578	→ 98°	494.0	568.0	39000.0	Level	Aus ATC (ADS-B)
Sun 01:34:26 PM	-34.1912	128.6189	→ 98°	494.0	568.0	39000.0	Level	Aus ATC (ADS-B)
Sun 01:34:36 PM	-34.1944	128.646	→ 98°	495.0	570.0	39000.0	Level	Aus ATC (ADS-B)
Sun 01:34:46 PM	-34.1976	128.6734	→ 98°	495.0	570.0	39000.0	Level	Aus ATC (ADS-B)
Sun 01:34:51 PM	-34.1992	128.6871	→ 98°	495.0	570.0	39000.0	Level	Aus ATC (ADS-B)
Sun 01:35:01 PM	-34.2023	128.7143	→ 98°	496.0	571.0	39000.0	Level	Aus ATC (ADS-B)
Sun 01:35:06 PM	-34.2039	128.728	→ 98°	496.0	571.0	39000.0	Level	Aus ATC (ADS-B)
Sun 01:35:11 PM	-34.2055	128.7417	→ 98°	496.0	571.0	39000.0	Level	Aus ATC (ADS-B)
Sun 01:35:16 PM	-34.2071	128.7553	→ 98°	496.0	571.0	39000.0	Level	Aus ATC (ADS-B)
Sun 01:35:21 PM	-34.2087	128.769	→ 98°	496.0	571.0	39000.0	Level	Aus ATC (ADS-B)
Sun 01:35:31 PM	-34.2118	128.7962	→ 98°	496.0	571.0	39000.0	Level	Aus ATC (ADS-B)
Sun 01:36:11 PM	-34.2245	128.9055	→ 98°	496.0	571.0	39000.0	Level	Aus ATC (ADS-B)
Sun 01:36:21 PM	-34.2276	128.9327	→ 98°	496.0	571.0	39000.0	Level	Aus ATC (ADS-B)
Sun 01:36:26 PM	-34.2292	128.9463	→ 98°	496.0	571.0	39000.0	Level	Aus ATC (ADS-B)
Sun 01:36:31 PM	-34.2308	128.96	→ 98°	496.0	571.0	39000.0	Level	Aus ATC (ADS-B)
Sun 01:36:36 PM	-34.2323	128.9736	→ 98°	496.0	571.0	39000.0	Level	Aus ATC (ADS-B)
Sun 01:36:46 PM	-34.2354	129.0011	→ 98°	497.0	572.0	39000.0	Level	Aus ATC (ADS-B)
Sun 01:36:51 PM	-34.237	129.0147	→ 98°	497.0	572.0	39000.0	Level	Aus ATC (ADS-B)
Sun 01:36:56 PM	-34.2386	129.0285	→ 98°	497.0	572.0	39000.0	Level	Aus ATC (ADS-B)
Sun 01:37:06 PM	-34.2417	129.0557	→ 98°	498.0	573.0	39000.0	Level	Aus ATC (ADS-B)
Sun 01:37:21 PM	-34.2464	129.097	→ 98°	497.0	572.0	39000.0	Level	Aus ATC (ADS-B)
Sun 01:37:31 PM	-34.2495	129.1242	→ 98°	497.0	572.0	39000.0	Level	Aus ATC (ADS-B)
Sun 01:37:41 PM	-34.2526	129.1518	→ 98°	497.0	572.0	39000.0	Level	Aus ATC (ADS-B)
Sun 01:37:46 PM	-34.2542	129.1656	→ 98°	497.0	572.0	39000.0	Level	Aus ATC (ADS-B)
Sun 01:37:56 PM	-34.2572	129.1927	→ 98°	497.0	572.0	39000.0	Level	Aus ATC (ADS-B)
Sun 01:38:06 PM	-34.2604	129.2202	→ 98°	497.0	572.0	39000.0	Level	Aus ATC (ADS-B)
Sun 01:38:11 PM	-34.2619	129.2341	→ 97°	497.0	572.0	39000.0	Level	Aus ATC (ADS-B)
Sun 01:38:16 PM	-34.2634	129.2477	→ 98°	497.0	572.0	39000.0	Level	Aus ATC (ADS-B)
Sun 01:38:21 PM	-34.265	129.2614	→ 98°	497.0	572.0	39000.0	Level	Aus ATC (ADS-B)
Sun 01:38:31 PM	-34.2681	129.2888	→ 98°	498.0	573.0	39000.0	Level	Aus ATC (ADS-B)
Sun 01:38:36 PM	-34.2696	129.3027	→ 98°	498.0	573.0	39000.0	Level	Aus ATC (ADS-B)
Sun 01:38:41 PM	-34.2711	129.3164	→ 98°	498.0	573.0	39000.0	Level	Aus ATC (ADS-B)
Sun 01:38:51 PM	-34.2742	129.3438	→ 98°	499.0	574.0	39000.0	Level	Aus ATC (ADS-B)
Sun 01:39:01 PM	-34.2773	129.3715	→ 98°	499.0	574.0	39000.0	Level	Aus ATC (ADS-B)
Sun 01:39:06 PM	-34.2788	129.3851	→ 98°	499.0	574.0	39000.0	Level	Aus ATC (ADS-B)
Sun 01:39:16 PM	-34.2819	129.4129	→ 98°	499.0	574.0	39000.0	Level	Aus ATC (ADS-B)
Sun 01:39:26 PM	-34.285	129.4404	→ 98°	499.0	574.0	39000.0	Level	Aus ATC (ADS-B)
Sun 01:39:31 PM	-34.2864	129.4541	→ 97°	499.0	574.0	39000.0	Level	Aus ATC (ADS-B)
Sun 01:39:40 PM	-34.2895	129.4815	→ 98°	499.0	574.0	39000.0	Level	Aus ATC (ADS-B)
Sun 01:39:51 PM	-34.2925	129.5092	→ 98°	499.0	574.0	39000.0	Level	Aus ATC (ADS-B)
Sun 01:39:56 PM	-34.2941	129.523	→ 98°	499.0	574.0	39000.0	Level	Aus ATC (ADS-B)
Sun 01:40:00 PM	-34.2956	129.5368	→ 97°	500.0	575.0	39000.0	Level	Aus ATC (ADS-B)
Sun 01:40:05 PM	-34.2971	129.5505	→ 98°	500.0	575.0	39000.0	Level	Aus ATC (ADS-B)
Sun 01:40:15 PM	-34.3001	129.5783	→ 98°	500.0	575.0	39000.0	Level	Aus ATC (ADS-B)
Sun 01:40:20 PM	-34.3016	129.5921	→ 97°	500.0	575.0	39000.0	Level	Aus ATC (ADS-B)
Sun 01:40:25 PM	-34.3031	129.6059	→ 98°	500.0	575.0	39000.0	Level	Aus ATC (ADS-B)
Sun 01:41:10 PM	-34.3167	129.7304	→ 98°	502.0	578.0	39000.0	Level	Aus ATC (ADS-B)
Sun 01:41:15 PM	-34.3182	129.7441	→ 97°	502.0	578.0	39000.0	Level	Aus ATC (ADS-B)
Sun 01:41:25 PM	-34.3212	129.7719	→ 97°	502.0	578.0	39000.0	Level	Aus ATC (ADS-B)
Sun 01:41:35 PM	-34.3242	129.7996	→ 97°	502.0	578.0	39000.0	Level	Aus ATC (ADS-B)
Sun 01:41:40 PM	-34.3257	129.8135	→ 98°	502.0	578.0	39000.0	Level	Aus ATC (ADS-B)
Sun 01:41:45 PM	-34.3271	129.8274	→ 97°	502.0	578.0	39000.0	Level	Aus ATC (ADS-B)
Sun 01:41:55 PM	-34.3301	129.8551	→ 97°	503.0	579.0	39000.0	Level	Aus ATC (ADS-B)
Sun 01:42:00 PM	-34.3316	129.869	→ 97°	503.0	579.0	39000.0	Level	Aus ATC (ADS-B)
Sun 01:42:05 PM	-34.3331	129.883	→ 97°	503.0	579.0	39000.0	Level	Aus ATC (ADS-B)
Sun 01:42:10 PM	-34.3346	129.8968	→ 97°	503.0	579.0	39000.0	Level	Aus ATC (ADS-B)
Sun 01:42:20 PM	-34.3375	129.9246	→ 97°	503.0	579.0	39000.0	Level	Aus ATC (ADS-B)
Sun 01:42:35 PM	-34.342	129.9662	→ 97°	503.0	579.0	39000.0	Level	Aus ATC (ADS-B)
Sun 01:42:45 PM	-34.3449	129.9942	→ 97°	503.0	579.0	39000.0	Level	Aus ATC (ADS-B)
Sun 01:42:55 PM	-34.3479	130.0218	→ 97°	503.0	579.0	39000.0	Level	Aus ATC (ADS-B)
Sun 01:43:00 PM	-34.3494	130.0357	→ 97°	503.0	579.0	39000.0	Level	Aus ATC (ADS-B)
Sun 01:43:10 PM	-34.3523	130.0635	→ 97°	503.0	579.0	39000.0	Level	Aus ATC (ADS-B)
Sun 01:43:20 PM	-34.3552	130.0915	→ 97°	503.0	579.0	39000.0	Level	Aus ATC (ADS-B)
Sun 01:43:25 PM	-34.3567	130.1053	→ 97°	504.0	580.0	39000.0	Level	Aus ATC (ADS-B)
Sun 01:43:30 PM	-34.3582	130.1191	→ 97°	504.0	580.0	39000.0	Level	Aus ATC (ADS-B)
Sun 01:43:35 PM	-34.3596	130.1333	→ 97°	504.0	580.0	39000.0	Level	Aus ATC (ADS-B)
Sun 01:43:45 PM	-34.3625	130.1612	→ 97°	505.0	581.0	39000.0	Level	Aus ATC (ADS-B)
Sun 01:43:50 PM	-34.364	130.175	→ 97°	505.0	581.0	39000.0	Level	Aus ATC (ADS-B)
Sun 01:43:55 PM	-34.3654	130.189	→ 97°	505.0	581.0	39000.0	Level	Aus ATC (ADS-B)
Sun 01:44:05 PM	-34.3683	130.217	→ 97°	506.0	582.0	39000.0	Level	Aus ATC (ADS-B)
Sun 01:44:15 PM	-34.3713	130.2449	→ 97°	506.0	582.0	39000.0	Level	Aus ATC (ADS-B)
Sun 01:44:30 PM	-34.3756	130.287	→ 97°	506.0	582.0	39000.0	Level	Aus ATC (ADS-B)
Sun 01:44:40 PM	-34.3785	130.3149	→ 97°	506.0	582.0	39000.0	Level	Aus ATC (ADS-B)
Sun 01:44:50 PM	-34.3814	130.3428	→ 97°	506.0	582.0	39000.0	Level	Aus ATC (ADS-B)
Sun 01:44:55 PM	-34.3828	130.3569	→ 97°	506.0	582.0	39000.0	Level	Aus ATC (ADS-B)
Sun 01:45:05 PM	-34.3857	130.3847	→ 97°	506.0	582.0	39000.0	Level	Aus ATC (ADS-B)
Sun 01:45:15 PM	-34.3886	130.4129	→ 97°	507.0	583.0	39000.0	Level	Aus ATC (ADS-B)
Sun 01:45:20 PM	-34.39	130.4267	→ 97°	507.0	583.0	39000.0	Level	Aus ATC (ADS-B)
Sun 01:45:25 PM	-34.3915	130.4408	→ 97°	507.0	583.0	39000.0	Level	Aus ATC (ADS-B)
Sun 01:46:25 PM	-34.4085	130.6094	→ 97°	508.0	585.0	39000.0	Level	Aus ATC (ADS-B)
Sun 01:46:35 PM	-34.4113	130.6375	→ 97°	508.0	585.0	39000.0	Level	Aus ATC (ADS-B)
Sun 01:46:40 PM	-34.4128	130.6515	→ 97°	508.0	585.0	39000.0	Level	Aus ATC (ADS-B)
Sun 01:46:50 PM	-34.4156	130.6798	→ 97°	509.0	586.0	39000.0	Level	Aus ATC (ADS-B)
Sun 01:47:00 PM	-34.4184	130.7079	→ 97°	510.0	587.0	39000.0	Level	Aus ATC (ADS-B)
Sun 01:47:05 PM	-34.4198	130.7222	→ 97°	510.0	587.0	39000.0	Level	Aus ATC (ADS-B)
Sun 01:47:10 PM	-34.4213	130.7363	→ 97°	511.0	588.0	39000.0	Level	Aus ATC (ADS-B)
Sun 01:47:20 PM	-34.4241	130.7646	→ 97°	512.0	589.0	39000.0	Level	Aus ATC (ADS-B)
Sun 01:47:25 PM	-34.4255	130.7785	→ 97°	512.0	589.0	39000.0	Level	Aus ATC (ADS-B)
Sun 01:47:30 PM	-34.4269	130.7928	→ 97°	513.0	590.0	39000.0	Level	Aus ATC (ADS-B)
Sun 01:47:35 PM	-34.4284	130.807	→ 97°	513.0	590.0	39000.0	Level	Aus ATC (ADS-B)
Sun 01:47:45 PM	-34.4312	130.8354	→ 97°	514.0	592.0	39000.0	Level	Aus ATC (ADS-B)
Sun 01:47:55 PM	-34.434	130.8637	→ 97°	514.0	592.0	39000.0	Level	Aus ATC (ADS-B)
Sun 01:48:00 PM	-34.4354	130.8781	→ 97°	514.0	592.0	39000.0	Level	Aus ATC (ADS-B)
Sun 01:48:10 PM	-34.4382	130.9066	→ 97°	515.0	593.0	39000.0	Level	Aus ATC (ADS-B)
Sun 01:48:20 PM	-34.441	130.935	→ 97°	515.0	593.0	39000.0	Level	Aus ATC (ADS-B)
Sun 01:48:25 PM	-34.4423	130.9493	→ 96°	514.0	592.0	39000.0	Level	Aus ATC (ADS-B)
Sun 01:48:35 PM	-34.4451	130.9777	→ 97°	515.0	593.0	39000.0	Level	Aus ATC (ADS-B)
Sun 01:48:45 PM	-34.4479	131.0064	→ 97°	515.0	593.0	39000.0	Level	Aus ATC (ADS-B)
Sun 01:48:50 PM	-34.4492	131.0204	→ 96°	515.0	593.0	39000.0	Level	Aus ATC (ADS-B)
Sun 01:48:55 PM	-34.4506	131.0347	→ 97°	515.0	593.0	39000.0	Level	Aus ATC (ADS-B)
Sun 01:49:00 PM	-34.452	131.049	→ 97°	515.0	593.0	39000.0	Level	Aus ATC (ADS-B)
Sun 01:49:10 PM	-34.4548	131.0777	→ 97°	515.0	593.0	39000.0	Level	Aus ATC (ADS-B)
Sun 01:49:15 PM	-34.4562	131.0918	→ 97°	515.0	593.0	39000.0	Level	Aus ATC (ADS-B)
Sun 01:49:20 PM	-34.4576	131.1063	→ 97°	515.0	593.0	39000.0	Level	Aus ATC (ADS-B)
Sun 01:49:30 PM	-34.4603	131.1349	→ 97°	515.0	593.0	39000.0	Level	Aus ATC (ADS-B)
Sun 01:49:40 PM	-34.463	131.1633	→ 97°	515.0	593.0	39000.0	Level	Aus ATC (ADS-B)
Sun 01:49:45 PM	-34.4644	131.1776	→ 97°	515.0	593.0	39000.0	Level	Aus ATC (ADS-B)
Sun 01:49:55 PM	-34.4672	131.2062	→ 97°	515.0	593.0	39000.0	Level	Aus ATC (ADS-B)
Sun 01:50:04 PM	-34.47	131.235	→ 97°	515.0	593.0	39000.0	Level	Aus ATC (ADS-B)
Sun 01:50:14 PM	-34.4727	131.2634	→ 97°	515.0	593.0	39000.0	Level	Aus ATC (ADS-B)
Sun 01:50:19 PM	-34.474	131.2777	→ 96°	515.0	593.0	39000.0	Level	Aus ATC (ADS-B)
Sun 01:50:29 PM	-34.4767	131.3064	→ 97°	515.0	593.0	39000.0	Level	Aus ATC (ADS-B)
Sun 01:51:04 PM	-34.4863	131.4063	→ 97°	515.0	593.0	39000.0	Level	Aus ATC (ADS-B)
Sun 01:51:09 PM	-34.4876	131.4207	→ 96°	515.0	593.0	39000.0	Level	Aus ATC (ADS-B)
Sun 01:51:14 PM	-34.489	131.435	→ 97°	515.0	593.0	39000.0	Level	Aus ATC (ADS-B)
Sun 01:51:24 PM	-34.4916	131.4637	→ 96°	515.0	593.0	39000.0	Level	Aus ATC (ADS-B)
Sun 01:51:34 PM	-34.4943	131.4921	→ 97°	515.0	593.0	39000.0	Level	Aus ATC (ADS-B)
Sun 01:52:14 PM	-34.505	131.6067	→ 96°	518.0	596.0	39000.0	Level	Aus ATC (ADS-B)
Sun 01:52:24 PM	-34.5076	131.6353	→ 96°	519.0	597.0	39000.0	Level	Aus ATC (ADS-B)
Sun 01:52:29 PM	-34.509	131.65	→ 96°	520.0	598.0	39000.0	Level	Aus ATC (ADS-B)
Sun 01:52:34 PM	-34.5103	131.6642	→ 96°	521.0	600.0	39000.0	Level	Aus ATC (ADS-B)
Sun 01:52:39 PM	-34.5116	131.6788	→ 96°	521.0	600.0	39000.0	Level	Aus ATC (ADS-B)
Sun 01:52:49 PM	-34.5143	131.7078	→ 96°	523.0	602.0	39000.0	Level	Aus ATC (ADS-B)
Sun 01:52:54 PM	-34.5156	131.7222	→ 96°	523.0	602.0	39000.0	Level	Aus ATC (ADS-B)
Sun 01:52:59 PM	-34.5169	131.7368	→ 96°	523.0	602.0	39000.0	Level	Aus ATC (ADS-B)
Sun 01:53:04 PM	-34.5183	131.7514	→ 97°	524.0	603.0	39000.0	Level	Aus ATC (ADS-B)
Sun 01:53:09 PM	-34.5196	131.766	→ 96°	524.0	603.0	39000.0	Level	Aus ATC (ADS-B)
Sun 01:53:19 PM	-34.5223	131.795	→ 96°	525.0	604.0	39000.0	Level	Aus ATC (ADS-B)
Sun 01:53:24 PM	-34.5236	131.8095	→ 96°	525.0	604.0	39000.0	Level	Aus ATC (ADS-B)
Sun 01:53:34 PM	-34.5263	131.8389	→ 96°	525.0	604.0	39000.0	Level	Aus ATC (ADS-B)
Sun 01:53:44 PM	-34.5289	131.8679	→ 96°	525.0	604.0	39000.0	Level	Aus ATC (ADS-B)
Sun 01:53:54 PM	-34.5315	131.8971	→ 96°	526.0	605.0	39000.0	Level	Aus ATC (ADS-B)
Sun 01:53:59 PM	-34.5328	131.9116	→ 96°	526.0	605.0	39000.0	Level	Aus ATC (ADS-B)
Sun 01:54:09 PM	-34.5355	131.9408	→ 97°	526.0	605.0	39000.0	Level	Aus ATC (ADS-B)
Sun 01:54:19 PM	-34.5381	131.97	→ 96°	526.0	605.0	39000.0	Level	Aus ATC (ADS-B)
Sun 01:54:24 PM	-34.5394	131.9845	→ 96°	526.0	605.0	39000.0	Level	Aus ATC (ADS-B)
Sun 01:54:29 PM	-34.5408	131.9993	→ 96°	526.0	605.0	39000.0	Level	Aus ATC (ADS-B)
Sun 01:54:34 PM	-34.5421	132.0139	→ 96°	526.0	605.0	39000.0	Level	Aus ATC (ADS-B)
Sun 01:54:44 PM	-34.5447	132.043	→ 96°	527.0	606.0	39000.0	Level	Aus ATC (ADS-B)
Sun 01:54:49 PM	-34.546	132.0576	→ 96°	527.0	606.0	39000.0	Level	Aus ATC (ADS-B)
Sun 01:54:54 PM	-34.5473	132.0724	→ 96°	527.0	606.0	39000.0	Level	Aus ATC (ADS-B)
Sun 01:55:04 PM	-34.5498	132.1015	→ 96°	528.0	608.0	39000.0	Level	Aus ATC (ADS-B)
Sun 01:55:14 PM	-34.5524	132.1308	→ 96°	528.0	608.0	39000.0	Level	Aus ATC (ADS-B)
Sun 01:55:19 PM	-34.5537	132.1456	→ 96°	528.0	608.0	39000.0	Level	Aus ATC (ADS-B)
Sun 01:55:29 PM	-34.5563	132.1748	→ 96°	528.0	608.0	39000.0	Level	Aus ATC (ADS-B)
Sun 01:55:39 PM	-34.5589	132.2043	→ 96°	528.0	608.0	39000.0	Level	Aus ATC (ADS-B)
Sun 01:55:54 PM	-34.5628	132.2482	→ 96°	529.0	609.0	39000.0	Level	Aus ATC (ADS-B)
Sun 01:56:04 PM	-34.5653	132.2777	→ 96°	529.0	609.0	39000.0	Level	Aus ATC (ADS-B)
Sun 01:56:09 PM	-34.5666	132.2923	→ 96°	528.0	608.0	39000.0	Level	Aus ATC (ADS-B)
Sun 01:56:14 PM	-34.5679	132.3069	→ 96°	528.0	608.0	39000.0	Level	Aus ATC (ADS-B)
Sun 01:56:19 PM	-34.5692	132.3215	→ 96°	528.0	608.0	39000.0	Level	Aus ATC (ADS-B)
Sun 01:56:29 PM	-34.5717	132.3508	→ 96°	528.0	608.0	39000.0	Level	Aus ATC (ADS-B)
Sun 01:57:09 PM	-34.5818	132.4684	→ 96°	529.0	609.0	39000.0	Level	Aus ATC (ADS-B)
Sun 01:57:14 PM	-34.5831	132.483	→ 96°	529.0	609.0	39000.0	Level	Aus ATC (ADS-B)
Sun 01:57:24 PM	-34.5855	132.5124	→ 96°	530.0	610.0	39000.0	Level	Aus ATC (ADS-B)
Sun 01:57:34 PM	-34.588	132.542	→ 96°	530.0	610.0	39000.0	Level	Aus ATC (ADS-B)
Sun 01:57:39 PM	-34.5893	132.5567	→ 96°	530.0	610.0	39000.0	Level	Aus ATC (ADS-B)
Sun 01:57:49 PM	-34.5918	132.5862	→ 96°	530.0	610.0	39000.0	Level	Aus ATC (ADS-B)
Sun 01:57:59 PM	-34.5942	132.6156	→ 96°	531.0	611.0	39000.0	Level	Aus ATC (ADS-B)
Sun 01:58:04 PM	-34.5955	132.6303	→ 96°	531.0	611.0	39000.0	Level	Aus ATC (ADS-B)
Sun 01:58:09 PM	-34.5967	132.6451	→ 96°	531.0	611.0	39000.0	Level	Aus ATC (ADS-B)
Sun 01:58:14 PM	-34.5979	132.6597	→ 96°	531.0	611.0	39000.0	Level	Aus ATC (ADS-B)
Sun 01:58:24 PM	-34.6004	132.6892	→ 96°	531.0	611.0	39000.0	Level	Aus ATC (ADS-B)
Sun 01:58:29 PM	-34.6017	132.7041	→ 96°	531.0	611.0	39000.0	Level	Aus ATC (ADS-B)
Sun 01:58:34 PM	-34.6029	132.7189	→ 96°	531.0	611.0	39000.0	Level	Aus ATC (ADS-B)
Sun 01:58:39 PM	-34.6041	132.7335	→ 96°	531.0	611.0	39000.0	Level	Aus ATC (ADS-B)
Sun 01:58:44 PM	-34.6054	132.7483	→ 96°	531.0	611.0	39000.0	Level	Aus ATC (ADS-B)
Sun 01:58:55 PM	-34.6078	132.7777	→ 96°	531.0	611.0	39000.0	Level	Aus ATC (ADS-B)
Sun 01:58:59 PM	-34.6091	132.7927	→ 96°	531.0	611.0	39000.0	Level	Aus ATC (ADS-B)
Sun 01:59:09 PM	-34.6115	132.822	→ 96°	531.0	611.0	39000.0	Level	Aus ATC (ADS-B)
Sun 01:59:19 PM	-34.614	132.8516	→ 96°	532.0	612.0	39000.0	Level	Aus ATC (ADS-B)
Sun 01:59:34 PM	-34.6177	132.8961	→ 96°	533.0	613.0	39000.0	Level	Aus ATC (ADS-B)
Sun 01:59:44 PM	-34.62	132.9258	→ 95°	533.0	613.0	39000.0	Level	Aus ATC (ADS-B)
Sun 01:59:54 PM	-34.6225	132.9555	→ 96°	533.0	613.0	39000.0	Level	Aus ATC (ADS-B)
Sun 01:59:59 PM	-34.6237	132.9703	→ 96°	535.0	616.0	39000.0	Level	Aus ATC (ADS-B)
Sun 02:00:09 PM	-34.6261	133.0002	→ 96°	535.0	616.0	39000.0	Level	Aus ATC (ADS-B)
Sun 02:00:13 PM	-34.6273	133.015	→ 96°	535.0	616.0	39000.0	Level	Aus ATC (ADS-B)
Sun 02:00:18 PM	-34.6285	133.0297	→ 96°	537.0	618.0	39000.0	Level	Aus ATC (ADS-B)
Sun 02:00:23 PM	-34.6297	133.0449	→ 96°	537.0	618.0	39000.0	Level	Aus ATC (ADS-B)
Sun 02:00:28 PM	-34.6309	133.0597	→ 96°	537.0	618.0	39000.0	Level	Aus ATC (ADS-B)
Sun 02:00:38 PM	-34.6333	133.0896	→ 96°	537.0	618.0	39000.0	Level	Aus ATC (ADS-B)
Sun 02:00:48 PM	-34.6357	133.1196	→ 96°	539.0	620.0	39000.0	Level	Aus ATC (ADS-B)
Sun 02:00:53 PM	-34.6369	133.1344	→ 96°	539.0	620.0	39000.0	Level	Aus ATC (ADS-B)
Sun 02:01:03 PM	-34.6393	133.1645	→ 95°	539.0	620.0	39000.0	Level	Aus ATC (ADS-B)
Sun 02:01:13 PM	-34.6417	133.1944	→ 96°	539.0	620.0	39000.0	Level	Aus ATC (ADS-B)
Sun 02:01:28 PM	-34.6453	133.2394	→ 95°	539.0	620.0	39000.0	-60 Descending	Aus ATC (ADS-B)
Sun 02:01:38 PM	-34.6476	133.2691	→ 95°	539.0	620.0	38975.0	Level	FlightAware ADS-B (PAL / YPPF)
Sun 02:02:03 PM	-34.6535	133.3446	→ 95°	540.0	621.0	39000.0	43 Climbing	Aus ATC (ADS-B)
Sun 02:02:13 PM	-34.6559	133.3749	→ 96°	541.0	623.0	39000.0	Level	Aus ATC (ADS-B)
Sun 02:02:18 PM	-34.6571	133.3898	→ 95°	541.0	623.0	39000.0	Level	Aus ATC (ADS-B)
Sun 02:02:23 PM	-34.6583	133.405	→ 95°	543.0	625.0	39000.0	Level	Aus ATC (ADS-B)
Sun 02:02:33 PM	-34.6606	133.4352	→ 95°	543.0	625.0	39000.0	Level	Aus ATC (ADS-B)
Sun 02:02:43 PM	-34.6629	133.4652	→ 95°	543.0	625.0	39000.0	Level	Aus ATC (ADS-B)
Sun 02:02:48 PM	-34.6641	133.4806	→ 96°	543.0	625.0	39000.0	Level	Aus ATC (ADS-B)
Sun 02:02:53 PM	-34.6653	133.4951	→ 95°	544.0	626.0	39000.0	Level	FlightAware ADS-B (YPED)
Sun 02:03:23 PM	-34.6723	133.5866	→ 95°	544.0	626.0	39000.0	-44 Descending	Aus ATC (ADS-B)
Sun 02:03:27 PM	-34.6732	133.5992	→ 95°	544.0	626.0	38975.0	Level	FlightAware ADS-B (YPED)
Sun 02:03:33 PM	-34.6745	133.6168	→ 95°	544.0	626.0	39000.0	136 Climbing	Aus ATC (ADS-B)
Sun 02:03:38 PM	-34.6757	133.6321	→ 95°	544.0	626.0	39000.0	Level	Aus ATC (ADS-B)
Sun 02:03:43 PM	-34.6768	133.6471	→ 95°	544.0	626.0	39000.0	Level	Aus ATC (ADS-B)
Sun 02:03:48 PM	-34.6779	133.6623	→ 95°	545.0	627.0	39000.0	Level	Aus ATC (ADS-B)
Sun 02:03:58 PM	-34.6802	133.6926	→ 95°	545.0	627.0	39000.0	Level	Aus ATC (ADS-B)
Sun 02:04:03 PM	-34.6814	133.7081	→ 96°	545.0	627.0	39000.0	Level	Aus ATC (ADS-B)
Sun 02:04:08 PM	-34.6825	133.7232	→ 95°	545.0	627.0	39000.0	Level	Aus ATC (ADS-B)
Sun 02:04:13 PM	-34.6837	133.7384	→ 95°	545.0	627.0	39000.0	Level	Aus ATC (ADS-B)
Sun 02:04:18 PM	-34.6848	133.7535	→ 95°	545.0	627.0	39000.0	Level	Aus ATC (ADS-B)
Sun 02:04:28 PM	-34.6871	133.7838	→ 95°	545.0	627.0	39000.0	Level	Aus ATC (ADS-B)
Sun 02:04:38 PM	-34.6893	133.8141	→ 95°	545.0	627.0	39000.0	Level	Aus ATC (ADS-B)
Sun 02:04:43 PM	-34.6905	133.8294	→ 95°	545.0	627.0	39000.0	Level	Aus ATC (ADS-B)
Sun 02:04:53 PM	-34.6928	133.8599	→ 95°	545.0	627.0	39000.0	-107 Descending	Aus ATC (ADS-B)
Sun 02:04:57 PM	-34.6937	133.8726	→ 95°	545.0	627.0	38975.0	Level	FlightAware ADS-B (YPED)
Sun 02:05:03 PM	-34.695	133.8903	→ 95°	545.0	627.0	39000.0	136 Climbing	Aus ATC (ADS-B)
Sun 02:05:08 PM	-34.6961	133.9052	→ 95°	545.0	627.0	39000.0	Level	Aus ATC (ADS-B)
Sun 02:05:18 PM	-34.6984	133.9357	→ 95°	545.0	627.0	39000.0	Level	Aus ATC (ADS-B)
Sun 02:05:28 PM	-34.7006	133.966	→ 95°	545.0	627.0	39000.0	Level	Aus ATC (ADS-B)
Sun 02:05:33 PM	-34.7017	133.9813	→ 95°	545.0	627.0	39000.0	Level	Aus ATC (ADS-B)
Sun 02:05:38 PM	-34.7028	133.9963	→ 95°	545.0	627.0	39000.0	Level	Aus ATC (ADS-B)
Sun 02:05:43 PM	-34.7039	134.0118	→ 95°	545.0	627.0	39000.0	Level	Aus ATC (ADS-B)
Sun 02:05:53 PM	-34.7061	134.042	→ 95°	546.0	628.0	39000.0	Level	Aus ATC (ADS-B)
Sun 02:05:58 PM	-34.7072	134.0573	→ 95°	546.0	628.0	39000.0	Level	Aus ATC (ADS-B)
Sun 02:06:03 PM	-34.7083	134.0726	→ 95°	546.0	628.0	39000.0	Level	Aus ATC (ADS-B)
Sun 02:06:08 PM	-34.7094	134.0877	→ 95°	546.0	628.0	39000.0	Level	Aus ATC (ADS-B)
Sun 02:06:13 PM	-34.7105	134.103	→ 95°	546.0	628.0	39000.0	Level	Aus ATC (ADS-B)
Sun 02:06:23 PM	-34.7127	134.1334	→ 95°	547.0	629.0	39000.0	Level	Aus ATC (ADS-B)
Sun 02:06:28 PM	-34.7137	134.1467	→ 95°	547.0	629.0	39000.0	Level	FlightAware ADS-B (YPED)
Sun 02:06:33 PM	-34.7149	134.164	→ 95°	547.0	629.0	39000.0	Level	Aus ATC (ADS-B)
Sun 02:06:38 PM	-34.716	134.1792	→ 95°	547.0	629.0	39000.0	Level	Aus ATC (ADS-B)
Sun 02:06:48 PM	-34.7181	134.2096	→ 95°	547.0	629.0	39000.0	Level	Aus ATC (ADS-B)
Sun 02:06:58 PM	-34.7203	134.2402	→ 95°	547.0	629.0	39000.0	Level	Aus ATC (ADS-B)
Sun 02:07:13 PM	-34.7235	134.2858	→ 95°	547.0	629.0	39000.0	Level	Aus ATC (ADS-B)
Sun 02:07:23 PM	-34.7257	134.3164	→ 95°	547.0	629.0	39000.0	-100 Descending	Aus ATC (ADS-B)
Sun 02:07:28 PM	-34.727	134.3361	→ 95°	547.0	629.0	38975.0	Level	FlightAware ADS-B (PAL / YPPF)
Sun 02:07:33 PM	-34.7278	134.3468	→ 95°	547.0	629.0	39000.0	150 Climbing	Aus ATC (ADS-B)
Sun 02:07:38 PM	-34.7289	134.3622	→ 95°	547.0	629.0	39000.0	Level	Aus ATC (ADS-B)
Sun 02:07:58 PM	-34.7331	134.4236	→ 95°	548.0	631.0	39000.0	Level	FlightAware ADS-B (PLO / YPLC)
Sun 02:08:18 PM	-34.7373	134.4842	→ 95°	548.0	631.0	39000.0	Level	Aus ATC (ADS-B)
Sun 02:08:23 PM	-34.7383	134.4995	→ 95°	548.0	631.0	39000.0	Level	Aus ATC (ADS-B)
Sun 02:08:28 PM	-34.7394	134.5151	→ 95°	548.0	631.0	39000.0	Level	Aus ATC (ADS-B)
Sun 02:08:33 PM	-34.7405	134.5301	→ 95°	549.0	632.0	39000.0	Level	Aus ATC (ADS-B)
Sun 02:08:43 PM	-34.7425	134.5607	→ 95°	549.0	632.0	39000.0	Level	Aus ATC (ADS-B)
Sun 02:08:58 PM	-34.7457	134.6067	→ 95°	549.0	632.0	39000.0	-33 Descending	Aus ATC (ADS-B)
Sun 02:09:28 PM	-34.752	134.7006	→ 95°	548.0	631.0	38975.0	Level	FlightAware ADS-B (PLO / YPLC)
Sun 02:09:53 PM	-34.757	134.775	→ 95°	547.0	629.0	39000.0	50 Climbing	Aus ATC (ADS-B)
Sun 02:09:58 PM	-34.758	134.7902	→ 95°	546.0	628.0	39000.0	Level	Aus ATC (ADS-B)
Sun 02:10:03 PM	-34.759	134.8055	→ 95°	546.0	628.0	39000.0	Level	Aus ATC (ADS-B)
Sun 02:10:13 PM	-34.761	134.8358	→ 95°	546.0	628.0	39000.0	Level	Aus ATC (ADS-B)
Sun 02:10:18 PM	-34.762	134.8511	→ 95°	547.0	629.0	39000.0	Level	Aus ATC (ADS-B)
Sun 02:10:23 PM	-34.763	134.8665	→ 94°	546.0	628.0	39000.0	Level	Aus ATC (ADS-B)
Sun 02:10:28 PM	-34.764	134.8815	→ 95°	546.0	628.0	39000.0	Level	Aus ATC (ADS-B)
Sun 02:10:38 PM	-34.766	134.9122	→ 94°	546.0	628.0	39000.0	Level	Aus ATC (ADS-B)
Sun 02:10:47 PM	-34.768	134.9425	→ 94°	547.0	629.0	39000.0	-75 Descending	Aus ATC (ADS-B)
Sun 02:10:58 PM	-34.7699	134.9737	→ 94°	546.0	628.0	38975.0	-37 Descending	FlightAware ADS-B (YPED)
Sun 02:11:28 PM	-34.7794	135.065	→ 101°	547.0	629.0	38975.0	31 Climbing	FlightAware ADS-B (YPED)
Sun 02:11:47 PM	-34.7912	135.1238	→ 104°	548.0	631.0	39000.0	63 Climbing	Aus ATC (ADS-B)
Sun 02:11:52 PM	-34.7949	135.1386	→ 107°	548.0	631.0	39000.0	Level	Aus ATC (ADS-B)
Sun 02:11:56 PM	-34.7976	135.1484	→ 108°	547.0	629.0	39000.0	Level	FlightAware ADS-B (ADL / YPAD)
Sun 02:11:57 PM	-34.7989	135.1532	→ 106°	547.0	629.0	39000.0	Level	Aus ATC (ADS-B)
Sun 02:12:02 PM	-34.8031	135.1675	→ 109°	547.0	629.0	39000.0	Level	Aus ATC (ADS-B)
Sun 02:12:17 PM	-34.8163	135.2108	↘ 111°	546.0	628.0	39000.0	Level	Aus ATC (ADS-B)
Sun 02:12:22 PM	-34.8206	135.2251	→ 110°	547.0	629.0	39000.0	Level	Aus ATC (ADS-B)
Sun 02:12:27 PM	-34.8249	135.2394	→ 110°	547.0	629.0	39000.0	-250 Descending	Aus ATC (ADS-B)
Sun 02:12:28 PM	-34.8253	135.241	→ 110°	546.0	628.0	38975.0	Level	FlightAware ADS-B (YPED)
Sun 02:12:32 PM	-34.8292	135.2539	→ 110°	547.0	629.0	39000.0	107 Climbing	Aus ATC (ADS-B)
Sun 02:12:42 PM	-34.8378	135.2826	→ 110°	547.0	629.0	39000.0	Level	Aus ATC (ADS-B)
Sun 02:12:52 PM	-34.8464	135.3116	→ 110°	547.0	629.0	39000.0	Level	Aus ATC (ADS-B)
Sun 02:12:57 PM	-34.8508	135.3259	↘ 111°	547.0	629.0	39000.0	Level	Aus ATC (ADS-B)
Sun 02:12:58 PM	-34.8513	135.3279	→ 110°	546.0	628.0	39000.0	Level	FlightAware ADS-B (YPED)
Sun 02:13:07 PM	-34.8593	135.3547	→ 110°	547.0	629.0	39000.0	Level	Aus ATC (ADS-B)
Sun 02:13:17 PM	-34.8679	135.3834	→ 110°	545.0	627.0	39000.0	-71 Descending	Aus ATC (ADS-B)
Sun 02:13:28 PM	-34.8765	135.4124	→ 110°	545.0	627.0	38975.0	Level	FlightAware ADS-B (PUG / YPAG)
Sun 02:13:57 PM	-34.9021	135.4987	→ 110°	545.0	627.0	39000.0	50 Climbing	Aus ATC (ADS-B)
Sun 02:13:58 PM	-34.903	135.5014	→ 110°	546.0	628.0	39000.0	Level	FlightAware ADS-B (YPED)
Sun 02:14:02 PM	-34.9064	135.5128	→ 109°	546.0	628.0	39000.0	Level	Aus ATC (ADS-B)
Sun 02:14:12 PM	-34.9149	135.5418	→ 110°	546.0	628.0	39000.0	Level	Aus ATC (ADS-B)
Sun 02:14:17 PM	-34.9192	135.5562	→ 110°	546.0	628.0	39000.0	Level	Aus ATC (ADS-B)
Sun 02:14:22 PM	-34.9235	135.5707	→ 110°	546.0	628.0	39000.0	Level	Aus ATC (ADS-B)
Sun 02:14:27 PM	-34.9278	135.585	→ 110°	547.0	629.0	39000.0	Level	Aus ATC (ADS-B)
Sun 02:14:28 PM	-34.9287	135.588	→ 110°	547.0	629.0	39000.0	Level	FlightAware ADS-B (YPED)
Sun 02:14:37 PM	-34.9363	135.6138	→ 110°	547.0	629.0	39000.0	Level	Aus ATC (ADS-B)
Sun 02:14:47 PM	-34.945	135.6429	→ 110°	547.0	629.0	39000.0	Level	Aus ATC (ADS-B)
Sun 02:14:58 PM	-34.9547	135.6758	→ 110°	547.0	629.0	39000.0	Level	FlightAware ADS-B (YPED)
Sun 02:15:02 PM	-34.9578	135.6863	→ 110°	547.0	629.0	39000.0	Level	Aus ATC (ADS-B)
Sun 02:15:12 PM	-34.9663	135.7151	→ 110°	548.0	631.0	39000.0	Level	Aus ATC (ADS-B)
Sun 02:15:22 PM	-34.9749	135.7442	→ 110°	548.0	631.0	39000.0	Level	Aus ATC (ADS-B)
Sun 02:15:27 PM	-34.9792	135.7587	→ 110°	548.0	631.0	39000.0	-250 Descending	Aus ATC (ADS-B)
Sun 02:15:28 PM	-34.9801	135.7619	→ 110°	548.0	631.0	38975.0	Level	FlightAware ADS-B (YPED)
Sun 02:15:37 PM	-34.9878	135.7877	→ 110°	548.0	631.0	39000.0	79 Climbing	Aus ATC (ADS-B)
Sun 02:15:47 PM	-34.9963	135.8166	→ 110°	548.0	631.0	39000.0	Level	Aus ATC (ADS-B)
Sun 02:15:52 PM	-35.0005	135.8309	→ 110°	548.0	631.0	39000.0	Level	Aus ATC (ADS-B)
Sun 02:15:57 PM	-35.0047	135.8454	→ 110°	548.0	631.0	39000.0	-250 Descending	Aus ATC (ADS-B)
Sun 02:15:58 PM	-35.0057	135.8486	→ 110°	548.0	631.0	38975.0	Level	FlightAware ADS-B (YPED)
Sun 02:16:02 PM	-35.0091	135.86	↘ 111°	548.0	631.0	39000.0	Level	Aus ATC (ADS-B)
Sun 02:16:29 PM	-35.0323	135.9392	→ 110°	548.0	631.0	38975.0	Level	FlightAware ADS-B (YPED)
Sun 02:16:42 PM	-35.0431	135.976	→ 110°	549.0	632.0	39000.0	65 Climbing	Aus ATC (ADS-B)
Sun 02:16:52 PM	-35.0516	136.0052	→ 110°	549.0	632.0	39000.0	-88 Descending	Aus ATC (ADS-B)
Sun 02:16:59 PM	-35.0577	136.0259	→ 110°	548.0	631.0	38975.0	Level	FlightAware ADS-B (YPED)
Sun 02:17:07 PM	-35.0644	136.0486	→ 110°	549.0	632.0	39000.0	83 Climbing	Aus ATC (ADS-B)
Sun 02:17:17 PM	-35.0729	136.0777	→ 110°	549.0	632.0	39000.0	Level	Aus ATC (ADS-B)
Sun 02:17:27 PM	-35.0813	136.1067	→ 110°	548.0	631.0	39000.0	-125 Descending	Aus ATC (ADS-B)
Sun 02:17:29 PM	-35.0832	136.113	→ 109°	548.0	631.0	38975.0	Level	FlightAware ADS-B (YPED)
Sun 02:17:32 PM	-35.0856	136.1213	→ 109°	549.0	632.0	39000.0	115 Climbing	Aus ATC (ADS-B)
Sun 02:17:42 PM	-35.0941	136.1506	→ 109°	549.0	632.0	39000.0	Level	Aus ATC (ADS-B)
Sun 02:17:52 PM	-35.1025	136.1795	→ 110°	549.0	632.0	39000.0	Level	Aus ATC (ADS-B)
Sun 02:17:57 PM	-35.1068	136.1942	→ 110°	549.0	632.0	39000.0	Level	Aus ATC (ADS-B)
Sun 02:17:59 PM	-35.1084	136.1998	→ 109°	549.0	632.0	39000.0	Level	FlightAware ADS-B (YPED)
Sun 02:18:02 PM	-35.111	136.2086	→ 110°	548.0	631.0	39000.0	Level	Aus ATC (ADS-B)
Sun 02:18:12 PM	-35.1194	136.2376	→ 110°	548.0	631.0	39000.0	Level	Aus ATC (ADS-B)
Sun 02:18:17 PM	-35.1236	136.2521	→ 110°	548.0	631.0	39000.0	Level	Aus ATC (ADS-B)
Sun 02:18:22 PM	-35.1279	136.2669	→ 109°	548.0	631.0	39000.0	Level	Aus ATC (ADS-B)
Sun 02:18:27 PM	-35.1321	136.2814	→ 110°	549.0	632.0	39000.0	Level	Aus ATC (ADS-B)
Sun 02:18:30 PM	-35.133	136.2846	→ 109°	549.0	632.0	39000.0	Level	FlightAware ADS-B (PRM / LPPM)
Sun 02:18:37 PM	-35.1405	136.3104	→ 110°	549.0	632.0	39000.0	Level	Aus ATC (ADS-B)
Sun 02:18:47 PM	-35.149	136.3397	→ 109°	549.0	632.0	39000.0	Level	Aus ATC (ADS-B)
Sun 02:19:02 PM	-35.1614	136.3832	→ 109°	549.0	632.0	39000.0	Level	Aus ATC (ADS-B)
Sun 02:19:12 PM	-35.1698	136.4123	→ 109°	549.0	632.0	39000.0	Level	Aus ATC (ADS-B)
Sun 02:19:22 PM	-35.1782	136.4416	→ 109°	549.0	632.0	39000.0	-83 Descending	Aus ATC (ADS-B)
Sun 02:19:30 PM	-35.1737	136.4259	→ 109°	548.0	631.0	38975.0	Level	FlightAware ADS-B (PRM / LPPM)
Sun 02:19:37 PM	-35.1907	136.4853	→ 109°	548.0	631.0	39000.0	88 Climbing	Aus ATC (ADS-B)
Sun 02:19:47 PM	-35.199	136.5144	→ 109°	547.0	629.0	39000.0	Level	Aus ATC (ADS-B)
Sun 02:19:52 PM	-35.2032	136.5289	→ 109°	547.0	629.0	39000.0	Level	Aus ATC (ADS-B)
Sun 02:19:57 PM	-35.2074	136.5435	→ 109°	548.0	631.0	39000.0	Level	Aus ATC (ADS-B)
Sun 02:20:02 PM	-35.2116	136.5581	→ 110°	549.0	632.0	39000.0	Level	Aus ATC (ADS-B)
Sun 02:20:03 PM	-35.2136	136.565	→ 109°	549.0	632.0	39000.0	Level	FlightAware ADS-B (ADL / YPAD)
Sun 02:20:07 PM	-35.2158	136.5727	→ 109°	549.0	632.0	39000.0	Level	Aus ATC (ADS-B)
Sun 02:20:17 PM	-35.2241	136.6018	→ 109°	549.0	632.0	39000.0	Level	Aus ATC (ADS-B)
Sun 02:20:22 PM	-35.2283	136.6164	→ 110°	549.0	632.0	39000.0	Level	Aus ATC (ADS-B)
Sun 02:20:27 PM	-35.2324	136.6309	→ 109°	548.0	631.0	39000.0	Level	Aus ATC (ADS-B)
Sun 02:20:32 PM	-35.2366	136.6456	→ 109°	548.0	631.0	39000.0	Level	Aus ATC (ADS-B)
Sun 02:20:42 PM	-35.245	136.6747	→ 110°	547.0	629.0	39000.0	Level	Aus ATC (ADS-B)
Sun 02:20:44 PM	-35.2471	136.6821	→ 109°	547.0	629.0	39000.0	Level	FlightAware ADS-B (PAL / YPPF)
Sun 02:20:52 PM	-35.2532	136.7038	→ 109°	547.0	629.0	39000.0	Level	Aus ATC (ADS-B)
Sun 02:20:57 PM	-35.2574	136.7184	→ 110°	547.0	629.0	39000.0	-65 Descending	Aus ATC (ADS-B)
Sun 02:21:15 PM	-35.2728	136.7723	→ 109°	547.0	629.0	38975.0	Level	FlightAware ADS-B (PAL / YPPF)
Sun 02:21:41 PM	-35.2948	136.8495	→ 109°	547.0	629.0	39000.0	48 Climbing	Aus ATC (ADS-B)
Sun 02:21:46 PM	-35.2987	136.863	→ 109°	547.0	629.0	39000.0	Level	FlightAware ADS-B (YPED)
Sun 02:21:51 PM	-35.3031	136.8786	→ 109°	547.0	629.0	39000.0	Level	Aus ATC (ADS-B)
Sun 02:21:56 PM	-35.3072	136.8931	→ 110°	547.0	629.0	39000.0	Level	Aus ATC (ADS-B)
Sun 02:22:01 PM	-35.3113	136.9077	→ 109°	547.0	629.0	39000.0	Level	Aus ATC (ADS-B)
Sun 02:22:06 PM	-35.3155	136.9222	→ 110°	547.0	629.0	39000.0	Level	Aus ATC (ADS-B)
Sun 02:22:16 PM	-35.3237	136.9513	→ 109°	547.0	629.0	39000.0	-136 Descending	Aus ATC (ADS-B)
Sun 02:22:17 PM	-35.3243	136.9532	→ 109°	547.0	629.0	38975.0	Level	FlightAware ADS-B (PAL / YPPF)
Sun 02:22:21 PM	-35.3279	136.966	→ 109°	547.0	629.0	39000.0	167 Climbing	Aus ATC (ADS-B)
Sun 02:22:26 PM	-35.332	136.9807	→ 109°	548.0	631.0	39000.0	Level	Aus ATC (ADS-B)
Sun 02:22:31 PM	-35.3361	136.9951	→ 110°	548.0	631.0	39000.0	Level	Aus ATC (ADS-B)
Sun 02:22:36 PM	-35.3403	137.0099	→ 109°	548.0	631.0	39000.0	Level	Aus ATC (ADS-B)
Sun 02:22:46 PM	-35.3486	137.0392	→ 109°	549.0	632.0	39000.0	Level	Aus ATC (ADS-B)
Sun 02:22:48 PM	-35.3496	137.0429	→ 109°	549.0	632.0	39000.0	Level	FlightAware ADS-B (PAL / YPPF)
Sun 02:23:01 PM	-35.3609	137.083	→ 109°	548.0	631.0	39000.0	Level	Aus ATC (ADS-B)
Sun 02:23:11 PM	-35.3691	137.1121	→ 109°	548.0	631.0	39000.0	-88 Descending	Aus ATC (ADS-B)
Sun 02:23:18 PM	-35.3744	137.1308	→ 109°	548.0	631.0	38975.0	Level	FlightAware ADS-B (PAL / YPPF)
Sun 02:23:21 PM	-35.3773	137.1412	→ 109°	548.0	631.0	39000.0	50 Climbing	Aus ATC (ADS-B)
Sun 02:23:48 PM	-35.3987	137.2174	→ 109°	547.0	629.0	39000.0	Level	FlightAware ADS-B (PAL / YPPF)
Sun 02:23:56 PM	-35.406	137.2437	→ 109°	546.0	628.0	39000.0	Level	Aus ATC (ADS-B)
Sun 02:24:01 PM	-35.4101	137.2581	→ 110°	546.0	628.0	39000.0	Level	Aus ATC (ADS-B)
Sun 02:24:16 PM	-35.4223	137.3019	→ 109°	546.0	628.0	39000.0	Level	Aus ATC (ADS-B)
Sun 02:24:21 PM	-35.4264	137.3165	→ 109°	546.0	628.0	39000.0	Level	Aus ATC (ADS-B)
Sun 02:24:26 PM	-35.4304	137.3309	→ 110°	546.0	628.0	39000.0	Level	Aus ATC (ADS-B)
Sun 02:24:31 PM	-35.4346	137.3458	→ 109°	547.0	629.0	39000.0	-63 Descending	Aus ATC (ADS-B)
Sun 02:24:50 PM	-35.4491	137.3982	→ 109°	547.0	629.0	38975.0	Level	FlightAware ADS-B (PAL / YPPF)
Sun 02:25:06 PM	-35.463	137.448	→ 109°	547.0	629.0	39000.0	58 Climbing	Aus ATC (ADS-B)
Sun 02:25:16 PM	-35.4711	137.4772	→ 109°	548.0	631.0	39000.0	Level	Aus ATC (ADS-B)
Sun 02:25:20 PM	-35.474	137.4875	→ 109°	548.0	631.0	39000.0	Level	FlightAware ADS-B (PAL / YPPF)
Sun 02:25:26 PM	-35.4793	137.5067	→ 109°	548.0	631.0	39000.0	Level	Aus ATC (ADS-B)
Sun 02:25:31 PM	-35.4833	137.5213	→ 109°	548.0	631.0	39000.0	Level	Aus ATC (ADS-B)
Sun 02:25:41 PM	-35.4914	137.5505	→ 109°	548.0	631.0	39000.0	Level	Aus ATC (ADS-B)
Sun 02:25:51 PM	-35.4996	137.5801	→ 109°	548.0	631.0	39000.0	Level	Aus ATC (ADS-B)
Sun 02:25:56 PM	-35.5036	137.5945	→ 109°	548.0	631.0	39000.0	Level	Aus ATC (ADS-B)
Sun 02:26:01 PM	-35.5077	137.6093	→ 109°	548.0	631.0	39000.0	Level	Aus ATC (ADS-B)
Sun 02:26:06 PM	-35.5117	137.6238	→ 108°	548.0	631.0	39000.0	Level	Aus ATC (ADS-B)
Sun 02:26:16 PM	-35.5198	137.6533	→ 109°	547.0	629.0	39000.0	Level	Aus ATC (ADS-B)
Sun 02:26:21 PM	-35.5238	137.6678	→ 108°	546.0	628.0	39000.0	Level	Aus ATC (ADS-B)
Sun 02:26:26 PM	-35.5278	137.6824	→ 109°	546.0	628.0	39000.0	Level	Aus ATC (ADS-B)
Sun 02:26:31 PM	-35.5319	137.6972	→ 108°	546.0	628.0	39000.0	Level	Aus ATC (ADS-B)
Sun 02:26:36 PM	-35.5359	137.7119	→ 108°	546.0	628.0	39000.0	Level	Aus ATC (ADS-B)
Sun 02:26:46 PM	-35.5439	137.741	→ 109°	546.0	628.0	39000.0	Level	Aus ATC (ADS-B)
Sun 02:26:50 PM	-35.5462	137.7493	→ 109°	546.0	628.0	39000.0	Level	FlightAware ADS-B (YPED)
Sun 02:26:56 PM	-35.552	137.7702	→ 108°	546.0	628.0	39000.0	Level	Aus ATC (ADS-B)
Sun 02:27:01 PM	-35.556	137.7849	→ 108°	547.0	629.0	39000.0	Level	Aus ATC (ADS-B)
Sun 02:27:11 PM	-35.564	137.8142	→ 109°	547.0	629.0	39000.0	-79 Descending	Aus ATC (ADS-B)
Sun 02:27:20 PM	-35.5714	137.8413	→ 109°	547.0	629.0	38975.0	Level	FlightAware ADS-B (ADL / YPAD)
Sun 02:27:21 PM	-35.5721	137.8437	→ 107°	547.0	629.0	39000.0	250 Climbing	Aus ATC (ADS-B)
Sun 02:27:26 PM	-35.5761	137.8583	→ 109°	547.0	629.0	39000.0	Level	Aus ATC (ADS-B)
Sun 02:27:36 PM	-35.5841	137.8878	→ 108°	547.0	629.0	39000.0	Level	Aus ATC (ADS-B)
Sun 02:27:46 PM	-35.5921	137.9171	→ 109°	547.0	629.0	39000.0	Level	Aus ATC (ADS-B)
Sun 02:27:51 PM	-35.5961	137.9318	→ 109°	547.0	629.0	39000.0	Level	Aus ATC (ADS-B)
Sun 02:27:56 PM	-35.6002	137.9466	→ 109°	547.0	629.0	39000.0	Level	Aus ATC (ADS-B)
Sun 02:28:01 PM	-35.6042	137.9612	→ 109°	548.0	631.0	39000.0	Level	Aus ATC (ADS-B)
Sun 02:28:11 PM	-35.6122	137.9905	→ 108°	548.0	631.0	39000.0	Level	Aus ATC (ADS-B)
Sun 02:28:20 PM	-35.6197	138.0186	→ 108°	549.0	632.0	39000.0	Level	FlightAware ADS-B (ADL / YPAD)
Sun 02:28:51 PM	-35.6441	138.1084	→ 109°	549.0	632.0	39000.0	Level	Aus ATC (ADS-B)
Sun 02:28:56 PM	-35.6481	138.1233	→ 108°	549.0	632.0	39000.0	Level	Aus ATC (ADS-B)
Sun 02:29:06 PM	-35.6562	138.1528	→ 108°	549.0	632.0	39000.0	Level	Aus ATC (ADS-B)
Sun 02:29:16 PM	-35.6642	138.1824	→ 108°	550.0	633.0	39000.0	Level	Aus ATC (ADS-B)
Sun 02:29:23 PM	-35.6702	138.2047	→ 108°	550.0	633.0	39000.0	Level	FlightAware ADS-B (ADL / YPAD)
Sun 02:29:31 PM	-35.6761	138.2267	→ 108°	550.0	633.0	39000.0	Level	Aus ATC (ADS-B)
Sun 02:29:41 PM	-35.6841	138.2564	→ 108°	551.0	634.0	39000.0	Level	Aus ATC (ADS-B)
Sun 02:29:46 PM	-35.688	138.2711	→ 108°	551.0	634.0	39000.0	Level	Aus ATC (ADS-B)
Sun 02:29:54 PM	-35.6948	138.296	→ 108°	551.0	634.0	39000.0	-167 Descending	Aus ATC (ADS-B)
Sun 02:29:55 PM	-35.6962	138.3014	→ 108°	552.0	635.0	38975.0	Level	FlightAware ADS-B (PAL / YPPF)
Sun 02:29:59 PM	-35.6988	138.3109	→ 108°	552.0	635.0	39000.0	136 Climbing	Aus ATC (ADS-B)
Sun 02:30:06 PM	-35.704	138.3303	→ 108°	552.0	635.0	39000.0	Level	Aus ATC (ADS-B)
Sun 02:30:11 PM	-35.708	138.3451	→ 108°	552.0	635.0	39000.0	Level	Aus ATC (ADS-B)
Sun 02:30:16 PM	-35.7121	138.3602	→ 108°	553.0	636.0	39000.0	Level	Aus ATC (ADS-B)
Sun 02:30:24 PM	-35.7187	138.3849	→ 108°	553.0	636.0	39000.0	Level	Aus ATC (ADS-B)
Sun 02:30:25 PM	-35.7204	138.3913	→ 108°	553.0	636.0	39000.0	Level	FlightAware ADS-B (ADL / YPAD)
Sun 02:30:26 PM	-35.72	138.3898	← 293°	552.0	635.0	39000.0	Level	Aus ATC (ADS-B)
Sun 02:30:36 PM	-35.7279	138.4195	→ 108°	553.0	636.0	39000.0	Level	Aus ATC (ADS-B)
Sun 02:30:39 PM	-35.7265	138.4143	← 290°	553.0	636.0	39000.0	Level	Aus ATC (ADS-B)
Sun 02:30:46 PM	-35.7359	138.4494	→ 108°	553.0	636.0	39000.0	Level	Aus ATC (ADS-B)
Sun 02:30:51 PM	-35.7399	138.4642	→ 108°	553.0	636.0	39000.0	-167 Descending	Aus ATC (ADS-B)
Sun 02:30:55 PM	-35.7438	138.479	→ 108°	553.0	636.0	38975.0	Level	FlightAware ADS-B (PAL / YPPF)
Sun 02:31:01 PM	-35.7479	138.4942	→ 108°	553.0	636.0	39000.0	94 Climbing	Aus ATC (ADS-B)
Sun 02:31:11 PM	-35.7557	138.5238	→ 108°	553.0	636.0	39000.0	Level	Aus ATC (ADS-B)
Sun 02:31:25 PM	-35.7677	138.5685	→ 108°	553.0	636.0	39000.0	Level	Aus ATC (ADS-B)
Sun 02:31:35 PM	-35.7757	138.5984	→ 109°	553.0	636.0	39000.0	Level	Aus ATC (ADS-B)
Sun 02:31:45 PM	-35.7836	138.6283	→ 108°	554.0	638.0	39000.0	Level	Aus ATC (ADS-B)
Sun 02:31:50 PM	-35.7876	138.6431	→ 108°	554.0	638.0	39000.0	Level	Aus ATC (ADS-B)
Sun 02:31:55 PM	-35.7915	138.6583	→ 108°	554.0	638.0	39000.0	Level	Aus ATC (ADS-B)
Sun 02:32:00 PM	-35.7954	138.6729	→ 108°	554.0	638.0	39000.0	Level	Aus ATC (ADS-B)
Sun 02:32:10 PM	-35.8035	138.7031	→ 108°	554.0	638.0	39000.0	Level	Aus ATC (ADS-B)
Sun 02:32:15 PM	-35.8074	138.7179	→ 108°	554.0	638.0	39000.0	Level	Aus ATC (ADS-B)
Sun 02:32:26 PM	-35.8159	138.7501	→ 108°	554.0	638.0	39000.0	Level	FlightAware ADS-B (PLO / YPLC)
Sun 02:32:55 PM	-35.8389	138.8375	→ 108°	553.0	636.0	39000.0	-50 Descending	Aus ATC (ADS-B)
Sun 02:32:56 PM	-35.8386	138.8362	→ 108°	553.0	636.0	38975.0	Level	FlightAware ADS-B (PLO / YPLC)
Sun 02:33:05 PM	-35.8467	138.8671	→ 108°	553.0	636.0	39000.0	50 Climbing	Aus ATC (ADS-B)
Sun 02:33:26 PM	-35.8635	138.9309	→ 108°	553.0	636.0	39000.0	Level	FlightAware ADS-B (ADL / YPAD)
Sun 02:33:54 PM	-35.8847	139.0114	→ 108°	552.0	635.0	39000.0	Level	Aus ATC (ADS-B)
Sun 02:33:55 PM	-35.886	139.0164	→ 106°	552.0	635.0	39000.0	Level	Aus ATC (ADS-B)
Sun 02:33:56 PM	-35.8875	139.0222	→ 108°	553.0	636.0	39000.0	Level	FlightAware ADS-B (ADL / YPAD)
Sun 02:34:05 PM	-35.8938	139.0461	→ 108°	552.0	635.0	39000.0	Level	Aus ATC (ADS-B)
Sun 02:34:10 PM	-35.8977	139.0612	→ 108°	552.0	635.0	39000.0	Level	Aus ATC (ADS-B)
Sun 02:34:15 PM	-35.9016	139.0762	→ 108°	552.0	635.0	39000.0	Level	Aus ATC (ADS-B)
Sun 02:34:20 PM	-35.9054	139.0909	→ 108°	552.0	635.0	39000.0	Level	Aus ATC (ADS-B)
Sun 02:34:25 PM	-35.9094	139.106	→ 108°	552.0	635.0	39000.0	-250 Descending	Aus ATC (ADS-B)
Sun 02:34:26 PM	-35.911	139.1122	→ 108°	553.0	636.0	38975.0	Level	FlightAware ADS-B (ADL / YPAD)
Sun 02:34:35 PM	-35.9172	139.1358	→ 108°	552.0	635.0	39000.0	50 Climbing	Aus ATC (ADS-B)
Sun 02:34:56 PM	-35.9342	139.2009	→ 108°	552.0	635.0	39000.0	Level	FlightAware ADS-B (ADL / YPAD)
Sun 02:35:14 PM	-35.9471	139.2506	→ 108°	552.0	635.0	39000.0	Level	Aus ATC (ADS-B)
Sun 02:35:25 PM	-35.956	139.285	→ 108°	551.0	634.0	39000.0	-125 Descending	Aus ATC (ADS-B)
Sun 02:35:26 PM	-35.9566	139.2874	→ 108°	551.0	634.0	38975.0	Level	FlightAware ADS-B (PAL / YPPF)
Sun 02:35:35 PM	-35.9638	139.3149	→ 108°	551.0	634.0	39000.0	79 Climbing	Aus ATC (ADS-B)
Sun 02:35:45 PM	-35.9715	139.3447	→ 108°	551.0	634.0	39000.0	Level	Aus ATC (ADS-B)
Sun 02:35:50 PM	-35.9753	139.3597	→ 108°	551.0	634.0	39000.0	-136 Descending	Aus ATC (ADS-B)
Sun 02:35:56 PM	-35.9798	139.377	→ 108°	551.0	634.0	38975.0	Level	FlightAware ADS-B (PAL / YPPF)
Sun 02:36:00 PM	-35.983	139.3896	→ 108°	551.0	634.0	39000.0	107 Climbing	Aus ATC (ADS-B)
Sun 02:36:10 PM	-35.9907	139.4193	→ 108°	552.0	635.0	39000.0	Level	Aus ATC (ADS-B)
Sun 02:36:15 PM	-35.9945	139.4342	→ 107°	552.0	635.0	39000.0	Level	Aus ATC (ADS-B)
Sun 02:36:20 PM	-35.9984	139.4494	→ 107°	552.0	635.0	39000.0	Level	Aus ATC (ADS-B)
Sun 02:36:28 PM	-36.0049	139.4744	→ 107°	552.0	635.0	39000.0	Level	Aus ATC (ADS-B)
Sun 02:36:33 PM	-36.0087	139.4894	→ 107°	552.0	635.0	39000.0	Level	Aus ATC (ADS-B)
Sun 02:36:40 PM	-36.0138	139.5093	→ 107°	552.0	635.0	39000.0	Level	Aus ATC (ADS-B)
Sun 02:36:45 PM	-36.0176	139.524	→ 107°	552.0	635.0	39000.0	Level	Aus ATC (ADS-B)
Sun 02:36:53 PM	-36.0241	139.5492	→ 108°	552.0	635.0	39000.0	Level	Aus ATC (ADS-B)
Sun 02:36:55 PM	-36.0253	139.5539	→ 107°	552.0	635.0	39000.0	Level	Aus ATC (ADS-B)
Sun 02:36:58 PM	-36.0274	139.5624	→ 108°	552.0	635.0	39000.0	Level	FlightAware ADS-B (YXAD)
Sun 02:37:05 PM	-36.033	139.584	→ 107°	552.0	635.0	39000.0	Level	Aus ATC (ADS-B)
Sun 02:37:18 PM	-36.0432	139.6242	→ 107°	553.0	636.0	39000.0	Level	Aus ATC (ADS-B)
Sun 02:37:30 PM	-36.052	139.6587	→ 107°	553.0	636.0	39000.0	Level	Aus ATC (ADS-B)
Sun 02:37:40 PM	-36.0597	139.6888	→ 108°	553.0	636.0	39000.0	Level	Aus ATC (ADS-B)
Sun 02:37:55 PM	-36.0712	139.7339	→ 108°	553.0	636.0	39000.0	Level	Aus ATC (ADS-B)
Sun 02:37:58 PM	-36.0734	139.7423	→ 107°	553.0	636.0	39000.0	Level	FlightAware ADS-B (YXAD)
Sun 02:38:05 PM	-36.0786	139.7629	→ 107°	554.0	638.0	39000.0	Level	Aus ATC (ADS-B)
Sun 02:38:10 PM	-36.0824	139.7779	→ 108°	554.0	638.0	39000.0	Level	Aus ATC (ADS-B)
Sun 02:38:15 PM	-36.0862	139.7929	→ 108°	554.0	638.0	39000.0	-83 Descending	Aus ATC (ADS-B)
Sun 02:38:28 PM	-36.0962	139.8321	→ 107°	555.0	639.0	38975.0	Level	FlightAware ADS-B (PAL / YPPF)
Sun 02:38:50 PM	-36.113	139.8986	→ 107°	556.0	640.0	39000.0	48 Climbing	Aus ATC (ADS-B)
Sun 02:38:59 PM	-36.1206	139.9288	→ 108°	556.0	640.0	39000.0	Level	Aus ATC (ADS-B)
Sun 02:39:03 PM	-36.1235	139.9402	→ 108°	556.0	640.0	39000.0	Level	Aus ATC (ADS-B)
Sun 02:39:14 PM	-36.1321	139.9744	→ 107°	557.0	641.0	39000.0	Level	Aus ATC (ADS-B)
Sun 02:39:24 PM	-36.1397	140.0045	→ 107°	556.0	640.0	39000.0	-94 Descending	Aus ATC (ADS-B)
Sun 02:39:30 PM	-36.1436	140.0199	→ 107°	557.0	641.0	38975.0	Level	FlightAware ADS-B (ADL / YPAD)
Sun 02:39:38 PM	-36.1502	140.046	→ 107°	557.0	641.0	39000.0	167 Climbing	Aus ATC (ADS-B)
Sun 02:39:39 PM	-36.1512	140.0499	→ 107°	557.0	641.0	39000.0	Level	Aus ATC (ADS-B)
Sun 02:39:49 PM	-36.1588	140.0803	→ 107°	557.0	641.0	39000.0	Level	Aus ATC (ADS-B)
Sun 02:39:59 PM	-36.1664	140.1104	→ 107°	557.0	641.0	39000.0	Level	Aus ATC (ADS-B)
Sun 02:40:00 PM	-36.1664	140.1106	→ 107°	557.0	641.0	39000.0	Level	FlightAware ADS-B (PLO / YPLC)
Sun 02:40:04 PM	-36.1702	140.1257	→ 108°	557.0	641.0	39000.0	Level	Aus ATC (ADS-B)
Sun 02:40:13 PM	-36.1768	140.152	→ 107°	557.0	641.0	39000.0	Level	Aus ATC (ADS-B)
Sun 02:40:14 PM	-36.1777	140.1558	→ 107°	557.0	641.0	39000.0	Level	Aus ATC (ADS-B)
Sun 02:40:24 PM	-36.1853	140.1862	→ 107°	558.0	642.0	39000.0	Level	Aus ATC (ADS-B)
Sun 02:40:29 PM	-36.1892	140.2015	→ 107°	558.0	642.0	39000.0	Level	Aus ATC (ADS-B)
Sun 02:40:34 PM	-36.193	140.2168	→ 108°	558.0	642.0	39000.0	Level	Aus ATC (ADS-B)
Sun 02:40:43 PM	-36.1997	140.2433	→ 107°	558.0	642.0	39000.0	Level	Aus ATC (ADS-B)
Sun 02:40:44 PM	-36.2006	140.247	→ 106°	558.0	642.0	39000.0	Level	Aus ATC (ADS-B)
Sun 02:40:54 PM	-36.2081	140.2774	→ 107°	559.0	643.0	39000.0	Level	Aus ATC (ADS-B)
Sun 02:41:01 PM	-36.2141	140.3016	→ 107°	559.0	643.0	39000.0	Level	FlightAware ADS-B (YSFG)
Sun 02:41:33 PM	-36.2374	140.3953	→ 107°	559.0	643.0	39000.0	Level	Aus ATC (ADS-B)
Sun 02:41:44 PM	-36.246	140.4299	→ 107°	559.0	643.0	39000.0	Level	Aus ATC (ADS-B)
Sun 02:41:54 PM	-36.2535	140.4601	→ 107°	559.0	643.0	39000.0	-83 Descending	Aus ATC (ADS-B)
Sun 02:42:02 PM	-36.2595	140.4847	→ 107°	559.0	643.0	38975.0	Level	FlightAware ADS-B (MQL / YMIA)
Sun 02:42:04 PM	-36.2611	140.4908	→ 109°	559.0	643.0	39000.0	214 Climbing	Aus ATC (ADS-B)
Sun 02:42:09 PM	-36.2648	140.5059	→ 107°	559.0	643.0	39000.0	Level	Aus ATC (ADS-B)
Sun 02:42:18 PM	-36.2713	140.5325	→ 107°	559.0	643.0	39000.0	Level	Aus ATC (ADS-B)
Sun 02:42:19 PM	-36.2723	140.5364	→ 110°	559.0	643.0	39000.0	Level	Aus ATC (ADS-B)
Sun 02:42:29 PM	-36.2799	140.5671	→ 107°	559.0	643.0	39000.0	Level	Aus ATC (ADS-B)
Sun 02:42:34 PM	-36.2836	140.5823	→ 107°	559.0	643.0	39000.0	Level	Aus ATC (ADS-B)
Sun 02:42:39 PM	-36.2873	140.5975	→ 107°	559.0	643.0	39000.0	Level	Aus ATC (ADS-B)
Sun 02:43:02 PM	-36.3054	140.671	→ 107°	560.0	644.0	39000.0	Level	FlightAware ADS-B (HLT / YHML)
Sun 02:43:13 PM	-36.3126	140.7006	→ 107°	560.0	644.0	39000.0	Level	Aus ATC (ADS-B)
Sun 02:43:14 PM	-36.3137	140.7046	→ 110°	560.0	644.0	39000.0	-65 Descending	Aus ATC (ADS-B)
Sun 02:43:36 PM	-36.3301	140.7717	→ 107°	562.0	647.0	38975.0	Level	FlightAware ADS-B (PAL / YPPF)
Sun 02:43:49 PM	-36.34	140.8123	→ 107°	563.0	648.0	39000.0	44 Climbing	Aus ATC (ADS-B)
Sun 02:44:10 PM	-36.3552	140.8749	→ 107°	564.0	649.0	39000.0	Level	FlightAware ADS-B (MEL / YMML)
Sun 02:44:28 PM	-36.3689	140.9311	→ 107°	564.0	649.0	39000.0	Level	Aus ATC (ADS-B)
Sun 02:44:34 PM	-36.3737	140.9513	→ 107°	565.0	650.0	39000.0	Level	Aus ATC (ADS-B)
Sun 02:44:39 PM	-36.3775	140.9666	→ 107°	565.0	650.0	39000.0	Level	Aus ATC (ADS-B)
Sun 02:44:40 PM	-36.3778	140.968	→ 107°	565.0	650.0	39000.0	Level	FlightAware ADS-B (MEL / YMML)
Sun 02:44:44 PM	-36.3812	140.982	→ 107°	565.0	650.0	39000.0	-48 Descending	Aus ATC (ADS-B)
Sun 02:45:11 PM	-36.401	141.0639	→ 107°	564.0	649.0	38975.0	Level	FlightAware ADS-B (MEL / YMML)
Sun 02:45:29 PM	-36.4148	141.1211	→ 107°	564.0	649.0	39000.0	45 Climbing	Aus ATC (ADS-B)
Sun 02:45:44 PM	-36.4259	141.1672	→ 107°	564.0	649.0	39000.0	Level	Aus ATC (ADS-B)
Sun 02:46:14 PM	-36.4491	141.2638	→ 107°	563.0	648.0	39000.0	Level	FlightAware ADS-B (MQL / YMIA)
Sun 02:46:19 PM	-36.4519	141.2756	→ 106°	563.0	648.0	39000.0	Level	Aus ATC (ADS-B)
Sun 02:46:29 PM	-36.4592	141.3063	→ 107°	563.0	648.0	39000.0	Level	Aus ATC (ADS-B)
Sun 02:46:34 PM	-36.4629	141.3219	→ 106°	563.0	648.0	39000.0	Level	Aus ATC (ADS-B)
Sun 02:46:39 PM	-36.4666	141.3371	→ 107°	563.0	648.0	39000.0	Level	Aus ATC (ADS-B)
Sun 02:46:49 PM	-36.4739	141.3681	→ 106°	563.0	648.0	39000.0	Level	Aus ATC (ADS-B)
Sun 02:46:59 PM	-36.4813	141.399	→ 107°	562.0	647.0	39000.0	Level	Aus ATC (ADS-B)
Sun 02:47:04 PM	-36.485	141.4144	→ 107°	562.0	647.0	39000.0	Level	Aus ATC (ADS-B)
Sun 02:47:14 PM	-36.4923	141.4451	→ 106°	563.0	648.0	39000.0	Level	Aus ATC (ADS-B)
Sun 02:47:15 PM	-36.493	141.4484	→ 106°	563.0	648.0	39000.0	Level	FlightAware ADS-B (MGB / YMTG)
Sun 02:47:24 PM	-36.4997	141.476	→ 106°	562.0	647.0	39000.0	-50 Descending	Aus ATC (ADS-B)
Sun 02:47:45 PM	-36.5154	141.5428	→ 106°	563.0	648.0	38975.0	Level	FlightAware ADS-B (YBRS)
Sun 02:47:49 PM	-36.518	141.5534	→ 107°	563.0	648.0	39000.0	79 Climbing	Aus ATC (ADS-B)
Sun 02:48:04 PM	-36.529	141.5998	→ 106°	564.0	649.0	39000.0	Level	Aus ATC (ADS-B)
Sun 02:48:14 PM	-36.5363	141.6306	→ 106°	564.0	649.0	39000.0	Level	Aus ATC (ADS-B)
Sun 02:48:15 PM	-36.5367	141.6327	→ 106°	565.0	650.0	39000.0	Level	FlightAware ADS-B (PTJ / YPOD)
Sun 02:48:24 PM	-36.5436	141.6617	→ 107°	566.0	651.0	39000.0	Level	Aus ATC (ADS-B)
Sun 02:48:29 PM	-36.5472	141.6772	→ 106°	566.0	651.0	39000.0	Level	Aus ATC (ADS-B)
Sun 02:48:44 PM	-36.5582	141.7239	→ 106°	566.0	651.0	39000.0	Level	Aus ATC (ADS-B)
Sun 02:48:49 PM	-36.5618	141.7394	→ 106°	566.0	651.0	39000.0	Level	Aus ATC (ADS-B)
Sun 02:48:54 PM	-36.5655	141.7552	→ 106°	566.0	651.0	39000.0	Level	Aus ATC (ADS-B)
Sun 02:48:58 PM	-36.5691	141.7707	→ 106°	566.0	651.0	39000.0	Level	Aus ATC (ADS-B)
Sun 02:49:08 PM	-36.5765	141.802	→ 106°	566.0	651.0	39000.0	Level	Aus ATC (ADS-B)
Sun 02:49:18 PM	-36.5838	141.8331	→ 106°	566.0	651.0	39000.0	Level	Aus ATC (ADS-B)
Sun 02:49:23 PM	-36.5873	141.8485	→ 106°	566.0	651.0	39000.0	Level	Aus ATC (ADS-B)
Sun 02:49:33 PM	-36.5946	141.8797	→ 106°	566.0	651.0	39000.0	Level	Aus ATC (ADS-B)
Sun 02:49:43 PM	-36.6019	141.9109	→ 106°	566.0	651.0	39000.0	-88 Descending	Aus ATC (ADS-B)
Sun 02:49:50 PM	-36.6065	141.9308	→ 106°	566.0	651.0	38975.0	Level	FlightAware ADS-B (ARY / YARA)
Sun 02:50:18 PM	-36.6272	142.0199	→ 106°	565.0	650.0	39000.0	50 Climbing	Aus ATC (ADS-B)
Sun 02:50:20 PM	-36.6284	142.025	→ 106°	565.0	650.0	39000.0	Level	FlightAware ADS-B (MGB / YMTG)
Sun 02:50:23 PM	-36.6308	142.0355	→ 106°	565.0	650.0	39000.0	Level	Aus ATC (ADS-B)
Sun 02:50:28 PM	-36.6344	142.0511	→ 106°	565.0	650.0	39000.0	Level	Aus ATC (ADS-B)
Sun 02:50:33 PM	-36.638	142.0666	→ 106°	565.0	650.0	39000.0	Level	Aus ATC (ADS-B)
Sun 02:50:43 PM	-36.6452	142.0976	→ 106°	565.0	650.0	39000.0	Level	Aus ATC (ADS-B)
Sun 02:50:48 PM	-36.6488	142.1132	→ 107°	565.0	650.0	39000.0	Level	Aus ATC (ADS-B)
Sun 02:50:53 PM	-36.6525	142.1289	→ 106°	566.0	651.0	39000.0	Level	Aus ATC (ADS-B)
Sun 02:50:54 PM	-36.6531	142.1316	→ 106°	566.0	651.0	39000.0	Level	FlightAware ADS-B (MBW / YMMB)
Sun 02:50:58 PM	-36.656	142.1444	→ 106°	566.0	651.0	39000.0	Level	Aus ATC (ADS-B)
Sun 02:51:03 PM	-36.6597	142.1601	→ 106°	566.0	651.0	39000.0	Level	Aus ATC (ADS-B)
Sun 02:51:13 PM	-36.6669	142.1914	→ 106°	567.0	652.0	39000.0	-71 Descending	Aus ATC (ADS-B)
Sun 02:51:24 PM	-36.6749	142.2264	→ 106°	568.0	654.0	38975.0	Level	FlightAware ADS-B (ARY / YARA)
Sun 02:51:28 PM	-36.6777	142.2383	→ 106°	569.0	655.0	39000.0	107 Climbing	Aus ATC (ADS-B)
Sun 02:51:38 PM	-36.6849	142.2698	→ 106°	570.0	656.0	39000.0	Level	Aus ATC (ADS-B)
Sun 02:51:48 PM	-36.6921	142.3011	→ 106°	571.0	657.0	39000.0	Level	Aus ATC (ADS-B)
Sun 02:51:54 PM	-36.6965	142.3207	→ 106°	572.0	658.0	39000.0	Level	FlightAware ADS-B (ARY / YARA)
Sun 02:52:03 PM	-36.7029	142.3485	→ 106°	573.0	659.0	39000.0	Level	Aus ATC (ADS-B)
Sun 02:52:13 PM	-36.7101	142.3802	→ 106°	574.0	661.0	39000.0	Level	Aus ATC (ADS-B)
Sun 02:52:18 PM	-36.7138	142.3962	→ 106°	574.0	661.0	39000.0	Level	Aus ATC (ADS-B)
Sun 02:52:23 PM	-36.7174	142.4119	→ 106°	574.0	661.0	39000.0	-214 Descending	Aus ATC (ADS-B)
Sun 02:52:25 PM	-36.7187	142.4176	→ 106°	574.0	661.0	38975.0	Level	FlightAware ADS-B (MEL / YMML)
Sun 02:52:28 PM	-36.721	142.4275	→ 107°	574.0	661.0	39000.0	115 Climbing	Aus ATC (ADS-B)
Sun 02:52:38 PM	-36.7283	142.4595	→ 106°	575.0	662.0	39000.0	Level	Aus ATC (ADS-B)
Sun 02:52:43 PM	-36.7319	142.4753	→ 106°	575.0	662.0	39000.0	Level	Aus ATC (ADS-B)
Sun 02:52:48 PM	-36.7355	142.4912	→ 105°	575.0	662.0	39000.0	Level	Aus ATC (ADS-B)
Sun 02:52:53 PM	-36.7391	142.5071	→ 106°	575.0	662.0	39000.0	Level	Aus ATC (ADS-B)
Sun 02:52:58 PM	-36.7427	142.5229	→ 106°	575.0	662.0	39000.0	Level	Aus ATC (ADS-B)
Sun 02:53:08 PM	-36.7499	142.5546	→ 106°	577.0	664.0	39000.0	Level	Aus ATC (ADS-B)
Sun 02:53:23 PM	-36.7608	142.6028	→ 106°	579.0	666.0	39000.0	-52 Descending	Aus ATC (ADS-B)
Sun 02:53:37 PM	-36.7706	142.646	→ 106°	581.0	669.0	38975.0	Level	FlightAware ADS-B (YMPC)
Sun 02:54:08 PM	-36.7933	142.7472	→ 106°	584.0	672.0	39000.0	42 Climbing	Aus ATC (ADS-B)
Sun 02:54:13 PM	-36.797	142.7635	→ 106°	584.0	672.0	39000.0	Level	Aus ATC (ADS-B)
Sun 02:54:18 PM	-36.8006	142.7795	→ 105°	584.0	672.0	39000.0	Level	Aus ATC (ADS-B)
Sun 02:54:23 PM	-36.8042	142.7958	→ 105°	584.0	672.0	39000.0	Level	Aus ATC (ADS-B)
Sun 02:54:28 PM	-36.8079	142.812	→ 106°	584.0	672.0	39000.0	Level	Aus ATC (ADS-B)
Sun 02:54:38 PM	-36.8151	142.8442	→ 106°	584.0	672.0	39000.0	Level	Aus ATC (ADS-B)
Sun 02:54:43 PM	-36.8187	142.8604	→ 105°	584.0	672.0	39000.0	Level	Aus ATC (ADS-B)
Sun 02:55:11 PM	-36.8397	142.9545	→ 106°	586.0	674.0	39000.0	Level	FlightAware ADS-B (YXWG)
Sun 02:55:18 PM	-36.8441	142.9739	→ 105°	586.0	674.0	39000.0	Level	Aus ATC (ADS-B)
Sun 02:55:28 PM	-36.8513	143.0063	→ 106°	586.0	674.0	39000.0	Level	Aus ATC (ADS-B)
Sun 02:55:42 PM	-36.8614	143.0517	→ 105°	586.0	674.0	39000.0	Level	FlightAware ADS-B (BXG / YBDG)
Sun 02:56:03 PM	-36.8765	143.1201	→ 105°	585.0	673.0	39000.0	Level	Aus ATC (ADS-B)
Sun 02:56:13 PM	-36.8836	143.1524	→ 105°	585.0	673.0	39000.0	Level	Aus ATC (ADS-B)
Sun 02:56:18 PM	-36.8872	143.1686	→ 105°	584.0	672.0	39000.0	Level	Aus ATC (ADS-B)
Sun 02:56:23 PM	-36.8908	143.185	→ 106°	584.0	672.0	39000.0	Level	Aus ATC (ADS-B)
Sun 02:56:28 PM	-36.8944	143.201	→ 106°	584.0	672.0	39000.0	Level	Aus ATC (ADS-B)
Sun 02:56:38 PM	-36.9015	143.2333	→ 105°	583.0	671.0	39000.0	Level	Aus ATC (ADS-B)
Sun 02:56:43 PM	-36.9051	143.2495	→ 105°	583.0	671.0	39000.0	Level	Aus ATC (ADS-B)
Sun 02:56:48 PM	-36.9087	143.2659	→ 106°	583.0	671.0	39000.0	Level	Aus ATC (ADS-B)
Sun 02:56:53 PM	-36.9123	143.282	→ 106°	582.0	670.0	39000.0	Level	Aus ATC (ADS-B)
Sun 02:56:58 PM	-36.9158	143.2982	→ 105°	582.0	670.0	39000.0	Level	Aus ATC (ADS-B)
Sun 02:57:08 PM	-36.9229	143.3305	→ 105°	581.0	669.0	39000.0	Level	Aus ATC (ADS-B)
Sun 02:57:12 PM	-36.9266	143.347	→ 105°	581.0	669.0	39000.0	Level	FlightAware ADS-B (MEL / YMML)
Sun 02:57:18 PM	-36.9301	143.3627	→ 106°	581.0	669.0	39000.0	Level	Aus ATC (ADS-B)
Sun 02:57:23 PM	-36.9335	143.3786	→ 105°	581.0	669.0	39000.0	Level	Aus ATC (ADS-B)
Sun 02:57:33 PM	-36.9406	143.4107	→ 106°	579.0	666.0	39000.0	Level	Aus ATC (ADS-B)
Sun 02:57:43 PM	-36.9476	143.443	→ 105°	579.0	666.0	39000.0	-115 Descending	Aus ATC (ADS-B)
Sun 02:57:46 PM	-36.9503	143.4553	→ 105°	579.0	666.0	38975.0	Level	FlightAware ADS-B (NRA / YNAR)
Sun 02:57:58 PM	-36.9581	143.4911	→ 105°	579.0	666.0	39000.0	68 Climbing	Aus ATC (ADS-B)
Sun 02:58:08 PM	-36.9652	143.5235	→ 105°	579.0	666.0	39000.0	Level	Aus ATC (ADS-B)
Sun 02:58:13 PM	-36.9686	143.5395	→ 105°	579.0	666.0	39000.0	Level	Aus ATC (ADS-B)
Sun 02:58:18 PM	-36.9721	143.5555	→ 106°	579.0	666.0	39000.0	Level	Aus ATC (ADS-B)
Sun 02:58:23 PM	-36.9756	143.5717	→ 105°	579.0	666.0	39000.0	Level	Aus ATC (ADS-B)
Sun 02:58:33 PM	-36.9825	143.6038	→ 105°	579.0	666.0	39000.0	Level	Aus ATC (ADS-B)
Sun 02:58:38 PM	-36.986	143.62	→ 105°	580.0	667.0	39000.0	Level	Aus ATC (ADS-B)
Sun 02:58:43 PM	-36.9894	143.636	→ 105°	580.0	667.0	39000.0	Level	Aus ATC (ADS-B)
Sun 02:58:48 PM	-36.9929	143.652	→ 105°	580.0	667.0	39000.0	Level	Aus ATC (ADS-B)
Sun 02:58:53 PM	-36.9964	143.6681	→ 105°	580.0	667.0	39000.0	Level	Aus ATC (ADS-B)
Sun 02:59:03 PM	-37.0033	143.7006	→ 105°	580.0	667.0	39000.0	Level	Aus ATC (ADS-B)
Sun 02:59:12 PM	-37.0102	143.7327	→ 105°	580.0	667.0	39000.0	Level	Aus ATC (ADS-B)
Sun 02:59:17 PM	-37.0138	143.7489	→ 106°	580.0	667.0	39000.0	Level	Aus ATC (ADS-B)
Sun 02:59:27 PM	-37.0206	143.7811	→ 105°	581.0	669.0	39000.0	-107 Descending	Aus ATC (ADS-B)
Sun 02:59:31 PM	-37.0227	143.7906	→ 105°	581.0	669.0	38975.0	Level	FlightAware ADS-B (MBW / YMMB)
Sun 02:59:37 PM	-37.0276	143.8136	→ 105°	581.0	669.0	39000.0	71 Climbing	Aus ATC (ADS-B)
Sun 02:59:52 PM	-37.038	143.8621	→ 105°	581.0	669.0	39000.0	Level	Aus ATC (ADS-B)
Sun 03:00:02 PM	-37.0449	143.8943	→ 105°	581.0	669.0	39000.0	Level	Aus ATC (ADS-B)
Sun 03:00:12 PM	-37.0518	143.9267	→ 105°	581.0	669.0	39000.0	Level	Aus ATC (ADS-B)
Sun 03:00:17 PM	-37.0552	143.9427	→ 105°	579.0	666.0	39000.0	Level	Aus ATC (ADS-B)
Sun 03:00:22 PM	-37.0587	143.9589	→ 105°	579.0	666.0	39000.0	-107 Descending	Aus ATC (ADS-B)
Sun 03:00:31 PM	-37.0644	143.9857	→ 105°	579.0	666.0	38975.0	Level	FlightAware ADS-B (YAFD)
Sun 03:00:57 PM	-37.0827	144.0718	→ 105°	579.0	666.0	39000.0	50 Climbing	Aus ATC (ADS-B)
Sun 03:01:01 PM	-37.085	144.083	→ 105°	580.0	667.0	39000.0	Level	FlightAware ADS-B (YAFD)
Sun 03:01:07 PM	-37.0895	144.1041	→ 105°	580.0	667.0	39000.0	Level	Aus ATC (ADS-B)
Sun 03:01:31 PM	-37.1056	144.1802	→ 105°	580.0	667.0	39000.0	150 Climbing	FlightAware ADS-B (MEL / YMML)
Sun 03:01:47 PM	-37.1169	144.2335	→ 105°	581.0	669.0	39100.0	692 Climbing	Aus ATC (ADS-B)
Sun 03:01:57 PM	-37.1237	144.2661	→ 105°	580.0	667.0	39300.0	964 Climbing	Aus ATC (ADS-B)
Sun 03:02:01 PM	-37.1264	144.2788	→ 105°	579.0	666.0	39325.0	600 Climbing	FlightAware ADS-B (MEL / YMML)
Sun 03:02:07 PM	-37.1305	144.2984	→ 105°	580.0	667.0	39400.0	955 Climbing	Aus ATC (ADS-B)
Sun 03:02:12 PM	-37.1339	144.3146	→ 105°	579.0	666.0	39500.0	1,200 Climbing	Aus ATC (ADS-B)
Sun 03:02:17 PM	-37.1373	144.3305	→ 105°	579.0	666.0	39600.0	1,200 Climbing	Aus ATC (ADS-B)
Sun 03:02:22 PM	-37.1407	144.3469	→ 105°	578.0	665.0	39700.0	1,200 Climbing	Aus ATC (ADS-B)
Sun 03:02:32 PM	-37.1474	144.379	→ 105°	578.0	665.0	39900.0	800 Climbing	Aus ATC (ADS-B)
Sun 03:02:37 PM	-37.1508	144.395	→ 105°	577.0	664.0	39900.0	600 Climbing	Aus ATC (ADS-B)
Sun 03:02:42 PM	-37.1542	144.4112	→ 105°	577.0	664.0	40000.0	1,200 Climbing	Aus ATC (ADS-B)
Sun 03:02:47 PM	-37.1575	144.4274	→ 104°	575.0	662.0	40100.0	1,200 Climbing	Aus ATC (ADS-B)
Sun 03:02:52 PM	-37.1608	144.4434	→ 104°	575.0	662.0	40200.0	800 Climbing	Aus ATC (ADS-B)
Sun 03:03:02 PM	-37.1675	144.4755	→ 105°	575.0	662.0	40300.0	692 Climbing	Aus ATC (ADS-B)
Sun 03:03:31 PM	-37.1864	144.5664	→ 105°	574.0	661.0	40650.0	686 Climbing	FlightAware ADS-B (AVV / YMAV)
Sun 03:03:37 PM	-37.1908	144.5877	→ 104°	573.0	659.0	40700.0	714 Climbing	Aus ATC (ADS-B)
Sun 03:03:52 PM	-37.2008	144.6361	→ 105°	573.0	659.0	40900.0	720 Climbing	Aus ATC (ADS-B)
Sun 03:04:02 PM	-37.2074	144.6681	→ 105°	573.0	659.0	41000.0	77 Climbing	Aus ATC (ADS-B)
Sun 03:04:31 PM	-37.2263	144.7596	→ 104°	573.0	659.0	40950.0	Level	FlightAware ADS-B (YAFD)
Sun 03:04:52 PM	-37.2404	144.8283	→ 105°	573.0	659.0	41000.0	115 Climbing	Aus ATC (ADS-B)
Sun 03:04:57 PM	-37.2436	144.8441	→ 104°	574.0	661.0	41000.0	Level	Aus ATC (ADS-B)
Sun 03:05:02 PM	-37.2466	144.8589	→ 104°	573.0	659.0	41000.0	-43 Descending	FlightAware ADS-B (MEL / YMML)
Sun 03:05:32 PM	-37.2658	144.9526	→ 104°	574.0	661.0	40975.0	Level	FlightAware ADS-B (YTYA)
Sun 03:05:42 PM	-37.2732	144.9888	→ 105°	575.0	662.0	41000.0	60 Climbing	Aus ATC (ADS-B)
Sun 03:05:57 PM	-37.283	145.0372	→ 104°	575.0	662.0	41000.0	Level	Aus ATC (ADS-B)
Sun 03:06:02 PM	-37.2862	145.0531	→ 104°	574.0	661.0	41000.0	Level	FlightAware ADS-B (MEL / YMML)
Sun 03:06:07 PM	-37.2895	145.0693	→ 104°	575.0	662.0	41000.0	Level	Aus ATC (ADS-B)
Sun 03:06:17 PM	-37.296	145.1016	→ 104°	574.0	661.0	41000.0	Level	Aus ATC (ADS-B)
Sun 03:06:22 PM	-37.2993	145.1176	→ 105°	574.0	661.0	41000.0	Level	Aus ATC (ADS-B)
Sun 03:06:32 PM	-37.3058	145.1499	→ 104°	574.0	661.0	41000.0	Level	Aus ATC (ADS-B)
Sun 03:06:42 PM	-37.3123	145.1819	→ 104°	572.0	658.0	41000.0	Level	Aus ATC (ADS-B)
Sun 03:06:47 PM	-37.3155	145.1978	→ 104°	572.0	658.0	41000.0	Level	Aus ATC (ADS-B)
Sun 03:06:52 PM	-37.3187	145.2139	→ 104°	572.0	658.0	41000.0	Level	Aus ATC (ADS-B)
Sun 03:07:02 PM	-37.3258	145.2496	→ 104°	571.0	657.0	41000.0	Level	FlightAware ADS-B (HLT / YHML)
Sun 03:07:12 PM	-37.3315	145.2779	→ 104°	571.0	657.0	41000.0	Level	Aus ATC (ADS-B)
Sun 03:07:17 PM	-37.3347	145.2941	→ 104°	571.0	657.0	41000.0	Level	Aus ATC (ADS-B)
Sun 03:07:33 PM	-37.345	145.3456	→ 104°	571.0	657.0	41000.0	Level	FlightAware ADS-B (YLIL)
Sun 03:07:50 PM	-37.3561	145.4011	→ 104°	572.0	658.0	41000.0	Level	Aus ATC (ADS-B)
Sun 03:08:02 PM	-37.3635	145.4385	→ 104°	572.0	658.0	41000.0	-100 Descending	Aus ATC (ADS-B)
Sun 03:08:05 PM	-37.3654	145.4478	→ 104°	572.0	658.0	40975.0	Level	FlightAware ADS-B (YAFD)
Sun 03:08:12 PM	-37.3699	145.4705	→ 104°	572.0	658.0	41000.0	75 Climbing	Aus ATC (ADS-B)
Sun 03:08:25 PM	-37.3785	145.5136	→ 104°	572.0	658.0	41000.0	Level	Aus ATC (ADS-B)
Sun 03:08:27 PM	-37.3794	145.5187	→ 104°	573.0	659.0	41000.0	Level	Aus ATC (ADS-B)
Sun 03:08:37 PM	-37.3858	145.5508	→ 104°	573.0	659.0	41000.0	Level	Aus ATC (ADS-B)
Sun 03:08:40 PM	-37.388	145.562	→ 104°	573.0	659.0	41000.0	Level	Aus ATC (ADS-B)
Sun 03:08:47 PM	-37.3922	145.583	→ 104°	574.0	661.0	41000.0	Level	Aus ATC (ADS-B)
Sun 03:08:52 PM	-37.3954	145.5992	→ 104°	574.0	661.0	41000.0	Level	Aus ATC (ADS-B)
Sun 03:09:00 PM	-37.4008	145.6263	→ 104°	575.0	662.0	41000.0	Level	Aus ATC (ADS-B)
Sun 03:09:02 PM	-37.4018	145.6316	→ 102°	575.0	662.0	41000.0	-250 Descending	Aus ATC (ADS-B)
Sun 03:09:06 PM	-37.4045	145.6451	→ 104°	575.0	662.0	40975.0	Level	FlightAware ADS-B (BWT / YWYY)
Sun 03:09:17 PM	-37.4113	145.6798	→ 104°	576.0	663.0	41000.0	94 Climbing	Aus ATC (ADS-B)
Sun 03:09:22 PM	-37.4145	145.696	→ 104°	576.0	663.0	41000.0	Level	Aus ATC (ADS-B)
Sun 03:09:27 PM	-37.4177	145.7122	→ 104°	576.0	663.0	41000.0	Level	Aus ATC (ADS-B)
Sun 03:09:31 PM	-37.4208	145.7286	→ 103°	577.0	664.0	41000.0	Level	Aus ATC (ADS-B)
Sun 03:09:38 PM	-37.4241	145.745	→ 104°	577.0	664.0	41000.0	Level	FlightAware ADS-B (YLIL)
Sun 03:09:41 PM	-37.4272	145.7608	→ 104°	577.0	664.0	41000.0	Level	Aus ATC (ADS-B)
Sun 03:09:45 PM	-37.4294	145.7721	→ 104°	577.0	664.0	41000.0	Level	Aus ATC (ADS-B)
Sun 03:09:51 PM	-37.4336	145.7933	→ 104°	577.0	664.0	41000.0	Level	Aus ATC (ADS-B)
Sun 03:09:56 PM	-37.4367	145.8096	→ 103°	577.0	664.0	41000.0	Level	Aus ATC (ADS-B)
Sun 03:10:08 PM	-37.4437	145.8454	→ 104°	577.0	664.0	41000.0	Level	FlightAware ADS-B
Sun 03:10:41 PM	-37.4652	145.9555	→ 104°	576.0	663.0	41000.0	-44 Descending	Aus ATC (ADS-B)
Sun 03:10:42 PM	-37.4658	145.9588	→ 104°	576.0	663.0	40975.0	Level	FlightAware ADS-B (ABX / YMAY)
Sun 03:10:51 PM	-37.4715	145.988	→ 104°	575.0	662.0	41000.0	107 Climbing	Aus ATC (ADS-B)
Sun 03:10:56 PM	-37.4746	146.0043	→ 104°	575.0	662.0	41000.0	Level	Aus ATC (ADS-B)
Sun 03:11:05 PM	-37.4799	146.0313	→ 104°	575.0	662.0	41000.0	Level	Aus ATC (ADS-B)
Sun 03:11:06 PM	-37.4809	146.0368	→ 103°	575.0	662.0	41000.0	Level	Aus ATC (ADS-B)
Sun 03:11:12 PM	-37.4845	146.0552	→ 104°	575.0	662.0	41000.0	Level	FlightAware ADS-B (YSBE)
Sun 03:11:16 PM	-37.4872	146.0691	→ 104°	575.0	662.0	41000.0	Level	Aus ATC (ADS-B)
Sun 03:11:21 PM	-37.4904	146.0854	→ 104°	575.0	662.0	41000.0	Level	Aus ATC (ADS-B)
Sun 03:11:26 PM	-37.4935	146.1014	→ 103°	575.0	662.0	41000.0	Level	Aus ATC (ADS-B)
Sun 03:11:31 PM	-37.4966	146.1174	→ 103°	575.0	662.0	41000.0	Level	Aus ATC (ADS-B)
Sun 03:11:36 PM	-37.4997	146.1339	→ 103°	575.0	662.0	41000.0	Level	Aus ATC (ADS-B)
Sun 03:11:42 PM	-37.503	146.1512	→ 104°	576.0	663.0	41000.0	Level	FlightAware ADS-B (MBW / YMMB)
Sun 03:11:46 PM	-37.506	146.1663	→ 104°	576.0	663.0	41000.0	Level	Aus ATC (ADS-B)
Sun 03:11:50 PM	-37.508	146.1773	→ 103°	576.0	663.0	41000.0	Level	Aus ATC (ADS-B)
Sun 03:11:56 PM	-37.5121	146.1986	→ 104°	576.0	663.0	41000.0	Level	Aus ATC (ADS-B)
Sun 03:12:01 PM	-37.5152	146.2149	→ 104°	576.0	663.0	41000.0	Level	Aus ATC (ADS-B)
Sun 03:12:11 PM	-37.5215	146.2474	→ 104°	576.0	663.0	41000.0	-107 Descending	Aus ATC (ADS-B)
Sun 03:12:15 PM	-37.5239	146.2602	→ 104°	576.0	663.0	40975.0	Level	FlightAware ADS-B (YLIL)
Sun 03:12:25 PM	-37.5298	146.291	→ 103°	576.0	663.0	41000.0	75 Climbing	Aus ATC (ADS-B)
Sun 03:12:35 PM	-37.5359	146.3235	→ 103°	576.0	663.0	41000.0	Level	Aus ATC (ADS-B)
Sun 03:12:46 PM	-37.5431	146.3609	→ 103°	576.0	663.0	41000.0	Level	Aus ATC (ADS-B)
Sun 03:12:56 PM	-37.5493	146.3936	→ 104°	577.0	664.0	41000.0	Level	Aus ATC (ADS-B)
Sun 03:13:00 PM	-37.5513	146.4043	→ 104°	577.0	664.0	41000.0	Level	Aus ATC (ADS-B)
Sun 03:13:10 PM	-37.5576	146.4373	→ 103°	577.0	664.0	41000.0	Level	Aus ATC (ADS-B)
Sun 03:13:11 PM	-37.5585	146.4422	→ 102°	577.0	664.0	41000.0	Level	Aus ATC (ADS-B)
Sun 03:13:21 PM	-37.5647	146.475	→ 103°	578.0	665.0	41000.0	Level	Aus ATC (ADS-B)
Sun 03:13:25 PM	-37.5668	146.4858	→ 104°	578.0	665.0	41000.0	Level	Aus ATC (ADS-B)
Sun 03:13:31 PM	-37.5709	146.5075	→ 103°	578.0	665.0	41000.0	Level	Aus ATC (ADS-B)
Sun 03:13:51 PM	-37.5827	146.5702	→ 103°	578.0	665.0	41000.0	Level	FlightAware ADS-B (YMPC)
Sun 03:14:14 PM	-37.5975	146.6492	→ 103°	576.0	663.0	41000.0	Level	Aus ATC (ADS-B)
Sun 03:14:16 PM	-37.5985	146.6542	→ 103°	576.0	663.0	41000.0	-214 Descending	Aus ATC (ADS-B)
Sun 03:14:21 PM	-37.601	146.6677	→ 103°	576.0	663.0	40975.0	Level	FlightAware ADS-B (YLIL)
Sun 03:14:26 PM	-37.6045	146.6868	→ 103°	577.0	664.0	41000.0	188 Climbing	Aus ATC (ADS-B)
Sun 03:14:29 PM	-37.6066	146.698	→ 104°	577.0	664.0	41000.0	Level	Aus ATC (ADS-B)
Sun 03:14:39 PM	-37.6128	146.7307	→ 103°	578.0	665.0	41000.0	Level	Aus ATC (ADS-B)
Sun 03:14:41 PM	-37.6137	146.7357	→ 104°	578.0	665.0	41000.0	Level	Aus ATC (ADS-B)
Sun 03:14:51 PM	-37.6198	146.7684	→ 103°	579.0	666.0	41000.0	Level	Aus ATC (ADS-B)
Sun 03:14:52 PM	-37.6196	146.7672	→ 103°	579.0	666.0	41000.0	Level	FlightAware ADS-B (CBR / YSCB)
Sun 03:15:04 PM	-37.6279	146.812	→ 103°	579.0	666.0	41000.0	-50 Descending	Aus ATC (ADS-B)
Sun 03:15:22 PM	-37.6386	146.8696	→ 103°	580.0	667.0	40975.0	Level	FlightAware ADS-B (YBRS)
Sun 03:15:36 PM	-37.6472	146.9161	→ 103°	581.0	669.0	41000.0	79 Climbing	Aus ATC (ADS-B)
Sun 03:15:41 PM	-37.6502	146.9325	→ 103°	582.0	670.0	41000.0	Level	Aus ATC (ADS-B)
Sun 03:15:58 PM	-37.6612	146.9919	→ 103°	583.0	671.0	41000.0	Level	FlightAware ADS-B (YDPO)
Sun 03:16:21 PM	-37.6745	147.0646	→ 103°	584.0	672.0	41000.0	Level	Aus ATC (ADS-B)
Sun 03:16:24 PM	-37.6766	147.0757	→ 104°	585.0	673.0	41000.0	-214 Descending	Aus ATC (ADS-B)
Sun 03:16:28 PM	-37.6795	147.0912	→ 103°	585.0	673.0	40975.0	Level	FlightAware ADS-B (YDPO)
Sun 03:16:31 PM	-37.6806	147.0976	→ 102°	585.0	673.0	41000.0	188 Climbing	Aus ATC (ADS-B)
Sun 03:16:36 PM	-37.6837	147.1142	→ 104°	585.0	673.0	41000.0	Level	Aus ATC (ADS-B)
Sun 03:16:46 PM	-37.6897	147.1473	→ 103°	585.0	673.0	41000.0	Level	Aus ATC (ADS-B)
Sun 03:16:56 PM	-37.6959	147.1806	→ 103°	586.0	674.0	41000.0	-125 Descending	Aus ATC (ADS-B)
Sun 03:16:58 PM	-37.698	147.1925	→ 103°	586.0	674.0	40975.0	Level	FlightAware ADS-B (YDPO)
Sun 03:17:09 PM	-37.7039	147.2248	→ 103°	586.0	674.0	41000.0	115 Climbing	Aus ATC (ADS-B)
Sun 03:17:11 PM	-37.7049	147.2301	→ 104°	586.0	674.0	41000.0	Level	Aus ATC (ADS-B)
Sun 03:17:21 PM	-37.711	147.2636	→ 103°	586.0	674.0	41000.0	Level	Aus ATC (ADS-B)
Sun 03:17:24 PM	-37.713	147.2747	→ 103°	586.0	674.0	41000.0	-188 Descending	Aus ATC (ADS-B)
Sun 03:17:29 PM	-37.7162	147.2922	→ 103°	586.0	674.0	40975.0	Level	FlightAware ADS-B (YDPO)
Sun 03:17:31 PM	-37.717	147.2967	→ 102°	586.0	674.0	41000.0	50 Climbing	Aus ATC (ADS-B)
Sun 03:17:59 PM	-37.7342	147.3917	→ 103°	587.0	676.0	41000.0	Level	FlightAware ADS-B (YDPO)
Sun 03:18:06 PM	-37.738	147.413	→ 103°	587.0	676.0	41000.0	Level	Aus ATC (ADS-B)
Sun 03:18:14 PM	-37.7431	147.441	→ 103°	586.0	674.0	41000.0	Level	Aus ATC (ADS-B)
Sun 03:18:16 PM	-37.744	147.4463	→ 103°	586.0	674.0	41000.0	-100 Descending	Aus ATC (ADS-B)
Sun 03:18:29 PM	-37.7522	147.4916	→ 103°	586.0	674.0	40975.0	Level	FlightAware ADS-B (YDPO)
Sun 03:18:59 PM	-37.7702	147.5922	→ 103°	586.0	674.0	41000.0	26 Climbing	FlightAware ADS-B (YDPO)
Sun 03:19:26 PM	-37.7857	147.6791	→ 103°	586.0	674.0	41000.0	Level	Aus ATC (ADS-B)
Sun 03:19:29 PM	-37.7877	147.6904	→ 102°	586.0	674.0	41000.0	Level	Aus ATC (ADS-B)
Sun 03:19:36 PM	-37.7916	147.7123	→ 103°	586.0	674.0	41000.0	Level	Aus ATC (ADS-B)
Sun 03:19:59 PM	-37.8058	147.7925	→ 103°	586.0	674.0	41000.0	Level	FlightAware ADS-B (YDPO)
Sun 03:20:10 PM	-37.8122	147.8287	→ 103°	585.0	673.0	41000.0	Level	Aus ATC (ADS-B)
Sun 03:20:19 PM	-37.8171	147.8567	→ 103°	585.0	673.0	41000.0	Level	Aus ATC (ADS-B)
Sun 03:20:24 PM	-37.82	147.8732	→ 103°	585.0	673.0	41000.0	Level	Aus ATC (ADS-B)
Sun 03:20:30 PM	-37.8239	147.8953	→ 103°	585.0	673.0	41000.0	Level	Aus ATC (ADS-B)
Sun 03:21:01 PM	-37.8413	147.9943	→ 102°	585.0	673.0	41000.0	Level	FlightAware ADS-B (LST / YMLT)
Sun 03:21:10 PM	-37.8473	148.0283	→ 102°	586.0	674.0	41000.0	Level	Aus ATC (ADS-B)
Sun 03:21:20 PM	-37.8531	148.0616	→ 102°	586.0	674.0	41000.0	Level	Aus ATC (ADS-B)
Sun 03:21:24 PM	-37.8551	148.073	→ 103°	586.0	674.0	41000.0	Level	Aus ATC (ADS-B)
Sun 03:21:31 PM	-37.8592	148.0967	→ 102°	586.0	674.0	41000.0	-41 Descending	FlightAware ADS-B (LST / YMLT)
Sun 03:22:01 PM	-37.8766	148.1973	→ 102°	584.0	672.0	40975.0	Level	FlightAware ADS-B (LST / YMLT)
Sun 03:22:29 PM	-37.8925	148.2893	→ 102°	584.0	672.0	41000.0	48 Climbing	Aus ATC (ADS-B)
Sun 03:22:32 PM	-37.8939	148.2977	→ 102°	584.0	672.0	41000.0	Level	FlightAware ADS-B (MBW / YMMB)
Sun 03:22:39 PM	-37.8982	148.3224	→ 103°	584.0	672.0	41000.0	Level	Aus ATC (ADS-B)
Sun 03:22:40 PM	-37.8991	148.328	→ 101°	583.0	671.0	41000.0	Level	Aus ATC (ADS-B)
Sun 03:22:50 PM	-37.9048	148.361	→ 102°	583.0	671.0	41000.0	Level	Aus ATC (ADS-B)
Sun 03:23:04 PM	-37.9124	148.4054	→ 102°	582.0	670.0	41000.0	Level	Aus ATC (ADS-B)
Sun 03:23:15 PM	-37.919	148.4441	→ 102°	582.0	670.0	41000.0	Level	Aus ATC (ADS-B)
Sun 03:23:25 PM	-37.9246	148.4771	→ 102°	582.0	670.0	41000.0	Level	Aus ATC (ADS-B)
Sun 03:23:34 PM	-37.9299	148.5078	→ 102°	582.0	670.0	41000.0	Level	FlightAware ADS-B (MBW / YMMB)
Sun 03:23:35 PM	-37.9303	148.5102	→ 102°	582.0	670.0	41000.0	Level	Aus ATC (ADS-B)
Sun 03:23:40 PM	-37.9332	148.527	→ 102°	582.0	670.0	41000.0	Level	Aus ATC (ADS-B)
Sun 03:23:50 PM	-37.9388	148.5602	→ 102°	582.0	670.0	41000.0	Level	Aus ATC (ADS-B)
Sun 03:24:05 PM	-37.9473	148.6102	→ 102°	582.0	670.0	41000.0	Level	FlightAware ADS-B (YDPO)
Sun 03:24:30 PM	-37.9612	148.693	→ 102°	581.0	669.0	41000.0	Level	Aus ATC (ADS-B)
Sun 03:24:35 PM	-37.964	148.7092	→ 102°	581.0	669.0	41000.0	Level	Aus ATC (ADS-B)
Sun 03:24:40 PM	-37.9668	148.726	→ 102°	580.0	667.0	41000.0	Level	Aus ATC (ADS-B)
Sun 03:24:45 PM	-37.9695	148.7424	→ 102°	580.0	667.0	41000.0	Level	Aus ATC (ADS-B)
Sun 03:24:55 PM	-37.9751	148.7755	→ 102°	580.0	667.0	41000.0	Level	Aus ATC (ADS-B)
Sun 03:25:05 PM	-37.9809	148.8102	→ 102°	580.0	667.0	41000.0	Level	FlightAware ADS-B (YTDN)
Sun 03:25:20 PM	-37.9889	148.8581	→ 102°	578.0	665.0	41000.0	Level	Aus ATC (ADS-B)
Sun 03:25:30 PM	-37.9944	148.8911	→ 102°	578.0	665.0	41000.0	Level	Aus ATC (ADS-B)
Sun 03:25:37 PM	-37.9981	148.9131	→ 102°	579.0	666.0	41000.0	Level	FlightAware ADS-B (BSJ / YBNS)
Sun 03:25:40 PM	-37.9999	148.9244	→ 102°	579.0	666.0	41000.0	Level	Aus ATC (ADS-B)
Sun 03:25:45 PM	-38.0027	148.9408	→ 101°	579.0	666.0	41000.0	Level	Aus ATC (ADS-B)
Sun 03:25:55 PM	-38.0082	148.974	→ 102°	579.0	666.0	41000.0	Level	Aus ATC (ADS-B)
Sun 03:26:05 PM	-38.0137	149.0071	→ 102°	579.0	666.0	41000.0	Level	Aus ATC (ADS-B)
Sun 03:26:07 PM	-38.0147	149.0129	→ 102°	579.0	666.0	41000.0	Level	FlightAware ADS-B (BSJ / YBNS)
Sun 03:26:10 PM	-38.0164	149.0234	→ 102°	579.0	666.0	41000.0	Level	Aus ATC (ADS-B)
Sun 03:26:15 PM	-38.0191	149.0399	→ 101°	579.0	666.0	41000.0	Level	Aus ATC (ADS-B)
Sun 03:26:20 PM	-38.0219	149.0567	→ 102°	579.0	666.0	41000.0	Level	Aus ATC (ADS-B)
Sun 03:26:30 PM	-38.0273	149.0897	→ 102°	580.0	667.0	41000.0	Level	Aus ATC (ADS-B)
Sun 03:26:35 PM	-38.0301	149.1064	→ 102°	580.0	667.0	41000.0	Level	Aus ATC (ADS-B)
Sun 03:26:40 PM	-38.0328	149.123	→ 101°	580.0	667.0	41000.0	Level	Aus ATC (ADS-B)
Sun 03:26:45 PM	-38.0355	149.1396	→ 102°	580.0	667.0	41000.0	Level	Aus ATC (ADS-B)
Sun 03:27:07 PM	-38.0476	149.2131	→ 102°	580.0	667.0	41000.0	Level	FlightAware ADS-B (BSJ / YBNS)
Sun 03:27:25 PM	-38.0572	149.2722	→ 102°	581.0	669.0	41000.0	Level	Aus ATC (ADS-B)
Sun 03:27:35 PM	-38.0626	149.3054	→ 102°	581.0	669.0	41000.0	Level	Aus ATC (ADS-B)
Sun 03:27:42 PM	-38.066	149.3262	→ 102°	581.0	669.0	41000.0	Level	FlightAware ADS-B (BWT / YWYY)
Sun 03:27:50 PM	-38.0707	149.3551	→ 102°	581.0	669.0	41000.0	Level	Aus ATC (ADS-B)
Sun 03:28:00 PM	-38.0761	149.3884	→ 102°	581.0	669.0	41000.0	Level	Aus ATC (ADS-B)
Sun 03:28:10 PM	-38.0816	149.4217	→ 102°	581.0	669.0	41000.0	Level	Aus ATC (ADS-B)
Sun 03:28:15 PM	-38.0842	149.4383	→ 102°	581.0	669.0	41000.0	Level	Aus ATC (ADS-B)
Sun 03:28:20 PM	-38.0869	149.4551	→ 101°	581.0	669.0	41000.0	Level	Aus ATC (ADS-B)
Sun 03:28:30 PM	-38.0923	149.4883	→ 102°	581.0	669.0	41000.0	Level	Aus ATC (ADS-B)
Sun 03:28:35 PM	-38.0949	149.505	→ 101°	581.0	669.0	41000.0	Level	Aus ATC (ADS-B)
Sun 03:28:40 PM	-38.0976	149.5214	→ 102°	581.0	669.0	41000.0	Level	Aus ATC (ADS-B)
Sun 03:28:45 PM	-38.1002	149.5381	→ 101°	581.0	669.0	41000.0	Level	Aus ATC (ADS-B)
Sun 03:28:55 PM	-38.1056	149.5713	→ 102°	581.0	669.0	41000.0	-38 Descending	Aus ATC (ADS-B)
Sun 03:29:25 PM	-38.1219	149.6731	→ 101°	581.0	669.0	40975.0	Level	FlightAware ADS-B (YMIG)
Sun 03:29:55 PM	-38.1373	149.7708	→ 101°	579.0	666.0	41000.0	43 Climbing	Aus ATC (ADS-B)
Sun 03:30:00 PM	-38.14	149.7875	→ 102°	579.0	666.0	41000.0	Level	Aus ATC (ADS-B)
Sun 03:30:05 PM	-38.1426	149.804	→ 101°	579.0	666.0	41000.0	Level	Aus ATC (ADS-B)
Sun 03:30:10 PM	-38.1452	149.8205	→ 101°	579.0	666.0	41000.0	-75 Descending	Aus ATC (ADS-B)
Sun 03:30:25 PM	-38.1541	149.8769	→ 101°	580.0	667.0	40975.0	Level	FlightAware ADS-B (YMIG)
Sun 03:30:44 PM	-38.1637	149.9373	→ 101°	581.0	669.0	41000.0	63 Climbing	Aus ATC (ADS-B)
Sun 03:30:49 PM	-38.1662	149.9539	→ 101°	581.0	669.0	41000.0	Level	Aus ATC (ADS-B)
Sun 03:30:55 PM	-38.1693	149.9737	→ 101°	581.0	669.0	41000.0	Level	FlightAware ADS-B (YDPO)
Sun 03:30:59 PM	-38.1715	149.9873	→ 102°	581.0	669.0	41000.0	Level	Aus ATC (ADS-B)
Sun 03:31:09 PM	-38.1767	150.0204	→ 101°	580.0	667.0	41000.0	Level	Aus ATC (ADS-B)
Sun 03:31:14 PM	-38.1793	150.0372	→ 101°	580.0	667.0	41000.0	Level	Aus ATC (ADS-B)
Sun 03:31:24 PM	-38.1845	150.0705	→ 101°	579.0	666.0	41000.0	Level	Aus ATC (ADS-B)
Sun 03:31:25 PM	-38.1849	150.0733	→ 101°	579.0	666.0	41000.0	Level	FlightAware ADS-B (YDPO)
Sun 03:31:34 PM	-38.1897	150.1037	→ 101°	579.0	666.0	41000.0	Level	Aus ATC (ADS-B)
Sun 03:31:49 PM	-38.1974	150.1534	→ 101°	579.0	666.0	41000.0	Level	Aus ATC (ADS-B)
Sun 03:31:55 PM	-38.2005	150.1738	→ 101°	579.0	666.0	41000.0	Level	FlightAware ADS-B (YDPO)
Sun 03:32:34 PM	-38.2194	150.3029	→ 101°	578.0	665.0	41000.0	Level	Aus ATC (ADS-B)
Sun 03:32:39 PM	-38.2214	150.3199	→ 99°	578.0	665.0	41000.0	Level	Aus ATC (ADS-B)
Sun 03:32:44 PM	-38.2233	150.3364	→ 99°	578.0	665.0	41000.0	Level	Aus ATC (ADS-B)
Sun 03:33:26 PM	-38.2363	150.4787	→ 96°	578.0	665.0	41000.0	-21 Descending	FlightAware ADS-B (SXE / YMES)
Sun 03:33:57 PM	-38.2445	150.5801	→ 96°	578.0	665.0	40975.0	Level	FlightAware ADS-B (SXE / YMES)
Sun 03:34:04 PM	-38.2466	150.6055	→ 96°	578.0	665.0	41000.0	125 Climbing	Aus ATC (ADS-B)
Sun 03:34:09 PM	-38.248	150.6226	→ 96°	578.0	665.0	41000.0	Level	Aus ATC (ADS-B)
Sun 03:34:14 PM	-38.2493	150.6393	→ 96°	577.0	664.0	41000.0	Level	Aus ATC (ADS-B)
Sun 03:34:19 PM	-38.2507	150.6561	→ 96°	577.0	664.0	41000.0	Level	Aus ATC (ADS-B)
Sun 03:34:29 PM	-38.2533	150.6887	→ 96°	577.0	664.0	41000.0	Level	Aus ATC (ADS-B)
Sun 03:34:34 PM	-38.2546	150.7054	→ 96°	576.0	663.0	41000.0	Level	Aus ATC (ADS-B)
Sun 03:34:39 PM	-38.256	150.7221	→ 96°	576.0	663.0	41000.0	Level	Aus ATC (ADS-B)
Sun 03:34:44 PM	-38.2572	150.7387	→ 95°	575.0	662.0	41000.0	Level	Aus ATC (ADS-B)
Sun 03:34:49 PM	-38.2586	150.7555	→ 96°	575.0	662.0	41000.0	Level	Aus ATC (ADS-B)
Sun 03:34:59 PM	-38.2613	150.7891	→ 96°	574.0	661.0	41000.0	Level	Aus ATC (ADS-B)
Sun 03:35:08 PM	-38.2636	150.8181	→ 96°	574.0	661.0	41000.0	Level	FlightAware ADS-B (SXE / YMES)
Sun 03:35:09 PM	-38.2639	150.8226	→ 96°	574.0	661.0	41000.0	Level	Aus ATC (ADS-B)
Sun 03:35:14 PM	-38.2652	150.8392	→ 96°	574.0	661.0	41000.0	Level	Aus ATC (ADS-B)
Sun 03:35:24 PM	-38.2678	150.8728	→ 96°	574.0	661.0	41000.0	Level	Aus ATC (ADS-B)
Sun 03:35:34 PM	-38.2704	150.906	→ 96°	574.0	661.0	41000.0	-94 Descending	Aus ATC (ADS-B)
Sun 03:35:40 PM	-38.2719	150.9253	→ 96°	574.0	661.0	40975.0	Level	FlightAware ADS-B (SXE / YMES)
Sun 03:35:49 PM	-38.2743	150.9563	→ 96°	574.0	661.0	41000.0	79 Climbing	Aus ATC (ADS-B)
Sun 03:35:59 PM	-38.2769	150.9896	→ 96°	574.0	661.0	41000.0	Level	Aus ATC (ADS-B)
Sun 03:36:09 PM	-38.2794	151.0232	→ 96°	574.0	661.0	41000.0	Level	Aus ATC (ADS-B)
Sun 03:36:13 PM	-38.2804	151.0351	→ 96°	574.0	661.0	41000.0	-44 Descending	FlightAware ADS-B (SXE / YMES)
Sun 03:36:43 PM	-38.2881	151.1374	→ 95°	571.0	657.0	40975.0	Level	FlightAware ADS-B (SXE / YMES)
Sun 03:36:44 PM	-38.2883	151.14	→ 95°	571.0	657.0	41000.0	250 Climbing	Aus ATC (ADS-B)
Sun 03:36:49 PM	-38.2896	151.1566	→ 96°	571.0	657.0	41000.0	Level	Aus ATC (ADS-B)
Sun 03:36:54 PM	-38.2908	151.1731	→ 95°	570.0	656.0	41000.0	Level	Aus ATC (ADS-B)
Sun 03:37:04 PM	-38.2934	151.2065	→ 96°	569.0	655.0	41000.0	Level	Aus ATC (ADS-B)
Sun 03:37:09 PM	-38.2947	151.223	→ 95°	569.0	655.0	41000.0	Level	Aus ATC (ADS-B)
Sun 03:37:14 PM	-38.2959	151.2396	→ 95°	568.0	654.0	41000.0	Level	Aus ATC (ADS-B)
Sun 03:37:18 PM	-38.2971	151.2561	→ 96°	568.0	654.0	41000.0	300 Climbing	Aus ATC (ADS-B)
Sun 03:37:19 PM	-38.2967	151.2504	→ 95°	567.0	652.0	41025.0	Level	FlightAware ADS-B (YTCN)
Sun 03:37:28 PM	-38.2996	151.289	→ 95°	566.0	651.0	41000.0	-79 Descending	Aus ATC (ADS-B)
Sun 03:37:38 PM	-38.302	151.3219	→ 95°	564.0	649.0	41000.0	Level	Aus ATC (ADS-B)
Sun 03:37:53 PM	-38.3056	151.3712	→ 95°	563.0	648.0	41000.0	Level	Aus ATC (ADS-B)
Sun 03:37:55 PM	-38.3059	151.3757	→ 95°	563.0	648.0	41000.0	Level	FlightAware ADS-B (YRAY)
Sun 03:38:03 PM	-38.308	151.4041	→ 95°	563.0	648.0	41000.0	Level	Aus ATC (ADS-B)
Sun 03:38:08 PM	-38.3092	151.4207	→ 95°	563.0	648.0	41000.0	Level	Aus ATC (ADS-B)
Sun 03:38:13 PM	-38.3104	151.4369	→ 96°	563.0	648.0	41000.0	Level	Aus ATC (ADS-B)
Sun 03:38:33 PM	-38.3148	151.4958	→ 95°	563.0	648.0	41000.0	Level	FlightAware ADS-B (YTCN)
Sun 03:38:48 PM	-38.3188	151.5517	→ 95°	561.0	646.0	41000.0	Level	Aus ATC (ADS-B)
Sun 03:38:58 PM	-38.3211	151.5845	→ 95°	560.0	644.0	41000.0	Level	Aus ATC (ADS-B)
Sun 03:39:03 PM	-38.3223	151.6007	→ 96°	559.0	643.0	41000.0	Level	Aus ATC (ADS-B)
Sun 03:39:08 PM	-38.3235	151.6173	→ 95°	559.0	643.0	41000.0	Level	Aus ATC (ADS-B)
Sun 03:39:13 PM	-38.3246	151.6336	→ 95°	559.0	643.0	41000.0	Level	Aus ATC (ADS-B)
Sun 03:39:23 PM	-38.3269	151.6662	→ 95°	558.0	642.0	41000.0	Level	Aus ATC (ADS-B)
Sun 03:39:33 PM	-38.3292	151.6985	→ 95°	558.0	642.0	41000.0	Level	Aus ATC (ADS-B)
Sun 03:39:48 PM	-38.3327	151.7475	→ 95°	557.0	641.0	41000.0	Level	Aus ATC (ADS-B)
Sun 03:39:58 PM	-38.335	151.78	→ 95°	557.0	641.0	41000.0	Level	Aus ATC (ADS-B)
Sun 03:40:08 PM	-38.3372	151.8126	→ 95°	557.0	641.0	41000.0	Level	Aus ATC (ADS-B)
Sun 03:40:13 PM	-38.3384	151.829	→ 95°	557.0	641.0	41000.0	Level	Aus ATC (ADS-B)
Sun 03:40:23 PM	-38.3405	151.8612	→ 95°	557.0	641.0	41000.0	Level	Aus ATC (ADS-B)
Sun 03:40:28 PM	-38.3416	151.8777	→ 95°	557.0	641.0	41000.0	Level	Aus ATC (ADS-B)
Sun 03:40:33 PM	-38.3428	151.8938	→ 95°	557.0	641.0	41000.0	Level	Aus ATC (ADS-B)
Sun 03:40:38 PM	-38.3439	151.9103	→ 95°	556.0	640.0	41000.0	Level	Aus ATC (ADS-B)
Sun 03:40:39 PM	-38.3441	151.9128	→ 95°	557.0	641.0	41000.0	Level	FlightAware ADS-B (YRAY)
Sun 03:40:43 PM	-38.3451	151.9266	→ 95°	556.0	640.0	41000.0	Level	Aus ATC (ADS-B)
Sun 03:40:53 PM	-38.3473	151.9589	→ 95°	557.0	641.0	41000.0	Level	Aus ATC (ADS-B)
Sun 03:41:03 PM	-38.3495	151.9913	→ 95°	557.0	641.0	41000.0	Level	Aus ATC (ADS-B)
Sun 03:41:08 PM	-38.3506	152.0078	→ 95°	557.0	641.0	41000.0	Level	Aus ATC (ADS-B)
Sun 03:41:11 PM	-38.3513	152.0164	→ 95°	557.0	641.0	41000.0	Level	FlightAware ADS-B (YRAY)
Sun 03:41:18 PM	-38.3528	152.0401	→ 95°	557.0	641.0	41000.0	Level	Aus ATC (ADS-B)
Sun 03:41:28 PM	-38.3551	152.0728	→ 95°	558.0	642.0	41000.0	Level	Aus ATC (ADS-B)
Sun 03:41:43 PM	-38.3584	152.1218	→ 95°	558.0	642.0	41000.0	Level	Aus ATC (ADS-B)
Sun 03:41:49 PM	-38.3595	152.1384	→ 95°	559.0	643.0	41000.0	Level	FlightAware ADS-B (YTCN)
Sun 03:41:53 PM	-38.3606	152.1546	→ 95°	559.0	643.0	41000.0	Level	Aus ATC (ADS-B)
Sun 03:42:03 PM	-38.3628	152.1869	→ 95°	559.0	643.0	41000.0	Level	Aus ATC (ADS-B)
Sun 03:42:08 PM	-38.3639	152.2033	→ 95°	559.0	643.0	41000.0	Level	Aus ATC (ADS-B)
Sun 03:42:13 PM	-38.365	152.2197	→ 95°	559.0	643.0	41000.0	Level	Aus ATC (ADS-B)
Sun 03:42:18 PM	-38.3661	152.2362	→ 95°	560.0	644.0	41000.0	Level	Aus ATC (ADS-B)
Sun 03:42:28 PM	-38.3682	152.2688	→ 95°	560.0	644.0	41000.0	Level	Aus ATC (ADS-B)
Sun 03:42:33 PM	-38.3693	152.2853	→ 95°	560.0	644.0	41000.0	Level	Aus ATC (ADS-B)
Sun 03:42:38 PM	-38.3704	152.3014	→ 95°	560.0	644.0	41000.0	Level	Aus ATC (ADS-B)
Sun 03:42:43 PM	-38.3715	152.3179	→ 95°	560.0	644.0	41000.0	Level	Aus ATC (ADS-B)
Sun 03:42:48 PM	-38.3725	152.3343	→ 95°	560.0	644.0	41000.0	Level	Aus ATC (ADS-B)
Sun 03:42:49 PM	-38.3725	152.3336	→ 95°	560.0	644.0	41000.0	Level	FlightAware ADS-B (YTCN)
Sun 03:42:58 PM	-38.3747	152.3669	→ 95°	560.0	644.0	41000.0	Level	Aus ATC (ADS-B)
Sun 03:43:08 PM	-38.3768	152.3996	→ 95°	560.0	644.0	41000.0	Level	Aus ATC (ADS-B)
Sun 03:43:13 PM	-38.3779	152.4161	→ 95°	560.0	644.0	41000.0	Level	Aus ATC (ADS-B)
Sun 03:43:23 PM	-38.38	152.4486	→ 95°	560.0	644.0	41000.0	Level	Aus ATC (ADS-B)
Sun 03:43:33 PM	-38.3821	152.4815	→ 95°	560.0	644.0	41000.0	Level	Aus ATC (ADS-B)
Sun 03:43:48 PM	-38.3852	152.5306	→ 95°	560.0	644.0	41000.0	Level	Aus ATC (ADS-B)
Sun 03:43:58 PM	-38.3873	152.5631	→ 95°	559.0	643.0	41000.0	Level	Aus ATC (ADS-B)
Sun 03:44:08 PM	-38.3894	152.596	→ 95°	559.0	643.0	41000.0	Level	Aus ATC (ADS-B)
Sun 03:44:13 PM	-38.3904	152.6122	→ 94°	559.0	643.0	41000.0	Level	Aus ATC (ADS-B)
Sun 03:44:18 PM	-38.3915	152.6284	→ 95°	558.0	642.0	41000.0	Level	Aus ATC (ADS-B)
Sun 03:44:23 PM	-38.3925	152.6449	→ 94°	558.0	642.0	41000.0	Level	Aus ATC (ADS-B)
Sun 03:44:33 PM	-38.3945	152.6775	→ 95°	557.0	641.0	41000.0	Level	Aus ATC (ADS-B)
Sun 03:44:38 PM	-38.3956	152.6938	→ 95°	557.0	641.0	41000.0	Level	Aus ATC (ADS-B)
Sun 03:44:43 PM	-38.3966	152.71	→ 94°	556.0	640.0	41000.0	Level	Aus ATC (ADS-B)
Sun 03:44:48 PM	-38.3976	152.7262	→ 94°	556.0	640.0	41000.0	Level	Aus ATC (ADS-B)
Sun 03:44:53 PM	-38.3985	152.7423	→ 94°	556.0	640.0	41000.0	Level	Aus ATC (ADS-B)
Sun 03:44:55 PM	-38.3989	152.7497	→ 94°	556.0	640.0	41000.0	Level	FlightAware ADS-B (YRAY)
Sun 03:45:03 PM	-38.4005	152.7748	→ 95°	555.0	639.0	41000.0	Level	Aus ATC (ADS-B)
Sun 03:45:08 PM	-38.4015	152.7911	→ 95°	555.0	639.0	41000.0	Level	Aus ATC (ADS-B)
Sun 03:45:13 PM	-38.4025	152.8074	→ 95°	554.0	638.0	41000.0	Level	Aus ATC (ADS-B)
Sun 03:45:18 PM	-38.4035	152.8236	→ 94°	554.0	638.0	41000.0	Level	Aus ATC (ADS-B)
Sun 03:45:28 PM	-38.4055	152.856	→ 95°	554.0	638.0	41000.0	Level	Aus ATC (ADS-B)
Sun 03:45:38 PM	-38.4075	152.8884	→ 95°	553.0	636.0	41000.0	Level	Aus ATC (ADS-B)
Sun 03:45:53 PM	-38.4104	152.9369	→ 94°	552.0	635.0	41000.0	-240 Descending	Aus ATC (ADS-B)
Sun 03:46:03 PM	-38.4123	152.969	→ 94°	551.0	634.0	40900.0	Level	Aus ATC (ADS-B)
Sun 03:46:13 PM	-38.4143	153.0011	→ 94°	551.0	634.0	41000.0	400 Climbing	Aus ATC (ADS-B)
Sun 03:46:18 PM	-38.4152	153.0174	→ 94°	550.0	633.0	41000.0	Level	Aus ATC (ADS-B)
Sun 03:46:28 PM	-38.4171	153.0494	→ 94°	550.0	633.0	41000.0	Level	Aus ATC (ADS-B)
Sun 03:46:38 PM	-38.419	153.0815	→ 94°	550.0	633.0	41000.0	Level	Aus ATC (ADS-B)
Sun 03:46:43 PM	-38.4199	153.0975	→ 94°	550.0	633.0	41000.0	Level	Aus ATC (ADS-B)
Sun 03:46:48 PM	-38.4208	153.1136	→ 94°	548.0	631.0	41000.0	Level	Aus ATC (ADS-B)
Sun 03:46:58 PM	-38.4226	153.1457	→ 94°	548.0	631.0	41000.0	Level	Aus ATC (ADS-B)
Sun 03:47:08 PM	-38.4245	153.178	→ 94°	548.0	631.0	41000.0	Level	Aus ATC (ADS-B)
Sun 03:47:13 PM	-38.4254	153.1942	→ 94°	548.0	631.0	41000.0	Level	Aus ATC (ADS-B)
Sun 03:47:18 PM	-38.4264	153.2102	→ 95°	548.0	631.0	41000.0	Level	Aus ATC (ADS-B)
Sun 03:47:23 PM	-38.4273	153.2261	→ 94°	548.0	631.0	41000.0	Level	Aus ATC (ADS-B)
Sun 03:47:33 PM	-38.4292	153.2582	→ 94°	549.0	632.0	41000.0	Level	Aus ATC (ADS-B)
Sun 03:47:42 PM	-38.431	153.2903	→ 94°	550.0	633.0	41000.0	Level	Aus ATC (ADS-B)
Sun 03:47:57 PM	-38.4338	153.3385	→ 94°	550.0	633.0	41000.0	Level	Aus ATC (ADS-B)
Sun 03:48:07 PM	-38.4356	153.3709	→ 94°	549.0	632.0	41000.0	Level	Aus ATC (ADS-B)
Sun 03:48:17 PM	-38.4374	153.403	→ 94°	549.0	632.0	41000.0	Level	Aus ATC (ADS-B)
Sun 03:48:22 PM	-38.4383	153.419	→ 94°	549.0	632.0	41000.0	Level	Aus ATC (ADS-B)
Sun 03:48:32 PM	-38.4401	153.4512	→ 94°	549.0	632.0	41000.0	Level	Aus ATC (ADS-B)
Sun 03:48:42 PM	-38.4419	153.4834	→ 94°	550.0	633.0	41000.0	Level	Aus ATC (ADS-B)
Sun 03:48:47 PM	-38.4428	153.4994	→ 94°	548.0	631.0	41000.0	Level	Aus ATC (ADS-B)
Sun 03:48:52 PM	-38.4437	153.5154	→ 94°	548.0	631.0	41000.0	Level	Aus ATC (ADS-B)
Sun 03:48:57 PM	-38.4446	153.5316	→ 94°	548.0	631.0	41000.0	Level	Aus ATC (ADS-B)
Sun 03:49:07 PM	-38.4464	153.5636	→ 94°	548.0	631.0	41000.0	Level	Aus ATC (ADS-B)
Sun 03:49:12 PM	-38.4472	153.5799	→ 94°	548.0	631.0	41000.0	Level	Aus ATC (ADS-B)
Sun 03:49:17 PM	-38.4481	153.5957	→ 94°	548.0	631.0	41000.0	Level	Aus ATC (ADS-B)
Sun 03:49:52 PM	-38.4541	153.7079	→ 94°	546.0	628.0	41000.0	Level	Aus ATC (ADS-B)
Sun 03:50:02 PM	-38.4558	153.7398	→ 94°	545.0	627.0	41000.0	Level	Aus ATC (ADS-B)
Sun 03:50:12 PM	-38.4575	153.7717	→ 94°	545.0	627.0	41000.0	Level	Aus ATC (ADS-B)
Sun 03:50:22 PM	-38.4592	153.8039	→ 94°	544.0	626.0	41000.0	Level	Aus ATC (ADS-B)
Sun 03:50:27 PM	-38.46	153.8198	→ 94°	544.0	626.0	41000.0	Level	Aus ATC (ADS-B)
Sun 03:50:37 PM	-38.4617	153.8516	→ 94°	544.0	626.0	41000.0	Level	Aus ATC (ADS-B)
Sun 03:50:47 PM	-38.4634	153.8835	→ 94°	543.0	625.0	41000.0	Level	Aus ATC (ADS-B)
Sun 03:50:52 PM	-38.4641	153.8993	→ 93°	543.0	625.0	41000.0	Level	Aus ATC (ADS-B)
Sun 03:50:57 PM	-38.465	153.9152	→ 94°	542.0	624.0	41000.0	Level	Aus ATC (ADS-B)
Sun 03:51:02 PM	-38.4658	153.9311	→ 94°	542.0	624.0	41000.0	Level	Aus ATC (ADS-B)
Sun 03:51:12 PM	-38.4674	153.9629	→ 94°	541.0	623.0	41000.0	Level	Aus ATC (ADS-B)
Sun 03:51:22 PM	-38.469	153.9946	→ 94°	541.0	623.0	41000.0	Level	Aus ATC (ADS-B)
Sun 03:51:27 PM	-38.4698	154.0103	→ 94°	541.0	623.0	41000.0	Level	Aus ATC (ADS-B)
Sun 03:51:32 PM	-38.4706	154.0261	→ 94°	541.0	623.0	41000.0	Level	Aus ATC (ADS-B)
Sun 03:51:37 PM	-38.4714	154.0421	→ 94°	541.0	623.0	41000.0	Level	Aus ATC (ADS-B)
Sun 03:51:42 PM	-38.4722	154.0578	→ 94°	541.0	623.0	41000.0	Level	Aus ATC (ADS-B)
Sun 03:51:52 PM	-38.4738	154.0893	→ 94°	541.0	623.0	41000.0	Level	Aus ATC (ADS-B)
Sun 03:51:57 PM	-38.4747	154.1057	→ 94°	541.0	623.0	41000.0	Level	Aus ATC (ADS-B)
Sun 03:52:02 PM	-38.4754	154.1213	→ 94°	541.0	623.0	41000.0	Level	Aus ATC (ADS-B)
Sun 03:52:07 PM	-38.4762	154.1368	→ 94°	541.0	623.0	41000.0	Level	Aus ATC (ADS-B)
Sun 03:52:17 PM	-38.4777	154.1685	→ 93°	541.0	623.0	41000.0	Level	Aus ATC (ADS-B)
Sun 03:52:27 PM	-38.4784	154.184	→ 93°	541.0	623.0	41000.0	Level	Aus ATC (ADS-B)
Sun 03:52:42 PM	-38.4817	154.2486	→ 94°	543.0	625.0	41000.0	Level	Aus ATC (ADS-B)
Sun 03:52:52 PM	-38.4833	154.2802	→ 94°	543.0	625.0	41000.0	Level	Aus ATC (ADS-B)
Sun 03:53:02 PM	-38.4848	154.3114	→ 93°	543.0	625.0	41000.0	Level	Aus ATC (ADS-B)
Sun 03:53:07 PM	-38.4856	154.3279	→ 93°	543.0	625.0	41000.0	Level	Aus ATC (ADS-B)
Sun 03:53:32 PM	-38.4893	154.4073	→ 93°	543.0	625.0	41000.0	Level	Aus ATC (ADS-B)
Sun 03:53:37 PM	-38.49	154.4229	→ 93°	543.0	625.0	41000.0	Level	Aus ATC (ADS-B)
Sun 03:53:42 PM	-38.4907	154.4385	→ 93°	543.0	625.0	41000.0	Level	Aus ATC (ADS-B)
Sun 05:15:19 PM	-38.2272	169.5271	→ 84°	501.0	577.0	41000.0	Level	FlightAware ADS-B (NZPI)
Sun 05:16:19 PM	-38.2127	169.7011	→ 84°	501.0	577.0	41000.0	Level	FlightAware ADS-B (NZPI)
Sun 05:18:21 PM	-38.1827	170.0521	→ 84°	496.0	571.0	41000.0	Level	FlightAware ADS-B (NZRW)
Sun 05:19:00 PM	-38.1727	170.1672	→ 84°	496.0	571.0	40975.0	Level	FlightAware ADS-B (NZRW)
Sun 05:19:36 PM	-38.1637	170.2693	→ 84°	497.0	572.0	41000.0	20 Climbing	FlightAware ADS-B (AKL / NZAA)
Sun 05:20:16 PM	-38.1532	170.386	→ 84°	497.0	572.0	41000.0	Level	FlightAware ADS-B (AKL / NZAA)
Sun 05:20:46 PM	-38.1453	170.474	→ 83°	495.0	570.0	41000.0	Level	FlightAware ADS-B (AKL / NZAA)
Sun 05:21:18 PM	-38.1371	170.5644	→ 83°	494.0	568.0	41000.0	Level	FlightAware ADS-B (PPQ / NZPP)
Sun 05:21:48 PM	-38.1291	170.6514	→ 83°	493.0	567.0	41000.0	Level	FlightAware ADS-B (NZPI)
Sun 05:22:21 PM	-38.1201	170.7479	→ 83°	492.0	566.0	41000.0	-22 Descending	FlightAware ADS-B (AKL / NZAA)
Sun 05:22:56 PM	-38.1096	170.847	→ 80°	492.0	566.0	40975.0	-23 Descending	FlightAware ADS-B (AKL / NZAA)
Sun 05:23:26 PM	-38.0954	170.9318	→ 76°	493.0	567.0	40975.0	24 Climbing	FlightAware ADS-B (AKL / NZAA)
Sun 05:23:58 PM	-38.0775	171.0215	→ 76°	493.0	567.0	41000.0	Level	FlightAware ADS-B (AKL / NZAA)
Sun 05:24:29 PM	-38.0608	171.106	→ 76°	494.0	568.0	40975.0	-25 Descending	FlightAware ADS-B (AKL / NZAA)
Sun 05:24:59 PM	-38.0439	171.1911	→ 76°	496.0	571.0	40975.0	Level	FlightAware ADS-B (AKL / NZAA)
Sun 05:25:34 PM	-38.0244	171.2886	→ 76°	495.0	570.0	40975.0	21 Climbing	FlightAware ADS-B (AMZ / NZAR)
Sun 05:26:09 PM	-38.0039	171.3909	→ 76°	493.0	567.0	41000.0	23 Climbing	FlightAware ADS-B (PPQ / NZPP)
Sun 05:26:39 PM	-37.9871	171.4744	→ 76°	492.0	566.0	41000.0	Level	FlightAware ADS-B (PPQ / NZPP)
Sun 05:27:17 PM	-37.966	171.5785	→ 76°	493.0	567.0	41000.0	Level	FlightAware ADS-B (NZME)
Sun 05:27:49 PM	-37.9475	171.669	→ 76°	492.0	566.0	41000.0	Level	FlightAware ADS-B (PPQ / NZPP)
Sun 05:28:20 PM	-37.9302	171.7539	→ 76°	491.0	565.0	41000.0	Level	FlightAware ADS-B (PPQ / NZPP)
Sun 05:28:54 PM	-37.9102	171.8507	→ 76°	492.0	566.0	41000.0	-22 Descending	FlightAware ADS-B (NZPI)
Sun 05:29:27 PM	-37.8922	171.9387	→ 75°	492.0	566.0	40975.0	-23 Descending	FlightAware ADS-B (AKL / NZAA)
Sun 05:30:00 PM	-37.8728	172.0325	→ 75°	491.0	565.0	40975.0	24 Climbing	FlightAware ADS-B (PPQ / NZPP)
Sun 05:30:30 PM	-37.8556	172.1147	→ 75°	490.0	564.0	41000.0	25 Climbing	FlightAware ADS-B (ROT / NZRO)
Sun 05:31:00 PM	-37.8382	172.1983	→ 75°	489.0	563.0	41000.0	-25 Descending	FlightAware ADS-B (PPQ / NZPP)
Sun 05:31:30 PM	-37.821	172.2805	→ 75°	489.0	563.0	40975.0	Level	FlightAware ADS-B (PPQ / NZPP)
Sun 05:32:00 PM	-37.8037	172.3628	→ 75°	488.0	562.0	41000.0	25 Climbing	FlightAware ADS-B (NZJQ)
Sun 05:32:31 PM	-37.7866	172.4436	→ 75°	487.0	560.0	41000.0	-24 Descending	FlightAware ADS-B (PMR / NZPM)
Sun 05:33:02 PM	-37.7674	172.5343	→ 75°	487.0	560.0	40975.0	-73 Descending	FlightAware ADS-B (NZPI)
Sun 05:33:33 PM	-37.7498	172.617	→ 75°	487.0	560.0	40925.0	-934 Descending	FlightAware ADS-B (ROT / NZRO)
Sun 05:34:03 PM	-37.7324	172.6987	→ 75°	483.0	556.0	40025.0	-2,125 Descending	FlightAware ADS-B (ROT / NZRO)
Sun 05:34:33 PM	-37.715	172.7799	→ 75°	483.0	556.0	38800.0	-2,508 Descending	FlightAware ADS-B (ROT / NZRO)
Sun 05:35:04 PM	-37.6963	172.8665	→ 75°	484.0	557.0	37475.0	-2,659 Descending	FlightAware ADS-B (NZJM)
Sun 05:35:39 PM	-37.6757	172.9619	→ 75°	485.0	558.0	35875.0	-2,446 Descending	FlightAware ADS-B (NZWP)
Sun 05:36:09 PM	-37.6576	173.0446	→ 75°	486.0	559.0	34825.0	-2,095 Descending	FlightAware ADS-B (NZPI)
Sun 05:36:42 PM	-37.6392	173.1295	→ 75°	482.0	555.0	33675.0	-2,119 Descending	FlightAware ADS-B (AKL / NZAA)
Sun 05:37:12 PM	-37.6217	173.2099	→ 75°	477.0	549.0	32600.0	-2,200 Descending	FlightAware ADS-B (AKL / NZAA)
Sun 05:37:42 PM	-37.6041	173.2906	→ 75°	473.0	544.0	31475.0	-2,200 Descending	FlightAware ADS-B (NZME)
Sun 05:38:12 PM	-37.5866	173.3698	→ 75°	468.0	539.0	30400.0	-2,175 Descending	FlightAware ADS-B (AKL / NZAA)
Sun 05:38:42 PM	-37.5688	173.4504	→ 75°	467.0	537.0	29300.0	-2,200 Descending	FlightAware ADS-B (AKL / NZAA)
Sun 05:39:12 PM	-37.5515	173.5282	→ 74°	465.0	535.0	28200.0	-2,175 Descending	FlightAware ADS-B (AKL / NZAA)
Sun 05:39:42 PM	-37.5349	173.6031	→ 74°	462.0	532.0	27125.0	-2,175 Descending	FlightAware ADS-B (NZPI)
Sun 05:40:12 PM	-37.5176	173.6802	→ 74°	459.0	528.0	26025.0	-2,275 Descending	FlightAware ADS-B
Sun 05:40:42 PM	-37.4999	173.759	→ 74°	457.0	526.0	24850.0	-2,325 Descending	FlightAware ADS-B
Sun 05:41:12 PM	-37.4822	173.8375	→ 74°	455.0	524.0	23700.0	-2,300 Descending	FlightAware ADS-B (NZPK)
Sun 05:41:42 PM	-37.4653	173.9133	→ 74°	450.0	518.0	22550.0	-2,300 Descending	FlightAware ADS-B (NZPK)
Sun 05:42:12 PM	-37.4482	173.9894	→ 74°	444.0	511.0	21400.0	-2,225 Descending	FlightAware ADS-B (NZWP)
Sun 05:42:42 PM	-37.4321	174.0605	→ 74°	440.0	506.0	20325.0	-2,200 Descending	FlightAware ADS-B (AKL / NZAA)
Sun 05:43:12 PM	-37.4154	174.1331	→ 74°	436.0	502.0	19200.0	-2,275 Descending	FlightAware ADS-B (AKL / NZAA)
Sun 05:43:42 PM	-37.3984	174.2072	→ 74°	433.0	498.0	18050.0	-2,275 Descending	FlightAware ADS-B (AKL / NZAA)
Sun 05:44:12 PM	-37.382	174.2786	→ 74°	427.0	491.0	16925.0	-2,250 Descending	FlightAware ADS-B (AKL / NZAA)
Sun 05:44:42 PM	-37.3657	174.3495	→ 74°	420.0	483.0	15800.0	-2,298 Descending	FlightAware ADS-B (TRG / NZTG)
Sun 05:45:14 PM	-37.3482	174.4258	→ 74°	412.0	474.0	14550.0	-2,237 Descending	FlightAware ADS-B (AKL / NZAA)
Sun 05:45:39 PM	-37.3335	174.4778	→ 68°	407.0	468.0	13675.0	-2,192 Descending	FlightAware ADS-B (HLZ / NZHN)
Sun 05:46:19 PM	-37.3004	174.5627	↗ 63°	398.0	458.0	12175.0	-2,176 Descending	FlightAware ADS-B (HLZ / NZHN)
Sun 05:46:50 PM	-37.2749	174.6264	↗ 63°	390.0	449.0	11100.0	-2,200 Descending	FlightAware ADS-B (NZPK)
Sun 05:47:19 PM	-37.2508	174.6862	↗ 63°	385.0	443.0	9975.0	-2,237 Descending	FlightAware ADS-B (NZWP)
Sun 05:47:49 PM	-37.2266	174.7466	↗ 63°	380.0	437.0	8900.0	-2,000 Descending	FlightAware ADS-B (NZWP)
Sun 05:48:19 PM	-37.2042	174.802	↗ 63°	369.0	425.0	7975.0	-1,925 Descending	FlightAware ADS-B (NZMB)
Sun 05:48:49 PM	-37.1817	174.8578	↗ 63°	344.0	396.0	6975.0	-1,900 Descending	FlightAware ADS-B (NZMB)
Sun 05:49:19 PM	-37.1604	174.9101	↗ 63°	327.0	376.0	6075.0	-1,533 Descending	FlightAware ADS-B (AMZ / NZAR)
Sun 05:49:35 PM	-37.1474	174.936	↗ 52°	320.0	368.0	5800.0	-794 Descending	FlightAware ADS-B (NZPK)
Sun 05:49:53 PM	-37.1285	174.96	↗ 40°	300.0	345.0	5625.0	-529 Descending	FlightAware ADS-B (AKL / NZAA)
Sun 05:50:09 PM	-37.1134	174.9757	↗ 40°	292.0	336.0	5500.0	-545 Descending	FlightAware ADS-B (AKL / NZAA)
Sun 05:50:26 PM	-37.0956	174.9945	↗ 40°	287.0	330.0	5325.0	-909 Descending	FlightAware ADS-B (NZME)
Sun 05:50:42 PM	-37.0792	175.0116	↗ 40°	290.0	334.0	5000.0	-1,266 Descending	FlightAware ADS-B (AKL / NZAA)
Sun 05:50:58 PM	-37.0637	175.0278	↗ 40°	290.0	334.0	4650.0	-1,266 Descending	FlightAware ADS-B (NZPI)
Sun 05:51:14 PM	-37.0448	175.0476	↗ 40°	287.0	330.0	4325.0	-818 Descending	FlightAware ADS-B (NZWP)
Sun 05:51:31 PM	-37.0289	175.0624	↗ 29°	272.0	313.0	4200.0	-591 Descending	FlightAware ADS-B (NZPK)
Sun 05:51:47 PM	-37.01	175.0667	↑ 356°	261.0	300.0	4000.0	-1,033 Descending	FlightAware ADS-B (NZPK)
Sun 05:52:16 PM	-36.9769	175.0541	↑ 341°	252.0	290.0	3425.0	-1,067 Descending	FlightAware ADS-B
Sun 05:52:32 PM	-36.9598	175.0443	↖ 322°	236.0	272.0	3200.0	-514 Descending	FlightAware ADS-B (AKL / NZAA)
Sun 05:52:51 PM	-36.9504	175.025	← 285°	204.0	235.0	3125.0	-300 Descending	FlightAware ADS-B (AKL / NZAA)
Sun 05:53:07 PM	-36.9511	175.0063	← 256°	183.0	211.0	3025.0	-439 Descending	FlightAware ADS-B (AKL / NZAA)
Sun 05:53:32 PM	-36.9578	174.9816	← 250°	182.0	209.0	2825.0	-768 Descending	FlightAware ADS-B (AKL / NZAA)
Sun 05:53:48 PM	-36.962	174.9669	← 251°	181.0	208.0	2500.0	-1,031 Descending	FlightAware ADS-B (AKL / NZAA)
Sun 05:54:04 PM	-36.9663	174.9513	← 251°	175.0	201.0	2275.0	-891 Descending	FlightAware ADS-B (RAG / NZRA)
Sun 05:54:20 PM	-36.9703	174.9367	← 251°	166.0	191.0	2025.0	-938 Descending	FlightAware ADS-B (AKL / NZAA)
Sun 05:54:36 PM	-36.9744	174.9221	← 251°	160.0	184.0	1775.0	-851 Descending	FlightAware ADS-B (AKL / NZAA)
Sun 05:54:57 PM	-36.9791	174.9051	← 251°	149.0	171.0	1500.0	-781 Descending	FlightAware ADS-B (AKL / NZAA)
Sun 05:55:24 PM	-36.985	174.8841	← 252°	137.0	158.0	1150.0	-733 Descending	FlightAware ADS-B (AKL / NZAA)
Sun 05:55:40 PM	-36.9885	174.8714	← 251°	139.0	160.0	975.0	-682 Descending	FlightAware ADS-B (AKL / NZAA)
Sun 05:55:57 PM	-36.992	174.8584	← 251°	140.0	161.0	775.0	-727 Descending	FlightAware ADS-B (AKL / NZAA)
Sun 05:56:13 PM	-36.9952	174.8472	← 252°	138.0	159.0	575.0	-750 Descending	FlightAware ADS-B (AKL / NZAA)
