# Supplementary material for: TrackMatcher – a tool for finding intercepts in tracks of geographical positions
Source: Copernicus journal article supplement (doi:10.5194/gmd-15-7557-2022), 2022-10-18
Supplement: Supplementary file 1 [file gmd-15-7557-2022-supplement.zip › ESM/example/data/flights/ANZ192_27-JAN-2019_YPAD-NZAA.dat]

Time (CET)	Latitude	Longitude	Course	kts	mph	feet	Rate	Reporting Facility
Sun 02:38:01 AM	-34.9693	138.5013	↙ 231°	168.0	193.0	1025.0	Level	FlightAware ADS-B (ADL / YPAD)
Sun 02:38:17 AM	-34.9779	138.4888	↙ 230°	176.0	203.0	1525.0	1,688 Climbing	FlightAware ADS-B (ADL / YPAD)
Sun 02:38:33 AM	-34.986	138.477	↙ 230°	187.0	215.0	1925.0	1,988 Climbing	FlightAware ADS-B (YADG)
Sun 02:39:00 AM	-35.0016	138.4544	↙ 230°	191.0	220.0	2950.0	2,173 Climbing	FlightAware ADS-B (ADL / YPAD)
Sun 02:39:22 AM	-35.0143	138.4359	↙ 231°	199.0	229.0	3700.0	1,538 Climbing	FlightAware ADS-B (ADL / YPAD)
Sun 02:39:39 AM	-35.0269	138.4197	↙ 218°	227.0	261.0	3950.0	1,414 Climbing	FlightAware ADS-B (ADL / YPAD)
Sun 02:39:57 AM	-35.0441	138.4155	↓ 177°	239.0	275.0	4525.0	2,266 Climbing	FlightAware ADS-B (ADL / YPAD)
Sun 02:40:26 AM	-35.0727	138.436	↘ 142°	257.0	296.0	5725.0	2,063 Climbing	FlightAware ADS-B (PAL / YPPF)
Sun 02:40:45 AM	-35.0921	138.4554	↘ 138°	280.0	322.0	6175.0	1,833 Climbing	FlightAware ADS-B (ADL / YPAD)
Sun 02:41:02 AM	-35.1041	138.4787	→ 109°	294.0	338.0	6825.0	2,364 Climbing	FlightAware ADS-B (ADL / YPAD)
Sun 02:41:18 AM	-35.1063	138.5054	→ 88°	301.0	346.0	7475.0	2,429 Climbing	FlightAware ADS-B (ADL / YPAD)
Sun 02:41:44 AM	-35.1037	138.5484	→ 86°	306.0	352.0	8525.0	2,400 Climbing	FlightAware ADS-B (ADL / YPAD)
Sun 02:42:03 AM	-35.1011	138.5841	→ 85°	311.0	358.0	9275.0	1,974 Climbing	FlightAware ADS-B (YPED)
Sun 02:42:41 AM	-35.0967	138.6485	→ 85°	330.0	380.0	10400.0	1,559 Climbing	FlightAware ADS-B (ADL / YPAD)
Sun 02:42:54 AM	-35.095	138.6745	→ 86°	343.0	395.0	10600.0	783 Climbing	Aus ATC (ADS-B)
Sun 02:43:04 AM	-35.0937	138.6941	→ 85°	348.0	400.0	10700.0	1,676 Climbing	Aus ATC (ADS-B)
Sun 02:43:11 AM	-35.0926	138.711	→ 86°	352.0	405.0	11075.0	2,800 Climbing	FlightAware ADS-B (ADL / YPAD)
Sun 02:43:19 AM	-35.0918	138.7239	→ 86°	354.0	407.0	11400.0	2,250 Climbing	Aus ATC (ADS-B)
Sun 02:43:41 AM	-35.089	138.7707	→ 86°	359.0	413.0	12200.0	2,229 Climbing	FlightAware ADS-B (ADL / YPAD)
Sun 02:43:54 AM	-35.0875	138.7945	→ 86°	362.0	417.0	12700.0	2,087 Climbing	Aus ATC (ADS-B)
Sun 02:44:04 AM	-35.0862	138.8151	→ 86°	368.0	423.0	13000.0	1,600 Climbing	Aus ATC (ADS-B)
Sun 02:44:09 AM	-35.0856	138.8256	→ 86°	372.0	428.0	13100.0	1,286 Climbing	Aus ATC (ADS-B)
Sun 02:44:11 AM	-35.0853	138.8303	→ 86°	374.0	430.0	13150.0	1,200 Climbing	FlightAware ADS-B (PAL / YPPF)
Sun 02:44:19 AM	-35.0842	138.8467	→ 85°	378.0	435.0	13300.0	1,150 Climbing	Aus ATC (ADS-B)
Sun 02:44:41 AM	-35.081	138.8971	→ 86°	397.0	457.0	13725.0	2,048 Climbing	FlightAware ADS-B (ADL / YPAD)
Sun 02:45:11 AM	-35.0767	138.9652	→ 86°	400.0	460.0	15075.0	2,484 Climbing	FlightAware ADS-B (ADL / YPAD)
Sun 02:45:42 AM	-35.0723	139.033	→ 85°	406.0	467.0	16250.0	2,149 Climbing	FlightAware ADS-B (YMBD)
Sun 02:45:48 AM	-35.0712	139.0484	→ 85°	407.0	468.0	16400.0	2,429 Climbing	Aus ATC (ADS-B)
Sun 02:46:03 AM	-35.0688	139.0828	→ 85°	410.0	472.0	17100.0	2,625 Climbing	Aus ATC (ADS-B)
Sun 02:46:12 AM	-35.0675	139.1031	→ 85°	412.0	474.0	17450.0	2,400 Climbing	FlightAware ADS-B (YMBD)
Sun 02:46:13 AM	-35.0673	139.1059	→ 85°	412.0	474.0	17500.0	2,500 Climbing	Aus ATC (ADS-B)
Sun 02:46:18 AM	-35.0665	139.1176	→ 85°	413.0	475.0	17700.0	2,000 Climbing	Aus ATC (ADS-B)
Sun 02:46:28 AM	-35.0649	139.1408	→ 85°	416.0	479.0	18000.0	2,400 Climbing	Aus ATC (ADS-B)
Sun 02:46:33 AM	-35.0641	139.1525	→ 85°	416.0	479.0	18300.0	2,625 Climbing	Aus ATC (ADS-B)
Sun 02:46:36 AM	-35.0637	139.1607	→ 86°	416.0	479.0	18350.0	2,400 Climbing	FlightAware ADS-B (YKTH)
Sun 02:46:38 AM	-35.0636	139.1643	→ 87°	417.0	480.0	18500.0	2,250 Climbing	Aus ATC (ADS-B)
Sun 02:46:48 AM	-35.0647	139.1879	→ 93°	420.0	483.0	18800.0	2,000 Climbing	Aus ATC (ADS-B)
Sun 02:46:53 AM	-35.0664	139.1997	→ 100°	421.0	484.0	19000.0	2,667 Climbing	Aus ATC (ADS-B)
Sun 02:46:57 AM	-35.0681	139.2078	→ 104°	423.0	487.0	19200.0	2,308 Climbing	FlightAware ADS-B (YXAD)
Sun 02:47:19 AM	-35.0861	139.2558	↘ 122°	428.0	493.0	20000.0	2,769 Climbing	FlightAware ADS-B (ADL / YPAD)
Sun 02:47:36 AM	-35.1053	139.2879	↘ 127°	434.0	499.0	21000.0	2,615 Climbing	FlightAware ADS-B (ADL / YPAD)
Sun 02:47:58 AM	-35.1335	139.3336	↘ 127°	436.0	502.0	21700.0	2,000 Climbing	Aus ATC (ADS-B)
Sun 02:48:03 AM	-35.1397	139.3434	↘ 129°	437.0	503.0	21900.0	2,400 Climbing	Aus ATC (ADS-B)
Sun 02:48:08 AM	-35.1459	139.3531	↘ 127°	437.0	503.0	22100.0	2,250 Climbing	Aus ATC (ADS-B)
Sun 02:48:15 AM	-35.1538	139.3657	↘ 128°	439.0	505.0	22350.0	2,400 Climbing	FlightAware ADS-B (PAL / YPPF)
Sun 02:48:18 AM	-35.1583	139.3728	↘ 129°	440.0	506.0	22500.0	2,625 Climbing	Aus ATC (ADS-B)
Sun 02:48:23 AM	-35.1645	139.3827	↘ 128°	441.0	507.0	22700.0	2,000 Climbing	Aus ATC (ADS-B)
Sun 02:48:33 AM	-35.177	139.4026	↘ 128°	445.0	512.0	23000.0	2,160 Climbing	Aus ATC (ADS-B)
Sun 02:48:48 AM	-35.1958	139.4326	↘ 128°	447.0	514.0	23600.0	2,350 Climbing	Aus ATC (ADS-B)
Sun 02:49:03 AM	-35.2147	139.4631	↘ 127°	452.0	520.0	24175.0	2,100 Climbing	FlightAware ADS-B (PAL / YPPF)
Sun 02:49:33 AM	-35.2489	139.5275	↘ 119°	467.0	537.0	25175.0	1,991 Climbing	FlightAware ADS-B (MQL / YMIA)
Sun 02:50:01 AM	-35.2761	139.5966	↘ 116°	477.0	549.0	26100.0	1,864 Climbing	Aus ATC (ADS-B)
Sun 02:50:06 AM	-35.2807	139.6089	↘ 115°	479.0	551.0	26200.0	1,600 Climbing	Aus ATC (ADS-B)
Sun 02:50:16 AM	-35.2899	139.6338	↘ 115°	483.0	556.0	26500.0	1,500 Climbing	Aus ATC (ADS-B)
Sun 02:50:18 AM	-35.2914	139.6376	↘ 117°	484.0	557.0	26500.0	Level	Aus ATC (ADS-B)
Sun 02:50:18 AM	-35.2918	139.6388	↘ 114°	482.0	555.0	26500.0	1,385 Climbing	FlightAware ADS-B (YPED)
Sun 02:50:31 AM	-35.3039	139.6714	↘ 115°	491.0	565.0	26800.0	1,200 Climbing	Aus ATC (ADS-B)
Sun 02:50:43 AM	-35.3148	139.701	↘ 114°	498.0	573.0	27000.0	1,235 Climbing	Aus ATC (ADS-B)
Sun 02:50:48 AM	-35.3199	139.7148	↘ 114°	501.0	577.0	27150.0	1,600 Climbing	FlightAware ADS-B (YXAD)
Sun 02:50:58 AM	-35.3291	139.7398	↘ 114°	505.0	581.0	27400.0	1,174 Climbing	Aus ATC (ADS-B)
Sun 02:51:11 AM	-35.342	139.7751	↘ 114°	512.0	589.0	27600.0	1,333 Climbing	Aus ATC (ADS-B)
Sun 02:51:16 AM	-35.3469	139.7883	↘ 114°	514.0	592.0	27800.0	1,500 Climbing	Aus ATC (ADS-B)
Sun 02:51:18 AM	-35.3482	139.7918	↘ 114°	514.0	592.0	27775.0	857 Climbing	FlightAware ADS-B (ADL / YPAD)
Sun 02:51:23 AM	-35.3534	139.8057	↘ 115°	516.0	594.0	27900.0	1,350 Climbing	Aus ATC (ADS-B)
Sun 02:51:28 AM	-35.3583	139.8192	↘ 114°	518.0	596.0	28000.0	1,600 Climbing	Aus ATC (ADS-B)
Sun 02:51:38 AM	-35.3682	139.846	↘ 114°	522.0	601.0	28300.0	1,600 Climbing	Aus ATC (ADS-B)
Sun 02:51:43 AM	-35.3731	139.8595	↘ 114°	523.0	602.0	28400.0	1,800 Climbing	Aus ATC (ADS-B)
Sun 02:51:48 AM	-35.3781	139.873	↘ 114°	525.0	604.0	28600.0	1,600 Climbing	Aus ATC (ADS-B)
Sun 02:51:58 AM	-35.3881	139.9002	↘ 114°	529.0	609.0	28800.0	1,200 Climbing	Aus ATC (ADS-B)
Sun 02:52:03 AM	-35.3932	139.9139	↘ 114°	530.0	610.0	28900.0	1,200 Climbing	Aus ATC (ADS-B)
Sun 02:52:13 AM	-35.4033	139.9415	↘ 114°	536.0	617.0	29100.0	1,200 Climbing	Aus ATC (ADS-B)
Sun 02:52:18 AM	-35.4091	139.9572	↘ 114°	538.0	619.0	29200.0	1,200 Climbing	FlightAware ADS-B (YPED)
Sun 02:52:48 AM	-35.44	140.0413	↘ 114°	551.0	634.0	29800.0	1,200 Climbing	FlightAware ADS-B (YPED)
Sun 02:52:58 AM	-35.4499	140.0683	↘ 114°	553.0	636.0	30000.0	1,667 Climbing	Aus ATC (ADS-B)
Sun 02:53:06 AM	-35.4587	140.0923	↘ 114°	555.0	639.0	30300.0	1,600 Climbing	Aus ATC (ADS-B)
Sun 02:53:13 AM	-35.4657	140.1113	↘ 114°	560.0	644.0	30400.0	500 Climbing	Aus ATC (ADS-B)
Sun 02:53:18 AM	-35.471	140.1259	↘ 114°	562.0	647.0	30400.0	800 Climbing	Aus ATC (ADS-B)
Sun 02:53:28 AM	-35.4817	140.1551	↘ 114°	566.0	651.0	30600.0	923 Climbing	Aus ATC (ADS-B)
Sun 02:53:31 AM	-35.4854	140.1652	↘ 114°	568.0	654.0	30600.0	1,200 Climbing	Aus ATC (ADS-B)
Sun 02:53:43 AM	-35.4979	140.1993	↘ 114°	573.0	659.0	30900.0	1,412 Climbing	Aus ATC (ADS-B)
Sun 02:53:48 AM	-35.5033	140.2142	↘ 114°	575.0	662.0	31000.0	1,385 Climbing	FlightAware ADS-B (MQL / YMIA)
Sun 02:53:56 AM	-35.5124	140.2393	↘ 114°	577.0	664.0	31200.0	1,200 Climbing	Aus ATC (ADS-B)
Sun 02:53:58 AM	-35.5142	140.2441	↘ 113°	578.0	665.0	31200.0	1,000 Climbing	Aus ATC (ADS-B)
Sun 02:54:08 AM	-35.5252	140.274	↘ 114°	581.0	669.0	31400.0	1,275 Climbing	Aus ATC (ADS-B)
Sun 02:54:18 AM	-35.5362	140.3043	↘ 114°	585.0	673.0	31625.0	1,385 Climbing	FlightAware ADS-B (MQL / YMIA)
Sun 02:54:21 AM	-35.5399	140.3146	↘ 113°	586.0	674.0	31700.0	1,313 Climbing	Aus ATC (ADS-B)
Sun 02:54:26 AM	-35.5455	140.3298	↘ 115°	588.0	677.0	31800.0	1,000 Climbing	Aus ATC (ADS-B)
Sun 02:54:33 AM	-35.5528	140.3498	↘ 114°	590.0	679.0	31900.0	1,200 Climbing	Aus ATC (ADS-B)
Sun 02:54:41 AM	-35.5621	140.3755	↘ 114°	591.0	680.0	32100.0	1,600 Climbing	Aus ATC (ADS-B)
Sun 02:54:48 AM	-35.5698	140.3964	↘ 114°	592.0	681.0	32299.999999999996	800 Climbing	FlightAware ADS-B (YSFG)
Sun 02:54:56 AM	-35.5787	140.4212	↘ 114°	592.0	681.0	32299.999999999996	1,333 Climbing	Aus ATC (ADS-B)
Sun 02:54:57 AM	-35.5806	140.4264	↘ 114°	593.0	682.0	32500.0	2,250 Climbing	Aus ATC (ADS-B)
Sun 02:55:12 AM	-35.5974	140.4725	↘ 114°	595.0	685.0	32900.0	1,571 Climbing	Aus ATC (ADS-B)
Sun 02:55:18 AM	-35.6038	140.4898	↘ 114°	597.0	687.0	33050.0	1,200 Climbing	FlightAware ADS-B (MQL / YMIA)
Sun 02:55:22 AM	-35.6087	140.5034	↘ 114°	599.0	689.0	33100.0	1,125 Climbing	Aus ATC (ADS-B)
Sun 02:55:26 AM	-35.6125	140.5141	↘ 113°	599.0	689.0	33200.0	1,500 Climbing	Aus ATC (ADS-B)
Sun 02:55:50 AM	-35.6395	140.5888	↘ 114°	603.0	694.0	33800.0	1,650 Climbing	FlightAware ADS-B (HLT / YHML)
Sun 02:56:06 AM	-35.6576	140.6388	↘ 114°	600.0	690.0	34300.0	2,118 Climbing	Aus ATC (ADS-B)
Sun 02:56:07 AM	-35.6594	140.6438	↘ 114°	600.0	690.0	34400.0	2,182 Climbing	Aus ATC (ADS-B)
Sun 02:56:17 AM	-35.6706	140.6749	↘ 114°	600.0	690.0	34700.0	1,731 Climbing	Aus ATC (ADS-B)
Sun 02:56:20 AM	-35.6737	140.6836	↘ 114°	600.0	690.0	34775.0	1,200 Climbing	FlightAware ADS-B (YXAD)
Sun 02:56:22 AM	-35.6762	140.6904	↘ 116°	600.0	690.0	34800.0	1,773 Climbing	Aus ATC (ADS-B)
Sun 02:56:31 AM	-35.6857	140.7167	↘ 114°	599.0	689.0	35100.0	1,875 Climbing	Aus ATC (ADS-B)
Sun 02:56:50 AM	-35.7067	140.7754	↘ 114°	597.0	687.0	35675.0	1,824 Climbing	FlightAware ADS-B (YXAD)
Sun 02:57:22 AM	-35.7419	140.8736	↘ 114°	593.0	682.0	36650.0	1,893 Climbing	FlightAware ADS-B (MQL / YMIA)
Sun 02:57:32 AM	-35.7538	140.907	↘ 114°	592.0	681.0	37000.0	1,800 Climbing	Aus ATC (ADS-B)
Sun 02:57:37 AM	-35.7593	140.9224	↘ 114°	592.0	681.0	37100.0	1,200 Climbing	Aus ATC (ADS-B)
Sun 02:57:47 AM	-35.7703	140.9533	↘ 113°	592.0	681.0	37300.0	1,100 Climbing	Aus ATC (ADS-B)
Sun 02:57:52 AM	-35.7748	140.9659	↘ 114°	592.0	681.0	37375.0	1,800 Climbing	FlightAware ADS-B (MQL / YMIA)
Sun 02:57:57 AM	-35.7812	140.9839	↘ 114°	592.0	681.0	37600.0	1,875 Climbing	Aus ATC (ADS-B)
Sun 02:58:12 AM	-35.7976	141.0299	↘ 114°	587.0	676.0	38000.0	1,750 Climbing	Aus ATC (ADS-B)
Sun 02:58:21 AM	-35.8067	141.0555	↘ 114°	585.0	673.0	38300.0	2,400 Climbing	Aus ATC (ADS-B)
Sun 02:58:22 AM	-35.8084	141.0603	↘ 116°	584.0	672.0	38400.0	1,210 Climbing	Aus ATC (ADS-B)
Sun 02:58:52 AM	-35.8406	141.1511	↘ 114°	584.0	672.0	38925.0	581 Climbing	FlightAware ADS-B (YCLC)
Sun 02:59:24 AM	-35.8745	141.2472	↘ 113°	586.0	674.0	39000.0	129 Climbing	FlightAware ADS-B (YSFG)
Sun 02:59:27 AM	-35.8784	141.2582	↘ 113°	586.0	674.0	39000.0	Level	Aus ATC (ADS-B)
Sun 02:59:35 AM	-35.8876	141.2839	↘ 114°	587.0	676.0	39000.0	Level	Aus ATC (ADS-B)
Sun 02:59:37 AM	-35.8893	141.2888	↘ 113°	587.0	676.0	39000.0	Level	Aus ATC (ADS-B)
Sun 02:59:50 AM	-35.9038	141.3297	↘ 114°	586.0	674.0	39000.0	Level	Aus ATC (ADS-B)
Sun 02:59:52 AM	-35.9055	141.3346	↘ 114°	586.0	674.0	39000.0	Level	Aus ATC (ADS-B)
Sun 02:59:58 AM	-35.9132	141.3565	↘ 113°	586.0	674.0	39000.0	Level	FlightAware ADS-B (YKTH)
Sun 03:00:28 AM	-35.9439	141.4438	↘ 113°	586.0	674.0	39000.0	Level	FlightAware ADS-B (MQL / YMIA)
Sun 03:00:32 AM	-35.9485	141.457	↘ 113°	586.0	674.0	39000.0	Level	Aus ATC (ADS-B)
Sun 03:00:42 AM	-35.9592	141.4876	↘ 113°	586.0	674.0	39000.0	Level	Aus ATC (ADS-B)
Sun 03:00:47 AM	-35.9646	141.5029	↘ 114°	586.0	674.0	39000.0	Level	Aus ATC (ADS-B)
Sun 03:00:55 AM	-35.9736	141.5283	↘ 114°	586.0	674.0	39000.0	Level	Aus ATC (ADS-B)
Sun 03:01:00 AM	-35.9786	141.5425	↘ 113°	586.0	674.0	39000.0	Level	FlightAware ADS-B (MQL / YMIA)
Sun 03:01:02 AM	-35.9805	141.5478	↘ 112°	586.0	674.0	39000.0	Level	Aus ATC (ADS-B)
Sun 03:01:07 AM	-35.9858	141.5632	↘ 113°	585.0	673.0	39000.0	Level	Aus ATC (ADS-B)
Sun 03:01:17 AM	-35.9964	141.5938	↘ 113°	585.0	673.0	39000.0	Level	Aus ATC (ADS-B)
Sun 03:01:20 AM	-36.0003	141.605	↘ 114°	585.0	673.0	39000.0	Level	Aus ATC (ADS-B)
Sun 03:01:30 AM	-36.01	141.6325	↘ 113°	585.0	673.0	39000.0	Level	FlightAware ADS-B (HLT / YHML)
Sun 03:01:32 AM	-36.0124	141.6397	↘ 111°	585.0	673.0	39000.0	Level	Aus ATC (ADS-B)
Sun 03:01:47 AM	-36.0284	141.6855	↘ 114°	584.0	672.0	39000.0	Level	Aus ATC (ADS-B)
Sun 03:01:57 AM	-36.0391	141.7161	↘ 114°	583.0	671.0	39000.0	Level	Aus ATC (ADS-B)
Sun 03:02:02 AM	-36.0444	141.7313	↘ 113°	584.0	672.0	39000.0	Level	Aus ATC (ADS-B)
Sun 03:02:12 AM	-36.0551	141.7618	↘ 113°	583.0	671.0	39000.0	Level	Aus ATC (ADS-B)
Sun 03:02:17 AM	-36.0604	141.777	↘ 114°	583.0	671.0	39000.0	Level	Aus ATC (ADS-B)
Sun 03:02:22 AM	-36.0657	141.7924	↘ 113°	582.0	670.0	39000.0	Level	Aus ATC (ADS-B)
Sun 03:02:32 AM	-36.0762	141.8229	↘ 113°	582.0	670.0	39000.0	Level	Aus ATC (ADS-B)
Sun 03:02:37 AM	-36.0815	141.8382	↘ 113°	582.0	670.0	39000.0	Level	Aus ATC (ADS-B)
Sun 03:02:47 AM	-36.0921	141.8687	↘ 113°	583.0	671.0	39000.0	Level	Aus ATC (ADS-B)
Sun 03:03:02 AM	-36.108	141.9145	↘ 113°	583.0	671.0	39000.0	Level	Aus ATC (ADS-B)
Sun 03:03:05 AM	-36.111	141.9235	↘ 113°	583.0	671.0	39000.0	Level	FlightAware ADS-B (ARY / YARA)
Sun 03:03:12 AM	-36.1186	141.9451	↘ 113°	583.0	671.0	39000.0	Level	Aus ATC (ADS-B)
Sun 03:03:27 AM	-36.1343	141.9911	↘ 113°	584.0	672.0	39000.0	Level	Aus ATC (ADS-B)
Sun 03:03:30 AM	-36.1382	142.0025	↘ 113°	584.0	672.0	39000.0	Level	Aus ATC (ADS-B)
Sun 03:03:36 AM	-36.143	142.0163	↘ 113°	584.0	672.0	39000.0	Level	FlightAware ADS-B (ARY / YARA)
Sun 03:03:37 AM	-36.1449	142.0217	↘ 114°	584.0	672.0	39000.0	Level	Aus ATC (ADS-B)
Sun 03:03:45 AM	-36.1539	142.0481	↘ 113°	584.0	672.0	39000.0	Level	Aus ATC (ADS-B)
Sun 03:04:06 AM	-36.1769	142.1147	↘ 113°	585.0	673.0	39000.0	Level	FlightAware ADS-B (YKTH)
Sun 03:04:36 AM	-36.207	142.2024	↘ 113°	586.0	674.0	39000.0	Level	FlightAware ADS-B (MGB / YMTG)
Sun 03:04:41 AM	-36.2135	142.2216	↘ 112°	585.0	673.0	39000.0	Level	Aus ATC (ADS-B)
Sun 03:04:51 AM	-36.224	142.2523	↘ 113°	586.0	674.0	39000.0	Level	Aus ATC (ADS-B)
Sun 03:04:56 AM	-36.2293	142.2677	↘ 113°	585.0	673.0	39000.0	Level	Aus ATC (ADS-B)
Sun 03:05:06 AM	-36.2398	142.2985	↘ 113°	584.0	672.0	39000.0	Level	Aus ATC (ADS-B)
Sun 03:05:11 AM	-36.245	142.3138	↘ 112°	585.0	673.0	39000.0	Level	Aus ATC (ADS-B)
Sun 03:05:16 AM	-36.2503	142.3292	↘ 113°	585.0	673.0	39000.0	Level	Aus ATC (ADS-B)
Sun 03:05:26 AM	-36.2608	142.36	↘ 113°	585.0	673.0	39000.0	Level	Aus ATC (ADS-B)
Sun 03:05:31 AM	-36.2661	142.3753	↘ 113°	585.0	673.0	39000.0	Level	Aus ATC (ADS-B)
Sun 03:05:37 AM	-36.2735	142.3972	↘ 113°	586.0	674.0	39000.0	Level	FlightAware ADS-B (MQL / YMIA)
Sun 03:05:41 AM	-36.2766	142.4061	↘ 113°	585.0	673.0	39000.0	Level	Aus ATC (ADS-B)
Sun 03:05:56 AM	-36.2923	142.4524	↘ 113°	585.0	673.0	39000.0	Level	Aus ATC (ADS-B)
Sun 03:06:06 AM	-36.3028	142.4833	↘ 113°	585.0	673.0	39000.0	Level	Aus ATC (ADS-B)
Sun 03:06:07 AM	-36.3032	142.4846	↘ 113°	585.0	673.0	39000.0	Level	FlightAware ADS-B (MEL / YMML)
Sun 03:06:11 AM	-36.3079	142.4987	↘ 113°	585.0	673.0	39000.0	Level	Aus ATC (ADS-B)
Sun 03:06:21 AM	-36.3184	142.5295	↘ 113°	585.0	673.0	39000.0	Level	Aus ATC (ADS-B)
Sun 03:06:31 AM	-36.3288	142.5604	↘ 113°	585.0	673.0	39000.0	Level	Aus ATC (ADS-B)
Sun 03:06:37 AM	-36.3349	142.5783	↘ 113°	585.0	673.0	39000.0	Level	FlightAware ADS-B (YCLC)
Sun 03:06:41 AM	-36.3393	142.5911	↘ 112°	584.0	672.0	39000.0	Level	Aus ATC (ADS-B)
Sun 03:06:46 AM	-36.3445	142.6066	↘ 112°	585.0	673.0	39000.0	Level	Aus ATC (ADS-B)
Sun 03:06:56 AM	-36.3549	142.6375	↘ 113°	585.0	673.0	39000.0	Level	Aus ATC (ADS-B)
Sun 03:07:11 AM	-36.3705	142.6838	↘ 113°	585.0	673.0	39000.0	Level	Aus ATC (ADS-B)
Sun 03:07:21 AM	-36.3809	142.7146	↘ 113°	584.0	672.0	39000.0	Level	Aus ATC (ADS-B)
Sun 03:07:36 AM	-36.3965	142.7609	↘ 113°	584.0	672.0	39000.0	-79 Descending	Aus ATC (ADS-B)
Sun 03:07:40 AM	-36.4014	142.7755	↘ 113°	583.0	671.0	38975.0	Level	FlightAware ADS-B (MQL / YMIA)
Sun 03:07:46 AM	-36.4069	142.7915	↘ 114°	583.0	671.0	39000.0	115 Climbing	Aus ATC (ADS-B)
Sun 03:07:53 AM	-36.4121	142.8069	↘ 113°	583.0	671.0	39000.0	Level	Aus ATC (ADS-B)
Sun 03:08:01 AM	-36.4224	142.8378	↘ 113°	583.0	671.0	39000.0	Level	Aus ATC (ADS-B)
Sun 03:08:06 AM	-36.4275	142.8531	↘ 113°	582.0	670.0	39000.0	Level	Aus ATC (ADS-B)
Sun 03:08:10 AM	-36.4312	142.8642	↘ 112°	583.0	671.0	39000.0	Level	FlightAware ADS-B (MEL / YMML)
Sun 03:08:43 AM	-36.4653	142.9665	↘ 112°	581.0	669.0	39000.0	Level	FlightAware ADS-B (MEL / YMML)
Sun 03:08:51 AM	-36.4737	142.9917	↘ 113°	581.0	669.0	39000.0	Level	Aus ATC (ADS-B)
Sun 03:09:06 AM	-36.489	143.0377	↘ 113°	580.0	667.0	39000.0	Level	Aus ATC (ADS-B)
Sun 03:09:13 AM	-36.4957	143.0578	↘ 112°	579.0	666.0	39000.0	Level	FlightAware ADS-B (MEL / YMML)
Sun 03:09:16 AM	-36.4993	143.0684	↘ 113°	580.0	667.0	39000.0	Level	Aus ATC (ADS-B)
Sun 03:09:21 AM	-36.5043	143.0838	↘ 112°	580.0	667.0	39000.0	Level	Aus ATC (ADS-B)
Sun 03:09:31 AM	-36.5145	143.1146	↘ 113°	580.0	667.0	39000.0	Level	Aus ATC (ADS-B)
Sun 03:09:36 AM	-36.5196	143.1299	↘ 113°	580.0	667.0	39000.0	Level	Aus ATC (ADS-B)
Sun 03:09:45 AM	-36.5291	143.1583	↘ 112°	581.0	669.0	39000.0	Level	FlightAware ADS-B (HLT / YHML)
Sun 03:10:17 AM	-36.5602	143.2523	↘ 112°	581.0	669.0	39000.0	Level	FlightAware ADS-B (ARY / YARA)
Sun 03:10:21 AM	-36.5655	143.2684	↘ 112°	581.0	669.0	39000.0	Level	Aus ATC (ADS-B)
Sun 03:10:47 AM	-36.5919	143.3486	↘ 112°	580.0	667.0	39000.0	Level	FlightAware ADS-B (MBW / YMMB)
Sun 03:10:56 AM	-36.601	143.3762	↘ 113°	581.0	669.0	39000.0	Level	Aus ATC (ADS-B)
Sun 03:11:01 AM	-36.6061	143.3917	↘ 112°	581.0	669.0	39000.0	Level	Aus ATC (ADS-B)
Sun 03:11:11 AM	-36.6162	143.4225	↘ 112°	581.0	669.0	39000.0	Level	Aus ATC (ADS-B)
Sun 03:11:16 AM	-36.6212	143.4378	↘ 112°	581.0	669.0	39000.0	Level	Aus ATC (ADS-B)
Sun 03:11:31 AM	-36.6364	143.4842	↘ 112°	581.0	669.0	39000.0	Level	Aus ATC (ADS-B)
Sun 03:11:36 AM	-36.6415	143.4996	↘ 112°	581.0	669.0	39000.0	Level	Aus ATC (ADS-B)
Sun 03:11:42 AM	-36.6475	143.5178	↘ 112°	582.0	670.0	39000.0	Level	FlightAware ADS-B (MBW / YMMB)
Sun 03:11:46 AM	-36.6516	143.5306	↘ 112°	581.0	669.0	39000.0	Level	Aus ATC (ADS-B)
Sun 03:11:51 AM	-36.6567	143.5461	↘ 113°	581.0	669.0	39000.0	Level	Aus ATC (ADS-B)
Sun 03:12:01 AM	-36.6668	143.577	↘ 112°	581.0	669.0	39000.0	Level	Aus ATC (ADS-B)
Sun 03:12:12 AM	-36.6776	143.6101	↘ 112°	580.0	667.0	39000.0	Level	FlightAware ADS-B (MBW / YMMB)
Sun 03:12:16 AM	-36.6819	143.6233	↘ 112°	581.0	669.0	39000.0	Level	Aus ATC (ADS-B)
Sun 03:12:26 AM	-36.692	143.6541	↘ 112°	581.0	669.0	39000.0	Level	Aus ATC (ADS-B)
Sun 03:12:31 AM	-36.697	143.6696	↘ 112°	580.0	667.0	39000.0	Level	Aus ATC (ADS-B)
Sun 03:12:41 AM	-36.7071	143.7006	↘ 112°	579.0	666.0	39000.0	-136 Descending	Aus ATC (ADS-B)
Sun 03:12:42 AM	-36.7088	143.7057	↘ 112°	580.0	667.0	38975.0	Level	FlightAware ADS-B (YAFD)
Sun 03:13:12 AM	-36.738	143.7955	↘ 112°	579.0	666.0	39000.0	44 Climbing	FlightAware ADS-B (YXWG)
Sun 03:13:16 AM	-36.7421	143.8085	↘ 113°	579.0	666.0	39000.0	Level	Aus ATC (ADS-B)
Sun 03:13:31 AM	-36.7572	143.8548	↘ 112°	579.0	666.0	39000.0	Level	Aus ATC (ADS-B)
Sun 03:13:41 AM	-36.7671	143.8856	↘ 112°	579.0	666.0	39000.0	Level	Aus ATC (ADS-B)
Sun 03:13:42 AM	-36.7687	143.8906	↘ 112°	579.0	666.0	39000.0	Level	FlightAware ADS-B (YBRS)
Sun 03:13:55 AM	-36.7821	143.9319	↘ 112°	579.0	666.0	39000.0	Level	Aus ATC (ADS-B)
Sun 03:14:05 AM	-36.792	143.9628	↘ 112°	577.0	664.0	39000.0	Level	Aus ATC (ADS-B)
Sun 03:14:10 AM	-36.797	143.9782	↘ 112°	577.0	664.0	39000.0	Level	Aus ATC (ADS-B)
Sun 03:14:13 AM	-36.7993	143.9856	↘ 112°	578.0	665.0	39000.0	591 Climbing	FlightAware ADS-B (YSBE)
Sun 03:14:43 AM	-36.8288	144.0772	↘ 112°	574.0	661.0	39325.0	977 Climbing	FlightAware ADS-B (YAFD)
Sun 03:14:56 AM	-36.8414	144.1166	↘ 112°	573.0	659.0	39700.0	1,056 Climbing	Aus ATC (ADS-B)
Sun 03:15:10 AM	-36.8561	144.1625	↘ 112°	573.0	659.0	39800.0	706 Climbing	Aus ATC (ADS-B)
Sun 03:15:13 AM	-36.8584	144.1697	↘ 112°	573.0	659.0	39900.0	1,200 Climbing	FlightAware ADS-B (YXWG)
Sun 03:15:20 AM	-36.8659	144.1932	↘ 112°	573.0	659.0	40000.0	1,000 Climbing	Aus ATC (ADS-B)
Sun 03:15:25 AM	-36.8708	144.2086	↘ 111°	573.0	659.0	40100.0	800 Climbing	Aus ATC (ADS-B)
Sun 03:15:35 AM	-36.8806	144.2393	↘ 112°	575.0	662.0	40200.0	400 Climbing	Aus ATC (ADS-B)
Sun 03:15:40 AM	-36.8855	144.2547	↘ 111°	576.0	663.0	40200.0	375 Climbing	Aus ATC (ADS-B)
Sun 03:15:43 AM	-36.888	144.2626	↘ 112°	576.0	663.0	40250.0	800 Climbing	FlightAware ADS-B (YAFD)
Sun 03:15:55 AM	-36.9002	144.301	↘ 112°	576.0	663.0	40400.0	882 Climbing	Aus ATC (ADS-B)
Sun 03:16:00 AM	-36.9051	144.3164	↘ 112°	576.0	663.0	40500.0	800 Climbing	Aus ATC (ADS-B)
Sun 03:16:10 AM	-36.9145	144.3474	↘ 111°	576.0	663.0	40600.0	808 Climbing	Aus ATC (ADS-B)
Sun 03:16:13 AM	-36.9179	144.3591	→ 110°	577.0	664.0	40675.0	1,200 Climbing	FlightAware ADS-B (YCLC)
Sun 03:16:15 AM	-36.919	144.3631	→ 109°	577.0	664.0	40700.0	450 Climbing	Aus ATC (ADS-B)
Sun 03:16:43 AM	-36.943	144.4499	→ 108°	580.0	667.0	40900.0	450 Climbing	FlightAware ADS-B (MGB / YMTG)
Sun 03:16:55 AM	-36.953	144.4895	→ 108°	580.0	667.0	41000.0	128 Climbing	Aus ATC (ADS-B)
Sun 03:17:30 AM	-36.9806	144.6014	→ 107°	580.0	667.0	41000.0	Level	Aus ATC (ADS-B)
Sun 03:17:35 AM	-36.9844	144.6169	→ 107°	580.0	667.0	41000.0	Level	FlightAware ADS-B (ABX / YMAY)
Sun 03:18:05 AM	-37.0073	144.7104	→ 107°	579.0	666.0	41000.0	Level	FlightAware ADS-B (HLT / YHML)
Sun 03:18:20 AM	-37.0197	144.7611	→ 107°	579.0	666.0	41000.0	Level	Aus ATC (ADS-B)
Sun 03:18:30 AM	-37.0275	144.7931	→ 107°	580.0	667.0	41000.0	Level	Aus ATC (ADS-B)
Sun 03:18:35 AM	-37.031	144.8077	→ 107°	580.0	667.0	41000.0	Level	FlightAware ADS-B (MBW / YMMB)
Sun 03:18:45 AM	-37.0391	144.8411	→ 107°	580.0	667.0	41000.0	Level	Aus ATC (ADS-B)
Sun 03:18:50 AM	-37.0429	144.8571	→ 107°	580.0	667.0	41000.0	Level	Aus ATC (ADS-B)
Sun 03:18:55 AM	-37.0468	144.8731	→ 107°	581.0	669.0	41000.0	Level	Aus ATC (ADS-B)
Sun 03:19:05 AM	-37.0543	144.9038	→ 107°	580.0	667.0	41000.0	Level	FlightAware ADS-B (BXG / YBDG)
Sun 03:19:35 AM	-37.0778	145.0012	→ 107°	580.0	667.0	41000.0	Level	Aus ATC (ADS-B)
Sun 03:19:50 AM	-37.0894	145.0491	→ 107°	579.0	666.0	41000.0	Level	Aus ATC (ADS-B)
Sun 03:20:00 AM	-37.0971	145.0811	→ 107°	578.0	665.0	41000.0	Level	Aus ATC (ADS-B)
Sun 03:20:05 AM	-37.101	145.0971	→ 107°	578.0	665.0	41000.0	Level	Aus ATC (ADS-B)
Sun 03:20:05 AM	-37.1006	145.0954	→ 107°	578.0	665.0	41000.0	Level	FlightAware ADS-B (MEL / YMML)
Sun 03:20:15 AM	-37.1086	145.1291	→ 106°	578.0	665.0	41000.0	Level	Aus ATC (ADS-B)
Sun 03:20:20 AM	-37.1125	145.1451	→ 107°	578.0	665.0	41000.0	Level	Aus ATC (ADS-B)
Sun 03:20:25 AM	-37.1163	145.1611	→ 107°	577.0	664.0	41000.0	-100 Descending	Aus ATC (ADS-B)
Sun 03:20:35 AM	-37.1238	145.1923	→ 107°	577.0	664.0	40975.0	Level	FlightAware ADS-B (MEL / YMML)
Sun 03:21:05 AM	-37.147	145.2895	→ 107°	576.0	663.0	41000.0	38 Climbing	FlightAware ADS-B (MEL / YMML)
Sun 03:21:15 AM	-37.1544	145.3207	→ 106°	577.0	664.0	41000.0	Level	Aus ATC (ADS-B)
Sun 03:21:20 AM	-37.1582	145.3367	→ 107°	577.0	664.0	41000.0	Level	Aus ATC (ADS-B)
Sun 03:21:30 AM	-37.1658	145.3686	→ 107°	577.0	664.0	41000.0	Level	Aus ATC (ADS-B)
Sun 03:21:35 AM	-37.1696	145.3846	→ 107°	577.0	664.0	41000.0	Level	Aus ATC (ADS-B)
Sun 03:21:43 AM	-37.1759	145.4114	→ 107°	577.0	664.0	41000.0	Level	Aus ATC (ADS-B)
Sun 03:21:50 AM	-37.1809	145.4325	→ 106°	577.0	664.0	41000.0	Level	Aus ATC (ADS-B)
Sun 03:21:55 AM	-37.1847	145.4485	→ 107°	577.0	664.0	41000.0	Level	Aus ATC (ADS-B)
Sun 03:22:05 AM	-37.1922	145.4805	→ 106°	576.0	663.0	41000.0	Level	Aus ATC (ADS-B)
Sun 03:22:08 AM	-37.1947	145.4911	→ 106°	576.0	663.0	41000.0	Level	Aus ATC (ADS-B)
Sun 03:22:20 AM	-37.2036	145.5283	→ 107°	575.0	662.0	41000.0	Level	Aus ATC (ADS-B)
Sun 03:22:36 AM	-37.2156	145.5792	→ 107°	576.0	663.0	41000.0	Level	FlightAware ADS-B (LST / YMLT)
Sun 03:23:05 AM	-37.2375	145.6718	→ 107°	574.0	661.0	41000.0	Level	Aus ATC (ADS-B)
Sun 03:23:06 AM	-37.2385	145.6764	→ 106°	574.0	661.0	41000.0	Level	FlightAware ADS-B (MEB / YMEN)
Sun 03:23:10 AM	-37.2412	145.6878	→ 106°	574.0	661.0	41000.0	Level	Aus ATC (ADS-B)
Sun 03:23:20 AM	-37.2487	145.7195	→ 107°	574.0	661.0	41000.0	Level	Aus ATC (ADS-B)
Sun 03:23:34 AM	-37.2599	145.7674	→ 107°	574.0	661.0	41000.0	Level	Aus ATC (ADS-B)
Sun 03:23:36 AM	-37.2607	145.7711	→ 106°	574.0	661.0	41000.0	Level	FlightAware ADS-B
Sun 03:23:48 AM	-37.2698	145.8101	→ 106°	574.0	661.0	41000.0	50 Climbing	Aus ATC (ADS-B)
Sun 03:24:06 AM	-37.2832	145.8673	→ 106°	573.0	659.0	41025.0	Level	FlightAware ADS-B (YXWG)
Sun 03:24:24 AM	-37.297	145.9266	→ 106°	573.0	659.0	41000.0	-56 Descending	Aus ATC (ADS-B)
Sun 03:24:33 AM	-37.3031	145.9532	→ 106°	572.0	658.0	41000.0	Level	Aus ATC (ADS-B)
Sun 03:24:39 AM	-37.308	145.9742	→ 106°	571.0	657.0	41000.0	Level	Aus ATC (ADS-B)
Sun 03:24:48 AM	-37.3142	146.0007	→ 106°	570.0	656.0	41000.0	Level	Aus ATC (ADS-B)
Sun 03:24:50 AM	-37.3154	146.0059	→ 107°	569.0	655.0	41000.0	Level	Aus ATC (ADS-B)
Sun 03:24:59 AM	-37.3226	146.0375	→ 106°	568.0	654.0	41000.0	Level	Aus ATC (ADS-B)
Sun 03:25:06 AM	-37.3262	146.0534	→ 106°	568.0	654.0	41000.0	Level	Aus ATC (ADS-B)
Sun 03:25:18 AM	-37.3359	146.0956	→ 106°	568.0	654.0	41000.0	Level	Aus ATC (ADS-B)
Sun 03:25:20 AM	-37.3371	146.1008	→ 108°	568.0	654.0	41000.0	Level	Aus ATC (ADS-B)
Sun 03:25:30 AM	-37.3444	146.1323	→ 106°	568.0	654.0	41000.0	Level	Aus ATC (ADS-B)
Sun 03:25:44 AM	-37.3554	146.1797	→ 106°	567.0	652.0	41000.0	88 Climbing	Aus ATC (ADS-B)
Sun 03:25:47 AM	-37.3568	146.1857	→ 106°	568.0	654.0	41025.0	Level	FlightAware ADS-B (MEL / YMML)
Sun 03:25:55 AM	-37.3626	146.2112	→ 106°	568.0	654.0	41000.0	-125 Descending	Aus ATC (ADS-B)
Sun 03:25:59 AM	-37.3662	146.2271	→ 106°	568.0	654.0	41000.0	Level	Aus ATC (ADS-B)
Sun 03:26:09 AM	-37.3734	146.2587	→ 106°	568.0	654.0	41000.0	Level	Aus ATC (ADS-B)
Sun 03:26:14 AM	-37.3769	146.2746	→ 106°	568.0	654.0	41000.0	Level	Aus ATC (ADS-B)
Sun 03:26:19 AM	-37.3806	146.2904	→ 107°	568.0	654.0	41000.0	Level	Aus ATC (ADS-B)
Sun 03:26:20 AM	-37.3808	146.2917	→ 106°	568.0	654.0	41000.0	Level	FlightAware ADS-B (YXWG)
Sun 03:26:29 AM	-37.3877	146.322	→ 106°	568.0	654.0	41000.0	Level	Aus ATC (ADS-B)
Sun 03:26:44 AM	-37.3986	146.3694	→ 106°	567.0	652.0	41000.0	Level	Aus ATC (ADS-B)
Sun 03:26:50 AM	-37.4018	146.383	→ 106°	567.0	652.0	41000.0	Level	FlightAware ADS-B (YLEG)
Sun 03:26:59 AM	-37.4095	146.4167	→ 106°	566.0	651.0	41000.0	Level	Aus ATC (ADS-B)
Sun 03:27:09 AM	-37.4168	146.4481	→ 106°	565.0	650.0	41000.0	Level	Aus ATC (ADS-B)
Sun 03:27:14 AM	-37.4204	146.4639	→ 106°	564.0	649.0	41000.0	136 Climbing	Aus ATC (ADS-B)
Sun 03:27:20 AM	-37.4242	146.481	→ 106°	564.0	649.0	41025.0	Level	FlightAware ADS-B (MBW / YMMB)
Sun 03:27:24 AM	-37.4275	146.4953	→ 106°	564.0	649.0	41000.0	-107 Descending	Aus ATC (ADS-B)
Sun 03:27:34 AM	-37.4345	146.5268	→ 106°	564.0	649.0	41000.0	Level	Aus ATC (ADS-B)
Sun 03:27:42 AM	-37.4404	146.5532	→ 106°	564.0	649.0	41000.0	Level	Aus ATC (ADS-B)
Sun 03:27:50 AM	-37.4454	146.5753	→ 106°	563.0	648.0	41000.0	Level	FlightAware ADS-B (MBW / YMMB)
Sun 03:28:14 AM	-37.4629	146.6525	→ 106°	563.0	648.0	41000.0	Level	Aus ATC (ADS-B)
Sun 03:28:20 AM	-37.4672	146.6716	→ 106°	562.0	647.0	41000.0	Level	FlightAware ADS-B (MBW / YMMB)
Sun 03:28:24 AM	-37.47	146.6838	→ 107°	562.0	647.0	41000.0	Level	Aus ATC (ADS-B)
Sun 03:28:39 AM	-37.4806	146.7308	→ 106°	560.0	644.0	41000.0	Level	Aus ATC (ADS-B)
Sun 03:28:49 AM	-37.4876	146.7621	→ 106°	560.0	644.0	41000.0	115 Climbing	Aus ATC (ADS-B)
Sun 03:28:52 AM	-37.4891	146.7689	→ 106°	560.0	644.0	41025.0	Level	FlightAware ADS-B (YDPO)
Sun 03:29:22 AM	-37.5101	146.863	→ 105°	560.0	644.0	41000.0	-47 Descending	FlightAware ADS-B (YDPO)
Sun 03:29:24 AM	-37.512	146.8717	→ 105°	560.0	644.0	41000.0	Level	Aus ATC (ADS-B)
Sun 03:29:29 AM	-37.5155	146.8873	→ 106°	560.0	644.0	41000.0	Level	Aus ATC (ADS-B)
Sun 03:29:39 AM	-37.5223	146.9187	→ 105°	561.0	646.0	41000.0	Level	Aus ATC (ADS-B)
Sun 03:29:52 AM	-37.5311	146.958	→ 106°	560.0	644.0	41000.0	Level	FlightAware ADS-B (YAFD)
Sun 03:30:19 AM	-37.5502	147.0441	→ 106°	561.0	646.0	41000.0	Level	Aus ATC (ADS-B)
Sun 03:30:22 AM	-37.5526	147.0548	→ 106°	561.0	646.0	41000.0	Level	Aus ATC (ADS-B)
Sun 03:30:23 AM	-37.5531	147.0573	→ 106°	561.0	646.0	41000.0	Level	FlightAware ADS-B (MEL / YMML)
Sun 03:30:29 AM	-37.5572	147.0755	→ 106°	561.0	646.0	41000.0	Level	Aus ATC (ADS-B)
Sun 03:30:34 AM	-37.5607	147.0912	→ 105°	561.0	646.0	41000.0	Level	Aus ATC (ADS-B)
Sun 03:30:44 AM	-37.5676	147.1225	→ 105°	561.0	646.0	41000.0	Level	Aus ATC (ADS-B)
Sun 03:30:49 AM	-37.571	147.1383	→ 106°	561.0	646.0	41000.0	Level	Aus ATC (ADS-B)
Sun 03:30:54 AM	-37.5745	147.1539	→ 105°	561.0	646.0	41000.0	Level	Aus ATC (ADS-B)
Sun 03:31:04 AM	-37.5814	147.1853	→ 106°	561.0	646.0	41000.0	Level	Aus ATC (ADS-B)
Sun 03:31:09 AM	-37.5849	147.2009	→ 105°	561.0	646.0	41000.0	Level	Aus ATC (ADS-B)
Sun 03:31:19 AM	-37.5918	147.2324	→ 105°	560.0	644.0	41000.0	-94 Descending	Aus ATC (ADS-B)
Sun 03:31:25 AM	-37.5964	147.2536	→ 105°	559.0	643.0	40975.0	Level	FlightAware ADS-B
Sun 03:31:34 AM	-37.602	147.2793	→ 106°	559.0	643.0	41000.0	79 Climbing	Aus ATC (ADS-B)
Sun 03:31:44 AM	-37.6088	147.3106	→ 105°	559.0	643.0	41000.0	Level	Aus ATC (ADS-B)
Sun 03:31:49 AM	-37.6122	147.3262	→ 106°	559.0	643.0	41000.0	Level	Aus ATC (ADS-B)
Sun 03:31:59 AM	-37.619	147.3575	→ 105°	558.0	642.0	41000.0	Level	Aus ATC (ADS-B)
Sun 03:32:04 AM	-37.6224	147.3732	→ 106°	558.0	642.0	41000.0	Level	Aus ATC (ADS-B)
Sun 03:32:09 AM	-37.6258	147.3888	→ 105°	558.0	642.0	41000.0	Level	Aus ATC (ADS-B)
Sun 03:32:19 AM	-37.6327	147.4201	→ 106°	557.0	641.0	41000.0	Level	Aus ATC (ADS-B)
Sun 03:32:24 AM	-37.636	147.4357	→ 105°	557.0	641.0	41000.0	Level	Aus ATC (ADS-B)
Sun 03:32:28 AM	-37.6383	147.4461	→ 105°	558.0	642.0	41000.0	Level	FlightAware ADS-B (CBR / YSCB)
Sun 03:32:58 AM	-37.6591	147.5423	→ 105°	558.0	642.0	41000.0	Level	FlightAware ADS-B (MEL / YMML)
Sun 03:33:28 AM	-37.68	147.6387	→ 105°	558.0	642.0	41000.0	Level	FlightAware ADS-B (YMIG)
Sun 03:33:37 AM	-37.6857	147.6651	→ 105°	557.0	641.0	41000.0	Level	Aus ATC (ADS-B)
Sun 03:33:44 AM	-37.6902	147.6859	→ 105°	557.0	641.0	41000.0	Level	Aus ATC (ADS-B)
Sun 03:33:48 AM	-37.6936	147.7015	→ 105°	557.0	641.0	41000.0	Level	Aus ATC (ADS-B)
Sun 03:33:58 AM	-37.6998	147.7303	→ 105°	557.0	641.0	41000.0	Level	FlightAware ADS-B (YDPO)
Sun 03:34:02 AM	-37.7025	147.7434	→ 105°	557.0	641.0	41000.0	Level	Aus ATC (ADS-B)
Sun 03:34:29 AM	-37.7209	147.829	→ 105°	557.0	641.0	41000.0	Level	FlightAware ADS-B (YTDN)
Sun 03:35:01 AM	-37.7421	147.9288	→ 105°	557.0	641.0	41000.0	Level	FlightAware ADS-B (MEL / YMML)
Sun 03:35:17 AM	-37.7526	147.9783	→ 105°	557.0	641.0	41000.0	Level	Aus ATC (ADS-B)
Sun 03:35:27 AM	-37.7593	148.0096	→ 105°	557.0	641.0	41000.0	Level	Aus ATC (ADS-B)
Sun 03:35:28 AM	-37.7603	148.0146	→ 106°	557.0	641.0	41000.0	375 Climbing	Aus ATC (ADS-B)
Sun 03:35:31 AM	-37.7617	148.0213	→ 105°	557.0	641.0	41025.0	Level	FlightAware ADS-B (BSJ / YBNS)
Sun 03:35:42 AM	-37.7693	148.0565	→ 105°	556.0	640.0	41000.0	-68 Descending	Aus ATC (ADS-B)
Sun 03:35:53 AM	-37.7769	148.0927	→ 105°	555.0	639.0	41000.0	Level	Aus ATC (ADS-B)
Sun 03:35:57 AM	-37.7791	148.1032	→ 105°	555.0	639.0	41000.0	Level	Aus ATC (ADS-B)
Sun 03:36:02 AM	-37.7822	148.118	→ 105°	554.0	638.0	41000.0	Level	FlightAware ADS-B (YTDN)
Sun 03:36:38 AM	-37.8064	148.2332	→ 105°	554.0	638.0	41000.0	Level	Aus ATC (ADS-B)
Sun 03:36:43 AM	-37.8096	148.2488	→ 104°	554.0	638.0	41000.0	Level	Aus ATC (ADS-B)
Sun 03:36:53 AM	-37.8162	148.2801	→ 105°	554.0	638.0	41000.0	Level	Aus ATC (ADS-B)
Sun 03:37:08 AM	-37.8259	148.3269	→ 105°	554.0	638.0	41000.0	Level	Aus ATC (ADS-B)
Sun 03:37:23 AM	-37.8357	148.3737	→ 105°	553.0	636.0	41000.0	Level	Aus ATC (ADS-B)
Sun 03:37:33 AM	-37.8422	148.4048	→ 105°	553.0	636.0	41000.0	Level	Aus ATC (ADS-B)
Sun 03:37:43 AM	-37.8487	148.4361	→ 105°	553.0	636.0	41000.0	Level	Aus ATC (ADS-B)
Sun 03:37:46 AM	-37.8509	148.4466	→ 105°	553.0	636.0	41000.0	Level	Aus ATC (ADS-B)
Sun 03:37:56 AM	-37.8574	148.4778	→ 105°	553.0	636.0	41000.0	Level	Aus ATC (ADS-B)
Sun 03:38:10 AM	-37.8659	148.5193	→ 104°	552.0	635.0	41000.0	Level	FlightAware ADS-B (YTDN)
Sun 03:38:41 AM	-37.8863	148.6182	→ 105°	553.0	636.0	41000.0	Level	Aus ATC (ADS-B)
Sun 03:38:48 AM	-37.8905	148.6388	→ 104°	553.0	636.0	41000.0	Level	Aus ATC (ADS-B)
Sun 03:38:53 AM	-37.8938	148.6544	→ 105°	553.0	636.0	41000.0	Level	Aus ATC (ADS-B)
Sun 03:39:03 AM	-37.9002	148.6856	→ 104°	553.0	636.0	41000.0	Level	Aus ATC (ADS-B)
Sun 03:39:08 AM	-37.9034	148.7012	→ 105°	553.0	636.0	41000.0	Level	Aus ATC (ADS-B)
Sun 03:39:13 AM	-37.9066	148.7169	→ 104°	553.0	636.0	41000.0	Level	Aus ATC (ADS-B)
Sun 03:39:15 AM	-37.9077	148.7223	→ 104°	554.0	638.0	41000.0	Level	FlightAware ADS-B (CBR / YSCB)
Sun 03:39:23 AM	-37.913	148.7481	→ 104°	555.0	639.0	41000.0	Level	Aus ATC (ADS-B)
Sun 03:39:28 AM	-37.9162	148.7638	→ 104°	556.0	640.0	41000.0	Level	Aus ATC (ADS-B)
Sun 03:39:38 AM	-37.9226	148.7952	→ 105°	556.0	640.0	41000.0	Level	Aus ATC (ADS-B)
Sun 03:39:45 AM	-37.9277	148.8203	→ 104°	556.0	640.0	41000.0	Level	FlightAware ADS-B (SXE / YMES)
Sun 03:39:53 AM	-37.9322	148.8424	→ 104°	556.0	640.0	41000.0	Level	Aus ATC (ADS-B)
Sun 03:40:15 AM	-37.9468	148.9139	→ 104°	556.0	640.0	41000.0	Level	FlightAware ADS-B (SXE / YMES)
Sun 03:40:28 AM	-37.9546	148.9524	→ 104°	555.0	639.0	41000.0	Level	Aus ATC (ADS-B)
Sun 03:40:38 AM	-37.961	148.9838	→ 104°	555.0	639.0	41000.0	Level	Aus ATC (ADS-B)
Sun 03:40:43 AM	-37.9642	148.9994	→ 105°	554.0	638.0	41000.0	Level	Aus ATC (ADS-B)
Sun 03:40:46 AM	-37.9664	149.0103	→ 104°	554.0	638.0	41000.0	Level	FlightAware ADS-B (SXE / YMES)
Sun 03:40:53 AM	-37.9706	149.0308	→ 104°	554.0	638.0	41000.0	Level	Aus ATC (ADS-B)
Sun 03:41:19 AM	-37.9873	149.1141	→ 104°	554.0	638.0	41000.0	Level	FlightAware ADS-B (CBR / YSCB)
Sun 03:41:33 AM	-37.9957	149.1563	→ 104°	554.0	638.0	41000.0	Level	Aus ATC (ADS-B)
Sun 03:41:43 AM	-38.002	149.1877	→ 104°	554.0	638.0	41000.0	Level	Aus ATC (ADS-B)
Sun 03:41:48 AM	-38.0052	149.2034	→ 105°	554.0	638.0	41000.0	Level	Aus ATC (ADS-B)
Sun 03:41:58 AM	-38.0115	149.2347	→ 104°	554.0	638.0	41000.0	Level	Aus ATC (ADS-B)
Sun 03:42:03 AM	-38.0145	149.2504	→ 104°	553.0	636.0	41000.0	Level	Aus ATC (ADS-B)
Sun 03:42:08 AM	-38.0176	149.2661	→ 104°	554.0	638.0	41000.0	Level	Aus ATC (ADS-B)
Sun 03:42:18 AM	-38.0238	149.2975	→ 104°	554.0	638.0	41000.0	Level	Aus ATC (ADS-B)
Sun 03:42:21 AM	-38.0262	149.3099	→ 104°	555.0	639.0	41000.0	Level	FlightAware ADS-B (BSJ / YBNS)
Sun 03:42:33 AM	-38.0331	149.3447	→ 104°	555.0	639.0	41000.0	Level	Aus ATC (ADS-B)
Sun 03:42:48 AM	-38.0425	149.3919	→ 104°	555.0	639.0	41000.0	Level	Aus ATC (ADS-B)
Sun 03:42:53 AM	-38.0465	149.4114	→ 104°	556.0	640.0	41000.0	Level	FlightAware ADS-B (SXE / YMES)
Sun 03:42:58 AM	-38.0489	149.4234	→ 104°	556.0	640.0	41000.0	Level	Aus ATC (ADS-B)
Sun 03:43:03 AM	-38.052	149.4391	→ 104°	556.0	640.0	41000.0	Level	Aus ATC (ADS-B)
Sun 03:43:13 AM	-38.0583	149.4707	→ 104°	555.0	639.0	41000.0	Level	Aus ATC (ADS-B)
Sun 03:43:17 AM	-38.0614	149.4865	→ 104°	555.0	639.0	41000.0	Level	Aus ATC (ADS-B)
Sun 03:43:22 AM	-38.0645	149.5022	→ 104°	555.0	639.0	41000.0	Level	Aus ATC (ADS-B)
Sun 03:43:31 AM	-38.0693	149.5267	→ 104°	556.0	640.0	41000.0	Level	FlightAware ADS-B (YDPO)
Sun 03:43:32 AM	-38.0707	149.5337	→ 105°	556.0	640.0	41000.0	Level	Aus ATC (ADS-B)
Sun 03:43:37 AM	-38.0738	149.5495	→ 104°	556.0	640.0	41000.0	Level	Aus ATC (ADS-B)
Sun 03:43:47 AM	-38.0801	149.581	→ 104°	556.0	640.0	41000.0	Level	Aus ATC (ADS-B)
Sun 03:43:57 AM	-38.0863	149.6126	→ 104°	557.0	641.0	41000.0	Level	Aus ATC (ADS-B)
Sun 03:44:01 AM	-38.0882	149.6222	→ 104°	557.0	641.0	41000.0	Level	FlightAware ADS-B (CBR / YSCB)
Sun 03:44:02 AM	-38.0894	149.6283	→ 104°	557.0	641.0	41000.0	Level	Aus ATC (ADS-B)
Sun 03:44:12 AM	-38.0957	149.6599	→ 104°	556.0	640.0	41000.0	Level	Aus ATC (ADS-B)
Sun 03:44:27 AM	-38.1049	149.7073	→ 104°	557.0	641.0	41000.0	Level	Aus ATC (ADS-B)
Sun 03:44:34 AM	-38.109	149.7282	→ 104°	557.0	641.0	41000.0	Level	FlightAware ADS-B (YDPO)
Sun 03:44:37 AM	-38.1111	149.7389	→ 104°	557.0	641.0	41000.0	Level	Aus ATC (ADS-B)
Sun 03:44:42 AM	-38.1142	149.7547	→ 104°	556.0	640.0	41000.0	Level	Aus ATC (ADS-B)
Sun 03:45:05 AM	-38.1275	149.8232	→ 104°	556.0	640.0	41000.0	Level	FlightAware ADS-B (CBR / YSCB)
Sun 03:45:32 AM	-38.1449	149.9127	→ 104°	555.0	639.0	41000.0	Level	Aus ATC (ADS-B)
Sun 03:45:38 AM	-38.1482	149.9302	→ 104°	555.0	639.0	41000.0	Level	FlightAware ADS-B (CBR / YSCB)
Sun 03:45:42 AM	-38.151	149.9442	→ 104°	555.0	639.0	41000.0	Level	Aus ATC (ADS-B)
Sun 03:45:57 AM	-38.1601	149.9915	→ 104°	555.0	639.0	41000.0	Level	Aus ATC (ADS-B)
Sun 03:46:07 AM	-38.1661	150.0231	→ 104°	554.0	638.0	41000.0	Level	Aus ATC (ADS-B)
Sun 03:46:12 AM	-38.1691	150.0388	→ 104°	555.0	639.0	41000.0	Level	Aus ATC (ADS-B)
Sun 03:46:22 AM	-38.1752	150.0704	→ 104°	555.0	639.0	41000.0	Level	Aus ATC (ADS-B)
Sun 03:46:27 AM	-38.1783	150.0862	→ 104°	555.0	639.0	41000.0	Level	Aus ATC (ADS-B)
Sun 03:46:32 AM	-38.1813	150.102	→ 104°	555.0	639.0	41000.0	Level	Aus ATC (ADS-B)
Sun 03:46:42 AM	-38.1874	150.1334	→ 104°	554.0	638.0	41000.0	Level	Aus ATC (ADS-B)
Sun 03:46:47 AM	-38.1903	150.1492	→ 103°	554.0	638.0	41000.0	Level	Aus ATC (ADS-B)
Sun 03:46:51 AM	-38.1924	150.1599	→ 104°	555.0	639.0	41000.0	Level	FlightAware ADS-B (SXE / YMES)
Sun 03:46:57 AM	-38.1964	150.1807	→ 104°	553.0	636.0	41000.0	Level	Aus ATC (ADS-B)
Sun 03:47:21 AM	-38.2105	150.2551	→ 103°	554.0	638.0	41000.0	Level	FlightAware ADS-B (SXE / YMES)
Sun 03:47:57 AM	-38.227	150.3705	→ 98°	550.0	633.0	41000.0	Level	FlightAware ADS-B (SXE / YMES)
Sun 03:48:27 AM	-38.2355	150.4671	→ 96°	550.0	633.0	41000.0	Level	Aus ATC (ADS-B)
Sun 03:48:35 AM	-38.2376	150.4918	→ 96°	550.0	633.0	41000.0	Level	FlightAware ADS-B (YGDO)
Sun 03:48:37 AM	-38.2382	150.4992	→ 96°	550.0	633.0	41000.0	Level	Aus ATC (ADS-B)
Sun 03:48:42 AM	-38.2395	150.5152	→ 96°	550.0	633.0	41000.0	Level	Aus ATC (ADS-B)
Sun 03:48:52 AM	-38.2421	150.5473	→ 96°	550.0	633.0	41000.0	240 Climbing	Aus ATC (ADS-B)
Sun 03:49:07 AM	-38.2459	150.5954	→ 96°	549.0	632.0	41100.0	Level	Aus ATC (ADS-B)
Sun 03:49:17 AM	-38.2484	150.6273	→ 96°	549.0	632.0	41000.0	-400 Descending	Aus ATC (ADS-B)
Sun 03:49:22 AM	-38.2497	150.6433	→ 96°	550.0	633.0	41000.0	Level	Aus ATC (ADS-B)
Sun 03:49:32 AM	-38.2521	150.6744	→ 96°	549.0	632.0	41000.0	Level	Aus ATC (ADS-B)
Sun 03:49:37 AM	-38.2534	150.6903	→ 96°	549.0	632.0	41000.0	Level	Aus ATC (ADS-B)
Sun 03:49:42 AM	-38.2547	150.7063	→ 96°	549.0	632.0	41000.0	Level	Aus ATC (ADS-B)
Sun 03:49:52 AM	-38.2571	150.7384	→ 95°	550.0	633.0	41000.0	Level	Aus ATC (ADS-B)
Sun 03:49:57 AM	-38.2584	150.7544	→ 96°	550.0	633.0	41000.0	-150 Descending	Aus ATC (ADS-B)
Sun 03:50:02 AM	-38.2598	150.7716	→ 96°	550.0	633.0	40975.0	Level	FlightAware ADS-B (SXE / YMES)
Sun 03:50:07 AM	-38.261	150.7865	→ 96°	550.0	633.0	41000.0	79 Climbing	Aus ATC (ADS-B)
Sun 03:50:21 AM	-38.2647	150.8345	→ 96°	549.0	632.0	41000.0	Level	Aus ATC (ADS-B)
Sun 03:50:31 AM	-38.2672	150.8665	→ 96°	549.0	632.0	41000.0	Level	Aus ATC (ADS-B)
Sun 03:50:36 AM	-38.2685	150.8825	→ 96°	549.0	632.0	41000.0	-136 Descending	Aus ATC (ADS-B)
Sun 03:50:42 AM	-38.2699	150.9001	→ 96°	548.0	631.0	40975.0	Level	FlightAware ADS-B (SXE / YMES)
Sun 03:50:46 AM	-38.271	150.9145	→ 96°	548.0	631.0	41000.0	167 Climbing	Aus ATC (ADS-B)
Sun 03:50:51 AM	-38.2722	150.9305	→ 95°	548.0	631.0	41000.0	Level	Aus ATC (ADS-B)
Sun 03:50:56 AM	-38.2735	150.9464	→ 96°	548.0	631.0	41000.0	Level	Aus ATC (ADS-B)
Sun 03:51:06 AM	-38.2759	150.9783	→ 95°	547.0	629.0	41000.0	Level	Aus ATC (ADS-B)
Sun 03:51:11 AM	-38.2771	150.9942	→ 96°	547.0	629.0	41000.0	Level	Aus ATC (ADS-B)
Sun 03:51:13 AM	-38.2774	150.9976	→ 96°	547.0	629.0	41000.0	Level	FlightAware ADS-B (SXE / YMES)
Sun 03:51:21 AM	-38.2796	151.0262	→ 96°	548.0	631.0	41000.0	Level	Aus ATC (ADS-B)
Sun 03:51:36 AM	-38.2833	151.0741	→ 96°	548.0	631.0	41000.0	Level	Aus ATC (ADS-B)
Sun 03:51:51 AM	-38.287	151.1219	→ 96°	547.0	629.0	41000.0	Level	Aus ATC (ADS-B)
Sun 03:52:01 AM	-38.2894	151.1537	→ 95°	546.0	628.0	41000.0	Level	Aus ATC (ADS-B)
Sun 03:52:06 AM	-38.2907	151.1697	→ 96°	546.0	628.0	41000.0	Level	Aus ATC (ADS-B)
Sun 03:52:41 AM	-38.2995	151.2809	→ 96°	544.0	626.0	41000.0	Level	Aus ATC (ADS-B)
Sun 03:52:51 AM	-38.3017	151.3127	→ 95°	544.0	626.0	41000.0	Level	Aus ATC (ADS-B)
Sun 03:53:06 AM	-38.305	151.3604	→ 95°	544.0	626.0	41000.0	Level	Aus ATC (ADS-B)
Sun 03:53:41 AM	-38.3161	151.4711	→ 97°	545.0	627.0	41000.0	Level	Aus ATC (ADS-B)
Sun 03:53:46 AM	-38.3192	151.4867	→ 104°	545.0	627.0	41000.0	Level	Aus ATC (ADS-B)
Sun 03:53:56 AM	-38.3258	151.5176	→ 105°	546.0	628.0	41000.0	Level	Aus ATC (ADS-B)
Sun 03:54:01 AM	-38.3293	151.533	→ 107°	545.0	627.0	41000.0	Level	Aus ATC (ADS-B)
Sun 03:54:06 AM	-38.3327	151.5483	→ 106°	545.0	627.0	41000.0	Level	Aus ATC (ADS-B)
Sun 03:55:51 AM	-38.3991	151.8733	→ 105°	544.0	626.0	41000.0	Level	Aus ATC (ADS-B)
Sun 03:56:01 AM	-38.4049	151.9044	→ 103°	544.0	626.0	41000.0	Level	Aus ATC (ADS-B)
Sun 03:56:06 AM	-38.4076	151.92	→ 102°	544.0	626.0	41000.0	Level	Aus ATC (ADS-B)
Sun 03:56:16 AM	-38.4131	151.9513	→ 103°	545.0	627.0	41000.0	Level	Aus ATC (ADS-B)
Sun 03:56:21 AM	-38.4158	151.9669	→ 102°	545.0	627.0	41000.0	Level	Aus ATC (ADS-B)
Sun 03:56:31 AM	-38.4215	151.9981	→ 103°	545.0	627.0	41000.0	Level	Aus ATC (ADS-B)
Sun 03:56:46 AM	-38.43	152.0446	→ 103°	544.0	626.0	41000.0	Level	Aus ATC (ADS-B)
Sun 03:56:56 AM	-38.4357	152.0758	→ 103°	545.0	627.0	41000.0	Level	Aus ATC (ADS-B)
Sun 03:57:11 AM	-38.4442	152.1226	→ 103°	544.0	626.0	41000.0	Level	Aus ATC (ADS-B)
Sun 03:57:21 AM	-38.45	152.1537	→ 104°	544.0	626.0	41000.0	Level	Aus ATC (ADS-B)
Sun 03:57:26 AM	-38.4529	152.1694	→ 104°	544.0	626.0	41000.0	Level	Aus ATC (ADS-B)
Sun 03:57:36 AM	-38.4588	152.2003	→ 104°	544.0	626.0	41000.0	Level	Aus ATC (ADS-B)
Sun 03:57:41 AM	-38.4617	152.2156	→ 103°	544.0	626.0	41000.0	Level	Aus ATC (ADS-B)
Sun 03:57:46 AM	-38.4647	152.2314	→ 104°	543.0	625.0	41000.0	Level	Aus ATC (ADS-B)
Sun 03:57:56 AM	-38.4707	152.2625	→ 104°	543.0	625.0	41000.0	Level	Aus ATC (ADS-B)
Sun 03:58:01 AM	-38.4737	152.2779	→ 104°	543.0	625.0	41000.0	Level	Aus ATC (ADS-B)
Sun 03:58:11 AM	-38.48	152.3087	→ 105°	543.0	625.0	41000.0	Level	Aus ATC (ADS-B)
Sun 03:58:26 AM	-38.4894	152.3551	→ 105°	543.0	625.0	41000.0	Level	Aus ATC (ADS-B)
Sun 03:58:31 AM	-38.4925	152.3702	→ 105°	543.0	625.0	41000.0	Level	Aus ATC (ADS-B)
Sun 03:58:36 AM	-38.4958	152.386	→ 105°	543.0	625.0	41000.0	Level	Aus ATC (ADS-B)
Sun 03:58:47 AM	-38.5022	152.4169	→ 105°	543.0	625.0	41000.0	Level	Aus ATC (ADS-B)
Sun 03:58:51 AM	-38.5053	152.432	→ 105°	543.0	625.0	41000.0	Level	Aus ATC (ADS-B)
Sun 03:59:01 AM	-38.5116	152.4628	→ 105°	543.0	625.0	41000.0	Level	Aus ATC (ADS-B)
Sun 03:59:31 AM	-38.5247	152.5565	→ 100°	541.0	623.0	41000.0	Level	Aus ATC (ADS-B)
Sun 03:59:46 AM	-38.5298	152.6043	→ 98°	540.0	621.0	41000.0	Level	Aus ATC (ADS-B)
Sun 03:59:56 AM	-38.5334	152.6352	→ 98°	540.0	621.0	41000.0	Level	Aus ATC (ADS-B)
Sun 04:00:01 AM	-38.5355	152.6514	→ 99°	540.0	621.0	41000.0	Level	Aus ATC (ADS-B)
Sun 04:00:06 AM	-38.5374	152.6673	→ 99°	540.0	621.0	41000.0	Level	Aus ATC (ADS-B)
Sun 04:00:16 AM	-38.5412	152.6981	→ 99°	540.0	621.0	41000.0	Level	Aus ATC (ADS-B)
Sun 04:00:31 AM	-38.5461	152.7459	→ 98°	540.0	621.0	41000.0	Level	Aus ATC (ADS-B)
Sun 04:00:45 AM	-38.551	152.7922	→ 98°	540.0	621.0	41000.0	Level	Aus ATC (ADS-B)
Sun 04:01:20 AM	-38.563	152.9028	→ 98°	537.0	618.0	41000.0	Level	Aus ATC (ADS-B)
Sun 04:01:25 AM	-38.5645	152.9185	→ 97°	536.0	617.0	41000.0	Level	Aus ATC (ADS-B)
Sun 04:01:35 AM	-38.5675	152.9497	→ 97°	536.0	617.0	41000.0	Level	Aus ATC (ADS-B)
Sun 04:01:40 AM	-38.5689	152.965	→ 97°	536.0	617.0	41000.0	Level	Aus ATC (ADS-B)
Sun 04:01:45 AM	-38.5705	152.9812	→ 97°	536.0	617.0	41000.0	Level	Aus ATC (ADS-B)
Sun 04:01:55 AM	-38.5734	153.0121	→ 97°	536.0	617.0	41000.0	Level	Aus ATC (ADS-B)
Sun 04:02:00 AM	-38.5749	153.0274	→ 97°	536.0	617.0	41000.0	Level	Aus ATC (ADS-B)
Sun 04:02:10 AM	-38.5782	153.0594	→ 97°	536.0	617.0	41000.0	Level	Aus ATC (ADS-B)
Sun 04:02:25 AM	-38.5827	153.1062	→ 97°	536.0	617.0	41000.0	Level	Aus ATC (ADS-B)
Sun 04:02:35 AM	-38.5857	153.1369	→ 97°	536.0	617.0	41000.0	Level	Aus ATC (ADS-B)
Sun 04:09:00 AM	-38.6112	154.3545	→ 91°	539.0	620.0	41000.0	Level	Aus ATC (ADS-B)
Sun 04:09:05 AM	-38.6113	154.3704	→ 91°	539.0	620.0	41000.0	Level	Aus ATC (ADS-B)
Sun 04:09:40 AM	-38.6122	154.4816	→ 91°	540.0	621.0	41000.0	Level	Aus ATC (ADS-B)
Sun 04:09:45 AM	-38.6124	154.4974	→ 91°	540.0	621.0	41000.0	Level	Aus ATC (ADS-B)
Sun 04:09:50 AM	-38.6126	154.5134	→ 91°	540.0	621.0	41000.0	Level	Aus ATC (ADS-B)
Sun 04:10:05 AM	-38.6133	154.5609	→ 91°	540.0	621.0	41000.0	Level	Aus ATC (ADS-B)
Sun 04:10:15 AM	-38.6137	154.5926	→ 91°	539.0	620.0	41000.0	Level	Aus ATC (ADS-B)
Sun 04:10:20 AM	-38.614	154.6087	→ 91°	539.0	620.0	41000.0	Level	Aus ATC (ADS-B)
Sun 04:10:30 AM	-38.6145	154.6405	→ 91°	538.0	619.0	41000.0	Level	Aus ATC (ADS-B)
Sun 04:10:35 AM	-38.6147	154.6563	→ 91°	538.0	619.0	41000.0	Level	Aus ATC (ADS-B)
Sun 04:10:40 AM	-38.615	154.6721	→ 91°	538.0	619.0	41000.0	Level	Aus ATC (ADS-B)
Sun 04:10:45 AM	-38.6152	154.688	→ 91°	538.0	619.0	41000.0	Level	Aus ATC (ADS-B)
Sun 04:10:55 AM	-38.6157	154.7197	→ 91°	538.0	619.0	41000.0	Level	Aus ATC (ADS-B)
Sun 04:10:59 AM	-38.6159	154.7355	→ 91°	538.0	619.0	41000.0	Level	Aus ATC (ADS-B)
Sun 04:11:04 AM	-38.6161	154.7514	→ 91°	538.0	619.0	41000.0	Level	Aus ATC (ADS-B)
Sun 04:11:14 AM	-38.6164	154.783	→ 91°	537.0	618.0	41000.0	Level	Aus ATC (ADS-B)
Sun 04:11:19 AM	-38.6167	154.7988	→ 91°	537.0	618.0	41000.0	Level	Aus ATC (ADS-B)
Sun 04:11:29 AM	-38.617	154.8304	→ 91°	537.0	618.0	41000.0	Level	Aus ATC (ADS-B)
Sun 04:11:44 AM	-38.6175	154.8778	→ 91°	536.0	617.0	41000.0	Level	Aus ATC (ADS-B)
Sun 04:11:55 AM	-38.6178	154.9093	→ 91°	536.0	617.0	41000.0	Level	Aus ATC (ADS-B)
Sun 04:11:59 AM	-38.618	154.9251	→ 91°	536.0	617.0	41000.0	Level	Aus ATC (ADS-B)
Sun 04:12:09 AM	-38.6183	154.9568	→ 91°	536.0	617.0	41000.0	Level	Aus ATC (ADS-B)
Sun 04:12:14 AM	-38.6184	154.9726	→ 90°	536.0	617.0	41000.0	Level	Aus ATC (ADS-B)
Sun 04:12:19 AM	-38.6186	154.9884	→ 91°	535.0	616.0	41000.0	Level	Aus ATC (ADS-B)
Sun 04:12:29 AM	-38.6187	155.0198	→ 90°	535.0	616.0	41000.0	Level	Aus ATC (ADS-B)
Sun 04:12:34 AM	-38.6188	155.0356	→ 91°	535.0	616.0	41000.0	Level	Aus ATC (ADS-B)
Sun 04:12:44 AM	-38.619	155.0671	→ 90°	535.0	616.0	41000.0	Level	Aus ATC (ADS-B)
Sun 04:12:49 AM	-38.6192	155.0829	→ 91°	535.0	616.0	41000.0	Level	Aus ATC (ADS-B)
Sun 04:12:59 AM	-38.6194	155.1142	→ 91°	536.0	617.0	41000.0	Level	Aus ATC (ADS-B)
Sun 04:13:14 AM	-38.6198	155.1618	→ 91°	535.0	616.0	41000.0	Level	Aus ATC (ADS-B)
Sun 04:13:24 AM	-38.62	155.1932	→ 91°	535.0	616.0	41000.0	Level	Aus ATC (ADS-B)
Sun 04:13:29 AM	-38.6201	155.2086	→ 91°	535.0	616.0	41000.0	Level	Aus ATC (ADS-B)
Sun 04:13:39 AM	-38.6204	155.2405	→ 91°	535.0	616.0	41000.0	Level	Aus ATC (ADS-B)
Sun 04:13:44 AM	-38.6205	155.2563	→ 91°	535.0	616.0	41000.0	Level	Aus ATC (ADS-B)
Sun 04:13:49 AM	-38.6207	155.272	→ 91°	535.0	616.0	41000.0	Level	Aus ATC (ADS-B)
Sun 04:13:59 AM	-38.621	155.3032	→ 91°	535.0	616.0	41000.0	Level	Aus ATC (ADS-B)
Sun 04:14:24 AM	-38.6217	155.3656	→ 91°	535.0	616.0	41000.0	Level	Aus ATC (ADS-B)
Sun 05:36:00 AM	-38.1785	170.1008	→ 84°	497.0	572.0	41000.0	Level	FlightAware ADS-B (NZRW)
Sun 05:37:38 AM	-38.1533	170.3845	→ 84°	497.0	572.0	41000.0	Level	FlightAware ADS-B (AKL / NZAA)
Sun 05:38:14 AM	-38.1441	170.4874	→ 84°	496.0	571.0	41000.0	Level	FlightAware ADS-B (NZRW)
Sun 05:38:51 AM	-38.1343	170.5944	→ 83°	497.0	572.0	41000.0	Level	FlightAware ADS-B (PPQ / NZPP)
Sun 05:39:32 AM	-38.1234	170.7119	→ 83°	496.0	571.0	41000.0	Level	FlightAware ADS-B (AKL / NZAA)
Sun 05:40:05 AM	-38.114	170.8084	→ 81°	495.0	570.0	41000.0	Level	FlightAware ADS-B (AKL / NZAA)
Sun 05:40:25 AM	-38.1039	170.863	→ 74°	498.0	573.0	41000.0	Level	FlightAware ADS-B (AKL / NZAA)
Sun 05:41:11 AM	-38.0622	170.9924	→ 66°	503.0	579.0	41000.0	Level	FlightAware ADS-B (NZRW)
Sun 05:41:45 AM	-38.0301	171.0817	↗ 65°	505.0	581.0	41000.0	Level	FlightAware ADS-B (AKL / NZAA)
Sun 05:42:15 AM	-38.0013	171.1617	→ 66°	506.0	582.0	41000.0	Level	FlightAware ADS-B (AKL / NZAA)
Sun 05:42:45 AM	-37.9716	171.2441	→ 66°	505.0	581.0	41000.0	Level	FlightAware ADS-B (AKL / NZAA)
Sun 05:43:16 AM	-37.9428	171.3242	→ 66°	504.0	580.0	41000.0	Level	FlightAware ADS-B (AKL / NZAA)
Sun 05:43:46 AM	-37.9131	171.4065	→ 66°	504.0	580.0	41000.0	Level	FlightAware ADS-B (AKL / NZAA)
Sun 05:44:16 AM	-37.8844	171.4858	→ 66°	504.0	580.0	41000.0	Level	FlightAware ADS-B (AKL / NZAA)
Sun 05:44:46 AM	-37.855	171.5671	↗ 65°	504.0	580.0	41000.0	Level	FlightAware ADS-B (AKL / NZAA)
Sun 05:45:16 AM	-37.8256	171.6477	↗ 65°	504.0	580.0	41000.0	Level	FlightAware ADS-B (AKL / NZAA)
Sun 05:45:46 AM	-37.796	171.7285	↗ 65°	503.0	579.0	41000.0	Level	FlightAware ADS-B (AKL / NZAA)
Sun 05:46:16 AM	-37.7671	171.8078	↗ 65°	502.0	578.0	41000.0	Level	FlightAware ADS-B (PMR / NZPM)
Sun 05:46:48 AM	-37.7355	171.8939	↗ 65°	501.0	577.0	41000.0	Level	FlightAware ADS-B (AKL / NZAA)
Sun 05:47:18 AM	-37.706	171.9742	↗ 65°	500.0	575.0	41000.0	Level	FlightAware ADS-B (NZPK)
Sun 05:47:52 AM	-37.6724	172.065	↗ 65°	499.0	574.0	41000.0	Level	FlightAware ADS-B (NZPK)
Sun 05:48:23 AM	-37.6427	172.1453	↗ 65°	500.0	575.0	41000.0	Level	FlightAware ADS-B (NZPK)
Sun 05:48:55 AM	-37.6121	172.2279	↗ 65°	497.0	572.0	41000.0	Level	FlightAware ADS-B (AKL / NZAA)
Sun 05:49:25 AM	-37.5827	172.3066	↗ 65°	497.0	572.0	41000.0	Level	FlightAware ADS-B (AKL / NZAA)
Sun 05:49:55 AM	-37.5537	172.3844	↗ 65°	497.0	572.0	41000.0	Level	FlightAware ADS-B (AKL / NZAA)
Sun 05:50:25 AM	-37.5235	172.4651	↗ 65°	495.0	570.0	41000.0	-541 Descending	FlightAware ADS-B (AKL / NZAA)
Sun 05:50:56 AM	-37.4943	172.543	↗ 65°	488.0	562.0	40450.0	-1,839 Descending	FlightAware ADS-B (AKL / NZAA)
Sun 05:51:27 AM	-37.4638	172.6237	↗ 65°	489.0	563.0	39100.0	-2,631 Descending	FlightAware ADS-B (NZPI)
Sun 05:51:57 AM	-37.4347	172.7016	↗ 65°	491.0	565.0	37775.0	-2,750 Descending	FlightAware ADS-B (PPQ / NZPP)
Sun 05:52:27 AM	-37.4057	172.7783	↗ 65°	493.0	567.0	36350.0	-3,050 Descending	FlightAware ADS-B (NZPI)
Sun 05:52:57 AM	-37.3764	172.8557	↗ 65°	499.0	574.0	34725.0	-3,200 Descending	FlightAware ADS-B (NZPI)
Sun 05:53:27 AM	-37.3454	172.9374	↗ 65°	501.0	577.0	33150.0	-2,725 Descending	FlightAware ADS-B (WHK / NZWK)
Sun 05:53:57 AM	-37.3162	173.0137	↗ 65°	494.0	568.0	32000.0	-2,300 Descending	FlightAware ADS-B (NZPI)
Sun 05:54:27 AM	-37.2868	173.0908	↗ 64°	487.0	560.0	30850.0	-2,325 Descending	FlightAware ADS-B (NZWP)
Sun 05:54:57 AM	-37.2575	173.167	↗ 64°	480.0	552.0	29675.0	-2,375 Descending	FlightAware ADS-B (NZWP)
Sun 05:55:27 AM	-37.2295	173.2402	↗ 65°	473.0	544.0	28475.0	-2,325 Descending	FlightAware ADS-B (AKL / NZAA)
Sun 05:55:57 AM	-37.2015	173.3129	↗ 64°	467.0	537.0	27350.0	-2,275 Descending	FlightAware ADS-B (AKL / NZAA)
Sun 05:56:27 AM	-37.1719	173.3896	↗ 64°	461.0	531.0	26200.0	-2,220 Descending	FlightAware ADS-B (NZWP)
Sun 05:56:47 AM	-37.1562	173.4359	→ 70°	454.0	522.0	25500.0	-2,171 Descending	FlightAware ADS-B (AKL / NZAA)
Sun 05:57:05 AM	-37.1452	173.4799	→ 74°	451.0	519.0	24825.0	-2,271 Descending	FlightAware ADS-B (TRG / NZTG)
Sun 05:57:22 AM	-37.1373	173.5227	→ 79°	446.0	513.0	24175.0	-2,289 Descending	FlightAware ADS-B (AKL / NZAA)
Sun 05:58:02 AM	-37.1205	173.6236	→ 79°	440.0	506.0	22650.0	-2,271 Descending	FlightAware ADS-B (AKL / NZAA)
Sun 05:58:32 AM	-37.1083	173.6983	→ 79°	435.0	501.0	21525.0	-2,275 Descending	FlightAware ADS-B (AKL / NZAA)
Sun 05:59:02 AM	-37.0962	173.7722	→ 78°	430.0	495.0	20375.0	-2,250 Descending	FlightAware ADS-B (AKL / NZAA)
Sun 05:59:32 AM	-37.0841	173.8444	→ 78°	423.0	487.0	19275.0	-2,225 Descending	FlightAware ADS-B (AKL / NZAA)
Sun 06:00:02 AM	-37.072	173.9164	→ 78°	418.0	481.0	18150.0	-2,250 Descending	FlightAware ADS-B (AKL / NZAA)
Sun 06:00:32 AM	-37.0599	173.9884	→ 78°	413.0	475.0	17025.0	-2,175 Descending	FlightAware ADS-B (AKL / NZAA)
Sun 06:01:02 AM	-37.0485	174.0557	→ 78°	409.0	471.0	15975.0	-1,850 Descending	FlightAware ADS-B (AKL / NZAA)
Sun 06:01:32 AM	-37.0367	174.1255	→ 78°	397.0	457.0	15175.0	-1,550 Descending	FlightAware ADS-B (NZPK)
Sun 06:02:02 AM	-37.0256	174.1906	→ 78°	387.0	445.0	14425.0	-1,721 Descending	FlightAware ADS-B (NZPK)
Sun 06:02:33 AM	-37.0145	174.2558	→ 78°	374.0	430.0	13425.0	-1,967 Descending	FlightAware ADS-B (NZPK)
Sun 06:03:03 AM	-37.0035	174.3204	→ 78°	369.0	425.0	12425.0	-2,050 Descending	FlightAware ADS-B (NZPK)
Sun 06:03:33 AM	-36.9931	174.3814	→ 78°	357.0	411.0	11375.0	-1,943 Descending	FlightAware ADS-B (AKL / NZAA)
Sun 06:04:04 AM	-36.9816	174.4441	→ 75°	344.0	396.0	10450.0	-1,205 Descending	FlightAware ADS-B (AKL / NZAA)
Sun 06:04:34 AM	-36.9674	174.5	→ 71°	322.0	371.0	10150.0	-529 Descending	FlightAware ADS-B (AKL / NZAA)
Sun 06:04:55 AM	-36.9577	174.5356	→ 71°	306.0	352.0	10000.0	-853 Descending	FlightAware ADS-B (NZMB)
Sun 06:05:25 AM	-36.9442	174.5847	→ 71°	298.0	343.0	9425.0	-1,250 Descending	FlightAware ADS-B (NZWP)
Sun 06:05:55 AM	-36.9308	174.6335	→ 71°	294.0	338.0	8750.0	-1,275 Descending	FlightAware ADS-B (NZWP)
Sun 06:06:25 AM	-36.9177	174.681	→ 71°	285.0	328.0	8150.0	-1,300 Descending	FlightAware ADS-B (NZWP)
Sun 06:06:55 AM	-36.905	174.7263	→ 72°	280.0	322.0	7450.0	-1,345 Descending	FlightAware ADS-B (NZWP)
Sun 06:07:23 AM	-36.8968	174.7692	→ 80°	276.0	318.0	6850.0	-1,330 Descending	FlightAware ADS-B (AKL / NZAA)
Sun 06:07:39 AM	-36.8931	174.7955	→ 80°	274.0	315.0	6475.0	-1,239 Descending	FlightAware ADS-B
Sun 06:08:09 AM	-36.8869	174.8389	→ 80°	272.0	313.0	5900.0	-1,275 Descending	FlightAware ADS-B (NZPK)
Sun 06:08:39 AM	-36.8798	174.8894	→ 80°	272.0	313.0	5200.0	-1,337 Descending	FlightAware ADS-B
Sun 06:08:55 AM	-36.8764	174.9133	→ 80°	272.0	313.0	4875.0	-1,109 Descending	FlightAware ADS-B (AKL / NZAA)
Sun 06:09:25 AM	-36.8696	174.9606	→ 81°	265.0	305.0	4350.0	-796 Descending	FlightAware ADS-B (NZWP)
Sun 06:09:44 AM	-36.8716	174.9873	→ 106°	242.0	278.0	4225.0	-514 Descending	FlightAware ADS-B
Sun 06:10:00 AM	-36.88	175.005	↘ 130°	222.0	255.0	4050.0	-900 Descending	FlightAware ADS-B (NZWP)
Sun 06:10:19 AM	-36.895	175.0182	↘ 154°	210.0	242.0	3700.0	-1,029 Descending	FlightAware ADS-B (RAG / NZRA)
Sun 06:10:35 AM	-36.9104	175.0252	↓ 160°	203.0	234.0	3450.0	-797 Descending	FlightAware ADS-B (NZWP)
Sun 06:10:51 AM	-36.9249	175.0301	↓ 174°	194.0	223.0	3275.0	-409 Descending	FlightAware ADS-B (AKL / NZAA)
Sun 06:11:08 AM	-36.9378	175.0274	↙ 203°	174.0	200.0	3225.0	-292 Descending	FlightAware ADS-B (AKL / NZAA)
Sun 06:11:27 AM	-36.9479	175.0147	↙ 241°	163.0	188.0	3100.0	-314 Descending	FlightAware ADS-B (AKL / NZAA)
Sun 06:11:51 AM	-36.9546	174.9927	← 251°	160.0	184.0	3000.0	-525 Descending	FlightAware ADS-B (AKL / NZAA)
Sun 06:12:07 AM	-36.9586	174.9788	← 251°	163.0	188.0	2750.0	-891 Descending	FlightAware ADS-B (AKL / NZAA)
Sun 06:12:23 AM	-36.9623	174.9656	← 252°	162.0	186.0	2525.0	-891 Descending	FlightAware ADS-B (AKL / NZAA)
Sun 06:12:39 AM	-36.9663	174.9511	← 251°	158.0	182.0	2275.0	-797 Descending	FlightAware ADS-B (NZPI)
Sun 06:12:55 AM	-36.9699	174.9385	← 251°	147.0	169.0	2100.0	-703 Descending	FlightAware ADS-B (AKL / NZAA)
Sun 06:13:11 AM	-36.9736	174.9248	← 252°	139.0	160.0	1900.0	-750 Descending	FlightAware ADS-B (AKL / NZAA)
Sun 06:13:27 AM	-36.9767	174.9139	← 251°	139.0	160.0	1700.0	-750 Descending	FlightAware ADS-B (AKL / NZAA)
Sun 06:13:45 AM	-36.9806	174.8997	← 251°	127.0	146.0	1475.0	-670 Descending	FlightAware ADS-B (NZPI)
Sun 06:14:14 AM	-36.9859	174.8807	← 252°	119.0	137.0	1175.0	-600 Descending	FlightAware ADS-B (AKL / NZAA)
Sun 06:14:30 AM	-36.9886	174.8708	← 252°	117.0	135.0	1025.0	-609 Descending	FlightAware ADS-B
Sun 06:14:46 AM	-36.9916	174.8601	← 251°	117.0	135.0	850.0	-656 Descending	FlightAware ADS-B (AKL / NZAA)
Sun 06:15:02 AM	-36.9946	174.8491	← 251°	118.0	136.0	675.0	-609 Descending	FlightAware ADS-B (NZWP)
Sun 06:15:18 AM	-36.9973	174.8397	← 251°	118.0	136.0	525.0	-563 Descending	FlightAware ADS-B (AKL / NZAA)
