# Supplementary material for: TrackMatcher – a tool for finding intercepts in tracks of geographical positions
Source: Copernicus journal article supplement (doi:10.5194/gmd-15-7557-2022), 2022-10-18
Supplement: Supplementary file 1 [file gmd-15-7557-2022-supplement.zip › ESM/example/data/flights/ANZ192_28-JAN-2019_YPAD-NZAA.dat]

Time (CET)	Latitude	Longitude	Course	kts	mph	feet	Rate	Reporting Facility
Mon 02:51:44 AM	-34.962	138.5121	↙ 230°	168.0	193.0	450.0	Level	FlightAware ADS-B (PAL / YPPF)
Mon 02:51:44 AM	-34.962	138.512	↙ 230°	168.0	193.0	450.0	1,875 Climbing	FlightAware ADS-B (PAL / YPPF)
Mon 02:52:00 AM	-34.9694	138.5014	↙ 230°	173.0	199.0	950.0	1,688 Climbing	FlightAware ADS-B (ADL / YPAD)
Mon 02:52:16 AM	-34.9781	138.4886	↙ 230°	187.0	215.0	1350.0	1,125 Climbing	FlightAware ADS-B (ADL / YPAD)
Mon 02:52:32 AM	-34.9875	138.4748	↙ 230°	214.0	246.0	1550.0	1,134 Climbing	FlightAware ADS-B (ADL / YPAD)
Mon 02:52:57 AM	-35.005	138.4494	↙ 230°	242.0	278.0	2125.0	2,054 Climbing	FlightAware ADS-B (ADL / YPAD)
Mon 02:53:18 AM	-35.0208	138.4276	↙ 225°	243.0	280.0	3125.0	2,577 Climbing	FlightAware ADS-B (ADL / YPAD)
Mon 02:53:36 AM	-35.0394	138.4187	↓ 185°	252.0	290.0	3800.0	2,486 Climbing	FlightAware ADS-B (ADL / YPAD)
Mon 02:53:53 AM	-35.0592	138.4248	↘ 155°	250.0	288.0	4575.0	2,154 Climbing	FlightAware ADS-B (ADL / YPAD)
Mon 02:54:15 AM	-35.0816	138.4448	↘ 142°	274.0	315.0	5200.0	1,688 Climbing	FlightAware ADS-B (ADL / YPAD)
Mon 02:54:33 AM	-35.0978	138.4618	↘ 134°	281.0	323.0	5700.0	2,042 Climbing	FlightAware ADS-B (ADL / YPAD)
Mon 02:54:51 AM	-35.1101	138.4889	→ 109°	285.0	328.0	6425.0	1,939 Climbing	FlightAware ADS-B (ADL / YPAD)
Mon 02:55:14 AM	-35.1152	138.5235	→ 99°	288.0	331.0	7025.0	2,038 Climbing	FlightAware ADS-B (ADL / YPAD)
Mon 02:55:44 AM	-35.1219	138.575	→ 99°	296.0	341.0	8225.0	2,342 Climbing	FlightAware ADS-B (ADL / YPAD)
Mon 02:56:11 AM	-35.1275	138.6181	→ 99°	300.0	345.0	9250.0	1,864 Climbing	FlightAware ADS-B (ADL / YPAD)
Mon 02:56:54 AM	-35.1372	138.6916	→ 99°	322.0	371.0	10400.0	1,600 Climbing	Aus ATC (ADS-B)
Mon 02:56:56 AM	-35.138	138.6973	→ 99°	327.0	376.0	10450.0	1,200 Climbing	FlightAware ADS-B (PAL / YPPF)
Mon 02:56:59 AM	-35.1385	138.7007	→ 99°	328.0	377.0	10500.0	692 Climbing	Aus ATC (ADS-B)
Mon 02:57:09 AM	-35.141	138.7195	→ 99°	338.0	389.0	10600.0	960 Climbing	Aus ATC (ADS-B)
Mon 02:57:24 AM	-35.1449	138.7486	→ 100°	353.0	406.0	10900.0	1,147 Climbing	Aus ATC (ADS-B)
Mon 02:57:26 AM	-35.1457	138.7542	→ 99°	355.0	409.0	10925.0	1,200 Climbing	FlightAware ADS-B (PAL / YPPF)
Mon 02:57:34 AM	-35.1476	138.7687	→ 99°	361.0	415.0	11100.0	1,600 Climbing	Aus ATC (ADS-B)
Mon 02:57:56 AM	-35.154	138.8157	→ 99°	369.0	425.0	11725.0	2,057 Climbing	FlightAware ADS-B (PAL / YPPF)
Mon 02:58:09 AM	-35.1572	138.8405	→ 99°	370.0	426.0	12300.0	2,583 Climbing	Aus ATC (ADS-B)
Mon 02:58:14 AM	-35.1585	138.8508	→ 99°	372.0	428.0	12500.0	2,000 Climbing	Aus ATC (ADS-B)
Mon 02:58:24 AM	-35.1613	138.8716	→ 100°	374.0	430.0	12800.0	1,500 Climbing	Aus ATC (ADS-B)
Mon 02:58:26 AM	-35.1622	138.8781	→ 99°	374.0	430.0	12800.0	2,400 Climbing	FlightAware ADS-B (PAL / YPPF)
Mon 02:58:29 AM	-35.1627	138.8821	→ 98°	376.0	433.0	13000.0	2,308 Climbing	Aus ATC (ADS-B)
Mon 02:58:39 AM	-35.1654	138.9031	→ 99°	378.0	435.0	13300.0	2,160 Climbing	Aus ATC (ADS-B)
Mon 02:58:54 AM	-35.1696	138.9348	→ 99°	381.0	438.0	13900.0	2,206 Climbing	Aus ATC (ADS-B)
Mon 02:58:56 AM	-35.1705	138.9415	→ 99°	381.0	438.0	13925.0	2,203 Climbing	FlightAware ADS-B (PAL / YPPF)
Mon 02:59:26 AM	-35.179	139.0063	→ 99°	387.0	445.0	15075.0	2,250 Climbing	FlightAware ADS-B (PAL / YPPF)
Mon 02:59:56 AM	-35.1874	139.0719	→ 99°	391.0	450.0	16175.0	2,405 Climbing	FlightAware ADS-B (PAL / YPPF)
Mon 03:00:24 AM	-35.1949	139.1301	→ 99°	395.0	455.0	17400.0	2,550 Climbing	Aus ATC (ADS-B)
Mon 03:00:26 AM	-35.1954	139.1339	→ 99°	395.0	455.0	17450.0	2,203 Climbing	FlightAware ADS-B (ADL / YPAD)
Mon 03:00:56 AM	-35.2044	139.2031	→ 99°	403.0	464.0	18575.0	2,100 Climbing	FlightAware ADS-B (YPED)
Mon 03:01:26 AM	-35.213	139.2708	→ 99°	412.0	474.0	19550.0	1,922 Climbing	FlightAware ADS-B (PAL / YPPF)
Mon 03:01:28 AM	-35.2137	139.2765	→ 99°	414.0	476.0	19600.0	1,833 Climbing	Aus ATC (ADS-B)
Mon 03:01:44 AM	-35.2182	139.3114	→ 99°	419.0	482.0	20100.0	2,160 Climbing	Aus ATC (ADS-B)
Mon 03:01:53 AM	-35.2212	139.335	→ 99°	422.0	486.0	20500.0	2,000 Climbing	Aus ATC (ADS-B)
Mon 03:01:56 AM	-35.222	139.3413	→ 99°	422.0	486.0	20500.0	2,000 Climbing	FlightAware ADS-B (PAL / YPPF)
Mon 03:01:59 AM	-35.2227	139.3468	→ 99°	423.0	487.0	20700.0	2,500 Climbing	Aus ATC (ADS-B)
Mon 03:02:08 AM	-35.2258	139.3705	→ 99°	427.0	491.0	21000.0	1,714 Climbing	Aus ATC (ADS-B)
Mon 03:02:13 AM	-35.2273	139.3824	→ 98°	429.0	494.0	21100.0	1,917 Climbing	Aus ATC (ADS-B)
Mon 03:02:26 AM	-35.2312	139.4132	→ 99°	433.0	498.0	21575.0	1,943 Climbing	FlightAware ADS-B (PLO / YPLC)
Mon 03:02:57 AM	-35.2417	139.4877	→ 103°	445.0	512.0	22525.0	1,734 Climbing	FlightAware ADS-B (MQL / YMIA)
Mon 03:02:58 AM	-35.2421	139.4919	→ 97°	443.0	510.0	22500.0	2,022 Climbing	Aus ATC (ADS-B)
Mon 03:03:20 AM	-35.257	139.5461	↘ 111°	454.0	522.0	23300.0	2,100 Climbing	FlightAware ADS-B (YKTH)
Mon 03:03:38 AM	-35.2721	139.5873	↘ 114°	457.0	526.0	23900.0	2,087 Climbing	Aus ATC (ADS-B)
Mon 03:03:43 AM	-35.2765	139.599	↘ 114°	457.0	526.0	24100.0	2,400 Climbing	Aus ATC (ADS-B)
Mon 03:03:48 AM	-35.2808	139.6108	↘ 114°	459.0	528.0	24300.0	2,143 Climbing	Aus ATC (ADS-B)
Mon 03:03:50 AM	-35.2826	139.6158	↘ 114°	459.0	528.0	24350.0	1,800 Climbing	FlightAware ADS-B (PAL / YPPF)
Mon 03:03:58 AM	-35.2896	139.6345	↘ 115°	461.0	531.0	24600.0	2,050 Climbing	Aus ATC (ADS-B)
Mon 03:04:20 AM	-35.309	139.6864	↘ 115°	466.0	536.0	25375.0	2,000 Climbing	FlightAware ADS-B (YADG)
Mon 03:04:43 AM	-35.3298	139.7424	↘ 114°	471.0	542.0	26100.0	2,000 Climbing	Aus ATC (ADS-B)
Mon 03:04:50 AM	-35.3365	139.7604	↘ 114°	473.0	544.0	26375.0	1,905 Climbing	FlightAware ADS-B (YADG)
Mon 03:05:20 AM	-35.3648	139.837	↘ 114°	483.0	556.0	27275.0	1,618 Climbing	FlightAware ADS-B (YKTH)
Mon 03:05:28 AM	-35.3708	139.8534	↘ 114°	484.0	557.0	27400.0	1,500 Climbing	Aus ATC (ADS-B)
Mon 03:05:33 AM	-35.3755	139.8659	↘ 114°	486.0	559.0	27600.0	2,000 Climbing	Aus ATC (ADS-B)
Mon 03:05:46 AM	-35.3879	139.8997	↘ 114°	489.0	563.0	28000.0	1,833 Climbing	Aus ATC (ADS-B)
Mon 03:05:51 AM	-35.3919	139.9104	↘ 114°	490.0	564.0	28150.0	2,000 Climbing	FlightAware ADS-B (PAL / YPPF)
Mon 03:05:58 AM	-35.3987	139.929	↘ 114°	491.0	565.0	28400.0	1,850 Climbing	Aus ATC (ADS-B)
Mon 03:06:21 AM	-35.4196	139.9859	↘ 114°	494.0	568.0	29075.0	1,800 Climbing	FlightAware ADS-B (YADG)
Mon 03:06:38 AM	-35.4362	140.0308	↘ 114°	495.0	570.0	29600.0	1,929 Climbing	Aus ATC (ADS-B)
Mon 03:06:42 AM	-35.4404	140.0422	↘ 114°	497.0	572.0	29750.0	2,250 Climbing	FlightAware ADS-B (PRM / LPPM)
Mon 03:06:46 AM	-35.4441	140.0524	↘ 114°	497.0	572.0	29900.0	1,667 Climbing	Aus ATC (ADS-B)
Mon 03:06:51 AM	-35.4488	140.0652	↘ 114°	498.0	573.0	30000.0	1,600 Climbing	Aus ATC (ADS-B)
Mon 03:07:01 AM	-35.4583	140.0909	↘ 114°	500.0	575.0	30300.0	2,000 Climbing	Aus ATC (ADS-B)
Mon 03:07:03 AM	-35.4598	140.0951	↘ 114°	500.0	575.0	30400.0	1,636 Climbing	Aus ATC (ADS-B)
Mon 03:07:12 AM	-35.4688	140.1195	↘ 114°	502.0	578.0	30600.0	1,200 Climbing	FlightAware ADS-B (YKTH)
Mon 03:07:18 AM	-35.4741	140.1339	↘ 115°	503.0	579.0	30700.0	1,500 Climbing	Aus ATC (ADS-B)
Mon 03:07:28 AM	-35.4837	140.1599	↘ 114°	505.0	581.0	31000.0	1,846 Climbing	Aus ATC (ADS-B)
Mon 03:07:31 AM	-35.4869	140.1688	↘ 114°	506.0	582.0	31100.0	1,600 Climbing	Aus ATC (ADS-B)
Mon 03:07:43 AM	-35.498	140.1992	↘ 114°	508.0	585.0	31400.0	1,200 Climbing	Aus ATC (ADS-B)
Mon 03:07:46 AM	-35.5013	140.2081	↘ 114°	508.0	585.0	31400.0	1,385 Climbing	Aus ATC (ADS-B)
Mon 03:07:56 AM	-35.511	140.2347	↘ 114°	512.0	589.0	31700.0	1,600 Climbing	Aus ATC (ADS-B)
Mon 03:08:01 AM	-35.5158	140.2478	↘ 115°	513.0	590.0	31800.0	1,000 Climbing	Aus ATC (ADS-B)
Mon 03:08:08 AM	-35.5222	140.2654	↘ 114°	515.0	593.0	31900.0	1,250 Climbing	Aus ATC (ADS-B)
Mon 03:08:13 AM	-35.5265	140.2772	↘ 114°	516.0	594.0	32049.999999999996	1,500 Climbing	FlightAware ADS-B (YKTH)
Mon 03:08:16 AM	-35.5304	140.2878	↘ 114°	516.0	594.0	32100.0	1,125 Climbing	Aus ATC (ADS-B)
Mon 03:08:21 AM	-35.5352	140.3012	↘ 114°	517.0	595.0	32200.000000000004	1,200 Climbing	Aus ATC (ADS-B)
Mon 03:08:31 AM	-35.545	140.3278	↘ 114°	517.0	595.0	32400.0	1,500 Climbing	Aus ATC (ADS-B)
Mon 03:08:33 AM	-35.5465	140.3322	↘ 114°	520.0	598.0	32500.0	1,625 Climbing	Aus ATC (ADS-B)
Mon 03:08:43 AM	-35.5569	140.3607	↘ 114°	522.0	601.0	32725.0	1,200 Climbing	FlightAware ADS-B (YXAD)
Mon 03:08:48 AM	-35.5612	140.3727	↘ 114°	523.0	602.0	32800.0	1,100 Climbing	Aus ATC (ADS-B)
Mon 03:08:58 AM	-35.5711	140.3999	↘ 114°	525.0	604.0	33000.0	1,385 Climbing	Aus ATC (ADS-B)
Mon 03:09:01 AM	-35.5744	140.4091	↘ 114°	525.0	604.0	33100.0	1,500 Climbing	Aus ATC (ADS-B)
Mon 03:09:13 AM	-35.5858	140.4404	↘ 114°	527.0	606.0	33375.0	2,108 Climbing	FlightAware ADS-B (YKTH)
Mon 03:09:38 AM	-35.6104	140.5086	↘ 114°	519.0	597.0	34400.0	2,350 Climbing	Aus ATC (ADS-B)
Mon 03:09:43 AM	-35.6151	140.5215	↘ 114°	518.0	596.0	34550.0	1,500 Climbing	FlightAware ADS-B (YKTH)
Mon 03:09:46 AM	-35.6186	140.5311	↘ 115°	518.0	596.0	34600.0	2,100 Climbing	Aus ATC (ADS-B)
Mon 03:09:53 AM	-35.625	140.5488	↘ 114°	517.0	595.0	34900.0	2,000 Climbing	Aus ATC (ADS-B)
Mon 03:10:01 AM	-35.6332	140.5714	↘ 114°	517.0	595.0	35100.0	1,200 Climbing	Aus ATC (ADS-B)
Mon 03:10:03 AM	-35.6347	140.5756	↘ 112°	517.0	595.0	35100.0	1,500 Climbing	Aus ATC (ADS-B)
Mon 03:10:14 AM	-35.6458	140.6062	↘ 114°	518.0	596.0	35425.0	1,600 Climbing	FlightAware ADS-B (YXAD)
Mon 03:10:18 AM	-35.6493	140.6158	↘ 114°	517.0	595.0	35500.0	1,676 Climbing	Aus ATC (ADS-B)
Mon 03:10:31 AM	-35.6622	140.6518	↘ 114°	515.0	593.0	35900.0	2,000 Climbing	Aus ATC (ADS-B)
Mon 03:10:33 AM	-35.6637	140.6561	↘ 115°	515.0	593.0	36000.0	2,000 Climbing	Aus ATC (ADS-B)
Mon 03:10:43 AM	-35.6733	140.6827	↘ 114°	514.0	592.0	36300.0	1,636 Climbing	Aus ATC (ADS-B)
Mon 03:10:44 AM	-35.6749	140.687	↘ 114°	514.0	592.0	36300.0	1,500 Climbing	FlightAware ADS-B (YXAD)
Mon 03:10:47 AM	-35.6781	140.6961	↘ 114°	514.0	592.0	36400.0	1,800 Climbing	Aus ATC (ADS-B)
Mon 03:11:14 AM	-35.7034	140.7663	↘ 114°	510.0	587.0	37200.0	1,474 Climbing	FlightAware ADS-B (YKTH)
Mon 03:11:45 AM	-35.7323	140.847	↘ 114°	510.0	587.0	37825.0	1,406 Climbing	FlightAware ADS-B (YXAD)
Mon 03:12:18 AM	-35.7644	140.9365	↘ 114°	503.0	579.0	38700.0	1,500 Climbing	FlightAware ADS-B (MQL / YMIA)
Mon 03:12:32 AM	-35.7775	140.9732	↘ 113°	503.0	579.0	39000.0	947 Climbing	Aus ATC (ADS-B)
Mon 03:12:37 AM	-35.7821	140.9863	↘ 113°	504.0	580.0	39000.0	Level	Aus ATC (ADS-B)
Mon 03:12:47 AM	-35.7914	141.0125	↘ 113°	503.0	579.0	39000.0	125 Climbing	Aus ATC (ADS-B)
Mon 03:12:49 AM	-35.793	141.017	↘ 114°	503.0	579.0	39025.0	Level	FlightAware ADS-B (MQL / YMIA)
Mon 03:13:02 AM	-35.8054	141.0516	↘ 114°	502.0	578.0	39000.0	-54 Descending	Aus ATC (ADS-B)
Mon 03:13:17 AM	-35.8193	141.0908	↘ 114°	502.0	578.0	39000.0	Level	Aus ATC (ADS-B)
Mon 03:13:19 AM	-35.8212	141.0962	↘ 114°	502.0	578.0	39000.0	Level	FlightAware ADS-B (MQL / YMIA)
Mon 03:13:27 AM	-35.8286	141.1169	↘ 113°	503.0	579.0	39000.0	Level	Aus ATC (ADS-B)
Mon 03:13:32 AM	-35.8332	141.1301	↘ 114°	503.0	579.0	39000.0	Level	Aus ATC (ADS-B)
Mon 03:13:42 AM	-35.8425	141.1562	↘ 114°	503.0	579.0	39000.0	Level	Aus ATC (ADS-B)
Mon 03:13:49 AM	-35.849	141.1748	↘ 113°	503.0	579.0	39000.0	Level	FlightAware ADS-B (MQL / YMIA)
Mon 03:14:20 AM	-35.8779	141.2565	↘ 113°	503.0	579.0	39000.0	Level	FlightAware ADS-B (ARY / YARA)
Mon 03:14:47 AM	-35.9028	141.327	↘ 113°	505.0	581.0	39000.0	Level	Aus ATC (ADS-B)
Mon 03:14:50 AM	-35.9051	141.3336	↘ 114°	505.0	581.0	39000.0	Level	FlightAware ADS-B (MQL / YMIA)
Mon 03:14:57 AM	-35.9121	141.3533	↘ 114°	506.0	582.0	39000.0	Level	Aus ATC (ADS-B)
Mon 03:15:02 AM	-35.9167	141.3665	↘ 113°	506.0	582.0	39000.0	Level	Aus ATC (ADS-B)
Mon 03:15:12 AM	-35.926	141.3928	↘ 114°	506.0	582.0	39000.0	Level	Aus ATC (ADS-B)
Mon 03:15:17 AM	-35.9306	141.4061	↘ 114°	506.0	582.0	39000.0	Level	Aus ATC (ADS-B)
Mon 03:15:20 AM	-35.9338	141.4149	↘ 113°	506.0	582.0	39000.0	Level	FlightAware ADS-B (ARY / YARA)
Mon 03:15:22 AM	-35.9353	141.4193	↘ 113°	506.0	582.0	39000.0	Level	Aus ATC (ADS-B)
Mon 03:15:32 AM	-35.9446	141.4458	↘ 113°	506.0	582.0	39000.0	Level	Aus ATC (ADS-B)
Mon 03:15:37 AM	-35.9492	141.459	↘ 114°	506.0	582.0	39000.0	Level	Aus ATC (ADS-B)
Mon 03:15:52 AM	-35.9632	141.4986	↘ 114°	507.0	583.0	39000.0	Level	Aus ATC (ADS-B)
Mon 03:16:05 AM	-35.9755	141.5337	↘ 114°	507.0	583.0	39000.0	Level	Aus ATC (ADS-B)
Mon 03:16:08 AM	-35.9787	141.5429	↘ 113°	507.0	583.0	39000.0	Level	FlightAware ADS-B (MQL / YMIA)
Mon 03:16:38 AM	-36.006	141.6213	↘ 113°	508.0	585.0	39000.0	Level	FlightAware ADS-B (YBRS)
Mon 03:16:57 AM	-36.0232	141.6705	↘ 113°	509.0	586.0	39000.0	Level	Aus ATC (ADS-B)
Mon 03:17:07 AM	-36.0326	141.6972	↘ 114°	509.0	586.0	39000.0	Level	Aus ATC (ADS-B)
Mon 03:17:08 AM	-36.0333	141.6992	↘ 113°	510.0	587.0	39000.0	Level	FlightAware ADS-B (MQL / YMIA)
Mon 03:17:12 AM	-36.0372	141.7105	↘ 113°	510.0	587.0	39000.0	Level	Aus ATC (ADS-B)
Mon 03:17:22 AM	-36.0466	141.7372	↘ 114°	510.0	587.0	39000.0	Level	Aus ATC (ADS-B)
Mon 03:17:27 AM	-36.0512	141.7505	↘ 113°	511.0	588.0	39000.0	Level	Aus ATC (ADS-B)
Mon 03:17:35 AM	-36.0593	141.7739	↘ 114°	511.0	588.0	39000.0	Level	Aus ATC (ADS-B)
Mon 03:17:38 AM	-36.0624	141.783	↘ 113°	512.0	589.0	39000.0	Level	FlightAware ADS-B (HLT / YHML)
Mon 03:17:42 AM	-36.0651	141.7907	↘ 114°	512.0	589.0	39000.0	Level	Aus ATC (ADS-B)
Mon 03:17:47 AM	-36.0698	141.8042	↘ 114°	512.0	589.0	39000.0	Level	Aus ATC (ADS-B)
Mon 03:17:57 AM	-36.079	141.831	↘ 113°	512.0	589.0	39000.0	Level	Aus ATC (ADS-B)
Mon 03:18:08 AM	-36.0889	141.8595	↘ 113°	513.0	590.0	39000.0	Level	FlightAware ADS-B (MQL / YMIA)
Mon 03:18:12 AM	-36.0929	141.8713	↘ 112°	513.0	590.0	39000.0	Level	Aus ATC (ADS-B)
Mon 03:18:27 AM	-36.1069	141.9116	↘ 113°	513.0	590.0	39000.0	Level	Aus ATC (ADS-B)
Mon 03:18:37 AM	-36.1162	141.9386	↘ 114°	514.0	592.0	39000.0	Level	Aus ATC (ADS-B)
Mon 03:18:38 AM	-36.1189	141.9463	↘ 113°	514.0	592.0	39000.0	Level	FlightAware ADS-B (YKTH)
Mon 03:18:42 AM	-36.1209	141.952	↘ 112°	514.0	592.0	39000.0	Level	Aus ATC (ADS-B)
Mon 03:19:08 AM	-36.1464	142.0261	↘ 113°	516.0	594.0	39000.0	Level	FlightAware ADS-B (YKTH)
Mon 03:19:17 AM	-36.1535	142.0467	↘ 113°	516.0	594.0	39000.0	Level	Aus ATC (ADS-B)
Mon 03:19:27 AM	-36.1629	142.0738	↘ 113°	516.0	594.0	39000.0	Level	Aus ATC (ADS-B)
Mon 03:19:38 AM	-36.1735	142.1048	↘ 113°	517.0	595.0	39000.0	Level	FlightAware ADS-B (MBW / YMMB)
Mon 03:20:11 AM	-36.2049	142.1963	↘ 113°	521.0	600.0	39000.0	Level	Aus ATC (ADS-B)
Mon 03:20:21 AM	-36.2142	142.2237	↘ 113°	521.0	600.0	39000.0	Level	Aus ATC (ADS-B)
Mon 03:20:26 AM	-36.2189	142.2374	↘ 114°	521.0	600.0	39000.0	Level	Aus ATC (ADS-B)
Mon 03:20:41 AM	-36.2329	142.2781	↘ 113°	522.0	601.0	39000.0	267 Climbing	FlightAware ADS-B (MBW / YMMB)
Mon 03:21:11 AM	-36.2613	142.3614	↘ 113°	526.0	605.0	39200.0	514 Climbing	FlightAware ADS-B (MBW / YMMB)
Mon 03:21:16 AM	-36.266	142.3752	↘ 112°	527.0	606.0	39300.0	800 Climbing	Aus ATC (ADS-B)
Mon 03:21:26 AM	-36.2754	142.403	↘ 113°	526.0	605.0	39400.0	1,200 Climbing	Aus ATC (ADS-B)
Mon 03:21:41 AM	-36.2894	142.4444	↘ 113°	523.0	602.0	39800.0	1,500 Climbing	Aus ATC (ADS-B)
Mon 03:21:43 AM	-36.2903	142.4471	↘ 113°	523.0	602.0	39825.0	1,200 Climbing	FlightAware ADS-B (YTDN)
Mon 03:21:51 AM	-36.2987	142.4719	↘ 113°	521.0	600.0	40000.0	1,731 Climbing	Aus ATC (ADS-B)
Mon 03:21:56 AM	-36.3033	142.4857	↘ 113°	520.0	598.0	40200.0	1,600 Climbing	Aus ATC (ADS-B)
Mon 03:22:06 AM	-36.3126	142.5129	↘ 113°	517.0	595.0	40400.0	1,200 Climbing	Aus ATC (ADS-B)
Mon 03:22:11 AM	-36.3172	142.5265	↘ 113°	515.0	593.0	40500.0	1,500 Climbing	Aus ATC (ADS-B)
Mon 03:22:14 AM	-36.3207	142.5366	↘ 113°	514.0	592.0	40600.0	1,200 Climbing	FlightAware ADS-B (HLT / YHML)
Mon 03:22:21 AM	-36.3264	142.5536	↘ 113°	513.0	590.0	40700.0	1,000 Climbing	Aus ATC (ADS-B)
Mon 03:22:26 AM	-36.331	142.567	↘ 114°	513.0	590.0	40800.0	1,200 Climbing	Aus ATC (ADS-B)
Mon 03:22:31 AM	-36.3356	142.5805	↘ 113°	512.0	589.0	40900.0	600 Climbing	Aus ATC (ADS-B)
Mon 03:22:46 AM	-36.3493	142.6209	↘ 113°	511.0	588.0	41000.0	240 Climbing	Aus ATC (ADS-B)
Mon 03:22:56 AM	-36.3584	142.6479	↘ 113°	509.0	586.0	41000.0	Level	Aus ATC (ADS-B)
Mon 03:23:11 AM	-36.372	142.6882	↘ 113°	510.0	587.0	41000.0	Level	Aus ATC (ADS-B)
Mon 03:23:14 AM	-36.3735	142.6928	↘ 113°	510.0	587.0	41000.0	Level	FlightAware ADS-B (YTDN)
Mon 03:23:21 AM	-36.3811	142.7151	↘ 113°	510.0	587.0	41000.0	Level	Aus ATC (ADS-B)
Mon 03:23:26 AM	-36.3856	142.7286	↘ 112°	510.0	587.0	41000.0	Level	Aus ATC (ADS-B)
Mon 03:23:36 AM	-36.3947	142.7555	↘ 113°	510.0	587.0	41000.0	Level	Aus ATC (ADS-B)
Mon 03:23:41 AM	-36.3992	142.769	↘ 112°	510.0	587.0	41000.0	Level	Aus ATC (ADS-B)
Mon 03:23:44 AM	-36.4025	142.7786	↘ 113°	510.0	587.0	41000.0	Level	FlightAware ADS-B (MQL / YMIA)
Mon 03:23:46 AM	-36.4038	142.7825	↘ 115°	510.0	587.0	41000.0	Level	Aus ATC (ADS-B)
Mon 03:23:56 AM	-36.4128	142.8094	↘ 112°	510.0	587.0	41000.0	Level	Aus ATC (ADS-B)
Mon 03:24:01 AM	-36.4174	142.8229	↘ 112°	510.0	587.0	41000.0	Level	Aus ATC (ADS-B)
Mon 03:24:11 AM	-36.4264	142.8499	↘ 113°	511.0	588.0	41000.0	Level	Aus ATC (ADS-B)
Mon 03:24:16 AM	-36.4309	142.8633	↘ 113°	511.0	588.0	41000.0	Level	Aus ATC (ADS-B)
Mon 03:24:44 AM	-36.4575	142.9426	↘ 112°	512.0	589.0	41000.0	Level	FlightAware ADS-B (HLT / YHML)
Mon 03:25:06 AM	-36.4761	142.9987	↘ 113°	513.0	590.0	41000.0	Level	Aus ATC (ADS-B)
Mon 03:25:11 AM	-36.4806	143.0123	↘ 113°	514.0	592.0	41000.0	Level	Aus ATC (ADS-B)
Mon 03:25:15 AM	-36.4843	143.0233	↘ 112°	514.0	592.0	41000.0	Level	FlightAware ADS-B (MGB / YMTG)
Mon 03:25:21 AM	-36.4896	143.0395	↘ 112°	514.0	592.0	41000.0	Level	Aus ATC (ADS-B)
Mon 03:25:27 AM	-36.4942	143.0531	↘ 112°	514.0	592.0	41000.0	Level	Aus ATC (ADS-B)
Mon 03:25:31 AM	-36.4987	143.0666	↘ 112°	514.0	592.0	41000.0	Level	Aus ATC (ADS-B)
Mon 03:25:41 AM	-36.5078	143.094	↘ 113°	515.0	593.0	41000.0	Level	Aus ATC (ADS-B)
Mon 03:25:46 AM	-36.5123	143.1076	↘ 112°	515.0	593.0	41000.0	Level	Aus ATC (ADS-B)
Mon 03:25:56 AM	-36.5214	143.1349	↘ 113°	516.0	594.0	41000.0	Level	Aus ATC (ADS-B)
Mon 03:26:11 AM	-36.535	143.176	↘ 112°	516.0	594.0	41000.0	Level	Aus ATC (ADS-B)
Mon 03:26:15 AM	-36.5388	143.1875	↘ 112°	517.0	595.0	41000.0	Level	FlightAware ADS-B (MGB / YMTG)
Mon 03:26:26 AM	-36.5485	143.2171	↘ 113°	517.0	595.0	41000.0	Level	Aus ATC (ADS-B)
Mon 03:26:36 AM	-36.5576	143.2446	↘ 112°	517.0	595.0	41000.0	Level	Aus ATC (ADS-B)
Mon 03:26:41 AM	-36.5621	143.2583	↘ 113°	519.0	597.0	41000.0	Level	Aus ATC (ADS-B)
Mon 03:26:45 AM	-36.566	143.2703	↘ 112°	519.0	597.0	41000.0	Level	FlightAware ADS-B (MGB / YMTG)
Mon 03:27:16 AM	-36.5939	143.3548	↘ 112°	519.0	597.0	41000.0	Level	Aus ATC (ADS-B)
Mon 03:27:18 AM	-36.5962	143.3616	↘ 112°	519.0	597.0	41000.0	Level	FlightAware ADS-B (YCLC)
Mon 03:27:49 AM	-36.6242	143.4469	↘ 112°	520.0	598.0	41000.0	Level	FlightAware ADS-B (MEL / YMML)
Mon 03:27:56 AM	-36.6303	143.4653	↘ 113°	521.0	600.0	41000.0	Level	Aus ATC (ADS-B)
Mon 03:28:06 AM	-36.6394	143.493	↘ 112°	521.0	600.0	41000.0	Level	Aus ATC (ADS-B)
Mon 03:28:11 AM	-36.6439	143.5069	↘ 112°	522.0	601.0	41000.0	Level	Aus ATC (ADS-B)
Mon 03:28:21 AM	-36.6529	143.5347	↘ 112°	522.0	601.0	41000.0	Level	Aus ATC (ADS-B)
Mon 03:28:26 AM	-36.6575	143.5486	↘ 113°	523.0	602.0	41000.0	Level	Aus ATC (ADS-B)
Mon 03:28:31 AM	-36.6621	143.5625	↘ 113°	523.0	602.0	41000.0	Level	Aus ATC (ADS-B)
Mon 03:28:41 AM	-36.6711	143.5904	↘ 112°	523.0	602.0	41000.0	Level	Aus ATC (ADS-B)
Mon 03:28:46 AM	-36.6757	143.6042	↘ 112°	523.0	602.0	41000.0	Level	Aus ATC (ADS-B)
Mon 03:28:49 AM	-36.679	143.6145	↘ 112°	524.0	603.0	41000.0	Level	FlightAware ADS-B (YTDN)
Mon 03:29:01 AM	-36.6893	143.646	↘ 112°	524.0	603.0	41000.0	Level	Aus ATC (ADS-B)
Mon 03:29:10 AM	-36.6985	143.6739	↘ 112°	524.0	603.0	41000.0	Level	Aus ATC (ADS-B)
Mon 03:29:19 AM	-36.7064	143.6984	↘ 112°	524.0	603.0	41000.0	Level	FlightAware ADS-B (YSBE)
Mon 03:29:26 AM	-36.7121	143.7158	↘ 112°	525.0	604.0	41000.0	Level	Aus ATC (ADS-B)
Mon 03:29:36 AM	-36.7211	143.7439	↘ 112°	526.0	605.0	41000.0	Level	Aus ATC (ADS-B)
Mon 03:29:41 AM	-36.7257	143.7579	↘ 112°	526.0	605.0	41000.0	Level	Aus ATC (ADS-B)
Mon 03:29:51 AM	-36.7348	143.7859	↘ 112°	526.0	605.0	41000.0	Level	Aus ATC (ADS-B)
Mon 03:29:56 AM	-36.7393	143.8	↘ 112°	526.0	605.0	41000.0	Level	Aus ATC (ADS-B)
Mon 03:30:05 AM	-36.7484	143.828	↘ 112°	527.0	606.0	41000.0	Level	Aus ATC (ADS-B)
Mon 03:30:16 AM	-36.7575	143.8561	↘ 112°	527.0	606.0	41000.0	Level	Aus ATC (ADS-B)
Mon 03:30:19 AM	-36.7611	143.8671	↘ 112°	528.0	608.0	41000.0	Level	FlightAware ADS-B (MBW / YMMB)
Mon 03:30:30 AM	-36.7711	143.8983	↘ 112°	528.0	608.0	41000.0	Level	Aus ATC (ADS-B)
Mon 03:30:45 AM	-36.7848	143.9407	↘ 112°	529.0	609.0	41000.0	Level	Aus ATC (ADS-B)
Mon 03:30:49 AM	-36.7886	143.9524	↘ 112°	529.0	609.0	41000.0	Level	FlightAware ADS-B (YCLC)
Mon 03:30:56 AM	-36.7939	143.9689	↘ 112°	529.0	609.0	41000.0	Level	Aus ATC (ADS-B)
Mon 03:31:00 AM	-36.7985	143.983	↘ 112°	529.0	609.0	41000.0	Level	Aus ATC (ADS-B)
Mon 03:31:10 AM	-36.8076	144.0111	↘ 112°	529.0	609.0	41000.0	Level	Aus ATC (ADS-B)
Mon 03:31:15 AM	-36.8121	144.0253	↘ 111°	529.0	609.0	41000.0	Level	Aus ATC (ADS-B)
Mon 03:31:19 AM	-36.816	144.0375	↘ 112°	529.0	609.0	41000.0	Level	FlightAware ADS-B (YCLC)
Mon 03:31:30 AM	-36.8258	144.0677	↘ 112°	530.0	610.0	41000.0	Level	Aus ATC (ADS-B)
Mon 03:31:35 AM	-36.8303	144.0818	↘ 112°	530.0	610.0	41000.0	Level	Aus ATC (ADS-B)
Mon 03:31:49 AM	-36.8421	144.1185	↘ 112°	531.0	611.0	41000.0	Level	FlightAware ADS-B (YMPC)
Mon 03:32:15 AM	-36.8666	144.1952	↘ 112°	531.0	611.0	41000.0	Level	Aus ATC (ADS-B)
Mon 03:32:20 AM	-36.8708	144.2083	↘ 112°	532.0	612.0	41000.0	Level	FlightAware ADS-B (YMPC)
Mon 03:32:25 AM	-36.8757	144.2236	↘ 111°	532.0	612.0	41000.0	Level	Aus ATC (ADS-B)
Mon 03:32:30 AM	-36.8802	144.2379	↘ 112°	532.0	612.0	41000.0	Level	Aus ATC (ADS-B)
Mon 03:32:40 AM	-36.8893	144.2663	↘ 112°	532.0	612.0	41000.0	Level	Aus ATC (ADS-B)
Mon 03:32:45 AM	-36.8939	144.2805	↘ 112°	532.0	612.0	41000.0	Level	Aus ATC (ADS-B)
Mon 03:32:50 AM	-36.898	144.2934	↘ 112°	532.0	612.0	41000.0	Level	FlightAware ADS-B (MBW / YMMB)
Mon 03:32:55 AM	-36.9029	144.309	↘ 111°	532.0	612.0	41000.0	Level	Aus ATC (ADS-B)
Mon 03:33:00 AM	-36.9074	144.3233	↘ 112°	533.0	613.0	41000.0	Level	Aus ATC (ADS-B)
Mon 03:33:10 AM	-36.9162	144.352	↘ 111°	533.0	613.0	41000.0	Level	Aus ATC (ADS-B)
Mon 03:33:15 AM	-36.9204	144.3665	→ 110°	533.0	613.0	41000.0	Level	Aus ATC (ADS-B)
Mon 03:33:20 AM	-36.9245	144.3808	→ 109°	533.0	613.0	41000.0	Level	Aus ATC (ADS-B)
Mon 03:33:35 AM	-36.9365	144.4245	→ 108°	533.0	613.0	41000.0	Level	FlightAware ADS-B (YSBE)
Mon 03:33:56 AM	-36.9528	144.4888	→ 107°	534.0	615.0	41000.0	Level	FlightAware ADS-B (MBW / YMMB)
Mon 03:34:00 AM	-36.955	144.4977	→ 108°	534.0	615.0	41000.0	Level	Aus ATC (ADS-B)
Mon 03:34:15 AM	-36.966	144.542	→ 107°	535.0	616.0	41000.0	Level	FlightAware ADS-B (YSBE)
Mon 03:34:40 AM	-36.9841	144.6156	→ 107°	536.0	617.0	41000.0	Level	Aus ATC (ADS-B)
Mon 03:34:45 AM	-36.9877	144.6304	→ 107°	536.0	617.0	41000.0	Level	Aus ATC (ADS-B)
Mon 03:34:47 AM	-36.9892	144.6367	→ 107°	536.0	617.0	41000.0	Level	FlightAware ADS-B (MEL / YMML)
Mon 03:34:50 AM	-36.9913	144.6453	→ 108°	537.0	618.0	41000.0	Level	Aus ATC (ADS-B)
Mon 03:35:17 AM	-37.0111	144.7264	→ 107°	538.0	619.0	41000.0	Level	FlightAware ADS-B (MEL / YMML)
Mon 03:35:45 AM	-37.0311	144.8085	→ 107°	539.0	620.0	41000.0	Level	Aus ATC (ADS-B)
Mon 03:35:47 AM	-37.0308	144.8073	→ 107°	539.0	620.0	41000.0	Level	FlightAware ADS-B
Mon 03:35:55 AM	-37.0383	144.8382	→ 107°	540.0	621.0	41000.0	Level	Aus ATC (ADS-B)
Mon 03:36:00 AM	-37.0419	144.8531	→ 107°	540.0	621.0	41000.0	Level	Aus ATC (ADS-B)
Mon 03:36:22 AM	-37.0577	144.9181	→ 107°	541.0	623.0	41000.0	Level	FlightAware ADS-B
Mon 03:36:45 AM	-37.0745	144.9876	→ 107°	542.0	624.0	41000.0	Level	Aus ATC (ADS-B)
Mon 03:36:50 AM	-37.0781	145.0026	→ 107°	542.0	624.0	41000.0	Level	Aus ATC (ADS-B)
Mon 03:36:52 AM	-37.0796	145.0089	→ 107°	543.0	625.0	41000.0	Level	FlightAware ADS-B
Mon 03:37:00 AM	-37.0853	145.0326	→ 107°	543.0	625.0	41000.0	Level	Aus ATC (ADS-B)
Mon 03:37:15 AM	-37.0961	145.0777	→ 107°	543.0	625.0	41000.0	Level	Aus ATC (ADS-B)
Mon 03:37:23 AM	-37.1016	145.1005	→ 107°	544.0	626.0	41000.0	Level	FlightAware ADS-B (YAFD)
Mon 03:37:30 AM	-37.107	145.1228	→ 106°	544.0	626.0	41000.0	Level	Aus ATC (ADS-B)
Mon 03:37:43 AM	-37.1166	145.1631	→ 107°	545.0	627.0	41000.0	Level	Aus ATC (ADS-B)
Mon 03:37:45 AM	-37.1178	145.1679	→ 107°	545.0	627.0	41000.0	Level	Aus ATC (ADS-B)
Mon 03:37:55 AM	-37.1251	145.198	→ 107°	546.0	628.0	41000.0	Level	Aus ATC (ADS-B)
Mon 03:38:00 AM	-37.1287	145.2132	→ 106°	546.0	628.0	41000.0	Level	Aus ATC (ADS-B)
Mon 03:38:23 AM	-37.1457	145.284	→ 107°	549.0	632.0	41000.0	Level	FlightAware ADS-B (MBW / YMMB)
Mon 03:38:48 AM	-37.1638	145.36	→ 107°	550.0	633.0	41000.0	Level	Aus ATC (ADS-B)
Mon 03:38:53 AM	-37.167	145.3734	→ 106°	549.0	632.0	41000.0	Level	FlightAware ADS-B (ABX / YMAY)
Mon 03:39:00 AM	-37.1722	145.3953	→ 106°	550.0	633.0	41000.0	Level	Aus ATC (ADS-B)
Mon 03:39:13 AM	-37.1818	145.4361	→ 106°	549.0	632.0	41000.0	Level	Aus ATC (ADS-B)
Mon 03:39:15 AM	-37.183	145.4409	→ 107°	549.0	632.0	41000.0	Level	Aus ATC (ADS-B)
Mon 03:39:23 AM	-37.1892	145.4671	→ 106°	549.0	632.0	41000.0	Level	FlightAware ADS-B (ABX / YMAY)
Mon 03:39:25 AM	-37.1902	145.4714	→ 106°	550.0	633.0	41000.0	Level	Aus ATC (ADS-B)
Mon 03:39:30 AM	-37.1938	145.4866	→ 106°	550.0	633.0	41000.0	Level	Aus ATC (ADS-B)
Mon 03:39:38 AM	-37.1999	145.5122	→ 107°	549.0	632.0	41000.0	Level	Aus ATC (ADS-B)
Mon 03:39:45 AM	-37.2046	145.5323	→ 106°	549.0	632.0	41000.0	Level	Aus ATC (ADS-B)
Mon 03:39:50 AM	-37.2081	145.5475	→ 106°	549.0	632.0	41000.0	Level	Aus ATC (ADS-B)
Mon 03:39:53 AM	-37.2101	145.5555	→ 106°	549.0	632.0	41000.0	Level	FlightAware ADS-B (YBRS)
Mon 03:40:00 AM	-37.2154	145.578	→ 107°	549.0	632.0	41000.0	Level	Aus ATC (ADS-B)
Mon 03:40:05 AM	-37.2189	145.5932	→ 106°	549.0	632.0	41000.0	Level	Aus ATC (ADS-B)
Mon 03:40:14 AM	-37.2261	145.6237	→ 106°	549.0	632.0	41000.0	Level	Aus ATC (ADS-B)
Mon 03:40:23 AM	-37.2324	145.6505	→ 106°	549.0	632.0	41000.0	Level	FlightAware ADS-B (MBW / YMMB)
Mon 03:40:54 AM	-37.2547	145.7456	→ 106°	550.0	633.0	41000.0	Level	Aus ATC (ADS-B)
Mon 03:40:59 AM	-37.2583	145.7609	→ 107°	550.0	633.0	41000.0	Level	Aus ATC (ADS-B)
Mon 03:41:24 AM	-37.2764	145.8385	→ 106°	550.0	633.0	41000.0	Level	FlightAware ADS-B (MEL / YMML)
Mon 03:41:34 AM	-37.2832	145.8677	→ 106°	550.0	633.0	41000.0	Level	Aus ATC (ADS-B)
Mon 03:41:48 AM	-37.2927	145.9087	→ 106°	550.0	633.0	41000.0	Level	Aus ATC (ADS-B)
Mon 03:41:50 AM	-37.2939	145.9135	→ 108°	550.0	633.0	41000.0	Level	Aus ATC (ADS-B)
Mon 03:41:54 AM	-37.2969	145.9266	→ 106°	549.0	632.0	41000.0	Level	FlightAware ADS-B (ABX / YMAY)
Mon 03:41:59 AM	-37.301	145.9441	→ 107°	550.0	633.0	41000.0	Level	Aus ATC (ADS-B)
Mon 03:42:04 AM	-37.3045	145.9594	→ 106°	550.0	633.0	41000.0	Level	Aus ATC (ADS-B)
Mon 03:42:14 AM	-37.3116	145.99	→ 106°	550.0	633.0	41000.0	Level	Aus ATC (ADS-B)
Mon 03:42:16 AM	-37.3126	145.994	→ 106°	550.0	633.0	41000.0	Level	FlightAware ADS-B (YMFD)
Mon 03:42:19 AM	-37.3151	146.0052	→ 107°	550.0	633.0	41000.0	Level	Aus ATC (ADS-B)
Mon 03:42:24 AM	-37.3187	146.0205	→ 106°	550.0	633.0	41000.0	Level	Aus ATC (ADS-B)
Mon 03:42:34 AM	-37.3258	146.0511	→ 107°	551.0	634.0	41000.0	Level	Aus ATC (ADS-B)
Mon 03:42:39 AM	-37.3293	146.0665	→ 106°	551.0	634.0	41000.0	Level	Aus ATC (ADS-B)
Mon 03:42:46 AM	-37.3342	146.088	→ 106°	551.0	634.0	41000.0	Level	FlightAware ADS-B (YMFD)
Mon 03:42:49 AM	-37.3364	146.0971	→ 107°	551.0	634.0	41000.0	Level	Aus ATC (ADS-B)
Mon 03:42:52 AM	-37.3388	146.1074	→ 106°	550.0	633.0	41000.0	Level	Aus ATC (ADS-B)
Mon 03:43:04 AM	-37.3469	146.1431	→ 106°	551.0	634.0	41000.0	Level	Aus ATC (ADS-B)
Mon 03:43:19 AM	-37.3575	146.1891	→ 106°	551.0	634.0	41000.0	Level	Aus ATC (ADS-B)
Mon 03:43:29 AM	-37.3645	146.2198	→ 106°	551.0	634.0	41000.0	Level	Aus ATC (ADS-B)
Mon 03:43:34 AM	-37.368	146.2352	→ 106°	551.0	634.0	41000.0	Level	Aus ATC (ADS-B)
Mon 03:43:44 AM	-37.3751	146.2659	→ 106°	551.0	634.0	41000.0	Level	Aus ATC (ADS-B)
Mon 03:43:49 AM	-37.3786	146.2812	→ 106°	551.0	634.0	41000.0	Level	Aus ATC (ADS-B)
Mon 03:43:57 AM	-37.3845	146.307	→ 106°	551.0	634.0	41000.0	Level	Aus ATC (ADS-B)
Mon 03:44:04 AM	-37.3891	146.3272	→ 106°	551.0	634.0	41000.0	Level	Aus ATC (ADS-B)
Mon 03:44:09 AM	-37.3926	146.3426	→ 106°	550.0	633.0	41000.0	Level	Aus ATC (ADS-B)
Mon 03:44:19 AM	-37.3996	146.3732	→ 106°	549.0	632.0	41000.0	Level	Aus ATC (ADS-B)
Mon 03:44:22 AM	-37.402	146.3835	→ 105°	549.0	632.0	41000.0	Level	Aus ATC (ADS-B)
Mon 03:44:34 AM	-37.4101	146.4191	→ 106°	549.0	632.0	41000.0	Level	Aus ATC (ADS-B)
Mon 03:44:49 AM	-37.4205	146.465	→ 106°	550.0	633.0	41000.0	Level	Aus ATC (ADS-B)
Mon 03:44:50 AM	-37.421	146.4674	→ 106°	550.0	633.0	41000.0	Level	FlightAware ADS-B (MEL / YMML)
Mon 03:45:02 AM	-37.4297	146.5058	→ 106°	550.0	633.0	41000.0	Level	Aus ATC (ADS-B)
Mon 03:45:04 AM	-37.4309	146.5111	→ 107°	550.0	633.0	41000.0	Level	Aus ATC (ADS-B)
Mon 03:45:14 AM	-37.4378	146.5417	→ 106°	550.0	633.0	41000.0	Level	Aus ATC (ADS-B)
Mon 03:45:20 AM	-37.4417	146.5589	→ 106°	549.0	632.0	41000.0	Level	FlightAware ADS-B (MEL / YMML)
Mon 03:45:49 AM	-37.4621	146.6489	→ 106°	550.0	633.0	41000.0	Level	Aus ATC (ADS-B)
Mon 03:45:54 AM	-37.4655	146.6642	→ 106°	550.0	633.0	41000.0	Level	Aus ATC (ADS-B)
Mon 03:45:55 AM	-37.4663	146.6676	→ 106°	549.0	632.0	41000.0	Level	FlightAware ADS-B (ABX / YMAY)
Mon 03:46:25 AM	-37.4866	146.7581	→ 106°	548.0	631.0	41000.0	Level	FlightAware ADS-B (ABX / YMAY)
Mon 03:46:34 AM	-37.4931	146.7868	→ 106°	550.0	633.0	41000.0	Level	Aus ATC (ADS-B)
Mon 03:46:37 AM	-37.4954	146.7973	→ 106°	549.0	632.0	41000.0	Level	Aus ATC (ADS-B)
Mon 03:46:49 AM	-37.5034	146.8329	→ 106°	548.0	631.0	41000.0	Level	Aus ATC (ADS-B)
Mon 03:46:52 AM	-37.5057	146.8433	→ 106°	548.0	631.0	41000.0	Level	Aus ATC (ADS-B)
Mon 03:46:55 AM	-37.5078	146.8529	→ 106°	548.0	631.0	41000.0	Level	FlightAware ADS-B (ABX / YMAY)
Mon 03:47:02 AM	-37.5125	146.8739	→ 106°	548.0	631.0	41000.0	Level	Aus ATC (ADS-B)
Mon 03:47:14 AM	-37.5204	146.9095	→ 106°	548.0	631.0	41000.0	Level	Aus ATC (ADS-B)
Mon 03:47:25 AM	-37.5281	146.9443	→ 105°	547.0	629.0	41000.0	Level	FlightAware ADS-B (ABX / YMAY)
Mon 03:47:55 AM	-37.5486	147.0371	→ 106°	547.0	629.0	41000.0	Level	FlightAware ADS-B (ABX / YMAY)
Mon 03:48:04 AM	-37.5542	147.0626	→ 105°	547.0	629.0	41000.0	Level	Aus ATC (ADS-B)
Mon 03:48:07 AM	-37.5565	147.073	→ 106°	548.0	631.0	41000.0	Level	Aus ATC (ADS-B)
Mon 03:48:22 AM	-37.5667	147.119	→ 106°	548.0	631.0	41000.0	Level	Aus ATC (ADS-B)
Mon 03:48:25 AM	-37.5685	147.1271	→ 106°	548.0	631.0	41000.0	Level	FlightAware ADS-B (YTDN)
Mon 03:48:29 AM	-37.5711	147.1392	→ 105°	549.0	632.0	41000.0	Level	Aus ATC (ADS-B)
Mon 03:48:37 AM	-37.5768	147.165	→ 106°	549.0	632.0	41000.0	Level	Aus ATC (ADS-B)
Mon 03:48:44 AM	-37.5813	147.1853	→ 106°	549.0	632.0	41000.0	Level	Aus ATC (ADS-B)
Mon 03:48:52 AM	-37.5869	147.2111	→ 105°	549.0	632.0	41000.0	Level	Aus ATC (ADS-B)
Mon 03:48:54 AM	-37.5881	147.2161	→ 106°	549.0	632.0	41000.0	Level	Aus ATC (ADS-B)
Mon 03:48:55 AM	-37.5893	147.2216	→ 105°	549.0	632.0	41000.0	Level	FlightAware ADS-B (YTDN)
Mon 03:49:07 AM	-37.5971	147.2572	→ 106°	549.0	632.0	41000.0	Level	Aus ATC (ADS-B)
Mon 03:49:09 AM	-37.5982	147.2621	→ 105°	549.0	632.0	41000.0	Level	Aus ATC (ADS-B)
Mon 03:49:22 AM	-37.6072	147.3032	→ 105°	548.0	631.0	41000.0	Level	Aus ATC (ADS-B)
Mon 03:49:26 AM	-37.6099	147.3154	→ 105°	549.0	632.0	41000.0	Level	FlightAware ADS-B (YTDN)
Mon 03:49:34 AM	-37.615	147.3389	→ 105°	548.0	631.0	41000.0	Level	Aus ATC (ADS-B)
Mon 03:49:37 AM	-37.6173	147.3494	→ 106°	548.0	631.0	41000.0	Level	Aus ATC (ADS-B)
Mon 03:49:47 AM	-37.624	147.3801	→ 105°	548.0	631.0	41000.0	Level	Aus ATC (ADS-B)
Mon 03:49:52 AM	-37.6274	147.3955	→ 105°	548.0	631.0	41000.0	Level	Aus ATC (ADS-B)
Mon 03:49:56 AM	-37.6301	147.4079	→ 105°	550.0	633.0	41000.0	Level	FlightAware ADS-B (YTDN)
Mon 03:50:26 AM	-37.6504	147.5011	→ 105°	550.0	633.0	41000.0	Level	FlightAware ADS-B (BWT / YWYY)
Mon 03:50:56 AM	-37.6705	147.5944	→ 105°	551.0	634.0	41000.0	Level	FlightAware ADS-B (ABX / YMAY)
Mon 03:51:07 AM	-37.6775	147.627	→ 105°	551.0	634.0	41000.0	Level	Aus ATC (ADS-B)
Mon 03:51:08 AM	-37.6786	147.632	→ 105°	551.0	634.0	41000.0	Level	Aus ATC (ADS-B)
Mon 03:51:18 AM	-37.6852	147.6629	→ 105°	552.0	635.0	41000.0	Level	Aus ATC (ADS-B)
Mon 03:51:23 AM	-37.6886	147.6784	→ 105°	552.0	635.0	41000.0	Level	Aus ATC (ADS-B)
Mon 03:51:26 AM	-37.6902	147.6864	→ 105°	552.0	635.0	41000.0	Level	FlightAware ADS-B (YTDN)
Mon 03:51:56 AM	-37.7103	147.7794	→ 105°	553.0	636.0	41000.0	Level	FlightAware ADS-B (YTDN)
Mon 03:52:08 AM	-37.7185	147.8181	→ 105°	553.0	636.0	41000.0	Level	Aus ATC (ADS-B)
Mon 03:52:26 AM	-37.7302	147.873	→ 105°	553.0	636.0	41000.0	Level	FlightAware ADS-B (YTDN)
Mon 03:52:48 AM	-37.7449	147.9425	→ 105°	553.0	636.0	41000.0	Level	Aus ATC (ADS-B)
Mon 03:52:53 AM	-37.7483	147.958	→ 105°	553.0	636.0	41000.0	Level	Aus ATC (ADS-B)
Mon 03:52:56 AM	-37.7502	147.9673	→ 105°	554.0	638.0	41000.0	Level	FlightAware ADS-B (YTDN)
Mon 03:53:02 AM	-37.7538	147.9841	→ 105°	554.0	638.0	41000.0	Level	Aus ATC (ADS-B)
Mon 03:53:26 AM	-37.7702	148.0613	→ 105°	554.0	638.0	41000.0	Level	FlightAware ADS-B (YTDN)
Mon 03:53:41 AM	-37.7802	148.1088	→ 105°	555.0	639.0	41000.0	Level	Aus ATC (ADS-B)
Mon 03:53:56 AM	-37.7873	148.1425	→ 105°	554.0	638.0	41000.0	Level	FlightAware ADS-B (ABX / YMAY)
Mon 03:54:18 AM	-37.8042	148.2231	→ 105°	555.0	639.0	41000.0	Level	Aus ATC (ADS-B)
Mon 03:54:23 AM	-37.8075	148.2388	→ 105°	554.0	638.0	41000.0	Level	Aus ATC (ADS-B)
Mon 03:54:27 AM	-37.8101	148.251	→ 105°	555.0	639.0	41000.0	Level	FlightAware ADS-B (ABX / YMAY)
Mon 03:54:33 AM	-37.8141	148.27	→ 105°	555.0	639.0	41000.0	Level	Aus ATC (ADS-B)
Mon 03:54:38 AM	-37.8173	148.2857	→ 105°	555.0	639.0	41000.0	Level	Aus ATC (ADS-B)
Mon 03:54:46 AM	-37.8228	148.3119	→ 105°	555.0	639.0	41000.0	Level	Aus ATC (ADS-B)
Mon 03:54:53 AM	-37.8272	148.3325	→ 105°	555.0	639.0	41000.0	Level	Aus ATC (ADS-B)
Mon 03:54:58 AM	-37.8304	148.3482	→ 105°	555.0	639.0	41000.0	Level	Aus ATC (ADS-B)
Mon 03:55:27 AM	-37.8495	148.4401	→ 105°	555.0	639.0	41000.0	Level	FlightAware ADS-B (ABX / YMAY)
Mon 03:55:38 AM	-37.8564	148.4735	→ 105°	555.0	639.0	41000.0	Level	Aus ATC (ADS-B)
Mon 03:55:41 AM	-37.8586	148.484	→ 104°	555.0	639.0	41000.0	Level	Aus ATC (ADS-B)
Mon 03:55:51 AM	-37.8652	148.5155	→ 105°	556.0	640.0	41000.0	Level	Aus ATC (ADS-B)
Mon 03:55:56 AM	-37.8684	148.5311	→ 105°	556.0	640.0	41000.0	Level	Aus ATC (ADS-B)
Mon 03:55:57 AM	-37.8686	148.5322	→ 105°	556.0	640.0	41000.0	Level	FlightAware ADS-B (YTDN)
Mon 03:56:03 AM	-37.8727	148.5519	→ 105°	556.0	640.0	41000.0	Level	Aus ATC (ADS-B)
Mon 03:56:11 AM	-37.8781	148.5782	→ 105°	556.0	640.0	41000.0	Level	Aus ATC (ADS-B)
Mon 03:56:16 AM	-37.8813	148.5938	→ 104°	556.0	640.0	41000.0	Level	Aus ATC (ADS-B)
Mon 03:56:26 AM	-37.8878	148.6251	→ 105°	556.0	640.0	41000.0	Level	Aus ATC (ADS-B)
Mon 03:56:28 AM	-37.8888	148.6303	→ 104°	556.0	640.0	41000.0	Level	Aus ATC (ADS-B)
Mon 03:56:43 AM	-37.8985	148.6774	→ 105°	556.0	640.0	41000.0	Level	Aus ATC (ADS-B)
Mon 03:56:58 AM	-37.9082	148.7245	→ 104°	556.0	640.0	41000.0	Level	Aus ATC (ADS-B)
Mon 03:57:28 AM	-37.9274	148.8186	→ 104°	556.0	640.0	41000.0	Level	Aus ATC (ADS-B)
Mon 03:57:29 AM	-37.9285	148.824	→ 105°	556.0	640.0	41000.0	Level	FlightAware ADS-B (YDPO)
Mon 03:57:33 AM	-37.9306	148.8343	→ 104°	555.0	639.0	41000.0	Level	Aus ATC (ADS-B)
Mon 03:57:43 AM	-37.937	148.8657	→ 104°	555.0	639.0	41000.0	Level	Aus ATC (ADS-B)
Mon 03:57:48 AM	-37.9402	148.8814	→ 105°	555.0	639.0	41000.0	Level	Aus ATC (ADS-B)
Mon 03:57:59 AM	-37.9475	148.9172	→ 104°	556.0	640.0	41000.0	Level	FlightAware ADS-B (BSJ / YBNS)
Mon 03:58:13 AM	-37.9561	148.96	→ 104°	556.0	640.0	41000.0	Level	Aus ATC (ADS-B)
Mon 03:58:28 AM	-37.9656	149.0072	→ 104°	555.0	639.0	41000.0	Level	Aus ATC (ADS-B)
Mon 03:58:29 AM	-37.9666	149.0115	→ 104°	555.0	639.0	41000.0	Level	FlightAware ADS-B (BSJ / YBNS)
Mon 03:58:38 AM	-37.972	149.0386	→ 105°	555.0	639.0	41000.0	Level	Aus ATC (ADS-B)
Mon 03:58:59 AM	-37.9855	149.105	→ 104°	555.0	639.0	41000.0	Level	FlightAware ADS-B (GUL / YGLB)
Mon 03:59:13 AM	-37.9942	149.1485	→ 104°	555.0	639.0	41000.0	Level	Aus ATC (ADS-B)
Mon 03:59:17 AM	-37.9974	149.1642	→ 104°	555.0	639.0	41000.0	Level	Aus ATC (ADS-B)
Mon 03:59:27 AM	-38.0037	149.1955	→ 104°	555.0	639.0	41000.0	Level	Aus ATC (ADS-B)
Mon 03:59:29 AM	-38.0048	149.2014	→ 104°	555.0	639.0	41000.0	Level	FlightAware ADS-B (YTDN)
Mon 03:59:32 AM	-38.0068	149.2113	→ 104°	555.0	639.0	41000.0	Level	Aus ATC (ADS-B)
Mon 03:59:42 AM	-38.0131	149.2427	→ 104°	555.0	639.0	41000.0	Level	Aus ATC (ADS-B)
Mon 03:59:59 AM	-38.0234	149.2946	→ 104°	556.0	640.0	41000.0	Level	FlightAware ADS-B (BSJ / YBNS)
Mon 04:00:29 AM	-38.0425	149.3907	→ 104°	556.0	640.0	41000.0	Level	FlightAware ADS-B (YTDN)
Mon 04:00:59 AM	-38.0605	149.4814	→ 104°	557.0	641.0	41000.0	Level	FlightAware ADS-B (YTDN)
Mon 04:01:02 AM	-38.0632	149.4949	→ 104°	557.0	641.0	41000.0	Level	Aus ATC (ADS-B)
Mon 04:01:17 AM	-38.0725	149.5422	→ 104°	556.0	640.0	41000.0	Level	Aus ATC (ADS-B)
Mon 04:01:27 AM	-38.0787	149.5737	→ 104°	556.0	640.0	41000.0	Level	Aus ATC (ADS-B)
Mon 04:01:30 AM	-38.0799	149.5796	→ 104°	556.0	640.0	41000.0	Level	FlightAware ADS-B (YTDN)
Mon 04:01:42 AM	-38.088	149.621	→ 104°	556.0	640.0	41000.0	Level	Aus ATC (ADS-B)
Mon 04:01:47 AM	-38.0911	149.6369	→ 104°	556.0	640.0	41000.0	Level	Aus ATC (ADS-B)
Mon 04:01:52 AM	-38.0942	149.6527	→ 104°	556.0	640.0	41000.0	Level	Aus ATC (ADS-B)
Mon 04:02:00 AM	-38.0989	149.6768	→ 104°	556.0	640.0	41000.0	Level	FlightAware ADS-B (BSJ / YBNS)
Mon 04:02:02 AM	-38.1003	149.6842	→ 104°	556.0	640.0	41000.0	Level	Aus ATC (ADS-B)
Mon 04:02:07 AM	-38.1034	149.7001	→ 104°	556.0	640.0	41000.0	Level	Aus ATC (ADS-B)
Mon 04:02:17 AM	-38.1096	149.7317	→ 104°	557.0	641.0	41000.0	Level	Aus ATC (ADS-B)
Mon 04:02:31 AM	-38.1183	149.7758	→ 104°	557.0	641.0	41000.0	Level	FlightAware ADS-B (YMIG)
Mon 04:02:32 AM	-38.1189	149.7791	→ 104°	557.0	641.0	41000.0	Level	Aus ATC (ADS-B)
Mon 04:02:47 AM	-38.1281	149.8266	→ 104°	557.0	641.0	41000.0	Level	Aus ATC (ADS-B)
Mon 04:03:08 AM	-38.1408	149.8923	→ 104°	557.0	641.0	41000.0	Level	FlightAware ADS-B (SXE / YMES)
Mon 04:03:32 AM	-38.1557	149.9692	→ 104°	557.0	641.0	41000.0	Level	Aus ATC (ADS-B)
Mon 04:03:37 AM	-38.1588	149.9851	→ 104°	557.0	641.0	41000.0	Level	Aus ATC (ADS-B)
Mon 04:03:38 AM	-38.1594	149.9883	→ 104°	558.0	642.0	41000.0	Level	FlightAware ADS-B (SXE / YMES)
Mon 04:03:47 AM	-38.1649	150.0167	→ 104°	558.0	642.0	41000.0	Level	Aus ATC (ADS-B)
Mon 04:03:52 AM	-38.168	150.0325	→ 104°	557.0	641.0	41000.0	Level	Aus ATC (ADS-B)
Mon 04:04:02 AM	-38.1741	150.0642	→ 104°	557.0	641.0	41000.0	Level	Aus ATC (ADS-B)
Mon 04:04:08 AM	-38.1776	150.0826	→ 104°	557.0	641.0	41000.0	Level	FlightAware ADS-B (SXE / YMES)
Mon 04:04:17 AM	-38.1832	150.1118	→ 104°	557.0	641.0	41000.0	Level	Aus ATC (ADS-B)
Mon 04:04:27 AM	-38.1893	150.1435	→ 104°	557.0	641.0	41000.0	Level	Aus ATC (ADS-B)
Mon 04:04:32 AM	-38.1923	150.1593	→ 103°	557.0	641.0	41000.0	Level	Aus ATC (ADS-B)
Mon 04:04:42 AM	-38.1984	150.191	→ 104°	556.0	640.0	41000.0	Level	Aus ATC (ADS-B)
Mon 04:04:47 AM	-38.2014	150.2068	→ 104°	556.0	640.0	41000.0	Level	Aus ATC (ADS-B)
Mon 04:04:57 AM	-38.2074	150.2385	→ 104°	555.0	639.0	41000.0	Level	Aus ATC (ADS-B)
Mon 04:05:09 AM	-38.2138	150.2747	→ 102°	554.0	638.0	41000.0	Level	FlightAware ADS-B (CBR / YSCB)
Mon 04:05:47 AM	-38.2297	150.3983	→ 97°	550.0	633.0	41000.0	Level	FlightAware ADS-B (YGDO)
Mon 04:06:02 AM	-38.2337	150.4457	→ 96°	550.0	633.0	41000.0	Level	Aus ATC (ADS-B)
Mon 04:06:18 AM	-38.2379	150.4962	→ 96°	549.0	632.0	41000.0	Level	FlightAware ADS-B (YGDO)
Mon 04:06:27 AM	-38.2403	150.5257	→ 96°	549.0	632.0	41000.0	Level	Aus ATC (ADS-B)
Mon 04:06:32 AM	-38.2416	150.5417	→ 96°	549.0	632.0	41000.0	Level	Aus ATC (ADS-B)
Mon 04:06:42 AM	-38.2442	150.5737	→ 96°	549.0	632.0	41000.0	Level	Aus ATC (ADS-B)
Mon 04:06:48 AM	-38.2458	150.5936	→ 96°	550.0	633.0	41000.0	Level	FlightAware ADS-B (YGDO)
Mon 04:06:52 AM	-38.2468	150.6058	→ 96°	550.0	633.0	41000.0	Level	Aus ATC (ADS-B)
Mon 04:07:02 AM	-38.2493	150.6379	→ 96°	550.0	633.0	41000.0	Level	Aus ATC (ADS-B)
Mon 04:07:07 AM	-38.2506	150.6539	→ 96°	550.0	633.0	41000.0	Level	Aus ATC (ADS-B)
Mon 04:07:21 AM	-38.2543	150.701	→ 96°	550.0	633.0	41000.0	Level	Aus ATC (ADS-B)
Mon 04:07:23 AM	-38.2547	150.7055	→ 96°	550.0	633.0	41000.0	Level	FlightAware ADS-B (SXE / YMES)
Mon 04:07:31 AM	-38.2568	150.733	→ 96°	550.0	633.0	41000.0	Level	Aus ATC (ADS-B)
Mon 04:07:46 AM	-38.2606	150.7812	→ 96°	550.0	633.0	41000.0	Level	Aus ATC (ADS-B)
Mon 04:07:56 AM	-38.2631	150.8132	→ 96°	550.0	633.0	41000.0	Level	Aus ATC (ADS-B)
Mon 04:08:01 AM	-38.2644	150.8293	→ 96°	550.0	633.0	41000.0	Level	Aus ATC (ADS-B)
Mon 04:08:11 AM	-38.2669	150.8614	→ 96°	551.0	634.0	41000.0	Level	Aus ATC (ADS-B)
Mon 04:08:26 AM	-38.2707	150.9096	→ 96°	551.0	634.0	41000.0	Level	Aus ATC (ADS-B)
Mon 04:08:36 AM	-38.2731	150.9416	→ 96°	551.0	634.0	41000.0	Level	Aus ATC (ADS-B)
Mon 04:08:51 AM	-38.2769	150.9898	→ 96°	551.0	634.0	41000.0	Level	Aus ATC (ADS-B)
Mon 04:09:01 AM	-38.2794	151.0219	→ 96°	550.0	633.0	41000.0	Level	Aus ATC (ADS-B)
Mon 04:09:06 AM	-38.2806	151.038	→ 95°	550.0	633.0	41000.0	Level	Aus ATC (ADS-B)
Mon 04:09:16 AM	-38.2831	151.07	→ 96°	550.0	633.0	41000.0	Level	Aus ATC (ADS-B)
Mon 04:09:21 AM	-38.2843	151.0861	→ 95°	550.0	633.0	41000.0	Level	Aus ATC (ADS-B)
Mon 04:09:31 AM	-38.2868	151.1181	→ 96°	550.0	633.0	41000.0	Level	Aus ATC (ADS-B)
Mon 04:09:36 AM	-38.2879	151.1341	→ 95°	548.0	631.0	41000.0	Level	Aus ATC (ADS-B)
Mon 04:09:41 AM	-38.2892	151.1501	→ 96°	548.0	631.0	41000.0	Level	Aus ATC (ADS-B)
Mon 04:10:21 AM	-38.2988	151.278	→ 95°	547.0	629.0	41000.0	Level	Aus ATC (ADS-B)
Mon 04:10:36 AM	-38.3023	151.326	→ 95°	547.0	629.0	41000.0	Level	Aus ATC (ADS-B)
Mon 04:10:41 AM	-38.3035	151.342	→ 96°	547.0	629.0	41000.0	Level	Aus ATC (ADS-B)
Mon 04:10:51 AM	-38.3059	151.374	→ 95°	547.0	629.0	41000.0	Level	Aus ATC (ADS-B)
Mon 04:10:56 AM	-38.3071	151.3899	→ 95°	546.0	628.0	41000.0	Level	Aus ATC (ADS-B)
Mon 04:11:06 AM	-38.3094	151.4218	→ 95°	546.0	628.0	41000.0	Level	Aus ATC (ADS-B)
Mon 04:11:11 AM	-38.3106	151.4378	→ 95°	546.0	628.0	41000.0	Level	Aus ATC (ADS-B)
Mon 04:11:26 AM	-38.3141	151.4856	→ 95°	546.0	628.0	41000.0	Level	Aus ATC (ADS-B)
Mon 04:11:31 AM	-38.3152	151.5016	→ 95°	546.0	628.0	41000.0	Level	Aus ATC (ADS-B)
Mon 04:11:41 AM	-38.3175	151.5334	→ 95°	546.0	628.0	41000.0	Level	Aus ATC (ADS-B)
Mon 04:11:46 AM	-38.3186	151.5493	→ 95°	546.0	628.0	41000.0	Level	Aus ATC (ADS-B)
Mon 04:11:56 AM	-38.321	151.5813	→ 95°	546.0	628.0	41000.0	Level	Aus ATC (ADS-B)
Mon 04:12:11 AM	-38.3244	151.629	→ 95°	545.0	627.0	41000.0	Level	Aus ATC (ADS-B)
Mon 04:12:21 AM	-38.3267	151.6609	→ 95°	545.0	627.0	41000.0	Level	Aus ATC (ADS-B)
Mon 04:12:26 AM	-38.3278	151.6768	→ 95°	545.0	627.0	41000.0	Level	Aus ATC (ADS-B)
Mon 04:12:55 AM	-38.3345	151.7721	→ 95°	544.0	626.0	41000.0	Level	FlightAware ADS-B (YXWL)
Mon 04:13:11 AM	-38.3379	151.82	→ 95°	544.0	626.0	41000.0	Level	Aus ATC (ADS-B)
Mon 04:13:16 AM	-38.3389	151.8359	→ 95°	544.0	626.0	41000.0	Level	Aus ATC (ADS-B)
Mon 04:13:26 AM	-38.3412	151.8677	→ 95°	544.0	626.0	41000.0	Level	Aus ATC (ADS-B)
Mon 04:13:31 AM	-38.3422	151.8836	→ 95°	544.0	626.0	41000.0	Level	Aus ATC (ADS-B)
Mon 04:13:41 AM	-38.3444	151.9153	→ 95°	543.0	625.0	41000.0	Level	Aus ATC (ADS-B)
Mon 04:13:56 AM	-38.3477	151.963	→ 95°	543.0	625.0	41000.0	Level	Aus ATC (ADS-B)
Mon 04:14:06 AM	-38.3499	151.9947	→ 95°	543.0	625.0	41000.0	Level	Aus ATC (ADS-B)
Mon 04:14:11 AM	-38.351	152.0104	→ 95°	543.0	625.0	41000.0	Level	Aus ATC (ADS-B)
Mon 04:14:21 AM	-38.3531	152.0423	→ 95°	542.0	624.0	41000.0	Level	Aus ATC (ADS-B)
Mon 04:14:26 AM	-38.3542	152.0582	→ 95°	542.0	624.0	41000.0	Level	Aus ATC (ADS-B)
Mon 04:14:36 AM	-38.3563	152.0899	→ 95°	542.0	624.0	41000.0	Level	Aus ATC (ADS-B)
Mon 04:14:41 AM	-38.3573	152.1057	→ 95°	542.0	624.0	41000.0	Level	Aus ATC (ADS-B)
Mon 04:14:46 AM	-38.3584	152.1216	→ 95°	542.0	624.0	41000.0	Level	Aus ATC (ADS-B)
Mon 04:14:56 AM	-38.3605	152.1533	→ 95°	542.0	624.0	41000.0	Level	Aus ATC (ADS-B)
Mon 04:15:01 AM	-38.3616	152.1691	→ 95°	542.0	624.0	41000.0	Level	Aus ATC (ADS-B)
Mon 04:15:16 AM	-38.3648	152.2167	→ 95°	542.0	624.0	41000.0	Level	Aus ATC (ADS-B)
Mon 04:16:01 AM	-38.3741	152.359	→ 95°	541.0	623.0	41000.0	Level	Aus ATC (ADS-B)
Mon 04:16:06 AM	-38.3752	152.3748	→ 95°	541.0	623.0	41000.0	Level	Aus ATC (ADS-B)
Mon 04:16:21 AM	-38.3782	152.4222	→ 95°	540.0	621.0	41000.0	Level	Aus ATC (ADS-B)
Mon 04:16:31 AM	-38.3803	152.4538	→ 95°	540.0	621.0	41000.0	Level	Aus ATC (ADS-B)
Mon 04:16:50 AM	-38.3843	152.5171	→ 95°	540.0	621.0	41000.0	Level	Aus ATC (ADS-B)
Mon 04:17:05 AM	-38.3873	152.5643	→ 95°	539.0	620.0	41000.0	Level	Aus ATC (ADS-B)
Mon 04:17:15 AM	-38.3893	152.5959	→ 95°	539.0	620.0	41000.0	Level	Aus ATC (ADS-B)
Mon 04:17:20 AM	-38.3903	152.6116	→ 95°	538.0	619.0	41000.0	Level	Aus ATC (ADS-B)
Mon 04:17:30 AM	-38.3923	152.6431	→ 95°	538.0	619.0	41000.0	Level	Aus ATC (ADS-B)
Mon 04:17:35 AM	-38.3933	152.6588	→ 95°	538.0	619.0	41000.0	Level	Aus ATC (ADS-B)
Mon 04:17:40 AM	-38.3943	152.6746	→ 94°	538.0	619.0	41000.0	Level	Aus ATC (ADS-B)
Mon 04:17:50 AM	-38.3962	152.706	→ 94°	537.0	618.0	41000.0	Level	Aus ATC (ADS-B)
Mon 04:17:55 AM	-38.3972	152.7217	→ 95°	537.0	618.0	41000.0	Level	Aus ATC (ADS-B)
Mon 04:18:05 AM	-38.3991	152.7531	→ 95°	537.0	618.0	41000.0	Level	Aus ATC (ADS-B)
Mon 04:18:10 AM	-38.4001	152.7688	→ 95°	537.0	618.0	41000.0	Level	Aus ATC (ADS-B)
Mon 04:18:20 AM	-38.402	152.8003	→ 95°	537.0	618.0	41000.0	Level	Aus ATC (ADS-B)
Mon 04:18:35 AM	-38.4049	152.8473	→ 95°	537.0	618.0	41000.0	Level	Aus ATC (ADS-B)
Mon 04:18:45 AM	-38.4068	152.8785	→ 94°	535.0	616.0	41000.0	Level	Aus ATC (ADS-B)
Mon 04:18:50 AM	-38.4078	152.8944	→ 95°	535.0	616.0	41000.0	Level	Aus ATC (ADS-B)
Mon 04:19:00 AM	-38.4097	152.9256	→ 94°	535.0	616.0	41000.0	Level	Aus ATC (ADS-B)
Mon 04:19:05 AM	-38.4106	152.941	→ 94°	535.0	616.0	41000.0	Level	Aus ATC (ADS-B)
Mon 04:19:15 AM	-38.4125	152.9728	→ 94°	535.0	616.0	41000.0	Level	Aus ATC (ADS-B)
Mon 04:19:20 AM	-38.4134	152.9881	→ 95°	535.0	616.0	41000.0	Level	Aus ATC (ADS-B)
Mon 04:19:25 AM	-38.4144	153.0035	→ 95°	535.0	616.0	41000.0	Level	Aus ATC (ADS-B)
Mon 04:27:44 AM	-38.4973	154.5742	→ 92°	530.0	610.0	41000.0	Level	Aus ATC (ADS-B)
Mon 04:27:59 AM	-38.4994	154.6208	→ 93°	529.0	609.0	41000.0	Level	Aus ATC (ADS-B)
Mon 04:28:09 AM	-38.5008	154.6519	→ 93°	529.0	609.0	41000.0	Level	Aus ATC (ADS-B)
Mon 04:28:14 AM	-38.5015	154.6674	→ 93°	529.0	609.0	41000.0	Level	Aus ATC (ADS-B)
Mon 04:28:24 AM	-38.5028	154.6985	→ 93°	529.0	609.0	41000.0	Level	Aus ATC (ADS-B)
Mon 04:28:29 AM	-38.5035	154.714	→ 93°	529.0	609.0	41000.0	Level	Aus ATC (ADS-B)
Mon 04:28:39 AM	-38.5048	154.7448	→ 93°	529.0	609.0	41000.0	Level	Aus ATC (ADS-B)
Mon 04:28:44 AM	-38.5056	154.7605	→ 94°	529.0	609.0	41000.0	Level	Aus ATC (ADS-B)
Mon 04:28:49 AM	-38.5063	154.7758	→ 93°	529.0	609.0	41000.0	Level	Aus ATC (ADS-B)
Mon 04:28:59 AM	-38.5077	154.8072	→ 93°	529.0	609.0	41000.0	Level	Aus ATC (ADS-B)
Mon 04:29:04 AM	-38.5083	154.8226	→ 93°	529.0	609.0	41000.0	Level	Aus ATC (ADS-B)
Mon 04:29:14 AM	-38.5097	154.8533	→ 93°	529.0	609.0	41000.0	Level	Aus ATC (ADS-B)
Mon 04:29:29 AM	-38.5117	154.9008	→ 93°	557.0	641.0	41000.0	Level	Aus ATC (ADS-B)
Mon 04:29:44 AM	-38.5132	154.9327	→ 93°	557.0	641.0	41000.0	Level	Aus ATC (ADS-B)
Mon 05:46:55 AM	-38.274	168.941	→ 84°	502.0	578.0	41000.0	Level	FlightAware ADS-B (RAG / NZRA)
Mon 05:53:14 AM	-38.1827	170.0521	→ 84°	501.0	577.0	41000.0	Level	FlightAware ADS-B (NZRW)
Mon 05:53:47 AM	-38.1744	170.1486	→ 84°	501.0	577.0	41000.0	Level	FlightAware ADS-B (NZRW)
Mon 05:54:29 AM	-38.1634	170.2723	→ 84°	500.0	575.0	41000.0	Level	FlightAware ADS-B (NZRW)
Mon 05:55:02 AM	-38.1548	170.3688	→ 84°	500.0	575.0	41000.0	Level	FlightAware ADS-B (NZRW)
Mon 05:55:44 AM	-38.1437	170.492	→ 84°	499.0	574.0	41000.0	Level	FlightAware ADS-B (AKL / NZAA)
Mon 05:56:30 AM	-38.1314	170.6263	→ 83°	500.0	575.0	41000.0	Level	FlightAware ADS-B (AKL / NZAA)
Mon 05:57:00 AM	-38.1232	170.7142	→ 83°	499.0	574.0	41000.0	Level	FlightAware ADS-B (AKL / NZAA)
Mon 05:57:31 AM	-38.1148	170.8015	→ 82°	500.0	575.0	41000.0	Level	FlightAware ADS-B (AKL / NZAA)
Mon 05:58:01 AM	-38.0976	170.8874	→ 72°	502.0	578.0	41000.0	Level	FlightAware ADS-B (AKL / NZAA)
Mon 05:58:31 AM	-38.0707	170.9677	→ 66°	501.0	577.0	41000.0	Level	FlightAware ADS-B (NZRW)
Mon 05:59:10 AM	-38.0333	171.0729	→ 66°	500.0	575.0	41000.0	Level	FlightAware ADS-B (AKL / NZAA)
Mon 05:59:40 AM	-38.0046	171.1528	→ 66°	500.0	575.0	41000.0	Level	FlightAware ADS-B (AKL / NZAA)
Mon 06:00:16 AM	-37.9704	171.2479	→ 66°	499.0	574.0	41000.0	Level	FlightAware ADS-B (AKL / NZAA)
Mon 06:00:48 AM	-37.9403	171.3314	↗ 65°	498.0	573.0	41000.0	Level	FlightAware ADS-B (AKL / NZAA)
Mon 06:01:18 AM	-37.9133	171.4062	↗ 65°	498.0	573.0	41000.0	Level	FlightAware ADS-B (AKL / NZAA)
Mon 06:01:48 AM	-37.8847	171.485	↗ 65°	498.0	573.0	41000.0	Level	FlightAware ADS-B (AKL / NZAA)
Mon 06:02:18 AM	-37.8534	171.5715	↗ 65°	498.0	573.0	41000.0	Level	FlightAware ADS-B (AKL / NZAA)
Mon 06:02:48 AM	-37.8238	171.6527	↗ 65°	497.0	572.0	41000.0	Level	FlightAware ADS-B (AKL / NZAA)
Mon 06:03:18 AM	-37.7949	171.7317	↗ 65°	497.0	572.0	41000.0	Level	FlightAware ADS-B (AKL / NZAA)
Mon 06:03:48 AM	-37.7657	171.8114	↗ 65°	496.0	571.0	41000.0	Level	FlightAware ADS-B (AKL / NZAA)
Mon 06:04:19 AM	-37.7371	171.8893	↗ 65°	495.0	570.0	41000.0	Level	FlightAware ADS-B (AKL / NZAA)
Mon 06:04:49 AM	-37.7074	171.9701	↗ 65°	496.0	571.0	41000.0	Level	FlightAware ADS-B (AKL / NZAA)
Mon 06:05:19 AM	-37.6784	172.0488	↗ 65°	495.0	570.0	41000.0	Level	FlightAware ADS-B (ROT / NZRO)
Mon 06:05:49 AM	-37.6506	172.124	↗ 65°	494.0	568.0	41000.0	Level	FlightAware ADS-B (AKL / NZAA)
Mon 06:06:19 AM	-37.6204	172.2054	↗ 65°	492.0	566.0	41000.0	Level	FlightAware ADS-B (AKL / NZAA)
Mon 06:06:49 AM	-37.5913	172.2835	↗ 65°	492.0	566.0	41000.0	Level	FlightAware ADS-B (AKL / NZAA)
Mon 06:07:19 AM	-37.5625	172.3609	↗ 65°	491.0	565.0	41000.0	-225 Descending	FlightAware ADS-B (AKL / NZAA)
Mon 06:07:49 AM	-37.5338	172.4377	↗ 65°	477.0	549.0	40775.0	-1,225 Descending	FlightAware ADS-B (NZRW)
Mon 06:08:19 AM	-37.5059	172.5119	↗ 65°	473.0	544.0	39775.0	-2,175 Descending	FlightAware ADS-B (ROT / NZRO)
Mon 06:08:49 AM	-37.4779	172.5871	↗ 65°	473.0	544.0	38600.0	-2,375 Descending	FlightAware ADS-B (NZPK)
Mon 06:09:19 AM	-37.4503	172.6602	↗ 65°	472.0	543.0	37400.0	-2,475 Descending	FlightAware ADS-B (ROT / NZRO)
Mon 06:09:49 AM	-37.422	172.7349	↗ 65°	474.0	545.0	36125.0	-2,700 Descending	FlightAware ADS-B (AKL / NZAA)
Mon 06:10:19 AM	-37.3929	172.8117	↗ 65°	479.0	551.0	34700.0	-2,625 Descending	FlightAware ADS-B (AKL / NZAA)
Mon 06:10:49 AM	-37.365	172.8853	↗ 65°	479.0	551.0	33500.0	-2,200 Descending	FlightAware ADS-B (NZRW)
Mon 06:11:19 AM	-37.3364	172.9607	↗ 65°	473.0	544.0	32500.0	-1,992 Descending	FlightAware ADS-B (ROT / NZRO)
Mon 06:11:50 AM	-37.3078	173.0357	↗ 65°	466.0	536.0	31475.0	-2,041 Descending	FlightAware ADS-B (NZPK)
Mon 06:12:20 AM	-37.2801	173.1084	↗ 64°	461.0	531.0	30425.0	-2,100 Descending	FlightAware ADS-B (NZRW)
Mon 06:12:50 AM	-37.2523	173.1809	↗ 64°	457.0	526.0	29375.0	-2,153 Descending	FlightAware ADS-B (NZPK)
Mon 06:13:22 AM	-37.2218	173.2604	↗ 64°	453.0	521.0	28200.0	-2,056 Descending	FlightAware ADS-B (AKL / NZAA)
Mon 06:13:52 AM	-37.1955	173.3286	↗ 64°	447.0	514.0	27250.0	-2,025 Descending	FlightAware ADS-B (AKL / NZAA)
Mon 06:14:22 AM	-37.1692	173.3966	↗ 64°	444.0	511.0	26175.0	-2,100 Descending	FlightAware ADS-B (NZRW)
Mon 06:15:02 AM	-37.1422	173.4931	→ 76°	437.0	503.0	24800.0	-2,606 Descending	FlightAware ADS-B (NZRW)
Mon 06:15:42 AM	-37.1254	173.5941	→ 78°	448.0	516.0	22700.0	-2,700 Descending	FlightAware ADS-B (NZRW)
Mon 06:16:12 AM	-37.1131	173.6686	→ 78°	442.0	509.0	21650.0	-2,100 Descending	FlightAware ADS-B (NZRW)
Mon 06:16:42 AM	-37.1005	173.745	→ 79°	435.0	501.0	20600.0	-2,125 Descending	FlightAware ADS-B (NZRW)
Mon 06:17:12 AM	-37.088	173.8202	→ 78°	427.0	491.0	19525.0	-2,450 Descending	FlightAware ADS-B (NZWP)
Mon 06:17:42 AM	-37.0757	173.8937	→ 79°	430.0	495.0	18150.0	-2,400 Descending	FlightAware ADS-B (NZWP)
Mon 06:18:12 AM	-37.0636	173.9676	→ 79°	430.0	495.0	17125.0	-1,721 Descending	FlightAware ADS-B (NZWP)
Mon 06:18:43 AM	-37.0512	174.0406	→ 78°	414.0	476.0	16400.0	-1,476 Descending	FlightAware ADS-B (NZPI)
Mon 06:19:14 AM	-37.0392	174.1114	→ 78°	403.0	464.0	15600.0	-1,770 Descending	FlightAware ADS-B (NZME)
Mon 06:19:44 AM	-37.0279	174.1767	→ 78°	394.0	453.0	14600.0	-2,025 Descending	FlightAware ADS-B (NZPK)
Mon 06:20:14 AM	-37.0161	174.246	→ 78°	387.0	445.0	13575.0	-2,175 Descending	FlightAware ADS-B (NZME)
Mon 06:20:44 AM	-37.0052	174.3102	→ 78°	380.0	437.0	12425.0	-2,100 Descending	FlightAware ADS-B (RAG / NZRA)
Mon 06:21:14 AM	-36.9946	174.3724	→ 78°	375.0	432.0	11475.0	-1,900 Descending	FlightAware ADS-B (NZPK)
Mon 06:21:44 AM	-36.9832	174.4363	→ 76°	369.0	425.0	10525.0	-2,050 Descending	FlightAware ADS-B (AKL / NZAA)
Mon 06:22:14 AM	-36.9684	174.4963	→ 71°	364.0	419.0	9425.0	-2,200 Descending	FlightAware ADS-B (NZBC)
Mon 06:22:44 AM	-36.9522	174.5553	→ 71°	362.0	417.0	8325.0	-1,625 Descending	FlightAware ADS-B (NZMB)
Mon 06:23:14 AM	-36.9359	174.6146	→ 71°	345.0	397.0	7800.0	-925 Descending	FlightAware ADS-B (NZPK)
Mon 06:23:44 AM	-36.9211	174.6684	→ 71°	326.0	375.0	7400.0	-1,975 Descending	FlightAware ADS-B (NZWP)
Mon 06:24:14 AM	-36.9062	174.7227	→ 72°	345.0	397.0	5825.0	-2,327 Descending	FlightAware ADS-B (NZWP)
Mon 06:24:33 AM	-36.8981	174.7624	→ 78°	334.0	384.0	5500.0	-673 Descending	FlightAware ADS-B (AKL / NZAA)
Mon 06:25:03 AM	-36.8905	174.8146	→ 80°	309.0	356.0	5275.0	-450 Descending	FlightAware ADS-B (NZPK)
Mon 06:25:33 AM	-36.8832	174.8657	→ 80°	288.0	331.0	5050.0	-575 Descending	FlightAware ADS-B (AKL / NZAA)
Mon 06:26:03 AM	-36.8764	174.9127	→ 80°	275.0	316.0	4700.0	-800 Descending	FlightAware ADS-B (NZWP)
Mon 06:26:33 AM	-36.8697	174.9604	→ 81°	265.0	305.0	4250.0	-734 Descending	FlightAware ADS-B (AKL / NZAA)
Mon 06:26:50 AM	-36.8711	174.9846	→ 104°	245.0	282.0	4125.0	-545 Descending	FlightAware ADS-B (RAG / NZRA)
Mon 06:27:06 AM	-36.8788	175.0034	↘ 121°	232.0	267.0	3950.0	-797 Descending	FlightAware ADS-B (NZPK)
Mon 06:27:22 AM	-36.8916	175.0163	↘ 151°	215.0	247.0	3700.0	-913 Descending	FlightAware ADS-B (AKL / NZAA)
Mon 06:27:52 AM	-36.9187	175.029	↓ 162°	198.0	228.0	3250.0	-625 Descending	FlightAware ADS-B (AKL / NZAA)
Mon 06:28:10 AM	-36.9338	175.0294	↓ 190°	183.0	211.0	3200.0	-257 Descending	FlightAware ADS-B (AKL / NZAA)
Mon 06:28:27 AM	-36.9459	175.0189	↙ 227°	180.0	207.0	3100.0	-318 Descending	FlightAware ADS-B (RAG / NZRA)
Mon 06:28:43 AM	-36.9513	175.004	← 250°	182.0	209.0	3025.0	-474 Descending	FlightAware ADS-B (AKL / NZAA)
Mon 06:29:05 AM	-36.9578	174.9813	← 250°	182.0	209.0	2800.0	-789 Descending	FlightAware ADS-B (AKL / NZAA)
Mon 06:29:21 AM	-36.9618	174.9672	← 251°	180.0	207.0	2525.0	-984 Descending	FlightAware ADS-B (NZWP)
Mon 06:29:37 AM	-36.9661	174.9517	← 252°	174.0	200.0	2275.0	-891 Descending	FlightAware ADS-B (NZPK)
Mon 06:29:53 AM	-36.9703	174.9367	← 252°	166.0	191.0	2050.0	-891 Descending	FlightAware ADS-B (AKL / NZAA)
Mon 06:30:09 AM	-36.9744	174.9219	← 251°	151.0	174.0	1800.0	-821 Descending	FlightAware ADS-B (NZPK)
Mon 06:30:35 AM	-36.9802	174.9011	← 252°	135.0	155.0	1475.0	-700 Descending	FlightAware ADS-B (AKL / NZAA)
Mon 06:30:54 AM	-36.9836	174.8892	← 252°	118.0	136.0	1275.0	-643 Descending	FlightAware ADS-B (AKL / NZAA)
Mon 06:31:10 AM	-36.9866	174.878	← 252°	121.0	139.0	1100.0	-656 Descending	FlightAware ADS-B (AKL / NZAA)
Mon 06:31:26 AM	-36.9895	174.8678	← 251°	119.0	137.0	925.0	-609 Descending	FlightAware ADS-B (AKL / NZAA)
Mon 06:31:42 AM	-36.9914	174.8606	← 251°	120.0	138.0	775.0	-609 Descending	FlightAware ADS-B (AKL / NZAA)
Mon 06:31:58 AM	-36.9949	174.8481	← 251°	121.0	139.0	600.0	-656 Descending	FlightAware ADS-B (AKL / NZAA)
Mon 06:32:14 AM	-36.998	174.837	← 252°	117.0	135.0	425.0	-656 Descending	FlightAware ADS-B (AKL / NZAA)
