# Supplementary material for: TrackMatcher – a tool for finding intercepts in tracks of geographical positions
Source: Copernicus journal article supplement (doi:10.5194/gmd-15-7557-2022), 2022-10-18
Supplement: Supplementary file 1 [file gmd-15-7557-2022-supplement.zip › ESM/example/data/flights/CCA838_27-JAN-2019_PHNL-ZBAA.dat]

Time (CET)	Latitude	Longitude	Course	kts	mph	feet	Rate	Reporting Facility
Sun 09:04:17 AM	21.3048	-157.8981	↘ 115°	179.0	206.0	1050.0	Level	FlightAware ADS-B (PHNL)
Sun 09:04:33 AM	21.2951	-157.8884	↘ 154°	192.0	221.0	1575.0	2,016 Climbing	FlightAware ADS-B (PHIK)
Sun 09:04:49 AM	21.2821	-157.8841	↓ 166°	187.0	215.0	2125.0	1,734 Climbing	FlightAware ADS-B (PHNL)
Sun 09:05:05 AM	21.2672	-157.8805	↓ 169°	202.0	232.0	2500.0	1,067 Climbing	FlightAware ADS-B (PHNL)
Sun 09:05:34 AM	21.2399	-157.8748	↓ 169°	240.0	276.0	2925.0	1,220 Climbing	FlightAware ADS-B (PHNL)
Sun 09:06:04 AM	21.2025	-157.8661	↓ 167°	271.0	312.0	3700.0	1,895 Climbing	FlightAware ADS-B (PHHI)
Sun 09:06:31 AM	21.1686	-157.8588	↓ 171°	285.0	328.0	4725.0	2,547 Climbing	FlightAware ADS-B (PHNL)
Sun 09:06:47 AM	21.1477	-157.861	↓ 197°	288.0	331.0	5525.0	3,000 Climbing	FlightAware ADS-B (PHIK)
Sun 09:07:07 AM	21.1269	-157.8769	↙ 228°	286.0	329.0	6525.0	2,750 Climbing	FlightAware ADS-B (PHHI)
Sun 09:07:23 AM	21.1154	-157.8958	← 248°	288.0	331.0	7175.0	2,375 Climbing	FlightAware ADS-B (PHHI)
Sun 09:07:43 AM	21.1119	-157.9244	← 268°	293.0	337.0	7950.0	2,750 Climbing	FlightAware ADS-B (PHHI)
Sun 09:08:05 AM	21.1111	-157.9559	← 269°	288.0	331.0	9100.0	2,707 Climbing	FlightAware ADS-B (PHNL)
Sun 09:08:24 AM	21.1101	-157.9836	← 267°	296.0	341.0	9800.0	1,988 Climbing	FlightAware ADS-B (PHIK)
Sun 09:08:48 AM	21.1078	-158.0197	← 267°	309.0	356.0	10525.0	1,361 Climbing	FlightAware ADS-B (MUE / PHMU)
Sun 09:09:18 AM	21.1047	-158.068	← 267°	343.0	395.0	11025.0	1,437 Climbing	FlightAware ADS-B (PHHI)
Sun 09:09:59 AM	21.1012	-158.1397	← 267°	364.0	419.0	12225.0	2,113 Climbing	FlightAware ADS-B (PHNL)
Sun 09:10:29 AM	21.0979	-158.1941	← 266°	366.0	421.0	13525.0	2,350 Climbing	FlightAware ADS-B (PHNL)
Sun 09:10:59 AM	21.0944	-158.2491	← 267°	373.0	429.0	14575.0	2,375 Climbing	FlightAware ADS-B (PHNL)
Sun 09:11:29 AM	21.0917	-158.3043	← 267°	371.0	427.0	15900.0	2,529 Climbing	FlightAware ADS-B (PHNL)
Sun 09:11:50 AM	21.0899	-158.3424	← 267°	373.0	429.0	16725.0	2,311 Climbing	FlightAware ADS-B (PHNL)
Sun 09:12:06 AM	21.0882	-158.373	← 268°	372.0	428.0	17325.0	3,115 Climbing	FlightAware ADS-B (PHNL)
Sun 09:12:29 AM	21.0859	-158.4132	← 268°	356.0	410.0	18750.0	3,450 Climbing	FlightAware ADS-B (OGG / PHOG)
Sun 09:12:56 AM	21.0837	-158.4615	← 268°	341.0	392.0	20200.0	2,553 Climbing	FlightAware ADS-B (PHNL)
Sun 09:13:26 AM	21.0827	-158.5103	← 271°	342.0	394.0	21175.0	1,896 Climbing	FlightAware ADS-B (MUE / PHMU)
Sun 09:13:49 AM	21.0896	-158.5499	← 288°	348.0	400.0	21875.0	1,670 Climbing	FlightAware ADS-B (PHNL)
Sun 09:14:10 AM	21.0994	-158.5838	← 288°	351.0	404.0	22400.0	1,471 Climbing	FlightAware ADS-B (OGG / PHOG)
Sun 09:14:40 AM	21.1131	-158.6338	← 286°	358.0	412.0	23125.0	1,597 Climbing	FlightAware ADS-B (PHNL)
Sun 09:15:12 AM	21.1287	-158.6912	← 286°	360.0	414.0	24050.0	1,573 Climbing	FlightAware ADS-B (LIH / PHLI)
Sun 09:15:42 AM	21.1417	-158.7384	← 287°	361.0	415.0	24750.0	1,746 Climbing	FlightAware ADS-B (KOA / PHKO)
Sun 09:16:13 AM	21.1571	-158.7943	← 286°	356.0	410.0	25825.0	2,090 Climbing	FlightAware ADS-B (LIH / PHLI)
Sun 09:16:43 AM	21.1706	-158.8439	← 286°	347.0	399.0	26875.0	1,525 Climbing	FlightAware ADS-B (LIH / PHLI)
Sun 09:17:13 AM	21.1843	-158.8937	← 287°	353.0	406.0	27350.0	675 Climbing	FlightAware ADS-B (LIH / PHLI)
Sun 09:17:43 AM	21.1986	-158.9452	← 286°	364.0	419.0	27550.0	650 Climbing	FlightAware ADS-B (LIH / PHLI)
Sun 09:18:13 AM	21.2131	-158.998	← 286°	370.0	426.0	28000.0	925 Climbing	FlightAware ADS-B (LIH / PHLI)
Sun 09:18:43 AM	21.2275	-159.0507	← 286°	373.0	429.0	28475.0	950 Climbing	FlightAware ADS-B (LIH / PHLI)
Sun 09:19:13 AM	21.242	-159.1042	← 286°	376.0	433.0	28950.0	875 Climbing	FlightAware ADS-B (LIH / PHLI)
Sun 09:19:43 AM	21.2561	-159.1559	← 287°	379.0	436.0	29350.0	850 Climbing	FlightAware ADS-B (MUE / PHMU)
Sun 09:20:13 AM	21.2715	-159.2125	← 286°	384.0	442.0	29800.0	650 Climbing	FlightAware ADS-B (LIH / PHLI)
Sun 09:20:43 AM	21.2864	-159.2671	← 286°	390.0	449.0	30000.0	200 Climbing	FlightAware ADS-B (PHIK)
Sun 09:21:13 AM	21.3019	-159.3244	← 286°	389.0	448.0	30000.0	Level	FlightAware ADS-B (LIH / PHLI)
Sun 09:21:43 AM	21.3171	-159.3802	← 286°	402.0	463.0	30000.0	Level	FlightAware ADS-B (PHIK)
Sun 09:22:13 AM	21.3326	-159.4372	← 286°	410.0	472.0	30000.0	Level	FlightAware ADS-B (PHIK)
Sun 09:22:43 AM	21.3485	-159.4963	← 286°	410.0	472.0	30000.0	Level	FlightAware ADS-B (PHIK)
Sun 09:23:13 AM	21.3642	-159.5546	← 286°	410.0	472.0	30000.0	Level	FlightAware ADS-B (PHIK)
Sun 09:23:43 AM	21.3799	-159.6131	← 286°	409.0	471.0	30000.0	Level	FlightAware ADS-B (PHIK)
Sun 09:24:13 AM	21.3957	-159.6718	← 286°	409.0	471.0	30000.0	Level	FlightAware ADS-B (PHIK)
Sun 09:24:43 AM	21.4114	-159.7303	← 286°	408.0	470.0	30000.0	Level	FlightAware ADS-B (PHIK)
Sun 09:25:38 AM	21.4397	-159.8359	← 286°	408.0	470.0	30000.0	Level	FlightAware ADS-B (KOA / PHKO)
Sun 09:26:09 AM	21.456	-159.8969	← 286°	409.0	471.0	30000.0	Level	FlightAware ADS-B (KOA / PHKO)
Sun 09:26:54 AM	21.4791	-159.9834	← 287°	409.0	471.0	30000.0	Level	FlightAware ADS-B (OGG / PHOG)
Sun 09:27:24 AM	21.4933	-160.0367	← 287°	408.0	470.0	30000.0	Level	FlightAware ADS-B (OGG / PHOG)
Sun 09:27:53 AM	21.5096	-160.0977	← 287°	408.0	470.0	30000.0	Level	FlightAware ADS-B (OGG / PHOG)
Sun 09:28:23 AM	21.5256	-160.158	← 286°	408.0	470.0	30000.0	Level	FlightAware ADS-B (PHNL)
Sun 09:28:53 AM	21.5411	-160.2166	← 286°	407.0	468.0	30000.0	Level	FlightAware ADS-B (PHNL)
Sun 09:29:23 AM	21.5564	-160.2742	← 287°	407.0	468.0	30000.0	Level	FlightAware ADS-B (PHNL)
Sun 09:29:53 AM	21.5722	-160.3339	← 286°	407.0	468.0	30000.0	Level	FlightAware ADS-B (PHNL)
Sun 09:30:23 AM	21.5876	-160.3921	← 286°	408.0	470.0	30000.0	Level	FlightAware ADS-B (PHNL)
Sun 09:30:53 AM	21.6027	-160.4495	← 286°	408.0	470.0	30000.0	Level	FlightAware ADS-B (PHNL)
Sun 09:31:23 AM	21.6183	-160.5088	← 286°	407.0	468.0	30000.0	Level	FlightAware ADS-B (PHNL)
Sun 09:31:54 AM	21.6339	-160.568	← 286°	406.0	467.0	30000.0	Level	FlightAware ADS-B (PHNL)
Sun 09:32:24 AM	21.6492	-160.6265	← 286°	407.0	468.0	30000.0	Level	FlightAware ADS-B (PHNL)
Sun 09:32:54 AM	21.664	-160.6829	← 286°	407.0	468.0	30000.0	Level	FlightAware ADS-B (PHNL)
Sun 09:33:25 AM	21.6798	-160.7435	← 287°	407.0	468.0	30000.0	Level	FlightAware ADS-B (OGG / PHOG)
Sun 09:33:54 AM	21.6946	-160.8	← 287°	406.0	467.0	30000.0	Level	FlightAware ADS-B (OGG / PHOG)
Sun 09:34:29 AM	21.7125	-160.8685	← 286°	407.0	468.0	30000.0	Level	FlightAware ADS-B (PHNL)
Sun 09:35:17 AM	21.7365	-160.9611	← 286°	407.0	468.0	30000.0	Level	FlightAware ADS-B (PHNL)
Sun 09:35:53 AM	21.7557	-161.035	← 286°	407.0	468.0	30000.0	Level	FlightAware ADS-B (PHNL)
Sun 09:36:24 AM	21.7711	-161.0941	← 286°	408.0	470.0	30000.0	Level	FlightAware ADS-B (PHNL)
Sun 09:37:24 AM	21.8013	-161.211	← 285°	408.0	470.0	30000.0	Level	FlightAware ADS-B (PHNL)
Sun 09:37:54 AM	21.8165	-161.2701	← 285°	408.0	470.0	30000.0	Level	FlightAware ADS-B (PHNL)
Sun 09:38:24 AM	21.8315	-161.3283	← 285°	407.0	468.0	30000.0	Level	FlightAware ADS-B (PHNL)
Sun 09:38:54 AM	21.8466	-161.3871	← 285°	405.0	466.0	30000.0	Level	FlightAware ADS-B (PHNL)
Sun 09:39:24 AM	21.8614	-161.4444	← 285°	407.0	468.0	30000.0	Level	FlightAware ADS-B (PHNL)
Sun 09:39:55 AM	21.8768	-161.5044	← 285°	408.0	470.0	30000.0	Level	FlightAware ADS-B (PHNL)
Sun 09:40:25 AM	21.8919	-161.5632	← 286°	407.0	468.0	30000.0	Level	FlightAware ADS-B (PHNL)
Sun 09:40:55 AM	21.9116	-161.6203	← 294°	403.0	464.0	30000.0	Level	FlightAware ADS-B (PHNL)
Sun 09:41:25 AM	21.9374	-161.6734	← 301°	399.0	459.0	30000.0	Level	FlightAware ADS-B (PHNL)
Sun 09:42:00 AM	21.9742	-161.7302	← 308°	396.0	456.0	30000.0	Level	FlightAware ADS-B (PHNL)
Sun 09:42:35 AM	22.0156	-161.7787	↖ 317°	395.0	455.0	30000.0	Level	FlightAware ADS-B (OGG / PHOG)
Sun 09:43:19 AM	22.0753	-161.8416	← 315°	395.0	455.0	30000.0	Level	FlightAware ADS-B (PHNL)
Sun 09:43:55 AM	22.1213	-161.8905	↖ 316°	393.0	452.0	30000.0	Level	FlightAware ADS-B (OGG / PHOG)
Sun 09:44:34 AM	22.172	-161.9443	← 315°	395.0	455.0	30000.0	Level	FlightAware ADS-B (PHNL)
Sun 09:45:35 AM	22.2517	-162.0289	↖ 316°	393.0	452.0	30000.0	Level	FlightAware ADS-B (OGG / PHOG)
Sun 09:46:05 AM	22.2902	-162.0698	↖ 316°	392.0	451.0	30000.0	Level	FlightAware ADS-B (OGG / PHOG)
Sun 09:47:31 AM	22.3833	-162.1667	↖ 316°	390.0	449.0	30000.0	Level	Honolulu Center
Sun 09:48:31 AM	22.4667	-162.25	↖ 317°	390.0	449.0	30000.0	Level	Honolulu Center
Sun 09:49:31 AM	22.5333	-162.3333	← 311°	400.0	460.0	30000.0	Level	Honolulu Center
Sun 09:50:31 AM	22.6167	-162.4167	↖ 317°	390.0	449.0	30000.0	Level	Honolulu Center
Sun 09:51:31 AM	22.7	-162.5	↖ 317°	390.0	449.0	30000.0	Level	Honolulu Center
Sun 09:52:31 AM	22.7833	-162.5833	↖ 317°	390.0	449.0	30000.0	Level	Honolulu Center
Sun 09:53:31 AM	22.8833	-162.6333	↖ 335°	390.0	449.0	30000.0	Level	Honolulu Center
Sun 09:54:32 AM	22.9833	-162.65	↑ 351°	400.0	460.0	30000.0	Level	Honolulu Center
Sun 09:55:31 AM	23.1	-162.6833	↑ 345°	400.0	460.0	30000.0	Level	Honolulu Center
Sun 09:56:32 AM	23.2	-162.7167	↑ 343°	400.0	460.0	30000.0	Level	Honolulu Center
Sun 09:57:32 AM	23.3167	-162.7333	↑ 353°	400.0	460.0	30000.0	Level	Honolulu Center
Sun 09:58:32 AM	23.4167	-162.7667	↑ 343°	400.0	460.0	30000.0	Level	Honolulu Center
Sun 09:59:32 AM	23.5333	-162.7833	↑ 353°	400.0	460.0	30000.0	Level	Honolulu Center
Sun 10:00:32 AM	23.6333	-162.8167	↑ 343°	390.0	449.0	30000.0	Level	Honolulu Center
Sun 10:01:32 AM	23.75	-162.85	↑ 345°	400.0	460.0	30000.0	Level	Honolulu Center
Sun 10:02:32 AM	23.85	-162.8667	↑ 351°	390.0	449.0	30000.0	Level	Honolulu Center
Sun 10:03:33 AM	23.95	-162.9	↑ 343°	380.0	437.0	30000.0	Level	Honolulu Center
Sun 10:14:23 AM	25.0833	-163.2	↑ 347°	419.0	482.0	30000.0	Level	Oakland Oceanic
Sun 10:16:16 AM	25.3394	-163.2657	↑ 347°	419.0	482.0	30000.0	Level	FlightAware Transoceanic
Sun 10:18:36 AM	25.603	-163.3336	↑ 347°	419.0	482.0	30000.0	Level	FlightAware Transoceanic
Sun 10:20:04 AM	25.7687	-163.3764	↑ 347°	419.0	482.0	30000.0	Level	FlightAware Transoceanic
Sun 10:21:39 AM	25.9475	-163.4228	↑ 347°	419.0	482.0	30000.0	Level	FlightAware Transoceanic
Sun 10:22:48 AM	26.0774	-163.4566	↑ 347°	419.0	482.0	30000.0	Level	FlightAware Transoceanic
Sun 10:24:16 AM	26.0667	-163.45	↑ 347°	417.0	480.0	30000.0	Level	Oakland Oceanic
Sun 10:33:35 AM	27.0333	-163.7	↑ 347°	415.0	478.0	30000.0	Level	Oakland Oceanic
Sun 10:35:16 AM	27.2882	-163.7679	↑ 347°	415.0	478.0	30000.0	Level	FlightAware Transoceanic
Sun 10:36:36 AM	27.4382	-163.808	↑ 347°	415.0	478.0	30000.0	Level	FlightAware Transoceanic
Sun 10:38:11 AM	27.6162	-163.8557	↑ 347°	415.0	478.0	30000.0	Level	FlightAware Transoceanic
Sun 10:40:04 AM	27.8279	-163.9127	↑ 347°	415.0	478.0	30000.0	Level	FlightAware Transoceanic
Sun 10:41:40 AM	28.0078	-163.9613	↑ 347°	415.0	478.0	30000.0	Level	FlightAware Transoceanic
Sun 10:43:41 AM	28.0333	-163.9667	↑ 347°	411.0	473.0	30000.0	Level	Oakland Oceanic
Sun 10:43:44 AM	28.2401	-164.0243	↑ 347°	415.0	478.0	30000.0	Level	FlightAware Transoceanic
Sun 10:46:40 AM	28.4396	-164.0775	↑ 347°	411.0	473.0	30000.0	Level	FlightAware Transoceanic
Sun 10:47:51 AM	28.5707	-164.1133	↑ 346°	411.0	473.0	30000.0	Level	FlightAware Transoceanic
Sun 10:49:39 AM	28.7701	-164.168	↑ 346°	411.0	473.0	30000.0	Level	FlightAware Transoceanic
Sun 10:52:13 AM	29.0544	-164.2464	↑ 346°	411.0	473.0	30000.0	Level	FlightAware Transoceanic
Sun 10:52:46 AM	29.0	-164.2333	↑ 346°	409.0	471.0	30000.0	Level	Oakland Oceanic
Sun 10:55:08 AM	29.2375	-164.2987	↑ 346°	409.0	471.0	30000.0	Level	FlightAware Transoceanic
Sun 10:56:36 AM	29.4007	-164.344	↑ 346°	409.0	471.0	30000.0	Level	FlightAware Transoceanic
Sun 10:58:09 AM	29.5732	-164.392	↑ 346°	409.0	471.0	30000.0	Level	FlightAware Transoceanic
Sun 10:59:18 AM	29.7012	-164.4278	↑ 346°	409.0	471.0	30000.0	Level	FlightAware Transoceanic
Sun 11:00:18 AM	29.8125	-164.4589	↑ 346°	409.0	471.0	30000.0	Level	FlightAware Transoceanic
Sun 11:01:38 AM	29.9608	-164.5006	↑ 346°	409.0	471.0	30000.0	Level	FlightAware Transoceanic
Sun 11:02:24 AM	29.9167	-164.4833	↑ 346°	389.0	448.0	30000.0	Level	Oakland Oceanic
Sun 11:04:36 AM	30.1869	-164.5594	↑ 346°	389.0	448.0	30000.0	Level	FlightAware Transoceanic
Sun 11:06:40 AM	30.4016	-164.6204	↑ 346°	389.0	448.0	30000.0	Level	FlightAware Transoceanic
Sun 11:07:47 AM	30.5176	-164.6535	↑ 346°	389.0	448.0	30000.0	Level	FlightAware Transoceanic
Sun 11:09:40 AM	30.7132	-164.7094	↑ 346°	389.0	448.0	30000.0	Level	FlightAware Transoceanic
Sun 11:10:44 AM	30.824	-164.7412	↑ 346°	389.0	448.0	30000.0	Level	FlightAware Transoceanic
Sun 11:12:01 AM	30.85	-164.75	↑ 346°	393.0	452.0	30000.0	Level	Oakland Oceanic
Sun 11:15:08 AM	31.1839	-164.8462	↑ 346°	393.0	452.0	30000.0	Level	FlightAware Transoceanic
Sun 11:16:52 AM	31.3685	-164.8998	↑ 346°	393.0	452.0	30000.0	Level	FlightAware Transoceanic
Sun 11:18:11 AM	31.5088	-164.9406	↑ 346°	393.0	452.0	30000.0	Level	FlightAware Transoceanic
Sun 11:19:12 AM	31.6171	-164.9722	↑ 346°	393.0	452.0	30000.0	Level	FlightAware Transoceanic
Sun 11:20:18 AM	31.7342	-165.0064	↑ 346°	393.0	452.0	30000.0	Level	FlightAware Transoceanic
Sun 11:21:35 AM	31.8333	-165.0333	↑ 346°	415.0	478.0	30000.0	Level	Oakland Oceanic
Sun 11:21:39 AM	31.878	-165.0486	↑ 346°	393.0	452.0	30000.0	Level	FlightAware Transoceanic
Sun 11:23:31 AM	32.1084	-165.1142	↑ 346°	415.0	478.0	30000.0	Level	FlightAware Transoceanic
Sun 11:24:36 AM	32.2268	-165.1493	↑ 346°	415.0	478.0	30000.0	Level	FlightAware Transoceanic
Sun 11:26:38 AM	32.449	-165.2154	↑ 346°	415.0	478.0	30000.0	Level	FlightAware Transoceanic
Sun 11:27:50 AM	32.5801	-165.2546	↑ 346°	415.0	478.0	30000.0	Level	FlightAware Transoceanic
Sun 11:30:07 AM	32.8296	-165.3295	↑ 346°	415.0	478.0	30000.0	Level	FlightAware Transoceanic
Sun 11:31:19 AM	32.8333	-165.3333	↑ 346°	399.0	459.0	30000.0	Level	Oakland Oceanic
Sun 11:33:08 AM	33.0646	-165.4026	↑ 346°	399.0	459.0	30000.0	Level	FlightAware Transoceanic
Sun 11:35:08 AM	33.2814	-165.4681	↑ 346°	399.0	459.0	30000.0	Level	FlightAware Transoceanic
Sun 11:36:36 AM	33.4403	-165.5164	↑ 346°	399.0	459.0	30000.0	Level	FlightAware Transoceanic
Sun 11:38:11 AM	33.6119	-165.5687	↑ 346°	399.0	459.0	30000.0	Level	FlightAware Transoceanic
Sun 11:40:36 AM	33.8738	-165.6489	↑ 346°	399.0	459.0	30000.0	Level	FlightAware Transoceanic
Sun 11:40:53 AM	33.85	-165.6333	↑ 345°	375.0	432.0	30000.0	Level	Oakland Oceanic
Sun 11:43:09 AM	34.0749	-165.7039	↑ 345°	375.0	432.0	30000.0	Level	FlightAware Transoceanic
Sun 11:44:37 AM	34.2282	-165.7526	↑ 345°	375.0	432.0	30000.0	Level	FlightAware Transoceanic
Sun 11:46:37 AM	34.4373	-165.8191	↑ 345°	375.0	432.0	30000.0	Level	FlightAware Transoceanic
Sun 11:48:20 AM	34.6168	-165.8765	↑ 345°	375.0	432.0	30000.0	Level	FlightAware Transoceanic
Sun 11:49:39 AM	34.7544	-165.9207	↑ 345°	375.0	432.0	30000.0	Level	FlightAware Transoceanic
Sun 11:50:23 AM	34.8167	-165.9333	↑ 343°	353.0	406.0	30000.0	Level	Oakland Oceanic
Sun 11:53:02 AM	35.0	-166.0	↖ 323°	346.0	398.0	30000.0	Level	Oakland Oceanic
Sun 11:53:07 AM	35.0965	-166.0887	↖ 323°	353.0	406.0	30000.0	Level	FlightAware Transoceanic
Sun 11:55:13 AM	35.2484	-166.2288	↖ 323°	346.0	398.0	30000.0	Level	FlightAware Transoceanic
Sun 11:56:36 AM	35.355	-166.3276	↖ 323°	346.0	398.0	30000.0	Level	FlightAware Transoceanic
Sun 11:58:11 AM	35.477	-166.441	↖ 323°	346.0	398.0	30000.0	Level	FlightAware Transoceanic
Sun 12:00:20 PM	35.6333	-166.5833	↖ 323°	369.0	425.0	30000.0	Level	Oakland Oceanic
Sun 12:00:40 PM	35.7	-166.65	↖ 323°	355.0	409.0	30000.0	Level	Oakland Oceanic
Sun 12:03:09 PM	35.871	-166.8108	↖ 323°	355.0	409.0	30000.0	Level	FlightAware Transoceanic
Sun 12:04:35 PM	35.9848	-166.9185	↖ 323°	355.0	409.0	30000.0	Level	FlightAware Transoceanic
Sun 12:06:44 PM	36.1555	-167.0805	↖ 322°	355.0	409.0	30000.0	Level	FlightAware Transoceanic
Sun 12:08:52 PM	36.3245	-167.2419	↖ 322°	355.0	409.0	30000.0	347 Climbing	FlightAware Transoceanic
Sun 12:09:37 PM	36.4167	-167.3333	↖ 322°	362.0	417.0	31000.0	347 Climbing	Oakland Oceanic
Sun 12:11:45 PM	36.634	-167.5424	↖ 322°	362.0	417.0	31000.0	Level	FlightAware Transoceanic
Sun 12:13:08 PM	36.7432	-167.6481	↖ 322°	362.0	417.0	31000.0	Level	FlightAware Transoceanic
Sun 12:15:07 PM	36.8996	-167.8003	↖ 322°	362.0	417.0	31000.0	Level	FlightAware Transoceanic
Sun 12:16:36 PM	37.0164	-167.9145	↖ 322°	362.0	417.0	31000.0	Level	FlightAware Transoceanic
Sun 12:18:10 PM	37.1397	-168.0355	↖ 322°	362.0	417.0	31000.0	Level	FlightAware Transoceanic
Sun 12:19:13 PM	37.2	-168.1	↖ 322°	347.0	399.0	31000.0	Level	Oakland Oceanic
Sun 12:21:26 PM	37.3863	-168.2839	↖ 322°	347.0	399.0	31000.0	Level	FlightAware Transoceanic
Sun 12:23:09 PM	37.5175	-168.4142	↖ 322°	347.0	399.0	31000.0	Level	FlightAware Transoceanic
Sun 12:24:36 PM	37.6283	-168.5246	↖ 322°	347.0	399.0	31000.0	Level	FlightAware Transoceanic
Sun 12:26:38 PM	37.7834	-168.68	↖ 322°	347.0	399.0	31000.0	240 Climbing	FlightAware Transoceanic
Sun 12:28:46 PM	37.9333	-168.8167	↖ 321°	342.0	394.0	32000.0	200 Climbing	Oakland Oceanic
Sun 12:31:38 PM	38.1294	-169.017	↖ 321°	342.0	394.0	32000.0	Level	FlightAware Transoceanic
Sun 12:33:08 PM	38.2409	-169.1313	↖ 321°	342.0	394.0	32000.0	Level	FlightAware Transoceanic
Sun 12:34:19 PM	38.3288	-169.2218	↖ 321°	342.0	394.0	32000.0	Level	FlightAware Transoceanic
Sun 12:37:23 PM	38.5563	-169.4573	↖ 321°	342.0	394.0	32000.0	Level	FlightAware Transoceanic
Sun 12:38:23 PM	38.6333	-169.5333	↖ 321°	342.0	394.0	32000.0	Level	Oakland Oceanic
Sun 12:48:12 PM	39.3333	-170.2667	↖ 320°	336.0	387.0	32000.0	Level	Oakland Oceanic
Sun 12:50:08 PM	39.4918	-170.4395	↖ 320°	336.0	387.0	32000.0	Level	FlightAware Transoceanic
Sun 12:51:39 PM	39.6042	-170.5626	↖ 320°	336.0	387.0	32000.0	Level	FlightAware Transoceanic
Sun 12:53:08 PM	39.7141	-170.6833	↖ 320°	336.0	387.0	32000.0	Level	FlightAware Transoceanic
Sun 12:55:07 PM	39.8609	-170.8454	↖ 320°	336.0	387.0	32000.0	Level	FlightAware Transoceanic
Sun 12:57:26 PM	40.0375	-171.0339	↖ 325°	336.0	387.0	32000.0	Level	FlightAware Transoceanic
Sun 12:57:42 PM	40.0	-171.0	↖ 325°	332.0	382.0	32000.0	Level	Oakland Oceanic
Sun 01:00:03 PM	40.2287	-171.2079	↖ 325°	332.0	382.0	32000.0	Level	FlightAware Transoceanic
Sun 01:01:38 PM	40.3473	-171.3163	↖ 325°	332.0	382.0	32000.0	Level	FlightAware Transoceanic
Sun 01:03:16 PM	40.4695	-171.4286	↖ 325°	332.0	382.0	32000.0	Level	FlightAware Transoceanic
Sun 01:04:36 PM	40.5692	-171.5205	↖ 325°	332.0	382.0	32000.0	Level	FlightAware Transoceanic
Sun 01:06:39 PM	40.7223	-171.6625	↖ 325°	332.0	382.0	32000.0	Level	FlightAware Transoceanic
Sun 01:07:11 PM	40.7333	-171.6667	↖ 325°	341.0	392.0	32000.0	Level	Oakland Oceanic
Sun 01:09:39 PM	40.9387	-171.859	↖ 325°	341.0	392.0	32000.0	Level	FlightAware Transoceanic
Sun 01:11:35 PM	41.0884	-171.9999	↖ 325°	341.0	392.0	32000.0	Level	FlightAware Transoceanic
Sun 01:13:08 PM	41.2083	-172.1133	↖ 325°	341.0	392.0	32000.0	1,208 Climbing	FlightAware Transoceanic
Sun 01:14:04 PM	41.2333	-172.15	↖ 325°	331.0	381.0	35000.0	1,017 Climbing	Oakland Oceanic
Sun 01:17:04 PM	41.4667	-172.3667	↖ 324°	343.0	395.0	36000.0	167 Climbing	Oakland Oceanic
Sun 01:20:04 PM	41.7057	-172.5965	↖ 324°	343.0	395.0	36000.0	Level	FlightAware Transoceanic
Sun 01:21:56 PM	41.851	-172.737	↖ 324°	343.0	395.0	36000.0	Level	FlightAware Transoceanic
Sun 01:23:32 PM	41.9753	-172.8579	↖ 324°	343.0	395.0	36000.0	Level	FlightAware Transoceanic
Sun 01:24:36 PM	42.0582	-172.9388	↖ 324°	343.0	395.0	36000.0	Level	FlightAware Transoceanic
Sun 01:26:24 PM	42.25	-173.1333	↖ 324°	356.0	410.0	36000.0	Level	Oakland Oceanic
Sun 01:36:00 PM	43.05	-173.9333	↖ 323°	362.0	417.0	36000.0	Level	Oakland Oceanic
Sun 01:38:09 PM	43.2262	-174.1127	↖ 323°	362.0	417.0	36000.0	Level	FlightAware Transoceanic
Sun 01:39:14 PM	43.3148	-174.2037	↖ 323°	362.0	417.0	36000.0	Level	FlightAware Transoceanic
Sun 01:41:39 PM	43.5124	-174.4075	↖ 323°	362.0	417.0	36000.0	Level	FlightAware Transoceanic
Sun 01:43:42 PM	43.6797	-174.5814	↖ 323°	362.0	417.0	36000.0	Level	FlightAware Transoceanic
Sun 01:45:35 PM	43.8667	-174.7667	↖ 323°	374.0	430.0	36000.0	Level	Oakland Oceanic
Sun 01:48:07 PM	44.1201	-175.0374	↖ 322°	374.0	430.0	36000.0	Level	FlightAware Transoceanic
Sun 01:50:07 PM	44.2824	-175.2121	↖ 322°	374.0	430.0	36000.0	Level	FlightAware Transoceanic
Sun 01:51:37 PM	44.404	-175.3438	↖ 322°	374.0	430.0	36000.0	Level	FlightAware Transoceanic
Sun 01:53:13 PM	44.5335	-175.4848	↖ 322°	374.0	430.0	36000.0	Level	FlightAware Transoceanic
Sun 01:55:13 PM	44.65	-175.6167	↖ 322°	377.0	434.0	36000.0	Level	Oakland Oceanic
Sun 01:57:02 PM	44.8281	-175.8111	↖ 322°	377.0	434.0	36000.0	Level	FlightAware Transoceanic
Sun 01:58:07 PM	44.9228	-175.915	↖ 322°	377.0	434.0	36000.0	Level	FlightAware Transoceanic
Sun 01:59:18 PM	45.0	-176.0	↖ 322°	378.0	435.0	36000.0	Level	Oakland Oceanic
Sun 02:04:46 PM	45.45	-176.5	↖ 321°	376.0	433.0	36000.0	Level	Oakland Oceanic
Sun 02:06:38 PM	45.5818	-176.6531	↖ 321°	376.0	433.0	36000.0	Level	FlightAware Transoceanic
Sun 02:07:40 PM	45.6651	-176.7504	↖ 321°	376.0	433.0	36000.0	Level	FlightAware Transoceanic
Sun 02:10:07 PM	45.8622	-176.9821	↖ 321°	376.0	433.0	36000.0	Level	FlightAware Transoceanic
Sun 02:11:36 PM	45.9813	-177.1232	↖ 320°	376.0	433.0	36000.0	Level	FlightAware Transoceanic
Sun 02:13:12 PM	46.1097	-177.276	↖ 320°	376.0	433.0	36000.0	Level	FlightAware Transoceanic
Sun 02:14:33 PM	46.2167	-177.4167	↖ 320°	381.0	438.0	36000.0	Level	Oakland Oceanic
Sun 02:16:35 PM	46.4258	-177.6687	↖ 320°	381.0	438.0	36000.0	Level	FlightAware Transoceanic
Sun 02:18:13 PM	46.5578	-177.8289	↖ 320°	381.0	438.0	36000.0	Level	FlightAware Transoceanic
Sun 02:20:04 PM	46.7069	-178.0112	↖ 320°	381.0	438.0	36000.0	Level	FlightAware Transoceanic
Sun 02:21:38 PM	46.8331	-178.1664	↖ 320°	381.0	438.0	36000.0	Level	FlightAware Transoceanic
Sun 02:23:46 PM	47.0044	-178.3789	↖ 320°	381.0	438.0	36000.0	851 Climbing	FlightAware Transoceanic
Sun 02:23:59 PM	47.0	-178.3667	↖ 320°	390.0	449.0	38000.0	1,008 Climbing	Oakland Oceanic
Sun 02:25:45 PM	47.1419	-178.5448	↖ 319°	390.0	449.0	38000.0	Level	FlightAware Transoceanic
Sun 02:27:08 PM	47.2539	-178.686	↖ 319°	390.0	449.0	38000.0	Level	FlightAware Transoceanic
Sun 02:29:00 PM	47.4047	-178.8775	↖ 319°	390.0	449.0	38000.0	Level	FlightAware Transoceanic
Sun 02:30:06 PM	47.4935	-178.9908	↖ 319°	390.0	449.0	38000.0	Level	FlightAware Transoceanic
Sun 02:31:36 PM	47.6143	-179.146	↖ 319°	390.0	449.0	38000.0	Level	FlightAware Transoceanic
Sun 02:33:08 PM	47.7376	-179.3054	↖ 319°	390.0	449.0	38000.0	Level	FlightAware Transoceanic
Sun 02:33:46 PM	47.7833	-179.3667	↖ 319°	392.0	451.0	38000.0	Level	Oakland Oceanic
Sun 02:43:11 PM	48.5833	179.5833	↖ 318°	391.0	450.0	38000.0	Level	Oakland Oceanic
Sun 02:45:49 PM	48.8184	179.2558	↖ 317°	391.0	450.0	38000.0	Level	FlightAware Transoceanic
Sun 02:47:31 PM	48.9599	179.0568	↖ 317°	391.0	450.0	38000.0	Level	FlightAware Transoceanic
Sun 02:48:27 PM	49.0	179.0	← 309°	397.0	457.0	38000.0	Level	Oakland Oceanic
Sun 02:51:38 PM	49.2448	178.5308	← 308°	397.0	457.0	38000.0	Level	FlightAware Transoceanic
Sun 02:53:08 PM	49.3454	178.3357	← 308°	397.0	457.0	38000.0	Level	FlightAware Transoceanic
Sun 02:55:06 PM	49.4767	178.0788	← 308°	397.0	457.0	38000.0	Level	FlightAware Transoceanic
Sun 02:56:35 PM	49.5753	177.884	← 308°	397.0	457.0	38000.0	Level	FlightAware Transoceanic
Sun 02:58:08 PM	49.6781	177.6797	← 308°	397.0	457.0	38000.0	Level	FlightAware Transoceanic
Sun 02:59:14 PM	49.7508	177.5342	← 308°	397.0	457.0	38000.0	Level	FlightAware Transoceanic
Sun 02:59:30 PM	49.7667	177.5	← 308°	396.0	456.0	38000.0	Level	Anchorage Center
Sun 03:01:37 PM	49.932	177.1661	← 307°	396.0	456.0	38000.0	Level	FlightAware Transoceanic
Sun 03:03:32 PM	50.0525	176.9202	← 307°	396.0	456.0	38000.0	Level	FlightAware Transoceanic
Sun 03:04:36 PM	50.1193	176.7827	← 307°	396.0	456.0	38000.0	Level	FlightAware Transoceanic
Sun 03:06:36 PM	50.2441	176.524	← 307°	396.0	456.0	38000.0	Level	FlightAware Transoceanic
Sun 03:08:47 PM	50.3797	176.24	← 307°	396.0	456.0	38000.0	Level	FlightAware Transoceanic
Sun 03:10:07 PM	50.4622	176.0658	← 307°	396.0	456.0	38000.0	Level	FlightAware Transoceanic
Sun 03:11:37 PM	50.5597	175.8509	← 304°	396.0	456.0	38000.0	Level	FlightAware Transoceanic
Sun 03:13:08 PM	50.6652	175.6065	← 304°	396.0	456.0	38000.0	Level	FlightAware Transoceanic
Sun 03:15:04 PM	50.7988	175.2933	← 304°	396.0	456.0	38000.0	Level	FlightAware Transoceanic
Sun 03:17:05 PM	50.9374	174.9648	← 304°	396.0	456.0	38000.0	Level	FlightAware Transoceanic
Sun 03:18:11 PM	51.0125	174.7847	← 303°	396.0	456.0	38000.0	Level	FlightAware Transoceanic
Sun 03:20:04 PM	51.1406	174.4751	← 303°	396.0	456.0	38000.0	Level	FlightAware Transoceanic
Sun 03:21:39 PM	51.2476	174.2135	← 303°	396.0	456.0	38000.0	Level	FlightAware Transoceanic
Sun 03:23:46 PM	51.3898	173.8618	← 303°	396.0	456.0	38000.0	Level	FlightAware Transoceanic
Sun 03:25:06 PM	51.4788	173.6392	← 303°	396.0	456.0	38000.0	Level	FlightAware Transoceanic
Sun 03:26:37 PM	51.5795	173.3849	← 302°	396.0	456.0	38000.0	Level	FlightAware Transoceanic
Sun 03:28:05 PM	51.6764	173.1379	← 302°	396.0	456.0	38000.0	Level	FlightAware Transoceanic
Sun 03:30:07 PM	51.8099	172.7937	← 302°	396.0	456.0	38000.0	Level	FlightAware Transoceanic
Sun 03:31:48 PM	51.9196	172.5073	← 302°	396.0	456.0	38000.0	Level	FlightAware Transoceanic
Sun 03:33:08 PM	52.006	172.2794	← 302°	396.0	456.0	38000.0	Level	FlightAware Transoceanic
Sun 03:35:06 PM	52.1327	171.9416	← 301°	396.0	456.0	38000.0	Level	FlightAware Transoceanic
Sun 03:36:35 PM	52.2276	171.6856	← 301°	396.0	456.0	38000.0	Level	FlightAware Transoceanic
Sun 03:38:09 PM	52.3272	171.414	← 301°	396.0	456.0	38000.0	Level	FlightAware Transoceanic
Sun 03:40:14 PM	52.4587	171.051	← 301°	396.0	456.0	38000.0	Level	FlightAware Transoceanic
Sun 03:41:37 PM	52.5454	170.8087	← 300°	396.0	456.0	38000.0	Level	FlightAware Transoceanic
Sun 03:43:08 PM	52.6398	170.542	← 300°	396.0	456.0	38000.0	Level	FlightAware Transoceanic
Sun 03:44:50 PM	52.745	170.2417	← 300°	396.0	456.0	38000.0	Level	FlightAware Transoceanic
Sun 03:46:38 PM	52.8556	169.9221	← 300°	396.0	456.0	38000.0	Level	FlightAware Transoceanic
Sun 03:48:59 PM	52.9986	169.5025	← 299°	396.0	456.0	38000.0	Level	FlightAware Transoceanic
Sun 03:50:06 PM	53.066	169.3021	← 299°	396.0	456.0	38000.0	Level	FlightAware Transoceanic
Sun 03:51:36 PM	53.1561	169.032	← 299°	396.0	456.0	38000.0	Level	FlightAware Transoceanic
Sun 03:53:08 PM	53.2475	168.7546	← 299°	396.0	456.0	38000.0	Level	FlightAware Transoceanic
Sun 03:59:27 PM	53.4167	168.2333	← 270°	418.0	481.0	38000.0	Level	Anchorage Center
Sun 03:59:34 PM	53.4167	168.2333	← 270°	419.0	482.0	38000.0	Level	Anchorage Center
Sun 04:01:36 PM	53.4178	167.7047	← 270°	419.0	482.0	38000.0	Level	FlightAware Transoceanic
Sun 04:03:13 PM	53.4173	167.3762	← 270°	419.0	482.0	38000.0	Level	FlightAware Transoceanic
Sun 04:04:36 PM	53.4175	167.0944	← 271°	419.0	482.0	38000.0	Level	FlightAware Transoceanic
Sun 04:06:59 PM	53.4193	166.6074	← 270°	419.0	482.0	38000.0	Level	FlightAware Transoceanic
Sun 04:08:52 PM	53.4194	166.2225	← 270°	419.0	482.0	38000.0	Level	FlightAware Transoceanic
Sun 04:10:06 PM	53.4188	165.9705	← 270°	419.0	482.0	38000.0	Level	FlightAware Transoceanic
Sun 04:12:05 PM	53.4166	165.5652	← 269°	419.0	482.0	38000.0	Level	FlightAware Transoceanic
Sun 04:13:08 PM	53.415	165.3507	← 269°	419.0	482.0	38000.0	Level	FlightAware Transoceanic
Sun 04:15:06 PM	53.4108	164.9489	← 269°	419.0	482.0	38000.0	Level	FlightAware Transoceanic
Sun 04:17:26 PM	53.4041	164.4724	← 268°	419.0	482.0	38000.0	Level	FlightAware Transoceanic
Sun 04:19:38 PM	53.396	164.0232	← 268°	419.0	482.0	38000.0	Level	FlightAware Transoceanic
Sun 04:21:35 PM	53.3875	163.6252	← 268°	419.0	482.0	38000.0	Level	FlightAware Transoceanic
Sun 04:23:24 PM	53.3783	163.2546	← 267°	419.0	482.0	38000.0	Level	FlightAware Transoceanic
Sun 04:24:38 PM	53.3715	163.0031	← 267°	419.0	482.0	38000.0	Level	FlightAware Transoceanic
Sun 04:25:41 PM	53.3652	162.7891	← 267°	419.0	482.0	38000.0	Level	FlightAware Transoceanic
Sun 04:35:42 PM	53.3101	161.056	← 266°	435.0	501.0	38000.0	Level	FlightAware ADS-B (PKC / UHPP)
Sun 04:36:12 PM	53.3059	160.958	← 266°	437.0	503.0	38000.0	Level	FlightAware ADS-B (PKC / UHPP)
Sun 04:36:43 PM	53.3013	160.8514	← 266°	437.0	503.0	38000.0	Level	FlightAware ADS-B (PKC / UHPP)
Sun 04:37:43 PM	53.2923	160.6494	← 266°	439.0	505.0	38000.0	Level	FlightAware ADS-B (PKC / UHPP)
Sun 04:38:43 PM	53.2828	160.4464	← 266°	439.0	505.0	38000.0	Level	FlightAware ADS-B (PKC / UHPP)
Sun 04:39:13 PM	53.278	160.3449	← 265°	439.0	505.0	38000.0	Level	FlightAware ADS-B (PKC / UHPP)
Sun 04:39:43 PM	53.273	160.2443	← 265°	440.0	506.0	38000.0	Level	FlightAware ADS-B (PKC / UHPP)
Sun 04:40:13 PM	53.2679	160.1421	← 265°	440.0	506.0	38000.0	Level	FlightAware ADS-B (PKC / UHPP)
Sun 04:40:43 PM	53.2629	160.0422	← 265°	441.0	507.0	38000.0	Level	FlightAware ADS-B (PKC / UHPP)
Sun 04:41:13 PM	53.2577	159.9399	← 265°	441.0	507.0	38000.0	Level	FlightAware ADS-B (PKC / UHPP)
Sun 04:41:43 PM	53.2523	159.8398	← 265°	440.0	506.0	38000.0	Level	FlightAware ADS-B (PKC / UHPP)
Sun 04:42:13 PM	53.2467	159.7379	← 265°	439.0	505.0	38000.0	Level	FlightAware ADS-B (PKC / UHPP)
Sun 04:43:13 PM	53.2357	159.5381	← 265°	436.0	502.0	38000.0	Level	FlightAware ADS-B (PKC / UHPP)
Sun 04:43:43 PM	53.23	159.4392	← 265°	435.0	501.0	38000.0	Level	FlightAware ADS-B (PKC / UHPP)
Sun 04:44:13 PM	53.2244	159.3376	← 265°	436.0	502.0	38000.0	Level	FlightAware ADS-B (PKC / UHPP)
Sun 04:44:43 PM	53.2186	159.2365	← 265°	436.0	502.0	38000.0	Level	FlightAware ADS-B (PKC / UHPP)
Sun 04:45:13 PM	53.2126	159.1353	← 264°	437.0	503.0	38000.0	Level	FlightAware ADS-B (PKC / UHPP)
Sun 04:45:43 PM	53.2068	159.0373	← 264°	439.0	505.0	38000.0	Level	FlightAware ADS-B (PKC / UHPP)
Sun 04:46:13 PM	53.2006	158.9355	← 264°	440.0	506.0	38000.0	Level	FlightAware ADS-B (PKC / UHPP)
Sun 04:46:43 PM	53.1944	158.8335	← 264°	441.0	507.0	38000.0	Level	FlightAware ADS-B (PKC / UHPP)
Sun 04:47:13 PM	53.1881	158.7318	← 264°	443.0	510.0	38000.0	Level	FlightAware ADS-B (PKC / UHPP)
Sun 04:48:01 PM	53.1776	158.5667	← 264°	444.0	511.0	38000.0	Level	FlightAware ADS-B (PKC / UHPP)
Sun 04:48:42 PM	53.1664	158.4306	← 258°	438.0	504.0	38000.0	Level	FlightAware ADS-B (PKC / UHPP)
Sun 04:49:23 PM	53.146	158.296	← 256°	438.0	504.0	38000.0	Level	FlightAware ADS-B (PKC / UHPP)
Sun 04:49:53 PM	53.1314	158.2002	← 256°	438.0	504.0	38000.0	Level	FlightAware ADS-B (PKC / UHPP)
Sun 04:50:53 PM	53.1017	158.0064	← 256°	435.0	501.0	38000.0	15 Climbing	FlightAware ADS-B (PKC / UHPP)
Sun 04:51:33 PM	53.0815	157.8773	← 255°	433.0	498.0	38025.0	15 Climbing	FlightAware ADS-B (PKC / UHPP)
Sun 04:52:31 PM	53.0528	157.6952	← 255°	434.0	499.0	38025.0	-14 Descending	FlightAware ADS-B (PKC / UHPP)
Sun 04:53:23 PM	53.0258	157.5253	← 255°	437.0	503.0	38000.0	-1 Descending	FlightAware ADS-B (PKC / UHPP)
Sun 05:41:27 PM	53.4275	147.8016	← 273°	442.0	509.0	38000.0	Level	FlightAware ADS-B (INN / LOWI)
Sun 05:42:46 PM	53.4371	147.5283	← 273°	446.0	513.0	38000.0	Level	FlightAware ADS-B (INN / LOWI)
Sun 05:43:17 PM	53.4407	147.4256	← 273°	445.0	512.0	38000.0	Level	FlightAware ADS-B (INN / LOWI)
Sun 05:43:47 PM	53.4441	147.321	← 273°	443.0	510.0	38000.0	Level	FlightAware ADS-B (INN / LOWI)
Sun 05:44:46 PM	53.4503	147.119	← 273°	437.0	503.0	38000.0	Level	FlightAware ADS-B (INN / LOWI)
Sun 05:45:16 PM	53.4534	147.018	← 273°	438.0	504.0	38000.0	Level	FlightAware ADS-B (INN / LOWI)
Sun 05:45:47 PM	53.4564	146.9173	← 273°	438.0	504.0	38000.0	Level	FlightAware ADS-B (INN / LOWI)
Sun 05:46:17 PM	53.4597	146.8134	← 273°	439.0	505.0	38000.0	Level	FlightAware ADS-B (INN / LOWI)
Sun 05:46:47 PM	53.4629	146.7108	← 273°	438.0	504.0	38000.0	Level	FlightAware ADS-B (INN / LOWI)
Sun 05:47:17 PM	53.4659	146.6108	← 273°	437.0	503.0	38000.0	Level	FlightAware ADS-B (INN / LOWI)
Sun 05:47:47 PM	53.4685	146.5132	← 273°	434.0	499.0	38000.0	Level	FlightAware ADS-B (INN / LOWI)
Sun 05:48:17 PM	53.4714	146.41	← 273°	433.0	498.0	38000.0	Level	FlightAware ADS-B (INN / LOWI)
Sun 05:48:47 PM	53.4742	146.3082	← 273°	432.0	497.0	38000.0	-25 Descending	FlightAware ADS-B (INN / LOWI)
Sun 05:49:17 PM	53.4768	146.2092	← 273°	431.0	496.0	37975.0	Level	FlightAware ADS-B (INN / LOWI)
Sun 05:49:47 PM	53.4793	146.1091	← 273°	429.0	494.0	38000.0	25 Climbing	FlightAware ADS-B (INN / LOWI)
Sun 05:50:17 PM	53.4819	146.0089	← 272°	427.0	491.0	38000.0	Level	FlightAware ADS-B (INN / LOWI)
Sun 05:50:47 PM	53.4841	145.9111	← 272°	425.0	489.0	38000.0	Level	FlightAware ADS-B (INN / LOWI)
Sun 05:51:17 PM	53.4863	145.8108	← 272°	425.0	489.0	38000.0	Level	FlightAware ADS-B (INN / LOWI)
Sun 05:51:47 PM	53.4886	145.7125	← 272°	425.0	489.0	38000.0	Level	FlightAware ADS-B (INN / LOWI)
Sun 05:52:17 PM	53.4907	145.6142	← 272°	426.0	490.0	38000.0	Level	FlightAware ADS-B (INN / LOWI)
Sun 05:52:47 PM	53.4928	145.5151	← 272°	426.0	490.0	38000.0	Level	FlightAware ADS-B (INN / LOWI)
Sun 05:53:17 PM	53.4948	145.4161	← 272°	425.0	489.0	38000.0	Level	FlightAware ADS-B (INN / LOWI)
Sun 05:53:47 PM	53.4967	145.3177	← 272°	426.0	490.0	38000.0	Level	FlightAware ADS-B (INN / LOWI)
Sun 05:54:18 PM	53.4985	145.2176	← 272°	428.0	493.0	38000.0	Level	FlightAware ADS-B (INN / LOWI)
Sun 05:54:48 PM	53.5002	145.1187	← 272°	432.0	497.0	38000.0	Level	FlightAware ADS-B (INN / LOWI)
Sun 05:55:47 PM	53.5035	144.9175	← 272°	431.0	496.0	38000.0	Level	FlightAware ADS-B (INN / LOWI)
Sun 05:56:18 PM	53.5051	144.8172	← 272°	431.0	496.0	38000.0	Level	FlightAware ADS-B (INN / LOWI)
Sun 05:56:48 PM	53.5065	144.7158	← 271°	430.0	495.0	38000.0	Level	FlightAware ADS-B (INN / LOWI)
Sun 05:57:18 PM	53.5078	144.6172	← 271°	429.0	494.0	38000.0	Level	FlightAware ADS-B (INN / LOWI)
Sun 05:57:48 PM	53.5091	144.5167	← 271°	429.0	494.0	38000.0	Level	FlightAware ADS-B (INN / LOWI)
Sun 05:58:18 PM	53.5103	144.4176	← 271°	429.0	494.0	38000.0	Level	FlightAware ADS-B (INN / LOWI)
Sun 05:58:48 PM	53.5113	144.3185	← 271°	428.0	493.0	38000.0	Level	FlightAware ADS-B (INN / LOWI)
Sun 05:59:48 PM	53.5131	144.1201	← 271°	424.0	488.0	38000.0	Level	FlightAware ADS-B (INN / LOWI)
Sun 06:00:18 PM	53.514	144.0215	← 271°	423.0	487.0	38000.0	Level	FlightAware ADS-B (INN / LOWI)
Sun 06:00:48 PM	53.5147	143.9231	← 271°	422.0	486.0	38000.0	Level	FlightAware ADS-B (INN / LOWI)
Sun 06:01:18 PM	53.5154	143.8262	← 271°	421.0	484.0	38000.0	Level	FlightAware ADS-B (INN / LOWI)
Sun 06:01:48 PM	53.5159	143.7282	← 270°	420.0	483.0	38000.0	Level	FlightAware ADS-B (INN / LOWI)
Sun 06:02:18 PM	53.5164	143.6294	← 270°	418.0	481.0	38000.0	Level	FlightAware ADS-B (INN / LOWI)
Sun 06:02:48 PM	53.5168	143.5321	← 271°	418.0	481.0	38000.0	Level	FlightAware ADS-B (INN / LOWI)
Sun 06:03:18 PM	53.5172	143.4352	← 270°	419.0	482.0	38000.0	Level	FlightAware ADS-B (INN / LOWI)
Sun 06:03:48 PM	53.5175	143.3382	← 270°	420.0	483.0	38000.0	Level	FlightAware ADS-B (INN / LOWI)
Sun 06:04:48 PM	53.5176	143.143	← 270°	420.0	483.0	38000.0	Level	FlightAware ADS-B (INN / LOWI)
Sun 06:05:18 PM	53.5176	143.046	← 270°	420.0	483.0	38000.0	Level	FlightAware ADS-B (INN / LOWI)
Sun 06:05:56 PM	53.5158	142.9229	← 265°	423.0	487.0	38000.0	Level	FlightAware ADS-B (INN / LOWI)
Sun 06:06:27 PM	53.5072	142.8241	← 258°	427.0	491.0	38000.0	Level	FlightAware ADS-B (INN / LOWI)
Sun 06:07:07 PM	53.4872	142.6941	← 255°	428.0	493.0	38000.0	Level	FlightAware ADS-B (INN / LOWI)
Sun 06:07:37 PM	53.472	142.597	← 255°	429.0	494.0	38000.0	Level	FlightAware ADS-B (INN / LOWI)
Sun 06:08:07 PM	53.4566	142.4991	← 255°	429.0	494.0	38000.0	Level	FlightAware ADS-B (INN / LOWI)
Sun 06:08:37 PM	53.4415	142.4045	← 255°	431.0	496.0	38000.0	Level	FlightAware ADS-B (INN / LOWI)
Sun 06:09:07 PM	53.4264	142.3101	← 255°	433.0	498.0	38000.0	Level	FlightAware ADS-B (INN / LOWI)
Sun 06:09:38 PM	53.4104	142.2105	← 255°	433.0	498.0	38000.0	Level	FlightAware ADS-B (INN / LOWI)
Sun 06:10:08 PM	53.3944	142.1118	← 255°	433.0	498.0	38000.0	Level	FlightAware ADS-B (INN / LOWI)
Sun 06:10:38 PM	53.3784	142.0148	← 255°	434.0	499.0	38000.0	17 Climbing	FlightAware ADS-B (INN / LOWI)
Sun 06:11:38 PM	53.3464	141.8211	← 254°	432.0	497.0	38025.0	Level	FlightAware ADS-B (INN / LOWI)
Sun 06:12:08 PM	53.3305	141.7256	← 254°	430.0	495.0	38000.0	-25 Descending	FlightAware ADS-B (INN / LOWI)
Sun 06:12:38 PM	53.3146	141.6302	← 254°	429.0	494.0	38000.0	Level	FlightAware ADS-B (INN / LOWI)
Sun 06:13:08 PM	53.2985	141.5346	← 254°	428.0	493.0	38000.0	Level	FlightAware ADS-B (INN / LOWI)
Sun 06:13:38 PM	53.2822	141.4377	← 254°	429.0	494.0	38000.0	Level	FlightAware ADS-B (INN / LOWI)
Sun 06:14:08 PM	53.2661	141.3427	← 254°	430.0	495.0	38000.0	Level	FlightAware ADS-B (INN / LOWI)
Sun 06:14:38 PM	53.2498	141.2472	← 254°	429.0	494.0	38000.0	Level	FlightAware ADS-B (INN / LOWI)
Sun 06:15:08 PM	53.2335	141.152	← 254°	428.0	493.0	38000.0	Level	FlightAware ADS-B (INN / LOWI)
Sun 06:15:38 PM	53.2171	141.0583	← 254°	427.0	491.0	38000.0	Level	FlightAware ADS-B (INN / LOWI)
Sun 06:16:08 PM	53.2005	140.9629	← 254°	427.0	491.0	38000.0	Level	FlightAware ADS-B (INN / LOWI)
Sun 06:16:38 PM	53.184	140.8679	← 254°	429.0	494.0	38000.0	Level	FlightAware ADS-B (INN / LOWI)
Sun 06:17:13 PM	53.1663	140.7567	← 258°	427.0	491.0	38000.0	Level	FlightAware ADS-B (INN / LOWI)
Sun 06:17:43 PM	53.1581	140.6597	← 265°	424.0	488.0	38000.0	Level	FlightAware ADS-B (INN / LOWI)
Sun 06:18:13 PM	53.1565	140.5624	← 272°	420.0	483.0	38000.0	Level	FlightAware ADS-B (INN / LOWI)
Sun 06:18:43 PM	53.1594	140.4656	← 273°	421.0	484.0	38000.0	Level	FlightAware ADS-B (INN / LOWI)
Sun 06:19:14 PM	53.1619	140.3678	← 273°	420.0	483.0	38000.0	Level	FlightAware ADS-B (INN / LOWI)
Sun 06:20:14 PM	53.167	140.1738	← 273°	422.0	486.0	38000.0	Level	FlightAware ADS-B (INN / LOWI)
Sun 06:20:44 PM	53.1695	140.0765	← 272°	421.0	484.0	38000.0	Level	FlightAware ADS-B (INN / LOWI)
Sun 06:21:14 PM	53.1718	139.9825	← 272°	421.0	484.0	38000.0	Level	FlightAware ADS-B (INN / LOWI)
Sun 06:21:44 PM	53.1742	139.8837	← 273°	420.0	483.0	38000.0	Level	FlightAware ADS-B (INN / LOWI)
Sun 06:22:14 PM	53.1763	139.7861	← 272°	419.0	482.0	38000.0	Level	FlightAware ADS-B (INN / LOWI)
Sun 06:22:44 PM	53.1785	139.6891	← 272°	420.0	483.0	38000.0	Level	FlightAware ADS-B (INN / LOWI)
Sun 06:23:14 PM	53.1807	139.5914	← 272°	420.0	483.0	38000.0	Level	FlightAware ADS-B (INN / LOWI)
Sun 06:23:44 PM	53.1829	139.4945	← 272°	420.0	483.0	38000.0	Level	FlightAware ADS-B (INN / LOWI)
Sun 06:24:14 PM	53.1848	139.3944	← 272°	422.0	486.0	38000.0	Level	FlightAware ADS-B (KXK / UHKK)
Sun 06:24:55 PM	53.1872	139.2642	← 272°	423.0	487.0	38000.0	Level	FlightAware ADS-B (INN / LOWI)
Sun 06:25:25 PM	53.1889	139.1664	← 272°	423.0	487.0	38000.0	Level	FlightAware ADS-B (INN / LOWI)
Sun 06:25:55 PM	53.1905	139.0706	← 272°	424.0	488.0	38000.0	Level	FlightAware ADS-B (INN / LOWI)
Sun 06:26:25 PM	53.1922	138.9703	← 272°	426.0	490.0	38000.0	Level	FlightAware ADS-B (INN / LOWI)
Sun 06:26:56 PM	53.1937	138.8726	← 272°	426.0	490.0	38000.0	Level	FlightAware ADS-B (INN / LOWI)
Sun 06:27:37 PM	53.1957	138.7339	← 271°	424.0	488.0	38000.0	Level	FlightAware ADS-B (KXK / UHKK)
Sun 06:28:07 PM	53.1971	138.6359	← 271°	424.0	488.0	38000.0	22 Climbing	FlightAware ADS-B (KXK / UHKK)
Sun 06:28:46 PM	53.1987	138.5104	← 271°	423.0	487.0	38025.0	Level	FlightAware ADS-B (INN / LOWI)
Sun 06:29:37 PM	53.2006	138.3423	← 271°	423.0	487.0	38000.0	-19 Descending	FlightAware ADS-B (KXK / UHKK)
Sun 06:30:07 PM	53.2016	138.2448	← 271°	421.0	484.0	38000.0	Level	FlightAware ADS-B (KXK / UHKK)
Sun 06:30:57 PM	53.203	138.0842	← 271°	420.0	483.0	38000.0	Level	FlightAware ADS-B (KXK / UHKK)
Sun 06:31:28 PM	53.2038	137.9851	← 271°	420.0	483.0	38000.0	Level	FlightAware ADS-B (KXK / UHKK)
Sun 06:32:28 PM	53.2052	137.7897	← 271°	422.0	486.0	38000.0	Level	FlightAware ADS-B (KXK / UHKK)
Sun 06:32:58 PM	53.2057	137.692	← 270°	423.0	487.0	38000.0	Level	FlightAware ADS-B (KXK / UHKK)
Sun 06:33:28 PM	53.2061	137.5947	← 270°	425.0	489.0	38000.0	Level	FlightAware ADS-B (KXK / UHKK)
Sun 06:33:58 PM	53.2065	137.4956	← 270°	426.0	490.0	38000.0	Level	FlightAware ADS-B (KXK / UHKK)
Sun 06:34:28 PM	53.2068	137.398	← 270°	426.0	490.0	38000.0	Level	FlightAware ADS-B (KXK / UHKK)
Sun 06:35:04 PM	53.2057	137.2798	← 266°	428.0	493.0	38000.0	Level	FlightAware ADS-B (KXK / UHKK)
Sun 06:36:12 PM	53.1799	137.0614	← 251°	434.0	499.0	38000.0	Level	FlightAware ADS-B (KXK / UHKK)
Sun 06:36:45 PM	53.1551	136.957	↙ 245°	435.0	501.0	38000.0	Level	FlightAware ADS-B (KXK / UHKK)
Sun 06:37:16 PM	53.126	136.8657	↙ 239°	437.0	503.0	38000.0	Level	FlightAware ADS-B (KXK / UHKK)
Sun 06:37:47 PM	53.0905	136.7795	↙ 233°	439.0	505.0	38000.0	Level	FlightAware ADS-B (KXK / UHKK)
Sun 06:38:17 PM	53.0506	136.7028	↙ 226°	441.0	507.0	38000.0	Level	FlightAware ADS-B (KXK / UHKK)
Sun 06:38:48 PM	53.0052	136.6331	↙ 220°	444.0	511.0	38000.0	Level	FlightAware ADS-B (KXK / UHKK)
Sun 06:39:18 PM	52.9542	136.5699	↙ 215°	448.0	516.0	38000.0	Level	FlightAware ADS-B (KXK / UHKK)
Sun 06:39:48 PM	52.9036	136.5099	↙ 216°	449.0	517.0	38000.0	Level	FlightAware ADS-B (KXK / UHKK)
Sun 06:40:18 PM	52.8547	136.4519	↙ 216°	449.0	517.0	38000.0	Level	FlightAware ADS-B (KXK / UHKK)
Sun 06:40:49 PM	52.8023	136.3902	↙ 216°	447.0	514.0	38000.0	Level	FlightAware ADS-B (KXK / UHKK)
Sun 06:41:19 PM	52.7525	136.3316	↙ 215°	447.0	514.0	38000.0	Level	FlightAware ADS-B (KXK / UHKK)
Sun 06:41:49 PM	52.702	136.2724	↙ 215°	446.0	513.0	38000.0	Level	FlightAware ADS-B (KXK / UHKK)
Sun 06:42:30 PM	52.6337	136.1927	↙ 215°	445.0	512.0	38000.0	Level	FlightAware ADS-B (KXK / UHKK)
Sun 06:43:01 PM	52.5823	136.1329	↙ 215°	445.0	512.0	38000.0	Level	FlightAware ADS-B (KXK / UHKK)
Sun 06:43:31 PM	52.5327	136.0754	↙ 215°	443.0	510.0	38000.0	Level	FlightAware ADS-B (KXK / UHKK)
Sun 06:44:09 PM	52.4686	136.0014	↙ 215°	442.0	509.0	38000.0	Level	FlightAware ADS-B (KXK / UHKK)
Sun 06:44:39 PM	52.419	135.9445	↙ 215°	441.0	507.0	38000.0	Level	FlightAware ADS-B (KXK / UHKK)
Sun 06:45:19 PM	52.3512	135.8665	↙ 215°	441.0	507.0	38000.0	Level	FlightAware ADS-B (KXK / UHKK)
Sun 06:46:00 PM	52.2835	135.789	↙ 215°	439.0	505.0	38000.0	Level	FlightAware ADS-B (KXK / UHKK)
Sun 06:46:35 PM	52.2264	135.724	↙ 215°	439.0	505.0	38000.0	Level	FlightAware ADS-B (KXK / UHKK)
Sun 06:47:19 PM	52.1507	135.638	↙ 215°	439.0	505.0	38000.0	Level	FlightAware ADS-B (KXK / UHKK)
Sun 06:47:49 PM	52.1015	135.5823	↙ 215°	439.0	505.0	38000.0	Level	FlightAware ADS-B (KXK / UHKK)
Sun 06:48:19 PM	52.0513	135.5258	↙ 215°	439.0	505.0	38000.0	Level	FlightAware ADS-B (KXK / UHKK)
Sun 06:48:49 PM	52.001	135.4691	↙ 215°	438.0	504.0	38000.0	Level	FlightAware ADS-B (KXK / UHKK)
Sun 06:49:19 PM	51.9518	135.414	↙ 215°	436.0	502.0	38000.0	Level	FlightAware ADS-B (KXK / UHKK)
Sun 06:49:49 PM	51.9014	135.3575	↙ 215°	435.0	501.0	38000.0	Level	FlightAware ADS-B (KXK / UHKK)
Sun 06:50:31 PM	51.8346	135.2831	↙ 215°	433.0	498.0	38000.0	Level	FlightAware ADS-B (KXK / UHKK)
Sun 06:51:01 PM	51.7852	135.2282	↙ 215°	432.0	497.0	38000.0	Level	FlightAware ADS-B (KXK / UHKK)
Sun 06:51:31 PM	51.7351	135.1727	↙ 214°	432.0	497.0	38000.0	Level	FlightAware ADS-B (KXK / UHKK)
Sun 06:52:01 PM	51.687	135.1196	↙ 215°	433.0	498.0	38000.0	Level	FlightAware ADS-B (KXK / UHKK)
Sun 06:52:31 PM	51.6366	135.064	↙ 214°	435.0	501.0	38000.0	Level	FlightAware ADS-B (KXK / UHKK)
Sun 06:53:21 PM	51.5543	134.9735	↙ 214°	438.0	504.0	38000.0	Level	FlightAware ADS-B (KXK / UHKK)
Sun 06:53:51 PM	51.504	134.9185	↙ 214°	438.0	504.0	38000.0	Level	FlightAware ADS-B (KXK / UHKK)
Sun 06:54:21 PM	51.4541	134.864	↙ 214°	438.0	504.0	38000.0	Level	FlightAware ADS-B (KXK / UHKK)
Sun 06:54:51 PM	51.4041	134.8095	↙ 214°	441.0	507.0	38000.0	Level	FlightAware ADS-B (KXK / UHKK)
Sun 06:55:21 PM	51.3532	134.7542	↙ 214°	440.0	506.0	38000.0	Level	FlightAware ADS-B (KXK / UHKK)
Sun 06:55:51 PM	51.3029	134.6997	↙ 214°	441.0	507.0	38000.0	Level	FlightAware ADS-B (KXK / UHKK)
Sun 06:56:37 PM	51.2251	134.6158	↙ 214°	442.0	509.0	38000.0	Level	FlightAware ADS-B (KXK / UHKK)
Sun 06:57:07 PM	51.1744	134.5612	↙ 214°	442.0	509.0	38000.0	Level	FlightAware ADS-B (KXK / UHKK)
Sun 06:57:37 PM	51.1228	134.5061	↙ 214°	441.0	507.0	38000.0	Level	FlightAware ADS-B (KXK / UHKK)
Sun 06:58:07 PM	51.0732	134.453	↙ 214°	441.0	507.0	38000.0	Level	FlightAware ADS-B (KXK / UHKK)
Sun 06:58:40 PM	51.0181	134.3943	↙ 214°	440.0	506.0	38000.0	82 Climbing	FlightAware ADS-B (KXK / UHKK)
Sun 06:59:20 PM	50.9497	134.3218	↙ 214°	441.0	507.0	38100.0	86 Climbing	FlightAware ADS-B (KXK / UHKK)
Sun 06:59:50 PM	50.8989	134.2681	↙ 214°	443.0	510.0	38100.0	25 Climbing	FlightAware ADS-B (KXK / UHKK)
Sun 07:00:20 PM	50.8476	134.2139	↙ 214°	441.0	507.0	38125.0	Level	FlightAware ADS-B (KXK / UHKK)
Sun 07:00:50 PM	50.7969	134.1608	↙ 214°	441.0	507.0	38100.0	-25 Descending	FlightAware ADS-B (KXK / UHKK)
Sun 07:01:20 PM	50.7456	134.1066	↙ 214°	442.0	509.0	38100.0	Level	FlightAware ADS-B (KXK / UHKK)
Sun 07:01:50 PM	50.6943	134.0528	↙ 213°	441.0	507.0	38100.0	Level	FlightAware ADS-B (KXK / UHKK)
Sun 07:02:20 PM	50.6439	134.0004	↙ 213°	441.0	507.0	38100.0	Level	FlightAware ADS-B (KXK / UHKK)
Sun 07:02:50 PM	50.5928	133.9473	↙ 213°	441.0	507.0	38100.0	Level	FlightAware ADS-B (KXK / UHKK)
Sun 07:03:21 PM	50.5405	133.893	↙ 214°	443.0	510.0	38100.0	Level	FlightAware ADS-B (KXK / UHKK)
Sun 07:03:52 PM	50.488	133.8386	↙ 213°	445.0	512.0	38100.0	Level	FlightAware ADS-B (KXK / UHKK)
Sun 07:04:46 PM	50.3953	133.7425	↙ 213°	445.0	512.0	38100.0	Level	FlightAware ADS-B (KXK / UHKK)
Sun 07:05:16 PM	50.3453	133.6912	↙ 213°	446.0	513.0	38100.0	Level	FlightAware ADS-B (KXK / UHKK)
Sun 07:05:52 PM	50.2814	133.6258	↙ 213°	447.0	514.0	38100.0	Level	FlightAware ADS-B (KXK / UHKK)
Sun 07:06:22 PM	50.2298	133.5732	↙ 213°	448.0	516.0	38100.0	Level	FlightAware ADS-B (KXK / UHKK)
Sun 07:06:52 PM	50.1783	133.5208	↙ 213°	449.0	517.0	38100.0	Level	FlightAware ADS-B (KXK / UHKK)
Sun 07:07:22 PM	50.1249	133.4667	↙ 213°	450.0	518.0	38100.0	Level	FlightAware ADS-B (KXK / UHKK)
Sun 07:07:52 PM	50.0725	133.4136	↙ 213°	451.0	519.0	38100.0	Level	FlightAware ADS-B (KXK / UHKK)
Sun 07:08:22 PM	50.0206	133.3611	↙ 213°	450.0	518.0	38100.0	Level	FlightAware ADS-B (KXK / UHKK)
Sun 07:08:53 PM	49.9682	133.3084	↙ 213°	450.0	518.0	38100.0	Level	FlightAware ADS-B (KXK / UHKK)
Sun 07:09:45 PM	49.8758	133.2161	↙ 213°	452.0	520.0	38100.0	Level	FlightAware ADS-B (KXK / UHKK)
Sun 07:10:15 PM	49.8208	133.1612	↙ 213°	454.0	522.0	38100.0	Level	FlightAware ADS-B (KXK / UHKK)
Sun 07:10:45 PM	49.769	133.1096	↙ 213°	453.0	521.0	38100.0	Level	FlightAware ADS-B (KHV / UHHH)
Sun 07:11:16 PM	49.7154	133.0564	↙ 213°	454.0	522.0	38100.0	Level	FlightAware ADS-B (KXK / UHKK)
Sun 07:11:52 PM	49.654	132.9956	↙ 213°	454.0	522.0	38100.0	Level	FlightAware ADS-B (KXK / UHKK)
Sun 07:12:22 PM	49.5999	132.9422	↙ 213°	454.0	522.0	38100.0	Level	FlightAware ADS-B (KXK / UHKK)
Sun 07:12:53 PM	49.545	132.8882	↙ 213°	453.0	521.0	38100.0	Level	FlightAware ADS-B (KXK / UHKK)
Sun 07:13:24 PM	49.4927	132.8368	↙ 213°	452.0	520.0	38100.0	Level	FlightAware ADS-B (KXK / UHKK)
Sun 07:14:24 PM	49.3863	132.7331	↙ 213°	452.0	520.0	38100.0	Level	FlightAware ADS-B (KXK / UHKK)
Sun 07:14:59 PM	49.3217	132.6703	↙ 213°	452.0	520.0	38100.0	Level	FlightAware ADS-B (KHV / UHHH)
Sun 07:15:54 PM	49.2275	132.5788	↙ 212°	451.0	519.0	38100.0	Level	FlightAware ADS-B (KXK / UHKK)
Sun 07:16:24 PM	49.1728	132.5258	↙ 212°	451.0	519.0	38100.0	Level	FlightAware ADS-B (KXK / UHKK)
Sun 07:17:15 PM	49.0845	132.4408	↙ 212°	448.0	516.0	38100.0	Level	FlightAware ADS-B (KXK / UHKK)
Sun 07:17:54 PM	49.0149	132.3741	↙ 212°	445.0	512.0	38100.0	Level	FlightAware ADS-B (KXK / UHKK)
Sun 07:18:24 PM	48.963	132.3245	↙ 212°	445.0	512.0	38100.0	Level	FlightAware ADS-B (KXK / UHKK)
Sun 07:18:55 PM	48.911	132.2752	↙ 212°	445.0	512.0	38100.0	Level	FlightAware ADS-B (KXK / UHKK)
Sun 07:19:25 PM	48.8586	132.2255	↙ 212°	445.0	512.0	38100.0	Level	FlightAware ADS-B (KXK / UHKK)
Sun 07:20:12 PM	48.7761	132.1475	↙ 212°	446.0	513.0	38100.0	Level	FlightAware ADS-B (KXK / UHKK)
Sun 07:20:55 PM	48.7015	132.0772	↙ 212°	447.0	514.0	38100.0	Level	FlightAware ADS-B (KXK / UHKK)
Sun 07:22:32 PM	48.5304	131.9167	↙ 212°	450.0	518.0	38100.0	-46 Descending	FlightAware ADS-B (KXK / UHKK)
Sun 08:56:07 PM	41.9466	119.43	↙ 230°	374.0	430.0	33725.0	Level	FlightAware ADS-B (NAY / ZBNY)
Sun 08:56:31 PM	41.9197	119.3845	↙ 232°	399.0	459.0	33275.0	-1,042 Descending	FlightAware ADS-B (NAY / ZBNY)
Sun 08:57:06 PM	41.8807	119.318	↙ 232°	405.0	466.0	32700.000000000004	-969 Descending	FlightAware ADS-B (NAY / ZBNY)
Sun 08:57:36 PM	41.8462	119.259	↙ 232°	399.0	459.0	32225.0	-444 Descending	FlightAware ADS-B (NAY / ZBNY)
Sun 08:58:27 PM	41.7878	119.1599	↙ 232°	397.0	457.0	32100.0	-111 Descending	FlightAware ADS-B (NAY / ZBNY)
Sun 08:58:57 PM	41.7542	119.1028	↙ 232°	400.0	460.0	32075.000000000004	Level	FlightAware ADS-B (NAY / ZBNY)
Sun 08:59:27 PM	41.7193	119.0442	↙ 232°	394.0	453.0	32100.0	25 Climbing	FlightAware ADS-B (NAY / ZBNY)
Sun 08:59:57 PM	41.685	118.9863	↙ 232°	395.0	455.0	32100.0	-25 Descending	FlightAware ADS-B (NAY / ZBNY)
Sun 09:00:27 PM	41.6513	118.9292	↙ 232°	405.0	466.0	32075.000000000004	Level	FlightAware ADS-B (NAY / ZBNY)
Sun 09:01:09 PM	41.6022	118.8465	↙ 232°	409.0	471.0	32100.0	21 Climbing	FlightAware ADS-B (NAY / ZBNY)
Sun 09:01:39 PM	41.5663	118.7863	↙ 231°	409.0	471.0	32100.0	Level	FlightAware ADS-B (NAY / ZBNY)
Sun 09:02:10 PM	41.5306	118.7268	↙ 232°	408.0	470.0	32100.0	Level	FlightAware ADS-B (NAY / ZBNY)
Sun 09:03:09 PM	41.4613	118.611	↙ 232°	410.0	472.0	32100.0	-317 Descending	FlightAware ADS-B (NAY / ZBNY)
Sun 09:03:40 PM	41.4275	118.5456	↙ 239°	404.0	465.0	31625.0	-959 Descending	FlightAware ADS-B (NAY / ZBNY)
Sun 09:04:10 PM	41.4023	118.4796	← 246°	398.0	458.0	31125.0	-1,000 Descending	FlightAware ADS-B (NAY / ZBNY)
Sun 09:04:40 PM	41.3819	118.4116	← 249°	397.0	457.0	30625.0	-1,000 Descending	FlightAware ADS-B (NAY / ZBNY)
Sun 09:05:10 PM	41.3616	118.344	← 248°	395.0	455.0	30125.0	-1,025 Descending	FlightAware ADS-B (NAY / ZBNY)
Sun 09:05:40 PM	41.3409	118.2752	← 248°	396.0	456.0	29600.0	-1,500 Descending	FlightAware ADS-B (NAY / ZBNY)
Sun 09:06:10 PM	41.3207	118.209	← 248°	387.0	445.0	28625.0	-2,090 Descending	FlightAware ADS-B (NAY / ZBNY)
Sun 09:06:41 PM	41.301	118.1437	← 248°	380.0	437.0	27475.0	-2,311 Descending	FlightAware ADS-B (NAY / ZBNY)
Sun 09:07:11 PM	41.281	118.0779	← 248°	374.0	430.0	26275.0	-2,450 Descending	FlightAware ADS-B (NAY / ZBNY)
Sun 09:07:41 PM	41.2619	118.015	← 248°	372.0	428.0	25025.0	-2,700 Descending	FlightAware ADS-B (NAY / ZBNY)
Sun 09:08:11 PM	41.2426	117.9515	← 248°	377.0	434.0	23575.0	-2,400 Descending	FlightAware ADS-B (NAY / ZBNY)
Sun 09:08:41 PM	41.2229	117.8865	← 248°	373.0	429.0	22625.0	-1,850 Descending	FlightAware ADS-B (NAY / ZBNY)
Sun 09:09:11 PM	41.2037	117.8237	← 248°	368.0	423.0	21725.0	-1,800 Descending	FlightAware ADS-B (NAY / ZBNY)
Sun 09:09:41 PM	41.1844	117.7611	← 248°	362.0	417.0	20825.0	-1,800 Descending	FlightAware ADS-B (NAY / ZBNY)
Sun 09:10:11 PM	41.1655	117.6998	← 248°	358.0	412.0	19925.0	-1,800 Descending	FlightAware ADS-B (NAY / ZBNY)
Sun 09:10:41 PM	41.1465	117.6379	← 248°	362.0	417.0	19025.0	-1,800 Descending	FlightAware ADS-B (NAY / ZBNY)
Sun 09:11:11 PM	41.1276	117.5768	← 248°	360.0	414.0	18125.0	-1,869 Descending	FlightAware ADS-B (NAY / ZBNY)
Sun 09:11:42 PM	41.1084	117.515	← 248°	357.0	411.0	17125.0	-1,869 Descending	FlightAware ADS-B (NAY / ZBNY)
Sun 09:12:12 PM	41.0899	117.4556	← 248°	349.0	402.0	16225.000000000002	-2,115 Descending	FlightAware ADS-B (NAY / ZBNY)
Sun 09:12:43 PM	41.0705	117.3929	← 248°	353.0	406.0	14975.0	-1,944 Descending	FlightAware ADS-B (NAY / ZBNY)
Sun 09:13:23 PM	41.0459	117.3144	← 248°	344.0	396.0	13925.0	-881 Descending	FlightAware ADS-B (NAY / ZBNY)
Sun 09:14:03 PM	41.0221	117.2378	← 248°	340.0	391.0	13800.0	-103 Descending	FlightAware ADS-B (NAY / ZBNY)
Sun 09:14:36 PM	40.9997	117.1748	↙ 234°	351.0	404.0	13800.0	28 Climbing	FlightAware ADS-B (NAY / ZBNY)
Sun 09:14:56 PM	40.9744	117.1476	↙ 208°	372.0	428.0	13825.0	Level	FlightAware ADS-B (NAY / ZBNY)
Sun 09:15:26 PM	40.9278	117.1161	↙ 208°	373.0	429.0	13800.0	-25 Descending	FlightAware ADS-B (NAY / ZBNY)
Sun 09:15:56 PM	40.8824	117.0835	↙ 209°	371.0	427.0	13800.0	Level	FlightAware ADS-B (NAY / ZBNY)
Sun 09:16:27 PM	40.8369	117.0508	↙ 209°	370.0	426.0	13800.0	Level	FlightAware ADS-B (NAY / ZBNY)
Sun 09:16:57 PM	40.7911	117.0181	↙ 209°	371.0	427.0	13800.0	Level	FlightAware ADS-B (NAY / ZBNY)
Sun 09:17:32 PM	40.7412	116.9779	↙ 224°	361.0	415.0	13800.0	-320 Descending	FlightAware ADS-B (NAY / ZBNY)
Sun 09:18:12 PM	40.7017	116.9077	↙ 234°	348.0	400.0	13400.0	-750 Descending	FlightAware ADS-B (NAY / ZBNY)
Sun 09:18:42 PM	40.6731	116.8574	↙ 233°	344.0	396.0	12925.0	-1,000 Descending	FlightAware ADS-B (NAY / ZBNY)
Sun 09:19:12 PM	40.6438	116.8076	↙ 227°	345.0	397.0	12400.0	-994 Descending	FlightAware ADS-B (NAY / ZBNY)
Sun 09:20:02 PM	40.5675	116.7698	↓ 194°	370.0	426.0	11600.0	-994 Descending	FlightAware ADS-B (PEK / ZBAA)
Sun 09:20:32 PM	40.5157	116.7521	↓ 195°	371.0	427.0	11075.0	-1,008 Descending	FlightAware ADS-B (NAY / ZBNY)
Sun 09:21:03 PM	40.466	116.7349	↓ 195°	369.0	425.0	10575.0	-934 Descending	FlightAware ADS-B (NAY / ZBNY)
Sun 09:21:33 PM	40.4171	116.718	↓ 195°	356.0	410.0	10125.0	-750 Descending	FlightAware ADS-B (NAY / ZBNY)
Sun 09:22:03 PM	40.3698	116.7018	↓ 195°	334.0	384.0	9825.0	-589 Descending	FlightAware ADS-B (PEK / ZBAA)
Sun 09:22:29 PM	40.3311	116.6899	↓ 187°	326.0	375.0	9575.0	-912 Descending	FlightAware ADS-B (PEK / ZBAA)
Sun 09:22:54 PM	40.2939	116.6939	↓ 172°	325.0	374.0	9050.0	-1,134 Descending	FlightAware ADS-B (PEK / ZBAA)
Sun 09:23:10 PM	40.2705	116.6981	↓ 172°	321.0	369.0	8800.0	-1,239 Descending	FlightAware ADS-B (NAY / ZBNY)
Sun 09:23:40 PM	40.2257	116.7056	↓ 173°	322.0	371.0	8100.0	-1,200 Descending	FlightAware ADS-B (NAY / ZBNY)
Sun 09:24:10 PM	40.1821	116.7126	↓ 173°	319.0	367.0	7600.0	-1,125 Descending	FlightAware ADS-B (NAY / ZBNY)
Sun 09:24:40 PM	40.1383	116.7197	↓ 173°	317.0	365.0	6975.0	-977 Descending	FlightAware ADS-B (NAY / ZBNY)
Sun 09:25:16 PM	40.0854	116.7282	↓ 173°	307.0	353.0	6525.0	-491 Descending	FlightAware ADS-B (PEK / ZBAA)
Sun 09:25:35 PM	40.058	116.7326	↓ 173°	289.0	333.0	6525.0	31 Climbing	FlightAware ADS-B (PEK / ZBAA)
Sun 09:26:05 PM	40.0207	116.7387	↓ 173°	263.0	303.0	6550.0	-98 Descending	FlightAware ADS-B (PEK / ZBAA)
Sun 09:26:21 PM	40.0034	116.7415	↓ 172°	260.0	299.0	6450.0	-587 Descending	FlightAware ADS-B (NAY / ZBNY)
Sun 09:26:51 PM	39.9688	116.7474	↓ 173°	253.0	291.0	6100.0	-861 Descending	FlightAware ADS-B (NAY / ZBNY)
Sun 09:27:22 PM	39.9329	116.7533	↓ 173°	242.0	278.0	5575.0	-1,290 Descending	FlightAware ADS-B (PEK / ZBAA)
Sun 09:27:41 PM	39.9115	116.7568	↓ 173°	247.0	284.0	5025.0	-1,208 Descending	FlightAware ADS-B (PEK / ZBAA)
Sun 09:27:58 PM	39.892	116.7601	↓ 173°	244.0	281.0	4850.0	-309 Descending	FlightAware ADS-B (PEK / ZBAA)
Sun 09:28:15 PM	39.8737	116.7631	↓ 173°	236.0	272.0	4850.0	-500 Descending	FlightAware ADS-B (PEK / ZBAA)
Sun 09:28:31 PM	39.8561	116.7661	↓ 173°	237.0	273.0	4575.0	-1,239 Descending	FlightAware ADS-B (PEK / ZBAA)
Sun 09:29:01 PM	39.8233	116.7715	↓ 173°	238.0	274.0	3900.0	-1,224 Descending	FlightAware ADS-B (NAY / ZBNY)
Sun 09:29:20 PM	39.8026	116.7737	↓ 185°	230.0	265.0	3575.0	-1,038 Descending	FlightAware ADS-B (NAY / ZBNY)
Sun 09:29:40 PM	39.7851	116.7615	↙ 231°	210.0	242.0	3225.0	-875 Descending	FlightAware ADS-B (NAY / ZBNY)
Sun 09:29:56 PM	39.7796	116.7434	← 258°	194.0	223.0	3050.0	-446 Descending	FlightAware ADS-B (PEK / ZBAA)
Sun 09:30:17 PM	39.7755	116.7205	← 257°	186.0	214.0	2950.0	-269 Descending	FlightAware ADS-B (NAY / ZBNY)
Sun 09:30:35 PM	39.7741	116.7015	← 282°	169.0	194.0	2875.0	-513 Descending	FlightAware ADS-B (PEK / ZBAA)
Sun 09:30:55 PM	39.7828	116.6868	↖ 322°	159.0	183.0	2625.0	-423 Descending	FlightAware ADS-B (NAY / ZBNY)
Sun 09:31:14 PM	39.7942	116.6757	↖ 324°	157.0	181.0	2600.0	-38 Descending	FlightAware ADS-B (NAY / ZBNY)
Sun 09:31:35 PM	39.8068	116.6638	↖ 324°	160.0	184.0	2600.0	Level	FlightAware ADS-B (PEK / ZBAA)
Sun 09:32:15 PM	39.8308	116.6411	↖ 324°	157.0	181.0	2600.0	Level	FlightAware ADS-B (PEK / ZBAA)
Sun 09:32:33 PM	39.8411	116.6313	↖ 324°	157.0	181.0	2600.0	-39 Descending	FlightAware ADS-B (NAY / ZBNY)
Sun 09:32:53 PM	39.8528	116.6202	↖ 324°	157.0	181.0	2575.0	Level	FlightAware ADS-B (NAY / ZBNY)
Sun 09:33:12 PM	39.8651	116.6106	↖ 337°	161.0	185.0	2600.0	32 Climbing	FlightAware ADS-B (PEK / ZBAA)
Sun 09:33:40 PM	39.8851	116.604	↑ 351°	161.0	185.0	2600.0	31 Climbing	FlightAware ADS-B (PEK / ZBAA)
Sun 09:34:00 PM	39.8994	116.6014	↑ 353°	155.0	178.0	2625.0	Level	FlightAware ADS-B (PEK / ZBAA)
Sun 09:34:32 PM	39.9213	116.5981	↑ 353°	153.0	176.0	2600.0	-63 Descending	FlightAware ADS-B (NAY / ZBNY)
Sun 09:34:48 PM	39.9325	116.5963	↑ 353°	153.0	176.0	2575.0	-554 Descending	FlightAware ADS-B (PEK / ZBAA)
Sun 09:35:18 PM	39.9555	116.5927	↑ 353°	153.0	176.0	2175.0	-813 Descending	FlightAware ADS-B (PEK / ZBAA)
Sun 09:35:36 PM	39.967	116.5909	↑ 353°	147.0	169.0	1925.0	-813 Descending	FlightAware ADS-B (PEK / ZBAA)
Sun 09:36:06 PM	39.987	116.5877	↑ 354°	132.0	152.0	1525.0	-734 Descending	FlightAware ADS-B (PEK / ZBAA)
Sun 09:36:23 PM	39.9961	116.5864	↑ 353°	121.0	139.0	1350.0	-679 Descending	FlightAware ADS-B (NAY / ZBNY)
Sun 09:36:48 PM	40.0099	116.5842	↑ 353°	115.0	132.0	1050.0	-695 Descending	FlightAware ADS-B (PEK / ZBAA)
Sun 09:37:04 PM	40.0185	116.5827	↑ 353°	115.0	132.0	875.0	-682 Descending	FlightAware ADS-B (PEK / ZBAA)
Sun 09:37:21 PM	40.0271	116.5813	↑ 353°	115.0	132.0	675.0	-636 Descending	FlightAware ADS-B (PEK / ZBAA)
Sun 09:37:37 PM	40.036	116.5801	↑ 355°	115.0	132.0	525.0	-563 Descending	FlightAware ADS-B (PEK / ZBAA)
