# Supplementary material for: TrackMatcher – a tool for finding intercepts in tracks of geographical positions
Source: Copernicus journal article supplement (doi:10.5194/gmd-15-7557-2022), 2022-10-18
Supplement: Supplementary file 1 [file gmd-15-7557-2022-supplement.zip › ESM/example/data/flights/HAL852_27-JAN-2019_RJTT-PHKO.dat]

Time (CET)	Latitude	Longitude	Course	kts	mph	feet	Rate	Reporting Facility
Sun 04:56:05 PM	35.5496	139.8327	↗ 44°	146.0	168.0	850.0	Level	FlightAware ADS-B (HND / RJTT)
Sun 04:56:21 PM	35.558	139.8425	↗ 43°	158.0	182.0	1250.0	1,172 Climbing	FlightAware ADS-B (HND / RJTT)
Sun 04:56:37 PM	35.5662	139.8526	↗ 50°	173.0	199.0	1475.0	818 Climbing	FlightAware ADS-B (RJTF)
Sun 04:56:54 PM	35.5704	139.8688	→ 91°	184.0	212.0	1700.0	773 Climbing	FlightAware ADS-B (HND / RJTT)
Sun 04:57:10 PM	35.5647	139.8857	↘ 126°	192.0	221.0	1900.0	1,304 Climbing	FlightAware ADS-B (HND / RJTT)
Sun 04:57:40 PM	35.5466	139.9115	↘ 130°	205.0	236.0	2700.0	1,867 Climbing	FlightAware ADS-B (HND / RJTT)
Sun 04:57:59 PM	35.5352	139.9273	↘ 136°	216.0	249.0	3425.0	2,514 Climbing	FlightAware ADS-B (NRT / RJAA)
Sun 04:58:17 PM	35.5185	139.9372	↓ 171°	221.0	254.0	4250.0	2,125 Climbing	FlightAware ADS-B (NRT / RJAA)
Sun 04:58:35 PM	35.5003	139.9336	↙ 202°	240.0	276.0	4700.0	1,500 Climbing	FlightAware ADS-B
Sun 04:58:52 PM	35.4852	139.9188	↙ 228°	263.0	303.0	5125.0	2,182 Climbing	FlightAware ADS-B
Sun 04:59:08 PM	35.4724	139.898	↙ 236°	273.0	314.0	5900.0	3,516 Climbing	FlightAware ADS-B (HND / RJTT)
Sun 04:59:24 PM	35.4612	139.8784	↙ 234°	272.0	313.0	7000.0	2,786 Climbing	FlightAware ADS-B (HND / RJTT)
Sun 04:59:43 PM	35.4467	139.8553	↙ 232°	276.0	318.0	7525.0	3,406 Climbing	FlightAware ADS-B (NRT / RJAA)
Sun 05:00:12 PM	35.4235	139.8192	↙ 232°	286.0	329.0	9725.0	3,780 Climbing	FlightAware ADS-B (HND / RJTT)
Sun 05:00:33 PM	35.406	139.7914	↙ 234°	300.0	345.0	10675.0	2,013 Climbing	FlightAware ADS-B (NRT / RJAA)
Sun 05:00:50 PM	35.3914	139.7693	↙ 224°	330.0	380.0	11000.0	2,230 Climbing	FlightAware ADS-B (RJTF)
Sun 05:01:10 PM	35.3622	139.7497	↓ 192°	352.0	405.0	12050.0	3,039 Climbing	FlightAware ADS-B (OKO / RJTY)
Sun 05:01:28 PM	35.3328	139.7492	↓ 171°	360.0	414.0	12925.0	2,871 Climbing	FlightAware ADS-B (OKO / RJTY)
Sun 05:02:08 PM	35.2636	139.7756	↓ 163°	376.0	433.0	14825.0	2,764 Climbing	FlightAware ADS-B (RJTF)
Sun 05:02:38 PM	35.2164	139.7932	↓ 163°	394.0	453.0	16149.999999999998	2,600 Climbing	FlightAware ADS-B (NJA / RJTA)
Sun 05:03:08 PM	35.1635	139.8132	↓ 163°	405.0	466.0	17425.0	2,582 Climbing	FlightAware ADS-B (OKO / RJTY)
Sun 05:03:39 PM	35.1049	139.8354	↓ 163°	419.0	482.0	18775.0	2,565 Climbing	FlightAware ADS-B (OKO / RJTY)
Sun 05:04:10 PM	35.0498	139.8562	↓ 163°	428.0	493.0	20075.0	2,529 Climbing	FlightAware ADS-B (HND / RJTT)
Sun 05:04:30 PM	35.0102	139.8729	↓ 156°	439.0	505.0	20925.0	2,311 Climbing	FlightAware ADS-B (HND / RJTT)
Sun 05:04:47 PM	34.9819	139.8957	↘ 139°	453.0	521.0	21500.0	2,136 Climbing	FlightAware ADS-B (OIM / RJTO)
Sun 05:05:03 PM	34.9599	139.9272	↘ 123°	459.0	528.0	22100.0	2,156 Climbing	FlightAware ADS-B (NRT / RJAA)
Sun 05:05:19 PM	34.9451	139.9639	→ 108°	461.0	531.0	22650.0	1,671 Climbing	FlightAware ADS-B (HND / RJTT)
Sun 05:05:38 PM	34.9378	140.0129	→ 94°	460.0	529.0	23075.0	1,776 Climbing	FlightAware ADS-B (RJTF)
Sun 05:06:08 PM	34.9329	140.0925	→ 95°	470.0	541.0	24100.0	2,000 Climbing	FlightAware ADS-B (RJTF)
Sun 05:06:38 PM	34.9269	140.1724	→ 95°	476.0	548.0	25075.0	2,075 Climbing	FlightAware ADS-B (HND / RJTT)
Sun 05:07:08 PM	34.921	140.2527	→ 95°	482.0	555.0	26175.0	1,900 Climbing	FlightAware ADS-B (HND / RJTT)
Sun 05:07:38 PM	34.9151	140.3345	→ 95°	492.0	566.0	26975.0	1,650 Climbing	FlightAware ADS-B (HND / RJTT)
Sun 05:08:08 PM	34.9091	140.4169	→ 95°	502.0	578.0	27825.0	1,550 Climbing	FlightAware ADS-B (HND / RJTT)
Sun 05:08:38 PM	34.9026	140.5052	→ 95°	510.0	587.0	28525.0	1,775 Climbing	FlightAware ADS-B (IBR / RJAH)
Sun 05:09:08 PM	34.8964	140.5876	→ 95°	511.0	588.0	29600.0	1,875 Climbing	FlightAware ADS-B (HND / RJTT)
Sun 05:09:38 PM	34.8897	140.676	→ 95°	517.0	595.0	30400.0	1,300 Climbing	FlightAware ADS-B (NJA / RJTA)
Sun 05:10:08 PM	34.8834	140.76	→ 95°	528.0	608.0	30900.0	1,175 Climbing	FlightAware ADS-B (HND / RJTT)
Sun 05:10:38 PM	34.8765	140.8492	→ 95°	534.0	615.0	31575.0	1,205 Climbing	FlightAware ADS-B (HND / RJTT)
Sun 05:11:09 PM	34.8693	140.9407	→ 95°	542.0	624.0	32125.0	944 Climbing	FlightAware ADS-B (HND / RJTT)
Sun 05:11:40 PM	34.8618	141.0371	→ 96°	554.0	638.0	32549.999999999996	861 Climbing	FlightAware ADS-B (RJTC)
Sun 05:12:10 PM	34.8543	141.1318	→ 96°	562.0	647.0	33000.0	1,350 Climbing	FlightAware ADS-B (HND / RJTT)
Sun 05:12:40 PM	34.8465	141.2274	→ 96°	559.0	643.0	33900.0	1,500 Climbing	FlightAware ADS-B (RJTF)
Sun 05:13:11 PM	34.8385	141.3264	→ 96°	564.0	649.0	34525.0	1,303 Climbing	FlightAware ADS-B
Sun 05:13:41 PM	34.8308	141.4212	→ 96°	563.0	648.0	35225.0	1,721 Climbing	FlightAware ADS-B (OKO / RJTY)
Sun 05:14:12 PM	34.8227	141.5136	→ 98°	555.0	639.0	36275.0	1,559 Climbing	FlightAware ADS-B (NJA / RJTA)
Sun 05:14:32 PM	34.8105	141.5763	→ 108°	564.0	649.0	36550.0	750 Climbing	FlightAware ADS-B (HND / RJTT)
Sun 05:14:56 PM	34.7857	141.6455	↘ 119°	567.0	652.0	36825.0	867 Climbing	FlightAware ADS-B (NRT / RJAA)
Sun 05:15:17 PM	34.7531	141.7042	↘ 128°	565.0	650.0	37200.0	1,000 Climbing	FlightAware ADS-B (NRT / RJAA)
Sun 05:15:44 PM	34.707	141.7612	↘ 140°	555.0	639.0	37625.0	1,300 Climbing	FlightAware ADS-B (IBR / RJAH)
Sun 05:16:02 PM	34.6678	141.7954	↘ 148°	538.0	619.0	38175.0	1,750 Climbing	FlightAware ADS-B (NRT / RJAA)
Sun 05:16:20 PM	34.6303	141.8198	↘ 155°	523.0	602.0	38675.0	1,200 Climbing	FlightAware ADS-B (HND / RJTT)
Sun 05:16:37 PM	34.5928	141.8392	↘ 155°	523.0	602.0	38875.0	469 Climbing	FlightAware ADS-B (OKO / RJTY)
Sun 05:17:08 PM	34.5285	141.887	↘ 142°	551.0	634.0	39050.0	367 Climbing	FlightAware ADS-B (HND / RJTT)
Sun 05:17:26 PM	34.4925	141.9269	↘ 134°	564.0	649.0	39175.0	538 Climbing	FlightAware ADS-B (NJA / RJTA)
Sun 05:18:01 PM	34.439	142.0174	↘ 118°	583.0	671.0	39525.0	588 Climbing	FlightAware ADS-B (FKS / RJSF)
Sun 05:18:17 PM	34.4213	142.0654	→ 110°	587.0	676.0	39675.0	670 Climbing	FlightAware ADS-B (NRT / RJAA)
Sun 05:18:57 PM	34.3868	142.1902	→ 109°	587.0	676.0	40150.0	750 Climbing	FlightAware ADS-B (RJTF)
Sun 05:19:27 PM	34.3609	142.283	→ 109°	585.0	673.0	40550.0	675 Climbing	FlightAware ADS-B (FKS / RJSF)
Sun 05:19:57 PM	34.3344	142.3768	→ 109°	585.0	673.0	40825.0	443 Climbing	FlightAware ADS-B (OKO / RJTY)
Sun 05:20:28 PM	34.3076	142.472	→ 109°	588.0	677.0	41000.0	167 Climbing	FlightAware ADS-B (FKS / RJSF)
Sun 05:21:00 PM	34.2793	142.5727	→ 109°	591.0	680.0	41000.0	Level	FlightAware ADS-B (HND / RJTT)
Sun 05:21:32 PM	34.2519	142.6691	→ 109°	592.0	681.0	41000.0	Level	FlightAware ADS-B (HND / RJTT)
Sun 05:22:04 PM	34.2236	142.7688	→ 109°	590.0	679.0	41000.0	Level	FlightAware ADS-B (HND / RJTT)
Sun 05:22:34 PM	34.197	142.8622	→ 109°	589.0	678.0	41000.0	Level	FlightAware ADS-B (HND / RJTT)
Sun 05:23:07 PM	34.1667	142.9681	→ 109°	587.0	676.0	41000.0	Level	FlightAware ADS-B (HND / RJTT)
Sun 05:23:38 PM	34.1394	143.0633	→ 109°	587.0	676.0	41000.0	Level	FlightAware ADS-B (NJA / RJTA)
Sun 05:24:08 PM	34.1122	143.1576	→ 109°	585.0	673.0	41000.0	Level	FlightAware ADS-B (HND / RJTT)
Sun 05:24:51 PM	34.0744	143.2869	→ 110°	585.0	673.0	41000.0	Level	FlightAware ADS-B (HND / RJTT)
Sun 05:25:24 PM	34.0447	143.3881	→ 109°	582.0	670.0	41000.0	Level	FlightAware ADS-B (HND / RJTT)
Sun 05:25:57 PM	34.0146	143.4905	→ 110°	578.0	665.0	41000.0	Level	FlightAware ADS-B (HND / RJTT)
Sun 05:26:27 PM	33.9878	143.5812	→ 110°	578.0	665.0	41000.0	Level	FlightAware ADS-B (IBR / RJAH)
Sun 05:27:06 PM	33.9541	143.6944	→ 110°	574.0	661.0	41000.0	Level	FlightAware ADS-B (FKS / RJSF)
Sun 05:27:36 PM	33.9266	143.7867	→ 110°	574.0	661.0	41000.0	Level	FlightAware ADS-B (FKS / RJSF)
Sun 05:28:06 PM	33.8995	143.8776	→ 110°	574.0	661.0	41000.0	Level	FlightAware ADS-B (FKS / RJSF)
Sun 05:29:00 PM	33.851	144.0389	→ 110°	573.0	659.0	41000.0	Level	FlightAware ADS-B (HND / RJTT)
Sun 05:29:44 PM	33.8107	144.1727	→ 110°	573.0	659.0	41000.0	Level	FlightAware ADS-B (NRT / RJAA)
Sun 07:22:53 PM	32.1	166.1667	→ 91°	582.0	670.0	41000.0	Level	Oakland Oceanic
Sun 07:25:12 PM	32.0947	166.589	→ 91°	582.0	670.0	41000.0	Level	FlightAware Transoceanic
Sun 07:26:12 PM	32.0918	166.7808	→ 91°	582.0	670.0	41000.0	Level	FlightAware Transoceanic
Sun 07:28:04 PM	32.0856	167.1387	→ 91°	582.0	670.0	41000.0	Level	FlightAware Transoceanic
Sun 07:29:23 PM	32.0806	167.3912	→ 91°	582.0	670.0	41000.0	Level	FlightAware Transoceanic
Sun 07:32:04 PM	32.069	167.9057	→ 92°	582.0	670.0	41000.0	Level	FlightAware Transoceanic
Sun 07:32:29 PM	32.0667	168.0167	→ 92°	578.0	665.0	41000.0	Level	Oakland Oceanic
Sun 07:34:36 PM	32.0537	168.486	→ 92°	578.0	665.0	41000.0	Level	FlightAware Transoceanic
Sun 07:36:35 PM	32.0427	168.8436	→ 92°	578.0	665.0	41000.0	Level	FlightAware Transoceanic
Sun 07:37:42 PM	32.036	169.0449	→ 92°	578.0	665.0	41000.0	Level	FlightAware Transoceanic
Sun 07:39:39 PM	32.0236	169.3964	→ 92°	578.0	665.0	41000.0	Level	FlightAware Transoceanic
Sun 07:40:52 PM	32.0153	169.6156	→ 93°	578.0	665.0	41000.0	Level	FlightAware Transoceanic
Sun 07:42:07 PM	32.0	169.85	→ 90°	505.0	581.0	41000.0	Level	Oakland Oceanic
Sun 07:42:59 PM	32.0	170.0	→ 94°	564.0	649.0	41000.0	Level	Oakland Oceanic
Sun 07:45:05 PM	31.9764	170.3822	→ 94°	564.0	649.0	41000.0	Level	FlightAware Transoceanic
Sun 07:46:37 PM	31.9584	170.6635	→ 94°	564.0	649.0	41000.0	Level	FlightAware Transoceanic
Sun 07:48:08 PM	31.9399	170.9415	→ 95°	564.0	649.0	41000.0	Level	FlightAware Transoceanic
Sun 07:50:10 PM	31.9141	171.3141	→ 95°	564.0	649.0	41000.0	Level	FlightAware Transoceanic
Sun 07:51:35 PM	31.8956	171.5735	→ 95°	564.0	649.0	41000.0	Level	FlightAware Transoceanic
Sun 07:51:42 PM	31.8833	171.65	→ 95°	564.0	649.0	41000.0	Level	Oakland Oceanic
Sun 07:53:41 PM	31.8601	171.9649	→ 95°	564.0	649.0	41000.0	Level	FlightAware Transoceanic
Sun 07:55:06 PM	31.84	172.2299	→ 95°	564.0	649.0	41000.0	Level	FlightAware Transoceanic
Sun 07:56:50 PM	31.8146	172.5538	→ 95°	564.0	649.0	41000.0	Level	FlightAware Transoceanic
Sun 07:58:08 PM	31.795	172.7967	→ 95°	564.0	649.0	41000.0	Level	FlightAware Transoceanic
Sun 07:59:50 PM	31.7687	173.1141	→ 96°	564.0	649.0	41000.0	Level	FlightAware Transoceanic
Sun 08:01:17 PM	31.75	173.4333	→ 96°	564.0	649.0	41000.0	Level	Oakland Oceanic
Sun 08:03:51 PM	31.7029	173.9565	→ 96°	564.0	649.0	41000.0	Level	FlightAware Transoceanic
Sun 08:05:05 PM	31.6819	174.1829	→ 96°	564.0	649.0	41000.0	Level	FlightAware Transoceanic
Sun 08:07:19 PM	31.6427	174.5925	→ 97°	564.0	649.0	41000.0	Level	FlightAware Transoceanic
Sun 08:09:09 PM	31.6096	174.9286	→ 97°	564.0	649.0	41000.0	Level	FlightAware Transoceanic
Sun 08:10:54 PM	31.5833	175.2	→ 97°	563.0	648.0	41000.0	Level	Oakland Oceanic
Sun 08:12:38 PM	31.5519	175.5032	→ 97°	563.0	648.0	41000.0	Level	FlightAware Transoceanic
Sun 08:14:39 PM	31.5122	175.8773	→ 97°	563.0	648.0	41000.0	Level	FlightAware Transoceanic
Sun 08:15:47 PM	31.4894	176.0874	→ 97°	563.0	648.0	41000.0	Level	FlightAware Transoceanic
Sun 08:17:45 PM	31.4491	176.4517	→ 97°	563.0	648.0	41000.0	Level	FlightAware Transoceanic
Sun 08:20:04 PM	31.4002	176.8805	→ 98°	563.0	648.0	41000.0	Level	FlightAware Transoceanic
Sun 08:20:30 PM	31.3833	176.9667	→ 98°	562.0	647.0	41000.0	Level	Oakland Oceanic
Sun 08:23:14 PM	31.3159	177.5457	→ 98°	562.0	647.0	41000.0	Level	FlightAware Transoceanic
Sun 08:25:05 PM	31.2762	177.8765	→ 98°	562.0	647.0	41000.0	Level	FlightAware Transoceanic
Sun 08:26:36 PM	31.243	178.1474	→ 98°	562.0	647.0	41000.0	Level	FlightAware Transoceanic
Sun 08:28:04 PM	31.2103	178.4092	→ 98°	562.0	647.0	41000.0	Level	FlightAware Transoceanic
Sun 08:29:36 PM	31.1756	178.6828	→ 99°	562.0	647.0	41000.0	Level	FlightAware Transoceanic
Sun 08:30:06 PM	31.1667	178.7	→ 98°	548.0	631.0	41000.0	Level	Oakland Oceanic
Sun 08:31:53 PM	31.1231	179.0502	→ 98°	548.0	631.0	41000.0	Level	FlightAware Transoceanic
Sun 08:33:06 PM	31.0945	179.2763	→ 98°	548.0	631.0	41000.0	Level	FlightAware Transoceanic
Sun 08:34:40 PM	31.057	179.5672	→ 99°	548.0	631.0	41000.0	Level	FlightAware Transoceanic
Sun 08:36:42 PM	31.0074	179.9444	→ 99°	548.0	631.0	41000.0	Level	FlightAware Transoceanic
Sun 08:37:32 PM	31.0	180.0	→ 107°	552.0	635.0	41000.0	Level	Oakland Oceanic
Sun 08:39:42 PM	30.9	-179.6	→ 107°	552.0	635.0	41000.0	Level	Oakland Oceanic
Sun 08:41:51 PM	30.817	-179.2799	→ 107°	552.0	635.0	41000.0	Level	FlightAware Transoceanic
Sun 08:43:07 PM	30.7597	-179.061	→ 107°	552.0	635.0	41000.0	Level	FlightAware Transoceanic
Sun 08:45:24 PM	30.6555	-178.6672	→ 107°	552.0	635.0	41000.0	Level	FlightAware Transoceanic
Sun 08:47:18 PM	30.5679	-178.3401	→ 107°	552.0	635.0	41000.0	Level	FlightAware Transoceanic
Sun 08:49:18 PM	30.4667	-177.95	→ 108°	550.0	633.0	41000.0	Level	Oakland Oceanic
Sun 08:51:36 PM	30.3454	-177.5096	→ 108°	550.0	633.0	41000.0	Level	FlightAware Transoceanic
Sun 08:53:52 PM	30.2385	-177.1266	→ 108°	550.0	633.0	41000.0	Level	FlightAware Transoceanic
Sun 08:55:59 PM	30.1376	-176.7697	→ 108°	550.0	633.0	41000.0	Level	FlightAware Transoceanic
Sun 08:58:01 PM	30.0398	-176.4275	→ 108°	550.0	633.0	41000.0	Level	FlightAware Transoceanic
Sun 08:58:54 PM	30.0	-176.3167	→ 108°	549.0	632.0	41000.0	Level	Oakland Oceanic
Sun 09:08:33 PM	29.5333	-174.7167	→ 109°	552.0	635.0	41000.0	Level	Oakland Oceanic
Sun 09:11:34 PM	29.3537	-174.1294	→ 109°	552.0	635.0	41000.0	Level	FlightAware Transoceanic
Sun 09:13:08 PM	29.2739	-173.8719	→ 110°	552.0	635.0	41000.0	Level	FlightAware Transoceanic
Sun 09:14:38 PM	29.1972	-173.6258	→ 110°	552.0	635.0	41000.0	Level	FlightAware Transoceanic
Sun 09:17:04 PM	29.0716	-173.2274	→ 110°	552.0	635.0	41000.0	Level	FlightAware Transoceanic
Sun 09:18:05 PM	29.0333	-173.1167	→ 110°	546.0	628.0	41000.0	Level	Oakland Oceanic
Sun 09:18:07 PM	29.0171	-173.0557	→ 110°	552.0	635.0	41000.0	Level	FlightAware Transoceanic
Sun 09:20:05 PM	28.9235	-172.7722	→ 110°	546.0	628.0	41000.0	Level	FlightAware Transoceanic
Sun 09:22:10 PM	28.8128	-172.4282	→ 110°	546.0	628.0	41000.0	Level	FlightAware Transoceanic
Sun 09:24:28 PM	28.6896	-172.0493	→ 110°	546.0	628.0	41000.0	Level	FlightAware Transoceanic
Sun 09:26:05 PM	28.6024	-171.7834	↘ 111°	546.0	628.0	41000.0	Level	FlightAware Transoceanic
Sun 09:27:42 PM	28.5167	-171.5333	↘ 111°	553.0	636.0	41000.0	Level	Oakland Oceanic
Sun 09:29:38 PM	28.4242	-171.2537	↘ 111°	553.0	636.0	41000.0	Level	FlightAware Transoceanic
Sun 09:31:35 PM	28.313	-170.9209	↘ 111°	553.0	636.0	41000.0	Level	FlightAware Transoceanic
Sun 09:32:39 PM	28.2519	-170.7391	↘ 111°	553.0	636.0	41000.0	Level	FlightAware Transoceanic
Sun 09:34:39 PM	28.1366	-170.3989	↘ 111°	553.0	636.0	41000.0	Level	FlightAware Transoceanic
Sun 09:35:56 PM	28.0621	-170.1809	↘ 111°	553.0	636.0	41000.0	Level	FlightAware Transoceanic
Sun 09:37:06 PM	28.0	-170.0	↘ 119°	556.0	640.0	41000.0	Level	Oakland Oceanic
Sun 09:37:18 PM	27.9833	-169.95	↘ 119°	556.0	640.0	41000.0	Level	Oakland Oceanic
Sun 09:40:04 PM	27.7566	-169.4835	↘ 119°	556.0	640.0	41000.0	Level	FlightAware Transoceanic
Sun 09:41:10 PM	27.6749	-169.3166	↘ 119°	556.0	640.0	41000.0	Level	FlightAware Transoceanic
Sun 09:42:12 PM	27.5979	-169.1601	↘ 119°	556.0	640.0	41000.0	Level	FlightAware Transoceanic
Sun 09:43:16 PM	27.5183	-168.9987	↘ 119°	556.0	640.0	41000.0	Level	FlightAware Transoceanic
Sun 09:44:23 PM	27.4348	-168.8301	↘ 119°	556.0	640.0	41000.0	Level	FlightAware Transoceanic
Sun 09:46:37 PM	27.2671	-168.4935	↘ 119°	556.0	640.0	41000.0	Level	FlightAware Transoceanic
Sun 09:46:54 PM	27.2667	-168.4833	↘ 119°	551.0	634.0	41000.0	Level	Oakland Oceanic
Sun 09:49:38 PM	27.0663	-168.0849	↘ 120°	551.0	634.0	41000.0	Level	FlightAware Transoceanic
Sun 09:51:44 PM	26.9058	-167.7684	↘ 120°	551.0	634.0	41000.0	Level	FlightAware Transoceanic
Sun 09:53:51 PM	26.7432	-167.4503	↘ 120°	551.0	634.0	41000.0	Level	FlightAware Transoceanic
Sun 09:55:06 PM	26.6469	-167.2629	↘ 120°	551.0	634.0	41000.0	Level	FlightAware Transoceanic
Sun 09:56:30 PM	26.5333	-167.05	↘ 120°	547.0	629.0	41000.0	Level	Oakland Oceanic
Sun 09:58:52 PM	26.3198	-166.6389	↘ 120°	547.0	629.0	41000.0	Level	FlightAware Transoceanic
Sun 10:00:03 PM	26.2313	-166.4696	↘ 120°	547.0	629.0	41000.0	Level	FlightAware Transoceanic
Sun 10:01:52 PM	26.0951	-166.2103	↘ 120°	547.0	629.0	41000.0	Level	FlightAware Transoceanic
Sun 10:03:06 PM	26.0023	-166.0345	↘ 120°	547.0	629.0	41000.0	Level	FlightAware Transoceanic
Sun 10:04:19 PM	25.9106	-165.8615	↘ 121°	547.0	629.0	41000.0	Level	FlightAware Transoceanic
Sun 10:06:06 PM	25.8	-165.6667	↘ 121°	542.0	624.0	41000.0	Level	Oakland Oceanic
Sun 10:08:04 PM	25.6422	-165.371	↘ 121°	542.0	624.0	41000.0	Level	FlightAware Transoceanic
Sun 10:09:37 PM	25.5235	-165.1495	↘ 121°	542.0	624.0	41000.0	Level	FlightAware Transoceanic
Sun 10:11:37 PM	25.3697	-164.8643	↘ 121°	542.0	624.0	41000.0	Level	FlightAware Transoceanic
Sun 10:12:44 PM	25.2837	-164.7054	↘ 121°	542.0	624.0	41000.0	Level	FlightAware Transoceanic
Sun 10:13:51 PM	25.1974	-164.5467	↘ 121°	542.0	624.0	41000.0	Level	FlightAware Transoceanic
Sun 10:14:58 PM	25.111	-164.3883	↘ 121°	542.0	624.0	41000.0	Level	FlightAware Transoceanic
Sun 10:15:41 PM	25.0667	-164.3	↘ 121°	538.0	619.0	41000.0	Level	Oakland Oceanic
Sun 10:22:53 PM	24.4833	-163.2667	↘ 122°	520.0	598.0	41000.0	Level	Honolulu Center
Sun 10:23:21 PM	24.45	-163.2	↘ 119°	540.0	621.0	41000.0	Level	Honolulu Center
Sun 10:24:22 PM	24.3667	-163.05	↘ 121°	540.0	621.0	41000.0	Level	Honolulu Center
Sun 10:25:21 PM	24.2833	-162.9167	↘ 124°	550.0	633.0	41000.0	Level	Honolulu Center
Sun 10:26:22 PM	24.2	-162.7833	↘ 124°	550.0	633.0	41000.0	Level	Honolulu Center
Sun 10:27:22 PM	24.1167	-162.65	↘ 124°	550.0	633.0	41000.0	Level	Honolulu Center
Sun 10:28:22 PM	24.0333	-162.5167	↘ 124°	540.0	621.0	41000.0	Level	Honolulu Center
Sun 10:29:22 PM	23.95	-162.3667	↘ 121°	540.0	621.0	41000.0	Level	Honolulu Center
Sun 10:30:22 PM	23.85	-162.2167	↘ 126°	550.0	633.0	41000.0	-350 Descending	Honolulu Center
Sun 10:31:22 PM	23.7667	-162.0833	↘ 124°	560.0	644.0	40300.0	-800 Descending	Honolulu Center
Sun 10:32:22 PM	23.6833	-161.95	↘ 124°	560.0	644.0	39400.0	-1,000 Descending	Honolulu Center
Sun 10:33:22 PM	23.5833	-161.8	↘ 126°	560.0	644.0	38300.0	-1,012 Descending	Honolulu Center
Sun 10:33:45 PM	23.5627	-161.7574	↘ 124°	554.0	638.0	38000.0	-225 Descending	FlightAware ADS-B (OGG / PHOG)
Sun 10:34:42 PM	23.4798	-161.6268	↘ 125°	560.0	644.0	38000.0	Level	FlightAware ADS-B (OGG / PHOG)
Sun 10:35:42 PM	23.4074	-161.5131	↘ 125°	562.0	647.0	38000.0	Level	FlightAware ADS-B (OGG / PHOG)
Sun 10:37:23 PM	23.2333	-161.25	↘ 125°	560.0	644.0	38000.0	Level	Honolulu Center
Sun 10:38:23 PM	23.15	-161.1	↘ 121°	560.0	644.0	38000.0	Level	Honolulu Center
Sun 10:39:23 PM	23.05	-160.9667	↘ 129°	560.0	644.0	38000.0	Level	Honolulu Center
Sun 10:40:23 PM	22.9667	-160.8167	↘ 121°	570.0	656.0	38000.0	Level	Honolulu Center
Sun 10:41:07 PM	22.9017	-160.7272	↘ 127°	573.0	659.0	38000.0	Level	FlightAware ADS-B (LIH / PHLI)
Sun 10:42:02 PM	22.81	-160.6037	↘ 129°	574.0	661.0	38000.0	Level	FlightAware ADS-B (LIH / PHLI)
Sun 10:42:32 PM	22.7606	-160.5364	↘ 128°	575.0	662.0	38000.0	Level	FlightAware ADS-B (LIH / PHLI)
Sun 10:43:02 PM	22.7111	-160.4683	↘ 128°	576.0	663.0	38000.0	Level	FlightAware ADS-B (LIH / PHLI)
Sun 10:43:32 PM	22.6614	-160.3999	↘ 128°	576.0	663.0	38000.0	Level	FlightAware ADS-B (LIH / PHLI)
Sun 10:44:02 PM	22.6128	-160.3333	↘ 128°	575.0	662.0	38000.0	Level	FlightAware ADS-B (LIH / PHLI)
Sun 10:44:32 PM	22.5636	-160.2658	↘ 128°	575.0	662.0	38000.0	Level	FlightAware ADS-B (LIH / PHLI)
Sun 10:45:03 PM	22.5129	-160.1964	↘ 128°	574.0	661.0	38000.0	Level	FlightAware ADS-B (LIH / PHLI)
Sun 10:45:33 PM	22.4636	-160.1292	↘ 128°	575.0	662.0	38000.0	Level	FlightAware ADS-B (LIH / PHLI)
Sun 10:46:09 PM	22.4033	-160.0467	↘ 128°	575.0	662.0	38000.0	Level	FlightAware ADS-B (PHNL)
Sun 10:46:39 PM	22.3524	-159.9775	↘ 128°	575.0	662.0	38000.0	Level	FlightAware ADS-B (PHNL)
Sun 10:47:11 PM	22.3017	-159.9086	↘ 128°	574.0	661.0	38000.0	Level	FlightAware ADS-B (OGG / PHOG)
Sun 10:47:41 PM	22.2519	-159.8409	↘ 128°	573.0	659.0	38000.0	Level	FlightAware ADS-B (KOA / PHKO)
Sun 10:48:11 PM	22.2024	-159.7738	↘ 128°	573.0	659.0	38000.0	Level	FlightAware ADS-B (OGG / PHOG)
Sun 10:48:41 PM	22.1544	-159.7087	↘ 128°	570.0	656.0	38000.0	Level	FlightAware ADS-B (OGG / PHOG)
Sun 10:49:11 PM	22.1036	-159.6399	↘ 129°	570.0	656.0	38000.0	Level	FlightAware ADS-B (OGG / PHOG)
Sun 10:49:41 PM	22.0555	-159.575	↘ 128°	569.0	655.0	38000.0	Level	FlightAware ADS-B (KOA / PHKO)
Sun 10:50:11 PM	22.0043	-159.5059	↘ 128°	568.0	654.0	38000.0	Level	FlightAware ADS-B (OGG / PHOG)
Sun 10:50:42 PM	21.9575	-159.4427	↘ 128°	567.0	652.0	38000.0	Level	FlightAware ADS-B (OGG / PHOG)
Sun 10:51:14 PM	21.9047	-159.3715	↘ 128°	565.0	650.0	38000.0	Level	FlightAware ADS-B (MUE / PHMU)
Sun 10:52:03 PM	21.8204	-159.258	↘ 129°	566.0	651.0	38000.0	Level	FlightAware ADS-B (PHNL)
Sun 10:52:33 PM	21.7723	-159.1935	↘ 129°	567.0	652.0	38000.0	Level	FlightAware ADS-B (PHIK)
Sun 10:53:03 PM	21.7228	-159.1271	↘ 129°	568.0	654.0	38000.0	Level	FlightAware ADS-B (LIH / PHLI)
Sun 10:53:34 PM	21.6714	-159.0584	↘ 129°	569.0	655.0	38000.0	Level	FlightAware ADS-B (LIH / PHLI)
Sun 10:54:04 PM	21.6216	-158.9919	↘ 129°	569.0	655.0	38000.0	Level	FlightAware ADS-B (PHNL)
Sun 10:54:34 PM	21.5726	-158.9263	↘ 129°	569.0	655.0	38000.0	Level	FlightAware ADS-B (NGF / PHNG)
Sun 10:55:04 PM	21.5248	-158.8626	↘ 129°	568.0	654.0	38000.0	-369 Descending	FlightAware ADS-B (LIH / PHLI)
Sun 10:55:35 PM	21.4728	-158.7933	↘ 129°	567.0	652.0	37625.0	-934 Descending	FlightAware ADS-B (KOA / PHKO)
Sun 10:56:05 PM	21.4237	-158.728	↘ 129°	568.0	654.0	37050.0	-1,275 Descending	FlightAware ADS-B (KOA / PHKO)
Sun 10:56:35 PM	21.3744	-158.6625	↘ 129°	576.0	663.0	36350.0	-1,575 Descending	FlightAware ADS-B (KOA / PHKO)
Sun 10:57:05 PM	21.3229	-158.5939	↘ 129°	583.0	671.0	35475.0	-1,800 Descending	FlightAware ADS-B (KOA / PHKO)
Sun 10:57:35 PM	21.2723	-158.527	↘ 129°	583.0	671.0	34550.0	-1,900 Descending	FlightAware ADS-B (KOA / PHKO)
Sun 10:58:05 PM	21.2212	-158.4593	↘ 129°	580.0	667.0	33575.0	-1,925 Descending	FlightAware ADS-B (KOA / PHKO)
Sun 10:58:35 PM	21.1717	-158.3936	↘ 129°	593.0	682.0	32625.0	-2,025 Descending	FlightAware ADS-B (KOA / PHKO)
Sun 10:59:05 PM	21.1189	-158.3235	↘ 129°	602.0	693.0	31550.0	-2,016 Descending	FlightAware ADS-B (KOA / PHKO)
Sun 10:59:36 PM	21.0646	-158.252	↘ 129°	594.0	684.0	30575.0	-1,820 Descending	FlightAware ADS-B (KOA / PHKO)
Sun 11:00:06 PM	21.0119	-158.183	↘ 129°	587.0	676.0	29700.0	-1,975 Descending	FlightAware ADS-B (PHNL)
Sun 11:00:36 PM	20.9616	-158.117	↘ 129°	579.0	666.0	28600.0	-2,125 Descending	FlightAware ADS-B (KOA / PHKO)
Sun 11:01:06 PM	20.9102	-158.0494	↘ 129°	568.0	654.0	27575.0	-1,575 Descending	FlightAware ADS-B (PHNL)
Sun 11:01:36 PM	20.862	-157.9859	↘ 129°	548.0	631.0	27025.0	-600 Descending	FlightAware ADS-B (KOA / PHKO)
Sun 11:02:06 PM	20.8157	-157.925	↘ 129°	544.0	626.0	26975.0	-25 Descending	FlightAware ADS-B (KOA / PHKO)
Sun 11:02:36 PM	20.7672	-157.8613	↘ 129°	549.0	632.0	27000.0	25 Climbing	FlightAware ADS-B (KOA / PHKO)
Sun 11:03:06 PM	20.7183	-157.7973	↘ 129°	552.0	635.0	27000.0	-516 Descending	FlightAware ADS-B (KOA / PHKO)
Sun 11:03:37 PM	20.6683	-157.732	↘ 129°	550.0	633.0	26475.0	-1,377 Descending	FlightAware ADS-B (OGG / PHOG)
Sun 11:04:07 PM	20.6208	-157.6702	↘ 129°	534.0	615.0	25600.0	-1,900 Descending	FlightAware ADS-B (OGG / PHOG)
Sun 11:04:37 PM	20.5737	-157.6089	↘ 129°	531.0	611.0	24575.0	-2,100 Descending	FlightAware ADS-B (OGG / PHOG)
Sun 11:05:07 PM	20.5266	-157.5476	↘ 129°	525.0	604.0	23500.0	-1,900 Descending	FlightAware ADS-B (OGG / PHOG)
Sun 11:05:37 PM	20.4806	-157.4874	↘ 129°	516.0	594.0	22675.0	-1,900 Descending	FlightAware ADS-B (OGG / PHOG)
Sun 11:06:07 PM	20.4356	-157.4289	↘ 129°	508.0	585.0	21600.0	-2,164 Descending	FlightAware ADS-B (OGG / PHOG)
Sun 11:06:38 PM	20.391	-157.3709	↘ 129°	493.0	567.0	20475.0	-1,943 Descending	FlightAware ADS-B (PHNL)
Sun 11:07:08 PM	20.3493	-157.3169	↘ 129°	449.0	517.0	19625.0	-1,725 Descending	FlightAware ADS-B (OGG / PHOG)
Sun 11:07:38 PM	20.3116	-157.2679	↘ 129°	414.0	476.0	18750.0	-1,800 Descending	FlightAware ADS-B (PHNL)
Sun 11:08:08 PM	20.2755	-157.2212	↘ 129°	407.0	468.0	17825.0	-1,725 Descending	FlightAware ADS-B (OGG / PHOG)
Sun 11:08:38 PM	20.2391	-157.1742	↘ 129°	402.0	463.0	17025.0	-1,451 Descending	FlightAware ADS-B (OGG / PHOG)
Sun 11:09:09 PM	20.2035	-157.1279	↘ 129°	390.0	449.0	16350.000000000002	-1,279 Descending	FlightAware ADS-B (KOA / PHKO)
Sun 11:09:39 PM	20.1687	-157.083	↘ 129°	377.0	434.0	15725.0	-1,750 Descending	FlightAware ADS-B (KOA / PHKO)
Sun 11:10:09 PM	20.1365	-157.0416	↘ 130°	384.0	442.0	14600.0	-1,750 Descending	FlightAware ADS-B (KOA / PHKO)
Sun 11:10:39 PM	20.1034	-156.9988	↘ 129°	373.0	429.0	13975.0	-1,350 Descending	FlightAware ADS-B (KOA / PHKO)
Sun 11:11:09 PM	20.0702	-156.9557	↘ 129°	365.0	420.0	13250.0	-1,375 Descending	FlightAware ADS-B (KOA / PHKO)
Sun 11:11:39 PM	20.0385	-156.915	↘ 130°	357.0	411.0	12600.0	-1,550 Descending	FlightAware ADS-B (KOA / PHKO)
Sun 11:12:09 PM	20.0073	-156.875	↘ 129°	356.0	410.0	11700.0	-1,575 Descending	FlightAware ADS-B (PHHI)
Sun 11:12:39 PM	19.9753	-156.8339	↘ 130°	347.0	399.0	11025.0	-1,150 Descending	FlightAware ADS-B (KOA / PHKO)
Sun 11:13:09 PM	19.9456	-156.7957	↘ 129°	334.0	384.0	10550.0	-700 Descending	FlightAware ADS-B (KOA / PHKO)
Sun 11:13:39 PM	19.9161	-156.7579	↘ 129°	314.0	361.0	10325.0	-616 Descending	FlightAware ADS-B (KOA / PHKO)
Sun 11:14:05 PM	19.8924	-156.7274	↘ 129°	307.0	353.0	9975.0	-663 Descending	FlightAware ADS-B (KOA / PHKO)
Sun 11:14:22 PM	19.8778	-156.7086	↘ 129°	305.0	351.0	9850.0	-469 Descending	FlightAware ADS-B (OGG / PHOG)
Sun 11:14:53 PM	19.8503	-156.6733	↘ 130°	305.0	351.0	9600.0	-689 Descending	FlightAware ADS-B (OGG / PHOG)
Sun 11:15:23 PM	19.8232	-156.6385	↘ 130°	305.0	351.0	9150.0	-925 Descending	FlightAware ADS-B (OGG / PHOG)
Sun 11:15:53 PM	19.7963	-156.604	↘ 130°	305.0	351.0	8675.0	-959 Descending	FlightAware ADS-B (KOA / PHKO)
Sun 11:16:24 PM	19.7673	-156.5669	↘ 130°	301.0	346.0	8175.000000000001	-926 Descending	FlightAware ADS-B (KOA / PHKO)
Sun 11:16:40 PM	19.7538	-156.5497	↘ 130°	297.0	342.0	7950.0	-894 Descending	FlightAware ADS-B (PHHI)
Sun 11:17:11 PM	19.7268	-156.5151	↘ 130°	290.0	334.0	7475.0	-885 Descending	FlightAware ADS-B (KOA / PHKO)
Sun 11:17:41 PM	19.7014	-156.4826	↘ 129°	287.0	330.0	7050.0	-875 Descending	FlightAware ADS-B (OGG / PHOG)
Sun 11:18:11 PM	19.6761	-156.4503	↘ 129°	283.0	326.0	6600.0	-900 Descending	FlightAware ADS-B (OGG / PHOG)
Sun 11:18:41 PM	19.6511	-156.4182	↘ 130°	274.0	315.0	6150.0	-875 Descending	FlightAware ADS-B (KOA / PHKO)
Sun 11:19:11 PM	19.6271	-156.3877	↘ 130°	273.0	314.0	5725.0	-825 Descending	FlightAware ADS-B (KOA / PHKO)
Sun 11:19:41 PM	19.6028	-156.3567	↘ 130°	273.0	314.0	5325.0	-825 Descending	FlightAware ADS-B (OGG / PHOG)
Sun 11:20:11 PM	19.5789	-156.3262	↘ 130°	274.0	315.0	4900.0	-850 Descending	FlightAware ADS-B (OGG / PHOG)
Sun 11:20:41 PM	19.5547	-156.2954	↘ 130°	271.0	312.0	4475.0	-875 Descending	FlightAware ADS-B (OGG / PHOG)
Sun 11:20:59 PM	19.5409	-156.2751	↘ 115°	272.0	313.0	4200.0	-708 Descending	FlightAware ADS-B (KOA / PHKO)
Sun 11:21:17 PM	19.5379	-156.2521	→ 87°	269.0	310.0	4050.0	-469 Descending	FlightAware ADS-B (OGG / PHOG)
Sun 11:21:47 PM	19.552	-156.2162	↗ 61°	259.0	298.0	3825.0	-590 Descending	FlightAware ADS-B (OGG / PHOG)
Sun 11:22:18 PM	19.569	-156.1834	↗ 61°	222.0	255.0	3450.0	-734 Descending	FlightAware ADS-B (KOA / PHKO)
Sun 11:22:34 PM	19.5764	-156.1697	↗ 61°	210.0	242.0	3250.0	-1,076 Descending	FlightAware ADS-B (KOA / PHKO)
Sun 11:23:04 PM	19.5904	-156.1438	↗ 60°	204.0	235.0	2625.0	-1,150 Descending	FlightAware ADS-B (MUE / PHMU)
Sun 11:23:34 PM	19.6052	-156.117	↗ 60°	203.0	234.0	2100.0	-885 Descending	FlightAware ADS-B (KOA / PHKO)
Sun 11:24:05 PM	19.6196	-156.0909	↗ 60°	194.0	223.0	1725.0	-388 Descending	FlightAware ADS-B (KOA / PHKO)
Sun 11:24:32 PM	19.6315	-156.0695	↗ 58°	187.0	215.0	1725.0	Level	FlightAware ADS-B (KOA / PHKO)
Sun 11:24:48 PM	19.6413	-156.059	↗ 32°	176.0	203.0	1725.0	-353 Descending	FlightAware ADS-B (KOA / PHKO)
Sun 11:25:06 PM	19.6541	-156.0539	↑ 14°	159.0	183.0	1525.0	-846 Descending	FlightAware ADS-B (KOA / PHKO)
Sun 11:25:27 PM	19.6684	-156.052	↑ 4°	145.0	167.0	1175.0	-932 Descending	FlightAware ADS-B (KOA / PHKO)
Sun 11:25:43 PM	19.679	-156.051	↑ 5°	134.0	154.0	950.0	-797 Descending	FlightAware ADS-B (KOA / PHKO)
Sun 11:25:59 PM	19.6881	-156.0503	↑ 5°	126.0	145.0	750.0	-727 Descending	FlightAware ADS-B (KOA / PHKO)
Sun 11:26:16 PM	19.6984	-156.0492	↑ 5°	124.0	143.0	550.0	-706 Descending	FlightAware ADS-B (KOA / PHKO)
