# Supplementary material for: TrackMatcher – a tool for finding intercepts in tracks of geographical positions
Source: Copernicus journal article supplement (doi:10.5194/gmd-15-7557-2022), 2022-10-18
Supplement: Supplementary file 1 [file gmd-15-7557-2022-supplement.zip › ESM/example/data/flights/JAL770_27-JAN-2019_RJAA-PHKO.dat]

Time (CET)	Latitude	Longitude	Course	kts	mph	feet	Rate	Reporting Facility
Sun 01:54:07 PM	35.8091	140.3436	↖ 330°	168.0	193.0	3275.0	Level	FlightAware ADS-B (NRT / RJAA)
Sun 01:54:23 PM	35.8204	140.3354	↖ 330°	187.0	215.0	3700.0	1,682 Climbing	FlightAware ADS-B (HND / RJTT)
Sun 01:54:40 PM	35.8338	140.3255	↖ 330°	206.0	237.0	4200.0	2,068 Climbing	FlightAware ADS-B (HND / RJTT)
Sun 01:55:00 PM	35.852	140.3121	↖ 329°	230.0	265.0	4975.0	2,538 Climbing	FlightAware ADS-B (OKO / RJTY)
Sun 01:55:19 PM	35.8695	140.2996	↖ 331°	239.0	275.0	5850.0	2,351 Climbing	FlightAware ADS-B (IBR / RJAH)
Sun 01:55:37 PM	35.8884	140.2938	↑ 1°	244.0	281.0	6425.0	1,456 Climbing	FlightAware ADS-B (HND / RJTT)
Sun 01:55:53 PM	35.9059	140.3	↗ 29°	252.0	290.0	6675.0	750 Climbing	FlightAware ADS-B (IBR / RJAH)
Sun 01:56:11 PM	35.9206	140.321	→ 66°	262.0	302.0	6850.0	1,417 Climbing	FlightAware ADS-B (IBR / RJAH)
Sun 01:56:29 PM	35.9239	140.3456	→ 90°	271.0	312.0	7525.0	2,571 Climbing	FlightAware ADS-B (HND / RJTT)
Sun 01:56:46 PM	35.9194	140.3733	↘ 111°	292.0	336.0	8350.0	2,956 Climbing	FlightAware ADS-B (NRT / RJAA)
Sun 01:57:03 PM	35.9083	140.3973	↘ 126°	301.0	346.0	9200.0	2,802 Climbing	FlightAware ADS-B (NRT / RJAA)
Sun 01:57:39 PM	35.8791	140.447	↘ 125°	316.0	364.0	10825.0	1,977 Climbing	FlightAware ADS-B (HND / RJTT)
Sun 01:58:09 PM	35.8503	140.4965	↘ 126°	358.0	412.0	11375.0	1,625 Climbing	FlightAware ADS-B (HND / RJTT)
Sun 01:58:39 PM	35.8214	140.5455	↘ 126°	379.0	436.0	12450.0	2,425 Climbing	FlightAware ADS-B (HND / RJTT)
Sun 01:59:09 PM	35.7901	140.5979	↘ 126°	389.0	448.0	13800.0	2,311 Climbing	FlightAware ADS-B
Sun 01:59:40 PM	35.7559	140.6559	↘ 126°	410.0	472.0	14800.0	1,156 Climbing	FlightAware ADS-B (HND / RJTT)
Sun 02:00:10 PM	35.7219	140.7132	↘ 126°	411.0	473.0	14975.0	200 Climbing	FlightAware ADS-B (HND / RJTT)
Sun 02:00:40 PM	35.6888	140.7691	↘ 126°	409.0	471.0	15000.0	25 Climbing	FlightAware ADS-B (HND / RJTT)
Sun 02:01:10 PM	35.6551	140.8259	↘ 126°	407.0	468.0	15000.0	443 Climbing	FlightAware ADS-B (HND / RJTT)
Sun 02:01:41 PM	35.6212	140.8824	↘ 128°	411.0	473.0	15450.0	2,129 Climbing	FlightAware ADS-B (IBR / RJAH)
Sun 02:02:12 PM	35.5823	140.9415	↘ 129°	421.0	484.0	17200.0	3,418 Climbing	FlightAware ADS-B (HND / RJTT)
Sun 02:02:42 PM	35.545	140.9986	↘ 129°	430.0	495.0	18925.0	3,100 Climbing	FlightAware ADS-B (HND / RJTT)
Sun 02:03:12 PM	35.5076	141.0562	↘ 128°	443.0	510.0	20300.0	2,685 Climbing	FlightAware ADS-B (HND / RJTT)
Sun 02:03:44 PM	35.4668	141.119	↘ 128°	457.0	526.0	21700.0	2,468 Climbing	FlightAware ADS-B (NRT / RJAA)
Sun 02:04:14 PM	35.4275	141.1796	↘ 128°	471.0	542.0	22850.0	2,375 Climbing	FlightAware ADS-B (NRT / RJAA)
Sun 02:04:44 PM	35.3863	141.243	↘ 128°	481.0	554.0	24075.0	2,550 Climbing	FlightAware ADS-B (NRT / RJAA)
Sun 02:05:14 PM	35.3441	141.3079	↘ 129°	488.0	562.0	25400.0	2,600 Climbing	FlightAware ADS-B (NRT / RJAA)
Sun 02:05:44 PM	35.3009	141.3742	↘ 129°	495.0	570.0	26675.0	2,475 Climbing	FlightAware ADS-B (HND / RJTT)
Sun 02:06:14 PM	35.2581	141.4397	↘ 129°	502.0	578.0	27875.0	2,262 Climbing	FlightAware ADS-B (NRT / RJAA)
Sun 02:06:45 PM	35.2142	141.5064	↘ 129°	507.0	583.0	28975.0	1,943 Climbing	FlightAware ADS-B (OIM / RJTO)
Sun 02:07:15 PM	35.1709	141.5721	↘ 129°	518.0	596.0	29850.0	1,918 Climbing	FlightAware ADS-B (HND / RJTT)
Sun 02:07:46 PM	35.1203	141.649	↘ 129°	521.0	600.0	30925.0	2,119 Climbing	FlightAware ADS-B (NRT / RJAA)
Sun 02:08:18 PM	35.0752	141.7176	↘ 129°	519.0	597.0	32075.000000000004	1,863 Climbing	FlightAware ADS-B (RJTF)
Sun 02:08:48 PM	35.0287	141.7877	↘ 129°	531.0	611.0	32850.0	1,575 Climbing	FlightAware ADS-B (RJTF)
Sun 02:09:18 PM	34.9863	141.8516	↘ 129°	535.0	616.0	33650.0	1,650 Climbing	FlightAware ADS-B (RJTC)
Sun 02:09:48 PM	34.9354	141.9285	↘ 129°	538.0	619.0	34500.0	1,625 Climbing	FlightAware ADS-B (RJTF)
Sun 02:10:18 PM	34.8879	142.0	↘ 129°	539.0	620.0	35275.0	1,625 Climbing	FlightAware ADS-B (RJTF)
Sun 02:10:48 PM	34.8402	142.0714	↘ 129°	540.0	621.0	36125.0	1,150 Climbing	FlightAware ADS-B (RJTF)
Sun 02:11:18 PM	34.793	142.142	↘ 129°	550.0	633.0	36425.0	950 Climbing	FlightAware ADS-B (RJTF)
Sun 02:11:48 PM	34.7446	142.2143	↘ 129°	551.0	634.0	37075.0	1,375 Climbing	FlightAware ADS-B (FKS / RJSF)
Sun 02:12:18 PM	34.6966	142.2863	↘ 129°	547.0	629.0	37800.0	895 Climbing	FlightAware ADS-B (NJA / RJTA)
Sun 02:12:50 PM	34.6474	142.3594	↘ 129°	530.0	610.0	38000.0	190 Climbing	FlightAware ADS-B (NJA / RJTA)
Sun 02:13:21 PM	34.5979	142.4329	↘ 129°	530.0	610.0	38000.0	-25 Descending	FlightAware ADS-B (IBR / RJAH)
Sun 02:13:51 PM	34.5505	142.5029	↘ 129°	536.0	617.0	37975.0	Level	FlightAware ADS-B (HND / RJTT)
Sun 02:14:22 PM	34.5023	142.5741	↘ 129°	539.0	620.0	38000.0	49 Climbing	FlightAware ADS-B (HND / RJTT)
Sun 02:14:52 PM	34.4544	142.6447	↘ 129°	545.0	627.0	38025.0	Level	FlightAware ADS-B (HND / RJTT)
Sun 02:15:28 PM	34.398	142.7278	↘ 129°	539.0	620.0	38000.0	-45 Descending	FlightAware ADS-B (NJA / RJTA)
Sun 02:15:59 PM	34.3478	142.8016	↘ 129°	532.0	612.0	37975.0	Level	FlightAware ADS-B (NRT / RJAA)
Sun 02:16:29 PM	34.3023	142.8686	↘ 129°	529.0	609.0	38000.0	Level	FlightAware ADS-B (OKO / RJTY)
Sun 02:16:59 PM	34.256	142.9364	↘ 130°	526.0	605.0	37975.0	Level	FlightAware ADS-B (RJTF)
Sun 02:17:34 PM	34.2021	143.015	↘ 130°	524.0	603.0	38000.0	Level	FlightAware ADS-B (HND / RJTT)
Sun 02:18:09 PM	34.1488	143.0932	↘ 127°	528.0	608.0	37975.0	-21 Descending	FlightAware ADS-B (NJA / RJTA)
Sun 02:18:45 PM	34.1038	143.1893	↘ 112°	546.0	628.0	37975.0	22 Climbing	FlightAware ADS-B (IBR / RJAH)
Sun 02:19:17 PM	34.0756	143.2794	→ 110°	548.0	631.0	38000.0	41 Climbing	FlightAware ADS-B (NJA / RJTA)
Sun 02:19:58 PM	34.0415	143.3969	→ 109°	547.0	629.0	38025.0	Level	FlightAware ADS-B (NRT / RJAA)
Sun 02:21:15 PM	33.9769	143.6182	→ 109°	549.0	632.0	38000.0	-13 Descending	FlightAware ADS-B (HND / RJTT)
Sun 02:21:56 PM	33.9426	143.7348	→ 110°	550.0	633.0	38000.0	Level	FlightAware ADS-B (NRT / RJAA)
Sun 04:11:21 PM	32.1	165.0	→ 90°	607.0	699.0	38000.0	Level	Oakland Oceanic
Sun 04:13:08 PM	32.0991	165.427	→ 90°	607.0	699.0	38000.0	Level	FlightAware Transoceanic
Sun 04:15:06 PM	32.0971	165.8206	→ 90°	607.0	699.0	38000.0	Level	FlightAware Transoceanic
Sun 04:16:42 PM	32.1	166.1	→ 91°	601.0	692.0	38000.0	Level	Oakland Oceanic
Sun 04:19:38 PM	32.0933	166.641	→ 91°	601.0	692.0	38000.0	Level	FlightAware Transoceanic
Sun 04:21:35 PM	32.0868	167.0415	→ 91°	601.0	692.0	38000.0	Level	FlightAware Transoceanic
Sun 04:23:24 PM	32.0797	167.4146	→ 91°	601.0	692.0	38000.0	Level	FlightAware Transoceanic
Sun 04:24:38 PM	32.0742	167.6678	→ 92°	601.0	692.0	38000.0	Level	FlightAware Transoceanic
Sun 04:25:41 PM	32.0691	167.8834	→ 92°	601.0	692.0	38000.0	Level	FlightAware Transoceanic
Sun 04:26:26 PM	32.0667	168.0	→ 92°	598.0	688.0	38000.0	Level	Oakland Oceanic
Sun 04:28:54 PM	32.0506	168.5803	→ 92°	598.0	688.0	38000.0	Level	FlightAware Transoceanic
Sun 04:30:06 PM	32.0431	168.8203	→ 92°	598.0	688.0	38000.0	Level	FlightAware Transoceanic
Sun 04:31:50 PM	32.0316	169.167	→ 92°	598.0	688.0	38000.0	Level	FlightAware Transoceanic
Sun 04:33:13 PM	32.0217	169.4436	→ 92°	598.0	688.0	38000.0	Level	FlightAware Transoceanic
Sun 04:35:07 PM	32.0072	169.8235	→ 93°	598.0	688.0	38000.0	Level	FlightAware Transoceanic
Sun 04:35:54 PM	32.0	169.8833	→ 90°	582.0	670.0	38000.0	Level	Oakland Oceanic
Sun 04:36:36 PM	32.0	170.0	→ 94°	583.0	671.0	38000.0	Level	Oakland Oceanic
Sun 04:39:37 PM	31.9576	170.6757	→ 94°	583.0	671.0	38000.0	Level	FlightAware Transoceanic
Sun 04:41:41 PM	31.9317	171.0616	→ 95°	583.0	671.0	38000.0	Level	FlightAware Transoceanic
Sun 04:42:44 PM	31.9181	171.2575	→ 95°	583.0	671.0	38000.0	Level	FlightAware Transoceanic
Sun 04:44:36 PM	31.8932	171.6058	→ 95°	583.0	671.0	38000.0	361 Climbing	FlightAware Transoceanic
Sun 04:45:30 PM	31.8833	171.7	→ 95°	578.0	665.0	39000.0	286 Climbing	Oakland Oceanic
Sun 04:48:06 PM	31.8398	172.2764	→ 95°	578.0	665.0	39000.0	Level	FlightAware Transoceanic
Sun 04:50:07 PM	31.81	172.6511	→ 95°	578.0	665.0	39000.0	Level	FlightAware Transoceanic
Sun 04:51:16 PM	31.7926	172.8646	→ 96°	578.0	665.0	39000.0	Level	FlightAware Transoceanic
Sun 04:53:08 PM	31.7635	173.2111	→ 96°	578.0	665.0	39000.0	Level	FlightAware Transoceanic
Sun 04:55:07 PM	31.7333	173.5167	→ 96°	578.0	665.0	39000.0	Level	Oakland Oceanic
Sun 04:57:24 PM	31.6935	173.9646	→ 96°	578.0	665.0	39000.0	Level	FlightAware Transoceanic
Sun 04:59:38 PM	31.6551	174.3808	→ 96°	578.0	665.0	39000.0	Level	FlightAware Transoceanic
Sun 05:01:36 PM	31.6201	174.7469	→ 96°	578.0	665.0	39000.0	Level	FlightAware Transoceanic
Sun 05:03:52 PM	31.5785	175.1686	→ 97°	578.0	665.0	39000.0	Level	FlightAware Transoceanic
Sun 05:04:42 PM	31.5667	175.3167	→ 97°	577.0	664.0	39000.0	Level	Oakland Oceanic
Sun 05:06:37 PM	31.5352	175.6215	→ 97°	577.0	664.0	39000.0	Level	FlightAware Transoceanic
Sun 05:08:04 PM	31.5064	175.8944	→ 97°	577.0	664.0	39000.0	Level	FlightAware Transoceanic
Sun 05:09:08 PM	31.4848	176.095	→ 97°	577.0	664.0	39000.0	Level	FlightAware Transoceanic
Sun 05:12:14 PM	31.4202	176.6776	→ 98°	577.0	664.0	39000.0	Level	FlightAware Transoceanic
Sun 05:14:18 PM	31.3667	177.1167	→ 98°	578.0	665.0	39000.0	Level	Oakland Oceanic
Sun 05:14:24 PM	31.3736	177.0843	→ 98°	577.0	664.0	39000.0	Level	FlightAware Transoceanic
Sun 05:16:36 PM	31.3115	177.587	→ 98°	578.0	665.0	39000.0	Level	FlightAware Transoceanic
Sun 05:17:40 PM	31.2884	177.7796	→ 98°	578.0	665.0	39000.0	Level	FlightAware Transoceanic
Sun 05:19:38 PM	31.2449	178.1346	→ 98°	578.0	665.0	39000.0	Level	FlightAware Transoceanic
Sun 05:20:46 PM	31.2195	178.339	→ 98°	578.0	665.0	39000.0	Level	FlightAware Transoceanic
Sun 05:22:56 PM	31.1699	178.7294	→ 99°	578.0	665.0	39000.0	Level	FlightAware Transoceanic
Sun 05:23:54 PM	31.15	178.8833	→ 99°	569.0	655.0	39000.0	Level	Oakland Oceanic
Sun 05:24:01 PM	31.1446	178.9245	→ 99°	578.0	665.0	39000.0	Level	FlightAware Transoceanic
Sun 05:26:01 PM	31.1007	179.2588	→ 99°	569.0	655.0	39000.0	Level	FlightAware Transoceanic
Sun 05:28:04 PM	31.0494	179.6405	→ 99°	569.0	655.0	39000.0	Level	FlightAware Transoceanic
Sun 05:29:17 PM	31.0184	179.8668	→ 99°	569.0	655.0	39000.0	Level	FlightAware Transoceanic
Sun 05:30:13 PM	31.0	180.0	→ 107°	571.0	657.0	39000.0	Level	Oakland Oceanic
Sun 05:32:20 PM	30.8942	-179.5864	→ 107°	571.0	657.0	39000.0	Level	FlightAware Transoceanic
Sun 05:33:30 PM	30.85	-179.4	→ 107°	569.0	655.0	39000.0	Level	Oakland Oceanic
Sun 05:36:36 PM	30.6842	-178.7687	→ 107°	569.0	655.0	39000.0	Level	FlightAware Transoceanic
Sun 05:38:09 PM	30.6118	-178.4976	→ 107°	569.0	655.0	39000.0	Level	FlightAware Transoceanic
Sun 05:39:45 PM	30.5366	-178.2182	→ 107°	569.0	655.0	39000.0	Level	FlightAware Transoceanic
Sun 05:41:35 PM	30.4496	-177.8985	→ 108°	569.0	655.0	39000.0	Level	FlightAware Transoceanic
Sun 05:42:54 PM	30.3867	-177.6693	→ 108°	569.0	655.0	39000.0	Level	FlightAware Transoceanic
Sun 05:43:07 PM	30.4	-177.7167	→ 108°	567.0	652.0	39000.0	Level	Oakland Oceanic
Sun 05:45:49 PM	30.263	-177.2234	→ 108°	567.0	652.0	39000.0	Level	FlightAware Transoceanic
Sun 05:48:05 PM	30.1515	-176.8272	→ 108°	567.0	652.0	39000.0	Level	FlightAware Transoceanic
Sun 05:50:06 PM	30.0513	-176.4755	→ 108°	567.0	652.0	39000.0	Level	FlightAware Transoceanic
Sun 05:51:22 PM	29.9878	-176.255	→ 108°	567.0	652.0	39000.0	Level	FlightAware Transoceanic
Sun 05:52:42 PM	29.9333	-176.0667	→ 109°	572.0	658.0	39000.0	Level	Oakland Oceanic
Sun 05:55:05 PM	29.826	-175.6995	→ 109°	572.0	658.0	39000.0	Level	FlightAware Transoceanic
Sun 05:56:36 PM	29.7472	-175.4325	→ 109°	572.0	658.0	39000.0	Level	FlightAware Transoceanic
Sun 05:58:08 PM	29.667	-175.163	→ 109°	572.0	658.0	39000.0	Level	FlightAware Transoceanic
Sun 05:59:50 PM	29.5775	-174.8647	→ 109°	572.0	658.0	39000.0	Level	FlightAware Transoceanic
Sun 06:01:37 PM	29.4829	-174.5524	→ 109°	572.0	658.0	39000.0	405 Climbing	FlightAware Transoceanic
Sun 06:02:18 PM	29.4333	-174.4167	→ 109°	570.0	656.0	40000.0	288 Climbing	Oakland Oceanic
Sun 06:05:05 PM	29.2709	-173.8869	→ 109°	570.0	656.0	40000.0	Level	FlightAware Transoceanic
Sun 06:06:37 PM	29.1894	-173.6239	→ 110°	570.0	656.0	40000.0	Level	FlightAware Transoceanic
Sun 06:08:03 PM	29.1127	-173.3784	→ 110°	570.0	656.0	40000.0	Level	FlightAware Transoceanic
Sun 06:10:12 PM	28.9968	-173.0109	→ 110°	570.0	656.0	40000.0	Level	FlightAware Transoceanic
Sun 06:11:54 PM	28.9333	-172.7833	→ 110°	565.0	650.0	40000.0	Level	Oakland Oceanic
Sun 06:14:28 PM	28.7931	-172.3508	→ 110°	565.0	650.0	40000.0	Level	FlightAware Transoceanic
Sun 06:16:35 PM	28.6718	-171.9808	↘ 111°	565.0	650.0	40000.0	Level	FlightAware Transoceanic
Sun 06:18:49 PM	28.5426	-171.5913	↘ 111°	565.0	650.0	40000.0	Level	FlightAware Transoceanic
Sun 06:20:03 PM	28.4708	-171.3767	↘ 111°	565.0	650.0	40000.0	Level	FlightAware Transoceanic
Sun 06:21:31 PM	28.4	-171.1833	↘ 111°	558.0	642.0	40000.0	Level	Oakland Oceanic
Sun 06:25:07 PM	28.1954	-170.5731	↘ 111°	558.0	642.0	40000.0	Level	FlightAware Transoceanic
Sun 06:27:02 PM	28.0993	-170.29	↘ 111°	558.0	642.0	40000.0	Level	FlightAware Transoceanic
Sun 06:28:04 PM	28.0472	-170.1376	↘ 111°	558.0	642.0	40000.0	Level	FlightAware Transoceanic
Sun 06:28:45 PM	28.0	-170.0	↘ 111°	564.0	649.0	40000.0	Level	Oakland Oceanic
Sun 06:31:06 PM	27.8167	-169.6333	↘ 119°	562.0	647.0	40000.0	Level	Oakland Oceanic
Sun 06:33:07 PM	27.6575	-169.3063	↘ 119°	562.0	647.0	40000.0	Level	FlightAware Transoceanic
Sun 06:35:26 PM	27.4823	-168.9498	↘ 119°	562.0	647.0	40000.0	Level	FlightAware Transoceanic
Sun 06:36:36 PM	27.3938	-168.7707	↘ 119°	562.0	647.0	40000.0	Level	FlightAware Transoceanic
Sun 06:38:06 PM	27.2796	-168.5408	↘ 119°	562.0	647.0	40000.0	Level	FlightAware Transoceanic
Sun 06:39:38 PM	27.1625	-168.3064	↘ 119°	562.0	647.0	40000.0	Level	FlightAware Transoceanic
Sun 06:40:43 PM	27.1	-168.1833	↘ 119°	560.0	644.0	40000.0	Level	Oakland Oceanic
Sun 06:43:47 PM	26.8834	-167.7537	↘ 120°	560.0	644.0	40000.0	Level	FlightAware Transoceanic
Sun 06:45:06 PM	26.7804	-167.5513	↘ 120°	560.0	644.0	40000.0	Level	FlightAware Transoceanic
Sun 06:46:10 PM	26.6969	-167.3875	↘ 120°	560.0	644.0	40000.0	Level	FlightAware Transoceanic
Sun 06:48:04 PM	26.5475	-167.0964	↘ 120°	560.0	644.0	40000.0	Level	FlightAware Transoceanic
Sun 06:49:15 PM	26.4542	-166.9154	↘ 120°	560.0	644.0	40000.0	Level	FlightAware Transoceanic
Sun 06:50:26 PM	26.3667	-166.75	↘ 120°	559.0	643.0	40000.0	Level	Oakland Oceanic
Sun 06:53:07 PM	26.1218	-166.2801	↘ 120°	559.0	643.0	40000.0	Level	FlightAware Transoceanic
Sun 06:54:39 PM	26.0008	-166.0496	↘ 120°	559.0	643.0	40000.0	366 Climbing	FlightAware Transoceanic
Sun 06:55:51 PM	25.95	-165.95	↘ 120°	561.0	646.0	41000.0	759 Climbing	Oakland Oceanic
Sun 06:55:58 PM	25.95	-165.95	↘ 120°	559.0	643.0	41000.0	Level	Oakland Oceanic
Sun 06:58:44 PM	25.7352	-165.545	↘ 121°	559.0	643.0	41000.0	Level	FlightAware Transoceanic
Sun 06:59:54 PM	25.6667	-165.4	↘ 121°	559.0	643.0	41000.0	Level	Oakland Oceanic
Sun 07:02:33 PM	25.4618	-165.0198	↘ 121°	559.0	643.0	41000.0	Level	FlightAware Transoceanic
Sun 07:04:00 PM	25.3449	-164.8042	↘ 121°	559.0	643.0	41000.0	Level	FlightAware Transoceanic
Sun 07:05:06 PM	25.2559	-164.6409	↘ 121°	559.0	643.0	41000.0	Level	FlightAware Transoceanic
Sun 07:06:44 PM	25.1235	-164.3989	↘ 121°	559.0	643.0	41000.0	Level	FlightAware Transoceanic
Sun 07:08:20 PM	24.9935	-164.1624	↘ 121°	559.0	643.0	41000.0	Level	FlightAware Transoceanic
Sun 07:09:30 PM	24.9333	-164.05	↘ 121°	557.0	641.0	41000.0	Level	Oakland Oceanic
Sun 07:12:04 PM	24.6837	-163.6009	↘ 122°	557.0	641.0	41000.0	Level	FlightAware Transoceanic
Sun 07:13:06 PM	24.5993	-163.45	↘ 122°	557.0	641.0	41000.0	Level	FlightAware Transoceanic
Sun 07:16:36 PM	24.3123	-162.9404	↘ 122°	557.0	641.0	41000.0	Level	FlightAware Transoceanic
Sun 07:18:33 PM	24.1517	-162.6575	↘ 122°	557.0	641.0	41000.0	Level	FlightAware Transoceanic
Sun 07:18:47 PM	23.6	-163.1167	↘ 122°	590.0	679.0	41000.0	Level	Honolulu Center
Sun 07:19:47 PM	23.5167	-162.9833	↘ 124°	590.0	679.0	41000.0	Level	Honolulu Center
Sun 07:20:47 PM	23.4333	-162.8333	↘ 121°	550.0	633.0	41000.0	Level	Honolulu Center
Sun 07:21:47 PM	23.35	-162.7	↘ 124°	550.0	633.0	41000.0	Level	Honolulu Center
Sun 07:22:47 PM	23.2833	-162.55	↘ 116°	550.0	633.0	41000.0	Level	Honolulu Center
Sun 07:23:47 PM	23.2	-162.4167	↘ 124°	550.0	633.0	41000.0	Level	Honolulu Center
Sun 07:24:48 PM	23.1167	-162.2667	↘ 121°	550.0	633.0	41000.0	-13 Descending	Honolulu Center
Sun 07:25:42 PM	23.049	-162.1417	↘ 121°	552.0	635.0	40975.0	Level	FlightAware ADS-B (OGG / PHOG)
Sun 07:26:48 PM	22.95	-161.9833	↘ 121°	550.0	633.0	41000.0	12 Climbing	Honolulu Center
Sun 07:27:48 PM	22.8833	-161.85	↘ 119°	550.0	633.0	41000.0	Level	Honolulu Center
Sun 07:28:48 PM	22.8	-161.7	↘ 121°	550.0	633.0	41000.0	Level	Honolulu Center
Sun 07:29:48 PM	22.7167	-161.5667	↘ 124°	550.0	633.0	41000.0	Level	Honolulu Center
Sun 07:30:48 PM	22.6333	-161.4333	↘ 124°	540.0	621.0	41000.0	Level	Honolulu Center
Sun 07:31:48 PM	22.55	-161.2833	↘ 121°	550.0	633.0	41000.0	Level	Honolulu Center
Sun 07:32:29 PM	22.5046	-161.1893	↘ 122°	545.0	627.0	41000.0	Level	FlightAware ADS-B (PHNL)
Sun 07:33:23 PM	22.4331	-161.0655	↘ 122°	544.0	626.0	41000.0	Level	FlightAware ADS-B (OGG / PHOG)
Sun 07:33:53 PM	22.3925	-160.9952	↘ 122°	543.0	625.0	41000.0	Level	FlightAware ADS-B (OGG / PHOG)
Sun 07:34:24 PM	22.3511	-160.9237	↘ 122°	544.0	626.0	41000.0	-23 Descending	FlightAware ADS-B (PHNL)
Sun 07:34:59 PM	22.305	-160.8443	↘ 122°	542.0	624.0	40975.0	Level	FlightAware ADS-B (PHNL)
Sun 07:35:35 PM	22.2577	-160.763	↘ 122°	542.0	624.0	41000.0	22 Climbing	FlightAware ADS-B (PHNL)
Sun 07:36:08 PM	22.2127	-160.6857	↘ 122°	542.0	624.0	41000.0	Level	FlightAware ADS-B (PHNL)
Sun 07:36:39 PM	22.1726	-160.6168	↘ 122°	541.0	623.0	41000.0	Level	FlightAware ADS-B (PHNL)
Sun 07:37:09 PM	22.1319	-160.547	↘ 122°	541.0	623.0	41000.0	Level	FlightAware ADS-B (PHNL)
Sun 07:37:39 PM	22.0919	-160.4784	↘ 122°	540.0	621.0	41000.0	Level	FlightAware ADS-B (PHNL)
Sun 07:38:09 PM	22.0522	-160.4107	↘ 123°	540.0	621.0	41000.0	Level	FlightAware ADS-B (PHNL)
Sun 07:38:43 PM	22.0069	-160.3335	↘ 122°	539.0	620.0	41000.0	Level	FlightAware ADS-B (MUE / PHMU)
Sun 07:39:18 PM	21.9597	-160.2528	↘ 122°	539.0	620.0	41000.0	Level	FlightAware ADS-B (OGG / PHOG)
Sun 07:39:48 PM	21.9211	-160.1871	↘ 122°	540.0	621.0	41000.0	Level	FlightAware ADS-B (OGG / PHOG)
Sun 07:40:18 PM	21.8793	-160.116	↘ 122°	540.0	621.0	41000.0	Level	FlightAware ADS-B (OGG / PHOG)
Sun 07:40:48 PM	21.8396	-160.0486	↘ 122°	540.0	621.0	41000.0	Level	FlightAware ADS-B (OGG / PHOG)
Sun 07:41:18 PM	21.8	-159.9814	↘ 122°	541.0	623.0	41000.0	Level	FlightAware ADS-B (KOA / PHKO)
Sun 07:41:49 PM	21.7582	-159.9108	↘ 122°	541.0	623.0	41000.0	Level	FlightAware ADS-B (OGG / PHOG)
Sun 07:42:24 PM	21.7103	-159.8296	↘ 122°	543.0	625.0	41000.0	Level	FlightAware ADS-B (PHNL)
Sun 07:42:55 PM	21.669	-159.7598	↘ 122°	543.0	625.0	41000.0	Level	FlightAware ADS-B (LIH / PHLI)
Sun 07:43:25 PM	21.6291	-159.6925	↘ 122°	543.0	625.0	41000.0	Level	FlightAware ADS-B (PHNL)
Sun 07:43:55 PM	21.5887	-159.6247	↘ 122°	545.0	627.0	41000.0	Level	FlightAware ADS-B (PHNL)
Sun 07:44:25 PM	21.5479	-159.5559	↘ 123°	547.0	629.0	41000.0	Level	FlightAware ADS-B (PHNL)
Sun 07:44:55 PM	21.506	-159.4854	↘ 123°	547.0	629.0	41000.0	Level	FlightAware ADS-B (LIH / PHLI)
Sun 07:45:25 PM	21.466	-159.4185	↘ 123°	548.0	631.0	41000.0	Level	FlightAware ADS-B (PHNL)
Sun 07:45:55 PM	21.4249	-159.3495	↘ 122°	549.0	632.0	41000.0	Level	FlightAware ADS-B (PHNL)
Sun 07:46:25 PM	21.3832	-159.2796	↘ 123°	549.0	632.0	41000.0	Level	FlightAware ADS-B (PHNL)
Sun 07:46:55 PM	21.3423	-159.2112	↘ 123°	552.0	635.0	41000.0	Level	FlightAware ADS-B (PHNL)
Sun 07:47:25 PM	21.3016	-159.1433	↘ 123°	553.0	636.0	41000.0	Level	FlightAware ADS-B (PHNL)
Sun 07:47:55 PM	21.2595	-159.0731	↘ 123°	555.0	639.0	41000.0	Level	FlightAware ADS-B (LIH / PHLI)
Sun 07:48:25 PM	21.2177	-159.0033	↘ 123°	555.0	639.0	41000.0	Level	FlightAware ADS-B (LIH / PHLI)
Sun 07:48:57 PM	21.1745	-158.9315	↘ 123°	556.0	640.0	41000.0	Level	FlightAware ADS-B (PHIK)
Sun 07:49:33 PM	21.1228	-158.8456	↘ 123°	557.0	641.0	41000.0	Level	FlightAware ADS-B (PHIK)
Sun 07:50:03 PM	21.0818	-158.7776	↘ 123°	557.0	641.0	41000.0	Level	FlightAware ADS-B (LIH / PHLI)
Sun 07:50:34 PM	21.0386	-158.706	↘ 123°	557.0	641.0	41000.0	Level	FlightAware ADS-B (PHIK)
Sun 07:51:04 PM	20.9965	-158.6362	↘ 123°	559.0	643.0	41000.0	Level	FlightAware ADS-B (PHIK)
Sun 07:51:34 PM	20.9549	-158.5675	↘ 123°	560.0	644.0	41000.0	Level	FlightAware ADS-B (PHIK)
Sun 07:52:04 PM	20.9121	-158.497	↘ 123°	560.0	644.0	41000.0	Level	FlightAware ADS-B (PHIK)
Sun 07:52:34 PM	20.8695	-158.4266	↘ 123°	560.0	644.0	41000.0	-100 Descending	FlightAware ADS-B (PHIK)
Sun 07:53:04 PM	20.8272	-158.3569	↘ 123°	557.0	641.0	40900.0	-400 Descending	FlightAware ADS-B (PHHI)
Sun 07:53:34 PM	20.7857	-158.2888	↘ 123°	551.0	634.0	40600.0	-1,275 Descending	FlightAware ADS-B (PHHI)
Sun 07:54:04 PM	20.744	-158.2202	↘ 123°	546.0	628.0	39625.0	-2,425 Descending	FlightAware ADS-B (PHIK)
Sun 07:54:34 PM	20.703	-158.1527	↘ 123°	553.0	636.0	38175.0	-3,100 Descending	FlightAware ADS-B (OGG / PHOG)
Sun 07:55:04 PM	20.6605	-158.0832	↘ 123°	565.0	650.0	36525.0	-2,675 Descending	FlightAware ADS-B (KOA / PHKO)
Sun 07:55:34 PM	20.6181	-158.0136	↘ 123°	560.0	644.0	35500.0	-2,175 Descending	FlightAware ADS-B (KOA / PHKO)
Sun 07:56:04 PM	20.5754	-157.9439	↘ 123°	556.0	640.0	34350.0	-2,400 Descending	FlightAware ADS-B (PHNL)
Sun 07:56:34 PM	20.5336	-157.8765	↘ 123°	552.0	635.0	33100.0	-2,850 Descending	FlightAware ADS-B (PHNL)
Sun 07:57:04 PM	20.4906	-157.8066	↘ 123°	555.0	639.0	31500.0	-3,150 Descending	FlightAware ADS-B (KOA / PHKO)
Sun 07:57:34 PM	20.449	-157.7378	↘ 123°	560.0	644.0	29950.0	-2,575 Descending	FlightAware ADS-B (PHNL)
Sun 07:58:04 PM	20.4066	-157.6684	↘ 123°	546.0	628.0	28925.0	-2,100 Descending	FlightAware ADS-B (KOA / PHKO)
Sun 07:58:34 PM	20.3666	-157.6033	↘ 124°	537.0	618.0	27850.0	-2,275 Descending	FlightAware ADS-B (PHIK)
Sun 07:59:04 PM	20.3265	-157.5387	↘ 123°	530.0	610.0	26650.0	-2,275 Descending	FlightAware ADS-B (PHIK)
Sun 07:59:34 PM	20.2854	-157.4719	↘ 123°	520.0	598.0	25575.0	-1,925 Descending	FlightAware ADS-B (NGF / PHNG)
Sun 08:00:04 PM	20.2463	-157.4086	↘ 123°	503.0	579.0	24725.0	-1,725 Descending	FlightAware ADS-B (NGF / PHNG)
Sun 08:00:34 PM	20.2084	-157.3473	↘ 123°	488.0	562.0	23850.0	-1,825 Descending	FlightAware ADS-B (NGF / PHNG)
Sun 08:01:04 PM	20.1715	-157.2881	↘ 123°	476.0	548.0	22900.0	-1,943 Descending	FlightAware ADS-B (NGF / PHNG)
Sun 08:01:35 PM	20.1348	-157.2282	↘ 123°	465.0	535.0	21875.0	-1,943 Descending	FlightAware ADS-B (KOA / PHKO)
Sun 08:02:05 PM	20.0998	-157.1715	↘ 123°	454.0	522.0	20925.0	-1,725 Descending	FlightAware ADS-B (KOA / PHKO)
Sun 08:02:35 PM	20.0655	-157.1163	↘ 124°	439.0	505.0	20150.0	-1,430 Descending	FlightAware ADS-B (KOA / PHKO)
Sun 08:03:09 PM	20.0286	-157.0572	↘ 123°	420.0	483.0	19400.0	-1,336 Descending	FlightAware ADS-B (KOA / PHKO)
Sun 08:03:39 PM	19.9973	-157.0069	↘ 123°	407.0	468.0	18725.0	-1,352 Descending	FlightAware ADS-B (KOA / PHKO)
Sun 08:04:10 PM	19.9658	-156.9562	↘ 124°	394.0	453.0	18025.0	-1,328 Descending	FlightAware ADS-B (KOA / PHKO)
Sun 08:04:40 PM	19.9358	-156.9086	↘ 123°	379.0	436.0	17375.0	-1,575 Descending	FlightAware ADS-B (KOA / PHKO)
Sun 08:05:10 PM	19.9067	-156.8616	↘ 123°	375.0	432.0	16450.0	-1,750 Descending	FlightAware ADS-B (KOA / PHKO)
Sun 08:05:40 PM	19.8786	-156.8168	↘ 124°	370.0	426.0	15625.0	-1,648 Descending	FlightAware ADS-B (OGG / PHOG)
Sun 08:06:11 PM	19.8493	-156.7695	↘ 123°	363.0	418.0	14775.0	-1,598 Descending	FlightAware ADS-B (KOA / PHKO)
Sun 08:06:41 PM	19.8216	-156.725	↘ 123°	358.0	412.0	14000.0	-1,675 Descending	FlightAware ADS-B (MUE / PHMU)
Sun 08:07:11 PM	19.7941	-156.6812	↘ 123°	353.0	406.0	13100.0	-1,725 Descending	FlightAware ADS-B (KOA / PHKO)
Sun 08:07:41 PM	19.7671	-156.6382	↘ 124°	348.0	400.0	12275.0	-1,598 Descending	FlightAware ADS-B (PHNL)
Sun 08:08:12 PM	19.74	-156.595	↘ 123°	340.0	391.0	11475.0	-1,549 Descending	FlightAware ADS-B (KOA / PHKO)
Sun 08:08:42 PM	19.7145	-156.5544	↘ 123°	334.0	384.0	10700.0	-1,375 Descending	FlightAware ADS-B (KOA / PHKO)
Sun 08:09:12 PM	19.6893	-156.5138	↘ 123°	313.0	360.0	10100.0	-837 Descending	FlightAware ADS-B (OGG / PHOG)
Sun 08:09:34 PM	19.6722	-156.4864	↘ 123°	289.0	333.0	9975.0	-1,302 Descending	FlightAware ADS-B (KOA / PHKO)
Sun 08:10:05 PM	19.6491	-156.4499	↘ 124°	293.0	337.0	8950.0	-1,549 Descending	FlightAware ADS-B (KOA / PHKO)
Sun 08:10:35 PM	19.6273	-156.4152	↘ 124°	283.0	326.0	8400.0	-1,200 Descending	FlightAware ADS-B (KOA / PHKO)
Sun 08:11:05 PM	19.6055	-156.3803	↘ 123°	281.0	323.0	7750.0	-1,300 Descending	FlightAware ADS-B (KOA / PHKO)
Sun 08:11:35 PM	19.5839	-156.3458	↘ 124°	280.0	322.0	7100.0	-1,275 Descending	FlightAware ADS-B (KOA / PHKO)
Sun 08:12:05 PM	19.5623	-156.3116	↘ 124°	277.0	319.0	6475.0	-1,217 Descending	FlightAware ADS-B (KOA / PHKO)
Sun 08:12:28 PM	19.5457	-156.2844	↘ 118°	265.0	305.0	6025.0	-1,143 Descending	FlightAware ADS-B (MUE / PHMU)
Sun 08:12:47 PM	19.5395	-156.2637	→ 100°	251.0	289.0	5675.0	-1,224 Descending	FlightAware ADS-B (OGG / PHOG)
Sun 08:13:17 PM	19.5356	-156.2262	→ 95°	251.0	289.0	5025.0	-1,225 Descending	FlightAware ADS-B (OGG / PHOG)
Sun 08:13:47 PM	19.5329	-156.1903	→ 94°	249.0	287.0	4450.0	-1,175 Descending	FlightAware ADS-B (OGG / PHOG)
Sun 08:14:17 PM	19.5303	-156.1542	→ 94°	248.0	285.0	3850.0	-833 Descending	FlightAware ADS-B (OGG / PHOG)
Sun 08:14:50 PM	19.5273	-156.1154	→ 95°	227.0	261.0	3575.0	-429 Descending	FlightAware ADS-B (KOA / PHKO)
Sun 08:15:06 PM	19.5259	-156.0974	→ 95°	215.0	247.0	3500.0	-309 Descending	FlightAware ADS-B (OGG / PHOG)
Sun 08:15:24 PM	19.5282	-156.0797	→ 69°	204.0	235.0	3400.0	-485 Descending	FlightAware ADS-B (KOA / PHKO)
Sun 08:15:40 PM	19.5368	-156.0673	↗ 39°	198.0	228.0	3225.0	-955 Descending	FlightAware ADS-B (KOA / PHKO)
Sun 08:15:57 PM	19.5518	-156.0619	↑ 6°	200.0	230.0	2875.0	-988 Descending	FlightAware ADS-B (KOA / PHKO)
Sun 08:16:21 PM	19.5733	-156.0593	↑ 5°	193.0	222.0	2550.0	-1,009 Descending	FlightAware ADS-B (OGG / PHOG)
Sun 08:16:52 PM	19.601	-156.0573	↑ 5°	191.0	220.0	1950.0	-959 Descending	FlightAware ADS-B (KOA / PHKO)
Sun 08:17:22 PM	19.6262	-156.0553	↑ 4°	175.0	201.0	1575.0	-606 Descending	FlightAware ADS-B (KOA / PHKO)
Sun 08:17:39 PM	19.6399	-156.0543	↑ 4°	161.0	185.0	1475.0	-415 Descending	FlightAware ADS-B (KOA / PHKO)
Sun 08:18:09 PM	19.661	-156.0524	↑ 5°	148.0	170.0	1250.0	-457 Descending	FlightAware ADS-B (KOA / PHKO)
Sun 08:18:25 PM	19.6711	-156.0516	↑ 4°	138.0	159.0	1125.0	-583 Descending	FlightAware ADS-B (OGG / PHOG)
Sun 08:18:45 PM	19.6838	-156.0505	↑ 6°	132.0	152.0	900.0	-667 Descending	FlightAware ADS-B (KOA / PHKO)
Sun 08:19:01 PM	19.6936	-156.0496	↑ 6°	134.0	154.0	725.0	-750 Descending	FlightAware ADS-B (KOA / PHKO)
Sun 08:19:17 PM	19.7028	-156.0489	↑ 5°	128.0	147.0	500.0	-844 Descending	FlightAware ADS-B (KOA / PHKO)
