# Supplementary material for: TrackMatcher – a tool for finding intercepts in tracks of geographical positions
Source: Copernicus journal article supplement (doi:10.5194/gmd-15-7557-2022), 2022-10-18
Supplement: Supplementary file 1 [file gmd-15-7557-2022-supplement.zip › ESM/example/data/flights/JAL779_26-JAN-2019_PHKO-RJAA.dat]

Time (CET)	Latitude	Longitude	Course	kts	mph	feet	Rate	Reporting Facility
Sat 10:35:00 PM	19.7622	-156.0449	↑ 348°	169.0	194.0	1250.0	Level	FlightAware ADS-B (KOA / PHKO)
Sat 10:35:16 PM	19.7725	-156.0505	↖ 319°	188.0	216.0	1625.0	1,641 Climbing	FlightAware ADS-B (OGG / PHOG)
Sat 10:35:32 PM	19.7831	-156.0634	← 308°	202.0	232.0	2125.0	1,773 Climbing	FlightAware ADS-B (KOA / PHKO)
Sat 10:35:49 PM	19.792	-156.0757	← 308°	212.0	244.0	2600.0	1,625 Climbing	FlightAware ADS-B (OGG / PHOG)
Sat 10:36:08 PM	19.8039	-156.0918	← 309°	231.0	266.0	3100.0	1,967 Climbing	FlightAware ADS-B (KOA / PHKO)
Sat 10:36:34 PM	19.823	-156.1162	← 312°	244.0	281.0	4075.0	2,152 Climbing	FlightAware ADS-B (KOA / PHKO)
Sat 10:36:54 PM	19.8387	-156.1363	← 304°	263.0	303.0	4750.0	2,270 Climbing	FlightAware ADS-B (KOA / PHKO)
Sat 10:37:11 PM	19.8457	-156.1556	← 282°	266.0	306.0	5475.0	2,514 Climbing	FlightAware ADS-B (KOA / PHKO)
Sat 10:37:31 PM	19.85	-156.1801	← 281°	272.0	313.0	6300.0	2,420 Climbing	FlightAware ADS-B (OGG / PHOG)
Sat 10:37:55 PM	19.8564	-156.2144	← 281°	288.0	331.0	7250.0	2,250 Climbing	FlightAware ADS-B (OGG / PHOG)
Sat 10:38:17 PM	19.8622	-156.2442	← 283°	297.0	342.0	8025.0	2,521 Climbing	FlightAware ADS-B (OGG / PHOG)
Sat 10:38:42 PM	19.8696	-156.2812	← 282°	304.0	350.0	9225.0	2,820 Climbing	FlightAware ADS-B (KOA / PHKO)
Sat 10:39:07 PM	19.8767	-156.3181	← 283°	311.0	358.0	10375.0	2,591 Climbing	FlightAware ADS-B (OGG / PHOG)
Sat 10:39:37 PM	19.8856	-156.364	← 282°	323.0	372.0	11600.0	2,350 Climbing	FlightAware ADS-B (OGG / PHOG)
Sat 10:40:07 PM	19.8949	-156.4138	← 281°	341.0	392.0	12725.0	2,500 Climbing	FlightAware ADS-B (OGG / PHOG)
Sat 10:40:37 PM	19.9037	-156.4613	← 281°	344.0	396.0	14100.0	2,828 Climbing	FlightAware ADS-B (KOA / PHKO)
Sat 10:41:08 PM	19.9135	-156.5123	← 281°	347.0	399.0	15600.0	2,730 Climbing	FlightAware ADS-B (KOA / PHKO)
Sat 10:41:38 PM	19.9231	-156.5636	← 282°	353.0	406.0	16875.0	2,563 Climbing	FlightAware ADS-B (OGG / PHOG)
Sat 10:41:56 PM	19.9289	-156.5939	← 283°	353.0	406.0	17650.0	2,531 Climbing	FlightAware ADS-B (PHNL)
Sat 10:42:26 PM	19.9389	-156.647	← 281°	363.0	418.0	18900.0	2,400 Climbing	FlightAware ADS-B (KOA / PHKO)
Sat 10:42:56 PM	19.9489	-156.6995	← 281°	368.0	423.0	20050.0	2,125 Climbing	FlightAware ADS-B (KOA / PHKO)
Sat 10:43:26 PM	19.9591	-156.7534	← 281°	379.0	436.0	21025.0	1,975 Climbing	FlightAware ADS-B (OGG / PHOG)
Sat 10:43:56 PM	19.9695	-156.8082	← 281°	384.0	442.0	22025.0	2,100 Climbing	FlightAware ADS-B (OGG / PHOG)
Sat 10:44:26 PM	19.98	-156.8645	← 281°	388.0	447.0	23125.0	2,050 Climbing	FlightAware ADS-B (KOA / PHKO)
Sat 10:44:56 PM	19.9904	-156.9203	← 281°	394.0	453.0	24075.0	1,775 Climbing	FlightAware ADS-B (KOA / PHKO)
Sat 10:45:26 PM	20.0013	-156.9785	← 281°	403.0	464.0	24900.0	1,700 Climbing	FlightAware ADS-B (KOA / PHKO)
Sat 10:45:56 PM	20.0117	-157.0342	← 281°	408.0	470.0	25775.0	1,795 Climbing	FlightAware ADS-B (KOA / PHKO)
Sat 10:46:27 PM	20.0233	-157.0964	← 281°	413.0	475.0	26725.0	2,034 Climbing	FlightAware ADS-B (KOA / PHKO)
Sat 10:46:55 PM	20.0337	-157.1522	← 281°	408.0	470.0	27775.0	2,560 Climbing	FlightAware ADS-B (PHHI)
Sat 10:47:25 PM	20.0439	-157.2089	← 281°	362.0	417.0	29200.0	2,400 Climbing	FlightAware ADS-B (PHNL)
Sat 10:47:45 PM	20.0504	-157.2425	← 282°	361.0	415.0	29775.0	930 Climbing	FlightAware ADS-B (MUE / PHMU)
Sat 10:48:15 PM	20.0607	-157.2962	← 282°	377.0	434.0	29975.0	350 Climbing	FlightAware ADS-B (PHHI)
Sat 10:48:45 PM	20.0712	-157.3527	← 282°	395.0	455.0	30125.0	529 Climbing	FlightAware ADS-B (MUE / PHMU)
Sat 10:49:06 PM	20.0786	-157.3931	← 282°	400.0	460.0	30425.0	1,033 Climbing	FlightAware ADS-B (MUE / PHMU)
Sat 10:49:46 PM	20.0927	-157.4712	← 282°	405.0	466.0	31175.0	1,141 Climbing	FlightAware ADS-B (MUE / PHMU)
Sat 10:50:17 PM	20.1037	-157.5317	← 282°	407.0	468.0	31775.0	1,113 Climbing	FlightAware ADS-B (MUE / PHMU)
Sat 10:50:48 PM	20.1147	-157.5914	← 282°	409.0	471.0	32325.000000000004	1,324 Climbing	FlightAware ADS-B (MUE / PHMU)
Sat 10:51:08 PM	20.1221	-157.6315	← 281°	405.0	466.0	32900.0	1,793 Climbing	FlightAware ADS-B (MUE / PHMU)
Sat 10:51:29 PM	20.1296	-157.6727	← 281°	401.0	461.0	33550.0	1,294 Climbing	FlightAware ADS-B (KOA / PHKO)
Sat 10:51:59 PM	20.1402	-157.7305	← 281°	401.0	461.0	34000.0	425 Climbing	FlightAware ADS-B (KOA / PHKO)
Sat 10:52:29 PM	20.1505	-157.7871	← 282°	401.0	461.0	33975.0	-25 Descending	FlightAware ADS-B (MUE / PHMU)
Sat 10:52:59 PM	20.1614	-157.8467	← 281°	402.0	463.0	33975.0	Level	FlightAware ADS-B (NGF / PHNG)
Sat 10:53:29 PM	20.172	-157.9048	← 281°	401.0	461.0	33975.0	25 Climbing	FlightAware ADS-B (KOA / PHKO)
Sat 10:54:00 PM	20.1827	-157.964	← 282°	401.0	461.0	34000.0	25 Climbing	FlightAware ADS-B (MUE / PHMU)
Sat 10:54:30 PM	20.1932	-158.0219	← 282°	401.0	461.0	34000.0	Level	FlightAware ADS-B (MUE / PHMU)
Sat 10:55:00 PM	20.2036	-158.0796	← 282°	401.0	461.0	34000.0	Level	FlightAware ADS-B (MUE / PHMU)
Sat 10:55:31 PM	20.2143	-158.1391	← 282°	402.0	463.0	34000.0	Level	FlightAware ADS-B (MUE / PHMU)
Sat 10:56:02 PM	20.2255	-158.2012	← 281°	402.0	463.0	34000.0	Level	FlightAware ADS-B (PHIK)
Sat 10:56:32 PM	20.2359	-158.2596	← 281°	402.0	463.0	34000.0	Level	FlightAware ADS-B (PHNL)
Sat 10:57:01 PM	20.2457	-158.3142	← 282°	401.0	461.0	34000.0	Level	FlightAware ADS-B (MUE / PHMU)
Sat 10:57:31 PM	20.2564	-158.3736	← 281°	402.0	463.0	34000.0	Level	FlightAware ADS-B (PHIK)
Sat 10:58:02 PM	20.2672	-158.4347	← 281°	403.0	464.0	34000.0	Level	FlightAware ADS-B (PHNL)
Sat 10:58:32 PM	20.2776	-158.4928	← 281°	403.0	464.0	34000.0	Level	FlightAware ADS-B (PHIK)
Sat 10:59:02 PM	20.2877	-158.5499	← 282°	403.0	464.0	34000.0	Level	FlightAware ADS-B (MUE / PHMU)
Sat 10:59:32 PM	20.2982	-158.609	← 281°	403.0	464.0	34000.0	Level	FlightAware ADS-B (PHIK)
Sat 11:00:02 PM	20.3087	-158.6682	← 282°	402.0	463.0	34000.0	Level	FlightAware ADS-B (MUE / PHMU)
Sat 11:00:32 PM	20.3187	-158.7251	← 281°	403.0	464.0	34000.0	Level	FlightAware ADS-B (PHNL)
Sat 11:01:03 PM	20.3296	-158.7873	← 281°	403.0	464.0	34000.0	Level	FlightAware ADS-B (PHNL)
Sat 11:01:33 PM	20.3398	-158.845	← 282°	403.0	464.0	34000.0	Level	FlightAware ADS-B (MUE / PHMU)
Sat 11:02:03 PM	20.3501	-158.9034	← 282°	403.0	464.0	34000.0	Level	FlightAware ADS-B (MUE / PHMU)
Sat 11:02:33 PM	20.3606	-158.9638	← 281°	404.0	465.0	34000.0	Level	FlightAware ADS-B (PHNL)
Sat 11:03:03 PM	20.371	-159.0229	← 280°	404.0	465.0	34000.0	Level	FlightAware ADS-B (PHNL)
Sat 11:03:33 PM	20.3811	-159.0815	← 280°	404.0	465.0	34000.0	Level	FlightAware ADS-B (PHNL)
Sat 11:04:03 PM	20.3913	-159.1396	← 280°	404.0	465.0	34000.0	Level	FlightAware ADS-B (PHNL)
Sat 11:04:33 PM	20.4016	-159.1988	← 280°	404.0	465.0	34000.0	Level	FlightAware ADS-B (PHNL)
Sat 11:05:03 PM	20.4117	-159.2576	← 280°	404.0	465.0	34000.0	Level	FlightAware ADS-B (PHNL)
Sat 11:05:33 PM	20.4213	-159.313	← 280°	404.0	465.0	34000.0	Level	FlightAware ADS-B (PHNL)
Sat 11:06:04 PM	20.4316	-159.373	← 280°	404.0	465.0	34000.0	Level	FlightAware ADS-B (PHNL)
Sat 11:06:34 PM	20.442	-159.433	← 281°	403.0	464.0	34000.0	Level	FlightAware ADS-B (OGG / PHOG)
Sat 11:07:04 PM	20.4517	-159.4897	← 280°	404.0	465.0	34000.0	Level	FlightAware ADS-B (PHNL)
Sat 11:07:35 PM	20.4624	-159.5513	← 281°	403.0	464.0	34000.0	Level	FlightAware ADS-B (OGG / PHOG)
Sat 11:08:05 PM	20.4726	-159.6115	← 281°	403.0	464.0	34000.0	Level	FlightAware ADS-B (OGG / PHOG)
Sat 11:08:35 PM	20.4828	-159.6704	← 281°	404.0	465.0	34000.0	Level	FlightAware ADS-B (OGG / PHOG)
Sat 11:09:05 PM	20.4928	-159.7293	← 281°	404.0	465.0	34000.0	Level	FlightAware ADS-B (OGG / PHOG)
Sat 11:09:36 PM	20.5024	-159.786	← 281°	404.0	465.0	34000.0	Level	FlightAware ADS-B (OGG / PHOG)
Sat 11:10:06 PM	20.5127	-159.8469	← 281°	404.0	465.0	34000.0	Level	FlightAware ADS-B (OGG / PHOG)
Sat 11:10:36 PM	20.5227	-159.906	← 281°	404.0	465.0	34000.0	Level	FlightAware ADS-B (OGG / PHOG)
Sat 11:11:06 PM	20.5328	-159.9656	← 281°	405.0	466.0	34000.0	Level	FlightAware ADS-B (OGG / PHOG)
Sat 11:11:36 PM	20.5427	-160.0245	← 281°	405.0	466.0	34000.0	Level	FlightAware ADS-B (OGG / PHOG)
Sat 11:12:06 PM	20.5527	-160.084	← 281°	405.0	466.0	34000.0	Level	FlightAware ADS-B (OGG / PHOG)
Sat 11:12:36 PM	20.5622	-160.1411	← 281°	405.0	466.0	34000.0	Level	FlightAware ADS-B (OGG / PHOG)
Sat 11:13:06 PM	20.5719	-160.1982	← 281°	404.0	465.0	34000.0	Level	FlightAware ADS-B (OGG / PHOG)
Sat 11:13:36 PM	20.5824	-160.2607	← 281°	404.0	465.0	34000.0	Level	FlightAware ADS-B (OGG / PHOG)
Sat 11:14:06 PM	20.5918	-160.3176	← 281°	404.0	465.0	34000.0	Level	FlightAware ADS-B (OGG / PHOG)
Sat 11:14:37 PM	20.6021	-160.3794	← 281°	404.0	465.0	34000.0	Level	FlightAware ADS-B (OGG / PHOG)
Sat 11:15:07 PM	20.6119	-160.4385	← 281°	404.0	465.0	34000.0	Level	FlightAware ADS-B (OGG / PHOG)
Sat 11:15:37 PM	20.6217	-160.4973	← 281°	405.0	466.0	34000.0	Level	FlightAware ADS-B (OGG / PHOG)
Sat 11:16:07 PM	20.6314	-160.5565	← 281°	405.0	466.0	34000.0	Level	FlightAware ADS-B (OGG / PHOG)
Sat 11:16:38 PM	20.6412	-160.6161	← 281°	405.0	466.0	34000.0	Level	FlightAware ADS-B (OGG / PHOG)
Sat 11:17:08 PM	20.6508	-160.6745	← 281°	406.0	467.0	34000.0	Level	FlightAware ADS-B (OGG / PHOG)
Sat 11:17:38 PM	20.6606	-160.7336	← 281°	407.0	468.0	34000.0	Level	FlightAware ADS-B (OGG / PHOG)
Sat 11:18:08 PM	20.6706	-160.7946	← 281°	407.0	468.0	34000.0	-24 Descending	FlightAware ADS-B (OGG / PHOG)
Sat 11:18:41 PM	20.6813	-160.8605	← 280°	405.0	466.0	33975.0	Level	FlightAware ADS-B (PHNL)
Sat 11:19:11 PM	20.6909	-160.9192	← 280°	405.0	466.0	34000.0	25 Climbing	FlightAware ADS-B (PHNL)
Sat 11:19:42 PM	20.7007	-160.9791	← 280°	405.0	466.0	34000.0	Level	FlightAware ADS-B (PHNL)
Sat 11:20:12 PM	20.7103	-161.0384	← 280°	406.0	467.0	34000.0	Level	FlightAware ADS-B (PHNL)
Sat 11:20:42 PM	20.7199	-161.0975	← 280°	406.0	467.0	34000.0	Level	FlightAware ADS-B (PHNL)
Sat 11:21:12 PM	20.7294	-161.1562	← 280°	406.0	467.0	34000.0	Level	FlightAware ADS-B (PHNL)
Sat 11:21:42 PM	20.7391	-161.2166	← 280°	406.0	467.0	34000.0	Level	FlightAware ADS-B (PHNL)
Sat 11:22:12 PM	20.7485	-161.275	← 280°	406.0	467.0	34000.0	Level	FlightAware ADS-B (PHNL)
Sat 11:22:42 PM	20.7577	-161.3329	← 280°	407.0	468.0	34000.0	Level	FlightAware ADS-B (PHNL)
Sat 11:23:33 PM	20.7746	-161.4376	← 280°	407.0	468.0	34000.0	Level	FlightAware ADS-B (PHNL)
Sat 11:24:03 PM	20.7838	-161.4957	← 280°	407.0	468.0	34000.0	Level	FlightAware ADS-B (PHNL)
Sat 11:24:33 PM	20.7933	-161.5551	← 280°	407.0	468.0	34000.0	Level	FlightAware ADS-B (PHNL)
Sat 11:25:03 PM	20.8027	-161.6144	← 280°	407.0	468.0	34000.0	Level	FlightAware ADS-B (PHNL)
Sat 11:25:54 PM	20.8184	-161.714	← 280°	408.0	470.0	34000.0	Level	FlightAware ADS-B (PHNL)
Sat 11:26:32 PM	20.8302	-161.7883	← 280°	408.0	470.0	34000.0	Level	FlightAware ADS-B (PHNL)
Sat 11:27:04 PM	20.8405	-161.8536	← 280°	407.0	468.0	34000.0	Level	FlightAware ADS-B (PHNL)
Sat 11:27:34 PM	20.8497	-161.9126	← 280°	408.0	470.0	34000.0	Level	FlightAware ADS-B (PHNL)
Sat 11:28:04 PM	20.8587	-161.9696	← 280°	408.0	470.0	34000.0	Level	FlightAware ADS-B (PHNL)
Sat 11:29:23 PM	20.8832	-162.127	← 280°	406.0	467.0	34000.0	Level	FlightAware ADS-B (OGG / PHOG)
Sat 11:29:53 PM	20.8923	-162.1861	← 280°	406.0	467.0	34000.0	Level	FlightAware ADS-B (OGG / PHOG)
Sat 11:30:23 PM	20.9018	-162.2474	← 280°	406.0	467.0	34000.0	Level	FlightAware ADS-B (OGG / PHOG)
Sat 11:31:23 PM	20.9203	-162.3667	← 280°	407.0	468.0	34000.0	Level	FlightAware ADS-B (OGG / PHOG)
Sat 11:31:54 PM	20.9296	-162.4269	← 280°	407.0	468.0	34000.0	Level	FlightAware ADS-B (OGG / PHOG)
Sat 11:32:24 PM	20.9387	-162.4871	← 280°	407.0	468.0	34000.0	Level	FlightAware ADS-B (OGG / PHOG)
Sat 11:32:54 PM	20.9475	-162.5446	← 280°	407.0	468.0	34000.0	Level	FlightAware ADS-B (OGG / PHOG)
Sat 11:33:58 PM	20.95	-162.65	← 280°	410.0	472.0	34000.0	Level	Honolulu Center
Sat 11:34:58 PM	20.9667	-162.7667	← 279°	410.0	472.0	34000.0	Level	Honolulu Center
Sat 11:35:58 PM	21.0	-162.8833	← 287°	410.0	472.0	34000.0	Level	Honolulu Center
Sat 11:36:58 PM	21.0167	-163.0167	← 278°	410.0	472.0	34000.0	Level	Honolulu Center
Sat 11:37:58 PM	21.0333	-163.1333	← 279°	410.0	472.0	34000.0	Level	Honolulu Center
Sat 11:38:58 PM	21.05	-163.25	← 279°	390.0	449.0	34000.0	Level	Honolulu Center
Sat 11:40:08 PM	21.0667	-163.3833	← 278°	380.0	437.0	34000.0	Level	Honolulu Center
Sat 11:41:08 PM	21.1	-163.5167	← 285°	430.0	495.0	34000.0	Level	Honolulu Center
Sat 11:42:09 PM	21.1	-163.6333	← 270°	410.0	472.0	34000.0	Level	Honolulu Center
Sat 11:47:30 PM	21.15	-164.2833	← 269°	418.0	481.0	34000.0	Level	Oakland Oceanic
Sat 11:50:12 PM	21.1458	-164.681	← 269°	418.0	481.0	34000.0	Level	FlightAware Transoceanic
Sat 11:51:39 PM	21.1436	-164.8613	← 269°	418.0	481.0	34000.0	Level	FlightAware Transoceanic
Sat 11:53:07 PM	21.1411	-165.0438	← 269°	418.0	481.0	34000.0	Level	FlightAware Transoceanic
Sat 11:55:08 PM	21.1374	-165.2946	← 269°	418.0	481.0	34000.0	Level	FlightAware Transoceanic
Sat 11:56:36 PM	21.1345	-165.4769	← 269°	418.0	481.0	34000.0	Level	FlightAware Transoceanic
Sat 11:57:06 PM	21.1333	-165.4833	← 269°	418.0	481.0	34000.0	Level	Oakland Oceanic
Sat 11:59:40 PM	21.1275	-165.8178	← 269°	418.0	481.0	34000.0	Level	FlightAware Transoceanic
Sun 12:00:56 AM	21.1246	-165.9769	← 269°	418.0	481.0	34000.0	Level	FlightAware Transoceanic
Sun 12:03:11 AM	21.1189	-166.2594	← 269°	418.0	481.0	34000.0	Level	FlightAware Transoceanic
Sun 12:05:06 AM	21.1137	-166.5	← 269°	418.0	481.0	34000.0	Level	FlightAware Transoceanic
Sun 12:06:42 AM	21.1167	-166.6667	← 268°	416.0	479.0	34000.0	Level	Oakland Oceanic
Sun 12:08:35 AM	21.1117	-166.8626	← 268°	416.0	479.0	34000.0	Level	FlightAware Transoceanic
Sun 12:10:05 AM	21.1067	-167.0479	← 268°	416.0	479.0	34000.0	Level	FlightAware Transoceanic
Sun 12:11:16 AM	21.1026	-167.194	← 268°	416.0	479.0	34000.0	Level	FlightAware Transoceanic
Sun 12:13:07 AM	21.096	-167.4225	← 268°	416.0	479.0	34000.0	Level	FlightAware Transoceanic
Sun 12:15:07 AM	21.0885	-167.6695	← 268°	416.0	479.0	34000.0	Level	FlightAware Transoceanic
Sun 12:16:19 AM	21.0833	-167.85	← 268°	419.0	482.0	34000.0	Level	Oakland Oceanic
Sun 12:18:16 AM	21.0738	-168.1368	← 268°	419.0	482.0	34000.0	Level	FlightAware Transoceanic
Sun 12:19:41 AM	21.0676	-168.316	← 268°	419.0	482.0	34000.0	Level	FlightAware Transoceanic
Sun 12:20:50 AM	21.0624	-168.4615	← 268°	419.0	482.0	34000.0	Level	FlightAware Transoceanic
Sun 12:21:57 AM	21.0572	-168.6028	← 268°	419.0	482.0	34000.0	Level	FlightAware Transoceanic
Sun 12:23:09 AM	21.0516	-168.7546	← 268°	419.0	482.0	34000.0	Level	FlightAware Transoceanic
Sun 12:25:06 AM	21.0421	-169.0012	← 268°	419.0	482.0	34000.0	Level	FlightAware Transoceanic
Sun 12:25:54 AM	21.0333	-169.0667	← 268°	424.0	488.0	34000.0	Level	Oakland Oceanic
Sun 12:28:06 AM	21.0238	-169.3469	← 268°	424.0	488.0	34000.0	Level	FlightAware Transoceanic
Sun 12:30:08 AM	21.0143	-169.618	← 268°	424.0	488.0	34000.0	Level	FlightAware Transoceanic
Sun 12:31:19 AM	21.0085	-169.7757	← 268°	424.0	488.0	34000.0	Level	FlightAware Transoceanic
Sun 12:33:07 AM	21.0032	-170.0138	← 284°	424.0	488.0	34000.0	Level	FlightAware Transoceanic
Sun 12:33:29 AM	21.0	-170.0	← 284°	417.0	480.0	34000.0	420 Climbing	Oakland Oceanic
Sun 12:35:30 AM	21.0667	-170.2667	← 284°	420.0	483.0	35000.0	190 Climbing	Oakland Oceanic
Sun 12:38:44 AM	21.1695	-170.7151	← 284°	420.0	483.0	35000.0	Level	FlightAware Transoceanic
Sun 12:40:04 AM	21.2059	-170.8753	← 284°	420.0	483.0	35000.0	Level	FlightAware Transoceanic
Sun 12:41:47 AM	21.2526	-171.0817	← 284°	420.0	483.0	35000.0	Level	FlightAware Transoceanic
Sun 12:43:09 AM	21.2896	-171.2461	← 284°	420.0	483.0	35000.0	Level	FlightAware Transoceanic
Sun 12:45:07 AM	21.3425	-171.4828	← 283°	420.0	483.0	35000.0	Level	FlightAware Transoceanic
Sun 12:45:07 AM	21.3167	-171.4167	← 284°	418.0	481.0	35000.0	Level	Oakland Oceanic
Sun 12:48:06 AM	21.4006	-171.7927	← 283°	418.0	481.0	35000.0	Level	FlightAware Transoceanic
Sun 12:49:19 AM	21.4333	-171.9402	← 283°	418.0	481.0	35000.0	Level	FlightAware Transoceanic
Sun 12:51:08 AM	21.4819	-172.1606	← 283°	418.0	481.0	35000.0	Level	FlightAware Transoceanic
Sun 12:52:24 AM	21.5156	-172.3144	← 283°	418.0	481.0	35000.0	Level	FlightAware Transoceanic
Sun 12:54:42 AM	21.5833	-172.5833	← 283°	420.0	483.0	35000.0	Level	Oakland Oceanic
Sun 12:56:35 AM	21.625	-172.7767	← 283°	420.0	483.0	35000.0	Level	FlightAware Transoceanic
Sun 12:58:07 AM	21.6651	-172.9645	← 283°	420.0	483.0	35000.0	Level	FlightAware Transoceanic
Sun 12:59:41 AM	21.7059	-173.1564	← 283°	420.0	483.0	35000.0	Level	FlightAware Transoceanic
Sun 01:01:58 AM	21.7649	-173.4363	← 283°	420.0	483.0	35000.0	Level	FlightAware Transoceanic
Sun 01:03:38 AM	21.8077	-173.6408	← 283°	420.0	483.0	35000.0	Level	FlightAware Transoceanic
Sun 01:04:17 AM	21.8333	-173.7667	← 283°	419.0	482.0	35000.0	33 Climbing	Oakland Oceanic
Sun 01:09:44 AM	21.9667	-174.4333	← 282°	416.0	479.0	35200.0	133 Climbing	Oakland Oceanic
Sun 01:11:47 AM	22.0167	-174.6667	← 282°	416.0	479.0	36000.0	192 Climbing	Oakland Oceanic
Sun 01:13:54 AM	22.0667	-174.9333	← 282°	415.0	478.0	36000.0	Level	Oakland Oceanic
Sun 01:16:36 AM	22.1306	-175.2523	← 282°	415.0	478.0	36000.0	Level	FlightAware Transoceanic
Sun 01:18:07 AM	22.1675	-175.4386	← 282°	415.0	478.0	36000.0	Level	FlightAware Transoceanic
Sun 01:19:41 AM	22.2055	-175.6312	← 282°	415.0	478.0	36000.0	Level	FlightAware Transoceanic
Sun 01:21:40 AM	22.2532	-175.8752	← 282°	415.0	478.0	36000.0	Level	FlightAware Transoceanic
Sun 01:22:56 AM	22.2835	-176.0311	← 282°	415.0	478.0	36000.0	Level	FlightAware Transoceanic
Sun 01:23:30 AM	22.3	-176.1167	← 282°	417.0	480.0	36000.0	Level	Oakland Oceanic
Sun 01:26:37 AM	22.3838	-176.5539	← 282°	417.0	480.0	36000.0	Level	FlightAware Transoceanic
Sun 01:28:07 AM	22.4182	-176.7352	← 282°	417.0	480.0	36000.0	Level	FlightAware Transoceanic
Sun 01:30:14 AM	22.4664	-176.9912	← 281°	417.0	480.0	36000.0	Level	FlightAware Transoceanic
Sun 01:32:27 AM	22.5164	-177.2595	← 281°	417.0	480.0	36000.0	Level	FlightAware Transoceanic
Sun 01:33:05 AM	22.5333	-177.3	← 281°	418.0	481.0	36000.0	Level	Oakland Oceanic
Sun 01:42:42 AM	22.75	-178.5	← 281°	420.0	483.0	36000.0	Level	Oakland Oceanic
Sun 01:45:07 AM	22.7951	-178.7642	← 280°	420.0	483.0	36000.0	Level	FlightAware Transoceanic
Sun 01:46:37 AM	22.8268	-178.9515	← 280°	420.0	483.0	36000.0	Level	FlightAware Transoceanic
Sun 01:48:05 AM	22.8576	-179.1347	← 280°	420.0	483.0	36000.0	Level	FlightAware Transoceanic
Sun 01:50:08 AM	22.9003	-179.391	← 280°	420.0	483.0	36000.0	Level	FlightAware Transoceanic
Sun 01:52:18 AM	22.95	-179.7	← 280°	422.0	486.0	36000.0	Level	Oakland Oceanic
Sun 01:54:13 AM	22.987	-179.9216	← 280°	422.0	486.0	36000.0	Level	FlightAware Transoceanic
Sun 01:54:44 AM	23.0	180.0	← 290°	410.0	472.0	36000.0	Level	Oakland Oceanic
Sun 01:56:35 AM	23.0625	179.8159	← 290°	410.0	472.0	36000.0	Level	FlightAware Transoceanic
Sun 01:58:08 AM	23.1234	179.6356	← 290°	410.0	472.0	36000.0	Level	FlightAware Transoceanic
Sun 01:59:39 AM	23.1828	179.459	← 290°	410.0	472.0	36000.0	Level	FlightAware Transoceanic
Sun 02:01:37 AM	23.2596	179.2297	← 290°	410.0	472.0	36000.0	Level	FlightAware Transoceanic
Sun 02:01:54 AM	23.2833	179.1333	← 290°	405.0	466.0	36000.0	Level	Oakland Oceanic
Sun 02:05:08 AM	23.4044	178.7691	← 290°	405.0	466.0	36000.0	Level	FlightAware Transoceanic
Sun 02:06:38 AM	23.462	178.5947	← 290°	405.0	466.0	36000.0	Level	FlightAware Transoceanic
Sun 02:08:05 AM	23.5176	178.426	← 290°	405.0	466.0	36000.0	Level	FlightAware Transoceanic
Sun 02:10:08 AM	23.5958	178.1872	← 290°	405.0	466.0	36000.0	146 Climbing	FlightAware Transoceanic
Sun 02:11:30 AM	23.6667	178.0	← 289°	402.0	463.0	36500.0	167 Climbing	Oakland Oceanic
Sun 02:13:08 AM	23.7451	177.7572	← 289°	402.0	463.0	36500.0	Level	FlightAware Transoceanic
Sun 02:14:40 AM	23.8012	177.5825	← 289°	402.0	463.0	36500.0	Level	FlightAware Transoceanic
Sun 02:16:42 AM	23.8753	177.3506	← 289°	402.0	463.0	36500.0	Level	FlightAware Transoceanic
Sun 02:18:44 AM	23.949	177.1185	← 289°	402.0	463.0	36500.0	Level	FlightAware Transoceanic
Sun 02:20:04 AM	23.9972	176.9661	← 289°	402.0	463.0	36500.0	211 Climbing	FlightAware Transoceanic
Sun 02:21:06 AM	24.0333	176.8667	← 289°	400.0	460.0	37000.0	163 Climbing	Oakland Oceanic
Sun 02:23:08 AM	24.1098	176.6226	← 289°	400.0	460.0	37000.0	Level	FlightAware Transoceanic
Sun 02:25:04 AM	24.1788	176.4008	← 289°	400.0	460.0	37000.0	Level	FlightAware Transoceanic
Sun 02:27:14 AM	24.2558	176.1519	← 289°	400.0	460.0	37000.0	Level	FlightAware Transoceanic
Sun 02:28:25 AM	24.2976	176.0159	← 289°	400.0	460.0	37000.0	Level	FlightAware Transoceanic
Sun 02:30:09 AM	24.3587	175.8165	← 289°	400.0	460.0	37000.0	Level	FlightAware Transoceanic
Sun 02:30:42 AM	24.3833	175.7333	← 289°	401.0	461.0	37000.0	Level	Oakland Oceanic
Sun 02:33:08 AM	24.4598	175.4814	← 288°	401.0	461.0	37000.0	Level	FlightAware Transoceanic
Sun 02:34:39 AM	24.5139	175.3024	← 288°	401.0	461.0	37000.0	Level	FlightAware Transoceanic
Sun 02:36:36 AM	24.5832	175.072	← 288°	401.0	461.0	37000.0	Level	FlightAware Transoceanic
Sun 02:37:45 AM	24.6239	174.936	← 288°	401.0	461.0	37000.0	Level	FlightAware Transoceanic
Sun 02:39:40 AM	24.6914	174.7092	← 288°	401.0	461.0	37000.0	Level	FlightAware Transoceanic
Sun 02:40:18 AM	24.7167	174.6	← 288°	400.0	460.0	37000.0	Level	Oakland Oceanic
Sun 02:50:02 AM	25.05	173.4833	← 288°	399.0	459.0	37000.0	Level	Oakland Oceanic
Sun 02:52:06 AM	25.1215	173.2326	← 287°	399.0	459.0	37000.0	Level	FlightAware Transoceanic
Sun 02:53:07 AM	25.156	173.1113	← 287°	399.0	459.0	37000.0	Level	FlightAware Transoceanic
Sun 02:54:43 AM	25.2101	172.9203	← 287°	399.0	459.0	37000.0	Level	FlightAware Transoceanic
Sun 02:56:36 AM	25.2734	172.6952	← 287°	399.0	459.0	37000.0	Level	FlightAware Transoceanic
Sun 02:58:18 AM	25.3303	172.4918	← 287°	399.0	459.0	37000.0	Level	FlightAware Transoceanic
Sun 02:59:31 AM	25.3667	172.35	← 287°	398.0	458.0	37000.0	Level	Oakland Oceanic
Sun 03:01:56 AM	25.4619	172.0069	← 287°	398.0	458.0	37000.0	Level	FlightAware Transoceanic
Sun 03:03:07 AM	25.5001	171.8683	← 287°	398.0	458.0	37000.0	Level	FlightAware Transoceanic
Sun 03:05:06 AM	25.5638	171.6359	← 287°	398.0	458.0	37000.0	97 Climbing	FlightAware Transoceanic
Sun 03:06:12 AM	25.5833	171.5833	← 287°	391.0	450.0	37300.0	99 Climbing	Oakland Oceanic
Sun 03:08:07 AM	25.6474	171.3444	← 287°	391.0	450.0	37300.0	Level	FlightAware Transoceanic
Sun 03:09:18 AM	25.6831	171.2109	← 286°	391.0	450.0	37300.0	Level	FlightAware Transoceanic
Sun 03:11:27 AM	25.7476	170.9681	← 286°	391.0	450.0	37300.0	Level	FlightAware Transoceanic
Sun 03:13:06 AM	25.7968	170.7816	← 286°	391.0	450.0	37300.0	Level	FlightAware Transoceanic
Sun 03:14:40 AM	25.8433	170.6044	← 286°	391.0	450.0	37300.0	258 Climbing	FlightAware Transoceanic
Sun 03:15:49 AM	25.8667	170.5	← 287°	386.0	444.0	38000.0	201 Climbing	Oakland Oceanic
Sun 03:18:09 AM	25.9386	170.2314	← 287°	386.0	444.0	38000.0	Level	FlightAware Transoceanic
Sun 03:19:41 AM	25.9895	170.0396	← 286°	386.0	444.0	38000.0	Level	FlightAware Transoceanic
Sun 03:20:06 AM	26.0	170.0	← 302°	386.0	444.0	38000.0	Level	Oakland Oceanic
Sun 03:21:55 AM	26.1045	169.8133	← 302°	386.0	444.0	38000.0	Level	FlightAware Transoceanic
Sun 03:23:09 AM	26.1716	169.693	← 302°	386.0	444.0	38000.0	Level	FlightAware Transoceanic
Sun 03:25:07 AM	26.2784	169.5008	← 302°	386.0	444.0	38000.0	Level	FlightAware Transoceanic
Sun 03:25:23 AM	26.3	169.4667	← 302°	380.0	437.0	38000.0	Level	Oakland Oceanic
Sun 03:28:19 AM	26.4766	169.1471	← 302°	380.0	437.0	38000.0	Level	FlightAware Transoceanic
Sun 03:30:09 AM	26.5739	168.9699	← 301°	380.0	437.0	38000.0	Level	FlightAware Transoceanic
Sun 03:31:30 AM	26.6454	168.8391	← 301°	380.0	437.0	38000.0	Level	FlightAware Transoceanic
Sun 03:33:11 AM	26.7343	168.6759	← 301°	380.0	437.0	38000.0	Level	FlightAware Transoceanic
Sun 03:34:41 AM	26.8135	168.5303	← 301°	380.0	437.0	38000.0	Level	FlightAware Transoceanic
Sun 03:35:00 AM	26.8333	168.4833	← 301°	377.0	434.0	38000.0	Level	Oakland Oceanic
Sun 03:44:36 AM	27.35	167.5333	← 301°	371.0	427.0	38000.0	Level	Oakland Oceanic
Sun 03:47:00 AM	27.5038	167.2418	← 301°	371.0	427.0	38000.0	Level	FlightAware Transoceanic
Sun 03:48:04 AM	27.5584	167.1381	← 301°	371.0	427.0	38000.0	Level	FlightAware Transoceanic
Sun 03:49:23 AM	27.6256	167.0099	← 301°	371.0	427.0	38000.0	Level	FlightAware Transoceanic
Sun 03:50:32 AM	27.6842	166.8978	← 301°	371.0	427.0	38000.0	Level	FlightAware Transoceanic
Sun 03:51:35 AM	27.7377	166.7954	← 300°	371.0	427.0	38000.0	Level	FlightAware Transoceanic
Sun 03:53:07 AM	27.8156	166.6456	← 300°	371.0	427.0	38000.0	Level	FlightAware Transoceanic
Sun 03:54:12 AM	27.8667	166.55	← 300°	375.0	432.0	38000.0	Level	Oakland Oceanic
Sun 03:56:36 AM	27.998	166.2957	← 300°	375.0	432.0	38000.0	Level	FlightAware Transoceanic
Sun 03:58:43 AM	28.1046	166.0882	← 300°	375.0	432.0	38000.0	Level	FlightAware Transoceanic
Sun 03:59:55 AM	28.1648	165.9703	← 300°	375.0	432.0	38000.0	Level	FlightAware Transoceanic
Sun 04:01:44 AM	28.2559	165.7917	← 300°	375.0	432.0	38000.0	Level	FlightAware Transoceanic
Sun 04:03:11 AM	28.3284	165.6489	← 300°	375.0	432.0	38000.0	Level	FlightAware Transoceanic
Sun 04:03:51 AM	28.35	165.5833	← 300°	366.0	421.0	38000.0	Level	Oakland Oceanic
Sun 04:06:40 AM	28.4838	165.319	← 300°	366.0	421.0	38000.0	Level	FlightAware Transoceanic
Sun 04:08:25 AM	28.5713	165.1454	← 300°	366.0	421.0	38000.0	Level	FlightAware Transoceanic
Sun 04:09:38 AM	28.65	165.0	← 300°	355.0	409.0	38000.0	Level	Oakland Oceanic
Sun 04:11:29 AM	28.7238	164.8521	← 300°	355.0	409.0	38000.0	Level	FlightAware Transoceanic
Sun 04:12:06 AM	28.8333	164.65	← 300°			38000.0	-20 Descending	Oakland Oceanic
Sun 07:31:26 AM	35.8958	143.8861	← 260°	397.0	457.0	34000.0	Level	FlightAware ADS-B (NJA / RJTA)
Sun 07:32:06 AM	35.8788	143.7966	← 256°	402.0	463.0	33325.0	-1,099 Descending	FlightAware ADS-B (NJA / RJTA)
Sun 07:32:37 AM	35.8651	143.7303	← 256°	402.0	463.0	32700.000000000004	-1,099 Descending	FlightAware ADS-B (NJA / RJTA)
Sun 07:33:17 AM	35.847	143.6401	← 256°	403.0	464.0	32025.0	-900 Descending	FlightAware ADS-B (NJA / RJTA)
Sun 07:33:47 AM	35.8336	143.5734	← 256°	401.0	461.0	31650.0	-773 Descending	FlightAware ADS-B (NJA / RJTA)
Sun 07:34:23 AM	35.8171	143.491	← 256°	400.0	460.0	31175.0	-705 Descending	FlightAware ADS-B (OKO / RJTY)
Sun 07:34:53 AM	35.8041	143.4267	← 257°	395.0	455.0	30875.0	-714 Descending	FlightAware ADS-B (OKO / RJTY)
Sun 07:35:26 AM	35.7895	143.3543	← 256°	391.0	450.0	30425.0	-857 Descending	FlightAware ADS-B (OKO / RJTY)
Sun 07:35:56 AM	35.777	143.2922	← 257°	384.0	442.0	29975.0	-1,104 Descending	FlightAware ADS-B (OKO / RJTY)
Sun 07:36:19 AM	35.7669	143.2428	← 256°	378.0	435.0	29450.0	-1,882 Descending	FlightAware ADS-B (OKO / RJTY)
Sun 07:36:51 AM	35.753	143.1751	← 256°	385.0	443.0	28250.0	-1,741 Descending	FlightAware ADS-B (NRT / RJAA)
Sun 07:37:15 AM	35.7428	143.1246	← 257°	390.0	449.0	27825.0	-1,117 Descending	FlightAware ADS-B (OKO / RJTY)
Sun 07:37:38 AM	35.7329	143.0771	← 256°	381.0	438.0	27375.0	-1,067 Descending	FlightAware ADS-B (NJA / RJTA)
Sun 07:38:07 AM	35.7207	143.018	← 257°	371.0	427.0	26900.0	-1,176 Descending	FlightAware ADS-B (OKO / RJTY)
Sun 07:38:29 AM	35.7109	142.971	← 256°	364.0	419.0	26375.0	-1,282 Descending	FlightAware ADS-B (OKO / RJTY)
Sun 07:39:02 AM	35.6976	142.9062	← 256°	359.0	413.0	25725.0	-1,138 Descending	FlightAware ADS-B (OKO / RJTY)
Sun 07:39:27 AM	35.6879	142.8592	← 257°	357.0	411.0	25275.0	-1,174 Descending	FlightAware ADS-B (OKO / RJTY)
Sun 07:39:48 AM	35.6788	142.8153	← 256°	358.0	412.0	24825.0	-1,275 Descending	FlightAware ADS-B (FKS / RJSF)
Sun 07:40:07 AM	35.6707	142.7762	← 256°	357.0	411.0	24425.0	-1,133 Descending	FlightAware ADS-B (NRT / RJAA)
Sun 07:40:37 AM	35.6586	142.7188	← 256°	352.0	405.0	23900.0	-1,000 Descending	FlightAware ADS-B (OKO / RJTY)
Sun 07:40:58 AM	35.6511	142.6835	← 257°	351.0	404.0	23575.0	-1,050 Descending	FlightAware ADS-B (OKO / RJTY)
Sun 07:41:27 AM	35.6383	142.622	← 257°	352.0	405.0	23025.0	-1,119 Descending	FlightAware ADS-B (OKO / RJTY)
Sun 07:41:57 AM	35.6266	142.5659	← 257°	347.0	399.0	22475.0	-1,088 Descending	FlightAware ADS-B (NRT / RJAA)
Sun 07:42:18 AM	35.6216	142.5246	← 266°	335.0	386.0	22100.0	-1,137 Descending	FlightAware ADS-B (OKO / RJTY)
Sun 07:42:59 AM	35.6174	142.4477	← 267°	331.0	381.0	21300.0	-972 Descending	FlightAware ADS-B (NJA / RJTA)
Sun 07:43:29 AM	35.6151	142.3953	← 268°	334.0	384.0	20950.0	-871 Descending	FlightAware ADS-B (OKO / RJTY)
Sun 07:44:01 AM	35.6121	142.3305	← 267°	337.0	388.0	20400.0	-971 Descending	FlightAware ADS-B (NRT / RJAA)
Sun 07:44:20 AM	35.6104	142.2946	← 267°	336.0	387.0	20125.0	-875 Descending	FlightAware ADS-B (NJA / RJTA)
Sun 07:44:49 AM	35.6077	142.2396	← 268°	326.0	375.0	19700.0	-900 Descending	FlightAware ADS-B (OKO / RJTY)
Sun 07:45:20 AM	35.605	142.1836	← 267°	324.0	373.0	19225.0	-934 Descending	FlightAware ADS-B (OKO / RJTY)
Sun 07:45:50 AM	35.6023	142.1315	← 267°	322.0	371.0	18750.0	-975 Descending	FlightAware ADS-B (OKO / RJTY)
Sun 07:46:20 AM	35.5994	142.0745	← 268°	318.0	366.0	18250.0	-1,096 Descending	FlightAware ADS-B (OKO / RJTY)
Sun 07:46:42 AM	35.5975	142.035	← 267°	320.0	368.0	17800.0	-1,125 Descending	FlightAware ADS-B (NRT / RJAA)
Sun 07:47:00 AM	35.596	142.005	← 268°	321.0	369.0	17500.0	-969 Descending	FlightAware ADS-B (OKO / RJTY)
Sun 07:47:30 AM	35.593	141.9484	← 267°	318.0	366.0	17025.0	-1,000 Descending	FlightAware ADS-B (OKO / RJTY)
Sun 07:48:00 AM	35.5902	141.8954	← 266°	318.0	366.0	16500.0	-1,025 Descending	FlightAware ADS-B (OKO / RJTY)
Sun 07:48:30 AM	35.587	141.838	← 267°	317.0	365.0	16000.0	-689 Descending	FlightAware ADS-B (OKO / RJTY)
Sun 07:49:01 AM	35.584	141.7838	← 267°	318.0	366.0	15800.0	-472 Descending	FlightAware ADS-B (OKO / RJTY)
Sun 07:49:24 AM	35.5817	141.7393	← 268°	317.0	365.0	15575.0	-523 Descending	FlightAware ADS-B (NRT / RJAA)
Sun 07:49:44 AM	35.5837	141.7074	← 281°	310.0	357.0	15425.0	-477 Descending	FlightAware ADS-B (NRT / RJAA)
Sun 07:50:08 AM	35.5941	141.6646	← 292°	302.0	348.0	15225.0	-479 Descending	FlightAware ADS-B (NRT / RJAA)
Sun 07:50:31 AM	35.6044	141.6311	← 292°	302.0	348.0	15050.0	-479 Descending	FlightAware ADS-B (OKO / RJTY)
Sun 07:50:55 AM	35.6171	141.5912	← 293°	303.0	349.0	14850.0	-500 Descending	FlightAware ADS-B (NRT / RJAA)
Sun 07:51:31 AM	35.6359	141.5335	← 292°	303.0	349.0	14550.0	-636 Descending	FlightAware ADS-B (HND / RJTT)
Sun 07:52:01 AM	35.6518	141.4838	← 292°	303.0	349.0	14150.0	-750 Descending	FlightAware ADS-B (HND / RJTT)
Sun 07:52:29 AM	35.666	141.4397	← 292°	299.0	344.0	13825.0	-538 Descending	FlightAware ADS-B (HND / RJTT)
Sun 07:52:54 AM	35.678	141.4029	← 293°	295.0	339.0	13675.0	-529 Descending	FlightAware ADS-B (OKO / RJTY)
Sun 07:53:37 AM	35.7002	141.3334	← 292°	295.0	339.0	13225.0	-591 Descending	FlightAware ADS-B (NRT / RJAA)
Sun 07:54:00 AM	35.7106	141.3008	← 293°	292.0	336.0	13025.0	-923 Descending	FlightAware ADS-B (HND / RJTT)
Sun 07:54:42 AM	35.7318	141.2342	← 292°	288.0	331.0	12225.0	-1,396 Descending	FlightAware ADS-B (HND / RJTT)
Sun 07:55:12 AM	35.7469	141.1875	← 293°	285.0	328.0	11350.0	-1,675 Descending	FlightAware ADS-B (HND / RJTT)
Sun 07:55:42 AM	35.761	141.1433	← 292°	282.0	325.0	10550.0	-1,104 Descending	FlightAware ADS-B (HND / RJTT)
Sun 07:56:24 AM	35.7797	141.0835	← 291°	255.0	293.0	10025.0	-983 Descending	FlightAware ADS-B (NRT / RJAA)
Sun 07:56:40 AM	35.7867	141.0613	← 291°	257.0	296.0	9600.0	-1,081 Descending	FlightAware ADS-B (FKS / RJSF)
Sun 07:57:07 AM	35.7971	141.0288	← 292°	243.0	280.0	9250.0	-875 Descending	FlightAware ADS-B (HND / RJTT)
Sun 07:57:28 AM	35.8066	140.9992	← 291°	234.0	269.0	8900.0	-1,024 Descending	FlightAware ADS-B (OKO / RJTY)
Sun 07:57:48 AM	35.813	140.9788	← 292°	231.0	266.0	8550.0	-1,088 Descending	FlightAware ADS-B (HND / RJTT)
Sun 07:58:08 AM	35.8222	140.9502	← 291°	231.0	266.0	8175.000000000001	-1,208 Descending	FlightAware ADS-B (HND / RJTT)
Sun 07:58:24 AM	35.8282	140.9312	← 292°	228.0	262.0	7825.0	-1,200 Descending	FlightAware ADS-B (IBR / RJAH)
Sun 07:58:48 AM	35.8369	140.9034	← 291°	228.0	262.0	7375.0	-1,000 Descending	FlightAware ADS-B (HND / RJTT)
Sun 07:59:06 AM	35.8378	140.8774	← 253°	248.0	285.0	7125.0	-771 Descending	FlightAware ADS-B (OKO / RJTY)
Sun 07:59:23 AM	35.8298	140.8612	↙ 222°	257.0	296.0	6925.0	-682 Descending	FlightAware ADS-B (OKO / RJTY)
Sun 07:59:39 AM	35.8105	140.8483	↓ 196°	263.0	303.0	6750.0	-689 Descending	FlightAware ADS-B (FKS / RJSF)
Sun 08:00:00 AM	35.7844	140.8415	↓ 191°	265.0	305.0	6500.0	-784 Descending	FlightAware ADS-B (NRT / RJAA)
Sun 08:00:23 AM	35.756	140.8342	↓ 193°	267.0	307.0	6175.0	-825 Descending	FlightAware ADS-B (IBR / RJAH)
Sun 08:00:40 AM	35.7364	140.8284	↓ 194°	265.0	305.0	5950.0	-846 Descending	FlightAware ADS-B (NRT / RJAA)
Sun 08:01:02 AM	35.7098	140.8198	↓ 197°	261.0	300.0	5625.0	-788 Descending	FlightAware ADS-B (NRT / RJAA)
Sun 08:01:20 AM	35.6931	140.814	↓ 196°	256.0	295.0	5425.0	-698 Descending	FlightAware ADS-B (HND / RJTT)
Sun 08:01:45 AM	35.66	140.8025	↓ 196°	249.0	287.0	5125.0	-616 Descending	FlightAware ADS-B (IBR / RJAH)
Sun 08:02:16 AM	35.6268	140.7911	↓ 195°	233.0	268.0	4850.0	-635 Descending	FlightAware ADS-B (IBR / RJAH)
Sun 08:02:37 AM	35.6071	140.7846	↓ 195°	227.0	261.0	4575.0	-1,026 Descending	FlightAware ADS-B (NRT / RJAA)
Sun 08:02:54 AM	35.5902	140.7789	↓ 196°	225.0	259.0	4200.0	-933 Descending	FlightAware ADS-B (OKO / RJTY)
Sun 08:03:22 AM	35.5607	140.7694	↓ 197°	222.0	255.0	3875.0	-390 Descending	FlightAware ADS-B (HND / RJTT)
Sun 08:03:44 AM	35.5385	140.7619	↓ 196°	225.0	259.0	3875.0	Level	FlightAware ADS-B (HND / RJTT)
Sun 08:04:00 AM	35.5246	140.7542	↙ 217°	203.0	234.0	3875.0	94 Climbing	FlightAware ADS-B (IBR / RJAH)
Sun 08:04:16 AM	35.5145	140.7415	↙ 230°	193.0	222.0	3925.0	-33 Descending	FlightAware ADS-B (NRT / RJAA)
Sun 08:04:45 AM	35.4973	140.7174	↙ 229°	194.0	223.0	3850.0	-29 Descending	FlightAware ADS-B (HND / RJTT)
Sun 08:05:07 AM	35.4851	140.6995	↙ 230°	176.0	203.0	3900.0	64 Climbing	FlightAware ADS-B (NRT / RJAA)
Sun 08:05:32 AM	35.4734	140.6818	↙ 236°	173.0	199.0	3900.0	Level	FlightAware ADS-B (IBR / RJAH)
Sun 08:05:50 AM	35.4704	140.6643	← 285°	159.0	183.0	3900.0	-31 Descending	FlightAware ADS-B (IBR / RJAH)
Sun 08:06:21 AM	35.4803	140.64	← 299°	155.0	178.0	3875.0	-28 Descending	FlightAware ADS-B (HND / RJTT)
Sun 08:06:43 AM	35.488	140.6235	← 300°	157.0	181.0	3875.0	33 Climbing	FlightAware ADS-B (HND / RJTT)
Sun 08:07:07 AM	35.4969	140.6045	← 301°	157.0	181.0	3900.0	Level	FlightAware ADS-B (NRT / RJAA)
Sun 08:07:23 AM	35.5025	140.5926	← 299°	159.0	183.0	3875.0	Level	FlightAware ADS-B (NJA / RJTA)
Sun 08:07:39 AM	35.5081	140.5806	← 300°	161.0	185.0	3900.0	Level	FlightAware ADS-B (HND / RJTT)
Sun 08:08:06 AM	35.5182	140.559	← 301°	155.0	178.0	3875.0	Level	FlightAware ADS-B (NRT / RJAA)
Sun 08:08:24 AM	35.5265	140.5472	↖ 327°	155.0	178.0	3900.0	42 Climbing	FlightAware ADS-B (HND / RJTT)
Sun 08:08:42 AM	35.5369	140.5396	↖ 324°	158.0	182.0	3900.0	-43 Descending	FlightAware ADS-B (HND / RJTT)
Sun 08:08:59 AM	35.5478	140.5313	↖ 332°	154.0	177.0	3875.0	Level	FlightAware ADS-B (IBR / RJAH)
Sun 08:09:29 AM	35.5668	140.5178	↖ 330°	156.0	180.0	3900.0	31 Climbing	FlightAware ADS-B
Sun 08:09:47 AM	35.5784	140.5094	↖ 331°	156.0	180.0	3900.0	-300 Descending	FlightAware ADS-B (HND / RJTT)
Sun 08:10:04 AM	35.5887	140.5022	↖ 330°	157.0	181.0	3725.0	-786 Descending	FlightAware ADS-B (HND / RJTT)
Sun 08:10:29 AM	35.6043	140.491	↖ 331°	152.0	175.0	3350.0	-862 Descending	FlightAware ADS-B (HND / RJTT)
Sun 08:10:51 AM	35.6181	140.481	↖ 331°	155.0	178.0	3050.0	-886 Descending	FlightAware ADS-B (HND / RJTT)
Sun 08:11:13 AM	35.6317	140.4712	↖ 330°	156.0	180.0	2700.0	-946 Descending	FlightAware ADS-B (NRT / RJAA)
Sun 08:11:37 AM	35.6447	140.4618	↖ 330°	151.0	174.0	2325.0	-808 Descending	FlightAware ADS-B (OKO / RJTY)
Sun 08:12:05 AM	35.6629	140.4487	↖ 330°	137.0	158.0	2000.0	-750 Descending	FlightAware ADS-B (NRT / RJAA)
Sun 08:12:25 AM	35.6735	140.441	↖ 331°	134.0	154.0	1725.0	-833 Descending	FlightAware ADS-B (NRT / RJAA)
Sun 08:12:41 AM	35.6816	140.4353	↖ 330°	130.0	150.0	1500.0	-717 Descending	FlightAware ADS-B (HND / RJTT)
Sun 08:13:11 AM	35.6966	140.4244	↖ 329°	122.0	140.0	1175.0	-685 Descending	FlightAware ADS-B (NRT / RJAA)
Sun 08:13:27 AM	35.704	140.4191	↖ 329°	123.0	142.0	975.0	-706 Descending	FlightAware ADS-B (HND / RJTT)
Sun 08:13:45 AM	35.7133	140.4125	↖ 329°	123.0	142.0	775.0	-662 Descending	FlightAware ADS-B (HND / RJTT)
Sun 08:14:01 AM	35.7208	140.407	↖ 329°	127.0	146.0	600.0	-656 Descending	FlightAware ADS-B (HND / RJTT)
