# Supplementary material for: TrackMatcher – a tool for finding intercepts in tracks of geographical positions
Source: Copernicus journal article supplement (doi:10.5194/gmd-15-7557-2022), 2022-10-18
Supplement: Supplementary file 1 [file gmd-15-7557-2022-supplement.zip › ESM/example/data/flights/JAL793_27-JAN-2019_PHNL-RJGG.dat]

Time (CET)	Latitude	Longitude	Course	kts	mph	feet	Rate	Reporting Facility
Sun 11:28:59 PM	21.3066	-157.9081	→ 94°	176.0	203.0	675.0	Level	FlightAware ADS-B (PHHI)
Sun 11:29:15 PM	21.3021	-157.8956	↘ 129°	186.0	214.0	1350.0	2,531 Climbing	FlightAware ADS-B (PHNL)
Sun 11:29:31 PM	21.2897	-157.8878	↓ 163°	196.0	226.0	2025.0	2,203 Climbing	FlightAware ADS-B (PHNL)
Sun 11:29:47 PM	21.2757	-157.8842	↓ 168°	197.0	227.0	2525.0	1,969 Climbing	FlightAware ADS-B (PHHI)
Sun 11:30:03 PM	21.2607	-157.8827	↓ 183°	199.0	229.0	3075.0	1,618 Climbing	FlightAware ADS-B (PHNL)
Sun 11:30:25 PM	21.2395	-157.8861	↓ 192°	221.0	254.0	3550.0	1,250 Climbing	FlightAware ADS-B (OGG / PHOG)
Sun 11:30:45 PM	21.2189	-157.8907	↓ 196°	242.0	278.0	3950.0	1,224 Climbing	FlightAware ADS-B (OGG / PHOG)
Sun 11:31:03 PM	21.1999	-157.9032	↙ 227°	263.0	303.0	4325.0	1,114 Climbing	FlightAware ADS-B (PHNL)
Sun 11:31:20 PM	21.1915	-157.9195	← 255°	276.0	318.0	4600.0	1,800 Climbing	FlightAware ADS-B (PHNL)
Sun 11:31:43 PM	21.1875	-157.9557	← 266°	286.0	329.0	5525.0	2,802 Climbing	FlightAware ADS-B (PHNL)
Sun 11:32:13 PM	21.1841	-157.9983	← 265°	283.0	326.0	7075.0	2,968 Climbing	FlightAware ADS-B (PHNL)
Sun 11:32:30 PM	21.1824	-158.0189	← 267°	281.0	323.0	7850.0	2,791 Climbing	FlightAware ADS-B (PHNL)
Sun 11:32:56 PM	21.1799	-158.0572	← 266°	284.0	327.0	9075.0	2,700 Climbing	FlightAware ADS-B (PHIK)
Sun 11:33:15 PM	21.1786	-158.0815	← 267°	284.0	327.0	9875.0	2,082 Climbing	FlightAware ADS-B (PHNL)
Sun 11:33:45 PM	21.1772	-158.1276	← 269°	302.0	348.0	10775.0	1,500 Climbing	FlightAware ADS-B (PHHI)
Sun 11:34:04 PM	21.1765	-158.1586	← 270°	320.0	368.0	11100.0	1,102 Climbing	FlightAware ADS-B (PHNL)
Sun 11:34:34 PM	21.1753	-158.2082	← 269°	347.0	399.0	11675.0	1,925 Climbing	FlightAware ADS-B (PHNL)
Sun 11:35:04 PM	21.1736	-158.2619	← 269°	355.0	409.0	13025.0	3,000 Climbing	FlightAware ADS-B (PHNL)
Sun 11:35:34 PM	21.1718	-158.3109	← 269°	358.0	412.0	14675.0	2,879 Climbing	FlightAware ADS-B (PHNL)
Sun 11:36:06 PM	21.1721	-158.368	← 272°	363.0	418.0	16000.0	2,540 Climbing	FlightAware ADS-B (OGG / PHOG)
Sun 11:36:36 PM	21.1729	-158.422	← 271°	370.0	426.0	17300.0	2,650 Climbing	FlightAware ADS-B (PHIK)
Sun 11:37:06 PM	21.1734	-158.4779	← 271°	374.0	430.0	18650.0	2,493 Climbing	FlightAware ADS-B (PHIK)
Sun 11:37:50 PM	21.1739	-158.562	← 270°	384.0	442.0	20375.0	2,240 Climbing	FlightAware ADS-B (KOA / PHKO)
Sun 11:38:21 PM	21.1748	-158.6222	← 271°	393.0	452.0	21450.0	2,051 Climbing	FlightAware ADS-B (PHNL)
Sun 11:38:39 PM	21.1754	-158.6564	← 271°	397.0	457.0	22050.0	2,063 Climbing	FlightAware ADS-B (KOA / PHKO)
Sun 11:39:17 PM	21.1763	-158.7312	← 272°	401.0	461.0	23375.0	2,096 Climbing	FlightAware ADS-B (OGG / PHOG)
Sun 11:39:52 PM	21.1773	-158.7995	← 272°	404.0	465.0	24600.0	2,250 Climbing	FlightAware ADS-B (MUE / PHMU)
Sun 11:40:27 PM	21.1781	-158.8696	← 270°	404.0	465.0	26000.0	2,238 Climbing	FlightAware ADS-B (KOA / PHKO)
Sun 11:40:57 PM	21.1786	-158.9329	← 270°	407.0	468.0	27025.0	1,950 Climbing	FlightAware ADS-B (PHIK)
Sun 11:41:27 PM	21.1789	-158.9931	← 270°	410.0	472.0	27950.0	1,725 Climbing	FlightAware ADS-B (PHIK)
Sun 11:41:57 PM	21.1792	-159.0535	← 271°	414.0	476.0	28750.0	1,475 Climbing	FlightAware ADS-B (KOA / PHKO)
Sun 11:42:28 PM	21.1796	-159.1178	← 270°	422.0	486.0	29450.0	1,250 Climbing	FlightAware ADS-B (PHNL)
Sun 11:42:45 PM	21.1799	-159.1482	← 272°	426.0	490.0	29750.0	1,230 Climbing	FlightAware ADS-B (MUE / PHMU)
Sun 11:43:18 PM	21.1807	-159.224	← 271°	433.0	498.0	30475.0	1,238 Climbing	FlightAware ADS-B (PHNL)
Sun 11:43:48 PM	21.1811	-159.2875	← 271°	439.0	505.0	31050.0	1,350 Climbing	FlightAware ADS-B (PHIK)
Sun 11:44:18 PM	21.1815	-159.3505	← 270°	439.0	505.0	31825.0	910 Climbing	FlightAware ADS-B (LIH / PHLI)
Sun 11:44:49 PM	21.1821	-159.4203	← 271°	436.0	502.0	31975.0	148 Climbing	FlightAware ADS-B (PHIK)
Sun 11:45:19 PM	21.1826	-159.4846	← 271°	432.0	497.0	31975.0	25 Climbing	FlightAware ADS-B (PHIK)
Sun 11:45:49 PM	21.183	-159.55	← 270°	434.0	499.0	32000.0	25 Climbing	FlightAware ADS-B (PHIK)
Sun 11:46:19 PM	21.1833	-159.6122	← 270°	433.0	498.0	32000.0	-25 Descending	FlightAware ADS-B (LIH / PHLI)
Sun 11:46:49 PM	21.1836	-159.676	← 271°	430.0	495.0	31975.0	Level	FlightAware ADS-B (OGG / PHOG)
Sun 11:47:20 PM	21.1838	-159.7361	← 271°	429.0	494.0	32000.0	Level	FlightAware ADS-B (MUE / PHMU)
Sun 11:47:51 PM	21.1841	-159.8065	← 270°	430.0	495.0	31975.0	-25 Descending	FlightAware ADS-B (LIH / PHLI)
Sun 11:48:21 PM	21.1843	-159.8702	← 270°	431.0	496.0	31975.0	Level	FlightAware ADS-B (LIH / PHLI)
Sun 11:49:01 PM	21.1847	-159.9583	← 270°	432.0	497.0	31975.0	21 Climbing	FlightAware ADS-B (PHIK)
Sun 11:49:31 PM	21.1849	-160.0228	← 270°	431.0	496.0	32000.0	Level	FlightAware ADS-B (PHIK)
Sun 11:50:01 PM	21.185	-160.0863	← 270°	431.0	496.0	31975.0	Level	FlightAware ADS-B (PHIK)
Sun 11:50:31 PM	21.1852	-160.1505	← 270°	431.0	496.0	32000.0	Level	FlightAware ADS-B (PHIK)
Sun 11:51:01 PM	21.1853	-160.2128	← 270°	432.0	497.0	31975.0	Level	FlightAware ADS-B (PHIK)
Sun 11:51:33 PM	21.1854	-160.2809	← 270°	433.0	498.0	32000.0	Level	FlightAware ADS-B (LIH / PHLI)
Sun 11:52:06 PM	21.1855	-160.3514	← 270°	433.0	498.0	31975.0	-24 Descending	FlightAware ADS-B (PHNL)
Sun 11:52:36 PM	21.1855	-160.4166	← 270°	434.0	499.0	31975.0	Level	FlightAware ADS-B (PHNL)
Sun 11:53:08 PM	21.1855	-160.4837	← 270°	434.0	499.0	31975.0	Level	FlightAware ADS-B (PHNL)
Sun 11:53:38 PM	21.1855	-160.5491	← 270°	433.0	498.0	31975.0	23 Climbing	FlightAware ADS-B (PHNL)
Sun 11:54:13 PM	21.1855	-160.6252	← 270°	429.0	494.0	32000.0	Level	FlightAware ADS-B (PHNL)
Sun 11:54:36 PM	21.1855	-160.6739	← 270°	427.0	491.0	31975.0	Level	FlightAware ADS-B (PHNL)
Sun 11:54:53 PM	21.1854	-160.7086	← 270°	428.0	493.0	32000.0	Level	FlightAware ADS-B (PHNL)
Sun 11:55:30 PM	21.1853	-160.7877	← 270°	427.0	491.0	31975.0	Level	FlightAware ADS-B (PHNL)
Sun 11:56:03 PM	21.185	-160.8589	← 270°	428.0	493.0	32000.0	24 Climbing	FlightAware ADS-B (PHNL)
Sun 11:56:33 PM	21.1851	-160.9225	← 270°	431.0	496.0	32000.0	-25 Descending	FlightAware ADS-B (PHNL)
Sun 11:57:04 PM	21.1848	-160.9876	← 270°	429.0	494.0	31975.0	Level	FlightAware ADS-B (PHNL)
Sun 11:57:54 PM	21.1846	-161.0942	← 270°	433.0	498.0	32000.0	19 Climbing	FlightAware ADS-B (PHNL)
Sun 11:58:24 PM	21.1843	-161.1583	← 270°	433.0	498.0	32000.0	Level	FlightAware ADS-B (PHNL)
Sun 11:58:54 PM	21.184	-161.2236	← 270°	432.0	497.0	32000.0	Level	FlightAware ADS-B (PHNL)
Sun 11:59:25 PM	21.1837	-161.2871	← 270°	432.0	497.0	32000.0	Level	FlightAware ADS-B (PHNL)
Sun 11:59:55 PM	21.1835	-161.35	← 270°	433.0	498.0	32000.0	-25 Descending	FlightAware ADS-B (PHNL)
Mon 12:00:25 AM	21.1831	-161.4154	← 270°	433.0	498.0	31975.0	Level	FlightAware ADS-B (PHNL)
Mon 12:01:17 AM	21.1825	-161.5284	← 270°	434.0	499.0	32000.0	18 Climbing	FlightAware ADS-B (PHNL)
Mon 12:01:48 AM	21.1821	-161.5929	← 270°	433.0	498.0	32000.0	Level	FlightAware ADS-B (PHNL)
Mon 12:02:30 AM	21.1815	-161.6823	← 270°	434.0	499.0	32000.0	-21 Descending	FlightAware ADS-B (PHNL)
Mon 12:03:00 AM	21.1809	-161.7485	← 270°	434.0	499.0	31975.0	Level	FlightAware ADS-B (PHNL)
Mon 12:03:34 AM	21.1805	-161.8215	← 270°	431.0	496.0	32000.0	Level	FlightAware ADS-B (PHNL)
Mon 12:04:05 AM	21.1799	-161.8874	← 270°	430.0	495.0	31975.0	Level	FlightAware ADS-B (PHNL)
Mon 12:04:51 AM	21.179	-161.9861	← 270°	431.0	496.0	32000.0	12 Climbing	FlightAware ADS-B (PHNL)
Mon 12:06:06 AM	21.1667	-162.1333	← 270°	430.0	495.0	32000.0	-15 Descending	Honolulu Center
Mon 12:06:28 AM	21.1771	-162.1911	← 270°	432.0	497.0	31975.0	Level	FlightAware ADS-B (OGG / PHOG)
Mon 12:08:06 AM	21.1667	-162.3833	← 270°	430.0	495.0	32000.0	9 Climbing	Honolulu Center
Mon 12:09:07 AM	21.1667	-162.5167	← 270°	430.0	495.0	32000.0	Level	Honolulu Center
Mon 12:10:07 AM	21.1667	-162.65	← 270°	430.0	495.0	32000.0	Level	Honolulu Center
Mon 12:11:07 AM	21.1667	-162.75	← 270°	440.0	506.0	32000.0	Level	Honolulu Center
Mon 12:12:17 AM	21.1667	-162.9333	← 270°	440.0	506.0	32000.0	Level	Honolulu Center
Mon 12:13:17 AM	21.15	-163.0667	← 262°	440.0	506.0	32000.0	Level	Honolulu Center
Mon 12:14:17 AM	21.15	-163.2	← 270°	440.0	506.0	32000.0	Level	Honolulu Center
Mon 12:15:17 AM	21.15	-163.3167	← 270°	440.0	506.0	32000.0	Level	Honolulu Center
Mon 12:16:17 AM	21.15	-163.45	← 270°	430.0	495.0	32000.0	Level	Honolulu Center
Mon 12:17:18 AM	21.15	-163.5667	← 270°	430.0	495.0	32000.0	450 Climbing	Honolulu Center
Mon 12:26:30 AM	21.2833	-164.7333	← 279°	433.0	498.0	36600.0	Level	Oakland Oceanic
Mon 12:29:38 AM	21.3535	-165.1976	← 279°	433.0	498.0	36600.0	Level	FlightAware Transoceanic
Mon 12:30:44 AM	21.3745	-165.3383	← 279°	433.0	498.0	36600.0	Level	FlightAware Transoceanic
Mon 12:32:34 AM	21.4092	-165.573	← 279°	433.0	498.0	36600.0	Level	FlightAware Transoceanic
Mon 12:35:08 AM	21.4573	-165.9017	← 279°	433.0	498.0	36600.0	394 Climbing	FlightAware Transoceanic
Mon 12:36:07 AM	21.4667	-165.9667	← 279°	437.0	503.0	38000.0	464 Climbing	Oakland Oceanic
Mon 12:38:09 AM	21.5068	-166.2457	← 279°	437.0	503.0	38000.0	Level	FlightAware Transoceanic
Mon 12:39:15 AM	21.5272	-166.3884	← 279°	437.0	503.0	38000.0	Level	FlightAware Transoceanic
Mon 12:41:30 AM	21.5684	-166.6803	← 279°	437.0	503.0	38000.0	Level	FlightAware Transoceanic
Mon 12:43:07 AM	21.5977	-166.8902	← 279°	437.0	503.0	38000.0	Level	FlightAware Transoceanic
Mon 12:44:36 AM	21.6244	-167.0828	← 278°	437.0	503.0	38000.0	Level	FlightAware Transoceanic
Mon 12:45:42 AM	21.6333	-167.2	← 279°	438.0	504.0	38000.0	Level	Oakland Oceanic
Mon 12:48:43 AM	21.6834	-167.5614	← 278°	438.0	504.0	38000.0	Level	FlightAware Transoceanic
Mon 12:50:40 AM	21.7189	-167.821	← 278°	438.0	504.0	38000.0	Level	FlightAware Transoceanic
Mon 12:53:41 AM	21.7729	-168.2228	← 278°	438.0	504.0	38000.0	Level	FlightAware Transoceanic
Mon 12:55:08 AM	21.7986	-168.416	← 278°	438.0	504.0	38000.0	Level	FlightAware Transoceanic
Mon 12:55:18 AM	21.8	-168.45	← 278°	437.0	503.0	38000.0	Level	Oakland Oceanic
Mon 01:04:54 AM	21.9667	-169.7	← 277°	441.0	507.0	38000.0	Level	Oakland Oceanic
Mon 01:07:11 AM	22.0074	-170.0219	← 290°	441.0	507.0	38000.0	Level	FlightAware Transoceanic
Mon 01:08:17 AM	22.05	-170.1333	← 290°	437.0	503.0	38000.0	Level	Oakland Oceanic
Mon 01:10:06 AM	22.1362	-170.3895	← 290°	437.0	503.0	38000.0	Level	FlightAware Transoceanic
Mon 01:11:35 AM	22.1969	-170.5709	← 290°	437.0	503.0	38000.0	Level	FlightAware Transoceanic
Mon 01:12:41 AM	22.2418	-170.7055	← 290°	437.0	503.0	38000.0	Level	FlightAware Transoceanic
Mon 01:14:30 AM	22.3	-170.9	← 290°	436.0	502.0	38000.0	Level	Oakland Oceanic
Mon 01:17:09 AM	22.4272	-171.2849	← 290°	436.0	502.0	38000.0	Level	FlightAware Transoceanic
Mon 01:19:02 AM	22.5028	-171.5153	← 290°	436.0	502.0	38000.0	Level	FlightAware Transoceanic
Mon 01:20:04 AM	22.5442	-171.6419	← 289°	436.0	502.0	38000.0	Level	FlightAware Transoceanic
Mon 01:21:21 AM	22.5954	-171.7991	← 289°	436.0	502.0	38000.0	Level	FlightAware Transoceanic
Mon 01:23:07 AM	22.6656	-172.0159	← 289°	436.0	502.0	38000.0	Level	FlightAware Transoceanic
Mon 01:24:06 AM	22.6833	-172.0833	← 289°	437.0	503.0	38000.0	Level	Oakland Oceanic
Mon 01:26:38 AM	22.7881	-172.4082	← 289°	437.0	503.0	38000.0	Level	FlightAware Transoceanic
Mon 01:28:20 AM	22.8554	-172.6184	← 289°	437.0	503.0	38000.0	Level	FlightAware Transoceanic
Mon 01:29:39 AM	22.9073	-172.7814	← 289°	437.0	503.0	38000.0	Level	FlightAware Transoceanic
Mon 01:30:59 AM	22.9597	-172.9466	← 289°	437.0	503.0	38000.0	Level	FlightAware Transoceanic
Mon 01:33:05 AM	23.0419	-173.2069	← 289°	437.0	503.0	38000.0	Level	FlightAware Transoceanic
Mon 01:33:42 AM	23.0667	-173.2833	← 289°	439.0	505.0	38000.0	Level	Oakland Oceanic
Mon 01:35:40 AM	23.1331	-173.4951	← 289°	439.0	505.0	38000.0	Level	FlightAware Transoceanic
Mon 01:38:07 AM	23.2303	-173.8074	← 289°	439.0	505.0	38000.0	Level	FlightAware Transoceanic
Mon 01:40:09 AM	23.3104	-174.0668	← 289°	439.0	505.0	38000.0	Level	FlightAware Transoceanic
Mon 01:42:12 AM	23.3908	-174.3287	← 288°	439.0	505.0	38000.0	Level	FlightAware Transoceanic
Mon 01:43:19 AM	23.45	-174.4833	← 288°	440.0	506.0	38000.0	Level	Oakland Oceanic
Mon 01:45:15 AM	23.536	-174.7683	← 288°	440.0	506.0	38000.0	Level	FlightAware Transoceanic
Mon 01:46:38 AM	23.5886	-174.944	← 288°	440.0	506.0	38000.0	Level	FlightAware Transoceanic
Mon 01:48:05 AM	23.6435	-175.1282	← 288°	440.0	506.0	38000.0	Level	FlightAware Transoceanic
Mon 01:49:50 AM	23.7095	-175.3507	← 288°	440.0	506.0	38000.0	Level	FlightAware Transoceanic
Mon 01:51:38 AM	23.777	-175.5799	← 288°	440.0	506.0	38000.0	Level	FlightAware Transoceanic
Mon 01:52:50 AM	23.8219	-175.7328	← 288°	440.0	506.0	38000.0	1,579 Climbing	FlightAware Transoceanic
Mon 01:52:54 AM	23.8	-175.7	← 288°	431.0	496.0	40000.0	876 Climbing	Oakland Oceanic
Mon 01:55:07 AM	23.8782	-175.9653	← 288°	431.0	496.0	40000.0	Level	FlightAware Transoceanic
Mon 01:57:05 AM	23.9505	-176.2121	← 288°	431.0	496.0	40000.0	Level	FlightAware Transoceanic
Mon 01:58:08 AM	23.9889	-176.344	← 288°	431.0	496.0	40000.0	Level	FlightAware Transoceanic
Mon 01:59:11 AM	24.0272	-176.4759	← 288°	431.0	496.0	40000.0	Level	FlightAware Transoceanic
Mon 02:00:25 AM	24.0721	-176.631	← 288°	431.0	496.0	40000.0	Level	FlightAware Transoceanic
Mon 02:02:30 AM	24.15	-176.9	← 287°	434.0	499.0	40000.0	Level	Oakland Oceanic
Mon 02:02:32 AM	24.1487	-176.8974	← 287°	431.0	496.0	40000.0	Level	FlightAware Transoceanic
Mon 02:04:36 AM	24.2413	-177.2204	← 287°	434.0	499.0	40000.0	Level	FlightAware Transoceanic
Mon 02:06:38 AM	24.3123	-177.4714	← 287°	434.0	499.0	40000.0	Level	FlightAware Transoceanic
Mon 02:08:52 AM	24.3898	-177.7473	← 287°	434.0	499.0	40000.0	Level	FlightAware Transoceanic
Mon 02:10:13 AM	24.4364	-177.9142	← 287°	434.0	499.0	40000.0	Level	FlightAware Transoceanic
Mon 02:11:46 AM	24.4896	-178.1061	← 287°	434.0	499.0	40000.0	Level	FlightAware Transoceanic
Mon 02:12:06 AM	24.4833	-178.1	← 287°	432.0	497.0	40000.0	Level	Oakland Oceanic
Mon 02:15:08 AM	24.5932	-178.4956	← 287°	432.0	497.0	40000.0	Level	FlightAware Transoceanic
Mon 02:16:36 AM	24.6443	-178.681	← 287°	432.0	497.0	40000.0	Level	FlightAware Transoceanic
Mon 02:18:10 AM	24.6986	-178.8792	← 287°	432.0	497.0	40000.0	Level	FlightAware Transoceanic
Mon 02:20:33 AM	24.7808	-179.1811	← 287°	432.0	497.0	40000.0	Level	FlightAware Transoceanic
Mon 02:21:39 AM	24.8185	-179.3205	← 287°	432.0	497.0	40000.0	Level	FlightAware Transoceanic
Mon 02:21:42 AM	24.8167	-179.3167	← 287°	431.0	496.0	40000.0	Level	Oakland Oceanic
Mon 02:27:17 AM	25.0	180.0	← 302°	422.0	486.0	40000.0	Level	Oakland Oceanic
Mon 02:30:07 AM	25.1909	179.6571	← 302°	422.0	486.0	40000.0	Level	FlightAware Transoceanic
Mon 02:31:18 AM	25.2667	179.5333	← 301°	423.0	487.0	40000.0	Level	Oakland Oceanic
Mon 02:35:08 AM	25.5203	179.0718	← 301°	423.0	487.0	40000.0	Level	FlightAware Transoceanic
Mon 02:37:11 AM	25.6455	178.8423	← 301°	423.0	487.0	40000.0	Level	FlightAware Transoceanic
Mon 02:39:40 AM	25.7967	178.5637	← 301°	423.0	487.0	40000.0	Level	FlightAware Transoceanic
Mon 02:40:54 AM	25.8667	178.4333	← 301°	423.0	487.0	40000.0	Level	Oakland Oceanic
Mon 02:42:49 AM	25.9771	178.228	← 301°	423.0	487.0	40000.0	Level	FlightAware Transoceanic
Mon 02:44:50 AM	26.0993	178.0	← 301°	423.0	487.0	40000.0	Level	FlightAware Transoceanic
Mon 02:46:43 AM	26.213	177.7866	← 301°	423.0	487.0	40000.0	Level	FlightAware Transoceanic
Mon 02:48:05 AM	26.2954	177.6315	← 301°	423.0	487.0	40000.0	Level	FlightAware Transoceanic
Mon 02:50:07 AM	26.4176	177.4004	← 300°	423.0	487.0	40000.0	Level	FlightAware Transoceanic
Mon 02:50:30 AM	26.45	177.3333	← 300°	422.0	486.0	40000.0	Level	Oakland Oceanic
Mon 02:53:08 AM	26.6355	176.9796	← 300°	422.0	486.0	40000.0	Level	FlightAware Transoceanic
Mon 02:55:07 AM	26.7525	176.7554	← 300°	422.0	486.0	40000.0	Level	FlightAware Transoceanic
Mon 02:56:36 AM	26.8397	176.5874	← 300°	422.0	486.0	40000.0	Level	FlightAware Transoceanic
Mon 02:57:40 AM	26.9024	176.4664	← 300°	422.0	486.0	40000.0	Level	FlightAware Transoceanic
Mon 02:59:39 AM	27.0185	176.2411	← 300°	422.0	486.0	40000.0	Level	FlightAware Transoceanic
Mon 03:01:37 AM	27.1334	176.0172	← 300°	422.0	486.0	40000.0	Level	FlightAware Transoceanic
Mon 03:02:38 AM	27.1926	175.9013	← 300°	422.0	486.0	40000.0	Level	FlightAware Transoceanic
Mon 03:05:06 AM	27.3359	175.6195	← 300°	422.0	486.0	40000.0	Level	FlightAware Transoceanic
Mon 03:06:09 AM	27.3967	175.4993	← 300°	422.0	486.0	40000.0	Level	FlightAware Transoceanic
Mon 03:08:06 AM	27.5094	175.2759	← 300°	422.0	486.0	40000.0	Level	FlightAware Transoceanic
Mon 03:09:45 AM	27.5833	175.1167	← 300°	418.0	481.0	40000.0	Level	Oakland Oceanic
Mon 03:11:35 AM	27.6756	174.9327	← 299°	418.0	481.0	40000.0	Level	FlightAware Transoceanic
Mon 03:13:06 AM	27.7639	174.756	← 299°	418.0	481.0	40000.0	Level	FlightAware Transoceanic
Mon 03:14:39 AM	27.8538	174.575	← 299°	418.0	481.0	40000.0	Level	FlightAware Transoceanic
Mon 03:16:36 AM	27.9666	174.3469	← 299°	418.0	481.0	40000.0	Level	FlightAware Transoceanic
Mon 03:17:44 AM	28.0319	174.2141	← 299°	418.0	481.0	40000.0	Level	FlightAware Transoceanic
Mon 03:19:18 AM	28.1333	174.0	← 299°	416.0	479.0	40000.0	Level	Oakland Oceanic
Mon 03:21:37 AM	28.2769	173.7059	← 299°	416.0	479.0	40000.0	Level	FlightAware Transoceanic
Mon 03:23:09 AM	28.3607	173.5332	← 299°	416.0	479.0	40000.0	Level	FlightAware Transoceanic
Mon 03:25:06 AM	28.4671	173.3132	← 299°	416.0	479.0	40000.0	Level	FlightAware Transoceanic
Mon 03:26:21 AM	28.535	173.172	← 299°	416.0	479.0	40000.0	Level	FlightAware Transoceanic
Mon 03:28:08 AM	28.6318	172.9701	← 299°	416.0	479.0	40000.0	Level	FlightAware Transoceanic
Mon 03:28:54 AM	28.6667	172.9	← 299°	409.0	471.0	40000.0	Level	Oakland Oceanic
Mon 03:31:37 AM	28.8092	172.6	← 298°	409.0	471.0	40000.0	Level	FlightAware Transoceanic
Mon 03:32:42 AM	28.8679	172.4756	← 298°	409.0	471.0	40000.0	Level	FlightAware Transoceanic
Mon 03:34:38 AM	28.9726	172.2531	← 298°	409.0	471.0	40000.0	Level	FlightAware Transoceanic
Mon 03:35:38 AM	29.0265	172.1379	← 298°	409.0	471.0	40000.0	Level	FlightAware Transoceanic
Mon 03:38:03 AM	29.1566	171.8589	← 298°	409.0	471.0	40000.0	Level	FlightAware Transoceanic
Mon 03:38:31 AM	29.1833	171.8167	← 298°	406.0	467.0	40000.0	Level	Oakland Oceanic
Mon 03:41:37 AM	29.3701	171.4089	← 298°	406.0	467.0	40000.0	Level	FlightAware Transoceanic
Mon 03:43:09 AM	29.4489	171.2354	← 297°	406.0	467.0	40000.0	Level	FlightAware Transoceanic
Mon 03:45:06 AM	29.5488	171.0143	← 297°	406.0	467.0	40000.0	Level	FlightAware Transoceanic
Mon 03:46:34 AM	29.6237	170.8478	← 297°	406.0	467.0	40000.0	Level	FlightAware Transoceanic
Mon 03:48:07 AM	29.6667	170.75	← 297°	393.0	452.0	40000.0	Level	Oakland Oceanic
Mon 03:50:09 AM	29.7695	170.5202	← 297°	393.0	452.0	40000.0	Level	FlightAware Transoceanic
Mon 03:51:37 AM	29.8394	170.3631	← 297°	393.0	452.0	40000.0	Level	FlightAware Transoceanic
Mon 03:53:11 AM	29.9139	170.1951	← 297°	393.0	452.0	40000.0	Level	FlightAware Transoceanic
Mon 03:54:49 AM	29.9913	170.0197	← 297°	393.0	452.0	40000.0	Level	FlightAware Transoceanic
Mon 03:55:02 AM	30.0	170.0	← 303°	406.0	467.0	40000.0	Level	Oakland Oceanic
Mon 03:57:51 AM	30.1833	169.6833	← 303°	404.0	465.0	40000.0	Level	Oakland Oceanic
Mon 04:00:04 AM	30.3103	169.457	← 303°	404.0	465.0	40000.0	Level	FlightAware Transoceanic
Mon 04:01:37 AM	30.4053	169.2871	← 303°	404.0	465.0	40000.0	Level	FlightAware Transoceanic
Mon 04:03:19 AM	30.5093	169.1004	← 303°	404.0	465.0	40000.0	Level	FlightAware Transoceanic
Mon 04:04:37 AM	30.5886	168.9574	← 303°	404.0	465.0	40000.0	Level	FlightAware Transoceanic
Mon 04:06:44 AM	30.7174	168.724	← 303°	404.0	465.0	40000.0	Level	FlightAware Transoceanic
Mon 04:07:19 AM	30.7667	168.65	← 303°	404.0	465.0	40000.0	Level	Oakland Oceanic
Mon 04:09:39 AM	30.926	168.3582	← 302°	404.0	465.0	40000.0	Level	FlightAware Transoceanic
Mon 04:11:36 AM	31.0429	168.1429	← 302°	404.0	465.0	40000.0	Level	FlightAware Transoceanic
Mon 04:13:40 AM	31.1663	167.9141	← 302°	404.0	465.0	40000.0	Level	FlightAware Transoceanic
Mon 04:15:08 AM	31.2536	167.7514	← 302°	404.0	465.0	40000.0	Level	FlightAware Transoceanic
Mon 04:16:55 AM	31.3167	167.6	← 302°	400.0	460.0	40000.0	Level	Oakland Oceanic
Mon 04:19:00 AM	31.4349	167.3789	← 302°	400.0	460.0	40000.0	Level	FlightAware Transoceanic
Mon 04:20:04 AM	31.4977	167.2608	← 302°	400.0	460.0	40000.0	Level	FlightAware Transoceanic
Mon 04:21:38 AM	31.5899	167.087	← 302°	400.0	460.0	40000.0	Level	FlightAware Transoceanic
Mon 04:23:09 AM	31.6789	166.9185	← 302°	400.0	460.0	40000.0	Level	FlightAware Transoceanic
Mon 04:24:36 AM	31.7637	166.757	← 302°	400.0	460.0	40000.0	Level	FlightAware Transoceanic
Mon 04:26:31 AM	31.8833	166.55	← 301°	405.0	466.0	40000.0	Level	Oakland Oceanic
Mon 04:28:31 AM	32.0305	166.2656	← 301°	405.0	466.0	40000.0	Level	FlightAware Transoceanic
Mon 04:29:40 AM	32.0976	166.1354	← 301°	405.0	466.0	40000.0	Level	FlightAware Transoceanic
Mon 04:31:37 AM	32.2111	165.9141	← 301°	405.0	466.0	40000.0	Level	FlightAware Transoceanic
Mon 04:33:08 AM	32.299	165.7416	← 301°	405.0	466.0	40000.0	Level	FlightAware Transoceanic
Mon 04:35:07 AM	32.4137	165.5155	← 301°	405.0	466.0	40000.0	Level	FlightAware Transoceanic
Mon 04:36:06 AM	32.4333	165.4833	← 301°	400.0	460.0	40000.0	Level	Oakland Oceanic
Mon 04:38:07 AM	32.554	165.2431	← 301°	400.0	460.0	40000.0	Level	FlightAware Transoceanic
Mon 04:39:05 AM	32.6667	165.0	← 301°	541.0	623.0	40000.0	Level	Oakland Oceanic
Mon 07:20:23 AM	35.3578	144.5524	← 278°	373.0	429.0	40000.0	Level	FlightAware ADS-B (NRT / RJAA)
Mon 07:20:57 AM	35.3655	144.4845	← 278°	374.0	430.0	40000.0	-17 Descending	FlightAware ADS-B (NRT / RJAA)
Mon 07:21:53 AM	35.3789	144.3652	← 278°	379.0	436.0	39975.0	-16 Descending	FlightAware ADS-B (NRT / RJAA)
Mon 07:22:32 AM	35.3882	144.2828	← 278°	377.0	434.0	39975.0	10 Climbing	FlightAware ADS-B (NRT / RJAA)
Mon 07:24:25 AM	35.4149	144.0429	← 279°	378.0	435.0	40000.0	Level	FlightAware ADS-B (NJA / RJTA)
Mon 07:25:18 AM	35.4272	143.9301	← 278°	376.0	433.0	39975.0	-17 Descending	FlightAware ADS-B (NJA / RJTA)
Mon 07:25:52 AM	35.4328	143.8782	← 278°	376.0	433.0	39975.0	23 Climbing	FlightAware ADS-B (OKO / RJTY)
Mon 07:26:23 AM	35.4417	143.7963	← 278°	377.0	434.0	40000.0	25 Climbing	FlightAware ADS-B (OKO / RJTY)
Mon 07:26:53 AM	35.4487	143.7316	← 277°	380.0	437.0	40000.0	Level	FlightAware ADS-B (OKO / RJTY)
Mon 07:27:23 AM	35.4556	143.6661	← 277°	380.0	437.0	40000.0	-22 Descending	FlightAware ADS-B (OKO / RJTY)
Mon 07:28:01 AM	35.4644	143.5844	← 278°	377.0	434.0	39975.0	-19 Descending	FlightAware ADS-B (NJA / RJTA)
Mon 07:28:40 AM	35.4731	143.5025	← 277°	372.0	428.0	39975.0	19 Climbing	FlightAware ADS-B (NJA / RJTA)
Mon 07:29:18 AM	35.4791	143.4445	← 278°	368.0	423.0	40000.0	Level	FlightAware ADS-B (OKO / RJTY)
Mon 07:29:59 AM	35.4901	143.3382	← 277°	367.0	422.0	39975.0	-21 Descending	FlightAware ADS-B (OKO / RJTY)
Mon 07:30:29 AM	35.4963	143.2778	← 277°	368.0	423.0	39975.0	23 Climbing	FlightAware ADS-B (OKO / RJTY)
Mon 07:31:05 AM	35.5043	143.2015	← 277°	375.0	432.0	40000.0	22 Climbing	FlightAware ADS-B (FKS / RJSF)
Mon 07:31:38 AM	35.5112	143.1345	← 277°	379.0	436.0	40000.0	-22 Descending	FlightAware ADS-B (HND / RJTT)
Mon 07:32:13 AM	35.519	143.0568	← 278°	377.0	434.0	39975.0	Level	FlightAware ADS-B (NJA / RJTA)
Mon 07:32:45 AM	35.5257	142.9911	← 277°	378.0	435.0	40000.0	24 Climbing	FlightAware ADS-B (IBR / RJAH)
Mon 07:33:15 AM	35.5323	142.9254	← 278°	377.0	434.0	40000.0	-25 Descending	FlightAware ADS-B (NRT / RJAA)
Mon 07:33:45 AM	35.5386	142.8625	← 277°	378.0	435.0	39975.0	Level	FlightAware ADS-B (OKO / RJTY)
Mon 07:34:15 AM	35.5449	142.7992	← 278°	378.0	435.0	40000.0	25 Climbing	FlightAware ADS-B (RJTF)
Mon 07:34:46 AM	35.551	142.7392	← 278°	378.0	435.0	40000.0	Level	FlightAware ADS-B (NRT / RJAA)
Mon 07:35:15 AM	35.5573	142.6757	← 278°	378.0	435.0	40000.0	-27 Descending	FlightAware ADS-B (HND / RJTT)
Mon 07:35:41 AM	35.5629	142.6178	← 278°	375.0	432.0	39975.0	-29 Descending	FlightAware ADS-B (OKO / RJTY)
Mon 07:36:07 AM	35.5685	142.5585	← 278°	373.0	429.0	39975.0	Level	FlightAware ADS-B (HND / RJTT)
Mon 07:36:29 AM	35.5727	142.516	← 277°	375.0	432.0	39975.0	29 Climbing	FlightAware ADS-B (HND / RJTT)
Mon 07:36:59 AM	35.579	142.4512	← 277°	375.0	432.0	40000.0	Level	FlightAware ADS-B (OKO / RJTY)
Mon 07:37:27 AM	35.5836	142.4024	← 278°	373.0	429.0	39975.0	Level	FlightAware ADS-B (OKO / RJTY)
Mon 07:37:57 AM	35.5906	142.33	← 278°	375.0	432.0	40000.0	25 Climbing	FlightAware ADS-B (OKO / RJTY)
Mon 07:38:28 AM	35.597	142.2641	← 278°	376.0	433.0	40000.0	-29 Descending	FlightAware ADS-B (OKO / RJTY)
Mon 07:38:48 AM	35.601	142.2212	← 277°	376.0	433.0	39975.0	Level	FlightAware ADS-B (RJTF)
Mon 07:39:19 AM	35.6069	142.1563	← 277°	373.0	429.0	40000.0	25 Climbing	FlightAware ADS-B (RJTF)
Mon 07:39:47 AM	35.6123	142.1	← 278°	372.0	428.0	40000.0	-21 Descending	FlightAware ADS-B (OKO / RJTY)
Mon 07:40:31 AM	35.6208	142.0088	← 278°	369.0	425.0	39975.0	-20 Descending	FlightAware ADS-B (NRT / RJAA)
Mon 07:41:01 AM	35.6268	141.9442	← 276°	365.0	420.0	39975.0	Level	FlightAware ADS-B (OKO / RJTY)
Mon 07:41:19 AM	35.6302	141.9067	← 276°	365.0	420.0	39975.0	33 Climbing	FlightAware ADS-B (IBR / RJAH)
Mon 07:41:46 AM	35.6353	141.8501	← 276°	367.0	422.0	40000.0	33 Climbing	FlightAware ADS-B (RJTF)
Mon 07:42:05 AM	35.6389	141.8115	← 277°	369.0	425.0	40000.0	-23 Descending	FlightAware ADS-B (IBR / RJAH)
Mon 07:42:50 AM	35.6476	141.7142	← 276°	370.0	426.0	39975.0	-20 Descending	FlightAware ADS-B (NJA / RJTA)
Mon 07:43:20 AM	35.6531	141.6538	← 276°	369.0	425.0	39975.0	26 Climbing	FlightAware ADS-B (HND / RJTT)
Mon 07:43:48 AM	35.6581	141.5979	← 276°	369.0	425.0	40000.0	Level	FlightAware ADS-B (RJTF)
Mon 07:44:04 AM	35.6613	141.5631	← 276°	368.0	423.0	39975.0	-33 Descending	FlightAware ADS-B (IBR / RJAH)
Mon 07:44:34 AM	35.6667	141.5005	← 276°	366.0	421.0	39975.0	Level	FlightAware ADS-B (IBR / RJAH)
Mon 07:45:04 AM	35.6721	141.4393	← 276°	364.0	419.0	39975.0	28 Climbing	FlightAware ADS-B (NJA / RJTA)
Mon 07:45:28 AM	35.6765	141.3889	← 276°	366.0	421.0	40000.0	27 Climbing	FlightAware ADS-B (OKO / RJTY)
Mon 07:45:59 AM	35.682	141.3265	← 276°	367.0	422.0	40000.0	-21 Descending	FlightAware ADS-B (FKS / RJSF)
Mon 07:46:38 AM	35.6889	141.2461	← 277°	365.0	420.0	39975.0	-26 Descending	FlightAware ADS-B (HND / RJTT)
Mon 07:46:57 AM	35.6923	141.2063	← 276°	365.0	420.0	39975.0	29 Climbing	FlightAware ADS-B (NRT / RJAA)
Mon 07:47:30 AM	35.6981	141.139	← 276°	366.0	421.0	40000.0	27 Climbing	FlightAware ADS-B (RJTF)
Mon 07:47:52 AM	35.702	141.0931	← 276°	367.0	422.0	40000.0	Level	FlightAware ADS-B (IBR / RJAH)
Mon 07:48:20 AM	35.7069	141.0344	← 276°	369.0	425.0	40000.0	-25 Descending	FlightAware ADS-B (OKO / RJTY)
Mon 07:48:51 AM	35.7123	140.9704	← 276°	372.0	428.0	39975.0	Level	FlightAware ADS-B (IBR / RJAH)
Mon 07:49:19 AM	35.7173	140.9103	← 277°	371.0	427.0	40000.0	Level	FlightAware ADS-B (OKO / RJTY)
Mon 07:49:36 AM	35.7203	140.8753	← 276°	371.0	427.0	39975.0	Level	FlightAware ADS-B (NRT / RJAA)
Mon 07:49:58 AM	35.7236	140.8298	← 273°	370.0	426.0	40000.0	38 Climbing	FlightAware ADS-B (RJTF)
Mon 07:50:16 AM	35.7205	140.7905	← 258°	377.0	434.0	40000.0	Level	FlightAware ADS-B (HND / RJTT)
Mon 07:50:34 AM	35.7105	140.7543	← 246°	389.0	448.0	40000.0	Level	FlightAware ADS-B (OKO / RJTY)
Mon 07:50:57 AM	35.6937	140.7073	← 246°	390.0	449.0	40000.0	-28 Descending	FlightAware ADS-B (RJTF)
Mon 07:51:27 AM	35.6716	140.6457	← 246°	392.0	451.0	39975.0	-29 Descending	FlightAware ADS-B (HND / RJTT)
Mon 07:51:49 AM	35.6572	140.6025	← 251°	387.0	445.0	39975.0	36 Climbing	FlightAware ADS-B (RJTF)
Mon 07:52:09 AM	35.6459	140.5598	← 254°	384.0	442.0	40000.0	29 Climbing	FlightAware ADS-B (RJTF)
Mon 07:52:41 AM	35.6319	140.4967	← 256°	381.0	438.0	40000.0	Level	FlightAware ADS-B (HND / RJTT)
Mon 07:53:09 AM	35.6181	140.435	← 256°	381.0	438.0	40000.0	-32 Descending	FlightAware ADS-B (RJTF)
Mon 07:53:28 AM	35.6099	140.3981	← 256°	379.0	436.0	39975.0	Level	FlightAware ADS-B (HND / RJTT)
Mon 07:54:05 AM	35.5923	140.3193	← 255°	377.0	434.0	40000.0	22 Climbing	FlightAware ADS-B (NRT / RJAA)
Mon 07:54:36 AM	35.5782	140.2552	← 255°	380.0	437.0	40000.0	Level	FlightAware ADS-B (HND / RJTT)
Mon 07:55:06 AM	35.5641	140.1928	← 254°	379.0	436.0	40000.0	-25 Descending	FlightAware ADS-B (NJA / RJTA)
Mon 07:55:36 AM	35.5498	140.1296	← 255°	374.0	430.0	39975.0	-22 Descending	FlightAware ADS-B (NJA / RJTA)
Mon 07:56:15 AM	35.5325	140.0527	← 255°	366.0	421.0	39975.0	Level	FlightAware ADS-B (RJTF)
Mon 07:56:44 AM	35.519	139.993	← 256°	363.0	418.0	39975.0	31 Climbing	FlightAware ADS-B (RJTF)
Mon 07:57:03 AM	35.5118	139.9606	← 256°	364.0	419.0	40000.0	31 Climbing	FlightAware ADS-B (NRT / RJAA)
Mon 07:57:33 AM	35.4972	139.8961	← 255°	363.0	418.0	40000.0	-49 Descending	FlightAware ADS-B (RJTF)
Mon 07:58:04 AM	35.483	139.8347	← 254°	357.0	411.0	39950.0	Level	FlightAware ADS-B (OIM / RJTO)
Mon 07:58:34 AM	35.4699	139.7776	← 254°	357.0	411.0	40000.0	50 Climbing	FlightAware ADS-B (IBR / RJAH)
Mon 07:59:04 AM	35.4569	139.7205	← 254°	360.0	414.0	40000.0	Level	FlightAware ADS-B (RJTF)
Mon 07:59:34 AM	35.4433	139.6613	← 254°	358.0	412.0	40000.0	-25 Descending	FlightAware ADS-B (RJTF)
Mon 08:00:05 AM	35.4294	139.6005	← 254°	357.0	411.0	39975.0	-25 Descending	FlightAware ADS-B (NJA / RJTA)
Mon 08:00:35 AM	35.4154	139.5398	← 254°	355.0	409.0	39975.0	55 Climbing	FlightAware ADS-B (HND / RJTT)
Mon 08:01:00 AM	35.4049	139.4939	← 255°	360.0	414.0	40025.0	Level	FlightAware ADS-B (RJTF)
Mon 08:01:26 AM	35.3931	139.4422	← 254°	362.0	417.0	39975.0	-679 Descending	FlightAware ADS-B (NRT / RJAA)
Mon 08:01:53 AM	35.3805	139.3899	← 254°	365.0	420.0	39425.0	-1,342 Descending	FlightAware ADS-B (OKO / RJTY)
Mon 08:02:23 AM	35.3669	139.3308	← 255°	364.0	419.0	38700.0	-1,600 Descending	FlightAware ADS-B (OKO / RJTY)
Mon 08:02:53 AM	35.3524	139.268	← 254°	367.0	422.0	37825.0	-1,663 Descending	FlightAware ADS-B (IBR / RJAH)
Mon 08:03:09 AM	35.3455	139.2381	← 255°	368.0	423.0	37425.0	-1,235 Descending	FlightAware ADS-B (HND / RJTT)
Mon 08:03:44 AM	35.3291	139.1686	← 255°	370.0	426.0	36775.0	-1,154 Descending	FlightAware ADS-B (OKO / RJTY)
Mon 08:04:14 AM	35.3153	139.1097	← 254°	370.0	426.0	36175.0	-1,298 Descending	FlightAware ADS-B (RJTC)
Mon 08:04:36 AM	35.3052	139.0666	← 254°	369.0	425.0	35650.0	-1,303 Descending	FlightAware ADS-B (HND / RJTT)
Mon 08:04:52 AM	35.297	139.0325	← 254°	361.0	415.0	35350.0	-1,370 Descending	FlightAware ADS-B (HND / RJTT)
Mon 08:05:22 AM	35.2833	138.9751	← 255°	348.0	400.0	34600.0	-2,000 Descending	FlightAware ADS-B (HND / RJTT)
Mon 08:05:55 AM	35.2702	138.9179	← 255°	351.0	404.0	33250.0	-2,289 Descending	FlightAware ADS-B (OKO / RJTY)
Mon 08:06:19 AM	35.2582	138.8662	← 254°	353.0	406.0	32424.999999999996	-1,800 Descending	FlightAware ADS-B (HND / RJTT)
Mon 08:06:35 AM	35.2509	138.8354	← 254°	344.0	396.0	32049.999999999996	-554 Descending	FlightAware ADS-B (OKO / RJTY)
Mon 08:07:05 AM	35.2373	138.7802	← 254°	342.0	394.0	32000.0	-60 Descending	FlightAware ADS-B (HND / RJTT)
Mon 08:07:25 AM	35.2287	138.7433	← 256°	345.0	397.0	32000.0	Level	FlightAware ADS-B (HND / RJTT)
Mon 08:07:41 AM	35.2231	138.7132	← 259°	343.0	395.0	32000.0	-41 Descending	FlightAware ADS-B (IBR / RJAH)
Mon 08:08:02 AM	35.2178	138.673	← 263°	335.0	386.0	31975.0	-29 Descending	FlightAware ADS-B (RJNH)
Mon 08:08:32 AM	35.2118	138.6174	← 262°	333.0	383.0	31975.0	-925 Descending	FlightAware ADS-B (OKO / RJTY)
Mon 08:09:02 AM	35.2057	138.5625	← 263°	340.0	391.0	31050.0	-2,202 Descending	FlightAware ADS-B (OKO / RJTY)
Mon 08:09:19 AM	35.2016	138.5278	← 262°	354.0	407.0	30250.0	-2,700 Descending	FlightAware ADS-B (HND / RJTT)
Mon 08:09:37 AM	35.1975	138.4915	← 262°	364.0	419.0	29475.0	-2,571 Descending	FlightAware ADS-B (HND / RJTT)
Mon 08:09:54 AM	35.1936	138.4584	← 262°	365.0	420.0	28750.0	-2,824 Descending	FlightAware ADS-B (OKO / RJTY)
Mon 08:10:11 AM	35.1893	138.4211	← 263°	363.0	418.0	27875.0	-2,521 Descending	FlightAware ADS-B (HND / RJTT)
Mon 08:10:41 AM	35.1825	138.3614	← 264°	352.0	405.0	26775.0	-2,410 Descending	FlightAware ADS-B (NRT / RJAA)
Mon 08:11:12 AM	35.1758	138.3001	← 262°	359.0	413.0	25425.0	-2,647 Descending	FlightAware ADS-B (NJA / RJTA)
Mon 08:11:32 AM	35.1711	138.2603	← 262°	363.0	418.0	24525.0	-2,910 Descending	FlightAware ADS-B (OKO / RJTY)
Mon 08:12:02 AM	35.1634	138.1978	← 262°	347.0	399.0	23000.0	-2,775 Descending	FlightAware ADS-B (NJA / RJTA)
Mon 08:12:32 AM	35.1573	138.1467	← 263°	338.0	389.0	21750.0	-2,575 Descending	FlightAware ADS-B (OKO / RJTY)
Mon 08:13:02 AM	35.1507	138.0881	← 262°	327.0	376.0	20425.0	-2,625 Descending	FlightAware ADS-B (OKO / RJTY)
Mon 08:13:32 AM	35.1439	138.0335	← 262°	320.0	368.0	19125.0	-2,575 Descending	FlightAware ADS-B (OKO / RJTY)
Mon 08:14:02 AM	35.1377	137.9806	← 262°	314.0	361.0	17850.0	-2,550 Descending	FlightAware ADS-B (FSZ / RJNS)
Mon 08:14:32 AM	35.1319	137.9291	← 262°	311.0	358.0	16575.0	-2,568 Descending	FlightAware ADS-B (FSZ / RJNS)
Mon 08:15:08 AM	35.1245	137.8666	← 262°	311.0	358.0	15025.0	-2,575 Descending	FlightAware ADS-B (RJNH)
Mon 08:15:39 AM	35.1179	137.8122	← 262°	311.0	358.0	13700.0	-2,583 Descending	FlightAware ADS-B (FSZ / RJNS)
Mon 08:16:02 AM	35.1127	137.7729	← 258°	311.0	358.0	12700.0	-1,418 Descending	FlightAware ADS-B (RJNH)
Mon 08:16:52 AM	35.0784	137.6949	↙ 237°	316.0	364.0	11975.0	-537 Descending	FlightAware ADS-B (NKM / RJNA)
Mon 08:17:23 AM	35.0536	137.6479	↙ 237°	316.0	364.0	11975.0	Level	FlightAware ADS-B (NKM / RJNA)
Mon 08:17:53 AM	35.0303	137.6034	↙ 238°	316.0	364.0	11975.0	Level	FlightAware ADS-B (NKM / RJNA)
Mon 08:18:17 AM	35.0109	137.5665	↙ 234°	317.0	365.0	11975.0	Level	FlightAware ADS-B (RJNH)
Mon 08:18:49 AM	34.98	137.5247	↙ 227°	322.0	371.0	11975.0	Level	FlightAware ADS-B (NKM / RJNA)
Mon 08:19:16 AM	34.9513	137.4882	↙ 228°	321.0	369.0	11975.0	-337 Descending	FlightAware ADS-B (NKM / RJNA)
Mon 08:19:38 AM	34.9293	137.4599	↙ 227°	319.0	367.0	11700.0	-606 Descending	FlightAware ADS-B (RJNH)
Mon 08:20:08 AM	34.9004	137.4233	↙ 226°	296.0	341.0	11450.0	-540 Descending	FlightAware ADS-B (NGO / RJGG)
Mon 08:20:28 AM	34.8813	137.3995	↙ 226°	281.0	323.0	11250.0	-512 Descending	FlightAware ADS-B (RJNH)
Mon 08:20:49 AM	34.8626	137.3767	↙ 225°	268.0	308.0	11100.0	-669 Descending	FlightAware ADS-B (NKM / RJNA)
Mon 08:21:33 AM	34.825	137.3321	↙ 224°	250.0	288.0	10525.0	-1,055 Descending	FlightAware ADS-B (RJNH)
Mon 08:21:53 AM	34.8079	137.3125	↙ 223°	253.0	291.0	9975.0	-1,720 Descending	FlightAware ADS-B (RJNH)
Mon 08:22:14 AM	34.79	137.2913	↙ 225°	257.0	296.0	9350.0	-1,643 Descending	FlightAware ADS-B (NKM / RJNA)
Mon 08:22:35 AM	34.7714	137.2685	↙ 227°	257.0	296.0	8825.0	-1,125 Descending	FlightAware ADS-B (NGO / RJGG)
Mon 08:22:54 AM	34.7563	137.2497	↙ 226°	250.0	288.0	8600.0	-527 Descending	FlightAware ADS-B (RJNH)
Mon 08:23:12 AM	34.7422	137.2323	↙ 227°	239.0	275.0	8500.0	-353 Descending	FlightAware ADS-B (NGO / RJGG)
Mon 08:23:28 AM	34.7303	137.2173	↙ 226°	231.0	266.0	8400.0	-717 Descending	FlightAware ADS-B (RJNH)
Mon 08:23:58 AM	34.7077	137.189	↙ 226°	228.0	262.0	7950.0	-895 Descending	FlightAware ADS-B (NKM / RJNA)
Mon 08:24:25 AM	34.6884	137.166	↙ 224°	226.0	260.0	7550.0	-913 Descending	FlightAware ADS-B (RJNH)
Mon 08:24:44 AM	34.6734	137.1485	↙ 224°	226.0	260.0	7250.0	-947 Descending	FlightAware ADS-B (RJNH)
Mon 08:25:03 AM	34.6592	137.1316	↙ 226°	221.0	254.0	6950.0	-815 Descending	FlightAware ADS-B (NGO / RJGG)
Mon 08:25:30 AM	34.643	137.112	↙ 226°	214.0	246.0	6625.0	-698 Descending	FlightAware ADS-B (NGO / RJGG)
Mon 08:25:46 AM	34.6284	137.0948	↙ 224°	207.0	238.0	6450.0	-786 Descending	FlightAware ADS-B (NGO / RJGG)
Mon 08:26:12 AM	34.6121	137.0761	↙ 224°	199.0	229.0	6075.0	-804 Descending	FlightAware ADS-B (NGO / RJGG)
Mon 08:26:42 AM	34.5913	137.0513	↙ 226°	193.0	222.0	5700.0	-1,000 Descending	FlightAware ADS-B (NGO / RJGG)
Mon 08:27:12 AM	34.5731	137.0289	↙ 226°	193.0	222.0	5075.0	-969 Descending	FlightAware ADS-B (NGO / RJGG)
Mon 08:27:47 AM	34.5517	137.0028	↙ 225°	191.0	220.0	4650.0	-684 Descending	FlightAware ADS-B (NGO / RJGG)
Mon 08:28:20 AM	34.5312	136.9782	↙ 225°	180.0	207.0	4300.0	-566 Descending	FlightAware ADS-B (RJNH)
Mon 08:28:40 AM	34.5192	136.9639	↙ 226°	169.0	194.0	4150.0	-538 Descending	FlightAware ADS-B (NGO / RJGG)
Mon 08:28:59 AM	34.5117	136.9504	← 252°	154.0	177.0	3950.0	-500 Descending	FlightAware ADS-B (NKM / RJNA)
Mon 08:29:22 AM	34.5086	136.9314	← 265°	139.0	160.0	3800.0	-525 Descending	FlightAware ADS-B (NGO / RJGG)
Mon 08:29:39 AM	34.5112	136.9191	← 306°	148.0	170.0	3600.0	-542 Descending	FlightAware ADS-B (NKM / RJNA)
Mon 08:29:58 AM	34.5228	136.9096	↖ 334°	159.0	183.0	3475.0	-153 Descending	FlightAware ADS-B (NGO / RJGG)
Mon 08:30:28 AM	34.543	136.8975	↖ 334°	154.0	177.0	3475.0	Level	FlightAware ADS-B (NGO / RJGG)
Mon 08:30:45 AM	34.553	136.8913	↖ 333°	155.0	178.0	3475.0	Level	FlightAware ADS-B (NKM / RJNA)
Mon 08:31:05 AM	34.5658	136.8832	↖ 332°	155.0	178.0	3475.0	Level	FlightAware ADS-B (NKM / RJNA)
Mon 08:31:25 AM	34.5788	136.8748	↖ 332°	160.0	184.0	3475.0	Level	FlightAware ADS-B (NKM / RJNA)
Mon 08:31:45 AM	34.5918	136.867	↑ 340°	164.0	189.0	3475.0	Level	FlightAware ADS-B (NGO / RJGG)
Mon 08:32:02 AM	34.6045	136.8633	↑ 350°	172.0	198.0	3475.0	Level	FlightAware ADS-B (NGO / RJGG)
Mon 08:32:23 AM	34.6216	136.8596	↑ 350°	170.0	196.0	3475.0	Level	FlightAware ADS-B (NKM / RJNA)
Mon 08:32:41 AM	34.6347	136.8566	↑ 351°	166.0	191.0	3475.0	Level	FlightAware ADS-B (NGO / RJGG)
Mon 08:33:02 AM	34.6506	136.853	↑ 350°	165.0	190.0	3475.0	Level	FlightAware ADS-B (NGO / RJGG)
Mon 08:33:21 AM	34.6647	136.8498	↑ 350°	157.0	181.0	3475.0	-41 Descending	FlightAware ADS-B (NGO / RJGG)
Mon 08:33:39 AM	34.6775	136.8468	↑ 349°	158.0	182.0	3450.0	-500 Descending	FlightAware ADS-B (NGO / RJGG)
Mon 08:33:57 AM	34.6907	136.8439	↑ 350°	160.0	184.0	3175.0	-962 Descending	FlightAware ADS-B (NGO / RJGG)
Mon 08:34:18 AM	34.7058	136.8404	↑ 350°	161.0	185.0	2825.0	-946 Descending	FlightAware ADS-B (NKM / RJNA)
Mon 08:34:43 AM	34.7243	136.8363	↑ 350°	155.0	178.0	2450.0	-868 Descending	FlightAware ADS-B (NKM / RJNA)
Mon 08:35:15 AM	34.746	136.8313	↑ 349°	152.0	175.0	2000.0	-847 Descending	FlightAware ADS-B (NGO / RJGG)
Mon 08:35:45 AM	34.7674	136.8264	↑ 350°	155.0	178.0	1575.0	-848 Descending	FlightAware ADS-B (NKM / RJNA)
Mon 08:36:01 AM	34.7781	136.824	↑ 349°	152.0	175.0	1350.0	-833 Descending	FlightAware ADS-B (NKM / RJNA)
Mon 08:36:21 AM	34.7918	136.8209	↑ 350°	150.0	173.0	1075.0	-833 Descending	FlightAware ADS-B (NKM / RJNA)
Mon 08:36:37 AM	34.8029	136.8184	↑ 349°	151.0	174.0	850.0	-671 Descending	FlightAware ADS-B (NKM / RJNA)
Mon 08:36:59 AM	34.8179	136.8149	↑ 350°	150.0	173.0	650.0	-632 Descending	FlightAware ADS-B (NGO / RJGG)
Mon 08:37:15 AM	34.8292	136.8124	↑ 350°	146.0	168.0	450.0	-750 Descending	FlightAware ADS-B (NGO / RJGG)
