# Supplementary material for: TrackMatcher – a tool for finding intercepts in tracks of geographical positions
Source: Copernicus journal article supplement (doi:10.5194/gmd-15-7557-2022), 2022-10-18
Supplement: Supplementary file 1 [file gmd-15-7557-2022-supplement.zip › ESM/example/data/flights/JAL794_27-JAN-2019_RJGG-PHNL.dat]

Time (CET)	Latitude	Longitude	Course	kts	mph	feet	Rate	Reporting Facility
Sun 02:52:16 PM	34.88	136.8004	↑ 349°	162.0	186.0	450.0	Level	FlightAware ADS-B (NGO / RJGG)
Sun 02:52:33 PM	34.8908	136.792	← 307°	165.0	190.0	1275.0	2,500 Climbing	FlightAware ADS-B (NGO / RJGG)
Sun 02:52:49 PM	34.8937	136.7783	← 264°	171.0	197.0	1825.0	1,909 Climbing	FlightAware ADS-B (NKM / RJNA)
Sun 02:53:06 PM	34.8868	136.7639	↙ 224°	179.0	206.0	2325.0	2,206 Climbing	FlightAware ADS-B (NGO / RJGG)
Sun 02:53:23 PM	34.875	136.7523	↙ 219°	183.0	211.0	3075.0	2,045 Climbing	FlightAware ADS-B (NGO / RJGG)
Sun 02:53:39 PM	34.8641	136.7418	↙ 219°	199.0	229.0	3450.0	1,172 Climbing	FlightAware ADS-B (NKM / RJNA)
Sun 02:53:55 PM	34.8529	136.7309	↙ 220°	220.0	253.0	3700.0	1,045 Climbing	FlightAware ADS-B (NKM / RJNA)
Sun 02:54:12 PM	34.8404	136.7192	↙ 214°	243.0	280.0	4025.0000000000005	1,500 Climbing	FlightAware ADS-B (NKM / RJNA)
Sun 02:54:31 PM	34.8137	136.7137	↓ 171°	272.0	313.0	4600.0	2,288 Climbing	FlightAware ADS-B (NGO / RJGG)
Sun 02:54:52 PM	34.7882	136.721	↓ 167°	278.0	320.0	5550.0	2,513 Climbing	FlightAware ADS-B (NGO / RJGG)
Sun 02:55:11 PM	34.7651	136.7327	↘ 143°	288.0	331.0	6275.0	2,500 Climbing	FlightAware ADS-B (NGO / RJGG)
Sun 02:55:28 PM	34.7513	136.7536	↘ 119°	293.0	337.0	7050.0	2,550 Climbing	FlightAware ADS-B (NGO / RJGG)
Sun 02:55:51 PM	34.7358	136.788	↘ 119°	300.0	345.0	7975.0	2,500 Climbing	FlightAware ADS-B (NGO / RJGG)
Sun 02:56:07 PM	34.7258	136.8099	↘ 119°	303.0	349.0	8675.0	2,262 Climbing	FlightAware ADS-B (NGO / RJGG)
Sun 02:56:52 PM	34.6938	136.8803	↘ 119°	328.0	377.0	10275.0	1,622 Climbing	FlightAware ADS-B (RJNH)
Sun 02:57:21 PM	34.6765	136.9315	→ 105°	356.0	410.0	10675.0	1,114 Climbing	FlightAware ADS-B (NGO / RJGG)
Sun 02:58:02 PM	34.6659	137.015	→ 98°	385.0	443.0	11575.0	1,838 Climbing	FlightAware ADS-B (NGO / RJGG)
Sun 02:58:32 PM	34.6582	137.0803	→ 98°	394.0	453.0	12850.0	2,075 Climbing	FlightAware ADS-B (NGO / RJGG)
Sun 02:59:02 PM	34.6503	137.1474	→ 98°	404.0	465.0	13650.0	1,900 Climbing	FlightAware ADS-B (NGO / RJGG)
Sun 02:59:32 PM	34.6424	137.2154	→ 97°	413.0	475.0	14750.0	2,075 Climbing	FlightAware ADS-B (NGO / RJGG)
Sun 03:00:02 PM	34.6365	137.2843	→ 95°	421.0	484.0	15725.0	1,850 Climbing	FlightAware ADS-B (NGO / RJGG)
Sun 03:00:32 PM	34.6325	137.3469	→ 94°	429.0	494.0	16600.0	1,850 Climbing	FlightAware ADS-B (NGO / RJGG)
Sun 03:01:02 PM	34.6272	137.4283	→ 95°	439.0	505.0	17575.0	1,775 Climbing	FlightAware ADS-B (NGO / RJGG)
Sun 03:01:32 PM	34.6225	137.4987	→ 94°	446.0	513.0	18375.0	1,750 Climbing	FlightAware ADS-B (NGO / RJGG)
Sun 03:02:02 PM	34.6172	137.5796	→ 95°	452.0	520.0	19325.0	1,820 Climbing	FlightAware ADS-B (NGO / RJGG)
Sun 03:02:33 PM	34.6124	137.6507	→ 95°	456.0	525.0	20225.0	1,766 Climbing	FlightAware ADS-B (UKB / RJBE)
Sun 03:03:04 PM	34.6068	137.7327	→ 95°	467.0	537.0	21150.0	1,598 Climbing	FlightAware ADS-B (HND / RJTT)
Sun 03:03:34 PM	34.6011	137.8169	→ 95°	478.0	550.0	21850.0	1,426 Climbing	FlightAware ADS-B (NJA / RJTA)
Sun 03:04:05 PM	34.5954	137.9009	→ 95°	480.0	552.0	22600.0	1,258 Climbing	FlightAware ADS-B (NGO / RJGG)
Sun 03:04:36 PM	34.5898	137.9823	→ 95°	496.0	571.0	23150.0	1,328 Climbing	FlightAware ADS-B (OKO / RJTY)
Sun 03:05:06 PM	34.5835	138.0712	→ 95°	503.0	579.0	23950.0	1,650 Climbing	FlightAware ADS-B (MMJ / RJAF)
Sun 03:05:36 PM	34.5773	138.1567	→ 95°	506.0	582.0	24800.0	1,597 Climbing	FlightAware ADS-B (MMJ / RJAF)
Sun 03:06:08 PM	34.571	138.2471	→ 95°	511.0	588.0	25600.0	1,355 Climbing	FlightAware ADS-B (RJNH)
Sun 03:06:38 PM	34.5647	138.3322	→ 95°	515.0	593.0	26200.0	1,200 Climbing	FlightAware ADS-B (OKO / RJTY)
Sun 03:07:08 PM	34.5585	138.4169	→ 95°	521.0	600.0	26800.0	1,156 Climbing	FlightAware ADS-B (HND / RJTT)
Sun 03:07:39 PM	34.5518	138.5076	→ 95°	528.0	608.0	27375.0	1,107 Climbing	FlightAware ADS-B (HND / RJTT)
Sun 03:08:09 PM	34.5452	138.5967	→ 95°	534.0	615.0	27925.0	975 Climbing	FlightAware ADS-B (OKO / RJTY)
Sun 03:08:39 PM	34.5385	138.686	→ 95°	541.0	623.0	28350.0	950 Climbing	FlightAware ADS-B (OKO / RJTY)
Sun 03:09:09 PM	34.5316	138.7782	→ 95°	546.0	628.0	28875.0	1,100 Climbing	FlightAware ADS-B (OKO / RJTY)
Sun 03:09:39 PM	34.5243	138.8739	→ 95°	550.0	633.0	29450.0	1,131 Climbing	FlightAware ADS-B (RJNH)
Sun 03:10:10 PM	34.5174	138.9645	→ 95°	553.0	636.0	30025.0	1,057 Climbing	FlightAware ADS-B (OKO / RJTY)
Sun 03:10:40 PM	34.5099	139.0577	→ 96°	556.0	640.0	30525.0	934 Climbing	FlightAware ADS-B (OKO / RJTY)
Sun 03:11:11 PM	34.502	139.1551	→ 96°	560.0	644.0	30975.0	738 Climbing	FlightAware ADS-B (RJNH)
Sun 03:11:41 PM	34.4943	139.2499	→ 96°	568.0	654.0	31275.0	650 Climbing	FlightAware ADS-B (RJNH)
Sun 03:12:11 PM	34.4869	139.3414	→ 96°	573.0	659.0	31625.0	875 Climbing	FlightAware ADS-B (RJNH)
Sun 03:12:41 PM	34.4789	139.4384	→ 96°	576.0	663.0	32150.0	950 Climbing	FlightAware ADS-B (RJNH)
Sun 03:13:11 PM	34.471	139.5349	→ 96°	579.0	666.0	32575.000000000004	750 Climbing	FlightAware ADS-B (OKO / RJTY)
Sun 03:13:41 PM	34.463	139.6319	→ 96°	585.0	673.0	32900.0	850 Climbing	FlightAware ADS-B (OKO / RJTY)
Sun 03:14:11 PM	34.4545	139.7318	→ 96°	588.0	677.0	33425.0	900 Climbing	FlightAware ADS-B (OKO / RJTY)
Sun 03:14:41 PM	34.4464	139.8283	→ 96°	593.0	682.0	33800.0	875 Climbing	FlightAware ADS-B (FKS / RJSF)
Sun 03:15:11 PM	34.4377	139.9292	→ 96°	593.0	682.0	34300.0	1,150 Climbing	FlightAware ADS-B (OKO / RJTY)
Sun 03:15:41 PM	34.4293	140.0254	→ 96°	592.0	681.0	34950.0	1,375 Climbing	FlightAware ADS-B (HND / RJTT)
Sun 03:16:11 PM	34.4205	140.1273	→ 96°	589.0	678.0	35675.0	1,550 Climbing	FlightAware ADS-B (FKS / RJSF)
Sun 03:16:41 PM	34.4124	140.2224	→ 96°	583.0	671.0	36500.0	1,250 Climbing	FlightAware ADS-B (RJTF)
Sun 03:17:11 PM	34.4034	140.323	→ 96°	584.0	672.0	36925.0	775 Climbing	FlightAware ADS-B (IBR / RJAH)
Sun 03:17:41 PM	34.3948	140.4183	→ 96°	587.0	676.0	37275.0	800 Climbing	FlightAware ADS-B (OKO / RJTY)
Sun 03:18:11 PM	34.3862	140.513	→ 96°	585.0	673.0	37725.0	600 Climbing	FlightAware ADS-B (HND / RJTT)
Sun 03:18:41 PM	34.3772	140.611	→ 97°	592.0	681.0	37875.0	443 Climbing	FlightAware ADS-B (HND / RJTT)
Sun 03:19:12 PM	34.3676	140.7142	→ 97°	596.0	686.0	38175.0	566 Climbing	FlightAware ADS-B (OKO / RJTY)
Sun 03:19:42 PM	34.358	140.8161	→ 97°	599.0	689.0	38450.0	450 Climbing	FlightAware ADS-B (NRT / RJAA)
Sun 03:20:12 PM	34.3487	140.9141	→ 97°	603.0	694.0	38625.0	325 Climbing	FlightAware ADS-B (HND / RJTT)
Sun 03:20:42 PM	34.3388	141.0182	→ 97°	608.0	700.0	38775.0	344 Climbing	FlightAware ADS-B (OKO / RJTY)
Sun 03:21:13 PM	34.3292	141.1185	→ 97°	610.0	702.0	38975.0	197 Climbing	FlightAware ADS-B (HND / RJTT)
Sun 03:21:43 PM	34.3192	141.2237	→ 97°	609.0	701.0	38975.0	Level	FlightAware ADS-B (HND / RJTT)
Sun 03:22:13 PM	34.3093	141.3265	→ 97°	604.0	695.0	38975.0	25 Climbing	FlightAware ADS-B (IBR / RJAH)
Sun 03:22:44 PM	34.2998	141.4243	→ 97°	602.0	693.0	39000.0	Level	FlightAware ADS-B (RJTF)
Sun 03:23:14 PM	34.2897	141.5259	→ 97°	600.0	690.0	38975.0	-23 Descending	FlightAware ADS-B (NJA / RJTA)
Sun 03:23:49 PM	34.2777	141.6467	→ 97°	598.0	688.0	38975.0	23 Climbing	FlightAware ADS-B (IBR / RJAH)
Sun 03:24:19 PM	34.2676	141.7456	→ 97°	598.0	688.0	39000.0	25 Climbing	FlightAware ADS-B (IBR / RJAH)
Sun 03:24:49 PM	34.2581	141.839	→ 97°	598.0	688.0	39000.0	Level	FlightAware ADS-B (NRT / RJAA)
Sun 03:25:19 PM	34.2479	141.9385	→ 97°	596.0	686.0	39000.0	-25 Descending	FlightAware ADS-B (NRT / RJAA)
Sun 03:25:49 PM	34.2373	142.0407	→ 97°	597.0	687.0	38975.0	Level	FlightAware ADS-B (IBR / RJAH)
Sun 03:26:24 PM	34.2255	142.1549	→ 97°	597.0	687.0	39000.0	Level	FlightAware ADS-B (NJA / RJTA)
Sun 03:26:54 PM	34.215	142.2536	→ 97°	598.0	688.0	38975.0	Level	FlightAware ADS-B (NJA / RJTA)
Sun 03:27:24 PM	34.2044	142.3533	→ 97°	598.0	688.0	39000.0	Level	FlightAware ADS-B (NJA / RJTA)
Sun 03:27:55 PM	34.1938	142.4526	→ 97°	600.0	690.0	38975.0	Level	FlightAware ADS-B (NJA / RJTA)
Sun 03:28:39 PM	34.178	142.5993	→ 97°	599.0	689.0	39000.0	19 Climbing	FlightAware ADS-B (OKO / RJTY)
Sun 03:29:15 PM	34.165	142.7183	→ 98°	596.0	686.0	39000.0	-20 Descending	FlightAware ADS-B (FKS / RJSF)
Sun 03:29:55 PM	34.1509	142.8476	→ 98°	596.0	686.0	38975.0	Level	FlightAware ADS-B (NJA / RJTA)
Sun 03:30:25 PM	34.1396	142.9496	→ 98°	596.0	686.0	39000.0	Level	FlightAware ADS-B (NJA / RJTA)
Sun 03:30:55 PM	34.1284	143.0478	→ 98°	596.0	686.0	38975.0	-23 Descending	FlightAware ADS-B (NJA / RJTA)
Sun 03:31:30 PM	34.1091	143.1603	→ 105°	598.0	688.0	38975.0	Level	FlightAware ADS-B (IBR / RJAH)
Sun 03:32:13 PM	34.0721	143.2952	→ 109°	596.0	686.0	38975.0	11 Climbing	FlightAware ADS-B (NJA / RJTA)
Sun 03:33:43 PM	33.9885	143.5794	→ 109°	592.0	681.0	39000.0	Level	FlightAware ADS-B (NRT / RJAA)
Sun 05:23:50 PM	32.1	165.9	→ 91°	627.0	722.0	39000.0	Level	Oakland Oceanic
Sun 05:26:01 PM	32.0959	166.3137	→ 91°	627.0	722.0	39000.0	Level	FlightAware Transoceanic
Sun 05:28:04 PM	32.0904	166.7343	→ 91°	627.0	722.0	39000.0	Level	FlightAware Transoceanic
Sun 05:29:17 PM	32.0864	166.9839	→ 91°	627.0	722.0	39000.0	Level	FlightAware Transoceanic
Sun 05:32:20 PM	32.0744	167.6094	→ 91°	627.0	722.0	39000.0	265 Climbing	FlightAware Transoceanic
Sun 05:33:26 PM	32.0667	167.85	→ 92°	617.0	710.0	40100.0	258 Climbing	Oakland Oceanic
Sun 05:36:36 PM	32.0489	168.554	→ 92°	617.0	710.0	40100.0	Level	FlightAware Transoceanic
Sun 05:38:09 PM	32.04	168.857	→ 92°	617.0	710.0	40100.0	Level	FlightAware Transoceanic
Sun 05:39:45 PM	32.0301	169.1697	→ 92°	617.0	710.0	40100.0	Level	FlightAware Transoceanic
Sun 05:41:35 PM	32.0178	169.5279	→ 92°	617.0	710.0	40100.0	Level	FlightAware Transoceanic
Sun 05:42:54 PM	32.0083	169.7851	→ 93°	617.0	710.0	40100.0	-70 Descending	FlightAware Transoceanic
Sun 05:43:01 PM	32.0167	169.75	→ 94°	609.0	701.0	40000.0	-42 Descending	Oakland Oceanic
Sun 05:45:17 PM	31.9833	170.2	→ 94°	602.0	693.0	40000.0	Level	Oakland Oceanic
Sun 05:48:05 PM	31.9453	170.7977	→ 94°	602.0	693.0	40000.0	Level	FlightAware Transoceanic
Sun 05:50:06 PM	31.9189	171.1884	→ 95°	602.0	693.0	40000.0	Level	FlightAware Transoceanic
Sun 05:51:22 PM	31.9017	171.4337	→ 95°	602.0	693.0	40000.0	Level	FlightAware Transoceanic
Sun 05:52:38 PM	31.8833	171.65	→ 95°	604.0	695.0	40000.0	Level	Oakland Oceanic
Sun 05:55:05 PM	31.8524	172.0676	→ 95°	604.0	695.0	40000.0	Level	FlightAware Transoceanic
Sun 05:56:36 PM	31.829	172.3714	→ 95°	604.0	695.0	40000.0	Level	FlightAware Transoceanic
Sun 05:58:08 PM	31.8046	172.6784	→ 95°	604.0	695.0	40000.0	Level	FlightAware Transoceanic
Sun 05:59:50 PM	31.7767	173.0186	→ 96°	604.0	695.0	40000.0	Level	FlightAware Transoceanic
Sun 06:01:37 PM	31.7465	173.3752	→ 96°	604.0	695.0	40000.0	Level	FlightAware Transoceanic
Sun 06:02:14 PM	31.7333	173.55	→ 96°	603.0	694.0	40000.0	Level	Oakland Oceanic
Sun 06:05:05 PM	31.6785	174.1567	→ 96°	603.0	694.0	40000.0	Level	FlightAware Transoceanic
Sun 06:06:37 PM	31.6502	174.4581	→ 96°	603.0	694.0	40000.0	Level	FlightAware Transoceanic
Sun 06:08:03 PM	31.6231	174.7397	→ 97°	603.0	694.0	40000.0	Level	FlightAware Transoceanic
Sun 06:10:12 PM	31.5814	175.1618	→ 97°	603.0	694.0	40000.0	Level	FlightAware Transoceanic
Sun 06:11:50 PM	31.55	175.4333	→ 97°	602.0	693.0	40000.0	Level	Oakland Oceanic
Sun 06:14:28 PM	31.4988	175.9253	→ 97°	602.0	693.0	40000.0	Level	FlightAware Transoceanic
Sun 06:16:35 PM	31.4533	176.3472	→ 97°	602.0	693.0	40000.0	Level	FlightAware Transoceanic
Sun 06:18:49 PM	31.4039	176.792	→ 98°	602.0	693.0	40000.0	Level	FlightAware Transoceanic
Sun 06:20:03 PM	31.3759	177.0374	→ 98°	602.0	693.0	40000.0	Level	FlightAware Transoceanic
Sun 06:21:26 PM	31.35	177.3	→ 98°	604.0	695.0	40000.0	Level	Oakland Oceanic
Sun 06:25:07 PM	31.2529	178.096	→ 98°	604.0	695.0	40000.0	Level	FlightAware Transoceanic
Sun 06:27:02 PM	31.2061	178.466	→ 99°	604.0	695.0	40000.0	Level	FlightAware Transoceanic
Sun 06:28:04 PM	31.1804	178.6653	→ 99°	604.0	695.0	40000.0	Level	FlightAware Transoceanic
Sun 06:30:05 PM	31.1293	179.0541	→ 99°	604.0	695.0	40000.0	Level	FlightAware Transoceanic
Sun 06:31:02 PM	31.1167	179.1333	→ 99°	595.0	685.0	40000.0	Level	Oakland Oceanic
Sun 06:33:07 PM	31.0557	179.5921	→ 99°	595.0	685.0	40000.0	Level	FlightAware Transoceanic
Sun 06:35:26 PM	30.9805	-179.9231	→ 107°	595.0	685.0	40000.0	205 Climbing	FlightAware Transoceanic
Sun 06:35:33 PM	31.0	180.0	→ 107°	592.0	681.0	40500.0	188 Climbing	Oakland Oceanic
Sun 06:38:06 PM	30.8541	-179.4311	→ 107°	592.0	681.0	40500.0	Level	FlightAware Transoceanic
Sun 06:39:38 PM	30.7809	-179.1503	→ 107°	592.0	681.0	40500.0	197 Climbing	FlightAware Transoceanic
Sun 06:40:38 PM	30.7667	-179.0833	→ 107°	587.0	676.0	41000.0	120 Climbing	Oakland Oceanic
Sun 06:43:47 PM	30.632	-178.5746	→ 107°	587.0	676.0	41000.0	Level	FlightAware Transoceanic
Sun 06:45:06 PM	30.5676	-178.3347	→ 107°	587.0	676.0	41000.0	Level	FlightAware Transoceanic
Sun 06:46:10 PM	30.5151	-178.1405	→ 107°	587.0	676.0	41000.0	Level	FlightAware Transoceanic
Sun 06:48:04 PM	30.4209	-177.7951	→ 108°	587.0	676.0	41000.0	Level	FlightAware Transoceanic
Sun 06:49:15 PM	30.3617	-177.5804	→ 108°	587.0	676.0	41000.0	Level	FlightAware Transoceanic
Sun 06:50:14 PM	30.3	-177.35	→ 108°	588.0	677.0	41000.0	Level	Oakland Oceanic
Sun 06:52:04 PM	30.1964	-176.9807	→ 108°	588.0	677.0	41000.0	Level	FlightAware Transoceanic
Sun 06:53:07 PM	30.1434	-176.7933	→ 108°	588.0	677.0	41000.0	Level	FlightAware Transoceanic
Sun 06:54:39 PM	30.0655	-176.5201	→ 108°	588.0	677.0	41000.0	Level	FlightAware Transoceanic
Sun 06:56:36 PM	29.9656	-176.1733	→ 108°	588.0	677.0	41000.0	Level	FlightAware Transoceanic
Sun 06:58:44 PM	29.8553	-175.7946	→ 109°	588.0	677.0	41000.0	Level	FlightAware Transoceanic
Sun 06:59:50 PM	29.8	-175.6167	→ 109°	590.0	679.0	41000.0	Level	Oakland Oceanic
Sun 07:02:33 PM	29.6652	-175.1623	→ 109°	590.0	679.0	41000.0	Level	FlightAware Transoceanic
Sun 07:04:00 PM	29.5879	-174.9042	→ 109°	590.0	679.0	41000.0	Level	FlightAware Transoceanic
Sun 07:05:06 PM	29.5289	-174.7088	→ 109°	590.0	679.0	41000.0	Level	FlightAware Transoceanic
Sun 07:06:44 PM	29.4408	-174.4189	→ 109°	590.0	679.0	41000.0	Level	FlightAware Transoceanic
Sun 07:08:20 PM	29.3539	-174.1355	→ 109°	590.0	679.0	41000.0	Level	FlightAware Transoceanic
Sun 07:09:26 PM	29.2833	-173.9	→ 109°	591.0	680.0	41000.0	Level	Oakland Oceanic
Sun 07:19:02 PM	28.75	-172.2167	↘ 111°	588.0	677.0	41000.0	Level	Oakland Oceanic
Sun 07:21:50 PM	28.5896	-171.7311	↘ 111°	588.0	677.0	41000.0	Level	FlightAware Transoceanic
Sun 07:23:07 PM	28.5164	-171.5116	↘ 111°	588.0	677.0	41000.0	Level	FlightAware Transoceanic
Sun 07:25:12 PM	28.3968	-171.1558	↘ 111°	588.0	677.0	41000.0	Level	FlightAware Transoceanic
Sun 07:26:12 PM	28.339	-170.9853	↘ 111°	588.0	677.0	41000.0	Level	FlightAware Transoceanic
Sun 07:28:04 PM	28.2307	-170.6675	↘ 111°	588.0	677.0	41000.0	Level	FlightAware Transoceanic
Sun 07:28:38 PM	28.1833	-170.55	↘ 111°	579.0	666.0	41000.0	Level	Oakland Oceanic
Sun 07:31:51 PM	28.0	-170.0	↘ 119°	590.0	679.0	41000.0	Level	Oakland Oceanic
Sun 07:34:36 PM	27.7927	-169.5719	↘ 119°	590.0	679.0	41000.0	Level	FlightAware Transoceanic
Sun 07:36:35 PM	27.6336	-169.2465	↘ 119°	590.0	679.0	41000.0	Level	FlightAware Transoceanic
Sun 07:37:42 PM	27.5437	-169.0637	↘ 119°	590.0	679.0	41000.0	Level	FlightAware Transoceanic
Sun 07:38:14 PM	27.5	-168.9667	↘ 119°	588.0	677.0	41000.0	Level	Oakland Oceanic
Sun 07:40:52 PM	27.2739	-168.512	↘ 119°	588.0	677.0	41000.0	Level	FlightAware Transoceanic
Sun 07:43:07 PM	27.0954	-168.1562	↘ 120°	588.0	677.0	41000.0	Level	FlightAware Transoceanic
Sun 07:45:05 PM	26.9386	-167.8461	↘ 120°	588.0	677.0	41000.0	Level	FlightAware Transoceanic
Sun 07:46:37 PM	26.8159	-167.6049	↘ 120°	588.0	677.0	41000.0	Level	FlightAware Transoceanic
Sun 07:47:49 PM	26.7333	-167.4667	↘ 120°	583.0	671.0	41000.0	Level	Oakland Oceanic
Sun 07:50:10 PM	26.5573	-167.1231	↘ 120°	583.0	671.0	41000.0	Level	FlightAware Transoceanic
Sun 07:51:35 PM	26.4417	-166.8988	↘ 120°	583.0	671.0	41000.0	Level	FlightAware Transoceanic
Sun 07:53:41 PM	26.2698	-166.5671	↘ 120°	583.0	671.0	41000.0	Level	FlightAware Transoceanic
Sun 07:55:06 PM	26.1534	-166.3439	↘ 120°	583.0	671.0	41000.0	Level	FlightAware Transoceanic
Sun 07:56:50 PM	26.0105	-166.0714	↘ 120°	583.0	671.0	41000.0	Level	FlightAware Transoceanic
Sun 07:57:26 PM	25.9667	-165.9833	↘ 120°	580.0	667.0	41000.0	Level	Oakland Oceanic
Sun 07:59:50 PM	25.7347	-165.5454	↘ 121°	580.0	667.0	41000.0	Level	FlightAware Transoceanic
Sun 08:01:43 PM	25.5798	-165.2555	↘ 121°	580.0	667.0	41000.0	Level	FlightAware Transoceanic
Sun 08:03:06 PM	25.4657	-165.043	↘ 121°	580.0	667.0	41000.0	Level	FlightAware Transoceanic
Sun 08:05:05 PM	25.3015	-164.7391	↘ 121°	580.0	667.0	41000.0	Level	FlightAware Transoceanic
Sun 08:07:01 PM	25.2	-164.5333	↘ 121°	582.0	670.0	41000.0	Level	Oakland Oceanic
Sun 08:09:09 PM	25.0143	-164.1952	↘ 121°	582.0	670.0	41000.0	Level	FlightAware Transoceanic
Sun 08:11:34 PM	24.8047	-163.8168	↘ 121°	582.0	670.0	41000.0	Level	FlightAware Transoceanic
Sun 08:12:38 PM	24.7118	-163.6502	↘ 122°	582.0	670.0	41000.0	Level	FlightAware Transoceanic
Sun 08:14:39 PM	24.5358	-163.3359	↘ 122°	582.0	670.0	41000.0	Level	FlightAware Transoceanic
Sun 08:20:34 PM	24.0333	-162.4667	↘ 126°	580.0	667.0	41000.0	Level	Honolulu Center
Sun 08:21:34 PM	23.95	-162.3167	↘ 121°	580.0	667.0	40400.0	-1,300 Descending	Honolulu Center
Sun 08:22:34 PM	23.8667	-162.1833	↘ 124°	580.0	667.0	38400.0	-2,350 Descending	Honolulu Center
Sun 08:23:34 PM	23.7667	-162.0333	↘ 126°	580.0	667.0	35700.0	-2,150 Descending	Honolulu Center
Sun 08:24:34 PM	23.6833	-161.8833	↘ 121°	580.0	667.0	34100.0	-1,488 Descending	Honolulu Center
Sun 08:25:35 PM	23.5833	-161.7333	↘ 126°	580.0	667.0	32700.000000000004	-1,800 Descending	Honolulu Center
Sun 08:26:34 PM	23.5	-161.6	↘ 124°	570.0	656.0	30500.0	-2,650 Descending	Honolulu Center
Sun 08:27:35 PM	23.4167	-161.4667	↘ 124°	550.0	633.0	27400.0	-2,268 Descending	Honolulu Center
Sun 08:28:37 PM	23.3433	-161.3458	↘ 125°	502.0	578.0	25850.0	-1,445 Descending	FlightAware ADS-B (OGG / PHOG)
Sun 08:29:25 PM	23.2811	-161.2475	↘ 125°	495.0	570.0	24750.0	-1,297 Descending	FlightAware ADS-B (OGG / PHOG)
Sun 08:30:35 PM	23.1833	-161.1	↘ 125°	520.0	598.0	23300.0	-1,018 Descending	Honolulu Center
Sun 08:31:42 PM	23.1144	-160.9845	↘ 124°	465.0	535.0	22425.0	-713 Descending	FlightAware ADS-B (OGG / PHOG)
Sun 08:32:16 PM	23.0712	-160.9164	↘ 125°	456.0	525.0	22100.0	-507 Descending	FlightAware ADS-B (OGG / PHOG)
Sun 08:32:56 PM	23.0279	-160.8483	↘ 125°	445.0	512.0	21800.0	-655 Descending	FlightAware ADS-B (OGG / PHOG)
Sun 08:33:27 PM	22.9862	-160.783	↘ 125°	442.0	509.0	21325.0	-762 Descending	FlightAware ADS-B (OGG / PHOG)
Sun 08:33:57 PM	22.9535	-160.7317	↘ 125°	435.0	501.0	21025.0	-895 Descending	FlightAware ADS-B (OGG / PHOG)
Sun 08:35:36 PM	22.8333	-160.55	↘ 125°	450.0	518.0	19400.0	-883 Descending	Honolulu Center
Sun 08:36:35 PM	22.75	-160.4333	↘ 128°	450.0	518.0	18700.0	-700 Descending	Honolulu Center
Sun 08:37:36 PM	22.6833	-160.3167	↘ 122°	450.0	518.0	18000.0	-595 Descending	Honolulu Center
Sun 08:38:36 PM	22.6167	-160.2167	↘ 126°	440.0	506.0	17500.0	-550 Descending	Honolulu Center
Sun 08:39:36 PM	22.55	-160.1167	↘ 126°	430.0	495.0	16900.0	-671 Descending	Honolulu Center
Sun 08:39:52 PM	22.5391	-160.0879	↘ 125°	424.0	488.0	16650.0	-620 Descending	FlightAware ADS-B (LIH / PHLI)
Sun 08:40:22 PM	22.5052	-160.0352	↘ 125°	423.0	487.0	16425.0	-516 Descending	FlightAware ADS-B (LIH / PHLI)
Sun 08:40:53 PM	22.4714	-159.9831	↘ 125°	421.0	484.0	16125.0	-579 Descending	FlightAware ADS-B (LIH / PHLI)
Sun 08:41:32 PM	22.4269	-159.9145	↘ 125°	425.0	489.0	15750.0	-587 Descending	FlightAware ADS-B (LIH / PHLI)
Sun 08:42:02 PM	22.3935	-159.8629	↘ 125°	425.0	489.0	15450.0	-525 Descending	FlightAware ADS-B (LIH / PHLI)
Sun 08:42:32 PM	22.3593	-159.8103	↘ 125°	422.0	486.0	15225.0	-492 Descending	FlightAware ADS-B (LIH / PHLI)
Sun 08:43:03 PM	22.3255	-159.7584	↘ 125°	420.0	483.0	14950.0	-516 Descending	FlightAware ADS-B (LIH / PHLI)
Sun 08:43:33 PM	22.2915	-159.7062	↘ 125°	418.0	481.0	14700.0	-477 Descending	FlightAware ADS-B (LIH / PHLI)
Sun 08:44:09 PM	22.251	-159.6439	↘ 125°	416.0	479.0	14425.0	-409 Descending	FlightAware ADS-B (LIH / PHLI)
Sun 08:44:39 PM	22.2182	-159.5938	↘ 125°	411.0	473.0	14250.0	-333 Descending	FlightAware ADS-B (LIH / PHLI)
Sun 08:45:12 PM	22.1827	-159.5398	↘ 125°	405.0	466.0	14075.0	-357 Descending	FlightAware ADS-B (LIH / PHLI)
Sun 08:45:42 PM	22.1497	-159.4894	↘ 125°	401.0	461.0	13875.0	-450 Descending	FlightAware ADS-B (LIH / PHLI)
Sun 08:46:12 PM	22.1185	-159.4419	↘ 125°	401.0	461.0	13625.0	-400 Descending	FlightAware ADS-B (LIH / PHLI)
Sun 08:46:42 PM	22.0858	-159.3917	↘ 125°	401.0	461.0	13475.0	-500 Descending	FlightAware ADS-B (LIH / PHLI)
Sun 08:47:12 PM	22.0535	-159.3423	↘ 125°	406.0	467.0	13125.0	-541 Descending	FlightAware ADS-B (LIH / PHLI)
Sun 08:47:43 PM	22.0207	-159.2921	↘ 125°	398.0	458.0	12925.0	-566 Descending	FlightAware ADS-B (LIH / PHLI)
Sun 08:48:13 PM	21.9882	-159.2429	↘ 125°	397.0	457.0	12550.0	-541 Descending	FlightAware ADS-B (LIH / PHLI)
Sun 08:48:44 PM	21.956	-159.1939	↘ 125°	396.0	456.0	12375.0	-516 Descending	FlightAware ADS-B (LIH / PHLI)
Sun 08:49:14 PM	21.9243	-159.1458	↘ 125°	395.0	455.0	12025.0	-700 Descending	FlightAware ADS-B (LIH / PHLI)
Sun 08:49:44 PM	21.8927	-159.0976	↘ 125°	395.0	455.0	11675.0	-614 Descending	FlightAware ADS-B (LIH / PHLI)
Sun 08:50:20 PM	21.8581	-159.0451	↘ 125°	385.0	443.0	11350.0	-591 Descending	FlightAware ADS-B (OGG / PHOG)
Sun 08:50:50 PM	21.8244	-158.9942	↘ 125°	359.0	413.0	11025.0	-550 Descending	FlightAware ADS-B (OGG / PHOG)
Sun 08:51:20 PM	21.7963	-158.9517	↘ 125°	337.0	388.0	10800.0	-443 Descending	FlightAware ADS-B (OGG / PHOG)
Sun 08:51:51 PM	21.7696	-158.9114	↘ 125°	317.0	365.0	10575.0	-443 Descending	FlightAware ADS-B (OGG / PHOG)
Sun 08:52:21 PM	21.7451	-158.8742	↘ 125°	300.0	345.0	10350.0	-589 Descending	FlightAware ADS-B (OGG / PHOG)
Sun 08:52:47 PM	21.7242	-158.8428	↘ 125°	292.0	336.0	10025.0	-714 Descending	FlightAware ADS-B (OGG / PHOG)
Sun 08:53:03 PM	21.7119	-158.8241	↘ 125°	291.0	335.0	9850.0	-638 Descending	FlightAware ADS-B (LIH / PHLI)
Sun 08:53:34 PM	21.687	-158.7865	↘ 125°	288.0	331.0	9525.0	-571 Descending	FlightAware ADS-B (PHNL)
Sun 08:54:06 PM	21.6627	-158.75	↘ 126°	286.0	329.0	9250.0	-490 Descending	FlightAware ADS-B (PHNL)
Sun 08:54:23 PM	21.6498	-158.7305	↘ 125°	283.0	326.0	9125.0	-563 Descending	FlightAware ADS-B (OGG / PHOG)
Sun 08:54:54 PM	21.6262	-158.6948	↘ 126°	282.0	325.0	8800.0	-563 Descending	FlightAware ADS-B (PHNL)
Sun 08:55:11 PM	21.613	-158.675	↘ 125°	281.0	323.0	8675.0	-429 Descending	FlightAware ADS-B (LIH / PHLI)
Sun 08:55:43 PM	21.5887	-158.6385	↘ 125°	280.0	322.0	8450.0	-405 Descending	FlightAware ADS-B (PHNL)
Sun 08:56:14 PM	21.5653	-158.6031	↘ 125°	278.0	320.0	8250.0	-369 Descending	FlightAware ADS-B (PHNL)
Sun 08:56:44 PM	21.5436	-158.5703	↘ 124°	277.0	319.0	8074.999999999999	-525 Descending	FlightAware ADS-B (PHIK)
Sun 08:57:14 PM	21.5225	-158.536	↘ 123°	278.0	320.0	7725.0	-650 Descending	FlightAware ADS-B (OGG / PHOG)
Sun 08:57:44 PM	21.501	-158.5011	↘ 123°	277.0	319.0	7425.0	-543 Descending	FlightAware ADS-B (LIH / PHLI)
Sun 08:58:01 PM	21.4893	-158.4819	↘ 123°	275.0	316.0	7300.0	-926 Descending	FlightAware ADS-B (OGG / PHOG)
Sun 08:58:31 PM	21.4679	-158.4473	↘ 123°	275.0	316.0	6700.0	-1,175 Descending	FlightAware ADS-B (OGG / PHOG)
Sun 08:59:01 PM	21.4474	-158.414	↘ 124°	276.0	318.0	6125.0	-1,075 Descending	FlightAware ADS-B (OGG / PHOG)
Sun 08:59:31 PM	21.4255	-158.3791	↘ 124°	274.0	315.0	5625.0	-1,075 Descending	FlightAware ADS-B (OGG / PHOG)
Sun 09:00:01 PM	21.405	-158.3467	↘ 124°	273.0	314.0	5050.0	-975 Descending	FlightAware ADS-B (OGG / PHOG)
Sun 09:00:31 PM	21.3832	-158.3128	↘ 125°	266.0	306.0	4650.0	-825 Descending	FlightAware ADS-B (LIH / PHLI)
Sun 09:01:01 PM	21.3619	-158.2795	↘ 123°	258.0	297.0	4225.0	-900 Descending	FlightAware ADS-B (PHNL)
Sun 09:01:31 PM	21.3424	-158.2471	↘ 123°	254.0	292.0	3750.0	-960 Descending	FlightAware ADS-B (PHNL)
Sun 09:01:51 PM	21.3297	-158.2262	↘ 122°	250.0	288.0	3425.0	-987 Descending	FlightAware ADS-B (PHNL)
Sun 09:02:09 PM	21.3249	-158.207	→ 95°	244.0	281.0	3125.0	-814 Descending	FlightAware ADS-B (PHIK)
Sun 09:02:26 PM	21.3247	-158.1861	→ 90°	239.0	275.0	2950.0	-223 Descending	FlightAware ADS-B (PHIK)
Sun 09:02:56 PM	21.325	-158.1531	→ 90°	216.0	249.0	2950.0	33 Climbing	FlightAware ADS-B (PHNL)
Sun 09:03:12 PM	21.325	-158.1356	→ 90°	198.0	228.0	2975.0	-44 Descending	FlightAware ADS-B (PHNL)
Sun 09:03:30 PM	21.325	-158.1186	→ 90°	183.0	211.0	2925.0	-132 Descending	FlightAware ADS-B (PHNL)
Sun 09:03:46 PM	21.325	-158.1054	→ 90°	179.0	206.0	2900.0	-469 Descending	FlightAware ADS-B (PHNL)
Sun 09:04:02 PM	21.325	-158.0912	→ 90°	181.0	208.0	2675.0	-984 Descending	FlightAware ADS-B (JRF / PHJR)
Sun 09:04:18 PM	21.3251	-158.0766	→ 90°	184.0	212.0	2375.0	-1,078 Descending	FlightAware ADS-B (PHHI)
Sun 09:04:34 PM	21.3251	-158.0616	→ 90°	171.0	197.0	2100.0	-1,031 Descending	FlightAware ADS-B (PHIK)
Sun 09:04:50 PM	21.3251	-158.0477	→ 90°	160.0	184.0	1825.0	-844 Descending	FlightAware ADS-B (PHNL)
Sun 09:05:06 PM	21.3251	-158.0371	→ 90°	151.0	174.0	1650.0	-750 Descending	FlightAware ADS-B (PHIK)
Sun 09:05:22 PM	21.3252	-158.0247	→ 90°	149.0	171.0	1425.0	-750 Descending	FlightAware ADS-B (PHNL)
Sun 09:05:38 PM	21.3252	-158.0128	→ 90°	150.0	173.0	1250.0	-773 Descending	FlightAware ADS-B (OGG / PHOG)
Sun 09:05:55 PM	21.3252	-157.9998	→ 90°	149.0	171.0	1000.0	-818 Descending	FlightAware ADS-B (PHNL)
Sun 09:06:11 PM	21.3252	-157.9889	→ 90°	149.0	171.0	800.0	-750 Descending	FlightAware ADS-B (PHNL)
Sun 09:06:27 PM	21.3252	-157.9777	→ 90°	149.0	171.0	600.0	-750 Descending	FlightAware ADS-B (PHNL)
