# Supplementary material for: TrackMatcher – a tool for finding intercepts in tracks of geographical positions
Source: Copernicus journal article supplement (doi:10.5194/gmd-15-7557-2022), 2022-10-18
Supplement: Supplementary file 1 [file gmd-15-7557-2022-supplement.zip › ESM/example/data/flights/JST219_27-JAN-2019_YMML-NZQN.dat]

Time (CET)	Latitude	Longitude	Course	kts	mph	feet	Rate	Reporting Facility
Sun 08:23:42 PM	-37.6594	144.8044	← 276°	160.0	184.0	1600.0	Level	FlightAware ADS-B (YTYA)
Sun 08:24:01 PM	-37.6577	144.7857	← 277°	177.0	204.0	2000.0	1,241 Climbing	Aus ATC (ADS-B)
Sun 08:24:11 PM	-37.6569	144.7749	← 275°	192.0	221.0	2200.0	1,038 Climbing	Aus ATC (ADS-B)
Sun 08:24:14 PM	-37.6567	144.7722	← 275°	196.0	226.0	2225.0	1,200 Climbing	FlightAware ADS-B (MBW / YMMB)
Sun 08:24:16 PM	-37.6565	144.7694	← 276°	198.0	228.0	2300.0	1,500 Climbing	Aus ATC (ADS-B)
Sun 08:24:30 PM	-37.6557	144.7573	← 275°	210.0	242.0	2625.0	2,716 Climbing	FlightAware ADS-B
Sun 08:24:53 PM	-37.6543	144.7264	← 273°	199.0	229.0	3975.0	3,242 Climbing	FlightAware ADS-B (YAFD)
Sun 08:25:01 PM	-37.654	144.7154	← 272°	198.0	228.0	4300.0	2,156 Climbing	Aus ATC (ADS-B)
Sun 08:25:09 PM	-37.6547	144.7082	← 260°	205.0	236.0	4550.0	1,800 Climbing	FlightAware ADS-B (YTYA)
Sun 08:25:11 PM	-37.6555	144.7037	← 256°	209.0	241.0	4600.0	1,031 Climbing	Aus ATC (ADS-B)
Sun 08:25:25 PM	-37.6626	144.6878	↙ 231°	237.0	273.0	4825.0	1,400 Climbing	FlightAware ADS-B (MBW / YMMB)
Sun 08:25:41 PM	-37.6786	144.6734	↙ 212°	260.0	299.0	5300.0	2,019 Climbing	FlightAware ADS-B (YAFD)
Sun 08:25:51 PM	-37.6881	144.6664	↙ 209°	268.0	308.0	5700.0	2,700 Climbing	Aus ATC (ADS-B)
Sun 08:26:01 PM	-37.6992	144.6587	↙ 207°	275.0	316.0	6200.0	2,800 Climbing	Aus ATC (ADS-B)
Sun 08:26:06 PM	-37.7054	144.6559	↙ 202°	278.0	320.0	6400.0	3,000 Climbing	Aus ATC (ADS-B)
Sun 08:26:11 PM	-37.7115	144.6542	↓ 193°	280.0	322.0	6700.0	3,545 Climbing	Aus ATC (ADS-B)
Sun 08:26:17 PM	-37.7203	144.6539	↓ 179°	284.0	327.0	7050.0	3,000 Climbing	FlightAware ADS-B (YAFD)
Sun 08:26:21 PM	-37.7247	144.6543	↓ 177°	286.0	329.0	7200.0	2,912 Climbing	Aus ATC (ADS-B)
Sun 08:26:34 PM	-37.7402	144.6607	↘ 155°	291.0	335.0	7875.0	2,700 Climbing	FlightAware ADS-B (YHBH)
Sun 08:26:51 PM	-37.7578	144.6812	↘ 122°	301.0	346.0	8550.0	2,500 Climbing	FlightAware ADS-B (YMPC)
Sun 08:27:01 PM	-37.7636	144.6956	↘ 117°	302.0	348.0	9000.0	2,850 Climbing	Aus ATC (ADS-B)
Sun 08:27:11 PM	-37.7701	144.7131	↘ 116°	305.0	351.0	9500.0	2,800 Climbing	Aus ATC (ADS-B)
Sun 08:27:16 PM	-37.773	144.7212	↘ 114°	306.0	352.0	9700.0	2,250 Climbing	Aus ATC (ADS-B)
Sun 08:27:17 PM	-37.7726	144.7201	↘ 115°	307.0	353.0	9725.0	2,400 Climbing	FlightAware ADS-B (YMPC)
Sun 08:27:21 PM	-37.776	144.7293	↘ 115°	309.0	356.0	9900.0	2,500 Climbing	Aus ATC (ADS-B)
Sun 08:27:26 PM	-37.7784	144.7359	↘ 114°	310.0	357.0	10100.0	2,000 Climbing	Aus ATC (ADS-B)
Sun 08:27:36 PM	-37.7854	144.7542	↘ 116°	321.0	369.0	10400.0	1,615 Climbing	Aus ATC (ADS-B)
Sun 08:27:39 PM	-37.7876	144.7605	↘ 114°	325.0	374.0	10450.0	1,200 Climbing	FlightAware ADS-B (MEL / YMML)
Sun 08:27:41 PM	-37.7885	144.7629	↘ 111°	327.0	376.0	10500.0	960 Climbing	Aus ATC (ADS-B)
Sun 08:28:04 PM	-37.7974	144.8048	→ 102°	353.0	406.0	10850.0	1,350 Climbing	FlightAware ADS-B (YLIL)
Sun 08:28:21 PM	-37.803	144.8401	→ 101°	364.0	419.0	11400.0	1,889 Climbing	Aus ATC (ADS-B)
Sun 08:28:31 PM	-37.8066	144.863	→ 101°	369.0	425.0	11700.0	1,846 Climbing	Aus ATC (ADS-B)
Sun 08:28:34 PM	-37.8072	144.8664	→ 101°	370.0	426.0	11800.0	2,400 Climbing	FlightAware ADS-B (YGEH)
Sun 08:28:36 PM	-37.8083	144.8736	→ 100°	371.0	427.0	11900.0	2,500 Climbing	Aus ATC (ADS-B)
Sun 08:28:46 PM	-37.8113	144.8926	→ 102°	372.0	428.0	12300.0	2,800 Climbing	Aus ATC (ADS-B)
Sun 08:28:51 PM	-37.8134	144.9054	→ 102°	372.0	428.0	12600.0	3,000 Climbing	Aus ATC (ADS-B)
Sun 08:28:56 PM	-37.8151	144.9159	→ 101°	371.0	427.0	12800.0	3,200 Climbing	Aus ATC (ADS-B)
Sun 08:29:06 PM	-37.8185	144.9375	→ 101°	369.0	425.0	13400.0	3,200 Climbing	Aus ATC (ADS-B)
Sun 08:29:11 PM	-37.8202	144.9476	→ 102°	369.0	425.0	13600.0	2,400 Climbing	Aus ATC (ADS-B)
Sun 08:29:16 PM	-37.8218	144.9579	→ 101°	369.0	425.0	13800.0	2,400 Climbing	Aus ATC (ADS-B)
Sun 08:29:21 PM	-37.8235	144.9687	→ 101°	371.0	427.0	14000.0	2,000 Climbing	Aus ATC (ADS-B)
Sun 08:29:31 PM	-37.8269	144.9904	→ 102°	375.0	432.0	14300.0	1,846 Climbing	Aus ATC (ADS-B)
Sun 08:29:34 PM	-37.828	144.9971	→ 101°	376.0	433.0	14400.0	2,000 Climbing	FlightAware ADS-B (YHBH)
Sun 08:29:46 PM	-37.8321	145.0228	→ 101°	381.0	438.0	14800.0	2,182 Climbing	Aus ATC (ADS-B)
Sun 08:29:56 PM	-37.8356	145.0445	→ 102°	381.0	438.0	15200.0	2,400 Climbing	Aus ATC (ADS-B)
Sun 08:30:01 PM	-37.8373	145.0549	→ 102°	381.0	438.0	15400.0	2,813 Climbing	Aus ATC (ADS-B)
Sun 08:30:04 PM	-37.8386	145.063	→ 101°	381.0	438.0	15575.0	2,364 Climbing	FlightAware ADS-B (YMPC)
Sun 08:30:34 PM	-37.8486	145.1256	→ 101°	385.0	443.0	16700.0	2,175 Climbing	FlightAware ADS-B (WMB / YWBL)
Sun 08:31:04 PM	-37.8596	145.1945	→ 102°	390.0	449.0	17750.0	2,043 Climbing	FlightAware ADS-B (MBW / YMMB)
Sun 08:31:21 PM	-37.8692	145.2305	→ 109°	394.0	453.0	18300.0	1,889 Climbing	Aus ATC (ADS-B)
Sun 08:31:31 PM	-37.8782	145.2506	↘ 119°	396.0	456.0	18600.0	2,000 Climbing	Aus ATC (ADS-B)
Sun 08:31:36 PM	-37.8829	145.2608	↘ 121°	396.0	456.0	18800.0	1,600 Climbing	Aus ATC (ADS-B)
Sun 08:31:46 PM	-37.8922	145.2806	↘ 121°	400.0	460.0	19000.0	1,600 Climbing	Aus ATC (ADS-B)
Sun 08:31:51 PM	-37.8969	145.2908	↘ 121°	403.0	464.0	19200.0	1,600 Climbing	Aus ATC (ADS-B)
Sun 08:32:01 PM	-37.9064	145.3115	↘ 120°	407.0	468.0	19400.0	1,375 Climbing	Aus ATC (ADS-B)
Sun 08:32:03 PM	-37.9094	145.3179	↘ 120°	408.0	470.0	19475.0	2,000 Climbing	FlightAware ADS-B (YTDN)
Sun 08:32:10 PM	-37.9157	145.3319	↘ 120°	410.0	472.0	19700.0	2,125 Climbing	Aus ATC (ADS-B)
Sun 08:32:15 PM	-37.9204	145.342	↘ 121°	410.0	472.0	19900.0	1,800 Climbing	Aus ATC (ADS-B)
Sun 08:32:20 PM	-37.9244	145.3505	↘ 120°	410.0	472.0	20000.0	1,833 Climbing	Aus ATC (ADS-B)
Sun 08:32:33 PM	-37.9378	145.3799	↘ 120°	413.0	475.0	20450.0	1,800 Climbing	FlightAware ADS-B (YAFD)
Sun 08:33:00 PM	-37.9637	145.4362	↘ 120°	419.0	482.0	21200.0	1,750 Climbing	Aus ATC (ADS-B)
Sun 08:33:03 PM	-37.9673	145.4441	↘ 120°	419.0	482.0	21325.0	1,800 Climbing	FlightAware ADS-B (YBSS)
Sun 08:33:10 PM	-37.9734	145.4574	↘ 120°	420.0	483.0	21500.0	1,650 Climbing	Aus ATC (ADS-B)
Sun 08:33:33 PM	-37.9947	145.5036	↘ 120°	422.0	486.0	22150.0	1,714 Climbing	FlightAware ADS-B (YTDN)
Sun 08:33:45 PM	-38.0076	145.5319	↘ 120°	424.0	488.0	22500.0	1,773 Climbing	Aus ATC (ADS-B)
Sun 08:33:55 PM	-38.0175	145.5534	↘ 120°	425.0	489.0	22800.0	1,600 Climbing	Aus ATC (ADS-B)
Sun 08:34:00 PM	-38.0225	145.5644	↘ 119°	425.0	489.0	22900.0	1,688 Climbing	Aus ATC (ADS-B)
Sun 08:34:03 PM	-38.0247	145.5691	↘ 120°	426.0	490.0	23025.0	1,800 Climbing	FlightAware ADS-B (MEL / YMML)
Sun 08:34:10 PM	-38.0323	145.5858	↘ 120°	426.0	490.0	23200.0	1,568 Climbing	Aus ATC (ADS-B)
Sun 08:34:25 PM	-38.0471	145.6182	↘ 120°	428.0	493.0	23600.0	1,500 Climbing	Aus ATC (ADS-B)
Sun 08:34:33 PM	-38.0538	145.6329	↘ 120°	430.0	495.0	23775.0	1,200 Climbing	FlightAware ADS-B (MBW / YMMB)
Sun 08:34:35 PM	-38.057	145.64	↘ 121°	430.0	495.0	23800.0	1,625 Climbing	Aus ATC (ADS-B)
Sun 08:34:45 PM	-38.0669	145.6616	↘ 120°	432.0	497.0	24100.0	1,600 Climbing	Aus ATC (ADS-B)
Sun 08:34:50 PM	-38.0719	145.6726	↘ 121°	433.0	498.0	24200.0	1,200 Climbing	Aus ATC (ADS-B)
Sun 08:35:00 PM	-38.082	145.6948	↘ 120°	435.0	501.0	24400.0	1,385 Climbing	Aus ATC (ADS-B)
Sun 08:35:03 PM	-38.0846	145.7004	↘ 120°	436.0	502.0	24500.0	1,200 Climbing	FlightAware ADS-B (YAFD)
Sun 08:35:05 PM	-38.0871	145.7059	↘ 118°	436.0	502.0	24500.0	857 Climbing	Aus ATC (ADS-B)
Sun 08:35:10 PM	-38.0912	145.715	↘ 120°	438.0	504.0	24600.0	1,200 Climbing	Aus ATC (ADS-B)
Sun 08:35:20 PM	-38.1023	145.7393	↘ 120°	441.0	507.0	24800.0	1,370 Climbing	Aus ATC (ADS-B)
Sun 08:35:33 PM	-38.1141	145.7652	↘ 120°	442.0	509.0	25125.0	1,500 Climbing	FlightAware ADS-B (YAFD)
Sun 08:36:00 PM	-38.1431	145.8292	↘ 120°	443.0	510.0	25800.0	1,550 Climbing	Aus ATC (ADS-B)
Sun 08:36:03 PM	-38.1454	145.8341	↘ 120°	444.0	511.0	25900.0	1,200 Climbing	FlightAware ADS-B (YAFD)
Sun 08:36:10 PM	-38.1534	145.8517	↘ 120°	445.0	512.0	26000.0	1,000 Climbing	Aus ATC (ADS-B)
Sun 08:36:15 PM	-38.1582	145.8624	↘ 121°	447.0	514.0	26100.0	1,200 Climbing	Aus ATC (ADS-B)
Sun 08:36:25 PM	-38.1687	145.8855	↘ 120°	451.0	519.0	26300.0	800 Climbing	Aus ATC (ADS-B)
Sun 08:36:30 PM	-38.173	145.895	↘ 118°	452.0	520.0	26300.0	563 Climbing	Aus ATC (ADS-B)
Sun 08:36:33 PM	-38.1769	145.9038	↘ 120°	453.0	521.0	26375.0	1,200 Climbing	FlightAware ADS-B (MEL / YMML)
Sun 08:36:35 PM	-38.179	145.9085	↘ 121°	453.0	521.0	26400.0	1,125 Climbing	Aus ATC (ADS-B)
Sun 08:36:45 PM	-38.1895	145.9319	↘ 120°	455.0	524.0	26600.0	1,200 Climbing	Aus ATC (ADS-B)
Sun 08:36:50 PM	-38.1947	145.9435	↘ 120°	457.0	526.0	26700.0	1,200 Climbing	Aus ATC (ADS-B)
Sun 08:36:55 PM	-38.2	145.9554	↘ 119°	458.0	527.0	26800.0	1,200 Climbing	Aus ATC (ADS-B)
Sun 08:37:00 PM	-38.2052	145.9669	↘ 119°	459.0	528.0	26900.0	750 Climbing	Aus ATC (ADS-B)
Sun 08:37:03 PM	-38.2055	145.9675	↘ 120°	461.0	531.0	26900.0	600 Climbing	FlightAware ADS-B (MEL / YMML)
Sun 08:37:10 PM	-38.2157	145.9901	↘ 119°	462.0	532.0	27000.0	818 Climbing	Aus ATC (ADS-B)
Sun 08:37:25 PM	-38.2308	146.0233	↘ 120°	467.0	537.0	27200.0	913 Climbing	Aus ATC (ADS-B)
Sun 08:37:33 PM	-38.2414	146.0466	↘ 120°	470.0	541.0	27350.0	1,200 Climbing	FlightAware ADS-B (YAFD)
Sun 08:37:35 PM	-38.2427	146.0495	↘ 123°	470.0	541.0	27400.0	429 Climbing	Aus ATC (ADS-B)
Sun 08:37:40 PM	-38.2481	146.0615	↘ 121°	472.0	543.0	27400.0	800 Climbing	Aus ATC (ADS-B)
Sun 08:37:50 PM	-38.2578	146.083	↘ 120°	474.0	545.0	27600.0	1,200 Climbing	Aus ATC (ADS-B)
Sun 08:37:55 PM	-38.2643	146.0974	↘ 120°	476.0	548.0	27700.0	600 Climbing	Aus ATC (ADS-B)
Sun 08:38:00 PM	-38.2701	146.1101	↘ 119°	477.0	549.0	27700.0	375 Climbing	Aus ATC (ADS-B)
Sun 08:38:03 PM	-38.2718	146.114	↘ 120°	478.0	550.0	27750.0	1,200 Climbing	FlightAware ADS-B (YMPC)
Sun 08:38:10 PM	-38.281	146.1344	↘ 120°	480.0	552.0	27900.0	900 Climbing	Aus ATC (ADS-B)
Sun 08:38:33 PM	-38.3075	146.1933	↘ 120°	486.0	559.0	28200.0	800 Climbing	FlightAware ADS-B (YAFD)
Sun 08:38:55 PM	-38.3311	146.246	↘ 120°	490.0	564.0	28500.0	889 Climbing	Aus ATC (ADS-B)
Sun 08:39:00 PM	-38.3364	146.2581	↘ 119°	492.0	566.0	28600.0	750 Climbing	Aus ATC (ADS-B)
Sun 08:39:03 PM	-38.3396	146.2653	↘ 119°	493.0	567.0	28600.0	Level	FlightAware ADS-B (YLIL)
Sun 08:39:05 PM	-38.342	146.2705	↘ 119°	494.0	568.0	28600.0	1,000 Climbing	Aus ATC (ADS-B)
Sun 08:39:15 PM	-38.3531	146.2958	↘ 120°	495.0	570.0	28800.0	1,200 Climbing	Aus ATC (ADS-B)
Sun 08:39:20 PM	-38.3588	146.3087	↘ 120°	497.0	572.0	28900.0	750 Climbing	Aus ATC (ADS-B)
Sun 08:39:33 PM	-38.3737	146.3423	↘ 119°	499.0	574.0	29025.0	600 Climbing	FlightAware ADS-B (MBW / YMMB)
Sun 08:40:00 PM	-38.4043	146.4111	↘ 120°	508.0	585.0	29300.0	700 Climbing	Aus ATC (ADS-B)
Sun 08:40:03 PM	-38.4083	146.4202	↘ 120°	508.0	585.0	29375.0	800 Climbing	FlightAware ADS-B (YLEG)
Sun 08:40:15 PM	-38.4219	146.4504	↘ 120°	511.0	588.0	29500.0	614 Climbing	Aus ATC (ADS-B)
Sun 08:40:25 PM	-38.4335	146.4762	↘ 119°	512.0	589.0	29600.0	800 Climbing	Aus ATC (ADS-B)
Sun 08:40:30 PM	-38.4384	146.4871	↘ 119°	514.0	592.0	29700.0	938 Climbing	Aus ATC (ADS-B)
Sun 08:40:33 PM	-38.4443	146.5004	↘ 120°	516.0	594.0	29725.0	600 Climbing	FlightAware ADS-B (YLEG)
Sun 08:40:40 PM	-38.4512	146.5158	↘ 119°	517.0	595.0	29800.0	375 Climbing	Aus ATC (ADS-B)
Sun 08:40:45 PM	-38.457	146.5288	↘ 120°	518.0	596.0	29800.0	600 Climbing	Aus ATC (ADS-B)
Sun 08:40:50 PM	-38.4632	146.5427	↘ 120°	520.0	598.0	29900.0	789 Climbing	Aus ATC (ADS-B)
Sun 08:41:04 PM	-38.4792	146.5786	↘ 120°	522.0	601.0	30050.0	750 Climbing	FlightAware ADS-B (YAFD)
Sun 08:41:34 PM	-38.5157	146.6605	↘ 119°	524.0	603.0	30450.0	765 Climbing	FlightAware ADS-B (MEL / YMML)
Sun 08:41:55 PM	-38.5404	146.7164	↘ 120°	527.0	606.0	30700.0	677 Climbing	Aus ATC (ADS-B)
Sun 08:42:05 PM	-38.5524	146.7438	↘ 119°	530.0	610.0	30800.0	400 Climbing	Aus ATC (ADS-B)
Sun 08:42:10 PM	-38.5586	146.7579	↘ 120°	531.0	611.0	30800.0	Level	Aus ATC (ADS-B)
Sun 08:42:15 PM	-38.5644	146.771	↘ 120°	533.0	613.0	30800.0	400 Climbing	Aus ATC (ADS-B)
Sun 08:42:25 PM	-38.5765	146.7985	↘ 119°	536.0	617.0	30900.0	429 Climbing	Aus ATC (ADS-B)
Sun 08:42:29 PM	-38.5824	146.8119	↘ 120°	536.0	617.0	30900.0	833 Climbing	Aus ATC (ADS-B)
Sun 08:42:34 PM	-38.5879	146.8246	↘ 119°	535.0	616.0	31025.0	1,800 Climbing	FlightAware ADS-B (YAFD)
Sun 08:42:39 PM	-38.5945	146.8397	↘ 120°	535.0	616.0	31200.0	1,357 Climbing	Aus ATC (ADS-B)
Sun 08:42:55 PM	-38.6114	146.8783	↘ 119°	532.0	612.0	31500.0	1,200 Climbing	Aus ATC (ADS-B)
Sun 08:43:04 PM	-38.6244	146.9085	↘ 119°	531.0	611.0	31700.0	1,250 Climbing	Aus ATC (ADS-B)
Sun 08:43:19 PM	-38.6424	146.9497	↘ 119°	532.0	612.0	32000.0	960 Climbing	Aus ATC (ADS-B)
Sun 08:43:29 PM	-38.6543	146.9769	↘ 120°	531.0	611.0	32100.0	800 Climbing	Aus ATC (ADS-B)
Sun 08:43:34 PM	-38.6599	146.9896	↘ 119°	532.0	612.0	32200.000000000004	1,200 Climbing	FlightAware ADS-B (YAFD)
Sun 08:43:44 PM	-38.6722	147.0178	↘ 120°	533.0	613.0	32400.0	1,200 Climbing	Aus ATC (ADS-B)
Sun 08:43:49 PM	-38.6783	147.0316	↘ 120°	533.0	613.0	32500.0	600 Climbing	Aus ATC (ADS-B)
Sun 08:43:54 PM	-38.6842	147.0453	↘ 120°	532.0	612.0	32500.0	800 Climbing	Aus ATC (ADS-B)
Sun 08:44:04 PM	-38.696	147.0722	↘ 119°	533.0	613.0	32700.000000000004	1,440 Climbing	Aus ATC (ADS-B)
Sun 08:44:19 PM	-38.7138	147.1128	↘ 119°	529.0	609.0	33100.0	1,300 Climbing	Aus ATC (ADS-B)
Sun 08:44:34 PM	-38.7319	147.1544	↘ 119°	530.0	610.0	33350.0	686 Climbing	FlightAware ADS-B (SXE / YMES)
Sun 08:44:54 PM	-38.7554	147.2083	↘ 119°	535.0	616.0	33500.0	600 Climbing	Aus ATC (ADS-B)
Sun 08:44:59 PM	-38.7617	147.2227	↘ 119°	535.0	616.0	33600.0	600 Climbing	Aus ATC (ADS-B)
Sun 08:45:04 PM	-38.7678	147.2366	↘ 119°	536.0	617.0	33600.0	400 Climbing	FlightAware ADS-B (YGTO)
Sun 08:45:14 PM	-38.7796	147.2637	↘ 120°	537.0	618.0	33700.0	800 Climbing	Aus ATC (ADS-B)
Sun 08:45:19 PM	-38.7857	147.2776	↘ 120°	537.0	618.0	33800.0	1,200 Climbing	Aus ATC (ADS-B)
Sun 08:45:29 PM	-38.7978	147.3055	↘ 120°	537.0	618.0	34000.0	1,100 Climbing	Aus ATC (ADS-B)
Sun 08:45:34 PM	-38.8052	147.3224	↘ 119°	536.0	617.0	34075.0	800 Climbing	FlightAware ADS-B (YMPC)
Sun 08:45:44 PM	-38.816	147.3473	↘ 119°	537.0	618.0	34200.0	975 Climbing	Aus ATC (ADS-B)
Sun 08:45:54 PM	-38.8279	147.3749	↘ 119°	537.0	618.0	34400.0	1,125 Climbing	Aus ATC (ADS-B)
Sun 08:46:04 PM	-38.8397	147.4024	↘ 119°	536.0	617.0	34575.0	1,200 Climbing	FlightAware ADS-B (LST / YMLT)
Sun 08:46:09 PM	-38.8459	147.4166	↘ 118°	535.0	616.0	34700.0	750 Climbing	Aus ATC (ADS-B)
Sun 08:46:34 PM	-38.8753	147.4854	↘ 119°	538.0	619.0	34950.0	655 Climbing	FlightAware ADS-B (YGTO)
Sun 08:47:04 PM	-38.9117	147.57	↘ 119°	539.0	620.0	35300.0	771 Climbing	FlightAware ADS-B (MBW / YMMB)
Sun 08:47:09 PM	-38.9174	147.5834	↘ 119°	540.0	621.0	35400.0	800 Climbing	Aus ATC (ADS-B)
Sun 08:47:19 PM	-38.9294	147.6114	↘ 119°	540.0	621.0	35500.0	960 Climbing	Aus ATC (ADS-B)
Sun 08:47:34 PM	-38.9485	147.6559	↘ 119°	538.0	619.0	35800.0	857 Climbing	FlightAware ADS-B (YTDN)
Sun 08:47:54 PM	-38.9711	147.7088	↘ 119°	539.0	620.0	36000.0	800 Climbing	Aus ATC (ADS-B)
Sun 08:48:04 PM	-38.9831	147.7368	↘ 119°	538.0	619.0	36200.0	1,200 Climbing	Aus ATC (ADS-B)
Sun 08:48:09 PM	-38.9893	147.7512	↘ 119°	537.0	618.0	36300.0	600 Climbing	Aus ATC (ADS-B)
Sun 08:48:14 PM	-38.9939	147.7621	↘ 118°	537.0	618.0	36300.0	600 Climbing	Aus ATC (ADS-B)
Sun 08:48:19 PM	-39.0009	147.7786	↘ 119°	537.0	618.0	36400.0	900 Climbing	Aus ATC (ADS-B)
Sun 08:48:34 PM	-39.0191	147.8211	↘ 119°	537.0	618.0	36600.0	600 Climbing	Aus ATC (ADS-B)
Sun 08:49:04 PM	-39.0551	147.9057	↘ 119°	538.0	619.0	36850.0	400 Climbing	FlightAware ADS-B (YGTO)
Sun 08:49:34 PM	-39.0907	147.9898	↘ 119°	543.0	625.0	37000.0	184 Climbing	FlightAware ADS-B (YDPO)
Sun 08:49:53 PM	-39.1144	148.0456	↘ 119°	544.0	626.0	37000.0	Level	Aus ATC (ADS-B)
Sun 08:49:58 PM	-39.1201	148.0592	↘ 119°	545.0	627.0	37000.0	Level	Aus ATC (ADS-B)
Sun 08:50:04 PM	-39.1259	148.0728	↘ 119°	546.0	628.0	37000.0	Level	FlightAware ADS-B (YMPC)
Sun 08:50:08 PM	-39.1322	148.0878	↘ 119°	546.0	628.0	37000.0	Level	Aus ATC (ADS-B)
Sun 08:50:23 PM	-39.1503	148.1306	↘ 119°	547.0	629.0	37000.0	Level	Aus ATC (ADS-B)
Sun 08:50:33 PM	-39.1624	148.1593	↘ 119°	546.0	628.0	37000.0	Level	Aus ATC (ADS-B)
Sun 08:50:35 PM	-39.1642	148.1635	↘ 118°	546.0	628.0	37000.0	Level	FlightAware ADS-B (YMPC)
Sun 08:50:43 PM	-39.1743	148.1875	↘ 119°	545.0	627.0	37000.0	Level	Aus ATC (ADS-B)
Sun 08:50:48 PM	-39.1803	148.2018	↘ 119°	544.0	626.0	37000.0	Level	Aus ATC (ADS-B)
Sun 08:50:58 PM	-39.1922	148.2299	↘ 119°	544.0	626.0	37000.0	Level	Aus ATC (ADS-B)
Sun 08:51:03 PM	-39.1983	148.2443	↘ 119°	544.0	626.0	37000.0	Level	Aus ATC (ADS-B)
Sun 08:51:05 PM	-39.199	148.2461	↘ 119°	544.0	626.0	37000.0	Level	FlightAware ADS-B (YSFY)
Sun 08:51:08 PM	-39.2042	148.2584	↘ 118°	544.0	626.0	37000.0	Level	Aus ATC (ADS-B)
Sun 08:51:18 PM	-39.2161	148.2866	↘ 118°	544.0	626.0	37000.0	Level	Aus ATC (ADS-B)
Sun 08:51:23 PM	-39.2222	148.3013	↘ 119°	544.0	626.0	37000.0	Level	Aus ATC (ADS-B)
Sun 08:51:33 PM	-39.2329	148.3267	↘ 118°	543.0	625.0	37000.0	Level	Aus ATC (ADS-B)
Sun 08:51:42 PM	-39.2448	148.3551	↘ 118°	542.0	624.0	37000.0	Level	FlightAware ADS-B (MBW / YMMB)
Sun 08:51:48 PM	-39.2519	148.3719	↘ 118°	542.0	624.0	37000.0	Level	Aus ATC (ADS-B)
Sun 08:51:58 PM	-39.2626	148.3977	↘ 118°	541.0	623.0	37000.0	Level	Aus ATC (ADS-B)
Sun 08:52:08 PM	-39.2756	148.4286	↘ 119°	541.0	623.0	37000.0	-100 Descending	Aus ATC (ADS-B)
Sun 08:52:13 PM	-39.2823	148.4447	↘ 118°	541.0	623.0	36975.0	Level	FlightAware ADS-B (YDPO)
Sun 08:52:23 PM	-39.2932	148.471	↘ 119°	539.0	620.0	37000.0	100 Climbing	Aus ATC (ADS-B)
Sun 08:52:28 PM	-39.2991	148.485	↘ 119°	539.0	620.0	37000.0	Level	Aus ATC (ADS-B)
Sun 08:52:33 PM	-39.3051	148.4994	↘ 118°	539.0	620.0	37000.0	Level	Aus ATC (ADS-B)
Sun 08:52:43 PM	-39.3169	148.5277	↘ 118°	539.0	620.0	37000.0	Level	Aus ATC (ADS-B)
Sun 08:52:48 PM	-39.3225	148.5414	↘ 118°	539.0	620.0	37000.0	Level	Aus ATC (ADS-B)
Sun 08:52:53 PM	-39.3274	148.5531	↘ 117°	537.0	618.0	37000.0	Level	Aus ATC (ADS-B)
Sun 08:52:58 PM	-39.3342	148.5695	↘ 118°	537.0	618.0	37000.0	Level	Aus ATC (ADS-B)
Sun 08:53:08 PM	-39.346	148.5981	↘ 118°	537.0	618.0	37000.0	-143 Descending	Aus ATC (ADS-B)
Sun 08:53:19 PM	-39.3582	148.6274	↘ 118°	537.0	618.0	36950.0	Level	FlightAware ADS-B (MEL / YMML)
Sun 08:53:23 PM	-39.3634	148.64	↘ 117°	537.0	618.0	37000.0	214 Climbing	Aus ATC (ADS-B)
Sun 08:53:33 PM	-39.3753	148.6686	↘ 118°	537.0	618.0	37000.0	-115 Descending	Aus ATC (ADS-B)
Sun 08:53:49 PM	-39.3926	148.7105	↘ 118°	537.0	618.0	36950.0	-65 Descending	FlightAware ADS-B (MEL / YMML)
Sun 08:54:19 PM	-39.4278	148.7954	↘ 118°	536.0	617.0	36950.0	68 Climbing	FlightAware ADS-B (MEL / YMML)
Sun 08:54:33 PM	-39.4452	148.8376	↘ 118°	537.0	618.0	37000.0	158 Climbing	Aus ATC (ADS-B)
Sun 08:54:38 PM	-39.4499	148.8489	↘ 119°	537.0	618.0	37000.0	Level	Aus ATC (ADS-B)
Sun 08:54:48 PM	-39.4627	148.88	↘ 118°	537.0	618.0	37000.0	-94 Descending	Aus ATC (ADS-B)
Sun 08:54:54 PM	-39.4676	148.892	↘ 118°	537.0	618.0	36975.0	Level	FlightAware ADS-B (YTDN)
Sun 08:54:58 PM	-39.4743	148.9081	↘ 118°	537.0	618.0	37000.0	167 Climbing	Aus ATC (ADS-B)
Sun 08:55:03 PM	-39.48	148.9219	↘ 118°	537.0	618.0	37000.0	Level	Aus ATC (ADS-B)
Sun 08:55:13 PM	-39.4916	148.9503	↘ 118°	536.0	617.0	37000.0	Level	Aus ATC (ADS-B)
Sun 08:55:23 PM	-39.5034	148.9791	↘ 118°	536.0	617.0	37000.0	Level	Aus ATC (ADS-B)
Sun 08:55:28 PM	-39.5091	148.993	↘ 118°	537.0	618.0	37000.0	-167 Descending	Aus ATC (ADS-B)
Sun 08:55:32 PM	-39.5133	149.0031	↘ 118°	537.0	618.0	36975.0	Level	FlightAware ADS-B (BWT / YWYY)
Sun 08:55:38 PM	-39.5206	149.0212	↘ 118°	537.0	618.0	37000.0	136 Climbing	Aus ATC (ADS-B)
Sun 08:55:43 PM	-39.5266	149.0356	↘ 118°	537.0	618.0	37000.0	Level	Aus ATC (ADS-B)
Sun 08:55:48 PM	-39.5322	149.0494	↘ 118°	536.0	617.0	37000.0	-79 Descending	Aus ATC (ADS-B)
Sun 08:56:02 PM	-39.5491	149.0906	↘ 118°	537.0	618.0	36975.0	Level	FlightAware ADS-B (BWT / YWYY)
Sun 08:56:32 PM	-39.5844	149.1773	↘ 118°	538.0	619.0	37000.0	42 Climbing	FlightAware ADS-B (BWT / YWYY)
Sun 08:56:38 PM	-39.5899	149.1908	↘ 117°	538.0	619.0	37000.0	Level	Aus ATC (ADS-B)
Sun 08:56:48 PM	-39.6016	149.2194	↘ 118°	538.0	619.0	37000.0	Level	Aus ATC (ADS-B)
Sun 08:56:53 PM	-39.6063	149.2311	↘ 117°	539.0	620.0	37000.0	Level	Aus ATC (ADS-B)
Sun 08:57:03 PM	-39.6191	149.2624	↘ 118°	539.0	620.0	37000.0	Level	Aus ATC (ADS-B)
Sun 08:57:08 PM	-39.6249	149.2766	↘ 117°	539.0	620.0	37000.0	Level	Aus ATC (ADS-B)
Sun 08:57:13 PM	-39.6306	149.2908	↘ 118°	539.0	620.0	37000.0	Level	Aus ATC (ADS-B)
Sun 08:57:23 PM	-39.6421	149.3191	↘ 118°	540.0	621.0	37000.0	Level	Aus ATC (ADS-B)
Sun 08:57:28 PM	-39.648	149.3337	↘ 118°	540.0	621.0	37000.0	Level	Aus ATC (ADS-B)
Sun 08:57:33 PM	-39.653	149.346	↘ 118°	540.0	621.0	37000.0	Level	FlightAware ADS-B (BWT / YWYY)
Sun 08:57:38 PM	-39.6597	149.3624	↘ 118°	540.0	621.0	37000.0	Level	Aus ATC (ADS-B)
Sun 08:57:48 PM	-39.6713	149.3912	↘ 117°	541.0	623.0	37000.0	Level	Aus ATC (ADS-B)
Sun 08:58:03 PM	-39.6884	149.4336	↘ 118°	541.0	623.0	37000.0	Level	Aus ATC (ADS-B)
Sun 08:58:13 PM	-39.7001	149.4624	↘ 118°	542.0	624.0	37000.0	Level	Aus ATC (ADS-B)
Sun 08:58:18 PM	-39.7059	149.4769	↘ 117°	542.0	624.0	37000.0	Level	Aus ATC (ADS-B)
Sun 08:58:28 PM	-39.7175	149.5057	↘ 118°	542.0	624.0	37000.0	Level	Aus ATC (ADS-B)
Sun 08:58:33 PM	-39.7232	149.5198	↘ 118°	542.0	624.0	37000.0	Level	Aus ATC (ADS-B)
Sun 08:58:35 PM	-39.7254	149.5252	↘ 118°	542.0	624.0	37000.0	47 Climbing	FlightAware ADS-B (YSFY)
Sun 08:59:05 PM	-39.7597	149.6104	↘ 118°	541.0	623.0	37025.0	Level	FlightAware ADS-B (YSFY)
Sun 08:59:13 PM	-39.7693	149.6344	↘ 117°	541.0	623.0	37000.0	-65 Descending	Aus ATC (ADS-B)
Sun 08:59:28 PM	-39.7866	149.6774	↘ 117°	541.0	623.0	37000.0	68 Climbing	Aus ATC (ADS-B)
Sun 08:59:35 PM	-39.7952	149.6988	↘ 118°	541.0	623.0	37025.0	Level	FlightAware ADS-B (YSFY)
Sun 08:59:38 PM	-39.7984	149.7066	↘ 118°	541.0	623.0	37000.0	-188 Descending	Aus ATC (ADS-B)
Sun 08:59:43 PM	-39.8042	149.7212	↘ 118°	541.0	623.0	37000.0	Level	Aus ATC (ADS-B)
Sun 08:59:53 PM	-39.8155	149.7496	↘ 117°	542.0	624.0	37000.0	Level	Aus ATC (ADS-B)
Sun 08:59:58 PM	-39.8214	149.7643	↘ 118°	542.0	624.0	37000.0	Level	Aus ATC (ADS-B)
Sun 09:00:03 PM	-39.8271	149.7785	↘ 117°	542.0	624.0	37000.0	Level	Aus ATC (ADS-B)
Sun 09:00:05 PM	-39.8297	149.785	↘ 117°	542.0	624.0	37000.0	Level	FlightAware ADS-B (YSFY)
Sun 09:00:07 PM	-39.8328	149.7928	↘ 117°	542.0	624.0	37000.0	Level	Aus ATC (ADS-B)
Sun 09:00:18 PM	-39.8445	149.8219	↘ 118°	543.0	625.0	37000.0	Level	Aus ATC (ADS-B)
Sun 09:00:22 PM	-39.8501	149.8362	↘ 117°	543.0	625.0	37000.0	Level	Aus ATC (ADS-B)
Sun 09:00:27 PM	-39.856	149.851	↘ 117°	543.0	625.0	37000.0	Level	Aus ATC (ADS-B)
Sun 09:00:35 PM	-39.8639	149.8707	↘ 117°	543.0	625.0	37000.0	Level	FlightAware ADS-B (YSFY)
Sun 09:00:37 PM	-39.8662	149.8766	↘ 118°	543.0	625.0	37000.0	Level	Aus ATC (ADS-B)
Sun 09:00:52 PM	-39.8845	149.9227	↘ 118°	543.0	625.0	37000.0	Level	Aus ATC (ADS-B)
Sun 09:01:05 PM	-39.8988	149.9584	↘ 117°	543.0	625.0	37000.0	Level	FlightAware ADS-B (YSFY)
Sun 09:01:35 PM	-39.9332	150.0451	↘ 117°	543.0	625.0	37000.0	Level	FlightAware ADS-B (YSFY)
Sun 09:01:42 PM	-39.942	150.0674	↘ 117°	543.0	625.0	37000.0	Level	Aus ATC (ADS-B)
Sun 09:01:47 PM	-39.9478	150.0821	↘ 117°	543.0	625.0	37000.0	Level	Aus ATC (ADS-B)
Sun 09:01:52 PM	-39.9536	150.0967	↘ 117°	544.0	626.0	37000.0	Level	Aus ATC (ADS-B)
Sun 09:02:02 PM	-39.9651	150.1258	↘ 117°	544.0	626.0	37000.0	Level	Aus ATC (ADS-B)
Sun 09:02:05 PM	-39.9672	150.1312	↘ 117°	544.0	626.0	37000.0	Level	FlightAware ADS-B (YSFY)
Sun 09:02:12 PM	-39.9766	150.155	↘ 117°	544.0	626.0	37000.0	Level	Aus ATC (ADS-B)
Sun 09:02:17 PM	-39.982	150.1688	↘ 117°	544.0	626.0	37000.0	Level	Aus ATC (ADS-B)
Sun 09:02:27 PM	-39.9936	150.198	↘ 118°	544.0	626.0	37000.0	Level	Aus ATC (ADS-B)
Sun 09:02:35 PM	-40.0027	150.2212	↘ 117°	544.0	626.0	37000.0	Level	FlightAware ADS-B (YSFY)
Sun 09:02:42 PM	-40.0108	150.242	↘ 117°	544.0	626.0	37000.0	Level	Aus ATC (ADS-B)
Sun 09:02:52 PM	-40.0223	150.271	↘ 117°	545.0	627.0	37000.0	Level	Aus ATC (ADS-B)
Sun 09:02:57 PM	-40.028	150.2856	↘ 117°	544.0	626.0	37000.0	Level	Aus ATC (ADS-B)
Sun 09:03:02 PM	-40.0336	150.3	↘ 118°	544.0	626.0	37000.0	Level	Aus ATC (ADS-B)
Sun 09:03:05 PM	-40.0367	150.3077	↘ 117°	544.0	626.0	37000.0	Level	FlightAware ADS-B (YSFY)
Sun 09:03:12 PM	-40.0452	150.3294	↘ 117°	544.0	626.0	37000.0	Level	Aus ATC (ADS-B)
Sun 09:03:17 PM	-40.0498	150.3413	↘ 116°	544.0	626.0	37000.0	Level	Aus ATC (ADS-B)
Sun 09:03:27 PM	-40.0623	150.3733	↘ 117°	543.0	625.0	37000.0	Level	Aus ATC (ADS-B)
Sun 09:03:35 PM	-40.0717	150.3972	↘ 117°	543.0	625.0	37000.0	Level	FlightAware ADS-B (YSFY)
Sun 09:03:37 PM	-40.0736	150.402	↘ 116°	543.0	625.0	37000.0	Level	Aus ATC (ADS-B)
Sun 09:03:42 PM	-40.0793	150.4165	↘ 117°	543.0	625.0	37000.0	Level	Aus ATC (ADS-B)
Sun 09:03:52 PM	-40.0906	150.4455	↘ 117°	543.0	625.0	37000.0	Level	Aus ATC (ADS-B)
Sun 09:04:06 PM	-40.1058	150.4844	↘ 117°	544.0	626.0	37000.0	-31 Descending	FlightAware ADS-B (YSFY)
Sun 09:04:40 PM	-40.1448	150.5847	↘ 117°	544.0	626.0	36975.0	Level	FlightAware ADS-B (YSFY)
Sun 09:04:42 PM	-40.1475	150.5916	↘ 119°	544.0	626.0	37000.0	125 Climbing	Aus ATC (ADS-B)
Sun 09:04:52 PM	-40.1589	150.621	↘ 117°	544.0	626.0	37000.0	Level	Aus ATC (ADS-B)
Sun 09:04:57 PM	-40.1642	150.635	↘ 116°	544.0	626.0	37000.0	Level	Aus ATC (ADS-B)
Sun 09:05:07 PM	-40.1753	150.665	↘ 116°	544.0	626.0	37000.0	Level	Aus ATC (ADS-B)
Sun 09:05:10 PM	-40.1783	150.6732	↘ 116°	544.0	626.0	37000.0	Level	FlightAware ADS-B (YSFY)
Sun 09:05:17 PM	-40.186	150.6943	↘ 115°	545.0	627.0	37000.0	Level	Aus ATC (ADS-B)
Sun 09:05:22 PM	-40.1916	150.7097	↘ 115°	544.0	626.0	37000.0	Level	Aus ATC (ADS-B)
Sun 09:05:32 PM	-40.2022	150.7388	↘ 116°	545.0	627.0	37000.0	Level	Aus ATC (ADS-B)
Sun 09:05:40 PM	-40.2107	150.7625	↘ 115°	545.0	627.0	37000.0	Level	FlightAware ADS-B (YSFY)
Sun 09:05:47 PM	-40.2185	150.7838	↘ 115°	546.0	628.0	37000.0	Level	Aus ATC (ADS-B)
Sun 09:05:57 PM	-40.2281	150.8104	↘ 115°	547.0	629.0	37000.0	Level	Aus ATC (ADS-B)
Sun 09:06:02 PM	-40.2346	150.8284	↘ 115°	547.0	629.0	37000.0	Level	Aus ATC (ADS-B)
Sun 09:06:12 PM	-40.2453	150.8577	↘ 115°	547.0	629.0	37000.0	Level	Aus ATC (ADS-B)
Sun 09:06:17 PM	-40.2508	150.8729	↘ 116°	547.0	629.0	37000.0	Level	Aus ATC (ADS-B)
Sun 09:06:22 PM	-40.2551	150.8848	↘ 116°	547.0	629.0	37000.0	Level	Aus ATC (ADS-B)
Sun 09:06:32 PM	-40.267	150.9174	↘ 116°	546.0	628.0	37000.0	Level	Aus ATC (ADS-B)
Sun 09:06:40 PM	-40.2756	150.941	↘ 116°	546.0	628.0	37000.0	Level	FlightAware ADS-B (YSFY)
Sun 09:06:42 PM	-40.2778	150.9472	↘ 115°	546.0	628.0	37000.0	Level	Aus ATC (ADS-B)
Sun 09:07:10 PM	-40.3082	151.0307	↘ 115°	547.0	629.0	37000.0	Level	FlightAware ADS-B (YSFY)
Sun 09:07:22 PM	-40.321	151.0658	↘ 116°	547.0	629.0	37000.0	Level	Aus ATC (ADS-B)
Sun 09:07:27 PM	-40.3266	151.0812	↘ 116°	547.0	629.0	37000.0	Level	Aus ATC (ADS-B)
Sun 09:07:37 PM	-40.3373	151.1105	↘ 115°	547.0	629.0	37000.0	Level	Aus ATC (ADS-B)
Sun 09:07:42 PM	-40.3427	151.1255	↘ 115°	547.0	629.0	37000.0	Level	Aus ATC (ADS-B)
Sun 09:07:47 PM	-40.3481	151.1404	↘ 115°	548.0	631.0	37000.0	Level	Aus ATC (ADS-B)
Sun 09:07:52 PM	-40.3537	151.1559	↘ 115°	548.0	631.0	37000.0	Level	Aus ATC (ADS-B)
Sun 09:07:57 PM	-40.3589	151.1704	↘ 116°	548.0	631.0	37000.0	Level	Aus ATC (ADS-B)
Sun 09:08:07 PM	-40.3699	151.2008	↘ 115°	548.0	631.0	37000.0	Level	Aus ATC (ADS-B)
Sun 09:08:12 PM	-40.3751	151.2152	↘ 116°	548.0	631.0	37000.0	Level	Aus ATC (ADS-B)
Sun 09:08:22 PM	-40.3858	151.2448	↘ 115°	548.0	631.0	37000.0	83 Climbing	Aus ATC (ADS-B)
Sun 09:08:30 PM	-40.3947	151.2694	↘ 115°	548.0	631.0	37025.0	Level	FlightAware ADS-B (BWT / YWYY)
Sun 09:08:37 PM	-40.4023	151.2904	↘ 115°	548.0	631.0	37000.0	-88 Descending	Aus ATC (ADS-B)
Sun 09:08:47 PM	-40.4132	151.3207	↘ 115°	548.0	631.0	37000.0	Level	Aus ATC (ADS-B)
Sun 09:08:52 PM	-40.4184	151.3352	↘ 116°	548.0	631.0	37000.0	Level	Aus ATC (ADS-B)
Sun 09:08:57 PM	-40.4237	151.35	↘ 115°	548.0	631.0	37000.0	Level	Aus ATC (ADS-B)
Sun 09:09:02 PM	-40.4292	151.365	↘ 116°	548.0	631.0	37000.0	115 Climbing	Aus ATC (ADS-B)
Sun 09:09:10 PM	-40.4376	151.3884	↘ 115°	548.0	631.0	37025.0	Level	FlightAware ADS-B (YSFY)
Sun 09:09:12 PM	-40.44	151.3951	↘ 114°	548.0	631.0	37000.0	-214 Descending	Aus ATC (ADS-B)
Sun 09:09:17 PM	-40.4453	151.4098	↘ 115°	548.0	631.0	37000.0	Level	Aus ATC (ADS-B)
Sun 09:09:27 PM	-40.4561	151.4399	↘ 115°	548.0	631.0	37000.0	Level	Aus ATC (ADS-B)
Sun 09:09:32 PM	-40.4617	151.4555	↘ 115°	548.0	631.0	37000.0	Level	Aus ATC (ADS-B)
Sun 09:09:37 PM	-40.4668	151.4697	↘ 116°	548.0	631.0	37000.0	188 Climbing	Aus ATC (ADS-B)
Sun 09:09:40 PM	-40.4698	151.478	↘ 115°	548.0	631.0	37025.0	Level	FlightAware ADS-B (YSFY)
Sun 09:09:47 PM	-40.4776	151.5	↘ 115°	548.0	631.0	37000.0	-125 Descending	Aus ATC (ADS-B)
Sun 09:09:52 PM	-40.483	151.5148	↘ 115°	548.0	631.0	37000.0	Level	Aus ATC (ADS-B)
Sun 09:10:02 PM	-40.4936	151.5447	↘ 115°	548.0	631.0	37000.0	83 Climbing	Aus ATC (ADS-B)
Sun 09:10:10 PM	-40.5022	151.569	↘ 115°	547.0	629.0	37025.0	Level	FlightAware ADS-B (YSFY)
Sun 09:10:36 PM	-40.5312	151.6503	↘ 115°	546.0	628.0	37000.0	-48 Descending	Aus ATC (ADS-B)
Sun 09:10:41 PM	-40.5363	151.6647	↘ 115°	546.0	628.0	37000.0	Level	Aus ATC (ADS-B)
Sun 09:10:51 PM	-40.5471	151.6949	↘ 115°	546.0	628.0	37000.0	Level	Aus ATC (ADS-B)
Sun 09:10:56 PM	-40.5524	151.7099	↘ 115°	546.0	628.0	37000.0	Level	Aus ATC (ADS-B)
Sun 09:11:01 PM	-40.5577	151.7247	↘ 115°	546.0	628.0	37000.0	Level	Aus ATC (ADS-B)
Sun 09:11:06 PM	-40.5615	151.7355	↘ 115°	546.0	628.0	37000.0	Level	FlightAware ADS-B (YSFY)
Sun 09:11:11 PM	-40.5683	151.7549	↘ 114°	546.0	628.0	37000.0	Level	Aus ATC (ADS-B)
Sun 09:11:16 PM	-40.5736	151.7697	↘ 116°	546.0	628.0	37000.0	Level	Aus ATC (ADS-B)
Sun 09:11:26 PM	-40.5831	151.7967	↘ 115°	546.0	628.0	37000.0	-75 Descending	Aus ATC (ADS-B)
Sun 09:11:36 PM	-40.5941	151.8278	↘ 115°	547.0	629.0	36975.0	Level	FlightAware ADS-B (YSFY)
Sun 09:11:41 PM	-40.6001	151.8444	↘ 116°	547.0	629.0	37000.0	100 Climbing	Aus ATC (ADS-B)
Sun 09:11:51 PM	-40.6107	151.8747	↘ 115°	547.0	629.0	37000.0	Level	Aus ATC (ADS-B)
Sun 09:12:01 PM	-40.6214	151.9051	↘ 115°	546.0	628.0	37000.0	-100 Descending	Aus ATC (ADS-B)
Sun 09:12:06 PM	-40.6261	151.9181	↘ 115°	546.0	628.0	36975.0	Level	FlightAware ADS-B (YSFY)
Sun 09:12:16 PM	-40.6371	151.9492	↘ 115°	547.0	629.0	37000.0	100 Climbing	Aus ATC (ADS-B)
Sun 09:12:21 PM	-40.6425	151.9647	↘ 114°	546.0	628.0	37000.0	Level	Aus ATC (ADS-B)
Sun 09:12:26 PM	-40.6477	151.9796	↘ 115°	546.0	628.0	37000.0	Level	Aus ATC (ADS-B)
Sun 09:12:36 PM	-40.6583	152.0096	↘ 115°	546.0	628.0	37000.0	Level	Aus ATC (ADS-B)
Sun 09:12:41 PM	-40.6636	152.0247	↘ 115°	546.0	628.0	37000.0	Level	Aus ATC (ADS-B)
Sun 09:12:46 PM	-40.668	152.0371	↘ 116°	546.0	628.0	37000.0	Level	Aus ATC (ADS-B)
Sun 09:12:51 PM	-40.6742	152.0548	↘ 115°	546.0	628.0	37000.0	Level	Aus ATC (ADS-B)
Sun 09:13:01 PM	-40.6848	152.0852	↘ 115°	546.0	628.0	37000.0	Level	Aus ATC (ADS-B)
Sun 09:13:06 PM	-40.6902	152.1004	↘ 115°	546.0	628.0	37000.0	Level	Aus ATC (ADS-B)
Sun 09:13:16 PM	-40.7007	152.1303	↘ 115°	546.0	628.0	37000.0	Level	Aus ATC (ADS-B)
Sun 09:13:31 PM	-40.7166	152.1759	↘ 115°	547.0	629.0	37000.0	Level	Aus ATC (ADS-B)
Sun 09:13:36 PM	-40.7218	152.1908	↘ 115°	547.0	629.0	37000.0	Level	FlightAware ADS-B (YSFY)
Sun 09:13:41 PM	-40.7268	152.2051	↘ 115°	547.0	629.0	37000.0	Level	Aus ATC (ADS-B)
Sun 09:13:46 PM	-40.7322	152.2207	↘ 115°	547.0	629.0	37000.0	Level	Aus ATC (ADS-B)
Sun 09:13:51 PM	-40.7375	152.2357	↘ 115°	547.0	629.0	37000.0	Level	Aus ATC (ADS-B)
Sun 09:13:56 PM	-40.7427	152.2507	↘ 115°	547.0	629.0	37000.0	Level	Aus ATC (ADS-B)
Sun 09:14:06 PM	-40.7532	152.2807	↘ 115°	547.0	629.0	37000.0	Level	Aus ATC (ADS-B)
Sun 09:14:11 PM	-40.7585	152.2963	↘ 115°	547.0	629.0	37000.0	Level	Aus ATC (ADS-B)
Sun 09:14:16 PM	-40.7638	152.3114	↘ 115°	547.0	629.0	37000.0	Level	Aus ATC (ADS-B)
Sun 09:14:26 PM	-40.7745	152.342	↘ 114°	546.0	628.0	37000.0	Level	Aus ATC (ADS-B)
Sun 09:14:31 PM	-40.7796	152.3565	↘ 115°	547.0	629.0	37000.0	Level	Aus ATC (ADS-B)
Sun 09:14:36 PM	-40.7847	152.3714	↘ 115°	547.0	629.0	37000.0	Level	FlightAware ADS-B (YSFY)
Sun 09:14:41 PM	-40.7899	152.3865	↘ 114°	546.0	628.0	37000.0	Level	Aus ATC (ADS-B)
Sun 09:14:56 PM	-40.8054	152.4311	↘ 114°	546.0	628.0	37000.0	Level	Aus ATC (ADS-B)
Sun 09:15:07 PM	-40.8163	152.4624	↘ 115°	547.0	629.0	37000.0	Level	FlightAware ADS-B (YSFY)
Sun 09:15:37 PM	-40.8478	152.5537	↘ 114°	547.0	629.0	37000.0	Level	FlightAware ADS-B (YSFY)
Sun 09:16:07 PM	-40.8796	152.6462	↘ 114°	547.0	629.0	37000.0	Level	FlightAware ADS-B (YSFY)
Sun 09:17:00 PM	-40.9339	152.8047	↘ 114°	547.0	629.0	37000.0	Level	FlightAware ADS-B (YSFY)
Sun 09:17:32 PM	-40.9673	152.9025	↘ 114°	547.0	629.0	37000.0	Level	FlightAware ADS-B (YSFY)
Sun 09:18:22 PM	-41.0181	153.0523	↘ 114°	547.0	629.0	37000.0	Level	FlightAware ADS-B (YSFY)
Sun 09:18:53 PM	-41.0506	153.1483	↘ 114°	546.0	628.0	37000.0	Level	FlightAware ADS-B (YSFY)
Sun 10:18:58 PM	-44.2077	164.8071	→ 106°	552.0	635.0	37000.0	Level	FlightAware ADS-B (ALR / NZLX)
Sun 10:21:14 PM	-44.3033	165.2729	→ 106°	552.0	635.0	37025.0	Level	FlightAware ADS-B (ALR / NZLX)
Sun 10:21:48 PM	-44.3259	165.385	→ 106°	550.0	633.0	37025.0	-21 Descending	FlightAware ADS-B (ALR / NZLX)
Sun 10:22:24 PM	-44.352	165.515	→ 106°	549.0	632.0	37000.0	-23 Descending	FlightAware ADS-B (NZTZ)
Sun 10:22:54 PM	-44.3725	165.6176	→ 106°	548.0	631.0	37000.0	-22 Descending	FlightAware ADS-B (NZTZ)
Sun 10:23:32 PM	-44.3978	165.7447	→ 106°	549.0	632.0	36975.0	Level	FlightAware ADS-B (NZTZ)
Sun 10:24:17 PM	-44.4276	165.8953	→ 105°	549.0	632.0	37000.0	16 Climbing	FlightAware ADS-B (ALR / NZLX)
Sun 10:25:08 PM	-44.4626	166.0735	→ 105°	548.0	631.0	37000.0	Level	FlightAware ADS-B (NZTZ)
Sun 10:25:43 PM	-44.4852	166.1899	→ 105°	548.0	631.0	37000.0	21 Climbing	FlightAware ADS-B (ALR / NZLX)
Sun 10:26:20 PM	-44.5091	166.3136	→ 105°	547.0	629.0	37025.0	Level	FlightAware ADS-B (NZDC)
Sun 10:26:54 PM	-44.531	166.4271	→ 105°	547.0	629.0	37000.0	-877 Descending	FlightAware ADS-B (ALR / NZLX)
Sun 10:27:25 PM	-44.5517	166.5355	→ 105°	557.0	641.0	36075.0	-2,016 Descending	FlightAware ADS-B (NZDC)
Sun 10:27:55 PM	-44.5707	166.6359	→ 105°	556.0	640.0	34950.0	-2,287 Descending	FlightAware ADS-B (NZDC)
Sun 10:28:26 PM	-44.5923	166.7496	→ 105°	556.0	640.0	33750.0	-2,287 Descending	FlightAware ADS-B (NZDC)
Sun 10:28:56 PM	-44.6112	166.8542	→ 101°	552.0	635.0	32625.0	-2,490 Descending	FlightAware ADS-B (NZDC)
Sun 10:29:16 PM	-44.6153	166.9242	→ 90°	545.0	627.0	31675.0	-2,850 Descending	FlightAware ADS-B (NZDC)
Sun 10:29:46 PM	-44.6111	167.0278	→ 87°	548.0	631.0	30250.0	-2,475 Descending	FlightAware ADS-B (NZDC)
Sun 10:30:16 PM	-44.6069	167.1337	→ 87°	545.0	627.0	29200.0	-2,226 Descending	FlightAware ADS-B (NZDC)
Sun 10:30:48 PM	-44.6027	167.2496	→ 87°	540.0	621.0	27950.0	-2,286 Descending	FlightAware ADS-B (ALR / NZLX)
Sun 10:31:19 PM	-44.5999	167.3576	→ 91°	537.0	618.0	26800.0	-2,386 Descending	FlightAware ADS-B (ALR / NZLX)
Sun 10:31:54 PM	-44.6065	167.4806	→ 95°	536.0	617.0	25325.0	-2,308 Descending	FlightAware ADS-B (NZTZ)
Sun 10:32:24 PM	-44.6122	167.5824	→ 94°	521.0	600.0	24300.0	-2,100 Descending	FlightAware ADS-B (NZTZ)
Sun 10:32:54 PM	-44.6176	167.6824	→ 94°	493.0	567.0	23225.0	-2,250 Descending	FlightAware ADS-B (NZTZ)
Sun 10:33:24 PM	-44.6225	167.7734	→ 94°	468.0	539.0	22050.0	-2,175 Descending	FlightAware ADS-B (NZTZ)
Sun 10:33:54 PM	-44.6274	167.8649	→ 94°	457.0	526.0	21050.0	-2,016 Descending	FlightAware ADS-B (NZTZ)
Sun 10:34:25 PM	-44.6318	167.9497	→ 94°	452.0	520.0	20000.0	-2,139 Descending	FlightAware ADS-B (NZTZ)
Sun 10:34:55 PM	-44.6367	168.0411	→ 94°	445.0	512.0	18875.0	-2,125 Descending	FlightAware ADS-B (NZTZ)
Sun 10:35:25 PM	-44.6409	168.1266	→ 94°	435.0	501.0	17875.0	-2,016 Descending	FlightAware ADS-B (NZTZ)
Sun 10:35:56 PM	-44.6452	168.2107	→ 94°	430.0	495.0	16825.0	-1,820 Descending	FlightAware ADS-B (NZTZ)
Sun 10:36:26 PM	-44.6492	168.2929	→ 94°	414.0	476.0	16024.999999999998	-1,150 Descending	FlightAware ADS-B (NZTZ)
Sun 10:36:56 PM	-44.6529	168.3713	→ 94°	397.0	457.0	15675.0	-766 Descending	FlightAware ADS-B (NZTZ)
Sun 10:37:13 PM	-44.66	168.4126	↘ 113°	383.0	441.0	15425.0	-1,114 Descending	FlightAware ADS-B (NZTZ)
Sun 10:37:31 PM	-44.6763	168.4445	↘ 136°	361.0	415.0	15025.0	-1,406 Descending	FlightAware ADS-B (IVC / NZNV)
Sun 10:38:01 PM	-44.7173	168.4894	↘ 142°	349.0	402.0	14300.0	-1,425 Descending	FlightAware ADS-B (NZTZ)
Sun 10:38:31 PM	-44.7546	168.5304	↘ 142°	342.0	394.0	13600.0	-1,444 Descending	FlightAware ADS-B (NZTZ)
Sun 10:38:55 PM	-44.7839	168.5627	↘ 144°	331.0	381.0	13000.0	-1,086 Descending	FlightAware ADS-B (IVC / NZNV)
Sun 10:39:29 PM	-44.8266	168.5974	↘ 151°	313.0	360.0	12550.0	-680 Descending	FlightAware ADS-B (ALR / NZLX)
Sun 10:39:59 PM	-44.8651	168.6274	↘ 151°	299.0	344.0	12275.0	-587 Descending	FlightAware ADS-B (ALR / NZLX)
Sun 10:40:15 PM	-44.8834	168.6428	↘ 143°	304.0	350.0	12100.0	-917 Descending	FlightAware ADS-B (IVC / NZNV)
Sun 10:40:35 PM	-44.9001	168.6744	↘ 111°	320.0	368.0	11725.0	-1,115 Descending	FlightAware ADS-B (IVC / NZNV)
Sun 10:40:54 PM	-44.9037	168.7151	→ 91°	322.0	371.0	11375.0	-1,028 Descending	FlightAware ADS-B (IVC / NZNV)
Sun 10:41:29 PM	-44.9051	168.7888	→ 92°	310.0	357.0	10800.0	-1,130 Descending	FlightAware ADS-B (NZTL)
Sun 10:42:03 PM	-44.9076	168.8518	→ 94°	303.0	349.0	10075.0	-1,008 Descending	FlightAware ADS-B (ALR / NZLX)
Sun 10:42:33 PM	-44.9097	168.9111	→ 93°	278.0	320.0	9725.0	-969 Descending	FlightAware ADS-B (ALR / NZLX)
Sun 10:43:08 PM	-44.9117	168.9724	→ 93°	255.0	293.0	9025.0	-1,118 Descending	FlightAware ADS-B (ALR / NZLX)
Sun 10:43:28 PM	-44.9162	169.0044	→ 110°	246.0	283.0	8700.0	-1,313 Descending	FlightAware ADS-B (ALR / NZLX)
Sun 10:43:48 PM	-44.928	169.0311	↘ 128°	239.0	275.0	8150.0	-1,737 Descending	FlightAware ADS-B (ALR / NZLX)
Sun 10:44:06 PM	-44.9429	169.0505	↘ 145°	238.0	274.0	7600.0	-1,500 Descending	FlightAware ADS-B (ALR / NZLX)
Sun 10:44:27 PM	-44.9616	169.0634	↓ 161°	225.0	259.0	7175.0	-1,244 Descending	FlightAware ADS-B (ALR / NZLX)
Sun 10:44:47 PM	-44.982	169.0686	↓ 176°	218.0	251.0	6750.0	-1,233 Descending	FlightAware ADS-B (ALR / NZLX)
Sun 10:45:12 PM	-45.0048	169.0622	↙ 205°	197.0	227.0	6250.0	-1,167 Descending	FlightAware ADS-B (ALR / NZLX)
Sun 10:45:32 PM	-45.0201	169.0476	↙ 223°	192.0	221.0	5875.0	-1,077 Descending	FlightAware ADS-B (ALR / NZLX)
Sun 10:45:51 PM	-45.0298	169.0292	↙ 242°	187.0	215.0	5550.0	-1,000 Descending	FlightAware ADS-B (ALR / NZLX)
Sun 10:46:11 PM	-45.0352	169.0073	← 259°	183.0	211.0	5225.0	-1,042 Descending	FlightAware ADS-B (ALR / NZLX)
Sun 10:46:27 PM	-45.0362	168.988	← 273°	182.0	209.0	4925.0	-1,071 Descending	FlightAware ADS-B (ALR / NZLX)
Sun 10:46:46 PM	-45.0331	168.9655	← 287°	174.0	200.0	4600.0	-1,023 Descending	FlightAware ADS-B (ALR / NZLX)
Sun 10:47:11 PM	-45.0244	168.9406	← 302°	166.0	191.0	4175.0	-1,012 Descending	FlightAware ADS-B (ALR / NZLX)
Sun 10:47:29 PM	-45.0175	168.9247	← 301°	163.0	188.0	3875.0	-1,000 Descending	FlightAware ADS-B (ALR / NZLX)
