# Supplementary material for: TrackMatcher – a tool for finding intercepts in tracks of geographical positions
Source: Copernicus journal article supplement (doi:10.5194/gmd-15-7557-2022), 2022-10-18
Supplement: Supplementary file 1 [file gmd-15-7557-2022-supplement.zip › ESM/example/data/flights/JST220_27-JAN-2019_NZQN-YMML.dat]

Time (CET)	Latitude	Longitude	Course	kts	mph	feet	Rate	Reporting Facility
Sun 08:39:20 AM	-45.1063	168.7263	↘ 141°	203.0	234.0	6600.0	Level	FlightAware ADS-B (ALR / NZLX)
Sun 08:39:40 AM	-45.1228	168.7393	↓ 158°	206.0	237.0	7175.0	1,763 Climbing	FlightAware ADS-B (ALR / NZLX)
Sun 08:40:00 AM	-45.1414	168.7454	↓ 174°	203.0	234.0	7775.0	1,640 Climbing	FlightAware ADS-B (ALR / NZLX)
Sun 08:40:23 AM	-45.1629	168.7442	↓ 185°	211.0	243.0	8350.0	1,238 Climbing	FlightAware ADS-B (IVC / NZNV)
Sun 08:40:40 AM	-45.18	168.7425	↓ 184°	231.0	266.0	8600.0	821 Climbing	FlightAware ADS-B (ALR / NZLX)
Sun 08:41:05 AM	-45.2087	168.7399	↓ 186°	268.0	308.0	8925.0	1,286 Climbing	FlightAware ADS-B (ALR / NZLX)
Sun 08:41:29 AM	-45.2368	168.7276	↙ 207°	271.0	312.0	9650.0	2,433 Climbing	FlightAware ADS-B (IVC / NZNV)
Sun 08:41:50 AM	-45.2576	168.7053	↙ 225°	257.0	296.0	10750.0	2,797 Climbing	FlightAware ADS-B (NZTZ)
Sun 08:42:06 AM	-45.2691	168.6833	↙ 240°	255.0	293.0	11375.0	2,524 Climbing	FlightAware ADS-B (NZTZ)
Sun 08:42:31 AM	-45.2783	168.6459	← 260°	246.0	283.0	12475.0	2,659 Climbing	FlightAware ADS-B (NZTZ)
Sun 08:42:50 AM	-45.2788	168.6142	← 276°	243.0	280.0	13325.0	2,500 Climbing	FlightAware ADS-B (NZTZ)
Sun 08:43:10 AM	-45.2732	168.5839	← 292°	244.0	281.0	14100.0	2,250 Climbing	FlightAware ADS-B (NZTZ)
Sun 08:43:34 AM	-45.2591	168.5522	← 311°	248.0	285.0	14975.0	2,036 Climbing	FlightAware ADS-B (NZDC)
Sun 08:43:52 AM	-45.2428	168.5324	↖ 326°	258.0	297.0	15525.0	1,438 Climbing	FlightAware ADS-B (DUD / NZDN)
Sun 08:44:22 AM	-45.2127	168.5055	↖ 327°	281.0	323.0	16125.0	1,025 Climbing	FlightAware ADS-B (DUD / NZDN)
Sun 08:44:52 AM	-45.1767	168.4731	↖ 328°	307.0	353.0	16550.0	689 Climbing	FlightAware ADS-B (DUD / NZDN)
Sun 08:45:23 AM	-45.1403	168.4404	↖ 327°	330.0	380.0	16825.0	847 Climbing	FlightAware ADS-B (NZJS)
Sun 08:45:54 AM	-45.096	168.4004	↖ 327°	347.0	399.0	17425.0	1,402 Climbing	FlightAware ADS-B (IVC / NZNV)
Sun 08:46:24 AM	-45.0558	168.3637	↖ 327°	352.0	405.0	18250.0	1,850 Climbing	FlightAware ADS-B (IVC / NZNV)
Sun 08:46:54 AM	-45.0143	168.3255	↖ 327°	348.0	400.0	19275.0	1,600 Climbing	FlightAware ADS-B (IVC / NZNV)
Sun 08:47:24 AM	-44.9749	168.2895	↖ 327°	351.0	404.0	19850.0	1,337 Climbing	FlightAware ADS-B (IVC / NZNV)
Sun 08:47:40 AM	-44.9534	168.2688	↖ 322°	348.0	400.0	20300.0	1,342 Climbing	FlightAware ADS-B (NZTZ)
Sun 08:48:02 AM	-44.9315	168.2286	← 296°	348.0	400.0	20700.0	1,125 Climbing	FlightAware ADS-B (DUD / NZDN)
Sun 08:48:40 AM	-44.9143	168.1469	← 285°	354.0	407.0	21425.0	1,239 Climbing	FlightAware ADS-B (NZTZ)
Sun 08:49:11 AM	-44.9004	168.0775	← 286°	358.0	412.0	22125.0	1,352 Climbing	FlightAware ADS-B (NZTZ)
Sun 08:49:41 AM	-44.8865	168.0093	← 286°	362.0	417.0	22800.0	1,230 Climbing	FlightAware ADS-B (NZTZ)
Sun 08:50:12 AM	-44.8719	167.9386	← 286°	370.0	426.0	23375.0	1,328 Climbing	FlightAware ADS-B (ALR / NZLX)
Sun 08:50:42 AM	-44.8576	167.8693	← 286°	370.0	426.0	24150.0	1,300 Climbing	FlightAware ADS-B (DUD / NZDN)
Sun 08:51:12 AM	-44.8434	167.8009	← 286°	375.0	432.0	24675.0	1,250 Climbing	FlightAware ADS-B (ALR / NZLX)
Sun 08:51:42 AM	-44.8282	167.7284	← 286°	373.0	429.0	25400.0	1,200 Climbing	FlightAware ADS-B (ALR / NZLX)
Sun 08:52:12 AM	-44.8137	167.6585	← 286°	378.0	435.0	25875.0	861 Climbing	FlightAware ADS-B (ALR / NZLX)
Sun 08:52:43 AM	-44.7987	167.5864	← 286°	384.0	442.0	26275.0	885 Climbing	FlightAware ADS-B (ALR / NZLX)
Sun 08:53:13 AM	-44.7835	167.5142	← 286°	387.0	445.0	26775.0	1,225 Climbing	FlightAware ADS-B (ALR / NZLX)
Sun 08:53:43 AM	-44.7692	167.4462	← 287°	382.0	440.0	27500.0	1,050 Climbing	FlightAware ADS-B (ALR / NZLX)
Sun 08:54:13 AM	-44.7532	167.3706	← 287°	386.0	444.0	27825.0	689 Climbing	FlightAware ADS-B (ALR / NZLX)
Sun 08:54:44 AM	-44.7377	167.2974	← 287°	388.0	447.0	28200.0	605 Climbing	FlightAware ADS-B (ALR / NZLX)
Sun 08:55:15 AM	-44.7212	167.22	← 287°	394.0	453.0	28450.0	713 Climbing	FlightAware ADS-B (ALR / NZLX)
Sun 08:55:45 AM	-44.7052	167.1458	← 287°	396.0	456.0	28925.0	725 Climbing	FlightAware ADS-B (NZTZ)
Sun 08:56:15 AM	-44.6894	167.0721	← 287°	403.0	464.0	29175.0	650 Climbing	FlightAware ADS-B (NZTZ)
Sun 08:56:45 AM	-44.6731	166.9961	← 287°	407.0	468.0	29575.0	875 Climbing	FlightAware ADS-B (ALR / NZLX)
Sun 08:57:15 AM	-44.6572	166.922	← 287°	410.0	472.0	30050.0	900 Climbing	FlightAware ADS-B (ALR / NZLX)
Sun 08:57:45 AM	-44.6404	166.8449	← 287°	413.0	475.0	30475.0	1,082 Climbing	FlightAware ADS-B (ALR / NZLX)
Sun 08:58:16 AM	-44.6236	166.768	← 287°	410.0	472.0	31150.0	1,451 Climbing	FlightAware ADS-B (ALR / NZLX)
Sun 08:58:46 AM	-44.6075	166.6942	← 287°	403.0	464.0	31950.0	1,400 Climbing	FlightAware ADS-B (ALR / NZLX)
Sun 08:59:16 AM	-44.5903	166.6158	← 287°	402.0	463.0	32549.999999999996	1,167 Climbing	FlightAware ADS-B (ALR / NZLX)
Sun 08:59:49 AM	-44.5729	166.5372	← 287°	400.0	460.0	33175.0	1,048 Climbing	FlightAware ADS-B (NZDC)
Sun 09:00:19 AM	-44.5565	166.4628	← 287°	401.0	461.0	33650.0	739 Climbing	FlightAware ADS-B (NZDC)
Sun 09:00:56 AM	-44.5356	166.3687	← 287°	396.0	456.0	34000.0	313 Climbing	FlightAware ADS-B (ALR / NZLX)
Sun 09:01:26 AM	-44.52	166.2989	← 287°	395.0	455.0	34000.0	Level	FlightAware ADS-B (ALR / NZLX)
Sun 09:01:56 AM	-44.5027	166.2216	← 287°	395.0	455.0	34000.0	Level	FlightAware ADS-B (ALR / NZLX)
Sun 09:02:26 AM	-44.4862	166.1481	← 287°	397.0	457.0	34000.0	Level	FlightAware ADS-B (ALR / NZLX)
Sun 09:03:25 AM	-44.4547	166.0082	← 288°	399.0	459.0	34000.0	Level	FlightAware ADS-B (ALR / NZLX)
Sun 09:04:06 AM	-44.4318	165.9075	← 288°	397.0	457.0	34000.0	Level	FlightAware ADS-B (NZTZ)
Sun 09:04:47 AM	-44.4091	165.8057	← 286°	396.0	456.0	34000.0	21 Climbing	FlightAware ADS-B (NZTZ)
Sun 09:05:17 AM	-44.3949	165.7318	← 285°	394.0	453.0	34025.0	Level	FlightAware ADS-B (NZTZ)
Sun 09:06:17 AM	-44.3667	165.5863	← 285°	391.0	450.0	34000.0	-17 Descending	FlightAware ADS-B (NZTZ)
Sun 09:06:47 AM	-44.3522	165.5135	← 286°	391.0	450.0	34000.0	-19 Descending	FlightAware ADS-B (NZTZ)
Sun 09:07:34 AM	-44.3294	165.4006	← 286°	391.0	450.0	33975.0	-19 Descending	FlightAware ADS-B (ALR / NZLX)
Sun 09:08:05 AM	-44.3135	165.3224	← 286°	390.0	449.0	33975.0	22 Climbing	FlightAware ADS-B (ALR / NZLX)
Sun 09:08:42 AM	-44.2956	165.2339	← 286°	390.0	449.0	34000.0	Level	FlightAware ADS-B (NZTZ)
Sun 09:09:23 AM	-44.2756	165.1358	← 286°	391.0	450.0	33975.0	Level	FlightAware ADS-B (ALR / NZLX)
Sun 09:10:32 AM	-44.2412	164.9683	← 286°	391.0	450.0	34000.0	22 Climbing	FlightAware ADS-B (ALR / NZLX)
Sun 10:48:37 AM	-40.8059	152.4317	← 295°	345.0	397.0	36000.0	Level	FlightAware ADS-B (YSFY)
Sun 10:49:13 AM	-40.7828	152.3652	← 295°	346.0	398.0	35975.0	-23 Descending	FlightAware ADS-B (YSFY)
Sun 10:49:43 AM	-40.7628	152.3076	← 295°	346.0	398.0	35975.0	25 Climbing	FlightAware ADS-B (YSFY)
Sun 10:50:13 AM	-40.7428	152.2501	← 295°	345.0	397.0	36000.0	25 Climbing	FlightAware ADS-B (YSFY)
Sun 10:50:43 AM	-40.7233	152.1942	← 295°	345.0	397.0	36000.0	Level	FlightAware ADS-B (YSFY)
Sun 10:51:06 AM	-40.7071	152.1478	← 295°	346.0	398.0	36000.0	Level	Aus ATC (ADS-B)
Sun 10:51:13 AM	-40.703	152.1361	← 295°	345.0	397.0	36000.0	Level	FlightAware ADS-B (YSFY)
Sun 10:51:16 AM	-40.7004	152.1286	← 295°	345.0	397.0	36000.0	Level	Aus ATC (ADS-B)
Sun 10:51:21 AM	-40.697	152.119	← 294°	345.0	397.0	36000.0	Level	Aus ATC (ADS-B)
Sun 10:51:26 AM	-40.6938	152.1098	← 295°	345.0	397.0	36000.0	Level	Aus ATC (ADS-B)
Sun 10:51:36 AM	-40.687	152.0906	← 295°	345.0	397.0	36000.0	Level	Aus ATC (ADS-B)
Sun 10:51:41 AM	-40.6844	152.083	← 293°	345.0	397.0	36000.0	Level	Aus ATC (ADS-B)
Sun 10:51:43 AM	-40.6826	152.0778	← 295°	345.0	397.0	36000.0	Level	FlightAware ADS-B (YSFY)
Sun 10:52:26 AM	-40.6539	151.9959	← 295°	344.0	396.0	36000.0	Level	Aus ATC (ADS-B)
Sun 10:52:31 AM	-40.6506	151.9866	← 295°	344.0	396.0	36000.0	Level	Aus ATC (ADS-B)
Sun 10:52:41 AM	-40.6439	151.9676	← 295°	345.0	397.0	36000.0	Level	Aus ATC (ADS-B)
Sun 10:52:42 AM	-40.6435	151.9663	← 295°	344.0	396.0	36000.0	Level	FlightAware ADS-B (YSFY)
Sun 10:52:46 AM	-40.6404	151.9578	← 296°	344.0	396.0	36000.0	Level	Aus ATC (ADS-B)
Sun 10:52:51 AM	-40.6378	151.9505	← 294°	344.0	396.0	36000.0	Level	Aus ATC (ADS-B)
Sun 10:53:01 AM	-40.6312	151.9315	← 294°	344.0	396.0	36000.0	Level	Aus ATC (ADS-B)
Sun 10:53:06 AM	-40.6271	151.9201	← 294°	345.0	397.0	36000.0	Level	Aus ATC (ADS-B)
Sun 10:53:16 AM	-40.6204	151.9012	← 295°	345.0	397.0	36000.0	Level	Aus ATC (ADS-B)
Sun 10:53:37 AM	-40.6067	151.8624	← 295°	345.0	397.0	36000.0	Level	FlightAware ADS-B (YSFY)
Sun 10:53:56 AM	-40.5944	151.8274	← 295°	345.0	397.0	36000.0	Level	Aus ATC (ADS-B)
Sun 10:54:06 AM	-40.5871	151.8066	← 295°	345.0	397.0	36000.0	Level	Aus ATC (ADS-B)
Sun 10:54:11 AM	-40.5836	151.7967	← 294°	345.0	397.0	36000.0	Level	Aus ATC (ADS-B)
Sun 10:54:21 AM	-40.5769	151.7779	← 295°	345.0	397.0	36000.0	Level	Aus ATC (ADS-B)
Sun 10:54:26 AM	-40.5736	151.7687	← 295°	345.0	397.0	36000.0	Level	Aus ATC (ADS-B)
Sun 10:54:31 AM	-40.5703	151.7592	← 294°	345.0	397.0	36000.0	Level	Aus ATC (ADS-B)
Sun 10:54:36 AM	-40.5668	151.7494	← 296°	345.0	397.0	36000.0	Level	Aus ATC (ADS-B)
Sun 10:54:41 AM	-40.5635	151.7403	← 296°	345.0	397.0	36000.0	Level	Aus ATC (ADS-B)
Sun 10:54:51 AM	-40.5567	151.721	← 295°	345.0	397.0	36000.0	Level	Aus ATC (ADS-B)
Sun 10:54:56 AM	-40.5533	151.7115	← 295°	345.0	397.0	36000.0	Level	Aus ATC (ADS-B)
Sun 10:55:06 AM	-40.5467	151.6928	← 296°	345.0	397.0	36000.0	Level	Aus ATC (ADS-B)
Sun 10:55:21 AM	-40.5365	151.6643	← 295°	345.0	397.0	36000.0	Level	Aus ATC (ADS-B)
Sun 10:55:26 AM	-40.5332	151.6549	← 295°	344.0	396.0	36000.0	Level	FlightAware ADS-B (YSFY)
Sun 10:55:31 AM	-40.5298	151.6453	← 295°	344.0	396.0	36000.0	Level	Aus ATC (ADS-B)
Sun 10:55:36 AM	-40.5266	151.6363	← 296°	344.0	396.0	36000.0	Level	Aus ATC (ADS-B)
Sun 10:55:46 AM	-40.5198	151.6172	← 296°	345.0	397.0	36000.0	Level	Aus ATC (ADS-B)
Sun 10:55:51 AM	-40.5164	151.6077	← 296°	344.0	396.0	36000.0	Level	Aus ATC (ADS-B)
Sun 10:55:56 AM	-40.5127	151.5975	← 295°	345.0	397.0	36000.0	Level	FlightAware ADS-B (YSFY)
Sun 10:56:01 AM	-40.5097	151.5891	← 293°	345.0	397.0	36000.0	Level	Aus ATC (ADS-B)
Sun 10:56:16 AM	-40.4995	151.5605	← 295°	345.0	397.0	36000.0	Level	Aus ATC (ADS-B)
Sun 10:56:26 AM	-40.4924	151.5407	← 295°	345.0	397.0	36000.0	Level	FlightAware ADS-B (YSFY)
Sun 10:56:36 AM	-40.4866	151.5246	← 295°	344.0	396.0	36000.0	Level	Aus ATC (ADS-B)
Sun 10:56:45 AM	-40.4799	151.5058	← 295°	344.0	396.0	36000.0	Level	Aus ATC (ADS-B)
Sun 10:56:56 AM	-40.4722	151.484	← 295°	345.0	397.0	36000.0	Level	FlightAware ADS-B (YSFY)
Sun 10:57:05 AM	-40.466	151.4667	← 295°	344.0	396.0	36000.0	Level	Aus ATC (ADS-B)
Sun 10:57:20 AM	-40.4557	151.438	← 295°	344.0	396.0	36000.0	Level	Aus ATC (ADS-B)
Sun 10:57:27 AM	-40.4517	151.4269	← 295°	344.0	396.0	36000.0	Level	FlightAware ADS-B (YSFY)
Sun 10:57:30 AM	-40.449	151.4194	← 295°	344.0	396.0	36000.0	Level	Aus ATC (ADS-B)
Sun 10:57:40 AM	-40.4423	151.4008	← 296°	344.0	396.0	36000.0	Level	Aus ATC (ADS-B)
Sun 10:57:45 AM	-40.4389	151.3913	← 295°	343.0	395.0	36000.0	88 Climbing	Aus ATC (ADS-B)
Sun 10:57:57 AM	-40.4313	151.3704	← 295°	343.0	395.0	36025.0	Level	FlightAware ADS-B (YSFY)
Sun 10:58:00 AM	-40.4288	151.3634	← 296°	343.0	395.0	36000.0	-115 Descending	Aus ATC (ADS-B)
Sun 10:58:10 AM	-40.4221	151.3447	← 296°	343.0	395.0	36000.0	Level	Aus ATC (ADS-B)
Sun 10:58:20 AM	-40.4153	151.3258	← 295°	343.0	395.0	36000.0	Level	Aus ATC (ADS-B)
Sun 10:58:25 AM	-40.412	151.3166	← 295°	343.0	395.0	36000.0	Level	Aus ATC (ADS-B)
Sun 10:58:28 AM	-40.4103	151.3119	← 295°	343.0	395.0	36000.0	Level	FlightAware ADS-B (BWT / YWYY)
Sun 10:58:35 AM	-40.4053	151.2978	← 295°	343.0	395.0	36000.0	Level	Aus ATC (ADS-B)
Sun 10:58:40 AM	-40.4017	151.288	← 295°	343.0	395.0	36000.0	Level	Aus ATC (ADS-B)
Sun 10:58:45 AM	-40.3984	151.2788	← 295°	343.0	395.0	36000.0	Level	Aus ATC (ADS-B)
Sun 10:58:55 AM	-40.3916	151.26	← 295°	342.0	394.0	36000.0	Level	Aus ATC (ADS-B)
Sun 10:59:00 AM	-40.3883	151.2509	← 296°	342.0	394.0	36000.0	Level	Aus ATC (ADS-B)
Sun 10:59:15 AM	-40.3788	151.2246	← 295°	342.0	394.0	36000.0	Level	Aus ATC (ADS-B)
Sun 10:59:25 AM	-40.3715	151.2042	← 295°	342.0	394.0	36000.0	Level	Aus ATC (ADS-B)
Sun 10:59:40 AM	-40.3621	151.1783	← 296°	342.0	394.0	36000.0	Level	Aus ATC (ADS-B)
Sun 10:59:50 AM	-40.3546	151.1576	← 296°	342.0	394.0	36000.0	Level	Aus ATC (ADS-B)
Sun 10:59:55 AM	-40.3513	151.1484	← 294°	342.0	394.0	36000.0	Level	Aus ATC (ADS-B)
Sun 10:59:56 AM	-40.3515	151.1489	← 295°	342.0	394.0	36000.0	Level	FlightAware ADS-B (YSFY)
Sun 11:00:26 AM	-40.3305	151.091	← 295°	343.0	395.0	36000.0	Level	FlightAware ADS-B (YSFY)
Sun 11:00:30 AM	-40.3276	151.083	← 296°	343.0	395.0	36000.0	Level	Aus ATC (ADS-B)
Sun 11:00:35 AM	-40.3248	151.0753	← 296°	343.0	395.0	36000.0	Level	Aus ATC (ADS-B)
Sun 11:00:45 AM	-40.3173	151.0548	← 296°	343.0	395.0	36000.0	Level	Aus ATC (ADS-B)
Sun 11:00:50 AM	-40.3139	151.0455	← 295°	343.0	395.0	36000.0	Level	Aus ATC (ADS-B)
Sun 11:00:56 AM	-40.3098	151.0342	← 295°	344.0	396.0	36000.0	Level	FlightAware ADS-B (YSFY)
Sun 11:01:26 AM	-40.2893	150.9778	← 296°	344.0	396.0	36000.0	Level	FlightAware ADS-B (YSFY)
Sun 11:01:35 AM	-40.2832	150.9611	← 295°	343.0	395.0	36000.0	Level	Aus ATC (ADS-B)
Sun 11:01:45 AM	-40.2764	150.9424	← 296°	343.0	395.0	36000.0	Level	Aus ATC (ADS-B)
Sun 11:01:56 AM	-40.2692	150.9226	← 296°	344.0	396.0	36000.0	Level	FlightAware ADS-B (YSFY)
Sun 11:02:00 AM	-40.2663	150.9147	← 294°	343.0	395.0	36000.0	Level	Aus ATC (ADS-B)
Sun 11:02:10 AM	-40.2594	150.8957	← 295°	343.0	395.0	36000.0	Level	Aus ATC (ADS-B)
Sun 11:02:15 AM	-40.256	150.8866	← 295°	343.0	395.0	36000.0	Level	Aus ATC (ADS-B)
Sun 11:02:20 AM	-40.2533	150.8791	← 294°	343.0	395.0	36000.0	Level	Aus ATC (ADS-B)
Sun 11:02:26 AM	-40.2485	150.866	← 296°	344.0	396.0	36000.0	Level	FlightAware ADS-B (YSFY)
Sun 11:02:30 AM	-40.2457	150.8584	← 296°	343.0	395.0	36000.0	Level	Aus ATC (ADS-B)
Sun 11:02:35 AM	-40.2424	150.8494	← 297°	343.0	395.0	36000.0	Level	Aus ATC (ADS-B)
Sun 11:02:40 AM	-40.2389	150.8398	← 297°	343.0	395.0	36000.0	Level	Aus ATC (ADS-B)
Sun 11:02:45 AM	-40.2356	150.8307	← 295°	342.0	394.0	36000.0	Level	Aus ATC (ADS-B)
Sun 11:02:55 AM	-40.2287	150.8118	← 295°	342.0	394.0	36000.0	Level	Aus ATC (ADS-B)
Sun 11:02:57 AM	-40.2279	150.8098	← 295°	342.0	394.0	36000.0	Level	FlightAware ADS-B (YSFY)
Sun 11:03:27 AM	-40.2075	150.7538	← 296°	342.0	394.0	36000.0	Level	FlightAware ADS-B (YSFY)
Sun 11:03:50 AM	-40.1912	150.7096	← 296°	342.0	394.0	36000.0	Level	Aus ATC (ADS-B)
Sun 11:03:55 AM	-40.1879	150.7006	← 295°	342.0	394.0	36000.0	Level	Aus ATC (ADS-B)
Sun 11:03:57 AM	-40.1867	150.6973	← 296°	342.0	394.0	36000.0	Level	FlightAware ADS-B (YSFY)
Sun 11:04:00 AM	-40.1845	150.6914	← 297°	342.0	394.0	36000.0	Level	Aus ATC (ADS-B)
Sun 11:04:05 AM	-40.181	150.6821	← 297°	342.0	394.0	36000.0	Level	Aus ATC (ADS-B)
Sun 11:04:15 AM	-40.1743	150.6637	← 296°	342.0	394.0	36000.0	Level	Aus ATC (ADS-B)
Sun 11:04:20 AM	-40.1708	150.6543	← 295°	342.0	394.0	36000.0	Level	Aus ATC (ADS-B)
Sun 11:04:25 AM	-40.1675	150.6451	← 296°	342.0	394.0	36000.0	Level	Aus ATC (ADS-B)
Sun 11:04:42 AM	-40.1557	150.6132	← 296°	343.0	395.0	36000.0	Level	FlightAware ADS-B (SXE / YMES)
Sun 11:05:12 AM	-40.1341	150.555	← 296°	343.0	395.0	36000.0	Level	FlightAware ADS-B (SXE / YMES)
Sun 11:05:42 AM	-40.1129	150.4997	← 297°	344.0	396.0	36000.0	Level	FlightAware ADS-B (YDPO)
Sun 11:05:50 AM	-40.1083	150.4877	← 296°	343.0	395.0	36000.0	Level	Aus ATC (ADS-B)
Sun 11:06:00 AM	-40.1013	150.4691	← 296°	343.0	395.0	36000.0	Level	Aus ATC (ADS-B)
Sun 11:06:05 AM	-40.0977	150.4598	← 298°	343.0	395.0	36000.0	Level	Aus ATC (ADS-B)
Sun 11:06:10 AM	-40.0941	150.4506	← 297°	343.0	395.0	36000.0	Level	Aus ATC (ADS-B)
Sun 11:06:12 AM	-40.0931	150.448	← 297°	344.0	396.0	36000.0	Level	FlightAware ADS-B (BWT / YWYY)
Sun 11:06:15 AM	-40.0905	150.4412	← 297°	343.0	395.0	36000.0	Level	Aus ATC (ADS-B)
Sun 11:06:25 AM	-40.0835	150.4229	← 297°	343.0	395.0	36000.0	Level	Aus ATC (ADS-B)
Sun 11:06:30 AM	-40.0799	150.4135	← 297°	343.0	395.0	36000.0	Level	Aus ATC (ADS-B)
Sun 11:06:40 AM	-40.0729	150.3953	← 297°	343.0	395.0	36000.0	Level	Aus ATC (ADS-B)
Sun 11:06:42 AM	-40.0719	150.3928	← 297°	344.0	396.0	36000.0	Level	FlightAware ADS-B (BWT / YWYY)
Sun 11:06:55 AM	-40.0622	150.3675	← 296°	343.0	395.0	36000.0	Level	Aus ATC (ADS-B)
Sun 11:07:04 AM	-40.0551	150.349	← 297°	343.0	395.0	36000.0	Level	Aus ATC (ADS-B)
Sun 11:07:09 AM	-40.0515	150.3397	← 297°	343.0	395.0	36000.0	Level	Aus ATC (ADS-B)
Sun 11:07:13 AM	-40.0487	150.3324	← 296°	344.0	396.0	36000.0	Level	FlightAware ADS-B (SXE / YMES)
Sun 11:07:14 AM	-40.0481	150.3306	← 304°	344.0	396.0	36000.0	Level	Aus ATC (ADS-B)
Sun 11:07:19 AM	-40.0447	150.3217	← 296°	344.0	396.0	36000.0	Level	Aus ATC (ADS-B)
Sun 11:07:29 AM	-40.0375	150.303	← 296°	344.0	396.0	36000.0	Level	Aus ATC (ADS-B)
Sun 11:07:34 AM	-40.0339	150.2938	← 297°	344.0	396.0	36000.0	Level	Aus ATC (ADS-B)
Sun 11:07:39 AM	-40.0304	150.2844	← 296°	344.0	396.0	36000.0	Level	Aus ATC (ADS-B)
Sun 11:07:43 AM	-40.028	150.2783	← 297°	344.0	396.0	36000.0	Level	FlightAware ADS-B (YDPO)
Sun 11:08:13 AM	-40.006	150.221	← 297°	344.0	396.0	36000.0	Level	FlightAware ADS-B (YDPO)
Sun 11:08:29 AM	-39.9948	150.1919	← 297°	343.0	395.0	36000.0	Level	Aus ATC (ADS-B)
Sun 11:08:39 AM	-39.9877	150.1734	← 297°	344.0	396.0	36000.0	Level	Aus ATC (ADS-B)
Sun 11:08:43 AM	-39.9846	150.1654	← 297°	344.0	396.0	36000.0	Level	FlightAware ADS-B (YDPO)
Sun 11:08:44 AM	-39.9841	150.1643	← 312°	344.0	396.0	36000.0	Level	Aus ATC (ADS-B)
Sun 11:08:54 AM	-39.9772	150.1462	← 297°	345.0	397.0	36000.0	Level	Aus ATC (ADS-B)
Sun 11:08:59 AM	-39.9734	150.1363	← 297°	345.0	397.0	36000.0	Level	Aus ATC (ADS-B)
Sun 11:09:04 AM	-39.9699	150.1275	← 298°	346.0	398.0	36000.0	Level	Aus ATC (ADS-B)
Sun 11:09:14 AM	-39.9628	150.1089	← 297°	346.0	398.0	36000.0	Level	Aus ATC (ADS-B)
Sun 11:09:19 AM	-39.96	150.1016	← 297°	346.0	398.0	36000.0	Level	Aus ATC (ADS-B)
Sun 11:09:29 AM	-39.9521	150.0812	← 296°	346.0	398.0	36000.0	Level	Aus ATC (ADS-B)
Sun 11:09:39 AM	-39.9449	150.0627	← 297°	346.0	398.0	36000.0	Level	Aus ATC (ADS-B)
Sun 11:09:44 AM	-39.9412	150.0532	← 296°	346.0	398.0	36000.0	Level	Aus ATC (ADS-B)
Sun 11:09:54 AM	-39.934	150.0345	← 297°	346.0	398.0	36000.0	Level	Aus ATC (ADS-B)
Sun 11:10:09 AM	-39.9231	150.0066	← 297°	346.0	398.0	36000.0	Level	Aus ATC (ADS-B)
Sun 11:10:13 AM	-39.9197	149.998	← 297°	346.0	398.0	36000.0	Level	FlightAware ADS-B (SXE / YMES)
Sun 11:10:43 AM	-39.8982	149.9426	← 297°	346.0	398.0	36000.0	Level	FlightAware ADS-B (SXE / YMES)
Sun 11:10:49 AM	-39.8943	149.9328	← 296°	346.0	398.0	36000.0	50 Climbing	Aus ATC (ADS-B)
Sun 11:11:13 AM	-39.8768	149.8876	← 297°	346.0	398.0	36025.0	Level	FlightAware ADS-B (SXE / YMES)
Sun 11:11:34 AM	-39.8626	149.8513	← 297°	346.0	398.0	36000.0	-48 Descending	Aus ATC (ADS-B)
Sun 11:11:44 AM	-39.8548	149.831	← 297°	346.0	398.0	36000.0	Level	Aus ATC (ADS-B)
Sun 11:11:54 AM	-39.8475	149.8125	← 297°	345.0	397.0	36000.0	Level	Aus ATC (ADS-B)
Sun 11:11:59 AM	-39.8439	149.8031	← 295°	345.0	397.0	36000.0	Level	Aus ATC (ADS-B)
Sun 11:12:09 AM	-39.8367	149.7848	← 297°	345.0	397.0	36000.0	Level	Aus ATC (ADS-B)
Sun 11:12:14 AM	-39.8331	149.7756	← 296°	345.0	397.0	36000.0	Level	Aus ATC (ADS-B)
Sun 11:12:19 AM	-39.8295	149.7664	← 296°	344.0	396.0	36000.0	Level	Aus ATC (ADS-B)
Sun 11:12:24 AM	-39.8259	149.7571	← 298°	344.0	396.0	36000.0	Level	Aus ATC (ADS-B)
Sun 11:12:34 AM	-39.8189	149.7391	← 297°	344.0	396.0	36000.0	Level	Aus ATC (ADS-B)
Sun 11:12:39 AM	-39.8151	149.7296	← 298°	343.0	395.0	36000.0	Level	Aus ATC (ADS-B)
Sun 11:12:43 AM	-39.8117	149.7208	← 297°	343.0	395.0	36000.0	Level	FlightAware ADS-B (SXE / YMES)
Sun 11:13:13 AM	-39.7901	149.6658	← 297°	342.0	394.0	36000.0	Level	FlightAware ADS-B (SXE / YMES)
Sun 11:13:24 AM	-39.783	149.6474	← 296°	342.0	394.0	36000.0	Level	Aus ATC (ADS-B)
Sun 11:13:34 AM	-39.7758	149.6291	← 298°	343.0	395.0	36000.0	Level	Aus ATC (ADS-B)
Sun 11:13:39 AM	-39.7723	149.6204	← 298°	341.0	392.0	36000.0	Level	Aus ATC (ADS-B)
Sun 11:13:43 AM	-39.7684	149.6105	← 297°	342.0	394.0	36000.0	Level	FlightAware ADS-B (SXE / YMES)
Sun 11:14:09 AM	-39.7507	149.5653	← 297°	341.0	392.0	36000.0	-50 Descending	Aus ATC (ADS-B)
Sun 11:14:13 AM	-39.7471	149.556	← 297°	341.0	392.0	35975.0	Level	FlightAware ADS-B (SXE / YMES)
Sun 11:14:19 AM	-39.7436	149.5473	← 297°	341.0	392.0	36000.0	136 Climbing	Aus ATC (ADS-B)
Sun 11:14:24 AM	-39.7401	149.5383	← 298°	341.0	392.0	36000.0	Level	Aus ATC (ADS-B)
Sun 11:14:34 AM	-39.733	149.5201	← 297°	341.0	392.0	36000.0	-79 Descending	Aus ATC (ADS-B)
Sun 11:14:43 AM	-39.7252	149.5005	← 297°	341.0	392.0	35975.0	Level	FlightAware ADS-B (SXE / YMES)
Sun 11:14:49 AM	-39.7222	149.4929	← 296°	341.0	392.0	36000.0	94 Climbing	Aus ATC (ADS-B)
Sun 11:14:59 AM	-39.7151	149.4747	← 297°	341.0	392.0	36000.0	Level	Aus ATC (ADS-B)
Sun 11:15:14 AM	-39.7043	149.4474	← 297°	341.0	392.0	36000.0	Level	Aus ATC (ADS-B)
Sun 11:15:47 AM	-39.6805	149.3874	← 297°	342.0	394.0	36000.0	Level	FlightAware ADS-B (YDPO)
Sun 11:16:09 AM	-39.6644	149.3469	← 298°	343.0	395.0	36000.0	Level	Aus ATC (ADS-B)
Sun 11:16:14 AM	-39.661	149.3383	← 297°	342.0	394.0	36000.0	Level	Aus ATC (ADS-B)
Sun 11:16:17 AM	-39.6589	149.333	← 297°	342.0	394.0	36000.0	Level	FlightAware ADS-B (YDPO)
Sun 11:16:24 AM	-39.6536	149.3196	← 297°	343.0	395.0	36000.0	Level	Aus ATC (ADS-B)
Sun 11:16:39 AM	-39.6437	149.2947	← 297°	343.0	395.0	36000.0	Level	Aus ATC (ADS-B)
Sun 11:16:47 AM	-39.6378	149.28	← 297°	343.0	395.0	36000.0	Level	FlightAware ADS-B (YDPO)
Sun 11:16:49 AM	-39.6357	149.2746	← 297°	343.0	395.0	36000.0	Level	Aus ATC (ADS-B)
Sun 11:16:59 AM	-39.6285	149.2563	← 297°	343.0	395.0	36000.0	Level	Aus ATC (ADS-B)
Sun 11:17:04 AM	-39.6256	149.2491	← 299°	343.0	395.0	36000.0	Level	Aus ATC (ADS-B)
Sun 11:17:14 AM	-39.6176	149.229	← 297°	343.0	395.0	36000.0	Level	Aus ATC (ADS-B)
Sun 11:17:19 AM	-39.6147	149.2217	← 297°	343.0	395.0	36000.0	Level	Aus ATC (ADS-B)
Sun 11:17:23 AM	-39.6103	149.2106	← 297°	343.0	395.0	36000.0	Level	Aus ATC (ADS-B)
Sun 11:17:38 AM	-39.5994	149.1831	← 297°	343.0	395.0	36000.0	Level	Aus ATC (ADS-B)
Sun 11:17:43 AM	-39.5958	149.1743	← 298°	343.0	395.0	36000.0	Level	Aus ATC (ADS-B)
Sun 11:17:48 AM	-39.5922	149.1653	← 298°	343.0	395.0	36000.0	Level	Aus ATC (ADS-B)
Sun 11:17:58 AM	-39.5857	149.1489	← 298°	343.0	395.0	36000.0	Level	Aus ATC (ADS-B)
Sun 11:18:13 AM	-39.574	149.1195	← 297°	344.0	396.0	36000.0	Level	Aus ATC (ADS-B)
Sun 11:18:23 AM	-39.5675	149.1033	← 297°	344.0	396.0	36000.0	Level	Aus ATC (ADS-B)
Sun 11:18:38 AM	-39.5557	149.0738	← 298°	344.0	396.0	36000.0	Level	Aus ATC (ADS-B)
Sun 11:18:48 AM	-39.5483	149.0554	← 297°	343.0	395.0	36000.0	Level	Aus ATC (ADS-B)
Sun 11:18:53 AM	-39.5449	149.0467	← 298°	343.0	395.0	36000.0	214 Climbing	Aus ATC (ADS-B)
Sun 11:18:55 AM	-39.5428	149.0417	← 297°	344.0	396.0	36025.0	Level	FlightAware ADS-B (SXE / YMES)
Sun 11:18:58 AM	-39.5412	149.0377	← 296°	343.0	395.0	36000.0	-115 Descending	Aus ATC (ADS-B)
Sun 11:19:08 AM	-39.534	149.0196	← 297°	343.0	395.0	36000.0	Level	Aus ATC (ADS-B)
Sun 11:19:13 AM	-39.5302	149.0102	← 297°	343.0	395.0	36000.0	600 Climbing	Aus ATC (ADS-B)
Sun 11:19:18 AM	-39.5272	149.0028	← 298°	343.0	395.0	36100.0	Level	Aus ATC (ADS-B)
Sun 11:19:23 AM	-39.5228	148.9919	← 297°	343.0	395.0	36000.0	-346 Descending	Aus ATC (ADS-B)
Sun 11:19:31 AM	-39.5167	148.9764	← 297°	344.0	396.0	36025.0	Level	FlightAware ADS-B (YDPO)
Sun 11:19:33 AM	-39.5156	148.9738	← 303°	343.0	395.0	36000.0	-214 Descending	Aus ATC (ADS-B)
Sun 11:19:38 AM	-39.512	148.9648	← 297°	343.0	395.0	36000.0	Level	Aus ATC (ADS-B)
Sun 11:19:48 AM	-39.5047	148.9467	← 297°	343.0	395.0	36000.0	Level	Aus ATC (ADS-B)
Sun 11:20:03 AM	-39.4939	148.9196	← 297°	343.0	395.0	36000.0	Level	Aus ATC (ADS-B)
Sun 11:20:13 AM	-39.4866	148.9013	← 297°	343.0	395.0	36000.0	50 Climbing	Aus ATC (ADS-B)
Sun 11:20:33 AM	-39.4721	148.8656	← 298°	343.0	395.0	36025.0	Level	FlightAware ADS-B (BSJ / YBNS)
Sun 11:20:48 AM	-39.4611	148.8382	← 297°	343.0	395.0	36000.0	-50 Descending	Aus ATC (ADS-B)
Sun 11:21:03 AM	-39.4513	148.8141	← 298°	343.0	395.0	36000.0	Level	FlightAware ADS-B (BSJ / YBNS)
Sun 11:21:38 AM	-39.4244	148.7474	← 298°	343.0	395.0	36000.0	Level	Aus ATC (ADS-B)
Sun 11:21:48 AM	-39.4173	148.7297	← 298°	343.0	395.0	36000.0	Level	Aus ATC (ADS-B)
Sun 11:22:03 AM	-39.4061	148.7021	← 297°	344.0	396.0	36000.0	-79 Descending	Aus ATC (ADS-B)
Sun 11:22:07 AM	-39.4023	148.6928	← 298°	344.0	396.0	35975.0	Level	FlightAware ADS-B (LST / YMLT)
Sun 11:22:13 AM	-39.3988	148.684	← 297°	344.0	396.0	36000.0	136 Climbing	Aus ATC (ADS-B)
Sun 11:22:18 AM	-39.3952	148.6751	← 298°	344.0	396.0	36000.0	Level	Aus ATC (ADS-B)
Sun 11:22:23 AM	-39.3923	148.6679	← 298°	344.0	396.0	36000.0	Level	Aus ATC (ADS-B)
Sun 11:22:28 AM	-39.3877	148.6567	← 298°	344.0	396.0	36000.0	Level	Aus ATC (ADS-B)
Sun 11:22:38 AM	-39.3803	148.6386	← 298°	344.0	396.0	36000.0	Level	Aus ATC (ADS-B)
Sun 11:22:42 AM	-39.3767	148.6297	← 298°	344.0	396.0	36000.0	Level	FlightAware ADS-B (LST / YMLT)
Sun 11:22:43 AM	-39.3767	148.6298	← 264°	344.0	396.0	36000.0	Level	Aus ATC (ADS-B)
Sun 11:23:12 AM	-39.356	148.5788	← 298°	345.0	397.0	36000.0	Level	FlightAware ADS-B (YSFY)
Sun 11:23:28 AM	-39.3433	148.5478	← 298°	346.0	398.0	36000.0	Level	Aus ATC (ADS-B)
Sun 11:23:31 AM	-39.3416	148.5434	← 298°	346.0	398.0	36000.0	Level	FlightAware ADS-B (YDPO)
Sun 11:23:38 AM	-39.336	148.5297	← 299°	346.0	398.0	36000.0	Level	Aus ATC (ADS-B)
Sun 11:23:53 AM	-39.3249	148.5024	← 298°	346.0	398.0	36000.0	65 Climbing	Aus ATC (ADS-B)
Sun 11:24:01 AM	-39.3194	148.4889	← 298°	345.0	397.0	36025.0	Level	FlightAware ADS-B (YTDN)
Sun 11:24:03 AM	-39.3175	148.4842	← 298°	345.0	397.0	36000.0	-214 Descending	Aus ATC (ADS-B)
Sun 11:24:08 AM	-39.3137	148.475	← 299°	346.0	398.0	36000.0	Level	Aus ATC (ADS-B)
Sun 11:24:18 AM	-39.3064	148.4571	← 298°	345.0	397.0	36000.0	Level	Aus ATC (ADS-B)
Sun 11:24:23 AM	-39.3026	148.4478	← 298°	346.0	398.0	36000.0	Level	Aus ATC (ADS-B)
Sun 11:24:28 AM	-39.2989	148.4387	← 297°	346.0	398.0	36000.0	188 Climbing	Aus ATC (ADS-B)
Sun 11:24:31 AM	-39.2977	148.4356	← 298°	345.0	397.0	36025.0	Level	FlightAware ADS-B (YDPO)
Sun 11:24:33 AM	-39.2952	148.4296	← 297°	345.0	397.0	36000.0	-214 Descending	Aus ATC (ADS-B)
Sun 11:24:38 AM	-39.2916	148.4207	← 297°	345.0	397.0	36000.0	Level	Aus ATC (ADS-B)
Sun 11:24:48 AM	-39.2849	148.4042	← 297°	345.0	397.0	36000.0	Level	Aus ATC (ADS-B)
Sun 11:24:53 AM	-39.2805	148.3934	← 298°	344.0	396.0	36000.0	115 Climbing	Aus ATC (ADS-B)
Sun 11:25:01 AM	-39.2743	148.3784	← 298°	345.0	397.0	36025.0	Level	FlightAware ADS-B (MBW / YMMB)
Sun 11:25:03 AM	-39.2738	148.377	← 305°	345.0	397.0	36000.0	-41 Descending	Aus ATC (ADS-B)
Sun 11:25:38 AM	-39.2471	148.3119	← 298°	345.0	397.0	36000.0	Level	FlightAware ADS-B (YBRS)
Sun 11:26:10 AM	-39.2238	148.2552	← 299°	344.0	396.0	36000.0	Level	FlightAware ADS-B (YAFD)
Sun 11:26:13 AM	-39.2212	148.2488	← 299°	344.0	396.0	36000.0	Level	Aus ATC (ADS-B)
Sun 11:26:40 AM	-39.2008	148.1995	← 298°	343.0	395.0	36000.0	Level	FlightAware ADS-B (YGTO)
Sun 11:27:03 AM	-39.1849	148.161	← 298°	335.0	386.0	36000.0	Level	Aus ATC (ADS-B)
Sun 11:27:08 AM	-39.1806	148.1503	← 298°	332.0	382.0	36000.0	Level	Aus ATC (ADS-B)
Sun 11:27:10 AM	-39.1788	148.1462	← 299°	330.0	380.0	36000.0	Level	FlightAware ADS-B (YAFD)
Sun 11:27:18 AM	-39.1736	148.1334	← 298°	327.0	376.0	36000.0	Level	Aus ATC (ADS-B)
Sun 11:27:28 AM	-39.1667	148.1166	← 299°	324.0	373.0	36000.0	Level	Aus ATC (ADS-B)
Sun 11:27:33 AM	-39.163	148.1077	← 297°	323.0	372.0	36000.0	Level	Aus ATC (ADS-B)
Sun 11:27:40 AM	-39.1589	148.0978	← 298°	323.0	372.0	36000.0	Level	FlightAware ADS-B (BWT / YWYY)
Sun 11:28:10 AM	-39.1375	148.0459	← 298°	323.0	372.0	36000.0	Level	FlightAware ADS-B (YTDN)
Sun 11:28:40 AM	-39.1165	147.9951	← 298°	325.0	374.0	36000.0	Level	FlightAware ADS-B (YTDN)
Sun 11:29:10 AM	-39.0952	147.9442	← 298°	324.0	373.0	36000.0	Level	FlightAware ADS-B (YAFD)
Sun 11:29:40 AM	-39.0744	147.8939	← 298°	325.0	374.0	36000.0	-25 Descending	FlightAware ADS-B (YTDN)
Sun 11:30:10 AM	-39.0525	147.8414	← 298°	324.0	373.0	35975.0	-49 Descending	FlightAware ADS-B (MEL / YMML)
Sun 11:30:41 AM	-39.0306	147.7885	← 299°	324.0	373.0	35950.0	24 Climbing	FlightAware ADS-B (YAFD)
Sun 11:31:12 AM	-39.0079	147.7347	← 298°	329.0	379.0	36000.0	74 Climbing	FlightAware ADS-B (SXE / YMES)
Sun 11:31:42 AM	-38.9855	147.6811	← 298°	330.0	380.0	36025.0	Level	FlightAware ADS-B (YDPO)
Sun 11:32:12 AM	-38.9659	147.6342	← 298°	327.0	376.0	36000.0	-25 Descending	FlightAware ADS-B (MEL / YMML)
Sun 11:32:42 AM	-38.9437	147.5812	← 298°	321.0	369.0	36000.0	Level	FlightAware ADS-B (MEB / YMEN)
Sun 11:33:14 AM	-38.9225	147.5306	← 298°	321.0	369.0	36000.0	Level	FlightAware ADS-B (YBRS)
Sun 11:33:44 AM	-38.8993	147.4758	← 298°	324.0	373.0	36000.0	Level	FlightAware ADS-B (YAFD)
Sun 11:34:14 AM	-38.878	147.4254	← 298°	328.0	377.0	36000.0	Level	FlightAware ADS-B (BSJ / YBNS)
Sun 11:34:44 AM	-38.857	147.3757	← 298°	328.0	377.0	36000.0	25 Climbing	FlightAware ADS-B (YRSY)
Sun 11:35:14 AM	-38.8353	147.3243	← 298°	328.0	377.0	36025.0	64 Climbing	FlightAware ADS-B (YBRS)
Sun 11:35:31 AM	-38.823	147.2954	← 300°	326.0	375.0	36050.0	Level	FlightAware ADS-B (YAFD)
Sun 11:36:02 AM	-38.8009	147.243	← 299°	325.0	374.0	36025.0	-57 Descending	FlightAware ADS-B (YAFD)
Sun 11:36:24 AM	-38.785	147.2055	← 299°	324.0	373.0	36000.0	-58 Descending	FlightAware ADS-B (MEL / YMML)
Sun 11:36:54 AM	-38.764	147.1562	← 299°	325.0	374.0	35975.0	-31 Descending	FlightAware ADS-B (YBRS)
Sun 11:37:13 AM	-38.7492	147.1213	← 300°	324.0	373.0	35975.0	Level	FlightAware ADS-B (MBW / YMMB)
Sun 11:37:43 AM	-38.7276	147.0709	← 300°	324.0	373.0	35975.0	Level	FlightAware ADS-B (MBW / YMMB)
Sun 11:38:12 AM	-38.7073	147.0232	← 300°	324.0	373.0	35975.0	Level	FlightAware ADS-B (YAFD)
Sun 11:38:31 AM	-38.6937	146.9915	← 300°	322.0	371.0	35975.0	-34 Descending	FlightAware ADS-B (YAFD)
Sun 11:38:56 AM	-38.6761	146.9505	← 300°	322.0	371.0	35950.0	-31 Descending	FlightAware ADS-B (MEL / YMML)
Sun 11:39:19 AM	-38.6595	146.9117	← 300°	322.0	371.0	35950.0	Level	FlightAware ADS-B (YGTO)
Sun 11:39:37 AM	-38.6456	146.8792	← 299°	324.0	373.0	35950.0	32 Climbing	FlightAware ADS-B (YGTO)
Sun 11:40:06 AM	-38.626	146.8338	← 299°	326.0	375.0	35975.0	59 Climbing	FlightAware ADS-B (YAFD)
Sun 11:40:28 AM	-38.6093	146.7951	← 299°	328.0	377.0	36000.0	73 Climbing	FlightAware ADS-B (MBW / YMMB)
Sun 11:40:47 AM	-38.5954	146.7626	← 300°	328.0	377.0	36025.0	31 Climbing	FlightAware ADS-B (MEL / YMML)
Sun 11:41:17 AM	-38.5735	146.7119	← 300°	328.0	377.0	36025.0	Level	FlightAware ADS-B (MEL / YMML)
Sun 11:41:47 AM	-38.5513	146.6608	← 299°	330.0	380.0	36025.0	-25 Descending	FlightAware ADS-B (LST / YMLT)
Sun 11:42:16 AM	-38.5301	146.6118	← 300°	330.0	380.0	36000.0	-25 Descending	FlightAware ADS-B (YAFD)
Sun 11:42:46 AM	-38.508	146.5606	← 300°	331.0	381.0	36000.0	Level	FlightAware ADS-B (YAFD)
Sun 11:43:16 AM	-38.4861	146.5103	← 299°	332.0	382.0	36000.0	-20 Descending	FlightAware ADS-B (YMPC)
Sun 11:44:01 AM	-38.452	146.4318	← 299°	330.0	380.0	35975.0	-243 Descending	FlightAware ADS-B (YTDN)
Sun 11:44:30 AM	-38.4311	146.384	← 299°	327.0	376.0	35700.0	-1,147 Descending	FlightAware ADS-B (YDPO)
Sun 11:44:52 AM	-38.4153	146.3476	← 300°	323.0	372.0	35000.0	-1,684 Descending	FlightAware ADS-B (YAFD)
Sun 11:45:19 AM	-38.3967	146.305	← 299°	317.0	365.0	34325.0	-1,755 Descending	FlightAware ADS-B (ARY / YARA)
Sun 11:45:39 AM	-38.3841	146.2764	← 299°	315.0	362.0	33625.0	-2,430 Descending	FlightAware ADS-B (ARY / YARA)
Sun 11:46:09 AM	-38.3601	146.2217	← 299°	318.0	366.0	32299.999999999996	-2,381 Descending	FlightAware ADS-B (YAFD)
Sun 11:46:42 AM	-38.3364	146.1677	← 299°	323.0	372.0	31125.0	-2,068 Descending	FlightAware ADS-B (YAFD)
Sun 11:47:23 AM	-38.3062	146.0986	← 299°	326.0	375.0	29750.0	-1,965 Descending	FlightAware ADS-B (YTDN)
Sun 11:47:53 AM	-38.2844	146.0493	← 299°	329.0	379.0	28800.0	-1,925 Descending	FlightAware ADS-B (MEL / YMML)
Sun 11:48:23 AM	-38.2618	145.9981	← 299°	336.0	387.0	27825.0	-1,981 Descending	FlightAware ADS-B (YTDN)
Sun 11:48:46 AM	-38.2441	145.9582	← 299°	342.0	394.0	27050.0	-2,077 Descending	FlightAware ADS-B
Sun 11:49:02 AM	-38.2314	145.9293	← 299°	344.0	396.0	26475.0	-2,000 Descending	FlightAware ADS-B (YLEG)
Sun 11:49:25 AM	-38.2149	145.8908	← 296°	343.0	395.0	25750.0	-1,826 Descending	FlightAware ADS-B (YMPC)
Sun 11:49:48 AM	-38.1999	145.8472	← 294°	341.0	392.0	25075.0	-1,840 Descending	FlightAware ADS-B (MEL / YMML)
Sun 11:50:18 AM	-38.1811	145.7914	← 293°	341.0	392.0	24125.0	-1,791 Descending	FlightAware ADS-B (MBW / YMMB)
Sun 11:50:55 AM	-38.1585	145.7252	← 293°	335.0	386.0	23075.0	-1,679 Descending	FlightAware ADS-B (MBW / YMMB)
Sun 11:51:25 AM	-38.1405	145.6726	← 293°	330.0	380.0	22250.0	-1,700 Descending	FlightAware ADS-B (MBW / YMMB)
Sun 11:51:55 AM	-38.1211	145.6159	← 293°	330.0	380.0	21375.0	-1,688 Descending	FlightAware ADS-B (BWT / YWYY)
Sun 11:52:13 AM	-38.1114	145.5875	← 293°	328.0	377.0	20900.0	-1,656 Descending	FlightAware ADS-B (MEB / YMEN)
Sun 11:52:43 AM	-38.093	145.5338	← 294°	324.0	373.0	20050.0	-1,619 Descending	FlightAware ADS-B (MEB / YMEN)
Sun 11:53:16 AM	-38.0736	145.4773	← 294°	318.0	366.0	19200.0	-1,413 Descending	FlightAware ADS-B (YMPC)
Sun 11:53:35 AM	-38.0623	145.4443	← 295°	312.0	359.0	18825.0	-1,447 Descending	FlightAware ADS-B
Sun 11:54:13 AM	-38.0409	145.3819	← 294°	306.0	352.0	17825.0	-1,553 Descending	FlightAware ADS-B (YRSY)
Sun 11:54:32 AM	-38.0298	145.3498	← 295°	303.0	349.0	17350.0	-1,618 Descending	FlightAware ADS-B (YAFD)
Sun 11:54:51 AM	-38.0183	145.3197	← 303°	303.0	349.0	16800.0	-1,800 Descending	FlightAware ADS-B (MBW / YMMB)
Sun 11:55:07 AM	-38.0012	145.2998	↖ 328°	312.0	359.0	16300.0	-1,900 Descending	FlightAware ADS-B (YBSS)
Sun 11:55:36 AM	-37.9652	145.2747	↖ 332°	315.0	362.0	15375.0	-1,818 Descending	FlightAware ADS-B
Sun 11:55:40 AM	-37.9594	145.2707	↖ 330°	315.0	362.0	15300.0	-1,167 Descending	Aus ATC (ADS-B)
Sun 11:55:45 AM	-37.9529	145.2663	↖ 330°	314.0	361.0	15200.0	-1,800 Descending	Aus ATC (ADS-B)
Sun 11:55:50 AM	-37.9478	145.2628	↖ 334°	314.0	361.0	15000.0	-1,600 Descending	Aus ATC (ADS-B)
Sun 11:56:00 AM	-37.9337	145.2531	↖ 331°	313.0	360.0	14800.0	-1,200 Descending	Aus ATC (ADS-B)
Sun 11:56:05 AM	-37.9273	145.2487	↖ 332°	312.0	359.0	14700.0	-1,600 Descending	Aus ATC (ADS-B)
Sun 11:56:15 AM	-37.9147	145.2401	↖ 331°	312.0	359.0	14400.0	-1,615 Descending	Aus ATC (ADS-B)
Sun 11:56:44 AM	-37.8791	145.2154	↖ 332°	307.0	353.0	13650.0	-1,543 Descending	FlightAware ADS-B (MBW / YMMB)
Sun 11:56:50 AM	-37.8709	145.2096	↖ 332°	308.0	354.0	13500.0	-1,364 Descending	Aus ATC (ADS-B)
Sun 11:56:55 AM	-37.8647	145.2053	↖ 329°	308.0	354.0	13400.0	-1,558 Descending	Aus ATC (ADS-B)
Sun 11:57:16 AM	-37.8389	145.1873	↖ 332°	304.0	350.0	12825.0	-1,602 Descending	FlightAware ADS-B
Sun 11:57:39 AM	-37.8106	145.168	↖ 333°	301.0	346.0	12225.0	-1,632 Descending	FlightAware ADS-B (MEL / YMML)
Sun 11:57:50 AM	-37.7968	145.1589	↖ 332°	301.0	346.0	11900.0	-1,500 Descending	Aus ATC (ADS-B)
Sun 11:58:00 AM	-37.7844	145.1507	↖ 332°	300.0	345.0	11700.0	-1,500 Descending	Aus ATC (ADS-B)
Sun 11:58:09 AM	-37.7733	145.1434	↖ 333°	298.0	343.0	11425.0	-1,600 Descending	FlightAware ADS-B
Sun 11:58:15 AM	-37.7661	145.1387	↖ 335°	298.0	343.0	11300.0	-1,594 Descending	Aus ATC (ADS-B)
Sun 11:58:25 AM	-37.7539	145.1307	↖ 332°	297.0	342.0	11000.0	-1,600 Descending	Aus ATC (ADS-B)
Sun 11:58:30 AM	-37.749	145.1275	↖ 330°	297.0	342.0	10900.0	-1,200 Descending	Aus ATC (ADS-B)
Sun 11:58:35 AM	-37.7417	145.1227	↖ 330°	297.0	342.0	10800.0	-1,667 Descending	Aus ATC (ADS-B)
Sun 11:58:39 AM	-37.7374	145.1197	↖ 332°	297.0	342.0	10650.0	-2,400 Descending	FlightAware ADS-B (MBW / YMMB)
Sun 11:58:40 AM	-37.7359	145.1187	↖ 326°	297.0	342.0	10600.0	-1,560 Descending	Aus ATC (ADS-B)
Sun 11:59:04 AM	-37.7061	145.0992	↖ 333°	294.0	338.0	10000.0	-1,500 Descending	FlightAware ADS-B (YRID)
Sun 11:59:20 AM	-37.6871	145.0879	↖ 335°	293.0	337.0	9600.0	-1,429 Descending	Aus ATC (ADS-B)
Sun 11:59:25 AM	-37.6809	145.0843	↖ 335°	294.0	338.0	9500.0	-1,650 Descending	Aus ATC (ADS-B)
Sun 11:59:30 AM	-37.6753	145.0812	↖ 336°	294.0	338.0	9325.0	-1,800 Descending	FlightAware ADS-B (YHBH)
Sun 11:59:35 AM	-37.6685	145.0773	↖ 337°	293.0	337.0	9200.0	-1,350 Descending	Aus ATC (ADS-B)
Sun 11:59:40 AM	-37.6623	145.0738	↖ 338°	294.0	338.0	9100.0	-1,600 Descending	Aus ATC (ADS-B)
Sun 11:59:50 AM	-37.6502	145.067	↖ 335°	292.0	336.0	8800.0	-1,773 Descending	Aus ATC (ADS-B)
Sun 11:59:51 AM	-37.6481	145.0658	↖ 336°	292.0	336.0	8775.0	-1,200 Descending	FlightAware ADS-B (YTGG)
Sun 12:00:00 PM	-37.6377	145.0598	↖ 335°	290.0	334.0	8600.0	-1,438 Descending	Aus ATC (ADS-B)
Sun 12:00:15 PM	-37.6195	145.0494	↖ 335°	288.0	331.0	8200.0	-1,440 Descending	Aus ATC (ADS-B)
Sun 12:00:25 PM	-37.6075	145.0424	↖ 336°	287.0	330.0	8000.0	-1,600 Descending	Aus ATC (ADS-B)
Sun 12:00:30 PM	-37.6014	145.0388	↖ 338°	286.0	329.0	7800.0	-1,800 Descending	Aus ATC (ADS-B)
Sun 12:00:35 PM	-37.5962	145.0357	↖ 335°	285.0	328.0	7700.0	-1,200 Descending	FlightAware ADS-B (MBW / YMMB)
Sun 12:00:40 PM	-37.5895	145.0318	↖ 333°	283.0	326.0	7600.0	-1,200 Descending	Aus ATC (ADS-B)
Sun 12:00:50 PM	-37.5776	145.0248	↖ 334°	281.0	323.0	7400.0	-1,200 Descending	Aus ATC (ADS-B)
Sun 12:00:55 PM	-37.5719	145.0215	↖ 334°	279.0	321.0	7300.0	-1,800 Descending	Aus ATC (ADS-B)
Sun 12:01:00 PM	-37.566	145.018	↖ 338°	278.0	320.0	7100.0	-2,063 Descending	Aus ATC (ADS-B)
Sun 12:01:03 PM	-37.562	145.0157	↖ 335°	277.0	319.0	7025.0	-1,200 Descending	FlightAware ADS-B
Sun 12:01:10 PM	-37.5543	145.0112	↖ 334°	277.0	319.0	6900.0	-1,500 Descending	Aus ATC (ADS-B)
Sun 12:01:33 PM	-37.5274	144.9954	↖ 335°	274.0	315.0	6275.0	-1,200 Descending	FlightAware ADS-B (YLIL)
Sun 12:01:50 PM	-37.5101	144.985	↖ 335°	264.0	304.0	6100.0	-750 Descending	Aus ATC (ADS-B)
Sun 12:01:53 PM	-37.5048	144.9818	↖ 334°	261.0	300.0	6025.0	-786 Descending	FlightAware ADS-B (MBW / YMMB)
Sun 12:02:11 PM	-37.4865	144.9706	↖ 334°	252.0	290.0	5825.0	-614 Descending	FlightAware ADS-B
Sun 12:02:37 PM	-37.461	144.9551	↖ 334°	238.0	274.0	5575.0	-679 Descending	FlightAware ADS-B (YMPC)
Sun 12:02:53 PM	-37.4481	144.9414	← 303°	228.0	262.0	5350.0	-838 Descending	FlightAware ADS-B (MBW / YMMB)
Sun 12:03:11 PM	-37.4449	144.9174	← 262°	218.0	251.0	5100.0	-1,065 Descending	FlightAware ADS-B
Sun 12:03:24 PM	-37.4478	144.9004	← 258°	223.0	257.0	4800.0	-1,565 Descending	Aus ATC (ADS-B)
Sun 12:03:34 PM	-37.4495	144.8887	← 259°	225.0	259.0	4500.0	-1,500 Descending	Aus ATC (ADS-B)
Sun 12:03:35 PM	-37.4497	144.8866	← 261°	225.0	259.0	4525.0	Level	FlightAware ADS-B (YHBH)
Sun 12:03:44 PM	-37.4513	144.8746	← 261°	221.0	254.0	4500.0	-536 Descending	Aus ATC (ADS-B)
Sun 12:03:49 PM	-37.4521	144.8684	← 261°	218.0	251.0	4400.0	-800 Descending	Aus ATC (ADS-B)
Sun 12:03:59 PM	-37.4538	144.856	← 260°	214.0	246.0	4300.0	-800 Descending	Aus ATC (ADS-B)
Sun 12:04:04 PM	-37.4546	144.8501	← 260°	212.0	244.0	4200.0	-1,200 Descending	Aus ATC (ADS-B)
Sun 12:04:09 PM	-37.4556	144.8439	← 259°	212.0	244.0	4100.0	-600 Descending	Aus ATC (ADS-B)
Sun 12:04:14 PM	-37.4564	144.8379	← 261°	211.0	243.0	4100.0	-750 Descending	Aus ATC (ADS-B)
Sun 12:04:17 PM	-37.4569	144.8341	← 260°	210.0	242.0	4000.0	-1,200 Descending	FlightAware ADS-B (YRID)
Sun 12:04:19 PM	-37.4573	144.8318	← 260°	210.0	242.0	4000.0	Level	Aus ATC (ADS-B)
Sun 12:04:29 PM	-37.459	144.8213	← 259°	205.0	236.0	4000.0	Level	Aus ATC (ADS-B)
Sun 12:04:34 PM	-37.4612	144.8149	↙ 245°	201.0	231.0	4000.0	-400 Descending	Aus ATC (ADS-B)
Sun 12:04:44 PM	-37.4681	144.8072	↙ 222°	199.0	229.0	3900.0	-583 Descending	Aus ATC (ADS-B)
Sun 12:04:52 PM	-37.475	144.8045	↓ 191°	197.0	227.0	3825.0	-857 Descending	FlightAware ADS-B (YMPC)
Sun 12:05:19 PM	-37.499	144.8065	↓ 175°	192.0	221.0	3400.0	-984 Descending	Aus ATC (ADS-B)
Sun 12:05:24 PM	-37.5036	144.8072	↓ 168°	193.0	222.0	3300.0	-800 Descending	Aus ATC (ADS-B)
Sun 12:05:34 PM	-37.5123	144.8088	↓ 171°	192.0	221.0	3200.0	-900 Descending	Aus ATC (ADS-B)
Sun 12:05:44 PM	-37.5212	144.8104	↓ 173°	191.0	220.0	3000.0	-1,200 Descending	Aus ATC (ADS-B)
Sun 12:05:49 PM	-37.5245	144.811	↓ 167°	191.0	220.0	2900.0	-1,929 Descending	Aus ATC (ADS-B)
Sun 12:05:51 PM	-37.5278	144.8116	↓ 172°	191.0	220.0	2775.0	-1,200 Descending	FlightAware ADS-B (YRID)
Sun 12:06:04 PM	-37.5383	144.8135	↓ 173°	183.0	211.0	2600.0	-917 Descending	Aus ATC (ADS-B)
Sun 12:06:09 PM	-37.5425	144.8142	↓ 177°	177.0	204.0	2500.0	-800 Descending	Aus ATC (ADS-B)
Sun 12:06:19 PM	-37.5503	144.8157	↓ 170°	169.0	194.0	2400.0	-875 Descending	Aus ATC (ADS-B)
Sun 12:06:21 PM	-37.5526	144.8162	↓ 172°	166.0	191.0	2325.0	-800 Descending	FlightAware ADS-B (MEL / YMML)
Sun 12:06:34 PM	-37.5614	144.8177	↓ 171°	158.0	182.0	2200.0	-726 Descending	Aus ATC (ADS-B)
Sun 12:06:52 PM	-37.5737	144.8201	↓ 172°	144.0	166.0	1950.0	-686 Descending	FlightAware ADS-B (MBW / YMMB)
Sun 12:07:09 PM	-37.5842	144.822	↓ 171°	131.0	151.0	1800.0	-778 Descending	Aus ATC (ADS-B)
Sun 12:07:19 PM	-37.5901	144.8232	↓ 171°	129.0	148.0	1600.0	-1,071 Descending	Aus ATC (ADS-B)
Sun 12:07:23 PM	-37.5925	144.8236	↓ 171°	127.0	146.0	1550.0	Level	FlightAware ADS-B (YHBH)
Sun 12:07:24 PM	-37.593	144.8236	↙ 209°	127.0	146.0	1600.0	-563 Descending	Aus ATC (ADS-B)
Sun 12:07:39 PM	-37.6018	144.8253	↓ 173°	125.0	144.0	1400.0	-882 Descending	Aus ATC (ADS-B)
Sun 12:07:41 PM	-37.6035	144.8256	↓ 172°	125.0	144.0	1350.0	-1,200 Descending	FlightAware ADS-B (MEL / YMML)
Sun 12:07:44 PM	-37.6045	144.8258	↓ 188°	125.0	144.0	1300.0	-375 Descending	Aus ATC (ADS-B)
Sun 12:07:49 PM	-37.6076	144.8263	↓ 175°	125.0	144.0	1300.0	Level	Aus ATC (ADS-B)
Sun 12:07:54 PM	-37.6102	144.8268	↓ 166°	125.0	144.0	1300.0	-750 Descending	Aus ATC (ADS-B)
Sun 12:07:57 PM	-37.6124	144.8273	↓ 172°	125.0	144.0	1200.0	-600 Descending	FlightAware ADS-B (MEL / YMML)
Sun 12:08:04 PM	-37.6161	144.828	↓ 168°	125.0	144.0	1200.0	-500 Descending	Aus ATC (ADS-B)
Sun 12:08:09 PM	-37.6189	144.8285	↓ 172°	125.0	144.0	1100.0	-1,167 Descending	Aus ATC (ADS-B)
Sun 12:08:13 PM	-37.6213	144.829	↓ 172°	125.0	144.0	1025.0	-600 Descending	FlightAware ADS-B (YMPC)
Sun 12:08:19 PM	-37.6246	144.8295	↓ 173°	125.0	144.0	1000.0	-469 Descending	Aus ATC (ADS-B)
Sun 12:08:29 PM	-37.6298	144.8305	↓ 176°	125.0	144.0	900.0	-600 Descending	Aus ATC (ADS-B)
