# Supplementary material for: TrackMatcher – a tool for finding intercepts in tracks of geographical positions
Source: Copernicus journal article supplement (doi:10.5194/gmd-15-7557-2022), 2022-10-18
Supplement: Supplementary file 1 [file gmd-15-7557-2022-supplement.zip › ESM/example/data/flights/MAU843_27-JAN-2019_FIMP-FACT.dat]

Time (CET)	Latitude	Longitude	Course	kts	mph	feet	Rate	Reporting Facility
Sun 01:40:18 PM	-20.7748	57.6634	← 246°	242.0	278.0	8950.0	Level	FlightAware MLAT (7 sites)
Sun 01:40:34 PM	-20.7885	57.6476	↙ 237°	252.0	290.0	9550.0	2,588 Climbing	FlightAware MLAT (7 sites)
Sun 01:40:58 PM	-20.8148	57.6176	↙ 237°	300.0	345.0	10675.0	2,125 Climbing	FlightAware MLAT (6 sites)
Sun 01:41:22 PM	-20.8242	57.5836	← 250°	292.0	336.0	11250.0	1,733 Climbing	FlightAware MLAT (8 sites)
Sun 01:41:56 PM	-20.8359	57.5339	← 255°	305.0	351.0	12350.0	2,331 Climbing	FlightAware MLAT (7 sites)
Sun 01:42:27 PM	-20.8445	57.4871	← 258°	308.0	354.0	13775.0	2,153 Climbing	FlightAware MLAT (7 sites)
Sun 01:42:58 PM	-20.8553	57.4415	← 256°	302.0	348.0	14575.0	1,569 Climbing	FlightAware MLAT (8 sites)
Sun 01:43:32 PM	-20.8695	57.3927	← 254°	311.0	358.0	15475.0	1,681 Climbing	FlightAware MLAT (5 sites)
Sun 01:43:56 PM	-20.8879	57.36	↙ 240°	312.0	359.0	16200.0	2,122 Climbing	FlightAware MLAT (6 sites)
Sun 01:44:13 PM	-20.9106	57.3451	↙ 223°	313.0	360.0	16925.0	1,575 Climbing	FlightAware MLAT (7 sites)
Sun 01:44:56 PM	-20.971	57.3116	↙ 210°	337.0	388.0	17775.0	1,520 Climbing	FlightAware MLAT (7 sites)
Sun 01:45:27 PM	-21.0128	57.2837	↙ 212°	343.0	395.0	18800.0	1,697 Climbing	FlightAware MLAT (7 sites)
Sun 01:45:57 PM	-21.052	57.2554	↙ 214°	343.0	395.0	19500.0	1,230 Climbing	FlightAware MLAT (7 sites)
Sun 01:46:28 PM	-21.087	57.2152	↙ 222°	358.0	412.0	20050.0	851 Climbing	FlightAware MLAT (4 sites)
Sun 01:47:04 PM	-21.091	57.1448	← 270°	443.0	510.0	20450.0	779 Climbing	FlightAware MLAT (8 sites)
Sun 01:47:20 PM	-21.1026	57.1178	← 253°	384.0	442.0	20725.0	1,033 Climbing	FlightAware MLAT (6 sites)
Sun 01:48:05 PM	-21.1358	57.0382	← 247°	399.0	459.0	21500.0	1,007 Climbing	FlightAware MLAT (8 sites)
Sun 01:48:36 PM	-21.1565	56.9811	← 248°	399.0	459.0	22000.0	968 Climbing	FlightAware MLAT (4 sites)
Sun 01:49:07 PM	-21.1781	56.9212	← 249°	422.0	486.0	22500.0	1,008 Climbing	FlightAware MLAT (6 sites)
Sun 01:49:40 PM	-21.1983	56.8558	← 251°	423.0	487.0	23075.0	1,143 Climbing	FlightAware MLAT (5 sites)
Sun 01:50:10 PM	-21.2193	56.7961	← 250°	424.0	488.0	23700.0	1,300 Climbing	FlightAware MLAT (6 sites)
Sun 01:50:40 PM	-21.2415	56.7367	← 249°	424.0	488.0	24375.0	1,210 Climbing	FlightAware MLAT (6 sites)
Sun 01:51:12 PM	-21.2647	56.6729	← 249°	419.0	482.0	24950.0	1,262 Climbing	FlightAware MLAT (6 sites)
Sun 01:51:43 PM	-21.2861	56.6099	← 250°	446.0	513.0	25700.0	1,381 Climbing	FlightAware MLAT (5 sites)
Sun 01:52:15 PM	-21.3088	56.5461	← 249°	428.0	493.0	26400.0	1,161 Climbing	FlightAware MLAT (6 sites)
Sun 01:52:45 PM	-21.3309	56.4852	← 249°	452.0	520.0	26900.0	900 Climbing	FlightAware MLAT (8 sites)
Sun 01:53:15 PM	-21.3519	56.4245	← 250°	443.0	510.0	27300.0	798 Climbing	FlightAware MLAT (8 sites)
Sun 01:53:47 PM	-21.3755	56.3591	← 249°	439.0	505.0	27725.0	783 Climbing	FlightAware MLAT (7 sites)
Sun 01:54:24 PM	-21.4056	56.2824	← 250°	482.0	555.0	28200.0	1,217 Climbing	FlightAware MLAT (8 sites)
Sun 01:54:56 PM	-21.4242	56.2144	← 251°	438.0	504.0	29125.0	1,738 Climbing	FlightAware MLAT (7 sites)
Sun 01:55:27 PM	-21.4451	56.1514	← 250°	431.0	496.0	30025.0	1,429 Climbing	FlightAware MLAT (6 sites)
Sun 01:55:59 PM	-21.4667	56.0865	← 251°	438.0	504.0	30625.0	952 Climbing	FlightAware MLAT (6 sites)
Sun 01:56:30 PM	-21.4912	56.0235	← 248°	431.0	496.0	31025.0	810 Climbing	FlightAware MLAT (6 sites)
Sun 01:57:02 PM	-21.516	55.9578	← 248°	444.0	511.0	31475.0	649 Climbing	FlightAware MLAT (5 sites)
Sun 01:57:37 PM	-21.5449	55.8812	← 248°	457.0	526.0	31750.0	411 Climbing	FlightAware MLAT (4 sites)
Sun 01:58:15 PM	-21.5675	55.8036	← 253°	457.0	526.0	31975.0	325 Climbing	FlightAware MLAT (4 sites)
Sun 01:59:00 PM	-21.6013	55.7046	← 252°	466.0	536.0	32200.000000000004	480 Climbing	FlightAware MLAT (4 sites)
Sun 01:59:30 PM	-21.6237	55.641	← 248°	448.0	516.0	32575.000000000004	1,082 Climbing	FlightAware MLAT (4 sites)
Sun 02:00:01 PM	-21.6449	55.5739	← 252°	476.0	548.0	33300.0	1,451 Climbing	FlightAware MLAT (6 sites)
Sun 02:00:31 PM	-21.6709	55.5068	← 249°	468.0	539.0	34050.0	1,331 Climbing	FlightAware MLAT (7 sites)
Sun 02:01:03 PM	-21.6998	55.4363	← 247°	478.0	550.0	34675.0	1,185 Climbing	FlightAware MLAT (6 sites)
Sun 02:01:33 PM	-21.7231	55.3713	← 249°	474.0	545.0	35275.0	1,177 Climbing	FlightAware MLAT (8 sites)
Sun 02:02:08 PM	-21.7506	55.2954	← 248°	470.0	541.0	35950.0	1,062 Climbing	FlightAware MLAT (6 sites)
Sun 02:02:38 PM	-21.7734	55.2328	← 248°	456.0	525.0	36425.0	800 Climbing	FlightAware MLAT (5 sites)
Sun 02:03:08 PM	-21.7943	55.17	← 250°	456.0	525.0	36750.0	633 Climbing	FlightAware MLAT (7 sites)
Sun 02:03:42 PM	-21.8192	55.0973	← 249°	455.0	524.0	37100.0	649 Climbing	FlightAware MLAT (5 sites)
Sun 02:04:15 PM	-21.843	55.0277	← 250°	455.0	524.0	37475.0	750 Climbing	FlightAware MLAT (5 sites)
Sun 02:04:46 PM	-21.8628	54.9647	← 250°	444.0	511.0	37900.0	516 Climbing	FlightAware MLAT (5 sites)
Sun 02:05:16 PM	-21.8823	54.9032	← 251°	439.0	505.0	38000.0	100 Climbing	FlightAware MLAT (4 sites)
Sun 02:05:46 PM	-21.9032	54.8411	← 250°	441.0	507.0	38000.0	Level	FlightAware MLAT (4 sites)
Sun 02:06:20 PM	-21.9258	54.7687	← 252°	457.0	526.0	38000.0	Level	FlightAware MLAT (4 sites)
Sun 02:06:51 PM	-21.9591	54.6932	← 247°	508.0	585.0	38000.0	Level	FlightAware MLAT (4 sites)
Sun 02:07:21 PM	-21.9807	54.6266	← 251°	490.0	564.0	38000.0	Level	FlightAware MLAT (4 sites)
Sun 02:08:42 PM	-22.0168	54.4756	← 261°	311.0	358.0	38000.0	Level	FlightAware MLAT (4 sites)
Sun 05:11:16 PM	-29.7273	31.9655	← 250°	432.0	497.0	38000.0	Level	FlightAware MLAT (7 sites)
Sun 05:11:48 PM	-29.7493	31.8934	← 251°	449.0	517.0	38000.0	Level	FlightAware MLAT (6 sites)
Sun 05:12:22 PM	-29.7708	31.813	← 252°	456.0	525.0	38000.0	Level	FlightAware MLAT (6 sites)
Sun 05:12:55 PM	-29.7943	31.7409	← 251°	443.0	510.0	38000.0	Level	FlightAware MLAT (7 sites)
Sun 05:13:27 PM	-29.8182	31.6721	← 251°	436.0	502.0	38000.0	Level	FlightAware MLAT (8 sites)
Sun 05:13:57 PM	-29.8388	31.6056	← 249°	442.0	509.0	38000.0	Level	FlightAware MLAT (9 sites)
Sun 05:14:27 PM	-29.8607	31.5402	← 250°	432.0	497.0	38000.0	Level	FlightAware MLAT (7 sites)
Sun 05:14:57 PM	-29.883	31.4716	← 249°	449.0	517.0	38000.0	Level	FlightAware MLAT (9 sites)
Sun 05:15:29 PM	-29.9065	31.403	← 249°	438.0	504.0	38000.0	Level	FlightAware MLAT (8 sites)
Sun 05:16:04 PM	-29.9301	31.325	← 251°	441.0	507.0	38000.0	Level	FlightAware MLAT (5 sites)
Sun 05:16:37 PM	-29.9562	31.2532	← 249°	446.0	513.0	38000.0	Level	FlightAware MLAT (6 sites)
Sun 05:17:07 PM	-29.9721	31.1851	← 254°	435.0	501.0	38000.0	Level	FlightAware MLAT (7 sites)
Sun 05:17:56 PM	-30.012	31.0789	← 248°	448.0	516.0	38000.0	Level	FlightAware MLAT (7 sites)
Sun 05:18:27 PM	-30.0331	31.0109	← 249°	438.0	504.0	38000.0	Level	FlightAware MLAT (9 sites)
Sun 05:18:58 PM	-30.0544	30.9414	← 250°	439.0	505.0	38000.0	Level	FlightAware MLAT (9 sites)
Sun 05:19:28 PM	-30.081	30.8759	← 247°	458.0	527.0	38000.0	Level	FlightAware MLAT (8 sites)
Sun 05:19:59 PM	-30.1029	30.8048	← 250°	454.0	522.0	38000.0	Level	FlightAware MLAT (7 sites)
Sun 05:20:29 PM	-30.1175	30.7377	← 253°	437.0	503.0	38000.0	Level	FlightAware MLAT (10 sites)
Sun 05:21:00 PM	-30.1385	30.6686	← 252°	442.0	509.0	38000.0	Level	FlightAware MLAT (8 sites)
Sun 05:21:36 PM	-30.1622	30.5883	← 251°	435.0	501.0	38000.0	Level	FlightAware MLAT (12 sites)
Sun 05:22:08 PM	-30.1849	30.5164	← 250°	440.0	506.0	38000.0	Level	FlightAware MLAT (5 sites)
Sun 05:22:33 PM	-30.1985	30.4609	← 253°	438.0	504.0	38000.0	Level	FlightAware MLAT (9 sites)
Sun 05:23:06 PM	-30.2204	30.3875	← 251°	433.0	498.0	38000.0	Level	FlightAware MLAT (10 sites)
Sun 05:23:36 PM	-30.2427	30.3208	← 250°	439.0	505.0	38000.0	Level	FlightAware MLAT (9 sites)
Sun 05:24:06 PM	-30.2644	30.2526	← 250°	454.0	522.0	38000.0	Level	FlightAware MLAT (6 sites)
Sun 05:24:38 PM	-30.2863	30.1811	← 250°	445.0	512.0	38000.0	Level	FlightAware MLAT (7 sites)
Sun 05:25:09 PM	-30.3072	30.1131	← 250°	442.0	509.0	38000.0	Level	FlightAware MLAT (6 sites)
Sun 05:25:39 PM	-30.328	30.0442	← 251°	450.0	518.0	38000.0	Level	FlightAware MLAT (7 sites)
Sun 05:26:16 PM	-30.3533	29.9607	← 251°	448.0	516.0	38000.0	Level	FlightAware MLAT (7 sites)
Sun 05:26:50 PM	-30.3807	29.8809	← 250°	458.0	527.0	38000.0	3 Climbing	FlightAware MLAT (7 sites)
Sun 05:27:20 PM	-30.4006	29.8137	← 251°	451.0	519.0	38003.0	4 Climbing	FlightAware MLAT (6 sites)
Sun 05:27:51 PM	-30.4194	29.747	← 251°	440.0	506.0	38004.0	15 Climbing	FlightAware MLAT (6 sites)
Sun 05:28:22 PM	-30.438	29.6805	← 251°	433.0	498.0	38019.0	56 Climbing	FlightAware MLAT (6 sites)
Sun 05:28:54 PM	-30.4578	29.6122	← 251°	430.0	495.0	38063.0	107 Climbing	FlightAware MLAT (6 sites)
Sun 05:29:29 PM	-30.4793	29.536	← 252°	434.0	499.0	38138.0	79 Climbing	FlightAware MLAT (6 sites)
Sun 05:30:06 PM	-30.5029	29.4547	← 252°	433.0	498.0	38158.0	22 Climbing	FlightAware MLAT (6 sites)
Sun 05:30:47 PM	-30.5298	29.3649	← 251°	432.0	497.0	38166.0	-6 Descending	FlightAware MLAT (6 sites)
Sun 05:57:29 PM	-31.7827	25.8655	↙ 244°	410.0	472.0	38000.0	Level	FlightAware MLAT (5 sites)
Sun 05:57:59 PM	-31.8055	25.8009	← 247°	429.0	494.0	38000.0	Level	FlightAware MLAT (7 sites)
Sun 05:58:33 PM	-31.8299	25.7258	← 248°	422.0	486.0	38000.0	Level	FlightAware MLAT (6 sites)
Sun 05:59:04 PM	-31.8557	25.6579	← 247°	443.0	510.0	38000.0	Level	FlightAware MLAT (7 sites)
Sun 05:59:35 PM	-31.8789	25.5915	← 247°	435.0	501.0	38000.0	Level	FlightAware MLAT (5 sites)
Sun 06:00:08 PM	-31.9051	25.521	← 247°	422.0	486.0	38000.0	Level	FlightAware MLAT (4 sites)
Sun 06:00:38 PM	-31.9281	25.4543	← 248°	445.0	512.0	38000.0	Level	FlightAware MLAT (6 sites)
Sun 06:01:17 PM	-31.959	25.3708	← 247°	424.0	488.0	38000.0	Level	FlightAware MLAT (5 sites)
Sun 06:01:48 PM	-31.9864	25.3015	↙ 245°	455.0	524.0	38000.0	2 Climbing	FlightAware MLAT (5 sites)
Sun 06:02:19 PM	-32.0069	25.2353	← 248°	428.0	493.0	38002.0	2 Climbing	FlightAware MLAT (6 sites)
Sun 06:02:49 PM	-32.0296	25.1701	← 248°	427.0	491.0	38002.0	10 Climbing	FlightAware MLAT (7 sites)
Sun 06:03:21 PM	-32.0551	25.1002	← 247°	436.0	502.0	38012.0	44 Climbing	FlightAware MLAT (6 sites)
Sun 06:03:51 PM	-32.0777	25.0345	← 248°	435.0	501.0	38047.0	-12 Descending	FlightAware MLAT (6 sites)
Sun 06:04:22 PM	-32.1009	24.9654	← 248°	436.0	502.0	38000.0	-45 Descending	FlightAware MLAT (6 sites)
Sun 06:04:53 PM	-32.1252	24.899	← 247°	434.0	499.0	38000.0	Level	FlightAware MLAT (6 sites)
Sun 06:05:24 PM	-32.1487	24.8303	← 248°	438.0	504.0	38000.0	Level	FlightAware MLAT (4 sites)
Sun 06:05:55 PM	-32.1702	24.763	← 249°	427.0	491.0	38000.0	Level	FlightAware MLAT (6 sites)
Sun 06:06:25 PM	-32.1935	24.6978	← 248°	432.0	497.0	38000.0	Level	FlightAware MLAT (6 sites)
Sun 06:06:55 PM	-32.2169	24.6337	← 247°	428.0	493.0	38000.0	Level	FlightAware MLAT (5 sites)
Sun 06:07:25 PM	-32.2415	24.5691	← 247°	429.0	494.0	38000.0	Level	FlightAware MLAT (5 sites)
Sun 06:07:55 PM	-32.265	24.5038	← 247°	431.0	496.0	38000.0	Level	FlightAware MLAT (5 sites)
Sun 06:08:28 PM	-32.2888	24.4308	← 248°	431.0	496.0	38000.0	3 Climbing	FlightAware MLAT (5 sites)
Sun 06:09:01 PM	-32.3114	24.3581	← 248°	433.0	498.0	38003.0	25 Climbing	FlightAware MLAT (4 sites)
Sun 06:09:33 PM	-32.3341	24.2868	← 249°	431.0	496.0	38027.0	60 Climbing	FlightAware MLAT (6 sites)
Sun 06:10:07 PM	-32.3576	24.2107	← 249°	438.0	504.0	38069.0	90 Climbing	FlightAware MLAT (4 sites)
Sun 06:10:38 PM	-32.3813	24.1425	← 249°	439.0	505.0	38124.0	165 Climbing	FlightAware MLAT (4 sites)
Sun 06:11:11 PM	-32.403	24.0685	← 249°	433.0	498.0	38245.0	289 Climbing	FlightAware MLAT (4 sites)
Sun 06:11:42 PM	-32.4326	24.0056	← 249°	428.0	493.0	38432.0	266 Climbing	FlightAware MLAT (4 sites)
Sun 06:12:15 PM	-32.4575	23.9337	← 248°	430.0	495.0	38529.0	309 Climbing	FlightAware MLAT (4 sites)
Sun 06:12:46 PM	-32.4808	23.8663	← 248°	429.0	494.0	38762.0	181 Climbing	FlightAware MLAT (6 sites)
Sun 06:13:21 PM	-32.5065	23.7898	← 249°	439.0	505.0	38728.0	-252 Descending	FlightAware MLAT (5 sites)
Sun 06:13:51 PM	-32.5282	23.7249	← 248°	425.0	489.0	38489.0	713 Climbing	FlightAware MLAT (7 sites)
Sun 06:14:21 PM	-32.5499	23.6592	← 249°	429.0	494.0	39441.0	-2,850 Descending	FlightAware MLAT (8 sites)
Sun 06:14:52 PM	-32.573	23.591	← 248°	424.0	488.0	35591.0	-3,913 Descending	FlightAware MLAT (6 sites)
Sun 06:15:22 PM	-32.5944	23.525	← 249°	426.0	490.0	35463.0	2,370 Climbing	FlightAware MLAT (6 sites)
Sun 06:15:53 PM	-32.6173	23.4573	← 248°	433.0	498.0	38000.0	2,495 Climbing	FlightAware MLAT (8 sites)
Sun 06:16:23 PM	-32.6394	23.3914	← 249°	438.0	504.0	38000.0	Level	FlightAware MLAT (8 sites)
Sun 06:16:55 PM	-32.6625	23.3224	← 248°	414.0	476.0	38000.0	Level	FlightAware MLAT (8 sites)
Sun 06:17:25 PM	-32.6848	23.2562	← 248°	427.0	491.0	38000.0	Level	FlightAware MLAT (8 sites)
Sun 06:17:55 PM	-32.7061	23.1913	← 248°	417.0	480.0	38000.0	Level	FlightAware MLAT (7 sites)
Sun 06:18:29 PM	-32.7308	23.116	← 249°	434.0	499.0	38000.0	Level	FlightAware MLAT (6 sites)
Sun 06:19:01 PM	-32.7542	23.045	← 249°	440.0	506.0	38000.0	Level	FlightAware MLAT (7 sites)
Sun 06:19:36 PM	-32.7775	22.9693	← 250°	420.0	483.0	38000.0	Level	FlightAware MLAT (5 sites)
Sun 06:20:07 PM	-32.8023	22.8999	← 248°	446.0	513.0	38000.0	Level	FlightAware MLAT (7 sites)
Sun 06:20:37 PM	-32.8221	22.8342	← 250°	428.0	493.0	38000.0	Level	FlightAware MLAT (7 sites)
Sun 06:21:09 PM	-32.8445	22.7645	← 249°	429.0	494.0	38000.0	Level	FlightAware MLAT (6 sites)
Sun 06:21:41 PM	-32.8691	22.695	← 248°	437.0	503.0	38000.0	Level	FlightAware MLAT (5 sites)
Sun 06:22:12 PM	-32.8925	22.627	← 248°	432.0	497.0	38000.0	Level	FlightAware MLAT (5 sites)
Sun 06:22:44 PM	-32.9147	22.5569	← 249°	421.0	484.0	38000.0	Level	FlightAware MLAT (5 sites)
Sun 06:23:17 PM	-32.9423	22.4861	← 246°	427.0	491.0	38000.0	Level	FlightAware MLAT (5 sites)
Sun 06:23:49 PM	-32.9693	22.4183	↙ 245°	428.0	493.0	38000.0	Level	FlightAware MLAT (5 sites)
Sun 06:24:54 PM	-33.0266	22.281	↙ 244°	403.0	464.0	38016.0	Level	FlightAware MLAT (4 sites)
Sun 06:25:26 PM	-33.0524	22.2137	← 246°	418.0	481.0	37949.0	-163 Descending	FlightAware MLAT (6 sites)
Sun 06:26:03 PM	-33.0832	22.1335	← 246°	430.0	495.0	37829.0	-595 Descending	FlightAware MLAT (5 sites)
Sun 06:26:33 PM	-33.1095	22.0721	↙ 244°	418.0	481.0	37285.0	2,128 Climbing	FlightAware MLAT (5 sites)
Sun 06:27:03 PM	-33.1326	22.0046	← 246°	431.0	496.0	39957.0	3,102 Climbing	FlightAware MLAT (5 sites)
Sun 06:27:36 PM	-33.1609	21.935	↙ 244°	423.0	487.0	40542.0	564 Climbing	FlightAware MLAT (5 sites)
Sun 06:28:08 PM	-33.1876	21.867	↙ 245°	426.0	490.0	40568.0	-137 Descending	FlightAware MLAT (5 sites)
Sun 06:28:38 PM	-33.2124	21.8031	↙ 245°	418.0	481.0	40400.0	-520 Descending	FlightAware MLAT (5 sites)
Sun 06:29:11 PM	-33.2398	21.7306	↙ 245°	436.0	502.0	40022.0	-2,250 Descending	FlightAware MLAT (7 sites)
Sun 06:29:42 PM	-33.2644	21.6655	↙ 245°	422.0	486.0	38000.0	-4,255 Descending	FlightAware MLAT (8 sites)
Sun 06:30:13 PM	-33.2907	21.5979	↙ 245°	430.0	495.0	35625.0	Level	FlightAware MLAT (7 sites)
Sun 06:30:46 PM	-33.3185	21.5277	↙ 245°	432.0	497.0	38000.0	2,227 Climbing	FlightAware MLAT (8 sites)
Sun 06:31:17 PM	-33.3456	21.4601	↙ 244°	435.0	501.0	38000.0	-97 Descending	FlightAware MLAT (7 sites)
Sun 06:31:48 PM	-33.3716	21.3941	↙ 244°	415.0	478.0	37900.0	-516 Descending	FlightAware MLAT (6 sites)
Sun 06:32:18 PM	-33.3957	21.3304	← 246°	424.0	488.0	37475.0	-1,008 Descending	FlightAware MLAT (6 sites)
Sun 06:32:49 PM	-33.4212	21.2635	← 246°	434.0	499.0	36875.0	-1,024 Descending	FlightAware MLAT (7 sites)
Sun 06:33:21 PM	-33.4477	21.1948	← 246°	435.0	501.0	36400.0	-891 Descending	FlightAware MLAT (6 sites)
Sun 06:34:24 PM	-33.4989	21.0592	↙ 245°	425.0	489.0	35688.0	Level	FlightAware MLAT (8 sites)
Sun 06:34:54 PM	-33.5239	20.9939	← 246°	447.0	514.0	34550.0	-1,779 Descending	FlightAware MLAT (6 sites)
Sun 06:35:26 PM	-33.5505	20.9244	↙ 245°	426.0	490.0	33850.0	-2,444 Descending	FlightAware MLAT (8 sites)
Sun 06:35:56 PM	-33.5746	20.8604	← 246°	419.0	482.0	32025.0	-3,000 Descending	FlightAware MLAT (9 sites)
Sun 06:36:30 PM	-33.6024	20.7872	← 246°	421.0	484.0	30650.0	-1,289 Descending	FlightAware MLAT (9 sites)
Sun 06:37:00 PM	-33.6261	20.725	↙ 245°	401.0	461.0	30650.0	5 Climbing	FlightAware MLAT (9 sites)
Sun 06:37:31 PM	-33.6507	20.6608	↙ 245°	419.0	482.0	30655.0	-2,063 Descending	FlightAware MLAT (7 sites)
Sun 06:38:04 PM	-33.6756	20.5934	← 246°	405.0	466.0	28450.0	-3,777 Descending	FlightAware MLAT (7 sites)
Sun 06:38:37 PM	-33.7013	20.5262	← 246°	393.0	452.0	26500.0	-2,023 Descending	FlightAware MLAT (8 sites)
Sun 06:39:10 PM	-33.7259	20.4595	← 246°	395.0	455.0	26225.0	-281 Descending	FlightAware MLAT (5 sites)
Sun 06:39:40 PM	-33.7491	20.3994	↙ 245°	390.0	449.0	26205.0	-2,766 Descending	FlightAware MLAT (7 sites)
Sun 06:40:14 PM	-33.7735	20.3324	← 246°	385.0	443.0	23275.0	-2,841 Descending	FlightAware MLAT (4 sites)
Sun 06:40:44 PM	-33.796	20.2736	↙ 245°	389.0	448.0	23175.0	19 Climbing	FlightAware MLAT (6 sites)
Sun 06:41:14 PM	-33.8176	20.2164	↙ 245°	378.0	435.0	23294.0	95 Climbing	FlightAware MLAT (5 sites)
Sun 06:41:45 PM	-33.839	20.1583	← 246°	371.0	427.0	23272.0	-104 Descending	FlightAware MLAT (5 sites)
Sun 06:42:18 PM	-33.8622	20.0962	← 246°	371.0	427.0	23183.0	-4,321 Descending	FlightAware MLAT (5 sites)
Sun 06:42:53 PM	-33.8865	20.0307	← 246°	364.0	419.0	18375.0	-5,121 Descending	FlightAware MLAT (7 sites)
Sun 06:43:24 PM	-33.908	19.9742	← 246°	365.0	420.0	17550.0	-1,597 Descending	FlightAware MLAT (6 sites)
Sun 06:44:27 PM	-33.9503	19.8596	← 246°	356.0	410.0	16000.0	Level	FlightAware MLAT (6 sites)
Sun 06:44:57 PM	-33.9702	19.8055	← 246°	353.0	406.0	15975.0	-317 Descending	FlightAware MLAT (4 sites)
Sun 06:45:19 PM	-33.9847	19.7641	← 249°	366.0	421.0	15725.0	-529 Descending	FlightAware MLAT (6 sites)
Sun 06:45:48 PM	-33.9759	19.708	← 290°	386.0	444.0	15525.0	-475 Descending	FlightAware MLAT (7 sites)
Sun 06:46:19 PM	-33.9582	19.651	← 290°	351.0	404.0	15250.0	-435 Descending	FlightAware MLAT (9 sites)
Sun 06:46:50 PM	-33.9417	19.595	← 290°	343.0	395.0	15075.0	-242 Descending	FlightAware MLAT (7 sites)
Sun 06:47:21 PM	-33.9251	19.5401	← 290°	343.0	395.0	15000.0	-984 Descending	FlightAware MLAT (7 sites)
Sun 06:47:51 PM	-33.9091	19.4862	← 290°	340.0	391.0	14075.0	-1,725 Descending	FlightAware MLAT (9 sites)
Sun 06:48:21 PM	-33.8936	19.4302	← 288°	351.0	404.0	13275.0	-1,844 Descending	FlightAware MLAT (7 sites)
Sun 06:48:52 PM	-33.8771	19.3725	← 289°	352.0	405.0	12200.0	-2,090 Descending	FlightAware MLAT (7 sites)
Sun 06:49:22 PM	-33.8615	19.3178	← 289°	350.0	403.0	11150.0	-1,950 Descending	FlightAware MLAT (8 sites)
Sun 06:49:52 PM	-33.8456	19.2622	← 290°	349.0	402.0	10250.0	-1,435 Descending	FlightAware MLAT (10 sites)
Sun 06:50:08 PM	-33.837	19.2331	← 290°	344.0	396.0	10050.0	-706 Descending	FlightAware MLAT (9 sites)
Sun 06:50:26 PM	-33.8284	19.2012	← 288°	342.0	394.0	9850.0	-729 Descending	FlightAware MLAT (5 sites)
Sun 06:50:43 PM	-33.8196	19.1715	← 289°	335.0	386.0	9625.0	-838 Descending	FlightAware MLAT (4 sites)
Sun 06:51:00 PM	-33.8118	19.1433	← 288°	325.0	374.0	9375.0	-773 Descending	FlightAware MLAT (8 sites)
Sun 06:51:16 PM	-33.8053	19.1179	← 288°	313.0	360.0	9200.0	-574 Descending	FlightAware MLAT (7 sites)
Sun 06:51:34 PM	-33.797	19.0886	← 289°	307.0	353.0	9050.0	-250 Descending	FlightAware MLAT (8 sites)
Sun 06:52:04 PM	-33.7841	19.0428	← 289°	296.0	341.0	9000.0	-49 Descending	FlightAware MLAT (10 sites)
Sun 06:52:35 PM	-33.7722	18.9957	← 288°	290.0	334.0	9000.0	-96 Descending	FlightAware MLAT (10 sites)
Sun 06:52:51 PM	-33.7657	18.971	← 288°	290.0	334.0	8925.0	-516 Descending	FlightAware MLAT (10 sites)
Sun 06:53:07 PM	-33.7594	18.9471	← 288°	286.0	329.0	8725.0	-938 Descending	FlightAware MLAT (8 sites)
Sun 06:53:23 PM	-33.7532	18.9224	← 286°	293.0	337.0	8425.0	-943 Descending	FlightAware MLAT (8 sites)
Sun 06:53:42 PM	-33.7499	18.8927	← 280°	289.0	333.0	8175.000000000001	-1,350 Descending	FlightAware MLAT (5 sites)
Sun 06:54:03 PM	-33.7504	18.8593	← 273°	289.0	333.0	7525.0	-1,500 Descending	FlightAware MLAT (7 sites)
Sun 06:54:19 PM	-33.7507	18.8338	← 270°	288.0	331.0	7250.0	-1,149 Descending	FlightAware MLAT (8 sites)
Sun 06:54:50 PM	-33.7497	18.7842	← 272°	287.0	330.0	6625.0	-1,085 Descending	FlightAware MLAT (9 sites)
Sun 06:55:06 PM	-33.7484	18.7595	← 273°	283.0	326.0	6400.0	-870 Descending	FlightAware MLAT (9 sites)
Sun 06:55:40 PM	-33.7455	18.7102	← 274°	264.0	304.0	5900.0	-1,050 Descending	FlightAware MLAT (8 sites)
Sun 06:55:56 PM	-33.7438	18.6873	← 275°	260.0	299.0	5525.0	-1,176 Descending	FlightAware MLAT (7 sites)
Sun 06:56:17 PM	-33.7441	18.6581	← 266°	249.0	287.0	5175.0	-962 Descending	FlightAware MLAT (8 sites)
Sun 06:56:35 PM	-33.7492	18.634	← 256°	241.0	277.0	4900.0	-857 Descending	FlightAware MLAT (8 sites)
Sun 06:56:52 PM	-33.7545	18.6118	← 255°	242.0	278.0	4675.0	-857 Descending	FlightAware MLAT (8 sites)
Sun 06:57:24 PM	-33.762	18.5759	← 255°	201.0	231.0	4200.0	-794 Descending	FlightAware MLAT (8 sites)
Sun 06:57:43 PM	-33.7695	18.557	↙ 244°	195.0	224.0	4000.0	-711 Descending	FlightAware MLAT (8 sites)
Sun 06:58:21 PM	-33.7983	18.549	↓ 161°	126.0	145.0	3525.0	-861 Descending	FlightAware MLAT (6 sites)
Sun 06:58:37 PM	-33.8105	18.5533	↓ 164°	171.0	197.0	3225.0	-978 Descending	FlightAware MLAT (6 sites)
Sun 06:59:07 PM	-33.8333	18.5599	↓ 166°	168.0	193.0	2775.0	-815 Descending	FlightAware MLAT (6 sites)
Sun 06:59:23 PM	-33.8457	18.5641	↓ 165°	169.0	194.0	2600.0	-797 Descending	FlightAware MLAT (6 sites)
Sun 06:59:39 PM	-33.8558	18.5672	↓ 165°	150.0	173.0	2350.0	-1,000 Descending	FlightAware MLAT (6 sites)
Sun 06:59:56 PM	-33.8684	18.5713	↓ 165°	161.0	185.0	2050.0	-727 Descending	FlightAware MLAT (7 sites)
Sun 07:00:12 PM	-33.8795	18.5749	↓ 165°	156.0	180.0	1950.0	-727 Descending	FlightAware MLAT (7 sites)
Sun 07:00:29 PM	-33.8899	18.5782	↓ 165°	142.0	163.0	1650.0	-892 Descending	FlightAware MLAT (7 sites)
Sun 07:00:49 PM	-33.9019	18.5818	↓ 166°	136.0	157.0	1400.0	-730 Descending	FlightAware MLAT (4 sites)
Sun 07:01:06 PM	-33.9111	18.5848	↓ 165°	125.0	144.0	1200.0	-689 Descending	FlightAware MLAT (7 sites)
Sun 07:01:26 PM	-33.9218	18.5883	↓ 165°	121.0	139.0	975.0	-500 Descending	FlightAware MLAT (6 sites)
Sun 07:01:42 PM	-33.9308	18.5912	↓ 165°	124.0	143.0	900.0	-281 Descending	FlightAware MLAT (6 sites)
