# Supplementary material for: TrackMatcher – a tool for finding intercepts in tracks of geographical positions
Source: Copernicus journal article supplement (doi:10.5194/gmd-15-7557-2022), 2022-10-18
Supplement: Supplementary file 1 [file gmd-15-7557-2022-supplement.zip › ESM/example/data/flights/UAL200_27-JAN-2019_PGUM-PHNL.dat]

Time (CET)	Latitude	Longitude	Course	kts	mph	feet	Rate	Reporting Facility
Sun 11:00:23 PM	13.4931	144.8156	→ 66°	168.0	193.0	1225.0	Level	FlightAware ADS-B (PGUM)
Sun 11:00:39 PM	13.4996	144.8267	↗ 57°	165.0	190.0	1950.0	1,828 Climbing	FlightAware ADS-B (PGUM)
Sun 11:00:55 PM	13.5059	144.838	↗ 64°	187.0	215.0	2200.0	1,266 Climbing	FlightAware ADS-B (UAM / PGUA)
Sun 11:01:11 PM	13.5112	144.8516	→ 71°	201.0	231.0	2625.0	1,467 Climbing	FlightAware ADS-B (UAM / PGUA)
Sun 11:01:40 PM	13.5204	144.8791	→ 71°	228.0	262.0	3300.0	1,750 Climbing	FlightAware ADS-B (UAM / PGUA)
Sun 11:02:11 PM	13.5313	144.9112	→ 71°	239.0	275.0	4375.0	2,311 Climbing	FlightAware ADS-B (UAM / PGUA)
Sun 11:02:41 PM	13.5432	144.9454	→ 70°	251.0	289.0	5650.0	2,500 Climbing	FlightAware ADS-B (UAM / PGUA)
Sun 11:03:11 PM	13.5549	144.9795	→ 72°	256.0	295.0	6875.0	2,348 Climbing	FlightAware ADS-B (UAM / PGUA)
Sun 11:03:27 PM	13.5609	144.9977	→ 71°	262.0	302.0	7450.0	2,120 Climbing	FlightAware ADS-B (UAM / PGUA)
Sun 11:03:57 PM	13.5727	145.0337	→ 71°	272.0	313.0	8500.0	1,957 Climbing	FlightAware ADS-B (UAM / PGUA)
Sun 11:04:13 PM	13.5791	145.0528	→ 71°	280.0	322.0	8950.0	1,820 Climbing	FlightAware ADS-B (PGUM)
Sun 11:04:58 PM	13.5991	145.1115	→ 71°	301.0	346.0	10350.0	1,382 Climbing	FlightAware ADS-B (PGUM)
Sun 11:05:29 PM	13.614	145.1551	→ 71°	336.0	387.0	10700.0	787 Climbing	FlightAware ADS-B (PGUM)
Sun 11:05:59 PM	13.6301	145.2025	→ 71°	364.0	419.0	11150.0	1,000 Climbing	FlightAware ADS-B (PGUM)
Sun 11:06:29 PM	13.6472	145.2529	→ 71°	387.0	445.0	11700.0	1,575 Climbing	FlightAware ADS-B (PGUM)
Sun 11:06:59 PM	13.6649	145.3052	→ 71°	393.0	452.0	12725.0	2,025 Climbing	FlightAware ADS-B (PGUM)
Sun 11:07:29 PM	13.6832	145.3596	→ 71°	401.0	461.0	13725.0	1,850 Climbing	FlightAware ADS-B (PGUM)
Sun 11:07:59 PM	13.7015	145.4138	→ 71°	408.0	470.0	14575.0	1,600 Climbing	FlightAware ADS-B (PGUM)
Sun 11:08:29 PM	13.7203	145.4695	→ 71°	418.0	481.0	15325.0	1,550 Climbing	FlightAware ADS-B (PGUM)
Sun 11:08:59 PM	13.7389	145.5241	→ 71°	424.0	488.0	16125.0	1,600 Climbing	FlightAware ADS-B (PGUM)
Sun 11:09:29 PM	13.759	145.5835	→ 71°	431.0	496.0	16925.0	1,575 Climbing	FlightAware ADS-B (PGUM)
Sun 11:09:59 PM	13.7785	145.6418	→ 71°	437.0	503.0	17700.0	1,550 Climbing	FlightAware ADS-B (PGUM)
Sun 11:10:29 PM	13.7987	145.7017	→ 71°	441.0	507.0	18475.0	1,475 Climbing	FlightAware ADS-B (PGUM)
Sun 11:10:59 PM	13.8182	145.76	→ 71°	444.0	511.0	19175.0	1,450 Climbing	FlightAware ADS-B (PGUM)
Sun 11:11:29 PM	13.8389	145.8212	→ 71°	447.0	514.0	19925.0	1,375 Climbing	FlightAware ADS-B (PGUM)
Sun 11:11:59 PM	13.859	145.8815	→ 71°	449.0	517.0	20550.0	1,325 Climbing	FlightAware ADS-B (PGUM)
Sun 11:12:29 PM	13.8796	145.9426	→ 71°	452.0	520.0	21250.0	1,321 Climbing	FlightAware ADS-B (PGUM)
Sun 11:13:06 PM	13.9047	146.0176	→ 71°	457.0	526.0	22025.0	1,233 Climbing	FlightAware ADS-B (PGUM)
Sun 11:13:42 PM	13.9301	146.0934	→ 71°	462.0	532.0	22750.0	1,181 Climbing	FlightAware ADS-B (UAM / PGUA)
Sun 11:14:26 PM	13.9604	146.1838	→ 71°	471.0	542.0	23600.0	1,116 Climbing	FlightAware ADS-B (PGUM)
Sun 11:15:04 PM	13.9878	146.2659	→ 71°	479.0	551.0	24275.0	1,054 Climbing	FlightAware ADS-B (PGUM)
Sun 11:15:40 PM	14.0139	146.3442	→ 71°	482.0	555.0	24900.0	1,091 Climbing	FlightAware ADS-B (PGUM)
Sun 11:16:21 PM	14.0431	146.4321	→ 71°	486.0	559.0	25675.0	1,099 Climbing	FlightAware ADS-B (PGUM)
Sun 11:16:51 PM	14.065	146.4975	→ 71°	490.0	564.0	26200.0	1,025 Climbing	FlightAware ADS-B (PGUM)
Sun 11:17:21 PM	14.087	146.5638	→ 71°	494.0	568.0	26700.0	1,000 Climbing	FlightAware ADS-B (PGUM)
Sun 11:17:51 PM	14.1091	146.6305	→ 71°	497.0	572.0	27200.0	978 Climbing	FlightAware ADS-B (PGUM)
Sun 11:18:30 PM	14.1392	146.7214	→ 71°	503.0	579.0	27825.0	930 Climbing	FlightAware ADS-B (PGUM)
Sun 11:19:10 PM	14.1686	146.8102	→ 71°	507.0	583.0	28425.0	846 Climbing	FlightAware ADS-B (PGUM)
Sun 11:19:48 PM	14.1982	146.8996	→ 71°	513.0	590.0	28925.0	804 Climbing	FlightAware ADS-B (PGUM)
Sun 11:21:30 PM	14.2667	147.1167	→ 71°	520.0	598.0	30300.0	954 Climbing	Guam Center
Sun 11:22:30 PM	14.3167	147.2667	→ 71°	520.0	598.0	31500.0	1,150 Climbing	Guam Center
Sun 11:23:30 PM	14.3667	147.4	→ 69°	510.0	587.0	32600.0	1,000 Climbing	Guam Center
Sun 11:24:30 PM	14.4	147.5333	→ 76°	500.0	575.0	33500.0	900 Climbing	Guam Center
Sun 11:25:30 PM	14.45	147.6667	→ 69°	510.0	587.0	34400.0	750 Climbing	Guam Center
Sun 11:26:30 PM	14.4833	147.8	→ 75°	510.0	587.0	35000.0	300 Climbing	Guam Center
Sun 11:27:30 PM	14.5333	147.9333	→ 69°	500.0	575.0	35000.0	Level	Guam Center
Sun 11:28:30 PM	14.5667	148.0667	→ 76°	510.0	587.0	35000.0	Level	Guam Center
Sun 11:29:30 PM	14.6167	148.2167	→ 71°	500.0	575.0	35000.0	Level	Guam Center
Sun 11:30:30 PM	14.65	148.35	→ 75°	510.0	587.0	35000.0	Level	Guam Center
Sun 11:31:30 PM	14.7	148.4833	→ 69°	500.0	575.0	35000.0	Level	Guam Center
Sun 11:32:30 PM	14.75	148.6167	→ 69°	530.0	610.0	35000.0	Level	Guam Center
Sun 11:33:30 PM	14.8	148.7667	→ 71°	500.0	575.0	35000.0	Level	Guam Center
Sun 11:34:30 PM	14.8333	148.9	→ 75°	500.0	575.0	35000.0	Level	Guam Center
Sun 11:43:40 PM	15.2	150.2	→ 75°	513.0	590.0	35000.0	Level	Oakland Oceanic
Sun 11:46:43 PM	15.304	150.5909	→ 75°	513.0	590.0	35000.0	Level	FlightAware Transoceanic
Sun 11:48:41 PM	15.3788	150.8741	→ 75°	513.0	590.0	35000.0	Level	FlightAware Transoceanic
Sun 11:50:46 PM	15.4577	151.1744	→ 75°	513.0	590.0	35000.0	Level	FlightAware Transoceanic
Sun 11:52:04 PM	15.5067	151.3619	→ 75°	513.0	590.0	35000.0	Level	FlightAware Transoceanic
Sun 11:53:17 PM	15.5667	151.5667	→ 75°	514.0	592.0	35000.0	Level	Oakland Oceanic
Sun 11:55:06 PM	15.6441	151.8668	→ 75°	514.0	592.0	35000.0	Level	FlightAware Transoceanic
Sun 11:57:13 PM	15.7216	152.1691	→ 75°	514.0	592.0	35000.0	Level	FlightAware Transoceanic
Sun 11:58:34 PM	15.7709	152.3621	→ 75°	514.0	592.0	35000.0	Level	FlightAware Transoceanic
Mon 12:00:04 AM	15.8254	152.5766	→ 75°	514.0	592.0	35000.0	Level	FlightAware Transoceanic
Mon 12:01:35 AM	15.8803	152.7936	→ 75°	514.0	592.0	35000.0	Level	FlightAware Transoceanic
Mon 12:02:52 AM	15.9167	152.9333	→ 75°	515.0	593.0	35000.0	Level	Oakland Oceanic
Mon 12:12:28 AM	16.25	154.3167	→ 76°	516.0	594.0	35000.0	Level	Oakland Oceanic
Mon 12:15:05 AM	16.3581	154.7564	→ 76°	516.0	594.0	35000.0	Level	FlightAware Transoceanic
Mon 12:16:50 AM	16.419	155.006	→ 76°	516.0	594.0	35000.0	Level	FlightAware Transoceanic
Mon 12:18:11 AM	16.4658	155.1987	→ 76°	516.0	594.0	35000.0	Level	FlightAware Transoceanic
Mon 12:20:04 AM	16.5308	155.4676	→ 76°	516.0	594.0	35000.0	Level	FlightAware Transoceanic
Mon 12:21:22 AM	16.5755	155.6533	→ 76°	516.0	594.0	35000.0	Level	FlightAware Transoceanic
Mon 12:22:04 AM	16.5833	155.7	→ 76°	517.0	595.0	35000.0	Level	Oakland Oceanic
Mon 12:24:36 AM	16.6746	156.0799	→ 76°	517.0	595.0	35000.0	Level	FlightAware Transoceanic
Mon 12:26:36 AM	16.7444	156.3724	→ 76°	517.0	595.0	35000.0	Level	FlightAware Transoceanic
Mon 12:28:07 AM	16.797	156.5944	→ 76°	517.0	595.0	35000.0	Level	FlightAware Transoceanic
Mon 12:29:38 AM	16.8494	156.8164	→ 76°	517.0	595.0	35000.0	Level	FlightAware Transoceanic
Mon 12:30:44 AM	16.8872	156.9776	→ 76°	517.0	595.0	35000.0	Level	FlightAware Transoceanic
Mon 12:31:41 AM	16.9167	157.1	→ 76°	515.0	593.0	35000.0	Level	Oakland Oceanic
Mon 12:35:08 AM	17.0344	157.6091	→ 76°	515.0	593.0	35000.0	Level	FlightAware Transoceanic
Mon 12:36:18 AM	17.0667	157.75	→ 77°	516.0	594.0	35000.0	Level	Oakland Oceanic
Mon 12:38:09 AM	17.1364	158.0623	→ 77°	516.0	594.0	35000.0	Level	FlightAware Transoceanic
Mon 12:39:15 AM	17.1719	158.2222	→ 77°	516.0	594.0	35000.0	Level	FlightAware Transoceanic
Mon 12:41:17 AM	17.2333	158.5	→ 77°	517.0	595.0	35000.0	Level	Oakland Oceanic
Mon 12:43:07 AM	17.3006	158.8072	→ 77°	517.0	595.0	35000.0	Level	FlightAware Transoceanic
Mon 12:44:36 AM	17.3475	159.0225	→ 77°	517.0	595.0	35000.0	Level	FlightAware Transoceanic
Mon 12:46:36 AM	17.4103	159.3131	→ 77°	517.0	595.0	35000.0	Level	FlightAware Transoceanic
Mon 12:48:43 AM	17.4764	159.6209	→ 77°	517.0	595.0	35000.0	Level	FlightAware Transoceanic
Mon 12:50:40 AM	17.5368	159.9046	→ 77°	517.0	595.0	35000.0	Level	FlightAware Transoceanic
Mon 12:50:53 AM	17.5333	159.9167	→ 77°	517.0	595.0	35000.0	Level	Oakland Oceanic
Mon 01:00:30 AM	17.8333	161.3167	→ 78°	521.0	600.0	35000.0	Level	Oakland Oceanic
Mon 01:03:19 AM	17.9332	161.8103	→ 78°	521.0	600.0	35000.0	Level	FlightAware Transoceanic
Mon 01:04:35 AM	17.9711	161.9988	→ 78°	521.0	600.0	35000.0	Level	FlightAware Transoceanic
Mon 01:06:38 AM	18.0319	162.3041	→ 78°	521.0	600.0	35000.0	Level	FlightAware Transoceanic
Mon 01:08:23 AM	18.0835	162.5648	→ 78°	521.0	600.0	35000.0	Level	FlightAware Transoceanic
Mon 01:09:51 AM	18.1264	162.7835	→ 78°	521.0	600.0	35000.0	Level	FlightAware Transoceanic
Mon 01:10:05 AM	18.1167	162.75	→ 78°	523.0	602.0	35000.0	Level	Oakland Oceanic
Mon 01:12:41 AM	18.1961	163.1561	→ 78°	523.0	602.0	35000.0	Level	FlightAware Transoceanic
Mon 01:15:07 AM	18.2675	163.5247	→ 79°	523.0	602.0	35000.0	Level	FlightAware Transoceanic
Mon 01:17:09 AM	18.3265	163.8329	→ 79°	523.0	602.0	35000.0	Level	FlightAware Transoceanic
Mon 01:19:02 AM	18.3807	164.1185	→ 79°	523.0	602.0	35000.0	Level	FlightAware Transoceanic
Mon 01:19:42 AM	18.4	164.2	→ 79°	527.0	606.0	35000.0	Level	Oakland Oceanic
Mon 01:21:21 AM	18.4392	164.4104	→ 79°	527.0	606.0	35000.0	Level	FlightAware Transoceanic
Mon 01:23:07 AM	18.4902	164.6859	→ 79°	527.0	606.0	35000.0	Level	FlightAware Transoceanic
Mon 01:24:36 AM	18.5328	164.9174	→ 79°	527.0	606.0	35000.0	Level	FlightAware Transoceanic
Mon 01:26:38 AM	18.5906	165.2348	→ 79°	527.0	606.0	35000.0	Level	FlightAware Transoceanic
Mon 01:28:20 AM	18.6385	165.5004	→ 79°	527.0	606.0	35000.0	Level	FlightAware Transoceanic
Mon 01:29:18 AM	18.6667	165.65	→ 79°	526.0	605.0	35000.0	Level	Oakland Oceanic
Mon 01:36:22 AM	18.85	166.7	→ 80°	515.0	593.0	35000.0	Level	Oakland Oceanic
Mon 01:38:55 AM	18.9333	167.1	→ 80°	515.0	593.0	35000.0	Level	Oakland Oceanic
Mon 01:42:12 AM	19.0137	167.5826	→ 80°	515.0	593.0	35000.0	Level	FlightAware Transoceanic
Mon 01:43:19 AM	19.0415	167.7511	→ 80°	515.0	593.0	35000.0	Level	FlightAware Transoceanic
Mon 01:44:36 AM	19.0732	167.9449	→ 80°	515.0	593.0	35000.0	Level	FlightAware Transoceanic
Mon 01:46:38 AM	19.123	168.252	→ 80°	515.0	593.0	35000.0	Level	FlightAware Transoceanic
Mon 01:48:30 AM	19.1667	168.55	→ 80°	518.0	596.0	35000.0	Level	Oakland Oceanic
Mon 01:50:28 AM	19.2251	168.916	→ 80°	518.0	596.0	35000.0	Level	FlightAware Transoceanic
Mon 01:51:38 AM	19.2524	169.0891	→ 81°	518.0	596.0	35000.0	Level	FlightAware Transoceanic
Mon 01:52:50 AM	19.2804	169.2673	→ 81°	518.0	596.0	35000.0	Level	FlightAware Transoceanic
Mon 01:53:52 AM	19.3043	169.4208	→ 81°	518.0	596.0	35000.0	Level	FlightAware Transoceanic
Mon 01:55:07 AM	19.3331	169.6065	→ 81°	518.0	596.0	35000.0	Level	FlightAware Transoceanic
Mon 01:57:05 AM	19.3781	169.8989	→ 81°	518.0	596.0	35000.0	667 Climbing	FlightAware Transoceanic
Mon 01:58:07 AM	19.4	169.9833	→ 81°	510.0	587.0	37000.0	Level	Oakland Oceanic
Mon 01:58:08 AM	19.4018	170.055	→ 81°	518.0	596.0	35000.0	Level	FlightAware Transoceanic
Mon 02:00:25 AM	19.4543	170.3483	→ 81°	510.0	587.0	37000.0	455 Climbing	FlightAware Transoceanic
Mon 02:02:32 AM	19.5012	170.6684	→ 81°	510.0	587.0	37000.0	Level	FlightAware Transoceanic
Mon 02:04:36 AM	19.5464	170.9812	→ 81°	510.0	587.0	37000.0	Level	FlightAware Transoceanic
Mon 02:06:38 AM	19.5905	171.289	→ 81°	510.0	587.0	37000.0	Level	FlightAware Transoceanic
Mon 02:07:43 AM	19.6	171.4	→ 81°	511.0	588.0	37000.0	Level	Oakland Oceanic
Mon 02:09:39 AM	19.6379	171.6632	→ 81°	511.0	588.0	37000.0	Level	FlightAware Transoceanic
Mon 02:11:46 AM	19.6859	172.001	→ 81°	511.0	588.0	37000.0	Level	FlightAware Transoceanic
Mon 02:13:08 AM	19.7166	172.2193	→ 82°	511.0	588.0	37000.0	Level	FlightAware Transoceanic
Mon 02:15:08 AM	19.761	172.5388	→ 82°	511.0	588.0	37000.0	Level	FlightAware Transoceanic
Mon 02:16:36 AM	19.7932	172.7732	→ 82°	511.0	588.0	37000.0	Level	FlightAware Transoceanic
Mon 02:17:19 AM	19.8167	172.8333	→ 84°	513.0	590.0	37000.0	Level	Oakland Oceanic
Mon 02:20:33 AM	19.877	173.3965	→ 82°	513.0	590.0	37000.0	Level	FlightAware Transoceanic
Mon 02:20:41 AM	19.8667	173.3167	→ 82°	510.0	587.0	37000.0	Level	Oakland Oceanic
Mon 02:26:55 AM	20.0	174.2667	→ 83°	511.0	588.0	37000.0	Level	Oakland Oceanic
Mon 02:30:07 AM	20.0562	174.7355	→ 83°	511.0	588.0	37000.0	Level	FlightAware Transoceanic
Mon 02:31:36 AM	20.0825	174.9586	→ 83°	511.0	588.0	37000.0	Level	FlightAware Transoceanic
Mon 02:33:07 AM	20.1091	175.1867	→ 83°	511.0	588.0	37000.0	Level	FlightAware Transoceanic
Mon 02:35:08 AM	20.1441	175.4902	→ 83°	511.0	588.0	37000.0	Level	FlightAware Transoceanic
Mon 02:36:31 AM	20.1667	175.7	→ 83°	513.0	590.0	37000.0	Level	Oakland Oceanic
Mon 02:39:40 AM	20.2273	176.2423	→ 83°	513.0	590.0	37000.0	Level	FlightAware Transoceanic
Mon 02:41:36 AM	20.2586	176.5284	→ 83°	513.0	590.0	37000.0	Level	FlightAware Transoceanic
Mon 02:42:49 AM	20.278	176.7085	→ 83°	513.0	590.0	37000.0	Level	FlightAware Transoceanic
Mon 02:44:50 AM	20.3098	177.0072	→ 84°	513.0	590.0	37000.0	Level	FlightAware Transoceanic
Mon 02:46:07 AM	20.3333	177.15	→ 84°	513.0	590.0	37000.0	Level	Oakland Oceanic
Mon 02:55:44 AM	20.4833	178.6	→ 85°	515.0	593.0	37000.0	Level	Oakland Oceanic
Mon 02:57:40 AM	20.5058	178.8591	→ 85°	515.0	593.0	37000.0	Level	FlightAware Transoceanic
Mon 02:59:39 AM	20.532	179.1675	→ 85°	515.0	593.0	37000.0	Level	FlightAware Transoceanic
Mon 03:01:37 AM	20.5574	179.4735	→ 85°	515.0	593.0	37000.0	Level	FlightAware Transoceanic
Mon 03:02:38 AM	20.5704	179.6317	→ 85°	515.0	593.0	37000.0	Level	FlightAware Transoceanic
Mon 03:05:06 AM	20.6013	-179.9849	→ 85°	515.0	593.0	37000.0	Level	FlightAware Transoceanic
Mon 03:05:09 AM	20.6	-180.0	→ 85°	514.0	592.0	37000.0	Level	Oakland Oceanic
Mon 03:05:21 AM	20.6167	-179.95	→ 85°	516.0	594.0	37000.0	Level	Oakland Oceanic
Mon 03:08:06 AM	20.6558	-179.4766	→ 85°	516.0	594.0	37000.0	Level	FlightAware Transoceanic
Mon 03:10:07 AM	20.6806	-179.1686	→ 85°	516.0	594.0	37000.0	Level	FlightAware Transoceanic
Mon 03:11:35 AM	20.6982	-178.9444	→ 85°	516.0	594.0	37000.0	Level	FlightAware Transoceanic
Mon 03:13:06 AM	20.7162	-178.7126	→ 85°	516.0	594.0	37000.0	Level	FlightAware Transoceanic
Mon 03:14:39 AM	20.7342	-178.4757	→ 85°	516.0	594.0	37000.0	Level	FlightAware Transoceanic
Mon 03:14:56 AM	20.7333	-178.5	→ 85°	514.0	592.0	37000.0	Level	Oakland Oceanic
Mon 03:17:44 AM	20.7647	-178.0769	→ 86°	514.0	592.0	37000.0	Level	FlightAware Transoceanic
Mon 03:19:39 AM	20.786	-177.7802	→ 86°	514.0	592.0	37000.0	Level	FlightAware Transoceanic
Mon 03:21:37 AM	20.8074	-177.4756	→ 86°	514.0	592.0	37000.0	Level	FlightAware Transoceanic
Mon 03:23:09 AM	20.8238	-177.238	→ 86°	514.0	592.0	37000.0	Level	FlightAware Transoceanic
Mon 03:24:50 AM	20.8333	-177.05	→ 86°	515.0	593.0	37000.0	Level	Oakland Oceanic
Mon 03:26:44 AM	20.8603	-176.6434	→ 86°	515.0	593.0	37000.0	Level	FlightAware Transoceanic
Mon 03:28:08 AM	20.8737	-176.435	→ 86°	515.0	593.0	37000.0	Level	FlightAware Transoceanic
Mon 03:30:06 AM	20.8922	-176.1423	→ 86°	515.0	593.0	37000.0	Level	FlightAware Transoceanic
Mon 03:31:37 AM	20.9061	-175.9165	→ 86°	515.0	593.0	37000.0	Level	FlightAware Transoceanic
Mon 03:32:42 AM	20.9158	-175.7552	→ 86°	515.0	593.0	37000.0	Level	FlightAware Transoceanic
Mon 03:34:08 AM	20.9167	-175.5833	→ 86°	517.0	595.0	37000.0	Level	Oakland Oceanic
Mon 03:36:35 AM	20.9411	-175.1791	→ 86°	517.0	595.0	37000.0	Level	FlightAware Transoceanic
Mon 03:38:03 AM	20.9545	-174.9498	→ 86°	517.0	595.0	37000.0	Level	FlightAware Transoceanic
Mon 03:40:04 AM	20.9724	-174.6343	→ 87°	517.0	595.0	37000.0	Level	FlightAware Transoceanic
Mon 03:41:37 AM	20.9858	-174.3918	→ 87°	517.0	595.0	37000.0	Level	FlightAware Transoceanic
Mon 03:43:09 AM	20.9987	-174.1519	→ 87°	517.0	595.0	37000.0	Level	FlightAware Transoceanic
Mon 03:43:45 AM	21.0	-174.1167	→ 87°	517.0	595.0	37000.0	Level	Oakland Oceanic
Mon 03:53:21 AM	21.0667	-172.65	→ 87°	521.0	600.0	37000.0	Level	Oakland Oceanic
Mon 03:55:57 AM	21.0867	-172.2565	→ 87°	521.0	600.0	37000.0	Level	FlightAware Transoceanic
Mon 03:57:48 AM	21.1	-171.9833	→ 88°	525.0	604.0	37000.0	Level	Oakland Oceanic
Mon 04:00:04 AM	21.1094	-171.6564	→ 88°	525.0	604.0	37000.0	Level	FlightAware Transoceanic
Mon 04:01:37 AM	21.1161	-171.4114	→ 88°	525.0	604.0	37000.0	Level	FlightAware Transoceanic
Mon 04:02:59 AM	21.1167	-171.1667	→ 88°	531.0	611.0	37000.0	Level	Oakland Oceanic
Mon 04:05:06 AM	21.1249	-170.8362	→ 89°	531.0	611.0	37000.0	Level	FlightAware Transoceanic
Mon 04:06:44 AM	21.1309	-170.5789	→ 89°	531.0	611.0	37000.0	Level	FlightAware Transoceanic
Mon 04:08:22 AM	21.1365	-170.3215	→ 89°	531.0	611.0	37000.0	Level	FlightAware Transoceanic
Mon 04:09:39 AM	21.1406	-170.1193	→ 89°	531.0	611.0	37000.0	Level	FlightAware Transoceanic
Mon 04:11:36 AM	21.1464	-169.812	→ 89°	531.0	611.0	37000.0	Level	FlightAware Transoceanic
Mon 04:12:34 AM	21.15	-169.65	→ 89°	532.0	612.0	37000.0	Level	Oakland Oceanic
Mon 04:15:08 AM	21.1575	-169.1646	→ 89°	532.0	612.0	37000.0	Level	FlightAware Transoceanic
Mon 04:17:07 AM	21.1615	-168.8573	→ 89°	532.0	612.0	37000.0	Level	FlightAware Transoceanic
Mon 04:18:12 AM	21.1635	-168.6894	→ 89°	532.0	612.0	37000.0	Level	FlightAware Transoceanic
Mon 04:20:04 AM	21.1665	-168.4002	→ 89°	532.0	612.0	37000.0	Level	FlightAware Transoceanic
Mon 04:22:09 AM	21.1667	-168.1333	→ 89°	534.0	615.0	37000.0	Level	Oakland Oceanic
Mon 04:31:46 AM	21.1667	-166.6167	→ 90°	533.0	613.0	37000.0	Level	Oakland Oceanic
Mon 04:35:07 AM	21.1669	-166.122	→ 90°	533.0	613.0	37000.0	Level	FlightAware Transoceanic
Mon 04:36:36 AM	21.1664	-165.8864	→ 90°	533.0	613.0	37000.0	Level	FlightAware Transoceanic
Mon 04:38:07 AM	21.1656	-165.6455	→ 90°	533.0	613.0	37000.0	Level	FlightAware Transoceanic
Mon 04:40:18 AM	21.1639	-165.2987	→ 90°	533.0	613.0	37000.0	Level	FlightAware Transoceanic
Mon 04:41:22 AM	21.1667	-165.0833	→ 91°	536.0	617.0	37000.0	Level	Oakland Oceanic
Mon 04:44:36 AM	21.1602	-164.5583	→ 91°	536.0	617.0	37000.0	Level	FlightAware Transoceanic
Mon 04:46:39 AM	21.1557	-164.2595	→ 91°	536.0	617.0	37000.0	Level	FlightAware Transoceanic
Mon 04:48:57 AM	21.1333	-163.8667	→ 91°	540.0	621.0	37000.0	Level	Honolulu Center
Mon 04:49:57 AM	21.15	-163.7167	→ 83°	640.0	736.0	37000.0	Level	Honolulu Center
Mon 04:50:57 AM	21.1667	-163.5667	→ 83°	530.0	610.0	37000.0	Level	Honolulu Center
Mon 04:51:57 AM	21.1667	-163.4	→ 90°	530.0	610.0	37000.0	Level	Honolulu Center
Mon 04:52:57 AM	21.1833	-163.25	→ 83°	530.0	610.0	37000.0	Level	Honolulu Center
Mon 04:53:57 AM	21.2	-163.1	→ 83°	530.0	610.0	37000.0	Level	Honolulu Center
Mon 04:54:57 AM	21.2	-162.9333	→ 90°	530.0	610.0	37000.0	Level	Honolulu Center
Mon 04:55:58 AM	21.2167	-162.7833	→ 83°	530.0	610.0	37000.0	Level	Honolulu Center
Mon 04:56:58 AM	21.2333	-162.6167	→ 84°	530.0	610.0	37000.0	Level	Honolulu Center
Mon 04:57:58 AM	21.2333	-162.4667	→ 90°	530.0	610.0	37000.0	-17 Descending	Honolulu Center
Mon 04:58:26 AM	21.2547	-162.379	→ 86°	534.0	615.0	36975.0	Level	FlightAware ADS-B (OGG / PHOG)
Mon 04:58:56 AM	21.2598	-162.3002	→ 86°	534.0	615.0	37000.0	17 Climbing	FlightAware ADS-B (OGG / PHOG)
Mon 04:59:53 AM	21.2695	-162.1484	→ 86°	533.0	613.0	37000.0	-17 Descending	FlightAware ADS-B (PHNL)
Mon 05:00:25 AM	21.2747	-162.0666	→ 86°	532.0	612.0	36975.0	-24 Descending	FlightAware ADS-B (OGG / PHOG)
Mon 05:00:56 AM	21.2799	-161.9838	→ 86°	530.0	610.0	36975.0	Level	FlightAware ADS-B (OGG / PHOG)
Mon 05:01:49 AM	21.2885	-161.8463	→ 86°	527.0	606.0	36975.0	18 Climbing	FlightAware ADS-B (PHNL)
Mon 05:02:21 AM	21.2935	-161.7636	→ 86°	526.0	605.0	37000.0	Level	FlightAware ADS-B (PHNL)
Mon 05:02:51 AM	21.2984	-161.6841	→ 86°	525.0	604.0	36975.0	-18 Descending	FlightAware ADS-B (PHNL)
Mon 05:03:45 AM	21.3068	-161.5459	→ 86°	525.0	604.0	36975.0	Level	FlightAware ADS-B (PHNL)
Mon 05:04:15 AM	21.3114	-161.4682	→ 86°	525.0	604.0	36975.0	17 Climbing	FlightAware ADS-B (PHNL)
Mon 05:05:14 AM	21.3205	-161.3131	→ 86°	524.0	603.0	37000.0	16 Climbing	FlightAware ADS-B (PHNL)
Mon 05:05:48 AM	21.3255	-161.2266	→ 86°	525.0	604.0	37000.0	-17 Descending	FlightAware ADS-B (PHNL)
Mon 05:06:43 AM	21.3338	-161.0824	→ 87°	527.0	606.0	36975.0	Level	FlightAware ADS-B (PHNL)
Mon 05:07:13 AM	21.3381	-161.0058	→ 87°	527.0	606.0	37000.0	22 Climbing	FlightAware ADS-B (PHNL)
Mon 05:07:50 AM	21.3436	-160.9068	→ 87°	528.0	608.0	37000.0	-20 Descending	FlightAware ADS-B (LIH / PHLI)
Mon 05:08:28 AM	21.349	-160.8096	→ 87°	527.0	606.0	36975.0	-21 Descending	FlightAware ADS-B (LIH / PHLI)
Mon 05:09:02 AM	21.3539	-160.7209	→ 87°	526.0	605.0	36975.0	Level	FlightAware ADS-B (LIH / PHLI)
Mon 05:09:32 AM	21.3582	-160.6434	→ 87°	524.0	603.0	36975.0	25 Climbing	FlightAware ADS-B (LIH / PHLI)
Mon 05:10:02 AM	21.3625	-160.5642	→ 87°	524.0	603.0	37000.0	25 Climbing	FlightAware ADS-B (LIH / PHLI)
Mon 05:10:32 AM	21.3667	-160.4866	→ 87°	523.0	602.0	37000.0	Level	FlightAware ADS-B (LIH / PHLI)
Mon 05:11:02 AM	21.3707	-160.4098	→ 87°	521.0	600.0	37000.0	-98 Descending	FlightAware ADS-B (LIH / PHLI)
Mon 05:11:33 AM	21.3749	-160.3299	→ 87°	515.0	593.0	36900.0	-762 Descending	FlightAware ADS-B (LIH / PHLI)
Mon 05:12:03 AM	21.3786	-160.2579	→ 87°	503.0	579.0	36225.0	-2,300 Descending	FlightAware ADS-B (OGG / PHOG)
Mon 05:12:33 AM	21.3828	-160.1796	→ 87°	506.0	582.0	34600.0	-3,150 Descending	FlightAware ADS-B (LIH / PHLI)
Mon 05:13:03 AM	21.3868	-160.1039	→ 87°	509.0	586.0	33075.0	-2,950 Descending	FlightAware ADS-B (LIH / PHLI)
Mon 05:13:33 AM	21.3907	-160.0304	→ 87°	513.0	590.0	31650.0	-3,000 Descending	FlightAware ADS-B (OGG / PHOG)
Mon 05:14:03 AM	21.3945	-159.9522	→ 87°	509.0	586.0	30075.0	-2,800 Descending	FlightAware ADS-B (LIH / PHLI)
Mon 05:14:33 AM	21.3981	-159.8794	→ 87°	505.0	581.0	28850.0	-2,450 Descending	FlightAware ADS-B (LIH / PHLI)
Mon 05:15:03 AM	21.4017	-159.8053	→ 87°	499.0	574.0	27625.0	-2,486 Descending	FlightAware ADS-B (OGG / PHOG)
Mon 05:15:43 AM	21.4058	-159.7254	→ 87°	494.0	568.0	25950.0	-2,657 Descending	FlightAware ADS-B (OGG / PHOG)
Mon 05:16:13 AM	21.4086	-159.6313	→ 90°	501.0	577.0	24525.0	-2,700 Descending	FlightAware ADS-B (OGG / PHOG)
Mon 05:16:43 AM	21.4068	-159.5567	→ 92°	500.0	575.0	23250.0	-2,375 Descending	FlightAware ADS-B (OGG / PHOG)
Mon 05:17:13 AM	21.4034	-159.4844	→ 93°	489.0	563.0	22150.0	-2,200 Descending	FlightAware ADS-B (OGG / PHOG)
Mon 05:17:43 AM	21.3993	-159.4124	→ 94°	477.0	549.0	21050.0	-2,050 Descending	FlightAware ADS-B (LIH / PHLI)
Mon 05:18:13 AM	21.3953	-159.3424	→ 93°	463.0	533.0	20100.0	-1,975 Descending	FlightAware ADS-B (OGG / PHOG)
Mon 05:18:43 AM	21.3913	-159.2744	→ 94°	451.0	519.0	19075.0	-1,975 Descending	FlightAware ADS-B (LIH / PHLI)
Mon 05:19:13 AM	21.3875	-159.2078	→ 94°	448.0	516.0	18125.0	-1,875 Descending	FlightAware ADS-B (LIH / PHLI)
Mon 05:19:43 AM	21.3835	-159.1415	→ 94°	452.0	520.0	17200.0	-1,800 Descending	FlightAware ADS-B (LIH / PHLI)
Mon 05:20:13 AM	21.3792	-159.0742	→ 94°	452.0	520.0	16325.0	-1,425 Descending	FlightAware ADS-B (LIH / PHLI)
Mon 05:20:43 AM	21.3748	-159.0092	→ 94°	428.0	493.0	15775.0	-1,200 Descending	FlightAware ADS-B (LIH / PHLI)
Mon 05:21:13 AM	21.371	-158.9466	→ 93°	411.0	473.0	15125.0	-1,770 Descending	FlightAware ADS-B (OGG / PHOG)
Mon 05:21:44 AM	21.3675	-158.8846	→ 94°	405.0	466.0	13975.0	-2,238 Descending	FlightAware ADS-B (OGG / PHOG)
Mon 05:22:14 AM	21.3641	-158.8263	→ 94°	396.0	456.0	12850.0	-2,200 Descending	FlightAware ADS-B (OGG / PHOG)
Mon 05:22:44 AM	21.3604	-158.769	→ 95°	393.0	452.0	11775.0	-1,820 Descending	FlightAware ADS-B (OGG / PHOG)
Mon 05:23:15 AM	21.3563	-158.7085	→ 94°	371.0	427.0	11000.0	-1,137 Descending	FlightAware ADS-B (LIH / PHLI)
Mon 05:23:46 AM	21.3528	-158.6512	→ 94°	332.0	382.0	10600.0	-1,060 Descending	FlightAware ADS-B (KOA / PHKO)
Mon 05:24:13 AM	21.3497	-158.6105	→ 95°	300.0	345.0	9975.0	-1,500 Descending	FlightAware ADS-B (PHIK)
Mon 05:24:30 AM	21.3481	-158.5875	→ 94°	286.0	329.0	9500.0	-2,143 Descending	FlightAware ADS-B (PHNL)
Mon 05:24:48 AM	21.3466	-158.5608	→ 93°	282.0	325.0	8725.0	-2,281 Descending	FlightAware ADS-B (PHNL)
Mon 05:25:18 AM	21.3446	-158.5183	→ 94°	280.0	322.0	7675.0	-1,925 Descending	FlightAware ADS-B (PHIK)
Mon 05:25:48 AM	21.3419	-158.4773	→ 94°	281.0	323.0	6800.0	-1,600 Descending	FlightAware ADS-B (PHIK)
Mon 05:26:18 AM	21.3391	-158.4351	→ 94°	279.0	321.0	6075.0	-1,435 Descending	FlightAware ADS-B (PHIK)
Mon 05:26:34 AM	21.3377	-158.4145	→ 94°	276.0	318.0	5700.0	-1,565 Descending	FlightAware ADS-B (PHIK)
Mon 05:27:04 AM	21.3351	-158.3749	→ 94°	269.0	310.0	4875.0	-1,625 Descending	FlightAware ADS-B (OGG / PHOG)
Mon 05:27:34 AM	21.3326	-158.3348	→ 94°	261.0	300.0	4075.0	-1,150 Descending	FlightAware ADS-B (PHNL)
Mon 05:28:04 AM	21.3303	-158.2979	→ 94°	249.0	287.0	3725.0	-469 Descending	FlightAware ADS-B (PHNL)
Mon 05:28:38 AM	21.3274	-158.2564	→ 94°	222.0	255.0	3575.0	-180 Descending	FlightAware ADS-B (PHIK)
Mon 05:28:54 AM	21.3263	-158.2406	→ 94°	222.0	255.0	3575.0	Level	FlightAware ADS-B (PHNL)
Mon 05:29:23 AM	21.325	-158.2088	→ 91°	222.0	255.0	3575.0	-33 Descending	FlightAware ADS-B (PHIK)
Mon 05:29:39 AM	21.3251	-158.1913	→ 90°	216.0	249.0	3550.0	-261 Descending	FlightAware ADS-B (PHNL)
Mon 05:30:09 AM	21.3252	-158.1585	→ 90°	218.0	251.0	3375.0	-391 Descending	FlightAware ADS-B (PHNL)
Mon 05:30:25 AM	21.3252	-158.1422	→ 90°	222.0	255.0	3250.0	-469 Descending	FlightAware ADS-B (PHHI)
Mon 05:30:41 AM	21.3251	-158.1247	→ 90°	214.0	246.0	3125.0	-516 Descending	FlightAware ADS-B (PHNL)
Mon 05:30:57 AM	21.3251	-158.1078	→ 90°	203.0	234.0	2975.0	-797 Descending	FlightAware ADS-B (PHIK)
Mon 05:31:13 AM	21.3252	-158.0918	→ 90°	188.0	216.0	2700.0	-938 Descending	FlightAware ADS-B (PHIK)
Mon 05:31:29 AM	21.3252	-158.0778	→ 90°	179.0	206.0	2475.0	-984 Descending	FlightAware ADS-B (PHNL)
Mon 05:31:45 AM	21.3252	-158.064	→ 90°	174.0	200.0	2175.0	-1,031 Descending	FlightAware ADS-B (JRF / PHJR)
Mon 05:32:01 AM	21.3252	-158.0503	→ 90°	163.0	188.0	1925.0	-891 Descending	FlightAware ADS-B (PHHI)
Mon 05:32:17 AM	21.3252	-158.038	→ 90°	154.0	177.0	1700.0	-750 Descending	FlightAware ADS-B (OGG / PHOG)
Mon 05:32:33 AM	21.3253	-158.0256	→ 89°	153.0	176.0	1525.0	-750 Descending	FlightAware ADS-B (PHNL)
Mon 05:32:49 AM	21.3253	-158.0136	→ 90°	149.0	171.0	1300.0	-797 Descending	FlightAware ADS-B (PHNL)
Mon 05:33:05 AM	21.3252	-158.002	→ 91°	148.0	170.0	1100.0	-797 Descending	FlightAware ADS-B (PHNL)
Mon 05:33:21 AM	21.3251	-157.9899	→ 90°	147.0	169.0	875.0	-750 Descending	FlightAware ADS-B (PHIK)
Mon 05:33:37 AM	21.3252	-157.9789	→ 89°	146.0	168.0	700.0	-750 Descending	FlightAware ADS-B (PHNL)
Mon 05:33:53 AM	21.3253	-157.9667	→ 90°	148.0	170.0	475.0	-844 Descending	FlightAware ADS-B (PHNL)
