# Supplementary material for: TrackMatcher – a tool for finding intercepts in tracks of geographical positions
Source: Copernicus journal article supplement (doi:10.5194/gmd-15-7557-2022), 2022-10-18
Supplement: Supplementary file 1 [file gmd-15-7557-2022-supplement.zip › ESM/example/data/flights/UAL201_27-JAN-2019_PHNL-PGUM.dat]

Time (CET)	Latitude	Longitude	Course	kts	mph	feet	Rate	Reporting Facility
Sun 02:22:59 AM	21.3005	-157.899	↘ 133°	202.0	232.0	975.0	Level	FlightAware ADS-B (PHHI)
Sun 02:23:15 AM	21.2866	-157.8909	↓ 162°	216.0	249.0	1400.0	1,359 Climbing	FlightAware ADS-B (OGG / PHOG)
Sun 02:23:31 AM	21.2687	-157.8863	↓ 168°	237.0	273.0	1700.0	1,266 Climbing	FlightAware ADS-B (PHNL)
Sun 02:23:47 AM	21.2532	-157.8838	↓ 179°	251.0	289.0	2075.0	1,955 Climbing	FlightAware ADS-B (PHNL)
Sun 02:24:04 AM	21.2324	-157.8902	↙ 211°	260.0	299.0	2775.0	2,691 Climbing	FlightAware ADS-B (PHNL)
Sun 02:24:21 AM	21.2171	-157.9062	↙ 233°	257.0	296.0	3600.0	1,941 Climbing	FlightAware ADS-B (PHNL)
Sun 02:24:38 AM	21.2076	-157.9239	↙ 244°	271.0	312.0	3875.0	1,533 Climbing	FlightAware ADS-B (PHHI)
Sun 02:25:06 AM	21.1967	-157.9616	← 255°	288.0	331.0	4750.0	2,219 Climbing	FlightAware ADS-B (PHIK)
Sun 02:25:26 AM	21.19	-157.9888	← 256°	286.0	329.0	5650.0	2,122 Climbing	FlightAware ADS-B (PHNL)
Sun 02:25:47 AM	21.1825	-158.018	← 255°	299.0	344.0	6200.0	2,074 Climbing	FlightAware ADS-B (PHNL)
Sun 02:26:13 AM	21.172	-158.0569	← 255°	304.0	350.0	7275.0	2,452 Climbing	FlightAware ADS-B (PHNL)
Sun 02:26:39 AM	21.162	-158.0927	← 254°	306.0	352.0	8325.0	2,107 Climbing	FlightAware ADS-B (PHHI)
Sun 02:26:55 AM	21.1551	-158.1177	← 255°	313.0	360.0	8750.0	2,014 Climbing	FlightAware ADS-B (OGG / PHOG)
Sun 02:27:14 AM	21.1477	-158.1444	← 254°	314.0	361.0	9500.0	2,605 Climbing	FlightAware ADS-B (PHHI)
Sun 02:27:33 AM	21.1397	-158.1738	← 254°	310.0	357.0	10400.0	1,600 Climbing	FlightAware ADS-B (PHNL)
Sun 02:28:14 AM	21.1219	-158.239	← 252°	348.0	400.0	11100.0	1,057 Climbing	FlightAware ADS-B (NGF / PHNG)
Sun 02:28:34 AM	21.1118	-158.2701	← 251°	362.0	417.0	11475.0	1,703 Climbing	FlightAware ADS-B (PHNL)
Sun 02:29:13 AM	21.0899	-158.3379	← 251°	371.0	427.0	12775.0	1,993 Climbing	FlightAware ADS-B (PHHI)
Sun 02:29:47 AM	21.0712	-158.3989	← 252°	379.0	436.0	13900.0	2,147 Climbing	FlightAware ADS-B (PHIK)
Sun 02:30:11 AM	21.0584	-158.4402	← 253°	375.0	432.0	14850.0	2,222 Climbing	FlightAware ADS-B (OGG / PHOG)
Sun 02:30:41 AM	21.0418	-158.4929	← 252°	377.0	434.0	15900.0	1,882 Climbing	FlightAware ADS-B (PHIK)
Sun 02:31:06 AM	21.0279	-158.5373	← 253°	381.0	438.0	16575.0	1,824 Climbing	FlightAware ADS-B (MUE / PHMU)
Sun 02:31:32 AM	21.0133	-158.5839	← 253°	382.0	440.0	17450.0	2,217 Climbing	FlightAware ADS-B (OGG / PHOG)
Sun 02:31:52 AM	21.0021	-158.6201	← 252°	379.0	436.0	18275.0	1,950 Climbing	FlightAware ADS-B (PHNL)
Sun 02:32:32 AM	20.9804	-158.6891	← 252°	382.0	440.0	19400.0	1,586 Climbing	FlightAware ADS-B (OGG / PHOG)
Sun 02:33:02 AM	20.9624	-158.746	← 252°	387.0	445.0	20125.0	1,500 Climbing	FlightAware ADS-B (OGG / PHOG)
Sun 02:33:22 AM	20.9513	-158.7812	← 253°	388.0	447.0	20650.0	1,500 Climbing	FlightAware ADS-B (OGG / PHOG)
Sun 02:34:03 AM	20.9278	-158.8564	← 252°	397.0	457.0	21650.0	1,352 Climbing	FlightAware ADS-B (PHIK)
Sun 02:34:23 AM	20.9158	-158.8947	← 252°	401.0	461.0	22025.0	1,230 Climbing	FlightAware ADS-B (PHNL)
Sun 02:34:53 AM	20.8982	-158.9498	← 251°	407.0	468.0	22675.0	1,125 Climbing	FlightAware ADS-B (KOA / PHKO)
Sun 02:35:23 AM	20.8798	-159.0076	← 251°	417.0	480.0	23150.0	1,025 Climbing	FlightAware ADS-B (PHIK)
Sun 02:35:53 AM	20.8608	-159.067	← 251°	424.0	488.0	23700.0	1,100 Climbing	FlightAware ADS-B (OGG / PHOG)
Sun 02:36:23 AM	20.8411	-159.1285	← 251°	431.0	496.0	24250.0	1,150 Climbing	FlightAware ADS-B (PHIK)
Sun 02:36:53 AM	20.8217	-159.1895	← 251°	436.0	502.0	24850.0	1,300 Climbing	FlightAware ADS-B (PHIK)
Sun 02:37:23 AM	20.8021	-159.2507	← 252°	437.0	503.0	25550.0	1,350 Climbing	FlightAware ADS-B (OGG / PHOG)
Sun 02:37:53 AM	20.7823	-159.3122	← 252°	439.0	505.0	26200.0	1,200 Climbing	FlightAware ADS-B (OGG / PHOG)
Sun 02:38:23 AM	20.7625	-159.374	← 252°	442.0	509.0	26750.0	1,254 Climbing	FlightAware ADS-B (OGG / PHOG)
Sun 02:38:54 AM	20.7419	-159.4384	← 251°	444.0	511.0	27475.0	1,107 Climbing	FlightAware ADS-B (LIH / PHLI)
Sun 02:39:24 AM	20.7224	-159.4993	← 251°	449.0	517.0	27875.0	825 Climbing	FlightAware ADS-B (PHIK)
Sun 02:39:54 AM	20.7021	-159.5622	← 251°	454.0	522.0	28300.0	875 Climbing	FlightAware ADS-B (PHIK)
Sun 02:40:24 AM	20.6814	-159.6264	← 251°	458.0	527.0	28750.0	775 Climbing	FlightAware ADS-B (PHNL)
Sun 02:40:54 AM	20.6605	-159.6914	← 252°	462.0	532.0	29075.0	875 Climbing	FlightAware ADS-B (OGG / PHOG)
Sun 02:41:24 AM	20.6397	-159.756	← 251°	464.0	534.0	29625.0	1,000 Climbing	FlightAware ADS-B (PHIK)
Sun 02:41:54 AM	20.6187	-159.8209	← 251°	467.0	537.0	30075.0	875 Climbing	FlightAware ADS-B (PHNL)
Sun 02:42:24 AM	20.5981	-159.8844	← 251°	468.0	539.0	30500.0	882 Climbing	FlightAware ADS-B (PHNL)
Sun 02:42:45 AM	20.5823	-159.9331	← 251°	469.0	540.0	30825.0	1,029 Climbing	FlightAware ADS-B (LIH / PHLI)
Sun 02:43:15 AM	20.5617	-159.9968	← 251°	468.0	539.0	31375.0	1,350 Climbing	FlightAware ADS-B (PHNL)
Sun 02:43:45 AM	20.5404	-160.0619	← 251°	459.0	528.0	32174.999999999996	1,475 Climbing	FlightAware ADS-B (PHIK)
Sun 02:44:15 AM	20.5201	-160.1245	← 251°	454.0	522.0	32850.0	1,333 Climbing	FlightAware ADS-B (PHNL)
Sun 02:44:39 AM	20.5034	-160.1759	← 252°	448.0	516.0	33375.0	1,221 Climbing	FlightAware ADS-B (KOA / PHKO)
Sun 02:44:58 AM	20.4917	-160.2116	← 252°	445.0	512.0	33725.0	1,208 Climbing	FlightAware ADS-B (MUE / PHMU)
Sun 02:45:15 AM	20.4788	-160.2512	← 251°	442.0	509.0	34100.0	1,224 Climbing	FlightAware ADS-B (PHIK)
Sun 02:45:36 AM	20.4664	-160.2893	← 252°	438.0	504.0	34500.0	1,134 Climbing	FlightAware ADS-B (MUE / PHMU)
Sun 02:45:56 AM	20.4526	-160.3316	← 252°	433.0	498.0	34875.0	890 Climbing	FlightAware ADS-B (OGG / PHOG)
Sun 02:46:35 AM	20.4258	-160.4133	← 251°	432.0	497.0	35375.0	675 Climbing	FlightAware ADS-B (PHIK)
Sun 02:46:56 AM	20.4125	-160.4539	← 252°	432.0	497.0	35550.0	471 Climbing	FlightAware ADS-B (OGG / PHOG)
Sun 02:47:26 AM	20.3928	-160.5141	← 252°	432.0	497.0	35775.0	425 Climbing	FlightAware ADS-B (OGG / PHOG)
Sun 02:47:56 AM	20.3733	-160.5735	← 251°	433.0	498.0	35975.0	200 Climbing	FlightAware ADS-B (PHIK)
Sun 02:48:26 AM	20.353	-160.6352	← 251°	436.0	502.0	35975.0	Level	FlightAware ADS-B (PHIK)
Sun 02:48:56 AM	20.3326	-160.6968	← 251°	437.0	503.0	35975.0	Level	FlightAware ADS-B (PHIK)
Sun 02:49:26 AM	20.3122	-160.7585	← 252°	436.0	502.0	35975.0	24 Climbing	FlightAware ADS-B (OGG / PHOG)
Sun 02:49:59 AM	20.2902	-160.8252	← 251°	437.0	503.0	36000.0	Level	FlightAware ADS-B (PHNL)
Sun 02:50:55 AM	20.2532	-160.9371	← 251°	438.0	504.0	35975.0	Level	FlightAware ADS-B (PHIK)
Sun 02:51:35 AM	20.2255	-161.0204	← 251°	439.0	505.0	36000.0	21 Climbing	FlightAware ADS-B (PHNL)
Sun 02:52:05 AM	20.2055	-161.0804	← 251°	440.0	506.0	36000.0	Level	FlightAware ADS-B (PHNL)
Sun 02:52:52 AM	20.1741	-161.1752	← 251°	440.0	506.0	36000.0	-16 Descending	FlightAware ADS-B (OGG / PHOG)
Sun 02:53:36 AM	20.1441	-161.265	← 251°	441.0	507.0	35975.0	-15 Descending	FlightAware ADS-B (PHNL)
Sun 02:54:35 AM	20.1036	-161.3863	← 251°	443.0	510.0	35975.0	Level	FlightAware ADS-B (PHIK)
Sun 02:55:12 AM	20.0781	-161.4623	← 251°	443.0	510.0	35975.0	Level	FlightAware ADS-B (PHNL)
Sun 02:56:03 AM	20.0429	-161.5671	← 250°	444.0	511.0	35975.0	18 Climbing	FlightAware ADS-B (PHIK)
Sun 02:56:36 AM	20.0205	-161.6339	← 250°	444.0	511.0	36000.0	Level	FlightAware ADS-B (PHIK)
Sun 02:57:06 AM	19.9995	-161.6964	← 250°	444.0	511.0	35975.0	-22 Descending	FlightAware ADS-B (PHIK)
Sun 02:57:43 AM	19.9737	-161.7727	← 250°	444.0	511.0	35975.0	Level	FlightAware ADS-B (PHNL)
Sun 02:58:42 AM	19.9332	-161.8931	← 250°	445.0	512.0	35975.0	10 Climbing	FlightAware ADS-B (PHNL)
Sun 03:00:08 AM	19.8667	-162.05	← 250°	440.0	506.0	36000.0	10 Climbing	Honolulu Center
Sun 03:01:08 AM	19.8167	-162.1833	← 248°	440.0	506.0	36000.0	Level	Honolulu Center
Sun 03:01:19 AM	19.8251	-162.2115	← 251°	446.0	513.0	36000.0	Level	FlightAware ADS-B (OGG / PHOG)
Sun 03:02:20 AM	19.7864	-162.325	← 251°	447.0	514.0	36000.0	-16 Descending	FlightAware ADS-B (OGG / PHOG)
Sun 03:02:50 AM	19.759	-162.4053	← 251°	447.0	514.0	35975.0	Level	FlightAware ADS-B (OGG / PHOG)
Sun 03:04:24 AM	19.6833	-162.5833	← 251°	460.0	529.0	36000.0	2 Climbing	Honolulu Center
Sun 03:13:15 AM	19.45	-163.7167	← 257°	457.0	526.0	36000.0	Level	Oakland Oceanic
Sun 03:15:05 AM	19.3915	-163.9919	← 257°	457.0	526.0	36000.0	Level	FlightAware Transoceanic
Sun 03:16:35 AM	19.3491	-164.1897	← 257°	457.0	526.0	36000.0	Level	FlightAware Transoceanic
Sun 03:18:09 AM	19.3046	-164.3963	← 257°	457.0	526.0	36000.0	Level	FlightAware Transoceanic
Sun 03:19:41 AM	19.2608	-164.5983	← 257°	457.0	526.0	36000.0	Level	FlightAware Transoceanic
Sun 03:21:55 AM	19.1967	-164.8923	← 257°	457.0	526.0	36000.0	Level	FlightAware Transoceanic
Sun 03:23:00 AM	19.1833	-164.95	← 257°	459.0	528.0	36000.0	Level	Oakland Oceanic
Sun 03:32:27 AM	18.9	-166.1833	← 257°	462.0	532.0	36000.0	Level	Oakland Oceanic
Sun 03:34:41 AM	18.82	-166.5379	← 257°	462.0	532.0	36000.0	Level	FlightAware Transoceanic
Sun 03:36:35 AM	18.7629	-166.7889	← 256°	462.0	532.0	36000.0	Level	FlightAware Transoceanic
Sun 03:38:47 AM	18.6964	-167.0794	← 256°	462.0	532.0	36000.0	Level	FlightAware Transoceanic
Sun 03:40:04 AM	18.6574	-167.2488	← 256°	462.0	532.0	36000.0	Level	FlightAware Transoceanic
Sun 03:41:39 AM	18.609	-167.4576	← 256°	462.0	532.0	36000.0	Level	FlightAware Transoceanic
Sun 03:42:13 AM	18.6167	-167.45	← 256°	466.0	536.0	36000.0	Level	Oakland Oceanic
Sun 03:45:08 AM	18.5173	-167.8718	← 256°	466.0	536.0	36000.0	Level	FlightAware Transoceanic
Sun 03:46:18 AM	18.4801	-168.0287	← 256°	466.0	536.0	36000.0	Level	FlightAware Transoceanic
Sun 03:48:04 AM	18.4235	-168.2662	← 256°	466.0	536.0	36000.0	Level	FlightAware Transoceanic
Sun 03:49:23 AM	18.3811	-168.4431	← 256°	466.0	536.0	36000.0	Level	FlightAware Transoceanic
Sun 03:50:32 AM	18.3439	-168.5975	← 256°	466.0	536.0	36000.0	Level	FlightAware Transoceanic
Sun 03:51:35 AM	18.3099	-168.7385	← 256°	466.0	536.0	36000.0	Level	FlightAware Transoceanic
Sun 03:51:40 AM	18.3167	-168.7333	← 255°	467.0	537.0	36000.0	Level	Oakland Oceanic
Sun 03:54:41 AM	18.2232	-169.1112	← 255°	467.0	537.0	36000.0	Level	FlightAware Transoceanic
Sun 03:56:36 AM	18.1559	-169.3811	← 255°	467.0	537.0	36000.0	Level	FlightAware Transoceanic
Sun 03:58:43 AM	18.0811	-169.679	← 255°	467.0	537.0	36000.0	Level	FlightAware Transoceanic
Sun 03:59:55 AM	18.0386	-169.8477	← 255°	467.0	537.0	36000.0	Level	FlightAware Transoceanic
Sun 04:01:24 AM	18.0	-170.0	← 272°	469.0	540.0	36000.0	Level	Oakland Oceanic
Sun 04:05:06 AM	18.0136	-170.5614	← 271°	469.0	540.0	36000.0	Level	FlightAware Transoceanic
Sun 04:06:40 AM	18.0184	-170.776	← 271°	469.0	540.0	36000.0	Level	FlightAware Transoceanic
Sun 04:08:25 AM	18.0235	-171.0156	← 271°	469.0	540.0	36000.0	Level	FlightAware Transoceanic
Sun 04:10:28 AM	18.029	-171.2964	← 271°	469.0	540.0	36000.0	Level	FlightAware Transoceanic
Sun 04:10:52 AM	18.0333	-171.3	← 271°	473.0	544.0	36000.0	Level	Oakland Oceanic
Sun 04:20:28 AM	18.05	-172.6	← 271°	473.0	544.0	36000.0	Level	Oakland Oceanic
Sun 04:22:48 AM	18.0543	-172.9837	← 271°	473.0	544.0	36000.0	Level	FlightAware Transoceanic
Sun 04:24:14 AM	18.0563	-173.1802	← 271°	473.0	544.0	36000.0	Level	FlightAware Transoceanic
Sun 04:26:36 AM	18.059	-173.5045	← 270°	473.0	544.0	36000.0	Level	FlightAware Transoceanic
Sun 04:28:05 AM	18.0604	-173.7078	← 270°	473.0	544.0	36000.0	Level	FlightAware Transoceanic
Sun 04:30:04 AM	18.0667	-173.9	← 270°	475.0	547.0	36000.0	Level	Oakland Oceanic
Sun 04:32:34 AM	18.0681	-174.2559	← 270°	475.0	547.0	36000.0	Level	FlightAware Transoceanic
Sun 04:34:42 AM	18.0687	-174.5517	← 270°	475.0	547.0	36000.0	Level	FlightAware Transoceanic
Sun 04:36:52 AM	18.0689	-174.8522	← 270°	475.0	547.0	36000.0	Level	FlightAware Transoceanic
Sun 04:38:10 AM	18.0688	-175.0324	← 270°	475.0	547.0	36000.0	Level	FlightAware Transoceanic
Sun 04:39:41 AM	18.0667	-175.2333	← 270°	475.0	547.0	36000.0	Level	Oakland Oceanic
Sun 04:41:37 AM	18.0662	-175.4597	← 270°	475.0	547.0	36000.0	Level	FlightAware Transoceanic
Sun 04:43:09 AM	18.0654	-175.6748	← 270°	475.0	547.0	36000.0	Level	FlightAware Transoceanic
Sun 04:45:07 AM	18.0641	-175.9506	← 270°	475.0	547.0	36000.0	Level	FlightAware Transoceanic
Sun 04:47:12 AM	18.0623	-176.2427	← 270°	475.0	547.0	36000.0	Level	FlightAware Transoceanic
Sun 04:49:14 AM	18.0602	-176.5279	← 269°	475.0	547.0	36000.0	Level	FlightAware Transoceanic
Sun 04:49:42 AM	18.05	-176.5667	← 270°	477.0	549.0	36000.0	Level	Oakland Oceanic
Sun 04:51:39 AM	18.0476	-176.931	← 270°	477.0	549.0	36000.0	Level	FlightAware Transoceanic
Sun 04:53:08 AM	18.0459	-177.1347	← 269°	477.0	549.0	36000.0	Level	FlightAware Transoceanic
Sun 04:54:40 AM	18.044	-177.3453	← 269°	477.0	549.0	36000.0	Level	FlightAware Transoceanic
Sun 04:56:36 AM	18.0412	-177.6108	← 269°	477.0	549.0	36000.0	Level	FlightAware Transoceanic
Sun 04:58:30 AM	18.0381	-177.8718	← 269°	477.0	549.0	36000.0	Level	FlightAware Transoceanic
Sun 04:58:53 AM	18.05	-177.9	← 269°	479.0	551.0	36000.0	Level	Oakland Oceanic
Sun 05:00:52 AM	18.045	-178.1614	← 269°	479.0	551.0	36000.0	Level	FlightAware Transoceanic
Sun 05:03:15 AM	18.0381	-178.4951	← 269°	479.0	551.0	36000.0	Level	FlightAware Transoceanic
Sun 05:05:07 AM	18.0324	-178.7565	← 269°	479.0	551.0	36000.0	Level	FlightAware Transoceanic
Sun 05:06:41 AM	18.0272	-178.9758	← 269°	479.0	551.0	36000.0	Level	FlightAware Transoceanic
Sun 05:08:18 AM	18.0217	-179.2021	← 268°	479.0	551.0	36000.0	Level	FlightAware Transoceanic
Sun 05:08:30 AM	18.0167	-179.2333	← 269°	480.0	552.0	36000.0	Level	Oakland Oceanic
Sun 05:11:08 AM	18.0084	-179.6336	← 269°	480.0	552.0	36000.0	Level	FlightAware Transoceanic
Sun 05:13:08 AM	18.0026	-179.8892	← 269°	480.0	552.0	36000.0	Level	FlightAware Transoceanic
Sun 05:14:31 AM	18.0	180.0	← 266°	483.0	556.0	36000.0	Level	Oakland Oceanic
Sun 05:14:41 AM	17.9928	179.9033	← 266°	480.0	552.0	36000.0	Level	FlightAware Transoceanic
Sun 05:16:36 AM	17.9723	179.632	← 265°	483.0	556.0	36000.0	Level	FlightAware Transoceanic
Sun 05:18:21 AM	17.95	179.4333	← 265°	484.0	557.0	36000.0	Level	Oakland Oceanic
Sun 05:20:56 AM	17.9178	179.0181	← 265°	484.0	557.0	36000.0	Level	FlightAware Transoceanic
Sun 05:21:56 AM	17.9067	178.8767	← 265°	484.0	557.0	36000.0	Level	FlightAware Transoceanic
Sun 05:23:04 AM	17.8939	178.7164	← 265°	484.0	557.0	36000.0	Level	FlightAware Transoceanic
Sun 05:25:08 AM	17.8702	178.4243	← 265°	484.0	557.0	36000.0	Level	FlightAware Transoceanic
Sun 05:26:39 AM	17.8526	178.2099	← 265°	484.0	557.0	36000.0	Level	FlightAware Transoceanic
Sun 05:27:41 AM	17.85	178.0833	← 265°	486.0	559.0	36000.0	Level	Oakland Oceanic
Sun 05:37:17 AM	17.7333	176.7333	← 265°	487.0	560.0	36000.0	Level	Oakland Oceanic
Sun 05:39:40 AM	17.6985	176.3576	← 264°	487.0	560.0	36000.0	Level	FlightAware Transoceanic
Sun 05:41:39 AM	17.6722	176.0785	← 264°	487.0	560.0	36000.0	Level	FlightAware Transoceanic
Sun 05:43:11 AM	17.6516	175.8627	← 264°	487.0	560.0	36000.0	Level	FlightAware Transoceanic
Sun 05:45:11 AM	17.6243	175.5814	← 264°	487.0	560.0	36000.0	Level	FlightAware Transoceanic
Sun 05:46:20 AM	17.6085	175.4197	← 264°	487.0	560.0	36000.0	Level	FlightAware Transoceanic
Sun 05:46:54 AM	17.6	175.3667	← 264°	489.0	563.0	36000.0	Level	Oakland Oceanic
Sun 05:50:08 AM	17.556	174.9232	← 264°	489.0	563.0	36000.0	Level	FlightAware Transoceanic
Sun 05:52:36 AM	17.5206	174.5739	← 264°	489.0	563.0	36000.0	Level	FlightAware Transoceanic
Sun 05:54:41 AM	17.4903	174.2791	← 264°	489.0	563.0	36000.0	Level	FlightAware Transoceanic
Sun 05:56:30 AM	17.4667	174.0167	← 264°	489.0	563.0	36000.0	Level	Oakland Oceanic
Sun 05:58:44 AM	17.4261	173.6375	← 264°	489.0	563.0	36000.0	Level	FlightAware Transoceanic
Sun 06:00:04 AM	17.4061	173.4525	← 263°	489.0	563.0	36000.0	Level	FlightAware Transoceanic
Sun 06:01:40 AM	17.3818	173.2305	← 263°	489.0	563.0	36000.0	Level	FlightAware Transoceanic
Sun 06:03:09 AM	17.3591	173.0247	← 263°	489.0	563.0	36000.0	Level	FlightAware Transoceanic
Sun 06:05:08 AM	17.3283	172.7497	← 263°	489.0	563.0	36000.0	610 Climbing	FlightAware Transoceanic
Sun 06:06:06 AM	17.3167	172.6667	← 263°	484.0	557.0	37800.0	543 Climbing	Oakland Oceanic
Sun 06:08:27 AM	17.2778	172.3226	← 263°	484.0	557.0	37800.0	Level	FlightAware Transoceanic
Sun 06:10:09 AM	17.2505	172.0837	← 263°	484.0	557.0	37800.0	Level	FlightAware Transoceanic
Sun 06:11:31 AM	17.2284	171.8917	← 263°	484.0	557.0	37800.0	Level	FlightAware Transoceanic
Sun 06:13:08 AM	17.2019	171.6646	← 263°	484.0	557.0	37800.0	Level	FlightAware Transoceanic
Sun 06:14:43 AM	17.1758	171.4423	← 263°	484.0	557.0	37800.0	73 Climbing	FlightAware Transoceanic
Sun 06:15:52 AM	17.1667	171.3333	← 263°	485.0	558.0	38000.0	51 Climbing	Oakland Oceanic
Sun 06:18:37 AM	17.1191	170.9452	← 263°	485.0	558.0	38000.0	Level	FlightAware Transoceanic
Sun 06:19:42 AM	17.0992	170.7847	← 263°	485.0	558.0	38000.0	Level	FlightAware Transoceanic
Sun 06:21:39 AM	17.0631	170.4959	← 262°	485.0	558.0	38000.0	Level	FlightAware Transoceanic
Sun 06:23:09 AM	17.035	170.2738	← 262°	485.0	558.0	38000.0	Level	FlightAware Transoceanic
Sun 06:25:07 AM	16.9988	169.9839	← 265°	485.0	558.0	38000.0	Level	FlightAware Transoceanic
Sun 06:25:34 AM	17.0	170.0	← 265°	482.0	555.0	38000.0	Level	Oakland Oceanic
Sun 06:25:50 AM	17.0	170.0	← 265°	480.0	552.0	38000.0	Level	Oakland Oceanic
Sun 06:28:09 AM	16.9663	169.5605	← 265°	480.0	552.0	38000.0	Level	FlightAware Transoceanic
Sun 06:30:08 AM	16.9446	169.2838	← 265°	480.0	552.0	38000.0	Level	FlightAware Transoceanic
Sun 06:31:30 AM	16.9295	169.0932	← 265°	480.0	552.0	38000.0	Level	FlightAware Transoceanic
Sun 06:33:25 AM	16.9079	168.826	← 265°	480.0	552.0	38000.0	Level	FlightAware Transoceanic
Sun 06:34:42 AM	16.8933	168.647	← 265°	480.0	552.0	38000.0	Level	FlightAware Transoceanic
Sun 06:35:03 AM	16.9	168.6333	← 265°	481.0	554.0	38000.0	Level	Oakland Oceanic
Sun 06:37:24 AM	16.8718	168.2974	← 265°	481.0	554.0	38000.0	Level	FlightAware Transoceanic
Sun 06:39:42 AM	16.8443	167.9759	← 265°	481.0	554.0	38000.0	Level	FlightAware Transoceanic
Sun 06:41:38 AM	16.8208	167.7057	← 265°	481.0	554.0	38000.0	Level	FlightAware Transoceanic
Sun 06:43:11 AM	16.8016	167.4891	← 265°	481.0	554.0	38000.0	Level	FlightAware Transoceanic
Sun 06:44:31 AM	16.7833	167.2833	← 265°	481.0	554.0	38000.0	Level	Oakland Oceanic
Sun 06:46:18 AM	16.7546	166.9658	← 265°	481.0	554.0	38000.0	Level	FlightAware Transoceanic
Sun 06:48:06 AM	16.7317	166.7176	← 264°	481.0	554.0	38000.0	Level	FlightAware Transoceanic
Sun 06:50:11 AM	16.7049	166.4304	← 264°	481.0	554.0	38000.0	Level	FlightAware Transoceanic
Sun 06:51:31 AM	16.6876	166.2466	← 264°	481.0	554.0	38000.0	Level	FlightAware Transoceanic
Sun 06:53:08 AM	16.6663	166.0239	← 264°	481.0	554.0	38000.0	Level	FlightAware Transoceanic
Sun 06:54:07 AM	16.65	165.95	← 264°	479.0	551.0	38000.0	Level	Oakland Oceanic
Sun 06:56:36 AM	16.6155	165.5891	← 264°	479.0	551.0	38000.0	Level	FlightAware Transoceanic
Sun 06:58:38 AM	16.588	165.307	← 264°	479.0	551.0	38000.0	Level	FlightAware Transoceanic
Sun 06:59:46 AM	16.5726	165.1498	← 264°	479.0	551.0	38000.0	Level	FlightAware Transoceanic
Sun 07:01:39 AM	16.5466	164.8886	← 264°	479.0	551.0	38000.0	Level	FlightAware Transoceanic
Sun 07:02:59 AM	16.5281	164.7038	← 264°	479.0	551.0	38000.0	Level	FlightAware Transoceanic
Sun 07:03:43 AM	16.5167	164.6167	← 264°	478.0	550.0	38000.0	Level	Oakland Oceanic
Sun 07:13:28 AM	16.3833	163.3	← 264°	479.0	551.0	38000.0	Level	Oakland Oceanic
Sun 07:15:37 AM	16.344	162.9396	← 263°	479.0	551.0	38000.0	Level	FlightAware Transoceanic
Sun 07:16:49 AM	16.3258	162.7744	← 263°	479.0	551.0	38000.0	Level	FlightAware Transoceanic
Sun 07:18:52 AM	16.2943	162.4922	← 263°	479.0	551.0	38000.0	Level	FlightAware Transoceanic
Sun 07:20:04 AM	16.2757	162.327	← 263°	479.0	551.0	38000.0	Level	FlightAware Transoceanic
Sun 07:21:38 AM	16.2513	162.1114	← 263°	479.0	551.0	38000.0	Level	FlightAware Transoceanic
Sun 07:22:56 AM	16.2333	161.9833	← 263°	474.0	545.0	38000.0	Level	Oakland Oceanic
Sun 07:25:14 AM	16.1973	161.6663	← 263°	474.0	545.0	38000.0	Level	FlightAware Transoceanic
Sun 07:26:42 AM	16.1734	161.4585	← 263°	474.0	545.0	38000.0	Level	FlightAware Transoceanic
Sun 07:28:05 AM	16.1507	161.2624	← 263°	474.0	545.0	38000.0	Level	FlightAware Transoceanic
Sun 07:30:28 AM	16.1111	160.9248	← 263°	474.0	545.0	38000.0	Level	FlightAware Transoceanic
Sun 07:31:39 AM	16.0913	160.7572	← 263°	474.0	545.0	38000.0	Level	FlightAware Transoceanic
Sun 07:32:32 AM	16.0833	160.6833	← 263°	475.0	547.0	38000.0	Level	Oakland Oceanic
Sun 07:35:09 AM	16.0311	160.2526	← 263°	475.0	547.0	38000.0	Level	FlightAware Transoceanic
Sun 07:36:40 AM	16.0056	160.0455	← 263°	475.0	547.0	38000.0	Level	FlightAware Transoceanic
Sun 07:37:45 AM	15.9922	159.8982	← 265°	475.0	547.0	38000.0	Level	FlightAware Transoceanic
Sun 07:37:49 AM	16.0	160.0	← 265°	476.0	548.0	38000.0	Level	Oakland Oceanic
Sun 07:39:41 AM	15.9717	159.6358	← 265°	476.0	548.0	38000.0	Level	FlightAware Transoceanic
Sun 07:42:03 AM	15.9462	159.3147	← 265°	476.0	548.0	38000.0	Level	FlightAware Transoceanic
Sun 07:42:08 AM	15.95	159.3833	← 265°	477.0	549.0	38000.0	Level	Oakland Oceanic
Sun 07:44:11 AM	15.9261	159.0848	← 265°	477.0	549.0	38000.0	Level	FlightAware Transoceanic
Sun 07:46:41 AM	15.8982	158.7435	← 265°	477.0	549.0	38000.0	Level	FlightAware Transoceanic
Sun 07:48:04 AM	15.8825	158.5547	← 265°	477.0	549.0	38000.0	Level	FlightAware Transoceanic
Sun 07:49:24 AM	15.8673	158.3728	← 265°	477.0	549.0	38000.0	Level	FlightAware Transoceanic
Sun 07:51:19 AM	15.8451	158.1112	← 265°	477.0	549.0	38000.0	Level	FlightAware Transoceanic
Sun 07:51:53 AM	15.85	158.0667	← 265°	477.0	549.0	38000.0	Level	Oakland Oceanic
Sun 07:54:39 AM	15.8181	157.7033	← 265°	477.0	549.0	38000.0	Level	FlightAware Transoceanic
Sun 07:56:47 AM	15.792	157.4106	← 265°	477.0	549.0	38000.0	Level	FlightAware Transoceanic
Sun 07:58:11 AM	15.7747	157.2186	← 265°	477.0	549.0	38000.0	Level	FlightAware Transoceanic
Sun 07:59:43 AM	15.7555	157.0083	← 265°	477.0	549.0	38000.0	Level	FlightAware Transoceanic
Sun 08:01:21 AM	15.7333	156.75	← 264°	477.0	549.0	38000.0	Level	Oakland Oceanic
Sun 08:03:56 AM	15.6959	156.3527	← 264°	477.0	549.0	38000.0	Level	FlightAware Transoceanic
Sun 08:05:08 AM	15.6805	156.1902	← 264°	477.0	549.0	38000.0	Level	FlightAware Transoceanic
Sun 08:06:38 AM	15.6609	155.9872	← 264°	477.0	549.0	38000.0	Level	FlightAware Transoceanic
Sun 08:08:09 AM	15.641	155.7819	← 264°	477.0	549.0	38000.0	Level	FlightAware Transoceanic
Sun 08:09:24 AM	15.6244	155.6128	← 264°	477.0	549.0	38000.0	Level	FlightAware Transoceanic
Sun 08:10:56 AM	15.6	155.4333	← 264°	481.0	554.0	38000.0	Level	Oakland Oceanic
Sun 08:13:08 AM	15.5706	155.135	← 264°	481.0	554.0	38000.0	Level	FlightAware Transoceanic
Sun 08:15:15 AM	15.541	154.8395	← 264°	481.0	554.0	38000.0	Level	FlightAware Transoceanic
Sun 08:16:36 AM	15.522	154.651	← 264°	481.0	554.0	38000.0	Level	FlightAware Transoceanic
Sun 08:17:39 AM	15.507	154.5044	← 264°	481.0	554.0	38000.0	Level	FlightAware Transoceanic
Sun 08:19:41 AM	15.4778	154.2207	← 264°	481.0	554.0	38000.0	Level	FlightAware Transoceanic
Sun 08:20:33 AM	15.4667	154.1	← 264°	482.0	555.0	38000.0	Level	Oakland Oceanic
Sun 08:22:22 AM	15.4326	153.7759	← 264°	482.0	555.0	38000.0	Level	FlightAware Transoceanic
Sun 08:25:07 AM	15.3924	153.3995	← 264°	482.0	555.0	38000.0	Level	FlightAware Transoceanic
Sun 08:26:38 AM	15.3699	153.1919	← 264°	482.0	555.0	38000.0	Level	FlightAware Transoceanic
Sun 08:28:09 AM	15.3473	152.9844	← 264°	482.0	555.0	38000.0	Level	FlightAware Transoceanic
Sun 08:30:09 AM	15.3167	152.7833	← 264°	488.0	562.0	38000.0	Level	Oakland Oceanic
Sun 08:31:53 AM	15.2883	152.5206	← 264°	488.0	562.0	38000.0	Level	FlightAware Transoceanic
Sun 08:33:23 AM	15.2655	152.3116	← 264°	488.0	562.0	38000.0	Level	FlightAware Transoceanic
Sun 08:35:09 AM	15.2384	152.0656	← 263°	488.0	562.0	38000.0	Level	FlightAware Transoceanic
Sun 08:36:36 AM	15.216	151.8637	← 263°	488.0	562.0	38000.0	Level	FlightAware Transoceanic
Sun 08:38:12 AM	15.191	151.641	← 263°	488.0	562.0	38000.0	Level	FlightAware Transoceanic
Sun 08:39:40 AM	15.1679	151.4368	← 263°	488.0	562.0	38000.0	Level	FlightAware Transoceanic
Sun 08:39:45 AM	15.1667	151.4333	← 263°	488.0	562.0	38000.0	Level	Oakland Oceanic
Sun 08:41:40 AM	15.1395	151.194	← 263°	488.0	562.0	38000.0	Level	FlightAware Transoceanic
Sun 08:43:27 AM	15.1102	150.9384	← 263°	488.0	562.0	38000.0	Level	FlightAware Transoceanic
Sun 08:45:06 AM	15.0828	150.7019	← 263°	488.0	562.0	38000.0	Level	FlightAware Transoceanic
Sun 08:46:42 AM	15.056	150.4726	← 263°	488.0	562.0	38000.0	Level	FlightAware Transoceanic
Sun 08:48:12 AM	15.0307	150.2578	← 263°	488.0	562.0	38000.0	Level	FlightAware Transoceanic
Sun 08:49:21 AM	15.0167	150.1167	← 262°	489.0	563.0	38000.0	Level	Oakland Oceanic
Sun 08:50:19 AM	15.0	150.0	← 263°	485.0	558.0	38000.0	Level	Oakland Oceanic
Sun 08:52:19 AM	14.9619	149.6633	← 263°	485.0	558.0	38000.0	Level	FlightAware Transoceanic
Sun 08:53:27 AM	14.943	149.4986	← 263°	485.0	558.0	38000.0	Level	FlightAware Transoceanic
Sun 08:55:32 AM	14.9081	149.196	← 263°	485.0	558.0	38000.0	Level	FlightAware Transoceanic
Sun 08:58:26 AM	14.8333	148.8667	↙ 243°	490.0	564.0	38000.0	Level	Guam Center
Sun 08:59:26 AM	14.8	148.7333	← 256°	480.0	552.0	38000.0	Level	Guam Center
Sun 09:00:26 AM	14.75	148.6	← 249°	490.0	564.0	38000.0	Level	Guam Center
Sun 09:01:26 AM	14.7	148.4667	← 249°	490.0	564.0	38000.0	Level	Guam Center
Sun 09:02:26 AM	14.65	148.3333	← 249°	480.0	552.0	38000.0	Level	Guam Center
Sun 09:03:26 AM	14.6167	148.2167	← 254°	490.0	564.0	38000.0	Level	Guam Center
Sun 09:04:26 AM	14.5667	148.0833	← 249°	480.0	552.0	38000.0	Level	Guam Center
Sun 09:05:26 AM	14.5167	147.95	← 249°	490.0	564.0	38000.0	Level	Guam Center
Sun 09:06:26 AM	14.4667	147.8167	← 249°	490.0	564.0	38000.0	-16 Descending	Guam Center
Sun 09:06:59 AM	14.4431	147.7459	← 249°	488.0	562.0	37975.0	Level	FlightAware ADS-B (PGUM)
Sun 09:07:59 AM	14.3942	147.6148	← 249°	488.0	562.0	38000.0	16 Climbing	FlightAware ADS-B (PGUM)
Sun 09:08:30 AM	14.3697	147.549	← 249°	488.0	562.0	38000.0	Level	FlightAware ADS-B (PGUM)
Sun 09:09:04 AM	14.3423	147.4755	← 249°	487.0	560.0	38000.0	-17 Descending	FlightAware ADS-B (PGUM)
Sun 09:09:59 AM	14.2975	147.3558	← 249°	488.0	562.0	37975.0	-18 Descending	FlightAware ADS-B (PGUM)
Sun 09:10:29 AM	14.2729	147.2901	← 249°	488.0	562.0	37975.0	25 Climbing	FlightAware ADS-B (PGUM)
Sun 09:10:59 AM	14.2485	147.2252	← 249°	490.0	564.0	38000.0	25 Climbing	FlightAware ADS-B (PGUM)
Sun 09:11:29 AM	14.2237	147.1589	← 249°	490.0	564.0	38000.0	-17 Descending	FlightAware ADS-B (PGUM)
Sun 09:12:28 AM	14.1765	147.0332	← 249°	489.0	563.0	37975.0	-16 Descending	FlightAware ADS-B (PGUM)
Sun 09:13:00 AM	14.1502	146.9633	← 249°	489.0	563.0	37975.0	Level	FlightAware ADS-B (PGUM)
Sun 09:13:49 AM	14.1102	146.8573	← 249°	488.0	562.0	37975.0	-114 Descending	FlightAware ADS-B (PGUM)
Sun 09:14:19 AM	14.0861	146.7935	← 249°	485.0	558.0	37825.0	-825 Descending	FlightAware ADS-B (PGUM)
Sun 09:14:49 AM	14.0612	146.7275	← 249°	486.0	559.0	37150.0	-1,350 Descending	FlightAware ADS-B (PGUM)
Sun 09:15:19 AM	14.0367	146.6623	← 249°	488.0	562.0	36475.0	-1,400 Descending	FlightAware ADS-B (PGUM)
Sun 09:15:49 AM	14.0122	146.5974	← 249°	490.0	564.0	35750.0	-1,325 Descending	FlightAware ADS-B (PGUM)
Sun 09:16:19 AM	13.9875	146.5324	← 249°	490.0	564.0	35150.0	-1,225 Descending	FlightAware ADS-B (PGUM)
Sun 09:16:49 AM	13.9629	146.4676	← 249°	487.0	560.0	34525.0	-2,075 Descending	FlightAware ADS-B (PGUM)
Sun 09:17:19 AM	13.9378	146.4017	← 249°	487.0	560.0	33075.0	-3,075 Descending	FlightAware ADS-B (PGUM)
Sun 09:17:49 AM	13.9132	146.3366	← 249°	493.0	567.0	31450.0	-2,975 Descending	FlightAware ADS-B (PGUM)
Sun 09:18:19 AM	13.8885	146.2717	← 249°	489.0	563.0	30100.0	-2,508 Descending	FlightAware ADS-B (PGUM)
Sun 09:18:50 AM	13.8638	146.2067	← 249°	482.0	555.0	28900.0	-2,361 Descending	FlightAware ADS-B (PGUM)
Sun 09:19:20 AM	13.8392	146.1423	← 249°	475.0	547.0	27700.0	-2,375 Descending	FlightAware ADS-B (PGUM)
Sun 09:19:50 AM	13.8154	146.0797	← 249°	468.0	539.0	26525.0	-2,375 Descending	FlightAware ADS-B (PGUM)
Sun 09:20:20 AM	13.7916	146.0175	← 249°	462.0	532.0	25325.0	-2,350 Descending	FlightAware ADS-B (UAM / PGUA)
Sun 09:20:50 AM	13.7683	145.9562	← 249°	455.0	524.0	24175.0	-2,275 Descending	FlightAware ADS-B (UAM / PGUA)
Sun 09:21:20 AM	13.7457	145.897	← 249°	449.0	517.0	23050.0	-2,275 Descending	FlightAware ADS-B (UAM / PGUA)
Sun 09:21:50 AM	13.7228	145.8372	← 249°	442.0	509.0	21900.0	-2,325 Descending	FlightAware ADS-B (UAM / PGUA)
Sun 09:22:20 AM	13.7003	145.7784	← 249°	436.0	502.0	20725.0	-2,300 Descending	FlightAware ADS-B (UAM / PGUA)
Sun 09:22:50 AM	13.6788	145.7222	← 249°	430.0	495.0	19600.0	-2,238 Descending	FlightAware ADS-B (UAM / PGUA)
Sun 09:23:21 AM	13.6565	145.6641	← 249°	424.0	488.0	18450.0	-1,992 Descending	FlightAware ADS-B (UAM / PGUA)
Sun 09:23:51 AM	13.6349	145.6081	← 249°	408.0	470.0	17575.0	-2,075 Descending	FlightAware ADS-B (UAM / PGUA)
Sun 09:24:21 AM	13.6146	145.5553	← 249°	398.0	458.0	16375.0	-2,550 Descending	FlightAware ADS-B (UAM / PGUA)
Sun 09:24:51 AM	13.5944	145.5026	← 248°	395.0	455.0	15025.0	-2,475 Descending	FlightAware ADS-B (UAM / PGUA)
Sun 09:25:21 AM	13.5742	145.4499	← 249°	389.0	448.0	13900.0	-2,225 Descending	FlightAware ADS-B (UAM / PGUA)
Sun 09:25:51 AM	13.5545	145.3986	← 248°	384.0	442.0	12800.0	-2,200 Descending	FlightAware ADS-B (UAM / PGUA)
Sun 09:26:21 AM	13.5349	145.3479	← 249°	379.0	436.0	11700.0	-2,075 Descending	FlightAware ADS-B (UAM / PGUA)
Sun 09:26:51 AM	13.5156	145.2979	← 249°	372.0	428.0	10725.0	-1,141 Descending	FlightAware ADS-B (UAM / PGUA)
Sun 09:27:32 AM	13.4932	145.2397	← 249°	337.0	388.0	10350.0	-545 Descending	FlightAware ADS-B (UAM / PGUA)
Sun 09:27:57 AM	13.4775	145.1989	← 249°	319.0	367.0	10125.0	-791 Descending	FlightAware ADS-B (PGUM)
Sun 09:28:27 AM	13.4619	145.1585	← 249°	305.0	351.0	9625.0	-1,132 Descending	FlightAware ADS-B (PGUM)
Sun 09:28:50 AM	13.4497	145.127	← 249°	300.0	345.0	9125.0	-1,500 Descending	FlightAware ADS-B (UAM / PGUA)
Sun 09:29:15 AM	13.4367	145.0934	← 249°	300.0	345.0	8425.0	-1,555 Descending	FlightAware ADS-B (PGUM)
Sun 09:29:45 AM	13.4218	145.0547	← 248°	298.0	343.0	7700.0	-1,410 Descending	FlightAware ADS-B (UAM / PGUA)
Sun 09:30:05 AM	13.4111	145.0275	← 249°	298.0	343.0	7250.0	-1,378 Descending	FlightAware ADS-B (UAM / PGUA)
Sun 09:30:22 AM	13.4029	145.0059	← 249°	297.0	342.0	6850.0	-1,371 Descending	FlightAware ADS-B (PGUM)
Sun 09:30:40 AM	13.3933	144.9812	← 249°	295.0	339.0	6450.0	-1,227 Descending	FlightAware ADS-B (PGUM)
Sun 09:31:06 AM	13.3807	144.9485	← 250°	290.0	334.0	5950.0	-1,133 Descending	FlightAware ADS-B (UAM / PGUA)
Sun 09:31:25 AM	13.3739	144.923	← 259°	287.0	330.0	5600.0	-1,317 Descending	FlightAware ADS-B (UAM / PGUA)
Sun 09:31:47 AM	13.3684	144.8941	← 259°	286.0	329.0	5050.0	-1,350 Descending	FlightAware ADS-B (PGUM)
Sun 09:32:05 AM	13.364	144.8701	← 260°	284.0	327.0	4700.0	-1,364 Descending	FlightAware ADS-B (UAM / PGUA)
Sun 09:32:31 AM	13.3579	144.8365	← 261°	266.0	306.0	4050.0	-1,200 Descending	FlightAware ADS-B (UAM / PGUA)
Sun 09:32:55 AM	13.3525	144.8078	← 260°	243.0	280.0	3700.0	-1,133 Descending	FlightAware ADS-B (UAM / PGUA)
Sun 09:33:20 AM	13.35	144.7801	← 268°	234.0	269.0	3125.0	-1,213 Descending	FlightAware ADS-B (PGUM)
Sun 09:33:42 AM	13.3493	144.7556	← 269°	232.0	267.0	2750.0	-829 Descending	FlightAware ADS-B (PGUM)
Sun 09:33:58 AM	13.3489	144.7373	← 268°	235.0	270.0	2600.0	-130 Descending	FlightAware ADS-B (PGUM)
Sun 09:34:28 AM	13.3482	144.7048	← 269°	232.0	267.0	2650.0	65 Climbing	FlightAware ADS-B (UAM / PGUA)
Sun 09:34:44 AM	13.3479	144.6867	← 269°	233.0	268.0	2650.0	-42 Descending	FlightAware ADS-B (PGUM)
Sun 09:35:04 AM	13.3522	144.6668	← 303°	208.0	239.0	2625.0	-31 Descending	FlightAware ADS-B (UAM / PGUA)
Sun 09:35:33 AM	13.3728	144.6502	↖ 328°	186.0	214.0	2625.0	Level	FlightAware ADS-B (UAM / PGUA)
Sun 09:35:49 AM	13.3841	144.6434	↖ 336°	184.0	212.0	2625.0	41 Climbing	FlightAware ADS-B (UAM / PGUA)
Sun 09:36:10 AM	13.4016	144.6447	↗ 24°	177.0	204.0	2650.0	Level	FlightAware ADS-B (PGUM)
Sun 09:36:31 AM	13.4154	144.6532	↗ 39°	165.0	190.0	2625.0	-120 Descending	FlightAware ADS-B (UAM / PGUA)
Sun 09:37:00 AM	13.4276	144.6718	→ 66°	152.0	175.0	2550.0	-300 Descending	FlightAware ADS-B (PGUM)
Sun 09:37:16 AM	13.4319	144.6817	↗ 65°	141.0	162.0	2400.0	-574 Descending	FlightAware ADS-B (UAM / PGUA)
Sun 09:37:34 AM	13.437	144.6925	↗ 64°	136.0	157.0	2225.0	-706 Descending	FlightAware ADS-B (PGUM)
Sun 09:37:50 AM	13.4413	144.7021	→ 66°	138.0	159.0	2000.0	-783 Descending	FlightAware ADS-B (PGUM)
Sun 09:38:20 AM	13.4496	144.7198	↗ 65°	134.0	154.0	1625.0	-750 Descending	FlightAware ADS-B (PGUM)
Sun 09:38:38 AM	13.4544	144.7304	↗ 65°	136.0	157.0	1400.0	-686 Descending	FlightAware ADS-B (UAM / PGUA)
Sun 09:38:55 AM	13.4588	144.7401	→ 66°	135.0	155.0	1225.0	-591 Descending	FlightAware ADS-B (UAM / PGUA)
Sun 09:39:11 AM	13.463	144.7492	↗ 65°	132.0	152.0	1075.0	-703 Descending	FlightAware ADS-B (UAM / PGUA)
Sun 09:39:27 AM	13.4672	144.7585	↗ 65°	133.0	153.0	850.0	-844 Descending	FlightAware ADS-B (PGUM)
