# Supplementary material for: TrackMatcher – a tool for finding intercepts in tracks of geographical positions
Source: Copernicus journal article supplement (doi:10.5194/gmd-15-7557-2022), 2022-10-18
Supplement: Supplementary file 1 [file gmd-15-7557-2022-supplement.zip › ESM/example/data/flights/VOZ120_27-JAN-2019_NZDN-YBBN.dat]

Time (CET)	Latitude	Longitude	Course	kts	mph	feet	Rate	Reporting Facility
Sun 08:00:56 PM	-45.9353	170.1842	↙ 237°	163.0	188.0	450.0	Level	FlightAware ADS-B (DUD / NZDN)
Sun 08:01:12 PM	-45.9423	170.1686	↙ 237°	159.0	183.0	1425.0	2,813 Climbing	FlightAware ADS-B (NZDC)
Sun 08:01:28 PM	-45.9486	170.1547	↙ 237°	169.0	194.0	1950.0	1,591 Climbing	FlightAware ADS-B (NZDC)
Sun 08:01:45 PM	-45.9572	170.1361	↙ 236°	201.0	231.0	2300.0	1,636 Climbing	FlightAware ADS-B (DUD / NZDN)
Sun 08:02:01 PM	-45.9661	170.1173	↙ 236°	223.0	257.0	2850.0	2,750 Climbing	FlightAware ADS-B (NZDH)
Sun 08:02:21 PM	-45.9782	170.0915	↙ 236°	233.0	268.0	3950.0	3,349 Climbing	FlightAware ADS-B (NZDH)
Sun 08:02:44 PM	-45.9898	170.067	↙ 237°	238.0	274.0	5250.0	3,385 Climbing	FlightAware ADS-B (DUD / NZDN)
Sun 08:03:00 PM	-46.0024	170.0405	↙ 236°	250.0	288.0	6150.0	3,717 Climbing	FlightAware ADS-B (DUD / NZDN)
Sun 08:03:30 PM	-46.0221	169.9987	↙ 237°	249.0	287.0	8100.0	3,815 Climbing	FlightAware ADS-B (DUD / NZDN)
Sun 08:03:46 PM	-46.0279	169.9743	← 262°	240.0	276.0	9075.0	3,083 Climbing	FlightAware ADS-B (NZDH)
Sun 08:04:06 PM	-46.0246	169.9454	← 292°	242.0	278.0	9950.0	2,524 Climbing	FlightAware ADS-B (DUD / NZDN)
Sun 08:04:27 PM	-46.0068	169.9161	↖ 325°	281.0	323.0	10800.0	2,029 Climbing	FlightAware ADS-B (ALR / NZLX)
Sun 08:04:57 PM	-45.971	169.8865	↖ 331°	312.0	359.0	11675.0	2,489 Climbing	FlightAware ADS-B (DUD / NZDN)
Sun 08:05:14 PM	-45.9502	169.8691	↖ 330°	317.0	365.0	12750.0	3,500 Climbing	FlightAware ADS-B (NZDC)
Sun 08:05:39 PM	-45.9181	169.8425	↖ 330°	321.0	369.0	14125.0	2,732 Climbing	FlightAware ADS-B (DUD / NZDN)
Sun 08:06:10 PM	-45.8785	169.8088	↖ 326°	336.0	387.0	15300.0	2,087 Climbing	FlightAware ADS-B (NZTL)
Sun 08:06:48 PM	-45.8306	169.7534	↖ 322°	349.0	402.0	16525.0	2,338 Climbing	FlightAware ADS-B (DUD / NZDN)
Sun 08:07:18 PM	-45.7929	169.7097	↖ 322°	352.0	405.0	17950.0	2,700 Climbing	FlightAware ADS-B (DUD / NZDN)
Sun 08:07:48 PM	-45.7548	169.6653	↖ 322°	361.0	415.0	19225.0	2,425 Climbing	FlightAware ADS-B (DUD / NZDN)
Sun 08:08:18 PM	-45.7151	169.6191	↖ 322°	364.0	419.0	20375.0	2,525 Climbing	FlightAware ADS-B (DUD / NZDN)
Sun 08:08:48 PM	-45.6758	169.5738	↖ 322°	361.0	415.0	21750.0	2,754 Climbing	FlightAware ADS-B (DUD / NZDN)
Sun 08:09:19 PM	-45.6368	169.5288	↖ 322°	356.0	410.0	23175.0	2,486 Climbing	FlightAware ADS-B (DUD / NZDN)
Sun 08:09:58 PM	-45.5865	169.4704	↖ 322°	358.0	412.0	24650.0	1,957 Climbing	FlightAware ADS-B (DUD / NZDN)
Sun 08:10:28 PM	-45.5474	169.4255	↖ 321°	365.0	420.0	25425.0	1,426 Climbing	FlightAware ADS-B (DUD / NZDN)
Sun 08:10:59 PM	-45.5067	169.3789	↖ 322°	374.0	430.0	26100.0	1,623 Climbing	FlightAware ADS-B (DUD / NZDN)
Sun 08:11:29 PM	-45.4669	169.3335	↖ 322°	372.0	428.0	27075.0	2,375 Climbing	FlightAware ADS-B (DUD / NZDN)
Sun 08:11:59 PM	-45.4267	169.2875	↖ 322°	360.0	414.0	28475.0	2,475 Climbing	FlightAware ADS-B (DUD / NZDN)
Sun 08:12:29 PM	-45.3882	169.2433	↖ 321°	358.0	412.0	29550.0	1,984 Climbing	FlightAware ADS-B (TIU / NZTU)
Sun 08:13:01 PM	-45.3464	169.1955	↖ 321°	356.0	410.0	30525.0	1,597 Climbing	FlightAware ADS-B (NZJC)
Sun 08:13:31 PM	-45.3074	169.1511	↖ 321°	361.0	415.0	31200.0	1,200 Climbing	FlightAware ADS-B (NZJC)
Sun 08:14:01 PM	-45.2682	169.1065	↖ 321°	370.0	426.0	31725.0	1,200 Climbing	FlightAware ADS-B (NZJC)
Sun 08:14:31 PM	-45.2277	169.0607	↖ 321°	371.0	427.0	32400.0	1,150 Climbing	FlightAware ADS-B (NZJC)
Sun 08:15:01 PM	-45.187	169.0146	↖ 321°	375.0	432.0	32875.0	1,156 Climbing	FlightAware ADS-B (DUD / NZDN)
Sun 08:15:32 PM	-45.1463	168.9686	↖ 321°	381.0	438.0	33575.0	1,377 Climbing	FlightAware ADS-B (NZJC)
Sun 08:16:02 PM	-45.1027	168.9194	↖ 322°	384.0	442.0	34275.0	1,300 Climbing	FlightAware ADS-B (ALR / NZLX)
Sun 08:16:32 PM	-45.0635	168.8755	↖ 322°	383.0	441.0	34875.0	1,250 Climbing	FlightAware ADS-B (NZJC)
Sun 08:17:02 PM	-45.0221	168.8292	↖ 322°	382.0	440.0	35525.0	1,254 Climbing	FlightAware ADS-B (NZJC)
Sun 08:17:33 PM	-44.9778	168.7795	↖ 322°	382.0	440.0	36150.0	1,185 Climbing	FlightAware ADS-B (NZDC)
Sun 08:18:04 PM	-44.9353	168.7319	↖ 322°	379.0	436.0	36750.0	1,057 Climbing	FlightAware ADS-B (DUD / NZDN)
Sun 08:18:34 PM	-44.8942	168.6862	↖ 322°	379.0	436.0	37225.0	875 Climbing	FlightAware ADS-B (IVC / NZNV)
Sun 08:19:04 PM	-44.8523	168.6394	↖ 322°	381.0	438.0	37625.0	800 Climbing	FlightAware ADS-B (DUD / NZDN)
Sun 08:19:34 PM	-44.8106	168.5931	↖ 322°	386.0	444.0	38025.0	369 Climbing	FlightAware ADS-B (DUD / NZDN)
Sun 08:20:05 PM	-44.767	168.5447	↖ 322°	389.0	448.0	38000.0	-49 Descending	FlightAware ADS-B (IVC / NZNV)
Sun 08:20:35 PM	-44.7259	168.4992	↖ 322°	387.0	445.0	37975.0	Level	FlightAware ADS-B (NZJS)
Sun 08:21:06 PM	-44.6823	168.4509	↖ 322°	385.0	443.0	38000.0	24 Climbing	FlightAware ADS-B (ALR / NZLX)
Sun 08:21:37 PM	-44.6407	168.4049	↖ 322°	383.0	441.0	38000.0	Level	FlightAware ADS-B (ASG / NZAS)
Sun 08:22:07 PM	-44.5978	168.3576	↖ 322°	382.0	440.0	38000.0	Level	FlightAware ADS-B (CHC / NZCH)
Sun 08:22:38 PM	-44.5538	168.3093	↖ 322°	382.0	440.0	38000.0	-22 Descending	FlightAware ADS-B (CHC / NZCH)
Sun 08:23:14 PM	-44.5038	168.2544	↖ 322°	385.0	443.0	37975.0	-23 Descending	FlightAware ADS-B (IVC / NZNV)
Sun 08:23:44 PM	-44.462	168.2085	↖ 322°	384.0	442.0	37975.0	25 Climbing	FlightAware ADS-B (IVC / NZNV)
Sun 08:24:14 PM	-44.4198	168.1624	↖ 322°	382.0	440.0	38000.0	25 Climbing	FlightAware ADS-B (DUD / NZDN)
Sun 08:24:44 PM	-44.3785	168.1175	↖ 322°	381.0	438.0	38000.0	-23 Descending	FlightAware ADS-B (DUD / NZDN)
Sun 08:25:18 PM	-44.3322	168.0672	↖ 322°	381.0	438.0	37975.0	Level	FlightAware ADS-B (CHC / NZCH)
Sun 08:25:48 PM	-44.2907	168.022	↖ 322°	379.0	436.0	38000.0	25 Climbing	FlightAware ADS-B (ALR / NZLX)
Sun 08:26:19 PM	-44.2476	167.9753	↖ 322°	378.0	435.0	38000.0	-25 Descending	FlightAware ADS-B (CHC / NZCH)
Sun 08:26:49 PM	-44.2066	167.931	↖ 322°	376.0	433.0	37975.0	Level	FlightAware ADS-B (CHC / NZCH)
Sun 08:27:19 PM	-44.1644	167.8854	↖ 322°	376.0	433.0	38000.0	Level	FlightAware ADS-B (CHC / NZCH)
Sun 08:27:50 PM	-44.1235	167.8412	↖ 322°	375.0	432.0	37975.0	Level	FlightAware ADS-B (CHC / NZCH)
Sun 08:28:22 PM	-44.0798	167.7941	↖ 322°	376.0	433.0	38000.0	24 Climbing	FlightAware ADS-B (NZTZ)
Sun 08:28:52 PM	-44.038	167.7492	↖ 322°	375.0	432.0	38000.0	Level	FlightAware ADS-B (NZTZ)
Sun 08:29:22 PM	-43.9966	167.705	↖ 323°	376.0	433.0	38000.0	-25 Descending	FlightAware ADS-B (NZTZ)
Sun 08:29:52 PM	-43.9556	167.661	↖ 322°	376.0	433.0	37975.0	-25 Descending	FlightAware ADS-B (NZTZ)
Sun 08:30:22 PM	-43.9144	167.6172	↖ 322°	378.0	435.0	37975.0	25 Climbing	FlightAware ADS-B (NZTZ)
Sun 08:30:52 PM	-43.8728	167.5727	↖ 322°	379.0	436.0	38000.0	20 Climbing	FlightAware ADS-B (NZTZ)
Sun 08:31:37 PM	-43.8103	167.5062	↖ 322°	380.0	437.0	38000.0	-188 Descending	FlightAware ADS-B (NZTZ)
Sun 08:32:12 PM	-43.7617	167.4546	↖ 323°	379.0	436.0	37750.0	-692 Descending	FlightAware ADS-B (NZTZ)
Sun 08:32:42 PM	-43.7208	167.4113	↖ 323°	378.0	435.0	37250.0	-1,025 Descending	FlightAware ADS-B (ALR / NZLX)
Sun 08:33:12 PM	-43.6776	167.3655	↖ 323°	378.0	435.0	36725.0	-1,000 Descending	FlightAware ADS-B (NZTZ)
Sun 08:33:42 PM	-43.6361	167.3218	↖ 323°	377.0	434.0	36250.0	-672 Descending	FlightAware ADS-B (NZTZ)
Sun 08:34:19 PM	-43.5861	167.2691	↖ 323°	377.0	434.0	35975.0	-208 Descending	FlightAware ADS-B (NZTZ)
Sun 08:34:54 PM	-43.5387	167.2192	↖ 323°	376.0	433.0	36000.0	18 Climbing	FlightAware ADS-B (ALR / NZLX)
Sun 08:35:44 PM	-43.4677	167.1448	↖ 323°	376.0	433.0	36000.0	Level	FlightAware ADS-B (ALR / NZLX)
Sun 08:36:42 PM	-43.3871	167.0607	↖ 323°	378.0	435.0	36000.0	Level	FlightAware ADS-B (ALR / NZLX)
Sun 08:40:07 PM	-43.1015	166.7528	↖ 321°	386.0	444.0	36000.0	Level	FlightAware ADS-B (ALR / NZLX)
Sun 10:12:35 PM	-34.4303	158.6508	↖ 324°	450.0	518.0	36000.0	Level	Aus ATC (ADS-B)
Sun 10:12:50 PM	-34.4044	158.6299	↖ 326°	450.0	518.0	36000.0	Level	Aus ATC (ADS-B)
Sun 10:12:55 PM	-34.3958	158.623	↖ 326°	451.0	519.0	36000.0	Level	Aus ATC (ADS-B)
Sun 10:13:00 PM	-34.3872	158.6161	↖ 326°	450.0	518.0	36000.0	Level	Aus ATC (ADS-B)
Sun 10:13:10 PM	-34.3698	158.6021	↖ 327°	450.0	518.0	36000.0	Level	Aus ATC (ADS-B)
Sun 10:13:15 PM	-34.3613	158.5953	↖ 327°	451.0	519.0	36000.0	Level	Aus ATC (ADS-B)
Sun 10:13:20 PM	-34.3525	158.5882	↖ 328°	451.0	519.0	36000.0	Level	Aus ATC (ADS-B)
Sun 10:13:25 PM	-34.3439	158.5813	↖ 327°	451.0	519.0	36000.0	Level	Aus ATC (ADS-B)
Sun 10:13:39 PM	-34.3178	158.5605	↖ 327°	451.0	519.0	36000.0	Level	Aus ATC (ADS-B)
Sun 10:13:50 PM	-34.3003	158.5466	↖ 326°	452.0	520.0	36000.0	Level	Aus ATC (ADS-B)
Sun 10:14:04 PM	-34.2743	158.5257	↖ 326°	452.0	520.0	36000.0	Level	Aus ATC (ADS-B)
Sun 10:14:14 PM	-34.2569	158.5117	↖ 326°	452.0	520.0	36000.0	Level	Aus ATC (ADS-B)
Sun 10:14:19 PM	-34.2484	158.5048	↖ 325°	452.0	520.0	36000.0	Level	Aus ATC (ADS-B)
Sun 10:14:24 PM	-34.2396	158.4978	↖ 326°	452.0	520.0	36000.0	Level	Aus ATC (ADS-B)
Sun 10:14:34 PM	-34.2222	158.4837	↖ 326°	453.0	521.0	36000.0	Level	Aus ATC (ADS-B)
Sun 10:14:39 PM	-34.2136	158.4769	↖ 326°	453.0	521.0	36000.0	Level	Aus ATC (ADS-B)
Sun 10:14:49 PM	-34.196	158.4628	↖ 326°	453.0	521.0	36000.0	Level	Aus ATC (ADS-B)
Sun 10:15:04 PM	-34.1699	158.442	↖ 326°	454.0	522.0	36000.0	Level	Aus ATC (ADS-B)
Sun 10:15:14 PM	-34.1525	158.428	↖ 326°	453.0	521.0	36000.0	Level	Aus ATC (ADS-B)
Sun 10:15:19 PM	-34.1437	158.421	↖ 327°	453.0	521.0	36000.0	Level	Aus ATC (ADS-B)
Sun 10:15:29 PM	-34.1263	158.4072	↖ 327°	453.0	521.0	36000.0	Level	Aus ATC (ADS-B)
Sun 10:15:34 PM	-34.1175	158.4002	↖ 327°	453.0	521.0	36000.0	Level	Aus ATC (ADS-B)
Sun 10:15:44 PM	-34.1	158.3863	↖ 327°	454.0	522.0	36000.0	Level	Aus ATC (ADS-B)
Sun 10:15:49 PM	-34.0913	158.3794	↖ 328°	455.0	524.0	36000.0	Level	Aus ATC (ADS-B)
Sun 10:15:54 PM	-34.0826	158.3724	↖ 328°	455.0	524.0	36000.0	Level	Aus ATC (ADS-B)
Sun 10:15:59 PM	-34.0738	158.3654	↖ 328°	455.0	524.0	36000.0	Level	Aus ATC (ADS-B)
Sun 10:16:09 PM	-34.0563	158.3515	↖ 327°	455.0	524.0	36000.0	Level	Aus ATC (ADS-B)
Sun 10:16:14 PM	-34.0475	158.3444	↖ 328°	455.0	524.0	36000.0	Level	Aus ATC (ADS-B)
Sun 10:16:19 PM	-34.0388	158.3375	↖ 328°	455.0	524.0	36000.0	Level	Aus ATC (ADS-B)
Sun 10:16:29 PM	-34.0212	158.3235	↖ 326°	455.0	524.0	36000.0	Level	Aus ATC (ADS-B)
Sun 10:16:34 PM	-34.0125	158.3166	↖ 328°	455.0	524.0	36000.0	Level	Aus ATC (ADS-B)
Sun 10:16:44 PM	-33.995	158.3025	↖ 326°	455.0	524.0	36000.0	Level	Aus ATC (ADS-B)
Sun 10:17:54 PM	-33.8726	158.2054	↖ 326°	455.0	524.0	36000.0	Level	Aus ATC (ADS-B)
Sun 10:17:59 PM	-33.8637	158.1983	↖ 328°	454.0	522.0	36000.0	Level	Aus ATC (ADS-B)
Sun 10:18:09 PM	-33.8462	158.1845	↖ 327°	454.0	522.0	36000.0	Level	Aus ATC (ADS-B)
Sun 10:18:24 PM	-33.82	158.1638	↖ 327°	454.0	522.0	36000.0	Level	Aus ATC (ADS-B)
Sun 10:18:34 PM	-33.8025	158.15	↖ 326°	454.0	522.0	36000.0	Level	Aus ATC (ADS-B)
Sun 10:18:39 PM	-33.7936	158.1429	↖ 327°	454.0	522.0	36000.0	Level	Aus ATC (ADS-B)
Sun 10:18:49 PM	-33.7761	158.1291	↖ 327°	454.0	522.0	36000.0	Level	Aus ATC (ADS-B)
Sun 10:18:54 PM	-33.7673	158.1221	↖ 327°	454.0	522.0	36000.0	Level	Aus ATC (ADS-B)
Sun 10:18:59 PM	-33.7586	158.1153	↖ 327°	454.0	522.0	36000.0	Level	Aus ATC (ADS-B)
Sun 10:19:09 PM	-33.7411	158.1014	↖ 327°	454.0	522.0	36000.0	Level	Aus ATC (ADS-B)
Sun 10:19:14 PM	-33.7323	158.0945	↖ 328°	454.0	522.0	36000.0	Level	Aus ATC (ADS-B)
Sun 10:19:49 PM	-33.6709	158.0462	↖ 327°	454.0	522.0	36000.0	Level	Aus ATC (ADS-B)
Sun 10:19:59 PM	-33.6534	158.0324	↖ 327°	454.0	522.0	36000.0	Level	Aus ATC (ADS-B)
Sun 10:20:04 PM	-33.6446	158.0255	↖ 328°	454.0	522.0	36000.0	Level	Aus ATC (ADS-B)
Sun 10:20:14 PM	-33.6272	158.0117	↖ 328°	454.0	522.0	36000.0	Level	Aus ATC (ADS-B)
Sun 10:20:19 PM	-33.6183	158.0048	↖ 326°	454.0	522.0	36000.0	Level	Aus ATC (ADS-B)
Sun 10:20:24 PM	-33.6096	157.9979	↖ 326°	454.0	522.0	36000.0	Level	Aus ATC (ADS-B)
Sun 10:20:34 PM	-33.5921	157.9842	↖ 327°	454.0	522.0	36000.0	Level	Aus ATC (ADS-B)
Sun 10:20:39 PM	-33.5834	157.9774	↖ 328°	454.0	522.0	36000.0	Level	Aus ATC (ADS-B)
Sun 10:20:49 PM	-33.5659	157.9637	↖ 328°	454.0	522.0	36000.0	Level	Aus ATC (ADS-B)
Sun 10:21:04 PM	-33.5397	157.9431	↖ 326°	454.0	522.0	36000.0	Level	Aus ATC (ADS-B)
Sun 10:21:14 PM	-33.522	157.9293	↖ 327°	454.0	522.0	36000.0	Level	Aus ATC (ADS-B)
Sun 10:21:19 PM	-33.5134	157.9225	↖ 328°	454.0	522.0	36000.0	Level	Aus ATC (ADS-B)
Sun 10:21:54 PM	-33.452	157.8744	↖ 327°	454.0	522.0	36000.0	Level	Aus ATC (ADS-B)
Sun 10:21:59 PM	-33.4432	157.8674	↖ 328°	454.0	522.0	36000.0	Level	Aus ATC (ADS-B)
Sun 10:22:04 PM	-33.4345	157.8606	↖ 328°	455.0	524.0	36000.0	Level	Aus ATC (ADS-B)
Sun 10:22:14 PM	-33.4169	157.8467	↖ 326°	455.0	524.0	36000.0	Level	Aus ATC (ADS-B)
Sun 10:22:19 PM	-33.4082	157.84	↖ 326°	455.0	524.0	36000.0	Level	Aus ATC (ADS-B)
Sun 10:22:29 PM	-33.3906	157.8261	↖ 327°	455.0	524.0	36000.0	Level	Aus ATC (ADS-B)
Sun 10:22:39 PM	-33.373	157.8124	↖ 327°	456.0	525.0	36000.0	Level	Aus ATC (ADS-B)
Sun 10:22:54 PM	-33.3466	157.7918	↖ 327°	456.0	525.0	36000.0	Level	Aus ATC (ADS-B)
Sun 10:23:04 PM	-33.329	157.7781	↖ 327°	456.0	525.0	36000.0	Level	Aus ATC (ADS-B)
Sun 10:23:09 PM	-33.3201	157.7711	↖ 327°	456.0	525.0	36000.0	Level	Aus ATC (ADS-B)
Sun 10:23:19 PM	-33.3024	157.7574	↖ 327°	456.0	525.0	36000.0	Level	Aus ATC (ADS-B)
Sun 10:23:24 PM	-33.2937	157.7506	↖ 328°	456.0	525.0	36000.0	Level	Aus ATC (ADS-B)
Sun 10:23:29 PM	-33.2849	157.7438	↖ 325°	456.0	525.0	36000.0	Level	Aus ATC (ADS-B)
Sun 10:23:39 PM	-33.2672	157.73	↖ 327°	456.0	525.0	36000.0	Level	Aus ATC (ADS-B)
Sun 10:23:44 PM	-33.2583	157.7231	↖ 327°	456.0	525.0	36000.0	Level	Aus ATC (ADS-B)
Sun 10:23:54 PM	-33.2406	157.7093	↖ 327°	457.0	526.0	36000.0	Level	Aus ATC (ADS-B)
Sun 10:24:43 PM	-33.152	157.6407	↖ 327°	458.0	527.0	36000.0	Level	Aus ATC (ADS-B)
Sun 10:24:48 PM	-33.1432	157.6338	↖ 326°	458.0	527.0	36000.0	Level	Aus ATC (ADS-B)
Sun 10:24:54 PM	-33.1342	157.6269	↖ 327°	458.0	527.0	36000.0	Level	Aus ATC (ADS-B)
Sun 10:25:04 PM	-33.1166	157.6132	↖ 327°	459.0	528.0	36000.0	Level	Aus ATC (ADS-B)
Sun 10:25:09 PM	-33.1077	157.6063	↖ 328°	459.0	528.0	36000.0	Level	Aus ATC (ADS-B)
Sun 10:25:18 PM	-33.0899	157.5925	↖ 328°	459.0	528.0	36000.0	Level	Aus ATC (ADS-B)
Sun 10:25:33 PM	-33.0633	157.5718	↖ 328°	459.0	528.0	36000.0	Level	Aus ATC (ADS-B)
Sun 10:25:48 PM	-33.0367	157.5512	↖ 327°	459.0	528.0	36000.0	Level	Aus ATC (ADS-B)
Sun 10:25:58 PM	-33.019	157.5375	↖ 327°	459.0	528.0	36000.0	Level	Aus ATC (ADS-B)
Sun 10:26:03 PM	-33.01	157.5305	↖ 329°	459.0	528.0	36000.0	Level	Aus ATC (ADS-B)
Sun 10:26:08 PM	-33.0011	157.5236	↖ 325°	458.0	527.0	36000.0	Level	Aus ATC (ADS-B)
Sun 10:26:58 PM	-32.9122	157.455	↖ 327°	459.0	528.0	36000.0	Level	Aus ATC (ADS-B)
Sun 10:27:43 PM	-32.8321	157.3934	↖ 327°	459.0	528.0	36000.0	Level	Aus ATC (ADS-B)
Sun 10:27:48 PM	-32.8232	157.3867	↖ 329°	459.0	528.0	36000.0	Level	Aus ATC (ADS-B)
Sun 10:27:58 PM	-32.8055	157.3731	↖ 327°	459.0	528.0	36000.0	Level	Aus ATC (ADS-B)
Sun 10:28:03 PM	-32.7964	157.3663	↖ 328°	459.0	528.0	36000.0	Level	Aus ATC (ADS-B)
Sun 10:28:38 PM	-32.7341	157.3184	↖ 327°	460.0	529.0	36000.0	Level	Aus ATC (ADS-B)
Sun 10:29:38 PM	-32.6265	157.2357	↖ 327°	461.0	531.0	36000.0	Level	Aus ATC (ADS-B)
Sun 10:29:53 PM	-32.5998	157.2151	↖ 327°	460.0	529.0	36000.0	Level	Aus ATC (ADS-B)
Sun 10:30:03 PM	-32.582	157.2012	↖ 327°	461.0	531.0	36000.0	Level	Aus ATC (ADS-B)
Sun 10:30:43 PM	-32.5105	157.1463	↖ 327°	463.0	533.0	36000.0	Level	Aus ATC (ADS-B)
Sun 10:30:48 PM	-32.5014	157.1395	↖ 329°	462.0	532.0	36000.0	Level	Aus ATC (ADS-B)
Sun 10:30:53 PM	-32.4926	157.1327	↖ 329°	462.0	532.0	36000.0	Level	Aus ATC (ADS-B)
Sun 10:31:01 PM	-32.4778	157.1215	↖ 327°	462.0	532.0	36000.0	Level	FlightAware ADS-B (YCFS)
Sun 10:31:03 PM	-32.4745	157.119	↖ 323°	462.0	532.0	36000.0	Level	Aus ATC (ADS-B)
Sun 10:31:08 PM	-32.4654	157.1122	↖ 327°	462.0	532.0	36000.0	Level	Aus ATC (ADS-B)
Sun 10:31:18 PM	-32.4475	157.0986	↖ 328°	462.0	532.0	36000.0	Level	Aus ATC (ADS-B)
Sun 10:31:33 PM	-32.4205	157.0781	↖ 327°	463.0	533.0	36000.0	Level	Aus ATC (ADS-B)
Sun 10:31:43 PM	-32.4025	157.0644	↖ 328°	464.0	534.0	36000.0	Level	Aus ATC (ADS-B)
Sun 10:31:48 PM	-32.3935	157.0577	↖ 329°	464.0	534.0	36000.0	Level	Aus ATC (ADS-B)
Sun 10:31:58 PM	-32.3755	157.044	↖ 327°	464.0	534.0	36000.0	Level	Aus ATC (ADS-B)
Sun 10:32:03 PM	-32.3664	157.0371	↖ 327°	464.0	534.0	36000.0	Level	Aus ATC (ADS-B)
Sun 10:32:08 PM	-32.3575	157.0303	↖ 328°	465.0	535.0	36000.0	Level	Aus ATC (ADS-B)
Sun 10:32:18 PM	-32.3392	157.0166	↖ 328°	465.0	535.0	36000.0	Level	Aus ATC (ADS-B)
Sun 10:32:28 PM	-32.3211	157.0029	↖ 327°	465.0	535.0	36000.0	Level	Aus ATC (ADS-B)
Sun 10:32:33 PM	-32.3122	156.9962	↖ 327°	465.0	535.0	36000.0	Level	Aus ATC (ADS-B)
Sun 10:32:43 PM	-32.2941	156.9824	↖ 328°	465.0	535.0	36000.0	Level	Aus ATC (ADS-B)
Sun 10:32:58 PM	-32.267	156.9619	↖ 328°	465.0	535.0	36000.0	Level	Aus ATC (ADS-B)
Sun 10:33:08 PM	-32.249	156.9482	↖ 327°	465.0	535.0	36000.0	Level	Aus ATC (ADS-B)
Sun 10:33:13 PM	-32.2398	156.9414	↖ 329°	465.0	535.0	36000.0	Level	Aus ATC (ADS-B)
Sun 10:33:23 PM	-32.2217	156.9277	↖ 328°	466.0	536.0	36000.0	Level	Aus ATC (ADS-B)
Sun 10:33:28 PM	-32.2126	156.9209	↖ 327°	466.0	536.0	36000.0	Level	Aus ATC (ADS-B)
Sun 10:33:33 PM	-32.2035	156.9141	↖ 327°	466.0	536.0	36000.0	Level	Aus ATC (ADS-B)
Sun 10:33:43 PM	-32.1852	156.9005	↖ 328°	466.0	536.0	36000.0	Level	Aus ATC (ADS-B)
Sun 10:33:48 PM	-32.1763	156.8937	↖ 329°	466.0	536.0	36000.0	Level	Aus ATC (ADS-B)
Sun 10:33:58 PM	-32.1581	156.88	↖ 327°	466.0	536.0	36000.0	Level	Aus ATC (ADS-B)
Sun 10:34:17 PM	-32.1248	156.8546	↖ 327°	467.0	537.0	36000.0	Level	FlightAware ADS-B (YCFS)
Sun 10:34:38 PM	-32.0857	156.825	↖ 327°	467.0	537.0	36000.0	Level	Aus ATC (ADS-B)
Sun 10:34:48 PM	-32.0675	156.8112	↖ 327°	467.0	537.0	36000.0	Level	Aus ATC (ADS-B)
Sun 10:34:53 PM	-32.0584	156.8043	↖ 328°	467.0	537.0	36000.0	Level	Aus ATC (ADS-B)
Sun 10:34:58 PM	-32.0493	156.7974	↖ 328°	468.0	539.0	36000.0	Level	Aus ATC (ADS-B)
Sun 10:35:02 PM	-32.0427	156.7923	↖ 327°	467.0	537.0	36000.0	Level	FlightAware ADS-B (YCFS)
Sun 10:35:08 PM	-32.0312	156.7837	↖ 328°	467.0	537.0	36000.0	Level	Aus ATC (ADS-B)
Sun 10:35:13 PM	-32.022	156.7767	↖ 326°	468.0	539.0	36000.0	Level	Aus ATC (ADS-B)
Sun 10:35:23 PM	-32.0039	156.763	↖ 327°	467.0	537.0	36000.0	Level	Aus ATC (ADS-B)
Sun 10:35:38 PM	-31.9767	156.7426	↖ 328°	468.0	539.0	36000.0	Level	Aus ATC (ADS-B)
Sun 10:35:52 PM	-31.9508	156.7231	↖ 327°	467.0	537.0	36000.0	Level	FlightAware ADS-B (YPLI)
Sun 10:36:36 PM	-31.8692	156.6617	↖ 327°	468.0	539.0	36000.0	Level	FlightAware ADS-B (YCFS)
Sun 10:37:18 PM	-31.818	156.6237	↖ 328°	468.0	539.0	36000.0	Level	FlightAware ADS-B (YCFS)
Sun 10:37:48 PM	-31.7383	156.5645	↖ 328°	467.0	537.0	36000.0	Level	FlightAware ADS-B (YCFS)
Sun 10:38:07 PM	-31.7033	156.5384	↖ 328°	467.0	537.0	36000.0	Level	Aus ATC (ADS-B)
Sun 10:38:17 PM	-31.6851	156.5247	↖ 328°	466.0	536.0	36000.0	Level	Aus ATC (ADS-B)
Sun 10:38:22 PM	-31.6759	156.5178	↖ 326°	466.0	536.0	36000.0	Level	Aus ATC (ADS-B)
Sun 10:38:32 PM	-31.658	156.5042	↖ 327°	466.0	536.0	36000.0	Level	Aus ATC (ADS-B)
Sun 10:38:47 PM	-31.6308	156.4837	↖ 328°	467.0	537.0	36000.0	Level	Aus ATC (ADS-B)
Sun 10:38:57 PM	-31.6124	156.4701	↖ 327°	467.0	537.0	36000.0	Level	Aus ATC (ADS-B)
Sun 10:38:59 PM	-31.6138	156.4712	↖ 327°	467.0	537.0	36000.0	Level	FlightAware ADS-B (YCFS)
Sun 10:39:02 PM	-31.6034	156.4634	↖ 328°	467.0	537.0	36000.0	Level	Aus ATC (ADS-B)
Sun 10:39:12 PM	-31.5852	156.4499	↖ 328°	467.0	537.0	36000.0	Level	Aus ATC (ADS-B)
Sun 10:39:34 PM	-31.5467	156.4214	↖ 328°	467.0	537.0	36000.0	Level	FlightAware ADS-B (YCFS)
Sun 10:39:47 PM	-31.5213	156.4026	↖ 328°	467.0	537.0	36000.0	Level	Aus ATC (ADS-B)
Sun 10:39:57 PM	-31.5031	156.3891	↖ 327°	467.0	537.0	36000.0	Level	Aus ATC (ADS-B)
Sun 10:40:12 PM	-31.4759	156.3689	↖ 328°	467.0	537.0	36000.0	Level	Aus ATC (ADS-B)
Sun 10:40:22 PM	-31.4575	156.3553	↖ 328°	467.0	537.0	36000.0	Level	Aus ATC (ADS-B)
Sun 10:40:27 PM	-31.4484	156.3486	↖ 329°	467.0	537.0	36000.0	Level	Aus ATC (ADS-B)
Sun 10:40:37 PM	-31.4303	156.3351	↖ 327°	467.0	537.0	36000.0	Level	Aus ATC (ADS-B)
Sun 10:40:42 PM	-31.421	156.3283	↖ 328°	467.0	537.0	36000.0	Level	Aus ATC (ADS-B)
Sun 10:40:43 PM	-31.4198	156.3274	↖ 328°	467.0	537.0	36000.0	Level	FlightAware ADS-B (YPLI)
Sun 10:40:52 PM	-31.4028	156.3148	↖ 329°	467.0	537.0	36000.0	Level	Aus ATC (ADS-B)
Sun 10:40:57 PM	-31.3939	156.3082	↖ 327°	467.0	537.0	36000.0	Level	Aus ATC (ADS-B)
Sun 10:41:02 PM	-31.3847	156.3014	↖ 328°	467.0	537.0	36000.0	Level	Aus ATC (ADS-B)
Sun 10:41:12 PM	-31.3664	156.2879	↖ 329°	467.0	537.0	36000.0	Level	Aus ATC (ADS-B)
Sun 10:41:13 PM	-31.3654	156.2872	↖ 328°	467.0	537.0	36000.0	Level	FlightAware ADS-B (YCFS)
Sun 10:41:17 PM	-31.3573	156.2812	↖ 328°	467.0	537.0	36000.0	Level	Aus ATC (ADS-B)
Sun 10:41:27 PM	-31.3391	156.2677	↖ 328°	467.0	537.0	36000.0	Level	Aus ATC (ADS-B)
Sun 10:41:42 PM	-31.3118	156.2473	↖ 327°	467.0	537.0	36000.0	Level	Aus ATC (ADS-B)
Sun 10:41:44 PM	-31.3093	156.2455	↖ 327°	467.0	537.0	36000.0	Level	FlightAware ADS-B (YPLI)
Sun 10:41:52 PM	-31.2937	156.2338	↖ 329°	467.0	537.0	36000.0	Level	Aus ATC (ADS-B)
Sun 10:41:57 PM	-31.2845	156.227	↖ 327°	467.0	537.0	36000.0	Level	Aus ATC (ADS-B)
Sun 10:42:07 PM	-31.2665	156.2135	↖ 327°	467.0	537.0	36000.0	Level	Aus ATC (ADS-B)
Sun 10:42:12 PM	-31.2573	156.2067	↖ 326°	467.0	537.0	36000.0	Level	Aus ATC (ADS-B)
Sun 10:42:14 PM	-31.2536	156.2039	↖ 327°	467.0	537.0	36000.0	Level	FlightAware ADS-B (YPLI)
Sun 10:42:17 PM	-31.2482	156.1998	↖ 326°	468.0	539.0	36000.0	Level	Aus ATC (ADS-B)
Sun 10:42:27 PM	-31.2301	156.1864	↖ 327°	467.0	537.0	36000.0	Level	Aus ATC (ADS-B)
Sun 10:42:37 PM	-31.2118	156.1731	↖ 329°	468.0	539.0	36000.0	Level	Aus ATC (ADS-B)
Sun 10:42:42 PM	-31.2025	156.1664	↖ 329°	467.0	537.0	36000.0	Level	Aus ATC (ADS-B)
Sun 10:42:44 PM	-31.1995	156.164	↖ 328°	467.0	537.0	36000.0	Level	FlightAware ADS-B (YPLI)
Sun 10:42:52 PM	-31.1844	156.1531	↖ 328°	467.0	537.0	36000.0	Level	Aus ATC (ADS-B)
Sun 10:43:07 PM	-31.1568	156.1331	↖ 328°	467.0	537.0	36000.0	Level	Aus ATC (ADS-B)
Sun 10:43:14 PM	-31.1448	156.1242	↖ 328°	467.0	537.0	36000.0	Level	FlightAware ADS-B (YPLI)
Sun 10:43:17 PM	-31.1384	156.1196	↖ 329°	467.0	537.0	36000.0	Level	Aus ATC (ADS-B)
Sun 10:43:22 PM	-31.1294	156.113	↖ 326°	468.0	539.0	36000.0	Level	Aus ATC (ADS-B)
Sun 10:43:32 PM	-31.1111	156.0996	↖ 328°	468.0	539.0	36000.0	Level	Aus ATC (ADS-B)
Sun 10:43:37 PM	-31.1019	156.0928	↖ 326°	468.0	539.0	36000.0	Level	Aus ATC (ADS-B)
Sun 10:43:42 PM	-31.0927	156.0862	↖ 327°	468.0	539.0	36000.0	Level	Aus ATC (ADS-B)
Sun 10:43:45 PM	-31.0869	156.0818	↖ 328°	468.0	539.0	36000.0	Level	FlightAware ADS-B (YCFS)
Sun 10:43:52 PM	-31.0744	156.0727	↖ 327°	467.0	537.0	36000.0	Level	Aus ATC (ADS-B)
Sun 10:44:18 PM	-31.0283	156.0388	↖ 328°	468.0	539.0	36000.0	Level	FlightAware ADS-B (YCFS)
Sun 10:44:51 PM	-30.9684	155.9945	↖ 328°	467.0	537.0	36000.0	Level	FlightAware ADS-B (YCFS)
Sun 10:45:12 PM	-30.9286	155.9652	↖ 327°	467.0	537.0	36000.0	Level	Aus ATC (ADS-B)
Sun 10:45:21 PM	-30.9127	155.9535	↖ 328°	468.0	539.0	36000.0	Level	FlightAware ADS-B (PQQ / YPMQ)
Sun 10:45:22 PM	-30.9103	155.9516	↖ 334°	467.0	537.0	36000.0	Level	Aus ATC (ADS-B)
Sun 10:45:37 PM	-30.8829	155.9317	↖ 328°	467.0	537.0	36000.0	Level	Aus ATC (ADS-B)
Sun 10:45:47 PM	-30.8647	155.9184	↖ 327°	467.0	537.0	36000.0	Level	Aus ATC (ADS-B)
Sun 10:45:51 PM	-30.8576	155.9132	↖ 328°	467.0	537.0	36000.0	Level	FlightAware ADS-B (YCFS)
Sun 10:46:02 PM	-30.8372	155.8982	↖ 328°	467.0	537.0	36000.0	Level	Aus ATC (ADS-B)
Sun 10:46:22 PM	-30.8026	155.8682	↖ 321°	468.0	539.0	36000.0	Level	FlightAware ADS-B (YCFS)
Sun 10:46:47 PM	-30.7604	155.8289	↖ 322°	469.0	540.0	36000.0	Level	Aus ATC (ADS-B)
Sun 10:46:52 PM	-30.7519	155.821	↖ 321°	469.0	540.0	36000.0	Level	Aus ATC (ADS-B)
Sun 10:46:54 PM	-30.7476	155.8171	↖ 321°	469.0	540.0	36000.0	Level	FlightAware ADS-B (YCFS)
Sun 10:47:02 PM	-30.7349	155.8053	↖ 322°	469.0	540.0	36000.0	Level	Aus ATC (ADS-B)
Sun 10:47:17 PM	-30.7094	155.7818	↖ 322°	470.0	541.0	36000.0	Level	Aus ATC (ADS-B)
Sun 10:47:26 PM	-30.6948	155.7683	↖ 322°	469.0	540.0	36000.0	Level	FlightAware ADS-B (PQQ / YPMQ)
Sun 10:47:32 PM	-30.6841	155.7585	↖ 323°	469.0	540.0	36000.0	Level	Aus ATC (ADS-B)
Sun 10:47:42 PM	-30.667	155.7427	↖ 322°	469.0	540.0	36000.0	Level	Aus ATC (ADS-B)
Sun 10:47:47 PM	-30.6586	155.7349	↖ 320°	469.0	540.0	36000.0	Level	Aus ATC (ADS-B)
Sun 10:47:56 PM	-30.6425	155.72	↖ 322°	469.0	540.0	36000.0	Level	FlightAware ADS-B (PQQ / YPMQ)
Sun 10:48:26 PM	-30.5913	155.6729	↖ 321°	470.0	541.0	36000.0	Level	FlightAware ADS-B (PQQ / YPMQ)
Sun 10:48:56 PM	-30.5414	155.6268	↖ 321°	470.0	541.0	36000.0	Level	FlightAware ADS-B (PQQ / YPMQ)
Sun 10:49:11 PM	-30.5145	155.6018	↖ 321°	470.0	541.0	36000.0	Level	Aus ATC (ADS-B)
Sun 10:49:21 PM	-30.4976	155.586	↖ 321°	470.0	541.0	36000.0	Level	Aus ATC (ADS-B)
Sun 10:49:26 PM	-30.49	155.579	↖ 321°	470.0	541.0	36000.0	Level	FlightAware ADS-B (PQQ / YPMQ)
Sun 10:49:36 PM	-30.4721	155.5624	↖ 321°	470.0	541.0	36000.0	Level	Aus ATC (ADS-B)
Sun 10:49:41 PM	-30.4637	155.5546	↖ 323°	470.0	541.0	36000.0	Level	Aus ATC (ADS-B)
Sun 10:49:46 PM	-30.4552	155.5469	↖ 320°	470.0	541.0	36000.0	Level	Aus ATC (ADS-B)
Sun 10:49:56 PM	-30.4395	155.5324	↖ 321°	471.0	542.0	36000.0	Level	FlightAware ADS-B (PQQ / YPMQ)
Sun 10:50:01 PM	-30.4296	155.5232	↖ 323°	471.0	542.0	36000.0	Level	Aus ATC (ADS-B)
Sun 10:50:11 PM	-30.4126	155.5076	↖ 322°	470.0	541.0	36000.0	Level	Aus ATC (ADS-B)
Sun 10:50:26 PM	-30.387	155.4841	↖ 321°	470.0	541.0	36000.0	Level	Aus ATC (ADS-B)
Sun 10:50:27 PM	-30.3865	155.4836	↖ 322°	470.0	541.0	36000.0	Level	FlightAware ADS-B (YCFS)
Sun 10:50:36 PM	-30.3701	155.4685	↖ 321°	470.0	541.0	36000.0	Level	Aus ATC (ADS-B)
Sun 10:50:41 PM	-30.3615	155.4606	↖ 320°	471.0	542.0	36000.0	Level	Aus ATC (ADS-B)
Sun 10:50:51 PM	-30.3445	155.445	↖ 321°	471.0	542.0	36000.0	Level	Aus ATC (ADS-B)
Sun 10:50:56 PM	-30.336	155.4373	↖ 322°	472.0	543.0	36000.0	Level	Aus ATC (ADS-B)
Sun 10:50:57 PM	-30.3347	155.4361	↖ 322°	472.0	543.0	36000.0	Level	FlightAware ADS-B (YCFS)
Sun 10:51:01 PM	-30.3274	155.4294	↖ 322°	472.0	543.0	36000.0	Level	Aus ATC (ADS-B)
Sun 10:51:36 PM	-30.2676	155.3746	↖ 322°	472.0	543.0	36000.0	Level	Aus ATC (ADS-B)
Sun 10:51:41 PM	-30.2592	155.3669	↖ 320°	472.0	543.0	36000.0	Level	Aus ATC (ADS-B)
Sun 10:51:44 PM	-30.2555	155.3635	↖ 322°	472.0	543.0	36000.0	Level	FlightAware ADS-B (BNE / YBBN)
Sun 10:51:51 PM	-30.2421	155.3512	↖ 321°	473.0	544.0	36000.0	Level	Aus ATC (ADS-B)
Sun 10:52:06 PM	-30.2164	155.3278	↖ 322°	472.0	543.0	36000.0	Level	Aus ATC (ADS-B)
Sun 10:52:09 PM	-30.211	155.3229	↖ 323°	471.0	542.0	36000.0	Level	FlightAware ADS-B (BNE / YBBN)
Sun 10:52:16 PM	-30.1993	155.3122	↖ 321°	471.0	542.0	36000.0	Level	Aus ATC (ADS-B)
Sun 10:52:21 PM	-30.1908	155.3044	↖ 322°	472.0	543.0	36000.0	Level	Aus ATC (ADS-B)
Sun 10:52:31 PM	-30.1736	155.2886	↖ 322°	473.0	544.0	36000.0	Level	Aus ATC (ADS-B)
Sun 10:52:36 PM	-30.1652	155.281	↖ 320°	473.0	544.0	36000.0	Level	Aus ATC (ADS-B)
Sun 10:52:38 PM	-30.1612	155.2773	↖ 323°	472.0	543.0	36000.0	Level	FlightAware ADS-B (SNH / YSPE)
Sun 10:52:41 PM	-30.1565	155.273	↖ 324°	473.0	544.0	36000.0	Level	Aus ATC (ADS-B)
Sun 10:52:51 PM	-30.1393	155.2573	↖ 322°	472.0	543.0	36000.0	Level	Aus ATC (ADS-B)
Sun 10:52:57 PM	-30.1309	155.2497	↖ 323°	472.0	543.0	36000.0	Level	Aus ATC (ADS-B)
Sun 10:53:10 PM	-30.1081	155.2289	↖ 322°	472.0	543.0	36000.0	Level	FlightAware ADS-B (BNE / YBBN)
Sun 10:53:39 PM	-30.0573	155.1827	↖ 323°	471.0	542.0	36000.0	Level	FlightAware ADS-B (SNH / YSPE)
Sun 10:54:10 PM	-30.0044	155.1346	↖ 322°	473.0	544.0	36000.0	Level	FlightAware ADS-B (BNE / YBBN)
Sun 10:54:38 PM	-29.9573	155.0916	↖ 323°	471.0	542.0	36000.0	-26 Descending	FlightAware ADS-B (SNH / YSPE)
Sun 10:55:08 PM	-29.9059	155.0449	↖ 322°	473.0	544.0	35975.0	Level	FlightAware ADS-B (YPLI)
Sun 10:55:39 PM	-29.8516	154.9958	↖ 323°	471.0	542.0	36000.0	Level	FlightAware ADS-B (SNH / YSPE)
Sun 10:56:10 PM	-29.7987	154.9478	↖ 322°	471.0	542.0	35975.0	Level	FlightAware ADS-B (BNE / YBBN)
Sun 10:56:42 PM	-29.7437	154.8982	↖ 322°	471.0	542.0	36000.0	24 Climbing	FlightAware ADS-B (YCFS)
Sun 10:57:12 PM	-29.6932	154.8523	↖ 322°	470.0	541.0	36000.0	Level	FlightAware ADS-B (YCFS)
Sun 10:57:42 PM	-29.6417	154.8058	↖ 322°	470.0	541.0	36000.0	Level	FlightAware ADS-B (YCFS)
Sun 10:58:10 PM	-29.5931	154.7622	↖ 323°	470.0	541.0	36000.0	-26 Descending	FlightAware ADS-B (SNH / YSPE)
Sun 10:58:40 PM	-29.5415	154.7158	↖ 323°	470.0	541.0	35975.0	-49 Descending	FlightAware ADS-B (SNH / YSPE)
Sun 10:59:11 PM	-29.4891	154.6687	↖ 322°	467.0	537.0	35950.0	Level	FlightAware ADS-B (OOL / YBCG)
Sun 10:59:41 PM	-29.4403	154.6251	↖ 322°	438.0	504.0	35975.0	25 Climbing	FlightAware ADS-B (OOL / YBCG)
Sun 11:00:12 PM	-29.3909	154.5813	↖ 322°	425.0	489.0	35975.0	Level	FlightAware ADS-B (BNE / YBBN)
Sun 11:00:44 PM	-29.3433	154.5388	↖ 323°	411.0	473.0	35975.0	Level	FlightAware ADS-B (YCFS)
Sun 11:01:11 PM	-29.3028	154.5024	↖ 322°	403.0	464.0	35975.0	28 Climbing	FlightAware ADS-B (YGAS)
Sun 11:01:38 PM	-29.2617	154.4656	↖ 323°	405.0	466.0	36000.0	26 Climbing	FlightAware ADS-B (YGAS)
Sun 11:02:09 PM	-29.2167	154.4254	↖ 323°	416.0	479.0	36000.0	Level	FlightAware ADS-B (BNE / YBBN)
Sun 11:02:42 PM	-29.166	154.3802	↖ 323°	416.0	479.0	36000.0	-438 Descending	FlightAware ADS-B (MCY / YBSU)
Sun 11:03:14 PM	-29.1183	154.3378	↖ 322°	411.0	473.0	35525.0	-1,592 Descending	FlightAware ADS-B (YCFS)
Sun 11:03:47 PM	-29.068	154.2934	↖ 322°	411.0	473.0	34275.0	-2,024 Descending	FlightAware ADS-B (BNE / YBBN)
Sun 11:04:17 PM	-29.023	154.2533	↖ 322°	408.0	470.0	33400.0	-1,733 Descending	FlightAware ADS-B (BNE / YBBN)
Sun 11:04:45 PM	-28.9815	154.2164	↖ 322°	402.0	463.0	32600.0	-1,694 Descending	FlightAware ADS-B (MCY / YBSU)
Sun 11:05:11 PM	-28.9439	154.1828	↖ 323°	397.0	457.0	31875.0	-1,741 Descending	FlightAware ADS-B (SNH / YSPE)
Sun 11:05:41 PM	-28.9005	154.1444	↖ 323°	392.0	451.0	30975.0	-1,725 Descending	FlightAware ADS-B (BNE / YBBN)
Sun 11:06:11 PM	-28.858	154.107	↖ 322°	388.0	447.0	30150.0	-1,675 Descending	FlightAware ADS-B (YPLI)
Sun 11:06:41 PM	-28.8153	154.0695	↖ 322°	383.0	441.0	29300.0	-1,675 Descending	FlightAware ADS-B (BNE / YBBN)
Sun 11:07:11 PM	-28.7733	154.0327	↖ 322°	376.0	433.0	28475.0	-1,450 Descending	FlightAware ADS-B (BNE / YBBN)
Sun 11:07:41 PM	-28.7327	153.9969	↖ 322°	364.0	419.0	27850.0	-1,225 Descending	FlightAware ADS-B (BNE / YBBN)
Sun 11:08:11 PM	-28.6929	153.9616	↖ 322°	351.0	404.0	27250.0	-1,250 Descending	FlightAware ADS-B (RCL / YRED)
Sun 11:08:41 PM	-28.6542	153.9276	↖ 322°	342.0	394.0	26600.0	-1,328 Descending	FlightAware ADS-B (YBAF)
Sun 11:09:12 PM	-28.617	153.8951	↖ 324°	333.0	383.0	25900.0	-1,500 Descending	FlightAware ADS-B (SNH / YSPE)
Sun 11:09:42 PM	-28.5817	153.8648	↖ 323°	322.0	371.0	25075.0	-1,660 Descending	FlightAware ADS-B (BNE / YBBN)
Sun 11:09:59 PM	-28.5619	153.8471	↖ 319°	319.0	367.0	24600.0	-1,622 Descending	FlightAware ADS-B (MCY / YBSU)
Sun 11:10:19 PM	-28.5455	153.8179	← 289°	326.0	375.0	24075.0	-1,458 Descending	FlightAware ADS-B (MCY / YBSU)
Sun 11:10:35 PM	-28.5429	153.7984	← 271°	332.0	382.0	23725.0	-1,533 Descending	FlightAware ADS-B (RCL / YRED)
Sun 11:11:05 PM	-28.5442	153.7378	← 268°	334.0	384.0	22900.0	-1,644 Descending	FlightAware ADS-B (OOL / YBCG)
Sun 11:11:27 PM	-28.5452	153.6993	← 270°	334.0	384.0	22300.0	-1,538 Descending	FlightAware ADS-B (YGAS)
Sun 11:11:44 PM	-28.5395	153.671	← 292°	323.0	372.0	21900.0	-1,393 Descending	FlightAware ADS-B (YAMB)
Sun 11:12:09 PM	-28.5232	153.6337	← 298°	315.0	362.0	21325.0	-1,436 Descending	FlightAware ADS-B (BNE / YBBN)
Sun 11:12:31 PM	-28.5079	153.5992	← 297°	313.0	360.0	20775.0	-1,390 Descending	FlightAware ADS-B (RCL / YRED)
Sun 11:12:50 PM	-28.4967	153.5741	← 298°	311.0	358.0	20375.0	-1,371 Descending	FlightAware ADS-B (YXIP)
Sun 11:13:06 PM	-28.4822	153.5558	↖ 324°	296.0	341.0	19975.0	-1,453 Descending	FlightAware ADS-B (YBAF)
Sun 11:13:22 PM	-28.462	153.5494	↑ 356°	279.0	321.0	19600.0	-1,444 Descending	FlightAware ADS-B (BNE / YBBN)
Sun 11:14:00 PM	-28.4121	153.5448	↑ 352°	281.0	323.0	18675.0	-1,238 Descending	FlightAware ADS-B (YAMB)
Sun 11:14:25 PM	-28.379	153.5389	↑ 351°	278.0	320.0	18300.0	-841 Descending	FlightAware ADS-B
Sun 11:14:41 PM	-28.3589	153.5352	↑ 351°	283.0	326.0	18100.0	-848 Descending	FlightAware ADS-B (RCL / YRED)
Sun 11:15:11 PM	-28.3175	153.5281	↑ 352°	309.0	356.0	17650.0	-975 Descending	FlightAware ADS-B (YBAF)
Sun 11:15:41 PM	-28.2744	153.5211	↑ 352°	317.0	365.0	17125.0	-1,067 Descending	FlightAware ADS-B (RCL / YRED)
Sun 11:16:03 PM	-28.2434	153.516	↑ 353°	322.0	371.0	16725.0	-1,321 Descending	FlightAware ADS-B (BNE / YBBN)
Sun 11:16:23 PM	-28.2137	153.5112	↑ 353°	320.0	368.0	16200.0	-1,618 Descending	FlightAware ADS-B (BNE / YBBN)
Sun 11:16:41 PM	-28.1857	153.5062	↑ 349°	318.0	366.0	15700.0	-1,544 Descending	FlightAware ADS-B (YBAF)
Sun 11:16:57 PM	-28.1635	153.4972	↖ 337°	319.0	367.0	15325.0	-1,500 Descending	FlightAware ADS-B (BNE / YBBN)
Sun 11:17:13 PM	-28.1451	153.4841	↖ 325°	321.0	369.0	14900.0	-1,630 Descending	FlightAware ADS-B
Sun 11:17:43 PM	-28.1081	153.454	↖ 324°	320.0	368.0	14075.0	-1,610 Descending	FlightAware ADS-B (YPRC)
Sun 11:17:54 PM	-28.0955	153.4437	↖ 324°	318.0	366.0	13800.0	-1,357 Descending	Aus ATC (ADS-B)
Sun 11:18:04 PM	-28.0836	153.4339	↖ 323°	318.0	366.0	13600.0	-1,200 Descending	Aus ATC (ADS-B)
Sun 11:18:09 PM	-28.0777	153.4291	↖ 324°	317.0	365.0	13500.0	-2,143 Descending	Aus ATC (ADS-B)
Sun 11:18:11 PM	-28.074	153.4261	↖ 324°	317.0	365.0	13350.0	-1,800 Descending	FlightAware ADS-B (YBAF)
Sun 11:18:19 PM	-28.0657	153.4192	↖ 324°	316.0	364.0	13200.0	-1,154 Descending	Aus ATC (ADS-B)
Sun 11:18:24 PM	-28.0599	153.4145	↖ 326°	316.0	364.0	13100.0	-1,800 Descending	Aus ATC (ADS-B)
Sun 11:18:29 PM	-28.0539	153.4096	↖ 321°	316.0	364.0	12900.0	-1,700 Descending	Aus ATC (ADS-B)
Sun 11:18:54 PM	-28.0249	153.386	↖ 324°	313.0	360.0	12250.0	-1,555 Descending	FlightAware ADS-B (YBAF)
Sun 11:19:24 PM	-27.9892	153.3569	↖ 324°	310.0	357.0	11475.0	-1,592 Descending	FlightAware ADS-B (BNE / YBBN)
Sun 11:19:43 PM	-27.968	153.3392	↖ 324°	310.0	357.0	10950.0	-1,533 Descending	FlightAware ADS-B (YAMB)
Sun 11:20:09 PM	-27.9381	153.3148	↖ 326°	308.0	354.0	10325.0	-1,537 Descending	FlightAware ADS-B (SNH / YSPE)
Sun 11:20:24 PM	-27.92	153.3002	↖ 324°	307.0	353.0	9900.0	-1,500 Descending	Aus ATC (ADS-B)
Sun 11:20:40 PM	-27.902	153.2856	↖ 325°	306.0	352.0	9550.0	-1,583 Descending	FlightAware ADS-B (BNE / YBBN)
Sun 11:21:00 PM	-27.8781	153.2658	↖ 324°	306.0	352.0	8950.0	-1,625 Descending	FlightAware ADS-B (YXIP)
Sun 11:21:04 PM	-27.8742	153.2625	↖ 321°	306.0	352.0	8900.0	-1,000 Descending	Aus ATC (ADS-B)
Sun 11:21:09 PM	-27.8685	153.2577	↖ 326°	305.0	351.0	8800.0	-1,800 Descending	Aus ATC (ADS-B)
Sun 11:21:14 PM	-27.8629	153.253	↖ 322°	305.0	351.0	8600.0	-2,000 Descending	Aus ATC (ADS-B)
Sun 11:21:21 PM	-27.8535	153.2453	↖ 324°	305.0	351.0	8400.0	-1,500 Descending	FlightAware ADS-B (RCL / YRED)
Sun 11:21:43 PM	-27.8297	153.2258	↖ 324°	304.0	350.0	7875.0	-1,455 Descending	FlightAware ADS-B (BNE / YBBN)
Sun 11:21:54 PM	-27.8173	153.2157	↖ 324°	302.0	348.0	7600.0	-1,500 Descending	Aus ATC (ADS-B)
Sun 11:22:13 PM	-27.7964	153.1986	↖ 324°	300.0	345.0	7125.0	-1,541 Descending	FlightAware ADS-B (YXIP)
Sun 11:22:31 PM	-27.7762	153.182	↖ 324°	298.0	343.0	6650.0	-1,573 Descending	FlightAware ADS-B (YBAF)
Sun 11:22:54 PM	-27.7498	153.1608	↖ 325°	295.0	339.0	6050.0	-1,594 Descending	FlightAware ADS-B (YBAF)
Sun 11:23:03 PM	-27.739	153.1522	↖ 324°	291.0	335.0	5800.0	-1,500 Descending	Aus ATC (ADS-B)
Sun 11:23:08 PM	-27.7335	153.1479	↖ 327°	288.0	331.0	5700.0	-1,406 Descending	Aus ATC (ADS-B)
Sun 11:23:19 PM	-27.721	153.1382	↖ 325°	281.0	323.0	5425.0	-1,200 Descending	FlightAware ADS-B (YBAF)
Sun 11:23:23 PM	-27.7173	153.1352	↖ 326°	281.0	323.0	5400.0	-1,342 Descending	Aus ATC (ADS-B)
Sun 11:23:38 PM	-27.7017	153.1223	↖ 324°	279.0	321.0	5000.0	-1,200 Descending	Aus ATC (ADS-B)
Sun 11:23:48 PM	-27.6915	153.1137	↖ 324°	275.0	316.0	4900.0	-720 Descending	Aus ATC (ADS-B)
Sun 11:24:03 PM	-27.6763	153.1014	↖ 324°	266.0	306.0	4700.0	-711 Descending	Aus ATC (ADS-B)
Sun 11:24:07 PM	-27.6727	153.0984	↖ 324°	262.0	302.0	4675.0	-600 Descending	FlightAware ADS-B (YAMB)
Sun 11:24:13 PM	-27.6666	153.0935	↖ 327°	258.0	297.0	4600.0	-625 Descending	Aus ATC (ADS-B)
Sun 11:24:31 PM	-27.6503	153.0807	↖ 325°	242.0	278.0	4425.0	-413 Descending	FlightAware ADS-B (CUD / YCDR)
Sun 11:24:53 PM	-27.6312	153.0654	↖ 323°	223.0	257.0	4325.0	-434 Descending	FlightAware ADS-B (BNE / YBBN)
Sun 11:25:09 PM	-27.6184	153.0547	↖ 324°	210.0	242.0	4150.0	-750 Descending	FlightAware ADS-B (YBAF)
Sun 11:25:25 PM	-27.6058	153.0442	↖ 324°	202.0	232.0	3925.0	-789 Descending	FlightAware ADS-B (MCY / YBSU)
Sun 11:25:28 PM	-27.6032	153.0421	↖ 326°	201.0	231.0	3900.0	-938 Descending	Aus ATC (ADS-B)
Sun 11:25:33 PM	-27.5995	153.0391	↖ 325°	198.0	228.0	3800.0	-1,038 Descending	Aus ATC (ADS-B)
Sun 11:25:41 PM	-27.594	153.0347	↖ 325°	194.0	223.0	3675.0	-600 Descending	FlightAware ADS-B (YXIP)
Sun 11:25:43 PM	-27.5922	153.0333	↖ 320°	193.0	222.0	3700.0	-643 Descending	Aus ATC (ADS-B)
Sun 11:25:48 PM	-27.5885	153.0305	↖ 329°	191.0	220.0	3600.0	-1,071 Descending	Aus ATC (ADS-B)
Sun 11:25:57 PM	-27.5815	153.0259	↖ 331°	187.0	215.0	3450.0	-800 Descending	FlightAware ADS-B (YBAF)
Sun 11:26:03 PM	-27.577	153.0243	↑ 341°	181.0	208.0	3400.0	-656 Descending	Aus ATC (ADS-B)
Sun 11:26:13 PM	-27.5689	153.0247	↑ 9°	172.0	198.0	3275.0	-519 Descending	FlightAware ADS-B (YBAF)
Sun 11:26:29 PM	-27.5574	153.0296	↗ 26°	163.0	188.0	3175.0	-563 Descending	FlightAware ADS-B (BNE / YBBN)
Sun 11:26:45 PM	-27.5463	153.0359	↗ 28°	164.0	189.0	2975.0	-553 Descending	FlightAware ADS-B (RCL / YRED)
Sun 11:26:48 PM	-27.5446	153.0369	↗ 25°	164.0	189.0	3000.0	-808 Descending	Aus ATC (ADS-B)
Sun 11:26:58 PM	-27.5378	153.0408	↗ 27°	165.0	190.0	2800.0	-1,269 Descending	Aus ATC (ADS-B)
Sun 11:27:01 PM	-27.5357	153.0421	↗ 28°	165.0	190.0	2725.0	-1,200 Descending	FlightAware ADS-B (BNE / YBBN)
Sun 11:27:03 PM	-27.5344	153.0428	↗ 30°	163.0	188.0	2700.0	-625 Descending	Aus ATC (ADS-B)
Sun 11:27:13 PM	-27.5278	153.0467	↗ 26°	162.0	186.0	2600.0	-750 Descending	Aus ATC (ADS-B)
Sun 11:27:17 PM	-27.5255	153.048	↗ 28°	162.0	186.0	2525.0	-600 Descending	FlightAware ADS-B
Sun 11:27:23 PM	-27.5211	153.0505	↗ 27°	162.0	186.0	2500.0	-682 Descending	Aus ATC (ADS-B)
Sun 11:27:28 PM	-27.5177	153.0524	↗ 32°	163.0	188.0	2400.0	-1,050 Descending	Aus ATC (ADS-B)
Sun 11:27:33 PM	-27.515	153.0541	↗ 27°	164.0	189.0	2325.0	-600 Descending	FlightAware ADS-B (YBAF)
Sun 11:27:38 PM	-27.5109	153.0564	↗ 27°	165.0	190.0	2300.0	-750 Descending	Aus ATC (ADS-B)
Sun 11:27:43 PM	-27.5075	153.0584	↗ 32°	167.0	192.0	2200.0	-1,200 Descending	Aus ATC (ADS-B)
Sun 11:27:48 PM	-27.504	153.0604	↗ 32°	168.0	193.0	2100.0	-1,000 Descending	Aus ATC (ADS-B)
Sun 11:27:52 PM	-27.501	153.0622	↗ 27°	168.0	193.0	2050.0	-600 Descending	FlightAware ADS-B (CUD / YCDR)
Sun 11:27:58 PM	-27.4971	153.0644	↗ 28°	168.0	193.0	2000.0	-818 Descending	Aus ATC (ADS-B)
Sun 11:28:03 PM	-27.4937	153.0662	↗ 30°	165.0	190.0	1900.0	-1,200 Descending	Aus ATC (ADS-B)
Sun 11:28:13 PM	-27.487	153.07	↗ 28°	160.0	184.0	1700.0	-1,026 Descending	Aus ATC (ADS-B)
Sun 11:28:22 PM	-27.4812	153.0733	↗ 27°	154.0	177.0	1575.0	-800 Descending	FlightAware ADS-B (YENO)
Sun 11:28:28 PM	-27.4775	153.0754	↗ 30°	150.0	173.0	1500.0	-656 Descending	Aus ATC (ADS-B)
Sun 11:28:38 PM	-27.4716	153.0789	↗ 30°	141.0	162.0	1400.0	-400 Descending	Aus ATC (ADS-B)
Sun 11:28:43 PM	-27.4688	153.0805	↗ 25°	140.0	161.0	1400.0	-400 Descending	Aus ATC (ADS-B)
Sun 11:28:53 PM	-27.4631	153.0838	↗ 23°	137.0	158.0	1300.0	-800 Descending	Aus ATC (ADS-B)
Sun 11:28:58 PM	-27.4602	153.0854	↗ 23°	137.0	158.0	1200.0	-947 Descending	Aus ATC (ADS-B)
Sun 11:29:12 PM	-27.452	153.09	↗ 27°	135.0	155.0	1000.0	-750 Descending	FlightAware ADS-B (BNE / YBBN)
Sun 11:29:28 PM	-27.4435	153.0949	↗ 27°	132.0	152.0	825.0	-581 Descending	FlightAware ADS-B (BNE / YBBN)
Sun 11:29:43 PM	-27.4355	153.0995	↗ 27°	131.0	151.0	700.0	-656 Descending	Aus ATC (ADS-B)
Sun 11:29:44 PM	-27.4356	153.0995	↗ 28°	131.0	151.0	650.0	-600 Descending	FlightAware ADS-B (RCL / YRED)
Sun 11:29:53 PM	-27.4302	153.1026	↗ 30°	130.0	150.0	600.0	-643 Descending	Aus ATC (ADS-B)
Sun 11:29:58 PM	-27.4275	153.1041	↑ 19°	129.0	148.0	500.0	-1,071 Descending	Aus ATC (ADS-B)
Sun 11:30:00 PM	-27.4262	153.1048	↗ 27°	130.0	150.0	475.0	-750 Descending	FlightAware ADS-B (BNE / YBBN)
