# Supplementary material for: TrackMatcher – a tool for finding intercepts in tracks of geographical positions
Source: Copernicus journal article supplement (doi:10.5194/gmd-15-7557-2022), 2022-10-18
Supplement: Supplementary file 1 [file gmd-15-7557-2022-supplement.zip › ESM/example/data/flights/VOZ123_27-JAN-2019_YBBN-NZDN.dat]

Time (CET)	Latitude	Longitude	Course	kts	mph	feet	Rate	Reporting Facility
Sun 09:38:42 AM	-27.3794	153.1314	↗ 26°	155.0	178.0	650.0	Level	FlightAware ADS-B (BNE / YBBN)
Sun 09:38:58 AM	-27.3693	153.1369	↗ 26°	157.0	181.0	1325.0	1,969 Climbing	FlightAware ADS-B (BNE / YBBN)
Sun 09:39:14 AM	-27.3586	153.1455	↗ 48°	176.0	203.0	1700.0	1,406 Climbing	FlightAware ADS-B (BNE / YBBN)
Sun 09:39:30 AM	-27.3521	153.1611	↗ 65°	208.0	239.0	2075.0	1,453 Climbing	FlightAware ADS-B (YPRC)
Sun 09:39:46 AM	-27.3458	153.1754	↗ 63°	223.0	257.0	2475.0	1,800 Climbing	FlightAware ADS-B (BNE / YBBN)
Sun 09:40:05 AM	-27.3354	153.1975	↗ 63°	244.0	281.0	3125.0	1,833 Climbing	FlightAware ADS-B (YPRC)
Sun 09:40:13 AM	-27.3325	153.2058	→ 67°	254.0	292.0	3300.0	1,269 Climbing	Aus ATC (ADS-B)
Sun 09:40:18 AM	-27.3316	153.2125	→ 81°	261.0	300.0	3400.0	2,400 Climbing	Aus ATC (ADS-B)
Sun 09:40:28 AM	-27.3338	153.2261	→ 101°	269.0	310.0	3900.0	3,105 Climbing	Aus ATC (ADS-B)
Sun 09:41:01 AM	-27.3636	153.2597	↘ 139°	279.0	321.0	5625.0	2,914 Climbing	FlightAware ADS-B (BNE / YBBN)
Sun 09:41:03 AM	-27.3653	153.2614	↘ 143°	279.0	321.0	5600.0	3,281 Climbing	Aus ATC (ADS-B)
Sun 09:41:17 AM	-27.3797	153.276	↘ 137°	278.0	320.0	6500.0	3,500 Climbing	Aus ATC (ADS-B)
Sun 09:41:27 AM	-27.3891	153.2859	↘ 137°	278.0	320.0	7000.0	3,115 Climbing	Aus ATC (ADS-B)
Sun 09:41:30 AM	-27.3924	153.2894	↘ 137°	279.0	321.0	7175.0	2,400 Climbing	FlightAware ADS-B (OOL / YBCG)
Sun 09:41:32 AM	-27.3937	153.2908	↘ 129°	279.0	321.0	7200.0	2,800 Climbing	Aus ATC (ADS-B)
Sun 09:42:00 AM	-27.4192	153.3184	↘ 136°	281.0	323.0	8575.0	2,900 Climbing	FlightAware ADS-B
Sun 09:42:32 AM	-27.45	153.3517	↘ 136°	284.0	327.0	10100.0	2,175 Climbing	Aus ATC (ADS-B)
Sun 09:43:00 AM	-27.477	153.3804	↘ 136°	311.0	358.0	10750.0	1,350 Climbing	FlightAware ADS-B (CUD / YCDR)
Sun 09:43:12 AM	-27.4908	153.3953	↘ 136°	325.0	374.0	11000.0	955 Climbing	Aus ATC (ADS-B)
Sun 09:43:22 AM	-27.502	153.4071	↘ 136°	337.0	388.0	11100.0	800 Climbing	Aus ATC (ADS-B)
Sun 09:43:27 AM	-27.5077	153.4133	↘ 136°	342.0	394.0	11200.0	1,313 Climbing	Aus ATC (ADS-B)
Sun 09:43:30 AM	-27.5102	153.416	↘ 136°	344.0	396.0	11275.0	1,853 Climbing	FlightAware ADS-B (BNE / YBBN)
Sun 09:44:01 AM	-27.5476	153.4559	↘ 137°	360.0	414.0	12250.0	2,032 Climbing	FlightAware ADS-B (YGAS)
Sun 09:44:32 AM	-27.5859	153.4968	↘ 136°	369.0	425.0	13375.0	2,262 Climbing	FlightAware ADS-B (YTWB)
Sun 09:45:02 AM	-27.6243	153.5379	↘ 136°	374.0	430.0	14550.0	2,310 Climbing	FlightAware ADS-B (CUD / YCDR)
Sun 09:45:22 AM	-27.6487	153.564	↘ 137°	377.0	434.0	15300.0	2,040 Climbing	Aus ATC (ADS-B)
Sun 09:45:27 AM	-27.6551	153.5708	↘ 136°	378.0	435.0	15400.0	1,950 Climbing	Aus ATC (ADS-B)
Sun 09:45:32 AM	-27.6626	153.5789	↘ 136°	381.0	438.0	15625.0	2,400 Climbing	FlightAware ADS-B (CUD / YCDR)
Sun 09:45:37 AM	-27.6678	153.5844	↘ 137°	381.0	438.0	15800.0	2,050 Climbing	Aus ATC (ADS-B)
Sun 09:46:02 AM	-27.7006	153.6196	↘ 136°	386.0	444.0	16650.0	1,950 Climbing	FlightAware ADS-B (CUD / YCDR)
Sun 09:46:17 AM	-27.7194	153.6398	↘ 137°	388.0	447.0	17100.0	1,950 Climbing	Aus ATC (ADS-B)
Sun 09:46:22 AM	-27.7259	153.6468	↘ 137°	388.0	447.0	17300.0	2,400 Climbing	Aus ATC (ADS-B)
Sun 09:46:32 AM	-27.739	153.6607	↘ 137°	389.0	448.0	17700.0	1,773 Climbing	Aus ATC (ADS-B)
Sun 09:46:33 AM	-27.7405	153.6625	↘ 136°	389.0	448.0	17625.0	1,800 Climbing	FlightAware ADS-B
Sun 09:46:42 AM	-27.752	153.6748	↘ 135°	390.0	449.0	18000.0	2,464 Climbing	Aus ATC (ADS-B)
Sun 09:46:47 AM	-27.7584	153.6817	↘ 137°	391.0	450.0	18200.0	2,000 Climbing	Aus ATC (ADS-B)
Sun 09:46:57 AM	-27.7716	153.6959	↘ 137°	393.0	452.0	18500.0	2,063 Climbing	Aus ATC (ADS-B)
Sun 09:47:03 AM	-27.7791	153.7039	↘ 136°	392.0	451.0	18750.0	2,400 Climbing	FlightAware ADS-B (SNH / YSPE)
Sun 09:47:07 AM	-27.7848	153.71	↘ 137°	394.0	453.0	18900.0	1,929 Climbing	Aus ATC (ADS-B)
Sun 09:47:17 AM	-27.7981	153.7243	↘ 136°	396.0	456.0	19200.0	1,944 Climbing	Aus ATC (ADS-B)
Sun 09:47:34 AM	-27.8227	153.7508	↘ 136°	399.0	459.0	19775.0	1,763 Climbing	FlightAware ADS-B (BNE / YBBN)
Sun 09:47:57 AM	-27.8513	153.7814	↘ 138°	404.0	465.0	20375.0	1,768 Climbing	FlightAware ADS-B (BNE / YBBN)
Sun 09:48:02 AM	-27.8587	153.7887	↘ 138°	405.0	466.0	20600.0	2,175 Climbing	Aus ATC (ADS-B)
Sun 09:48:17 AM	-27.8814	153.8081	↘ 145°	406.0	467.0	21100.0	1,950 Climbing	FlightAware ADS-B (BNE / YBBN)
Sun 09:48:42 AM	-27.921	153.8358	↘ 148°	408.0	470.0	21900.0	1,800 Climbing	Aus ATC (ADS-B)
Sun 09:48:47 AM	-27.9292	153.8415	↘ 149°	409.0	471.0	22000.0	955 Climbing	Aus ATC (ADS-B)
Sun 09:48:53 AM	-27.9383	153.8478	↘ 149°	411.0	473.0	22075.0	1,167 Climbing	FlightAware ADS-B
Sun 09:49:23 AM	-27.9879	153.8819	↘ 149°	423.0	487.0	22700.0	1,125 Climbing	FlightAware ADS-B (YCAB)
Sun 09:49:37 AM	-28.0119	153.8984	↘ 149°	429.0	494.0	22900.0	947 Climbing	Aus ATC (ADS-B)
Sun 09:49:42 AM	-28.0204	153.9043	↘ 147°	431.0	496.0	23000.0	1,200 Climbing	Aus ATC (ADS-B)
Sun 09:49:52 AM	-28.0376	153.916	↘ 148°	435.0	501.0	23200.0	1,250 Climbing	Aus ATC (ADS-B)
Sun 09:49:54 AM	-28.044	153.9204	↘ 149°	436.0	502.0	23250.0	1,200 Climbing	FlightAware ADS-B (BNE / YBBN)
Sun 09:49:57 AM	-28.0463	153.922	↘ 143°	437.0	503.0	23300.0	1,125 Climbing	Aus ATC (ADS-B)
Sun 09:50:02 AM	-28.055	153.9279	↘ 149°	437.0	503.0	23400.0	1,200 Climbing	Aus ATC (ADS-B)
Sun 09:50:12 AM	-28.0724	153.9398	↘ 149°	440.0	506.0	23600.0	1,200 Climbing	Aus ATC (ADS-B)
Sun 09:50:17 AM	-28.0811	153.9458	↘ 150°	440.0	506.0	23700.0	1,500 Climbing	Aus ATC (ADS-B)
Sun 09:50:24 AM	-28.0923	153.9534	↘ 149°	441.0	507.0	23900.0	1,800 Climbing	FlightAware ADS-B
Sun 09:50:27 AM	-28.0985	153.9577	↘ 146°	441.0	507.0	24000.0	1,500 Climbing	Aus ATC (ADS-B)
Sun 09:50:32 AM	-28.1072	153.9637	↘ 150°	442.0	509.0	24100.0	1,600 Climbing	Aus ATC (ADS-B)
Sun 09:50:42 AM	-28.1248	153.9757	↘ 150°	443.0	510.0	24400.0	1,500 Climbing	Aus ATC (ADS-B)
Sun 09:50:52 AM	-28.1423	153.9878	↘ 149°	445.0	512.0	24600.0	875 Climbing	Aus ATC (ADS-B)
Sun 09:50:54 AM	-28.1454	153.9899	↘ 149°	445.0	512.0	24575.0	1,200 Climbing	FlightAware ADS-B
Sun 09:50:57 AM	-28.1512	153.9938	↘ 150°	445.0	512.0	24700.0	1,350 Climbing	Aus ATC (ADS-B)
Sun 09:51:24 AM	-28.1989	154.0267	↘ 149°	448.0	516.0	25250.0	1,350 Climbing	FlightAware ADS-B (YBAF)
Sun 09:51:37 AM	-28.2221	154.0426	↘ 149°	452.0	520.0	25600.0	1,588 Climbing	Aus ATC (ADS-B)
Sun 09:51:41 AM	-28.231	154.0488	↘ 150°	452.0	520.0	25700.0	1,286 Climbing	Aus ATC (ADS-B)
Sun 09:51:51 AM	-28.249	154.061	↘ 149°	453.0	521.0	25900.0	1,385 Climbing	Aus ATC (ADS-B)
Sun 09:51:54 AM	-28.2537	154.0643	↘ 149°	454.0	522.0	26000.0	1,200 Climbing	FlightAware ADS-B (OOL / YBCG)
Sun 09:51:56 AM	-28.2578	154.0672	↘ 146°	454.0	522.0	26000.0	1,250 Climbing	Aus ATC (ADS-B)
Sun 09:52:24 AM	-28.3069	154.101	↘ 149°	457.0	526.0	26625.0	1,350 Climbing	FlightAware ADS-B (BNE / YBBN)
Sun 09:52:36 AM	-28.3301	154.117	↘ 149°	460.0	529.0	26900.0	1,295 Climbing	Aus ATC (ADS-B)
Sun 09:52:46 AM	-28.3483	154.1296	↘ 149°	461.0	531.0	27100.0	1,200 Climbing	Aus ATC (ADS-B)
Sun 09:52:51 AM	-28.3575	154.1359	↘ 150°	463.0	533.0	27200.0	1,050 Climbing	Aus ATC (ADS-B)
Sun 09:52:56 AM	-28.3666	154.1423	↘ 149°	463.0	533.0	27275.0	1,200 Climbing	FlightAware ADS-B (MCY / YBSU)
Sun 09:53:06 AM	-28.3848	154.1549	↘ 148°	465.0	535.0	27500.0	1,300 Climbing	Aus ATC (ADS-B)
Sun 09:53:11 AM	-28.394	154.1613	↘ 149°	465.0	535.0	27600.0	800 Climbing	Aus ATC (ADS-B)
Sun 09:53:21 AM	-28.4124	154.174	↘ 148°	467.0	537.0	27700.0	900 Climbing	Aus ATC (ADS-B)
Sun 09:53:26 AM	-28.4213	154.1802	↘ 148°	468.0	539.0	27825.0	1,200 Climbing	FlightAware ADS-B (OOL / YBCG)
Sun 09:53:36 AM	-28.4401	154.1932	↘ 148°	470.0	541.0	28000.0	1,100 Climbing	Aus ATC (ADS-B)
Sun 09:53:56 AM	-28.4771	154.2189	↘ 148°	472.0	543.0	28375.0	1,200 Climbing	FlightAware ADS-B (BNE / YBBN)
Sun 09:54:16 AM	-28.5146	154.2449	↘ 149°	473.0	544.0	28800.0	1,500 Climbing	Aus ATC (ADS-B)
Sun 09:54:26 AM	-28.5344	154.2586	↘ 149°	471.0	542.0	29125.0	1,600 Climbing	FlightAware ADS-B (BNE / YBBN)
Sun 09:54:31 AM	-28.5426	154.2643	↘ 150°	471.0	542.0	29200.0	1,500 Climbing	Aus ATC (ADS-B)
Sun 09:54:41 AM	-28.5611	154.2772	↘ 148°	471.0	542.0	29500.0	1,600 Climbing	Aus ATC (ADS-B)
Sun 09:54:46 AM	-28.5704	154.2836	↘ 148°	471.0	542.0	29600.0	1,200 Climbing	Aus ATC (ADS-B)
Sun 09:54:51 AM	-28.5797	154.29	↘ 150°	471.0	542.0	29700.0	1,500 Climbing	Aus ATC (ADS-B)
Sun 09:54:56 AM	-28.5908	154.2977	↘ 149°	471.0	542.0	29850.0	1,200 Climbing	FlightAware ADS-B (OOL / YBCG)
Sun 09:55:01 AM	-28.5984	154.3029	↘ 150°	471.0	542.0	29900.0	1,500 Climbing	Aus ATC (ADS-B)
Sun 09:55:06 AM	-28.6077	154.3094	↘ 149°	471.0	542.0	30100.0	1,600 Climbing	Aus ATC (ADS-B)
Sun 09:55:16 AM	-28.6262	154.3222	↘ 148°	471.0	542.0	30300.0	1,125 Climbing	Aus ATC (ADS-B)
Sun 09:55:26 AM	-28.6467	154.3364	↘ 149°	471.0	542.0	30475.0	1,200 Climbing	FlightAware ADS-B (BNE / YBBN)
Sun 09:55:31 AM	-28.6541	154.3415	↘ 147°	471.0	542.0	30600.0	1,300 Climbing	Aus ATC (ADS-B)
Sun 09:55:41 AM	-28.6727	154.3544	↘ 148°	471.0	542.0	30800.0	1,200 Climbing	Aus ATC (ADS-B)
Sun 09:55:46 AM	-28.6822	154.361	↘ 147°	472.0	543.0	30900.0	1,200 Climbing	Aus ATC (ADS-B)
Sun 09:55:56 AM	-28.7006	154.3738	↘ 149°	471.0	542.0	31100.0	1,200 Climbing	Aus ATC (ADS-B)
Sun 09:56:01 AM	-28.7099	154.3803	↘ 149°	471.0	542.0	31200.0	1,500 Climbing	Aus ATC (ADS-B)
Sun 09:56:16 AM	-28.7377	154.3998	↘ 148°	470.0	541.0	31600.0	1,500 Climbing	Aus ATC (ADS-B)
Sun 09:56:21 AM	-28.7469	154.4062	↘ 149°	469.0	540.0	31700.0	1,200 Climbing	Aus ATC (ADS-B)
Sun 09:56:26 AM	-28.7556	154.4123	↘ 148°	468.0	539.0	31800.0	1,800 Climbing	FlightAware ADS-B (YPLI)
Sun 09:56:31 AM	-28.7654	154.4192	↘ 147°	467.0	537.0	32000.0	1,600 Climbing	Aus ATC (ADS-B)
Sun 09:56:56 AM	-28.8113	154.4513	↘ 148°	463.0	533.0	32600.0	1,350 Climbing	FlightAware ADS-B (OOL / YBCG)
Sun 09:57:11 AM	-28.8383	154.4701	↘ 148°	460.0	529.0	32900.0	800 Climbing	Aus ATC (ADS-B)
Sun 09:57:26 AM	-28.8654	154.4891	↘ 148°	457.0	526.0	33000.0	240 Climbing	Aus ATC (ADS-B)
Sun 09:57:36 AM	-28.8833	154.5016	↘ 148°	457.0	526.0	33000.0	Level	Aus ATC (ADS-B)
Sun 09:57:41 AM	-28.8923	154.5079	↘ 150°	457.0	526.0	33000.0	Level	Aus ATC (ADS-B)
Sun 09:57:51 AM	-28.9104	154.5205	↘ 149°	457.0	526.0	33000.0	-100 Descending	Aus ATC (ADS-B)
Sun 09:57:56 AM	-28.9198	154.527	↘ 148°	457.0	526.0	32975.0	Level	FlightAware ADS-B (YPLI)
Sun 09:58:01 AM	-28.9284	154.533	↘ 149°	457.0	526.0	33000.0	100 Climbing	Aus ATC (ADS-B)
Sun 09:58:11 AM	-28.9465	154.5456	↘ 149°	457.0	526.0	33000.0	Level	Aus ATC (ADS-B)
Sun 09:58:26 AM	-28.9734	154.5642	↘ 149°	457.0	526.0	33000.0	Level	Aus ATC (ADS-B)
Sun 09:58:36 AM	-28.9916	154.5768	↘ 148°	457.0	526.0	33000.0	Level	Aus ATC (ADS-B)
Sun 09:58:41 AM	-29.0005	154.583	↘ 150°	456.0	525.0	33000.0	Level	Aus ATC (ADS-B)
Sun 09:58:51 AM	-29.0185	154.5955	↘ 149°	456.0	525.0	33000.0	Level	Aus ATC (ADS-B)
Sun 09:58:56 AM	-29.0275	154.6018	↘ 151°	456.0	525.0	33000.0	Level	Aus ATC (ADS-B)
Sun 09:59:01 AM	-29.0366	154.6081	↘ 149°	456.0	525.0	33000.0	Level	Aus ATC (ADS-B)
Sun 09:59:11 AM	-29.0545	154.6206	↘ 148°	456.0	525.0	33000.0	Level	Aus ATC (ADS-B)
Sun 09:59:16 AM	-29.0636	154.627	↘ 150°	457.0	526.0	33000.0	Level	Aus ATC (ADS-B)
Sun 09:59:26 AM	-29.0815	154.6395	↘ 149°	456.0	525.0	33000.0	Level	Aus ATC (ADS-B)
Sun 09:59:36 AM	-29.0994	154.6522	↘ 149°	455.0	524.0	33000.0	Level	Aus ATC (ADS-B)
Sun 09:59:41 AM	-29.1083	154.6584	↘ 148°	455.0	524.0	33000.0	Level	Aus ATC (ADS-B)
Sun 09:59:51 AM	-29.1263	154.6712	↘ 147°	455.0	524.0	33000.0	Level	Aus ATC (ADS-B)
Sun 09:59:57 AM	-29.1371	154.6788	↘ 148°	455.0	524.0	33000.0	-32 Descending	FlightAware ADS-B (YBAF)
Sun 10:00:38 AM	-29.2107	154.7308	↘ 148°	455.0	524.0	32975.0	Level	FlightAware ADS-B (OOL / YBCG)
Sun 10:00:41 AM	-29.216	154.7345	↘ 150°	455.0	524.0	33000.0	115 Climbing	Aus ATC (ADS-B)
Sun 10:00:51 AM	-29.2338	154.7472	↘ 149°	455.0	524.0	33000.0	Level	Aus ATC (ADS-B)
Sun 10:00:56 AM	-29.2428	154.7534	↘ 148°	455.0	524.0	33000.0	Level	Aus ATC (ADS-B)
Sun 10:01:06 AM	-29.2607	154.7661	↘ 147°	455.0	524.0	33000.0	Level	Aus ATC (ADS-B)
Sun 10:01:08 AM	-29.2649	154.7691	↘ 148°	455.0	524.0	33000.0	Level	FlightAware ADS-B (OOL / YBCG)
Sun 10:01:21 AM	-29.2874	154.785	↘ 148°	455.0	524.0	33000.0	Level	Aus ATC (ADS-B)
Sun 10:01:35 AM	-29.3144	154.804	↘ 148°	455.0	524.0	33000.0	Level	Aus ATC (ADS-B)
Sun 10:01:38 AM	-29.3183	154.8068	↘ 148°	455.0	524.0	33000.0	Level	FlightAware ADS-B (OOL / YBCG)
Sun 10:02:09 AM	-29.3748	154.8467	↘ 148°	455.0	524.0	33000.0	-25 Descending	FlightAware ADS-B (BNK / YBNA)
Sun 10:02:39 AM	-29.4284	154.8846	↘ 148°	455.0	524.0	32975.0	Level	FlightAware ADS-B (BNK / YBNA)
Sun 10:02:45 AM	-29.4396	154.8926	↘ 149°	455.0	524.0	33000.0	71 Climbing	Aus ATC (ADS-B)
Sun 10:03:00 AM	-29.4664	154.9116	↘ 149°	455.0	524.0	33000.0	Level	Aus ATC (ADS-B)
Sun 10:03:10 AM	-29.4832	154.9234	↘ 148°	455.0	524.0	33000.0	Level	FlightAware ADS-B (BNK / YBNA)
Sun 10:03:40 AM	-29.5356	154.9604	↘ 148°	455.0	524.0	33000.0	Level	FlightAware ADS-B (BNK / YBNA)
Sun 10:03:50 AM	-29.5556	154.9746	↘ 148°	455.0	524.0	33000.0	Level	Aus ATC (ADS-B)
Sun 10:03:55 AM	-29.5645	154.981	↘ 150°	455.0	524.0	33000.0	Level	Aus ATC (ADS-B)
Sun 10:04:00 AM	-29.5735	154.9873	↘ 149°	455.0	524.0	33000.0	Level	Aus ATC (ADS-B)
Sun 10:04:15 AM	-29.6002	155.0063	↘ 148°	456.0	525.0	33000.0	Level	Aus ATC (ADS-B)
Sun 10:04:25 AM	-29.6181	155.0191	↘ 148°	456.0	525.0	33000.0	Level	Aus ATC (ADS-B)
Sun 10:04:40 AM	-29.6451	155.0384	↘ 148°	456.0	525.0	33000.0	Level	Aus ATC (ADS-B)
Sun 10:04:43 AM	-29.6497	155.0417	↘ 148°	457.0	526.0	33000.0	Level	FlightAware ADS-B (YCFS)
Sun 10:04:50 AM	-29.6631	155.0511	↘ 149°	457.0	526.0	33000.0	Level	Aus ATC (ADS-B)
Sun 10:04:55 AM	-29.6721	155.0574	↘ 148°	457.0	526.0	33000.0	Level	Aus ATC (ADS-B)
Sun 10:05:05 AM	-29.6899	155.0703	↘ 147°	457.0	526.0	33000.0	Level	Aus ATC (ADS-B)
Sun 10:05:10 AM	-29.6989	155.0767	↘ 147°	457.0	526.0	33000.0	Level	Aus ATC (ADS-B)
Sun 10:05:15 AM	-29.7079	155.0831	↘ 150°	458.0	527.0	33000.0	Level	Aus ATC (ADS-B)
Sun 10:05:17 AM	-29.7107	155.0852	↘ 148°	458.0	527.0	33000.0	Level	FlightAware ADS-B (BNE / YBBN)
Sun 10:05:25 AM	-29.726	155.0959	↘ 148°	458.0	527.0	33000.0	Level	Aus ATC (ADS-B)
Sun 10:05:30 AM	-29.7347	155.1023	↘ 148°	458.0	527.0	33000.0	Level	Aus ATC (ADS-B)
Sun 10:05:40 AM	-29.7529	155.1151	↘ 148°	459.0	528.0	33000.0	Level	Aus ATC (ADS-B)
Sun 10:05:47 AM	-29.7648	155.1237	↘ 148°	459.0	528.0	33000.0	Level	FlightAware ADS-B (BNE / YBBN)
Sun 10:05:55 AM	-29.78	155.1344	↘ 149°	459.0	528.0	33000.0	Level	Aus ATC (ADS-B)
Sun 10:06:05 AM	-29.7979	155.1473	↘ 147°	459.0	528.0	33000.0	Level	Aus ATC (ADS-B)
Sun 10:06:10 AM	-29.807	155.1537	↘ 147°	459.0	528.0	33000.0	Level	Aus ATC (ADS-B)
Sun 10:06:20 AM	-29.825	155.1666	↘ 149°	460.0	529.0	33000.0	Level	Aus ATC (ADS-B)
Sun 10:06:30 AM	-29.8429	155.1795	↘ 149°	460.0	529.0	33000.0	Level	Aus ATC (ADS-B)
Sun 10:06:35 AM	-29.8522	155.186	↘ 151°	461.0	531.0	33000.0	Level	Aus ATC (ADS-B)
Sun 10:06:45 AM	-29.8703	155.1989	↘ 148°	461.0	531.0	33000.0	Level	Aus ATC (ADS-B)
Sun 10:06:50 AM	-29.8786	155.2049	↘ 148°	461.0	531.0	33000.0	Level	FlightAware ADS-B (BNE / YBBN)
Sun 10:06:55 AM	-29.8882	155.2119	↘ 148°	461.0	531.0	33000.0	Level	Aus ATC (ADS-B)
Sun 10:07:24 AM	-29.9411	155.2496	↘ 148°	462.0	532.0	33000.0	Level	FlightAware ADS-B (BNE / YBBN)
Sun 10:07:35 AM	-29.9607	155.2636	↘ 149°	462.0	532.0	33000.0	Level	Aus ATC (ADS-B)
Sun 10:07:45 AM	-29.9789	155.2767	↘ 149°	462.0	532.0	33000.0	Level	Aus ATC (ADS-B)
Sun 10:07:50 AM	-29.9879	155.2831	↘ 150°	462.0	532.0	33000.0	-167 Descending	Aus ATC (ADS-B)
Sun 10:07:54 AM	-29.9949	155.2882	↘ 148°	462.0	532.0	32975.0	Level	FlightAware ADS-B (YCFS)
Sun 10:08:00 AM	-30.006	155.2963	↘ 147°	462.0	532.0	33000.0	136 Climbing	Aus ATC (ADS-B)
Sun 10:08:05 AM	-30.0153	155.3028	↘ 148°	462.0	532.0	33000.0	Level	Aus ATC (ADS-B)
Sun 10:08:10 AM	-30.0243	155.3092	↘ 149°	462.0	532.0	33000.0	Level	Aus ATC (ADS-B)
Sun 10:08:20 AM	-30.0424	155.3223	↘ 148°	463.0	533.0	33000.0	Level	Aus ATC (ADS-B)
Sun 10:08:26 AM	-30.0558	155.332	↘ 148°	463.0	533.0	33000.0	Level	FlightAware ADS-B (YARM)
Sun 10:08:35 AM	-30.0695	155.3419	↘ 148°	463.0	533.0	33000.0	Level	Aus ATC (ADS-B)
Sun 10:08:45 AM	-30.0879	155.355	↘ 148°	464.0	534.0	33000.0	Level	Aus ATC (ADS-B)
Sun 10:08:50 AM	-30.0971	155.3617	↘ 148°	463.0	533.0	33000.0	Level	Aus ATC (ADS-B)
Sun 10:08:57 AM	-30.1089	155.3701	↘ 148°	463.0	533.0	33000.0	Level	FlightAware ADS-B (YCFS)
Sun 10:09:00 AM	-30.1152	155.3747	↘ 147°	463.0	533.0	33000.0	Level	Aus ATC (ADS-B)
Sun 10:09:05 AM	-30.1241	155.3811	↘ 150°	464.0	534.0	33000.0	Level	Aus ATC (ADS-B)
Sun 10:09:10 AM	-30.1334	155.3877	↘ 148°	464.0	534.0	33000.0	Level	Aus ATC (ADS-B)
Sun 10:09:15 AM	-30.1423	155.3941	↘ 149°	464.0	534.0	33000.0	Level	Aus ATC (ADS-B)
Sun 10:09:24 AM	-30.1603	155.4072	↘ 148°	464.0	534.0	33000.0	Level	Aus ATC (ADS-B)
Sun 10:09:28 AM	-30.1667	155.4117	↘ 148°	464.0	534.0	33000.0	Level	FlightAware ADS-B (OOL / YBCG)
Sun 10:09:29 AM	-30.1694	155.4136	↘ 152°	464.0	534.0	33000.0	Level	Aus ATC (ADS-B)
Sun 10:09:44 AM	-30.1964	155.4333	↘ 148°	463.0	533.0	33000.0	Level	Aus ATC (ADS-B)
Sun 10:09:50 AM	-30.2059	155.4399	↘ 148°	463.0	533.0	33000.0	Level	Aus ATC (ADS-B)
Sun 10:09:58 AM	-30.222	155.4516	↘ 148°	463.0	533.0	33000.0	Level	FlightAware ADS-B (OOL / YBCG)
Sun 10:10:00 AM	-30.2241	155.453	↓ 158°	463.0	533.0	33000.0	Level	Aus ATC (ADS-B)
Sun 10:10:14 AM	-30.2514	155.4727	↘ 148°	463.0	533.0	33000.0	Level	Aus ATC (ADS-B)
Sun 10:10:29 AM	-30.2782	155.4923	↘ 148°	463.0	533.0	33000.0	Level	Aus ATC (ADS-B)
Sun 10:10:39 AM	-30.2965	155.5055	↘ 148°	462.0	532.0	33000.0	Level	Aus ATC (ADS-B)
Sun 10:10:44 AM	-30.3056	155.5121	↘ 146°	462.0	532.0	33000.0	Level	Aus ATC (ADS-B)
Sun 10:10:54 AM	-30.3237	155.5251	↘ 148°	461.0	531.0	33000.0	Level	Aus ATC (ADS-B)
Sun 10:10:59 AM	-30.3311	155.5305	↘ 148°	461.0	531.0	33000.0	Level	FlightAware ADS-B (YCFS)
Sun 10:11:04 AM	-30.3416	155.5381	↘ 146°	461.0	531.0	33000.0	Level	Aus ATC (ADS-B)
Sun 10:11:14 AM	-30.3596	155.5511	↘ 148°	461.0	531.0	33000.0	Level	Aus ATC (ADS-B)
Sun 10:11:19 AM	-30.3688	155.5577	↘ 148°	460.0	529.0	33000.0	Level	Aus ATC (ADS-B)
Sun 10:11:29 AM	-30.3869	155.5708	↘ 149°	460.0	529.0	33000.0	-150 Descending	Aus ATC (ADS-B)
Sun 10:11:29 AM	-30.3853	155.5696	↘ 148°	460.0	529.0	32975.0	Level	FlightAware ADS-B (YCFS)
Sun 10:11:44 AM	-30.4136	155.5901	↘ 149°	460.0	529.0	33000.0	60 Climbing	Aus ATC (ADS-B)
Sun 10:11:54 AM	-30.4318	155.603	↘ 148°	459.0	528.0	33000.0	-100 Descending	Aus ATC (ADS-B)
Sun 10:11:59 AM	-30.4359	155.6062	↘ 148°	459.0	528.0	32975.0	Level	FlightAware ADS-B (YCFS)
Sun 10:12:29 AM	-30.4933	155.6478	↘ 148°	458.0	527.0	33000.0	43 Climbing	FlightAware ADS-B (OOL / YBCG)
Sun 10:12:34 AM	-30.5036	155.6552	↘ 149°	458.0	527.0	33000.0	Level	Aus ATC (ADS-B)
Sun 10:12:39 AM	-30.5127	155.6618	↘ 147°	458.0	527.0	33000.0	Level	Aus ATC (ADS-B)
Sun 10:12:44 AM	-30.5216	155.6684	↘ 148°	458.0	527.0	33000.0	Level	Aus ATC (ADS-B)
Sun 10:12:54 AM	-30.5397	155.6815	↘ 147°	458.0	527.0	33000.0	Level	Aus ATC (ADS-B)
Sun 10:12:59 AM	-30.5486	155.6881	↘ 150°	458.0	527.0	33000.0	Level	Aus ATC (ADS-B)
Sun 10:13:09 AM	-30.5662	155.7009	↘ 148°	458.0	527.0	33000.0	Level	Aus ATC (ADS-B)
Sun 10:13:19 AM	-30.5842	155.714	↘ 148°	457.0	526.0	33000.0	Level	Aus ATC (ADS-B)
Sun 10:13:24 AM	-30.5934	155.7207	↘ 148°	457.0	526.0	33000.0	Level	Aus ATC (ADS-B)
Sun 10:13:34 AM	-30.611	155.7335	↘ 148°	457.0	526.0	33000.0	Level	Aus ATC (ADS-B)
Sun 10:13:39 AM	-30.62	155.7401	↘ 150°	457.0	526.0	33000.0	Level	Aus ATC (ADS-B)
Sun 10:13:42 AM	-30.6271	155.7453	↘ 148°	458.0	527.0	33000.0	Level	FlightAware ADS-B (PQQ / YPMQ)
Sun 10:13:44 AM	-30.629	155.7466	↘ 143°	457.0	526.0	33000.0	Level	Aus ATC (ADS-B)
Sun 10:13:54 AM	-30.647	155.7597	↘ 149°	457.0	526.0	33000.0	Level	Aus ATC (ADS-B)
Sun 10:13:59 AM	-30.6557	155.7661	↘ 149°	457.0	526.0	33000.0	Level	Aus ATC (ADS-B)
Sun 10:14:04 AM	-30.6649	155.7728	↘ 148°	457.0	526.0	33000.0	Level	Aus ATC (ADS-B)
Sun 10:14:09 AM	-30.6737	155.7792	↘ 149°	457.0	526.0	33000.0	-188 Descending	Aus ATC (ADS-B)
Sun 10:14:12 AM	-30.6803	155.7841	↘ 148°	458.0	527.0	32975.0	Level	FlightAware ADS-B (PQQ / YPMQ)
Sun 10:14:19 AM	-30.6915	155.7922	↘ 148°	457.0	526.0	33000.0	125 Climbing	Aus ATC (ADS-B)
Sun 10:14:24 AM	-30.7003	155.7988	↘ 147°	457.0	526.0	33000.0	Level	Aus ATC (ADS-B)
Sun 10:15:02 AM	-30.7682	155.8482	↘ 148°	457.0	526.0	33000.0	Level	FlightAware ADS-B (YCFS)
Sun 10:15:04 AM	-30.7721	155.8511	↘ 146°	457.0	526.0	33000.0	Level	Aus ATC (ADS-B)
Sun 10:15:14 AM	-30.7897	155.864	↘ 148°	457.0	526.0	33000.0	Level	Aus ATC (ADS-B)
Sun 10:15:19 AM	-30.7989	155.8707	↘ 148°	457.0	526.0	33000.0	Level	Aus ATC (ADS-B)
Sun 10:15:24 AM	-30.8079	155.8773	↘ 149°	457.0	526.0	33000.0	Level	Aus ATC (ADS-B)
Sun 10:15:34 AM	-30.8258	155.8904	↘ 147°	457.0	526.0	33000.0	-88 Descending	Aus ATC (ADS-B)
Sun 10:15:41 AM	-30.8383	155.8996	↘ 148°	457.0	526.0	32975.0	Level	FlightAware ADS-B (PQQ / YPMQ)
Sun 10:16:34 AM	-30.9325	155.9682	↘ 148°	458.0	527.0	33000.0	26 Climbing	FlightAware ADS-B (YCFS)
Sun 10:16:39 AM	-30.942	155.9751	↘ 147°	457.0	526.0	33000.0	Level	Aus ATC (ADS-B)
Sun 10:16:44 AM	-30.951	155.9817	↘ 147°	458.0	527.0	33000.0	Level	Aus ATC (ADS-B)
Sun 10:16:54 AM	-30.9688	155.9947	↘ 148°	458.0	527.0	33000.0	Level	Aus ATC (ADS-B)
Sun 10:16:59 AM	-30.978	156.0014	↘ 149°	458.0	527.0	33000.0	Level	Aus ATC (ADS-B)
Sun 10:17:04 AM	-30.9868	156.0079	↘ 146°	458.0	527.0	33000.0	Level	Aus ATC (ADS-B)
Sun 10:17:14 AM	-31.0048	156.0212	↘ 148°	459.0	528.0	33000.0	Level	Aus ATC (ADS-B)
Sun 10:17:19 AM	-31.0138	156.0277	↘ 147°	459.0	528.0	33000.0	Level	Aus ATC (ADS-B)
Sun 10:17:29 AM	-31.0316	156.0408	↘ 148°	458.0	527.0	33000.0	Level	Aus ATC (ADS-B)
Sun 10:17:44 AM	-31.0585	156.0605	↘ 148°	458.0	527.0	33000.0	Level	Aus ATC (ADS-B)
Sun 10:17:54 AM	-31.0763	156.0736	↘ 147°	458.0	527.0	33000.0	Level	Aus ATC (ADS-B)
Sun 10:18:09 AM	-31.1032	156.0934	↘ 148°	458.0	527.0	33000.0	Level	Aus ATC (ADS-B)
Sun 10:18:19 AM	-31.1212	156.1067	↘ 147°	458.0	527.0	33000.0	Level	Aus ATC (ADS-B)
Sun 10:18:24 AM	-31.1298	156.1131	↘ 149°	458.0	527.0	33000.0	Level	Aus ATC (ADS-B)
Sun 10:18:34 AM	-31.148	156.1265	↘ 148°	458.0	527.0	33000.0	Level	Aus ATC (ADS-B)
Sun 10:18:39 AM	-31.1571	156.1331	↘ 146°	459.0	528.0	33000.0	Level	Aus ATC (ADS-B)
Sun 10:18:44 AM	-31.1657	156.1395	↘ 147°	459.0	528.0	33000.0	Level	Aus ATC (ADS-B)
Sun 10:18:54 AM	-31.1838	156.1528	↘ 147°	459.0	528.0	33000.0	Level	Aus ATC (ADS-B)
Sun 10:19:09 AM	-31.2105	156.1725	↘ 148°	459.0	528.0	33000.0	Level	Aus ATC (ADS-B)
Sun 10:19:19 AM	-31.2287	156.1858	↘ 147°	459.0	528.0	33000.0	Level	Aus ATC (ADS-B)
Sun 10:19:24 AM	-31.2374	156.1922	↘ 149°	459.0	528.0	33000.0	Level	Aus ATC (ADS-B)
Sun 10:19:34 AM	-31.2556	156.2056	↘ 147°	459.0	528.0	33000.0	Level	Aus ATC (ADS-B)
Sun 10:19:43 AM	-31.2734	156.2188	↘ 148°	459.0	528.0	33000.0	Level	Aus ATC (ADS-B)
Sun 10:19:48 AM	-31.2824	156.2253	↘ 149°	459.0	528.0	33000.0	Level	Aus ATC (ADS-B)
Sun 10:19:58 AM	-31.3003	156.2387	↘ 147°	459.0	528.0	33000.0	Level	Aus ATC (ADS-B)
Sun 10:20:03 AM	-31.3093	156.2453	↘ 149°	459.0	528.0	33000.0	Level	Aus ATC (ADS-B)
Sun 10:20:08 AM	-31.3182	156.2519	↘ 146°	459.0	528.0	33000.0	Level	Aus ATC (ADS-B)
Sun 10:20:18 AM	-31.3362	156.2652	↘ 148°	459.0	528.0	33000.0	Level	Aus ATC (ADS-B)
Sun 10:20:23 AM	-31.3451	156.2718	↘ 147°	459.0	528.0	33000.0	Level	Aus ATC (ADS-B)
Sun 10:21:03 AM	-31.4169	156.3252	↘ 148°	460.0	529.0	33000.0	Level	Aus ATC (ADS-B)
Sun 10:21:07 AM	-31.4224	156.3293	↘ 148°	460.0	529.0	33000.0	Level	FlightAware ADS-B (YCFS)
Sun 10:21:13 AM	-31.4347	156.3383	↘ 147°	460.0	529.0	33000.0	Level	Aus ATC (ADS-B)
Sun 10:21:23 AM	-31.4525	156.3516	↘ 147°	460.0	529.0	33000.0	Level	Aus ATC (ADS-B)
Sun 10:21:28 AM	-31.4616	156.3583	↘ 149°	460.0	529.0	33000.0	Level	Aus ATC (ADS-B)
Sun 10:21:38 AM	-31.4796	156.3716	↘ 147°	461.0	531.0	33000.0	Level	Aus ATC (ADS-B)
Sun 10:21:43 AM	-31.4885	156.3783	↘ 149°	461.0	531.0	33000.0	Level	Aus ATC (ADS-B)
Sun 10:21:48 AM	-31.4977	156.385	↘ 147°	461.0	531.0	33000.0	Level	Aus ATC (ADS-B)
Sun 10:22:23 AM	-31.5604	156.4316	↘ 148°	461.0	531.0	33000.0	Level	Aus ATC (ADS-B)
Sun 10:22:28 AM	-31.5696	156.4385	↘ 149°	461.0	531.0	33000.0	Level	Aus ATC (ADS-B)
Sun 10:23:08 AM	-31.6415	156.492	↘ 147°	461.0	531.0	33000.0	Level	Aus ATC (ADS-B)
Sun 10:23:18 AM	-31.6595	156.5053	↘ 148°	462.0	532.0	33000.0	Level	Aus ATC (ADS-B)
Sun 10:23:23 AM	-31.6686	156.5121	↘ 146°	462.0	532.0	33000.0	Level	Aus ATC (ADS-B)
Sun 10:24:33 AM	-31.7946	156.6063	↘ 148°	462.0	532.0	33000.0	Level	Aus ATC (ADS-B)
Sun 10:24:43 AM	-31.8125	156.6198	↘ 147°	462.0	532.0	33000.0	Level	Aus ATC (ADS-B)
Sun 10:24:48 AM	-31.8217	156.6267	↘ 148°	462.0	532.0	33000.0	Level	Aus ATC (ADS-B)
Sun 10:24:58 AM	-31.8394	156.6399	↘ 148°	462.0	532.0	33000.0	Level	Aus ATC (ADS-B)
Sun 10:25:03 AM	-31.8485	156.6467	↘ 148°	462.0	532.0	33000.0	Level	Aus ATC (ADS-B)
Sun 10:25:08 AM	-31.8575	156.6535	↘ 148°	462.0	532.0	33000.0	Level	Aus ATC (ADS-B)
Sun 10:25:30 AM	-31.8969	156.683	↘ 148°	461.0	531.0	33000.0	Level	FlightAware ADS-B (YCFS)
Sun 10:25:48 AM	-31.9296	156.7075	↘ 148°	462.0	532.0	33000.0	Level	Aus ATC (ADS-B)
Sun 10:25:58 AM	-31.9475	156.7209	↘ 149°	462.0	532.0	33000.0	Level	Aus ATC (ADS-B)
Sun 10:26:13 AM	-31.9746	156.7412	↘ 148°	462.0	532.0	33000.0	Level	Aus ATC (ADS-B)
Sun 10:26:23 AM	-31.9924	156.7546	↘ 147°	461.0	531.0	33000.0	Level	Aus ATC (ADS-B)
Sun 10:26:28 AM	-32.0014	156.7613	↘ 149°	461.0	531.0	33000.0	Level	Aus ATC (ADS-B)
Sun 10:27:13 AM	-32.0821	156.8222	↘ 147°	461.0	531.0	33000.0	Level	Aus ATC (ADS-B)
Sun 10:27:28 AM	-32.1088	156.8423	↘ 147°	461.0	531.0	33000.0	Level	Aus ATC (ADS-B)
Sun 10:28:03 AM	-32.1718	156.8899	↘ 147°	461.0	531.0	33000.0	Level	Aus ATC (ADS-B)
Sun 10:28:08 AM	-32.1808	156.8966	↘ 148°	461.0	531.0	33000.0	Level	Aus ATC (ADS-B)
Sun 10:28:18 AM	-32.1984	156.9099	↘ 148°	461.0	531.0	33000.0	Level	Aus ATC (ADS-B)
Sun 10:28:23 AM	-32.2075	156.9168	↘ 148°	461.0	531.0	33000.0	Level	Aus ATC (ADS-B)
Sun 10:28:28 AM	-32.2166	156.9236	↘ 148°	461.0	531.0	33000.0	Level	Aus ATC (ADS-B)
Sun 10:28:38 AM	-32.2344	156.9372	↘ 148°	461.0	531.0	33000.0	Level	Aus ATC (ADS-B)
Sun 10:28:53 AM	-32.2613	156.9575	↘ 147°	461.0	531.0	33000.0	Level	Aus ATC (ADS-B)
Sun 10:29:03 AM	-32.2792	156.9711	↘ 146°	461.0	531.0	33000.0	Level	Aus ATC (ADS-B)
Sun 10:29:08 AM	-32.2882	156.978	↘ 147°	461.0	531.0	33000.0	Level	Aus ATC (ADS-B)
Sun 10:29:18 AM	-32.3061	156.9915	↘ 147°	461.0	531.0	33000.0	Level	Aus ATC (ADS-B)
Sun 10:29:23 AM	-32.315	156.9983	↘ 149°	462.0	532.0	33000.0	Level	Aus ATC (ADS-B)
Sun 10:29:27 AM	-32.3239	157.0051	↘ 146°	462.0	532.0	33000.0	Level	Aus ATC (ADS-B)
Sun 10:29:32 AM	-32.333	157.0119	↘ 147°	462.0	532.0	33000.0	Level	Aus ATC (ADS-B)
Sun 10:30:17 AM	-32.4137	157.0733	↘ 147°	462.0	532.0	33000.0	Level	Aus ATC (ADS-B)
Sun 10:30:27 AM	-32.4316	157.0869	↘ 147°	462.0	532.0	33000.0	Level	Aus ATC (ADS-B)
Sun 10:30:32 AM	-32.4406	157.0938	↘ 148°	462.0	532.0	33000.0	Level	Aus ATC (ADS-B)
Sun 10:30:42 AM	-32.4585	157.1074	↘ 148°	462.0	532.0	33000.0	Level	Aus ATC (ADS-B)
Sun 10:30:47 AM	-32.4675	157.1142	↘ 146°	462.0	532.0	33000.0	Level	Aus ATC (ADS-B)
Sun 10:30:52 AM	-32.4763	157.121	↘ 146°	462.0	532.0	33000.0	Level	Aus ATC (ADS-B)
Sun 10:30:57 AM	-32.4853	157.1278	↘ 148°	461.0	531.0	33000.0	Level	Aus ATC (ADS-B)
Sun 10:31:07 AM	-32.5032	157.1415	↘ 148°	461.0	531.0	33000.0	Level	Aus ATC (ADS-B)
Sun 10:31:12 AM	-32.512	157.1482	↘ 145°	461.0	531.0	33000.0	Level	Aus ATC (ADS-B)
Sun 10:31:17 AM	-32.5212	157.1552	↘ 147°	461.0	531.0	33000.0	Level	Aus ATC (ADS-B)
Sun 10:31:27 AM	-32.539	157.1688	↘ 147°	461.0	531.0	33000.0	Level	Aus ATC (ADS-B)
Sun 10:31:32 AM	-32.548	157.1757	↘ 148°	461.0	531.0	33000.0	Level	Aus ATC (ADS-B)
Sun 10:31:42 AM	-32.566	157.1894	↘ 148°	461.0	531.0	33000.0	Level	Aus ATC (ADS-B)
Sun 10:31:57 AM	-32.5928	157.2099	↘ 147°	461.0	531.0	33000.0	Level	Aus ATC (ADS-B)
Sun 10:32:07 AM	-32.6107	157.2236	↘ 147°	461.0	531.0	33000.0	Level	Aus ATC (ADS-B)
Sun 10:32:47 AM	-32.6823	157.2783	↘ 147°	461.0	531.0	33000.0	Level	Aus ATC (ADS-B)
Sun 10:32:52 AM	-32.6912	157.2852	↘ 146°	461.0	531.0	33000.0	Level	Aus ATC (ADS-B)
Sun 10:32:57 AM	-32.7001	157.292	↘ 147°	461.0	531.0	33000.0	Level	Aus ATC (ADS-B)
Sun 10:33:07 AM	-32.7181	157.3058	↘ 147°	462.0	532.0	33000.0	Level	Aus ATC (ADS-B)
Sun 10:33:12 AM	-32.7266	157.3123	↘ 148°	462.0	532.0	33000.0	Level	Aus ATC (ADS-B)
Sun 10:34:02 AM	-32.8162	157.3811	↘ 147°	463.0	533.0	33000.0	Level	Aus ATC (ADS-B)
Sun 10:34:12 AM	-32.8342	157.395	↘ 147°	463.0	533.0	33000.0	Level	Aus ATC (ADS-B)
Sun 10:34:17 AM	-32.8432	157.4019	↘ 147°	463.0	533.0	33000.0	Level	Aus ATC (ADS-B)
Sun 10:34:27 AM	-32.861	157.4156	↘ 147°	463.0	533.0	33000.0	Level	Aus ATC (ADS-B)
Sun 10:34:32 AM	-32.87	157.4226	↘ 148°	463.0	533.0	33000.0	Level	Aus ATC (ADS-B)
Sun 10:35:12 AM	-32.9417	157.4779	↘ 147°	463.0	533.0	33000.0	Level	Aus ATC (ADS-B)
Sun 10:35:17 AM	-32.9506	157.4848	↘ 147°	463.0	533.0	33000.0	Level	Aus ATC (ADS-B)
Sun 10:35:27 AM	-32.9687	157.4987	↘ 148°	463.0	533.0	33000.0	Level	Aus ATC (ADS-B)
Sun 10:35:37 AM	-32.9864	157.5124	↘ 148°	463.0	533.0	33000.0	Level	Aus ATC (ADS-B)
Sun 10:35:42 AM	-32.9955	157.5194	↘ 146°	463.0	533.0	33000.0	Level	Aus ATC (ADS-B)
Sun 10:35:52 AM	-33.0134	157.5332	↘ 146°	463.0	533.0	33000.0	Level	Aus ATC (ADS-B)
Sun 10:35:57 AM	-33.0222	157.5401	↘ 146°	463.0	533.0	33000.0	Level	Aus ATC (ADS-B)
Sun 10:36:02 AM	-33.0314	157.5472	↘ 147°	463.0	533.0	33000.0	Level	Aus ATC (ADS-B)
Sun 10:36:12 AM	-33.0494	157.561	↘ 147°	463.0	533.0	33000.0	Level	Aus ATC (ADS-B)
Sun 10:36:17 AM	-33.0583	157.5679	↘ 147°	463.0	533.0	33000.0	Level	Aus ATC (ADS-B)
Sun 10:36:27 AM	-33.0763	157.5818	↘ 147°	463.0	533.0	33000.0	Level	Aus ATC (ADS-B)
Sun 10:36:42 AM	-33.1032	157.6027	↘ 147°	463.0	533.0	33000.0	Level	Aus ATC (ADS-B)
Sun 10:36:52 AM	-33.1212	157.6165	↘ 148°	463.0	533.0	33000.0	Level	Aus ATC (ADS-B)
Sun 10:37:02 AM	-33.139	157.6305	↘ 148°	463.0	533.0	33000.0	Level	Aus ATC (ADS-B)
Sun 10:37:07 AM	-33.148	157.6374	↘ 146°	463.0	533.0	33000.0	Level	Aus ATC (ADS-B)
Sun 10:37:17 AM	-33.1661	157.6514	↘ 146°	464.0	534.0	33000.0	Level	Aus ATC (ADS-B)
Sun 10:37:22 AM	-33.1749	157.6583	↘ 145°	464.0	534.0	33000.0	Level	Aus ATC (ADS-B)
Sun 10:37:27 AM	-33.184	157.6654	↘ 146°	464.0	534.0	33000.0	Level	Aus ATC (ADS-B)
Sun 10:37:36 AM	-33.2019	157.6793	↘ 146°	464.0	534.0	33000.0	Level	Aus ATC (ADS-B)
Sun 10:37:41 AM	-33.2109	157.6864	↘ 146°	464.0	534.0	33000.0	Level	Aus ATC (ADS-B)
Sun 10:37:52 AM	-33.2288	157.7003	↘ 146°	464.0	534.0	33000.0	Level	Aus ATC (ADS-B)
Sun 10:38:01 AM	-33.2468	157.7143	↘ 146°	464.0	534.0	33000.0	Level	Aus ATC (ADS-B)
Sun 10:38:06 AM	-33.2557	157.7212	↘ 146°	464.0	534.0	33000.0	Level	Aus ATC (ADS-B)
Sun 10:38:16 AM	-33.2737	157.7353	↘ 147°	464.0	534.0	33000.0	Level	Aus ATC (ADS-B)
Sun 10:38:31 AM	-33.3006	157.7561	↘ 147°	465.0	535.0	33000.0	Level	Aus ATC (ADS-B)
Sun 10:38:41 AM	-33.3186	157.7702	↘ 147°	465.0	535.0	33000.0	Level	Aus ATC (ADS-B)
Sun 10:38:46 AM	-33.3276	157.7772	↘ 146°	465.0	535.0	33000.0	Level	Aus ATC (ADS-B)
Sun 10:38:56 AM	-33.3455	157.7911	↘ 147°	465.0	535.0	33000.0	Level	Aus ATC (ADS-B)
Sun 10:39:01 AM	-33.3546	157.7982	↘ 147°	465.0	535.0	33000.0	Level	Aus ATC (ADS-B)
Sun 10:39:06 AM	-33.3635	157.8051	↘ 146°	465.0	535.0	33000.0	Level	Aus ATC (ADS-B)
Sun 10:39:16 AM	-33.3816	157.8192	↘ 147°	465.0	535.0	33000.0	Level	Aus ATC (ADS-B)
Sun 10:39:21 AM	-33.3906	157.8262	↘ 146°	465.0	535.0	33000.0	Level	Aus ATC (ADS-B)
Sun 10:39:26 AM	-33.3994	157.8332	↘ 146°	465.0	535.0	33000.0	Level	Aus ATC (ADS-B)
Sun 10:39:31 AM	-33.4084	157.8401	↘ 146°	465.0	535.0	33000.0	Level	Aus ATC (ADS-B)
Sun 10:40:11 AM	-33.4803	157.8965	↘ 147°	465.0	535.0	33000.0	Level	Aus ATC (ADS-B)
Sun 10:40:46 AM	-33.5433	157.9459	↘ 147°	466.0	536.0	33000.0	Level	Aus ATC (ADS-B)
Sun 10:40:56 AM	-33.5613	157.96	↘ 147°	466.0	536.0	33000.0	Level	Aus ATC (ADS-B)
Sun 10:41:01 AM	-33.5703	157.9671	↘ 147°	466.0	536.0	33000.0	Level	Aus ATC (ADS-B)
Sun 10:41:11 AM	-33.5884	157.9813	↘ 147°	466.0	536.0	33000.0	Level	Aus ATC (ADS-B)
Sun 10:41:26 AM	-33.6153	158.0024	↘ 146°	466.0	536.0	33000.0	Level	Aus ATC (ADS-B)
Sun 10:41:36 AM	-33.6334	158.0167	↘ 146°	467.0	537.0	33000.0	Level	Aus ATC (ADS-B)
Sun 10:41:51 AM	-33.6604	158.0379	↘ 147°	467.0	537.0	33000.0	Level	Aus ATC (ADS-B)
Sun 10:42:01 AM	-33.6785	158.0521	↘ 147°	467.0	537.0	33000.0	Level	Aus ATC (ADS-B)
Sun 10:42:06 AM	-33.6874	158.0591	↘ 146°	467.0	537.0	33000.0	Level	Aus ATC (ADS-B)
Sun 10:42:11 AM	-33.6964	158.0662	↘ 146°	467.0	537.0	33000.0	Level	Aus ATC (ADS-B)
Sun 10:42:21 AM	-33.7144	158.0805	↘ 146°	467.0	537.0	33000.0	Level	Aus ATC (ADS-B)
Sun 10:42:26 AM	-33.7235	158.0876	↘ 145°	467.0	537.0	33000.0	Level	Aus ATC (ADS-B)
Sun 10:43:01 AM	-33.7866	158.1374	↘ 147°	467.0	537.0	33000.0	Level	Aus ATC (ADS-B)
Sun 10:43:16 AM	-33.8136	158.1587	↘ 146°	467.0	537.0	33000.0	Level	Aus ATC (ADS-B)
Sun 10:43:26 AM	-33.8317	158.1729	↘ 147°	467.0	537.0	33000.0	Level	Aus ATC (ADS-B)
Sun 10:43:31 AM	-33.8406	158.18	↘ 147°	467.0	537.0	33000.0	Level	Aus ATC (ADS-B)
Sun 10:43:41 AM	-33.8586	158.1942	↘ 147°	467.0	537.0	33000.0	Level	Aus ATC (ADS-B)
Sun 10:43:46 AM	-33.8677	158.2014	↘ 146°	467.0	537.0	33000.0	Level	Aus ATC (ADS-B)
Sun 10:43:51 AM	-33.8767	158.2085	↘ 145°	467.0	537.0	33000.0	Level	Aus ATC (ADS-B)
Sun 10:44:01 AM	-33.8947	158.2228	↘ 147°	468.0	539.0	33000.0	Level	Aus ATC (ADS-B)
Sun 10:44:06 AM	-33.9036	158.2299	↘ 147°	468.0	539.0	33000.0	Level	Aus ATC (ADS-B)
Sun 10:44:16 AM	-33.9216	158.2442	↘ 147°	468.0	539.0	33000.0	Level	Aus ATC (ADS-B)
Sun 10:45:06 AM	-34.0119	158.316	↘ 147°	468.0	539.0	33000.0	Level	Aus ATC (ADS-B)
Sun 10:45:11 AM	-34.0208	158.3231	↘ 146°	468.0	539.0	33000.0	Level	Aus ATC (ADS-B)
Sun 10:45:21 AM	-34.0388	158.3375	↘ 146°	468.0	539.0	33000.0	Level	Aus ATC (ADS-B)
Sun 10:45:26 AM	-34.0479	158.3447	↘ 148°	468.0	539.0	33000.0	Level	Aus ATC (ADS-B)
Sun 10:45:31 AM	-34.0569	158.3519	↘ 147°	468.0	539.0	33000.0	Level	Aus ATC (ADS-B)
Sun 10:45:41 AM	-34.0748	158.3662	↘ 147°	468.0	539.0	33000.0	Level	Aus ATC (ADS-B)
Sun 10:45:56 AM	-34.1019	158.3879	↘ 146°	468.0	539.0	33000.0	Level	Aus ATC (ADS-B)
Sun 10:46:06 AM	-34.1201	158.4022	↘ 147°	468.0	539.0	33000.0	Level	Aus ATC (ADS-B)
Sun 10:46:11 AM	-34.129	158.4094	↘ 146°	468.0	539.0	33000.0	Level	Aus ATC (ADS-B)
Sun 10:46:21 AM	-34.147	158.4237	↘ 146°	468.0	539.0	33000.0	Level	Aus ATC (ADS-B)
Sun 10:46:26 AM	-34.1561	158.4309	↘ 148°	468.0	539.0	33000.0	Level	Aus ATC (ADS-B)
Sun 10:46:31 AM	-34.1651	158.4381	↘ 147°	468.0	539.0	33000.0	Level	Aus ATC (ADS-B)
Sun 10:46:36 AM	-34.174	158.4452	↘ 146°	468.0	539.0	33000.0	Level	Aus ATC (ADS-B)
Sun 10:46:46 AM	-34.1921	158.4596	↘ 146°	468.0	539.0	33000.0	Level	Aus ATC (ADS-B)
Sun 10:46:51 AM	-34.2011	158.4668	↘ 148°	469.0	540.0	33000.0	Level	Aus ATC (ADS-B)
Sun 10:46:56 AM	-34.2102	158.4741	↘ 147°	468.0	539.0	33000.0	Level	Aus ATC (ADS-B)
Sun 10:47:06 AM	-34.2282	158.4885	↘ 146°	469.0	540.0	33000.0	Level	Aus ATC (ADS-B)
Sun 10:47:10 AM	-34.2374	158.4958	↘ 145°	469.0	540.0	33000.0	Level	Aus ATC (ADS-B)
Sun 10:47:20 AM	-34.2554	158.5103	↘ 147°	469.0	540.0	33000.0	Level	Aus ATC (ADS-B)
Sun 10:48:00 AM	-34.3274	158.5681	↘ 146°	469.0	540.0	33000.0	Level	Aus ATC (ADS-B)
Sun 10:48:10 AM	-34.3454	158.5827	↘ 146°	469.0	540.0	33000.0	Level	Aus ATC (ADS-B)
Sun 10:48:15 AM	-34.3545	158.5899	↘ 148°	469.0	540.0	33000.0	Level	Aus ATC (ADS-B)
Sun 10:48:20 AM	-34.3635	158.5972	↘ 147°	469.0	540.0	33000.0	Level	Aus ATC (ADS-B)
Sun 10:48:30 AM	-34.3815	158.6116	↘ 146°	469.0	540.0	33000.0	Level	Aus ATC (ADS-B)
Sun 10:48:35 AM	-34.3905	158.6189	↘ 148°	468.0	539.0	33000.0	Level	Aus ATC (ADS-B)
Sun 10:48:45 AM	-34.4085	158.6334	↘ 147°	468.0	539.0	33000.0	Level	Aus ATC (ADS-B)
Sun 10:48:50 AM	-34.4174	158.6405	↘ 145°	467.0	537.0	33000.0	Level	Aus ATC (ADS-B)
Sun 10:49:00 AM	-34.4352	158.6548	↘ 146°	467.0	537.0	33000.0	Level	Aus ATC (ADS-B)
Sun 10:49:10 AM	-34.453	158.6691	↘ 147°	467.0	537.0	33000.0	Level	Aus ATC (ADS-B)
Sun 10:49:15 AM	-34.4617	158.6762	↘ 146°	467.0	537.0	33000.0	Level	Aus ATC (ADS-B)
Sun 10:50:40 AM	-34.6147	158.7996	↘ 146°	468.0	539.0	33000.0	Level	Aus ATC (ADS-B)
Sun 12:09:22 PM	-43.0482	166.6692	↘ 147°	470.0	541.0	33000.0	Level	FlightAware ADS-B (ALR / NZLX)
Sun 12:10:02 PM	-43.123	166.6484	↙ 212°	418.0	481.0	33000.0	Level	FlightAware ADS-B (ALR / NZLX)
Sun 12:17:24 PM	-43.8974	166.3613	↘ 153°	479.0	551.0	32975.0	Level	FlightAware ADS-B (ALR / NZLX)
Sun 12:18:00 PM	-43.9667	166.4099	↘ 153°	479.0	551.0	32975.0	20 Climbing	FlightAware ADS-B (ALR / NZLX)
Sun 12:18:40 PM	-44.0461	166.466	↘ 153°	481.0	554.0	33000.0	19 Climbing	FlightAware ADS-B (ALR / NZLX)
Sun 12:19:20 PM	-44.1262	166.5229	↘ 153°	483.0	556.0	33000.0	Level	FlightAware ADS-B (ALR / NZLX)
Sun 12:19:50 PM	-44.184	166.5669	↘ 146°	490.0	564.0	33000.0	-33 Descending	FlightAware ADS-B (ALR / NZLX)
Sun 12:20:06 PM	-44.2126	166.5997	↘ 135°	496.0	571.0	32975.0	Level	FlightAware ADS-B (ALR / NZLX)
Sun 12:20:29 PM	-44.247	166.6574	↘ 125°	500.0	575.0	33000.0	25 Climbing	FlightAware ADS-B (ALR / NZLX)
Sun 12:21:05 PM	-44.2941	166.7515	↘ 125°	500.0	575.0	33000.0	Level	FlightAware ADS-B (ALR / NZLX)
Sun 12:21:46 PM	-44.3486	166.8594	↘ 125°	500.0	575.0	33000.0	-19 Descending	FlightAware ADS-B (ALR / NZLX)
Sun 12:22:22 PM	-44.396	166.9535	↘ 125°	502.0	578.0	32975.0	Level	FlightAware ADS-B (NZJS)
Sun 12:23:07 PM	-44.457	167.0753	↘ 125°	502.0	578.0	33000.0	19 Climbing	FlightAware ADS-B (NZTZ)
Sun 12:23:41 PM	-44.5023	167.166	↘ 125°	504.0	580.0	33000.0	Level	FlightAware ADS-B (NZTZ)
Sun 12:24:11 PM	-44.5416	167.2447	↘ 125°	504.0	580.0	33000.0	-25 Descending	FlightAware ADS-B (ALR / NZLX)
Sun 12:24:42 PM	-44.5814	167.3252	↘ 125°	505.0	581.0	32975.0	Level	FlightAware ADS-B (NZDC)
Sun 12:25:12 PM	-44.6225	167.4079	↘ 125°	507.0	583.0	33000.0	25 Climbing	FlightAware ADS-B (NZJS)
Sun 12:25:42 PM	-44.661	167.4858	↘ 125°	509.0	586.0	33000.0	-25 Descending	FlightAware ADS-B (NZDC)
Sun 12:26:12 PM	-44.7021	167.5688	↘ 125°	511.0	588.0	32975.0	Level	FlightAware ADS-B (NZDC)
Sun 12:26:47 PM	-44.7501	167.6668	↘ 125°	511.0	588.0	33000.0	21 Climbing	FlightAware ADS-B (NZTZ)
Sun 12:27:23 PM	-44.7988	167.7665	↘ 124°	510.0	587.0	33000.0	Level	FlightAware ADS-B (DUD / NZDN)
Sun 12:27:53 PM	-44.8378	167.8463	↘ 125°	508.0	585.0	33000.0	-275 Descending	FlightAware ADS-B (NZTZ)
Sun 12:28:23 PM	-44.8785	167.9298	↘ 125°	511.0	588.0	32725.0	-750 Descending	FlightAware ADS-B (NZTZ)
Sun 12:28:57 PM	-44.9234	168.0222	↘ 124°	516.0	594.0	32200.000000000004	-1,177 Descending	FlightAware ADS-B (CHC / NZCH)
Sun 12:29:28 PM	-44.9642	168.1067	↘ 124°	514.0	592.0	31450.0	-2,066 Descending	FlightAware ADS-B (NZDC)
Sun 12:29:58 PM	-45.0044	168.1898	↘ 124°	514.0	592.0	30100.0	-2,450 Descending	FlightAware ADS-B (NZDC)
Sun 12:30:28 PM	-45.0455	168.2752	↘ 124°	506.0	582.0	29000.0	-2,125 Descending	FlightAware ADS-B (CHC / NZCH)
Sun 12:30:58 PM	-45.0835	168.3546	↘ 124°	500.0	575.0	27975.0	-2,100 Descending	FlightAware ADS-B (NZDC)
Sun 12:31:28 PM	-45.1228	168.437	↘ 124°	492.0	566.0	26900.0	-2,075 Descending	FlightAware ADS-B (ALR / NZLX)
Sun 12:31:58 PM	-45.16	168.5149	↘ 124°	486.0	559.0	25900.0	-2,000 Descending	FlightAware ADS-B (DUD / NZDN)
Sun 12:32:28 PM	-45.1973	168.5934	↘ 124°	477.0	549.0	24900.0	-2,000 Descending	FlightAware ADS-B (DUD / NZDN)
Sun 12:32:58 PM	-45.234	168.6708	↘ 124°	470.0	541.0	23900.0	-1,975 Descending	FlightAware ADS-B (DUD / NZDN)
Sun 12:33:28 PM	-45.2701	168.7468	↘ 124°	467.0	537.0	22925.0	-1,925 Descending	FlightAware ADS-B (DUD / NZDN)
Sun 12:33:58 PM	-45.3061	168.8229	↘ 124°	466.0	536.0	21975.0	-1,975 Descending	FlightAware ADS-B (DUD / NZDN)
Sun 12:34:28 PM	-45.3413	168.8981	↘ 124°	458.0	527.0	20950.0	-1,943 Descending	FlightAware ADS-B (IVC / NZNV)
Sun 12:34:59 PM	-45.3775	168.9754	↘ 124°	447.0	514.0	20000.0	-1,893 Descending	FlightAware ADS-B (DUD / NZDN)
Sun 12:35:29 PM	-45.4119	169.0494	↘ 124°	441.0	507.0	19025.0	-1,850 Descending	FlightAware ADS-B (ALR / NZLX)
Sun 12:35:59 PM	-45.4455	169.1213	↘ 124°	435.0	501.0	18150.0	-1,800 Descending	FlightAware ADS-B (ALR / NZLX)
Sun 12:36:29 PM	-45.479	169.1931	↘ 124°	435.0	501.0	17225.0	-1,850 Descending	FlightAware ADS-B (ALR / NZLX)
Sun 12:36:59 PM	-45.5117	169.2634	↘ 123°	430.0	495.0	16300.0	-1,300 Descending	FlightAware ADS-B (DUD / NZDN)
Sun 12:37:29 PM	-45.5435	169.3319	↘ 123°	405.0	466.0	15925.0	-675 Descending	FlightAware ADS-B (DUD / NZDN)
Sun 12:37:59 PM	-45.5724	169.3962	↘ 123°	388.0	447.0	15625.0	-550 Descending	FlightAware ADS-B (IVC / NZNV)
Sun 12:38:29 PM	-45.5997	169.4574	↘ 122°	375.0	432.0	15375.0	-500 Descending	FlightAware ADS-B (DUD / NZDN)
Sun 12:38:59 PM	-45.6279	169.5202	↘ 123°	358.0	412.0	15125.0	-975 Descending	FlightAware ADS-B (DUD / NZDN)
Sun 12:39:29 PM	-45.6556	169.5822	↘ 122°	358.0	412.0	14400.0	-1,471 Descending	FlightAware ADS-B (DUD / NZDN)
Sun 12:39:51 PM	-45.6747	169.6233	↘ 127°	362.0	417.0	13850.0	-1,125 Descending	FlightAware ADS-B (NZDC)
Sun 12:40:09 PM	-45.696	169.6459	↘ 152°	338.0	389.0	13650.0	-1,461 Descending	FlightAware ADS-B (DUD / NZDN)
Sun 12:40:29 PM	-45.7258	169.6505	↓ 182°	312.0	359.0	12925.0	-1,815 Descending	FlightAware ADS-B (DUD / NZDN)
Sun 12:41:11 PM	-45.7865	169.6529	↓ 177°	305.0	351.0	11775.0	-1,542 Descending	FlightAware ADS-B (IVC / NZNV)
Sun 12:41:41 PM	-45.8277	169.6559	↓ 177°	287.0	330.0	11075.0	-1,500 Descending	FlightAware ADS-B (IVC / NZNV)
Sun 12:42:11 PM	-45.8662	169.6582	↓ 178°	270.0	311.0	10275.0	-1,475 Descending	FlightAware ADS-B (IVC / NZNV)
Sun 12:42:41 PM	-45.904	169.6605	↓ 178°	262.0	302.0	9600.0	-1,350 Descending	FlightAware ADS-B (NZDH)
Sun 12:43:11 PM	-45.9402	169.6617	↓ 179°	257.0	296.0	8925.0	-1,325 Descending	FlightAware ADS-B (NZDH)
Sun 12:43:41 PM	-45.975	169.6634	↓ 175°	250.0	288.0	8275.0	-1,281 Descending	FlightAware ADS-B (NZDH)
Sun 12:43:59 PM	-45.9939	169.6749	↘ 149°	261.0	300.0	7900.0	-1,388 Descending	FlightAware ADS-B (IVC / NZNV)
Sun 12:44:21 PM	-46.0081	169.7078	→ 105°	262.0	302.0	7350.0	-1,404 Descending	FlightAware ADS-B (NZDH)
Sun 12:44:46 PM	-46.0146	169.7509	→ 103°	259.0	298.0	6800.0	-1,309 Descending	FlightAware ADS-B (NZDH)
Sun 12:45:16 PM	-46.0224	169.8006	→ 103°	253.0	291.0	6150.0	-1,325 Descending	FlightAware ADS-B (NZDH)
Sun 12:45:46 PM	-46.0301	169.849	→ 103°	246.0	283.0	5475.0	-1,300 Descending	FlightAware ADS-B (NZDH)
Sun 12:46:16 PM	-46.0376	169.8964	→ 103°	240.0	276.0	4850.0	-1,211 Descending	FlightAware ADS-B (NZDH)
Sun 12:46:43 PM	-46.0434	169.9367	→ 99°	223.0	257.0	4325.0	-1,267 Descending	FlightAware ADS-B (DUD / NZDN)
Sun 12:47:01 PM	-46.0402	169.9598	↗ 62°	195.0	224.0	3900.0	-1,333 Descending	FlightAware ADS-B (NZDH)
Sun 12:47:19 PM	-46.0319	169.978	↗ 57°	186.0	214.0	3525.0	-1,063 Descending	FlightAware ADS-B (NZDC)
Sun 12:47:49 PM	-46.0181	170.008	↗ 56°	161.0	185.0	3050.0	-875 Descending	FlightAware ADS-B (NZDH)
Sun 12:48:19 PM	-46.0064	170.0328	↗ 56°	145.0	167.0	2650.0	-762 Descending	FlightAware ADS-B (DUD / NZDN)
Sun 12:48:50 PM	-45.9948	170.057	↗ 55°	144.0	166.0	2275.0	-762 Descending	FlightAware ADS-B (DUD / NZDN)
Sun 12:49:20 PM	-45.9833	170.0817	↗ 57°	155.0	178.0	1875.0	-775 Descending	FlightAware ADS-B (DUD / NZDN)
Sun 12:49:50 PM	-45.9716	170.1074	↗ 56°	153.0	176.0	1500.0	-750 Descending	FlightAware ADS-B (DUD / NZDN)
Sun 12:50:06 PM	-45.9659	170.1196	↗ 57°	156.0	180.0	1300.0	-750 Descending	FlightAware ADS-B (DUD / NZDN)
Sun 12:50:26 PM	-45.9582	170.1358	↗ 56°	145.0	167.0	1050.0	-750 Descending	FlightAware ADS-B (DUD / NZDN)
Sun 12:50:44 PM	-45.9513	170.1504	↗ 56°	148.0	170.0	825.0	-729 Descending	FlightAware ADS-B (NZDC)
Sun 12:51:01 PM	-45.9449	170.1641	↗ 56°	143.0	165.0	625.0	-727 Descending	FlightAware ADS-B (DUD / NZDN)
Sun 12:51:17 PM	-45.9387	170.1772	↗ 56°	145.0	167.0	425.0	-750 Descending	FlightAware ADS-B (DUD / NZDN)
