# Supplementary material for: TrackMatcher – a tool for finding intercepts in tracks of geographical positions
Source: Copernicus journal article supplement (doi:10.5194/gmd-15-7557-2022), 2022-10-18
Supplement: Supplementary file 1 [file gmd-15-7557-2022-supplement.zip › ESM/example/install.jl]

# Load package manager
import Pkg

# Activate Environment
# Pkg.activate(".")

# Install TrackMatcher
Pkg.add(url="https://github.com/LIM-AeroCloud/PCHIP.jl.git")
Pkg.add(url="https://github.com/LIM-AeroCloud/TrackMatcher.jl.git")
