# Supplementary material for: TrackMatcher – a tool for finding intercepts in tracks of geographical positions
Source: Copernicus journal article supplement (doi:10.5194/gmd-15-7557-2022), 2022-10-18
Supplement: Supplementary file 1 [file gmd-15-7557-2022-supplement.zip › gmd-15-7557-2022-supplement-title-page.pdf]

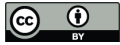

## *Supplement of*

# **TrackMatcher – a tool for finding intercepts in tracks of geographical positions**

**Peter Bräuer and Matthias Tesche**

*Correspondence to:* Matthias Tesche ([matthias.tesche@uni-leipzig.de](mailto:matthias.tesche@uni-leipzig.de))

- [gmd-15-7557-2022-supplement-title-page.pdf](#)
- ESM
  - [ESM.pdf](#)
  - [example](#)
    - \* [data](#)
    - \* [example.jl](#)
    - \* [extended\\_example.jl](#)
    - \* [install.jl](#)

The copyright of individual parts of the supplement might differ from the article licence.
